# Supplementary material for: Regulation of carotenoid and chlorophyll pools in hesperidia, anatomically unique fruits found only in Citrus
Source: Oxford University Press journal article supplement (doi:10.1093/plphys/kiab291), 2021-06-23
Supplement: kiab291_supplementary_data.zip [file kiab291_supplementary_data.zip]

Archive with 4 entries (4 files):
- pp.00610.2021-s01.pdf
- pp.00610.2021-s02.xlsx
- pp.00610.2021-s03.xlsx
- pp.00610.2021-s04.xlsx
