# Supplementary material for: Regulation of carotenoid and chlorophyll pools in hesperidia, anatomically unique fruits found only in Citrus
Source: Oxford University Press journal article supplement (doi:10.1093/plphys/kiab291), 2021-06-23
Supplement: kiab291_supplementary_data.zip [file kiab291_supplementary_data.zip › pp.00610.2021-s02.xlsx]

## Sheet: Supplemental Table S1
Supplemental Table S1 Chlorophylls and their concentrations in the flavedo of WT and MT during development and maturation.
Chlorophyll (μg/g FW)	90		120		150		170		190		210		230		250		280		310		340
	WT	MT	WT	MT	WT	MT	WT	MT	WT	MT	WT	MT	WT	MT	WT	MT	WT	MT	WT	MT	WT	MT
Chlorophyllide a	15.42±1.66	6.97±0.93*	7.42±1.14	7.57±1.46	5.06±1.45	10.22±3.47	9.96±1.1	6.25±0.5	9.47±0.82	6.33±0.54	3.58±0.32	5.74±0.23	-	4.1±1.21	-	3±0.55	-	3.3±0.51	-	-	-	-
Pheophorbide a	6.38±1.25	1.58±0.63*	-	-	-	4.4±1.33	3.05±1.28	4.84±2.15	2.52±0.05	2.01±0.53	-	-	-	0.75±0.12	-	0.21±0.21	-	1.09±0.54	-	-	-	-
Chlorophyll a	323.36±6.13	307.17±16.22	267.81±9.71	253.14±19.82	206.51±26.9	185.4±12.61	166.09±30.92	145.81±22.75	126.92±15.75	111.41±4.3	67.19±6.01	118.54±5.49**	8.34±1.99	109.44±20.03**	2.76±0.47	93.31±4.95**	0.55±0.11	65.12±8.36**	0.64±0.16	54.83±9.26**	0.32±0.2	44.69±3.5**
Pheophytin a	1.88±0.49	8.53±1.49*	8.76±0.59	10.92±1.19	6.09±1.04	8.81±1.31	5.77±1.13	5.13±0.29	7.12±0.97	5.11±0.84	0.56±0.13	0.3±0.05	0.13±0.09	0.54±0.06**	0.04±0.02	0.35±0.12**	0.09±0.02	0.48±0.28**	0.1±0.02	0.27±0.01**	0.08±0.05	0.31±0.1**
Chlorophyll b	211.92±10.81	191.66±9.18	172.99±2.51	129.44±4.21*	95.51±16.67	72±10.63	60.89±12.11	80.37±8.97	42.88±8.05	35.57±7.39	20.52±3.51	38.58±2.93**	1.38±0.57	30.27±10.97**	0.58±0.11	28.19±2.12**	0.1±0.03	21.44±1.48**	0.11±0.03	13.11±2.77**	0.08±0.03	9.76±1.83**
Total	551.7±17.16	515.91±20.48	456.98±12.59	401.06±16.56	313.17±43.27	280.84±12.71	245.76±44.01	242.4±28.46	188.91±23.31	160.43±8.57	91.85±9.39	163.16±7.95**	9.84±2.32	145.1±31.62**	3.38±0.58	125.07±6.26**	0.74±0.14	91.44±9.7**	0.85±0.21	68.22±11.76**	0.48±0.28	54.76±5.27**
Results are means ± SD from at least three biological replicates. Asterisks indicate statistically significant differences compared to WT (Student’s t test P value, *P<0.05, **P<0.01). "-" denotes not detected.

## Sheet: Supplemental Table S2
Supplemental Table S2 Carotenoids and their concentrations in the flavedo of WT and MT during development and maturation.
Carotenoid (μg/g DW)	90		120		150		170		190		210		230		250		280		310		340
	WT	MT	WT	MT	WT	MT	WT	MT	WT	MT	WT	MT	WT	MT	WT	MT	WT	MT	WT	MT	WT	MT
Violaxanthin	111.13±19.48	91.06±8.45	79.78±9.98	72.19±5.51	102.57±14.17	87.65±13.5	105.29±15.26	92.18±20.01	98.23±8.06	150.92±24.33*	90.78±9.23	133.17±25.68	156.83±24.03	249.91±43.41*	187.66±13.53	290.84±25.48**	216.1±43.9	355.67±33.82**	295.13±23.31	446.9±9.43**	336.25±72.73	493.78±29.53*
Luteoxanthin	12.02±0.68	15.42±2.78	17.47±2.07	17.84±3.56	12.96±2.88	16.16±1.35	18.57±1.77	29.36±4.83	17.75±4.17	41.84±8.67	29±1.64	66.66±7.08*	20.36±2.72	60.89±14.41*	9.82±2.84	50.06±5.8*	24.04±5.56	55.68±10.89	33.83±9.15	52.53±4.12	97.7±17.74	122.19±33.14
β-Citraurin	-	-	-	-	-	-	-	-	-	-	-	-	46.06±12.18	117.77±27.06	56.88±3.45	107.75±7.55*	68.3±5.91	120.72±2.82**	90.27±0.47	120.96±13.94	106.43±21.74	137.36±18.3
Lutein	338.71±48.8	294.03±23.53	289.76±26.97	236.22±24.72	258.48±40.19	155.67±21.43	240.43±31.01	122.52±17.26*	113.49±9.53	82.88±11.02	49.09±10.17	51.02±8.77	26.15±1.85	63.43±10.24*	14.59±1.53	59.03±3.47**	15.11±1.9	43.92±6.15*	14.94±3.31	35.37±1.01**	28.62±6.52	40.89±4.51
β-Cryptoxanthin	-	-	-	-	-	-	-	-	4.55±0.4	5.92±0.99	5.48±0.25	10.6±1.76*	8.92±1.71	17.28±1.18*	11.62±2.7	27.76±3.14*	16.3±3.55	16.74±1.3	16.92±1.52	21.3±1.03	18.57±3.25	19.51±3.92
β-Carotene	25.34±6.26	27.59±2.1	25.79±1.15	22.95±7.52	19.79±3.45	17.51±3.62	22.02±1.17	18.91±1.71	21.17±1.34	16±1.01	12.69±1.38	13.63±2.99	2.88±0.44	10.5±1.86*	1.97±0.33	6.84±0.35**	2.18±0.46	6.85±0.37**	2.4±0.36	6.83±0.44**	3±0.61	9.53±2.22
Phytoene	-	-	-	-	-	-	-	7.92±1.1	-	8.83±2.71	9.64±1.06	26.22±3.68*	-	79.66±14.06	24.58±0.88	87.51±9.05**	42.99±3.42	101.28±13.13*	47.08±1.5	110.13±6.77**	56.34±9.85	110.6±12.79
Phytofluene	-	-	-	-	-	-	-	-	-	24.4±6.07	14.11±0.14	106.74±17.48*	32.61±3.5	291.85±34.59**	70.67±11.66	355.13±12.72**	134.15±20.75	390.33±43.96**	175.72±10.02	469.08±45.24*	209.57±41.83	553.36±42.91*
Total	487.21±73.71	428.09±36.41	412.81±35.81	349.2±40.33	393.8±58.72	276.99±35.85	386.31±46.6	270.88±38.08	255.2±20.24	330.79±45.93	210.79±2.52	408.04±47.39*	293.82±44.02	891.29±53.22**	377.79±26.65	984.93±44.29**	519.17±67	1091.18±81.18**	676.29±18.67	1263.1±56.55**	856.48±83.23	1487.2±83.92**
Results are means ± SD from at least three biological replicates. Asterisks indicate statistically significant differences compared to WT (Student’s t test P value, *P<0.05, **P<0.01). "-" denotes not detected.

## Sheet: Supplemental Table S4
Supplemental Table S4 Gene set 1A
Gene_ID	Annotation
Cs5g15530	Terpene synthase-like; Terpenoid synthase (Fragment);Ent-copalyl diphosphate synthase, chloroplastic; Ent-copalyl diphosphate synthase 1, chloroplastic; Syn-copalyl diphosphate synthase; Ent-copalyl diphosphate synthase 2; Levopimaradiene synthase, chloroplastic; Abietadiene synthase, chloroplastic; Isopimaradiene synthase, chloroplastic; Alpha-bisabolene synthase; Taxadiene synthase; (E)-gamma-b…
Cs3g06820	Putative progesterone 5 beta reductase
Cs2g21470
Cs7g14940	Gibberellin 2-beta-dioxygenase 8; Gibberellin 20 oxidase 3; 1-aminocyclopropane-1-carboxylate oxidase homolog 5; 1-aminocyclopropane-1-carboxylate oxidase 4; Probable 1-aminocyclopropane-1-carboxylate oxidase; Codeine O-demethylase; Protein SRG1; Deacetoxyvindoline 4-hydroxylase; Leucoanthocyanidin dioxygenase; S-norcoclaurine synthase 1; Flavonol synthase/flavanone 3-hydroxylase; Probable 2-oxoa…
Cs5g09860	7-ethoxycoumarin O-deethylase; Cytochrome P450 76C4; Flavonoid 3'-monooxygenase; Cytochrome P450 76A1 (Fragment); Probable (S)-N-methylcoclaurine 3'-hydroxylase isozyme 2; (S)-N-methylcoclaurine 3'-hydroxylase isozyme 1 (Fragment); (S)-N-methylcoclaurine 3'-hydroxylase isozyme 2; Berbamunine synthase; Licodione synthase; 5-epiaristolochene 1,3-dihydroxylase; Premnaspirodiene oxygenase; 4-hydroxyp…
Cs2g09840	Alpha/beta-hydrolase domain-containing protein
Cs5g10040	Senescence-inducible chloroplast stay-green protein (Fragment)
orange1.1t01192	BAHD acyltransferase At5g47980; Deacetylvindoline O-acetyltransferase; Vinorine synthase; Salutaridinol 7-O-acetyltransferase;3'-N-debenzoyl-2'-deoxytaxol N-benzoyltransferase, putative
Cs2g16120	Putative orcinol O-methyltransferase (Fragment);Myricetin O-methyltransferase; Chavicol O-methyltransferase; Eugenol O-methyltransferase; 8-hydroxyquercetin 8-O-methyltransferase; 6a-hydroxymaackiain methyltransferase 1; Tabersonine 16-O-methyltransferase; Isoflavone 7-O-methyltransferase; Isoflavone-7-O-methyltransferase 8; O-methyltransferase ZRP4; 5-pentadecatrienyl resorcinol O-methyltransfer…
Cs3g23560	Pentatricopeptide repeat-containing protein, putative;Alpha-amylase; Alpha-amylase isozyme 3C; Alpha-amylase type B isozyme; Alpha-amylase type A isozyme; Alpha-amylase type B isozyme (Fragment); Glucan 1,4-alpha-maltotetraohydrolase; Alpha-amylase isozyme C
Cs9g16640	UDP-glycosyltransferase 76C4; Cyanohydrin beta-glucosyltransferase; Limonoid UDP-glucosyltransferase; Anthocyanidin 3-O-glucosyltransferase 7 (Fragment); Anthocyanidin 3-O-glucosyltransferase;UDP-glucoronosyl/UDP-glucosyl transferase family protein
Cs4g18090	Putative dicyanin blue copper protein (Precursor);Umecyanin; Blue copper protein; Cucumber peeling cupredoxin; Early nodulin-like protein 1; Stellacyanin; Mavicyanin; Uclacyanin-2; Basic blue protein; Chemocyanin; Lamin-like protein; Early nodulin-55-2; Pollen allergen Amb a 3
Cs4g07930	Subtilisin-like serine protease AIR3 (Fragment);Subtilisin-like protease; Cucumisin; Xylem serine proteinase 1; Minor extracellular protease vpr; Serine protease AprX; Major intracellular serine protease
Cs1g21000	Transcription factor bHLH25; Anthocyanin regulatory R-S protein; Transcription factor ABA-INDUCIBLE bHLH-TYPE; Anthocyanin regulatory Lc protein; Transcription factor GLABRA 3; Transcription factor ABORTED MICROSPORES; Transcription factor ALC; Transcription factor SPATULA; Transcription factor FER-LIKE IRON DEFICIENCY-INDUCED TRANSCRIPTION FACTOR;Helix-loop-helix DNA-binding domain containing pr…
Cs6g07400	Laccase-7; Laccase-9; Laccase-8; Laccase-24; Laccase-12; Laccase-3; Laccase-25; Laccase-5; Laccase-14; Laccase-6; Laccase-23; Putative laccase-17; Laccase-13; Laccase-12/13; Laccase-4; Laccase-2; Laccase-11; Laccase-17; Laccase-10; Laccase-1; Laccase-15; Laccase-19; Laccase-22; Laccase-16; Laccase-20; Laccase-21; Laccase-18; L-ascorbate oxidase;Putative uncharacterized protein Sb03g038550
Cs8g08820	Probable aquaporin PIP2-6; Probable aquaporin PIP-type pTOM75; Aquaporin-4; Aquaporin PIP1-3; Aquaporin PIP-type; Aquaporin PIP 1-3; Aquaporin-5; Aquaporin-1; Lens fiber major intrinsic protein; Aquaporin AQPAn.G; Aquaporin-2; Aquaporin FA-CHIP; Probable aquaporin TIP-type alpha;Putative uncharacterized protein Sb06g023240
Cs7g16680	Uncharacterized plant-specific domain TIGR01615 family protein
Cs5g28730	2-oxoglutarate (2OG) and Fe(II)-dependent oxygenase-like protein;1-aminocyclopropane-1-carboxylate oxidase homolog 11; Flavonol synthase/flavanone 3-hydroxylase; Thebaine 6-O-demethylase; Gibberellin 20 oxidase 1; Flavanone 3-dioxygenase; Naringenin,2-oxoglutarate 3-dioxygenase; Codeine O-demethylase; Protein SRG1; Probable 2-oxoglutarate/Fe(II)-dependent dioxygenase; Naringenin,2-oxoglutarate 3-…
orange1.1t03155
Cs2g29780	Hydroxycinnamoyl CoA shikimate/quinate hydroxycinnamoyltransferase-like protein;Benzyl alcohol O-benzoyltransferase; 13-hydroxylupanine O-tigloyltransferase; (Z)-3-hexen-1-ol acetyltransferase; Omega-hydroxypalmitate O-feruloyl transferase; Taxadien-5-alpha-ol O-acetyltransferase; 10-deacetylbaccatin III 10-O-acetyltransferase
Cs3g05310	Putative uncharacterized protein;Cytochrome P450 82C4; Cytochrome P450 82A1 (Fragment); Flavonoid 3'-monooxygenase; Isoflavone 2'-hydroxylase; Beta-amyrin 24-hydroxylase; Psoralen synthase (Fragment); (+)-menthofuran synthase; Psoralen synthase; Premnaspirodiene oxygenase; Germacrene A oxidase; Licodione synthase
Cs3g14610	Pectin methyl-esterase PER (Precursor);Putative pectinesterase/pectinesterase inhibitor 28; Probable pectinesterase/pectinesterase inhibitor 21; Pectinesterase/pectinesterase inhibitor; Pectinesterase 3
Cs7g29570	Probable WRKY transcription factor 70; WRKY transcription factor 55; Protein WRKY1;WRKY74-superfamily of TFs having WRKY and zinc finger domains
orange1.1t02800	Vinorine synthase; Salutaridinol 7-O-acetyltransferase; Deacetylvindoline O-acetyltransferase; BAHD acyltransferase At5g47980;3'-N-debenzoyl-2'-deoxytaxol N-benzoyltransferase, putative
Cs5g12900	(-)-germacrene D synthase; (E)-beta-farnesene synthase; Valencene synthase; (+)-delta-cadinene synthase isozyme C2; (+)-delta-cadinene synthase isozyme A; (+)-delta-cadinene synthase; Pinene synthase; (E,E)-germacrene B synthase; Beta-caryophyllene synthase; Germacrene C synthase; Vetispiradiene synthase 1; Probable 5-epi-aristolochene synthase 4; 5-epi-aristolochene synthase; 5-epiaristolochene …
Cs6g09810	Putative uncharacterized protein At2g38500
Cs3g01585
Cs3g18660	Low affinity sulfate transporter 3; Sulfate transporter 2.2; High affinity sulfate transporter 1; Early nodulin-70; Probable sulfate transporter 3.4; Sulfate transporter 4.1, chloroplastic; Sulfate permease 2; Probable sulfate permease C3H7.02; Sodium-independent sulfate anion transporter;High affinity sulfate transporter SAT-1, Sulfate/bicarbonate/oxalate exchanger SLC26 family protein
Cs5g25950	Cytochrome P450-dependent monooxygenase-like protein;Cytochrome P450 83B1; 2-methylbutanal oxime monooxygenase; 4-hydroxyphenylacetaldehyde oxime monooxygenase; Bifunctional dihydrocamalexate synthase/camalexin synthase; Cytochrome P450 71D11 (Fragment); 5-epiaristolochene 1,3-dihydroxylase; Premnaspirodiene oxygenase; Germacrene A oxidase
Cs5g25690	Putative germin E protein (Fragment);Germin-like protein subfamily 1 member 13; Putative germin-like protein subfamily 1 member 2; Germin-like protein; Putative germin-like protein 2-3; Probable germin-like protein subfamily 2 member 5; Nectarin-1
Cs6g01980	Putative isopenicillin N epimerase, identical
Cs8g09780	Cytochrome P450, family 76, subfamily C, polypeptide 6;Cytochrome P450 76C4; 7-ethoxycoumarin O-deethylase; Probable (S)-N-methylcoclaurine 3'-hydroxylase isozyme 2; Flavonoid 3'-monooxygenase; (S)-N-methylcoclaurine 3'-hydroxylase isozyme 1 (Fragment); (S)-N-methylcoclaurine 3'-hydroxylase isozyme 2; Cytochrome P450 76A1 (Fragment); Berbamunine synthase; Premnaspirodiene oxygenase; Germacrene A …
Cs7g08730	Protein disulfide isomerase (PDI)-like protein 2;Probable nucleoredoxin 1; Nucleoredoxin; Tryparedoxin; Nucleoredoxin-like protein 1
orange1.1t03773	Linoleate 13S-lipoxygenase 2-1, chloroplastic; Lipoxygenase 2, chloroplastic; Probable lipoxygenase 8, chloroplastic; Lipoxygenase 6, choloroplastic; Probable lipoxygenase 6; Putative lipoxygenase 5; Linoleate 9S-lipoxygenase 1; Linoleate 9S-lipoxygenase 6 (Fragment); Probable linoleate 9S-lipoxygenase 4; Linoleate 9S-lipoxygenase A; Seed linoleate 9S-lipoxygenase; Putative linoleate 9S-lipoxygen…
Cs5g05240	Putative mitochondrial aldehyde dehydrogenase ALDH2a;Aldehyde dehydrogenase family 2 member B4, mitochondrial; Aldehyde dehydrogenase, mitochondrial; Retinal dehydrogenase 2; Aldehyde dehydrogenase X, mitochondrial; Aldehyde dehydrogenase, cytosolic 1; Aldehyde dehydrogenase family 1 member A3; Aldehyde dehydrogenase; Putative aldehyde dehydrogenase-like protein C9E9.09c; Omega-crystallin; Aldehy…
Cs6g16980	3-oxoacyl-[acyl-carrier-protein] reductase FabG; Glucose 1-dehydrogenase; Oxidoreductase ucpA; Glucose 1-dehydrogenase B; Uncharacterized oxidoreductase yohF; 3-oxoacyl-[acyl-carrier-protein] reductase, chloroplastic; Probable L-xylulose reductase; Uncharacterized oxidoreductase ygcW; Glucose 1-dehydrogenase A; Tropinone reductase 1; 3-oxoacyl-[acyl-carrier-protein] reductase 3, chloroplastic; 3-…
Cs8g09070	Putative uncharacterized protein Sb01g026180
Cs2g23870	Probable aminotransferase TAT2; Tyrosine aminotransferase; Nicotianamine aminotransferase B; Nicotianamine aminotransferase A; S-alkyl-thiohydroximate lyase SUR1; Cystine lyase CORI3; Probable alanine aminotransferase, mitochondrial;Putative uncharacterized protein Sb02g003520
Cs4g12760	Myb-related protein Zm1; Transcription repressor MYB4; Transcription factor MYB39; Myb-related protein P; Protein ODORANT1; Anthocyanin regulatory C1 protein; Transcription factor WER; Transcription factor GAMYB; Trichome differentiation protein GL1; Transcriptional activator Myb; Myb-related protein A;Myb-related protein Myb4, putative, expressed
Cs4g19060	Receptor-like protein kinase HSL1; LRR receptor-like serine/threonine-protein kinase HSL2; Leucine-rich repeat receptor-like protein kinase TDR; Receptor protein kinase CLAVATA1; Leucine-rich repeat receptor-like protein kinase PXL2; Leucine-rich repeat receptor-like serine/threonine-protein kinase BAM1; Probable leucine-rich repeat receptor-like protein kinase At5g63930; Probable LRR receptor-li…
Cs5g07856	Expansin-like B1; Expansin-B10; Expansin-B1; Expansin-B18; Expansin-B15; Expansin-B7; Expansin-B5; Pollen allergen Phl p 1; Expansin-B4; Expansin-B3; Major pollen allergen Hol l 1; Pollen allergen Lol p 1; Expansin-B2; Expansin-B9; Putative expansin-B2; Expansin-B11; Expansin-B6; Major pollen allergen Pha a 1; Major pollen allergen Cyn d 1; Expansin-B8; Expansin-B12; Expansin-B17; Expansin-B16; E…
orange1.1t04609	Putative uncharacterized protein
Cs7g11415
Cs5g10550	Thaumatin-like protein; Protein P21; Pathogenesis-related protein R major form; Osmotin-like protein OSM34; Osmotin-like protein TPM-1 (Fragment); Osmotin; Zeamatin; Alpha-amylase/trypsin inhibitor; Pathogenesis-related protein R minor form; Thaumatin-2; Pathogenesis-related protein; Thaumatin-1; Glucan endo-1,3-beta-glucosidase; Thaumatin-like protein 1b (Fragment); Pathogenesis-related protein …
Cs5g01440	Hydrolase or acyltransferase (Alpha/beta hydrolase superfamily)-like protein;Putative aminoacrylate hydrolase RutD; Abhydrolase domain-containing protein 4; Haloalkane dehalogenase
Cs9g17380	Putative uncharacterized protein Sb09g022145 (Fragment)
Cs7g02540	Putative uncharacterized protein At2g31120 (Fragment)
Cs8g15600	Putative uncharacterized protein At2g28160 (Fragment);Transcription factor FER-LIKE IRON DEFICIENCY-INDUCED TRANSCRIPTION FACTOR; Transcription factor bHLH35; Transcription factor ABA-INDUCIBLE bHLH-TYPE; Transcription factor ALC; Transcription factor SPATULA; Anthocyanin regulatory Lc protein; Anthocyanin regulatory R-S protein; Transcription factor GLABRA 3
Cs9g06490	Putative uncharacterized protein Sb02g026816;Probable carboxylesterase 12; Gibberellin receptor GID1A; Carboxylesterase 1; Arylacetamide deacetylase; Lipase 2; Hormone-sensitive lipase
Cs3g11790	Progesterone 5-beta-reductase, putative
Cs2g25450	Peroxidase 55; Cationic peroxidase 2; Basic peroxidase;Putative uncharacterized protein Sb02g029340
Cs5g21220	UDP-glycosyltransferase 74F2; Indole-3-acetate beta-glucosyltransferase; Limonoid UDP-glucosyltransferase; Cinnamate beta-D-glucosyltransferase;UDP-glucoronosyl/UDP-glucosyl transferase family protein
Cs5g32150	DNA-damage-repair/toleration protein DRT100; LRR receptor-like serine/threonine-protein kinase ERECTA; Probably inactive leucine-rich repeat receptor-like protein kinase IMK2; LRR receptor-like serine/threonine-protein kinase ERL2; Receptor-like protein 12; Leucine-rich repeat receptor-like serine/threonine-protein kinase BAM1; Leucine-rich repeat receptor-like protein kinase PEPR2; Polygalacturo…
Cs3g18110	UDP-glycosyltransferase 85A2; Cyanohydrin beta-glucosyltransferase; Indole-3-acetate beta-glucosyltransferase;Transcription factor/ transferase, transferring glycosyl groups
Cs8g12630	Putative uncharacterized protein Sb01g019290
orange1.1t03798	Mitogen-activated protein kinase kinase kinase 1; Probable WRKY transcription factor 19; Mitogen-activated protein kinase kinase kinase A; SPS1/STE20-related protein kinase YSK4; Protein kinase byr2; MAP kinase kinase kinase mkh1; Serine/threonine-protein kinase BCK1/SLK1/SSP31; Cytokinesis protein sepH; Serine/threonine-protein kinase sepA; Cell division control protein 7; Probable serine/threon…
Cs5g09980	PGR5-like protein 1A, chloroplastic;cDNA clone:001-038-D09, full insert sequence
Cs3g09160	Putative uncharacterized protein
Cs3g03350	Putative DNA binding protein
Cs2g17860	Histidine kinase 4; Signal transduction histidine-protein kinase BarA; Hybrid signal transduction histidine kinase J; Two-component system protein A; Hybrid signal transduction histidine kinase G; Ethylene receptor 2; Hybrid signal transduction histidine kinase A; Hybrid signal transduction histidine kinase E; Hybrid signal transduction histidine kinase B; Sensory/regulatory protein RpfC; Two-com…
orange1.1t02191	E3 ubiquitin-protein ligase MIB1; Ankyrin repeat-containing protein C6C3.08; E3 ubiquitin-protein ligase mind-bomb;Ankyrin repeat-containing protein, putative
Cs8g08710	Probable fructose-bisphosphate aldolase 2, chloroplastic; Fructose-bisphosphate aldolase, chloroplastic; Fructose-bisphosphate aldolase 1, chloroplastic (Fragment); Fructose-bisphosphate aldolase 2, chloroplastic; Fructose-bisphosphate aldolase, cytoplasmic isozyme; Fructose-bisphosphate aldolase cytoplasmic isozyme; Fructose-bisphosphate aldolase; Fructose-bisphosphate aldolase A; Probable fruct…
orange1.1t02754	Cinnamoyl CoA reductase (Fragment);Bifunctional dihydroflavonol 4-reductase/flavanone 4-reductase; Dihydroflavonol-4-reductase; Dihydroflavonol-4-reductase (Fragment); Anthocyanidin reductase; Putative uncharacterized oxidoreductase C513.07; Aldehyde reductase 2; Putative NADPH-dependent methylglyoxal reductase GRP2
Cs2g14940	Glyceraldehyde-3-phosphate dehydrogenase (NADP+) (Phosphorylating);Glyceraldehyde-3-phosphate dehydrogenase A, chloroplastic; Glyceraldehyde-3-phosphate dehydrogenase A, chloroplastic (Fragment); Glyceraldehyde-3-phosphate dehydrogenase B, chloroplastic (Fragment); Glyceraldehyde-3-phosphate dehydrogenase B, chloroplastic; Glyceraldehyde-3-phosphate dehydrogenase, chloroplastic; Glyceraldehyde-3-…
Cs3g23040
Cs2g31410	Hydroxycinnamoyl CoA shikimate/quinate hydroxycinnamoyltransferase-like protein;Benzyl alcohol O-benzoyltransferase; 13-hydroxylupanine O-tigloyltransferase; (Z)-3-hexen-1-ol acetyltransferase
Cs1g22680	Red chlorophyll catabolite reductase, chloroplast, putative;Red chlorophyll catabolite reductase, chloroplastic; Red chlorophyll catabolite reductase (Fragment)
Cs2g03270	9-cis-epoxycarotenoid dioxygenase NCED1, chloroplastic; Probable 9-cis-epoxycarotenoid dioxygenase NCED5, chloroplastic; Probable carotenoid cleavage dioxygenase 4, chloroplastic; Carotenoid 9,10(9',10')-cleavage dioxygenase; Zeaxanthin 7,8(7',8')-cleavage dioxygenase, chromoplast;9-cis-epoxycarotenoid dioxygenase (Fragment)
Cs4g11610	G-type lectin S-receptor-like serine/threonine-protein kinase At4g27290; Receptor-like serine/threonine-protein kinase SD1-8; G-type lectin S-receptor-like serine/threonine-protein kinase SRK; Putative serine/threonine-protein kinase receptor; Putative G-type lectin S-receptor-like serine/threonine-protein kinase At1g61610; Cysteine-rich receptor-like protein kinase 10; Putative cysteine-rich rec…
orange1.1t02409	UDP-glycosyltransferase 86A1; Hydroquinone glucosyltransferase;UDP-glucoronosyl and UDP-glucosyl transferase family protein, expressed
Cs7g12440	Putative uncharacterized protein
Cs8g17160	Putative uncharacterized protein Sb01g038650;LOB domain-containing protein 11; Protein LATERAL ORGAN BOUNDARIES; Protein IAL1
Cs2g28370	Putative uncharacterized protein Sb02g022230;UDP-glycosyltransferase 90A1; Anthocyanin 3'-O-beta-glucosyltransferase; UDP-glucosyl transferase 73B2; Hydroquinone glucosyltransferase; Anthocyanidin 5,3-O-glucosyltransferase; Zeatin O-glucosyltransferase; Cyanidin-3-O-glucoside 2-O-glucuronosyltransferase; Zeatin O-xylosyltransferase
Cs8g14690	Pollen Ole e 1 allergen and extensin family protein
Cs7g27010	Cytochrome P450 71A1; Cytochrome P450 71A6 (Fragment); Psoralen synthase (Fragment); Psoralen synthase; Premnaspirodiene oxygenase; Amorpha-4,11-diene C-12 oxidase; Indoleacetaldoxime dehydratase; Germacrene A oxidase; Angelicin synthase (Fragment); Tabersonine 16-hydroxylase (Fragment); (+)-menthofuran synthase; 5-epiaristolochene 1,3-dihydroxylase;Tabersonine/lochnericine 19-hydroxylase
Cs9g17780	Predicted protein (Fragment)
Cs3g16430	Branched-chain-amino-acid aminotransferase 2, chloroplastic; Branched-chain-amino-acid aminotransferase 1, mitochondrial; Branched-chain-amino-acid aminotransferase 6; Putative branched-chain-amino-acid aminotransferase 7; Probable branched-chain-amino-acid aminotransferase 4; Branched-chain-amino-acid transaminase 1; Branched-chain-amino-acid aminotransferase, cytosolic; Branched-chain-amino-aci…
Cs6g15150	F-box protein At3g44326; Probable F-box protein At1g60180;Putative uncharacterized protein Sb05g003430
Cs7g22760	Nitrate transporter 1.5; Putative peptide/nitrate transporter At5g19640; Peptide transporter PTR1; Probable peptide/nitrate transporter At1g62200; Probable nitrite transporter At1g68570;Putative uncharacterized protein Sb02g007605 (Fragment)
orange1.1t03042	Tropinone reductase homolog; Tropinone reductase 1; Dehydrogenase/reductase SDR family member 4; 3-oxoacyl-[acyl-carrier-protein] reductase FabG; Gluconate 5-dehydrogenase; Bacilysin biosynthesis oxidoreductase BacC; Uncharacterized short-chain type dehydrogenase/reductase y4vI; Dehydrogenase/reductase SDR family member 4 (Fragment); Glucose 1-dehydrogenase 2; Granaticin polyketide synthase putat…
Cs3g23440	Lipase;Putative uncharacterized protein Sb04g034230
Cs5g21190	Agmatine coumaroyltransferase; Anthocyanin 5-aromatic acyltransferase; Malonyl-coenzyme A:anthocyanin 3-O-glucoside-6''-O-malonyltransferase; Malonyl-coenzyme:anthocyanin 5-O-glucoside-6'''-O-malonyltransferase; BAHD acyltransferase DCR;Anthocyanin 5-aromatic acyltransferase/benzoyltransferase-like protein
Cs8g16290	Phenylalanine ammonia-lyase (Fragment);Phenylalanine ammonia-lyase 1; Phenylalanine ammonia-lyase class 2; Phenylalanine ammonia-lyase G4 (Fragment); Phenylalanine ammonia-lyase class 1 (Fragment)
orange1.1t02977	BAHD acyltransferase At5g47980; Vinorine synthase; Deacetylvindoline O-acetyltransferase; Salutaridinol 7-O-acetyltransferase;3'-N-debenzoyl-2'-deoxytaxol N-benzoyltransferase, putative
Cs4g03740	Peroxidase 16; Peroxidase C1C (Fragment);Putative uncharacterized protein Sb01g007230
Cs6g17360	Leucine-rich repeat receptor-like protein kinase (Fragment);Probable inactive receptor kinase RLK902; Probable leucine-rich repeat receptor-like protein kinase At1g68400; Inactive leucine-rich repeat receptor-like serine/threonine-protein kinase At5g24100; Putative inactive receptor-like protein kinase At1g64210; Probably inactive receptor-like protein kinase At5g41680; Probably inactive leucine-…

## Sheet: Supplemental Table S5
Supplemental Table S5 Gene set 1B
Gene_ID	Annotation
Cs5g29930	Hyoscyamine 6-dioxygenase; 2'-deoxymugineic-acid 2'-dioxygenase; Mugineic-acid 3-dioxygenase; Flavonol synthase/flavanone 3-hydroxylase; Naringenin,2-oxoglutarate 3-dioxygenase; Flavanone 3-dioxygenase; Flavone synthase; Naringenin,2-oxoglutarate 3-dioxygenase (Fragment); Codeine O-demethylase; 1-aminocyclopropane-1-carboxylate oxidase homolog 1; Gibberellin 3-beta-dioxygenase 4; Probable 2-oxogl…
Cs4g07650	Photosystem I reaction center subunit V, chloroplastic; Photosystem I reaction center subunit V (Fragment);Photosystem I reaction center subunit V, chloroplast, putative
Cs5g15530	Terpene synthase-like; Terpenoid synthase (Fragment);Ent-copalyl diphosphate synthase, chloroplastic; Ent-copalyl diphosphate synthase 1, chloroplastic; Syn-copalyl diphosphate synthase; Ent-copalyl diphosphate synthase 2; Levopimaradiene synthase, chloroplastic; Abietadiene synthase, chloroplastic; Isopimaradiene synthase, chloroplastic; Alpha-bisabolene synthase; Taxadiene synthase; (E)-gamma-b…
Cs3g06820	Putative progesterone 5 beta reductase
Cs5g07856	Expansin-like B1; Expansin-B10; Expansin-B1; Expansin-B18; Expansin-B15; Expansin-B7; Expansin-B5; Pollen allergen Phl p 1; Expansin-B4; Expansin-B3; Major pollen allergen Hol l 1; Pollen allergen Lol p 1; Expansin-B2; Expansin-B9; Putative expansin-B2; Expansin-B11; Expansin-B6; Major pollen allergen Pha a 1; Major pollen allergen Cyn d 1; Expansin-B8; Expansin-B12; Expansin-B17; Expansin-B16; E…
Cs2g21470
Cs4g15210	Glucan endo-1,3-beta-glucosidase (Beta 1-3 glucanase) (Fragment);Lichenase; Glucan endo-1,3-beta-glucosidase, basic isoform; Glucan endo-1,3-beta-glucosidase; Glucan endo-1,3-beta-glucosidase, basic vacuolar isoform; Glucan endo-1,3-beta-glucosidase, basic vacuolar isoform GLB; Glucan endo-1,3-beta-glucosidase, basic isoform 1 (Fragment); Glucan endo-1,3-beta-glucosidase B; Glucan endo-1,3-beta-g…
Cs7g14940	Gibberellin 2-beta-dioxygenase 8; Gibberellin 20 oxidase 1-B; 1-aminocyclopropane-1-carboxylate oxidase 4; 1-aminocyclopropane-1-carboxylate oxidase homolog 1; Codeine O-demethylase; Probable 1-aminocyclopropane-1-carboxylate oxidase; S-norcoclaurine synthase 1; Deacetoxyvindoline 4-hydroxylase;2-oxoglutarate-dependent dioxygenase (Fragment)
orange1.1t03382	C-terminal processing peptidase-2, Serine peptidase, MEROPS family S41A (Precursor);Carboxyl-terminal-processing protease; Carboxy-terminal processing protease CtpB; Carboxy-terminal processing protease CtpA; Probable CtpA-like serine protease; Carboxy-terminal-processing protease
orange1.1t03504	Chloroplast chlorophyll a/b-binding protein CP24 (Fragment);Chlorophyll a-b binding protein CP24 10B, chloroplastic; Chlorophyll a-b binding protein, chloroplastic; Chlorophyll a-b binding protein CP29; Chlorophyll a-b binding protein of LHCII type III, chloroplastic; Chlorophyll a-b binding protein 1B-20, chloroplastic (Fragment); Chlorophyll a-b binding protein of LHCII type I, chloroplastic; C…
orange1.1t04609	Putative uncharacterized protein
Cs2g07330	Oxygen-evolving enhancer protein 3, chloroplastic;Photosystem II oxygen-evolving complex protein 3 (Precursor)
Cs5g09860	7-ethoxycoumarin O-deethylase; Cytochrome P450 76C4; Flavonoid 3'-monooxygenase; Cytochrome P450 76A1 (Fragment); Probable (S)-N-methylcoclaurine 3'-hydroxylase isozyme 2; (S)-N-methylcoclaurine 3'-hydroxylase isozyme 1 (Fragment); (S)-N-methylcoclaurine 3'-hydroxylase isozyme 2; Berbamunine synthase; Licodione synthase; 5-epiaristolochene 1,3-dihydroxylase; Premnaspirodiene oxygenase; 4-hydroxyp…
orange1.1t01124	Nodulin MtN21 /EamA-like transporter family protein;Auxin-induced protein 5NG4
Cs7g06840	Putative uncharacterized protein At5g24930 (Fragment);Zinc finger protein CONSTANS-LIKE 4; Zinc finger protein CONSTANS; Zinc finger protein HD1; Probable salt tolerance-like protein At1g78600; Salt tolerance protein; Salt tolerance-like protein; Putative zinc finger protein At1g68190; Protein CHLOROPLAST IMPORT APPARATUS 2; Two-component response regulator-like APRR3
Cs8g20410	Glutamine-dependent asparagine synthetase 1;Asparagine synthetase [glutamine-hydrolyzing]; Asparagine synthetase, root [glutamine-hydrolyzing]; Asparagine synthetase, nodule [glutamine-hydrolyzing]; Probable asparagine synthetase [glutamine-hydrolyzing]; Asparagine synthetase B [glutamine-hydrolyzing]
Cs7g11415
Cs7g10740	Type II chlorophyll a/b binding protein from photosystem I (Precursor);Chlorophyll a-b binding protein, chloroplastic; Chlorophyll a-b binding protein 7, chloroplastic; Chlorophyll a-b binding protein 1B-20, chloroplastic (Fragment); Chlorophyll a-b binding protein type 2 member 1B, chloroplastic; Chlorophyll a-b binding protein of LHCII type I, chloroplastic; Chlorophyll a-b binding protein C, c…
Cs5g10550	Thaumatin-like protein; Protein P21; Pathogenesis-related protein R major form; Osmotin-like protein OSM34; Osmotin-like protein TPM-1 (Fragment); Osmotin; Zeamatin; Alpha-amylase/trypsin inhibitor; Pathogenesis-related protein R minor form; Thaumatin-2; Pathogenesis-related protein; Thaumatin-1; Glucan endo-1,3-beta-glucosidase; Thaumatin-like protein 1b (Fragment); Pathogenesis-related protein …
Cs5g17900	Putative 12-oxophytodienoate reductase 11; 12-oxophytodienoate reductase 2; Putative 12-oxophytodienoate reductase-like protein 2; 12-oxophytodienoate reductase-like protein; N-ethylmaleimide reductase; NADPH dehydrogenase 3; Enoate reductase 1; Probable NADPH dehydrogenase; Putative NADPH dehydrogenase C5H10.04; Bile acid-inducible operon protein CD; NADH oxidase; Probable NADH-dependent flavin …
Cs6g19630	Cytochrome P450 85A; 3-epi-6-deoxocathasterone 23-monooxygenase; Abietadienol/abietadienal oxidase; Abscisic acid 8'-hydroxylase 3; Ent-kaurenoic acid oxidase 2; Leukotriene-B(4) omega-hydroxylase 2;Cytochrome P450 probable 6-deoxocathasterone to 6-deoxoteasterone or cathasterone to teasterone
Cs9g06360	Glucose-1-phosphate adenylyltransferase large subunit 1, chloroplastic; Glucose-1-phosphate adenylyltransferase large subunit 3, chloroplastic/amyloplastic; Glucose-1-phosphate adenylyltransferase large subunit, chloroplastic/amyloplastic; Glucose-1-phosphate adenylyltransferase large subunit 1 (Fragment); Probable glucose-1-phosphate adenylyltransferase large subunit, chloroplastic; Glucose-1-ph…
Cs5g01440	Putative aminoacrylate hydrolase RutD;Alpha/beta hydrolase fold containing protein (Precursor)
Cs1g12430	Palmitoyl-monogalactosyldiacylglycerol delta-7 desaturase, chloroplastic; Probable lipid desaturase ADS3.2, chloroplastic; Delta-9 acyl-lipid desaturase 1; Delta-9 desaturase-like 1 protein; Probable acyl-CoA desaturase; Acyl-CoA desaturase (Fragment); Acyl-CoA desaturase; Stearoyl-CoA desaturase 5;Similar to tr|Q4BXX0|Q4BXX0_CROWT Stearoyl-CoA 9-desaturase
Cs2g09840	Alpha/beta-hydrolase domain-containing protein
Cs9g17380	Putative uncharacterized protein Sb09g022145 (Fragment)
orange1.1t00510	Uncharacterized protein At4g00950;Putative uncharacterized protein (Fragment)
Cs7g02540	Putative uncharacterized protein At2g31120 (Fragment)
Cs4g20420	Putative uncharacterized protein Sb09g029300
Cs5g16860	Anthranilate N-methyltransferase; Caffeic acid 3-O-methyltransferase; Quercetin 3-O-methyltransferase 1; Tricetin 3',4',5'-O-trimethyltransferase; Caffeic acid 3-O-methyltransferase (Fragment); (Iso)eugenol O-methyltransferase; Inositol 4-methyltransferase; Flavone O-methyltransferase 1; Bergaptol O-methyltransferase; (S)-scoulerine 9-O-methyltransferase; Isoliquiritigenin 2'-O-methyltransferase;…
Cs5g10040	Senescence-inducible chloroplast stay-green protein (Fragment)
Cs5g02940	Respiratory burst oxidase homolog protein F; Respiratory burst oxidase homolog protein A; Probable respiratory burst oxidase homolog protein I; Respiratory burst oxidase homolog protein E; Respiratory burst oxidase homolog protein C; Respiratory burst oxidase homolog protein B; Respiratory burst oxidase homolog protein D; Putative respiratory burst oxidase homolog protein G; Putative respiratory …
orange1.1t01192	BAHD acyltransferase At5g47980; Deacetylvindoline O-acetyltransferase; Vinorine synthase; Salutaridinol 7-O-acetyltransferase;3'-N-debenzoyl-2'-deoxytaxol N-benzoyltransferase, putative
Cs1g09140	Photosystem I reaction center subunit N, chloroplastic; Photosystem I reaction center subunit N, chloroplastic (Fragment);Photosystem I reaction center subunit N, chloroplast, putative
Cs2g16120	Putative orcinol O-methyltransferase (Fragment);Myricetin O-methyltransferase; Chavicol O-methyltransferase; Eugenol O-methyltransferase; 8-hydroxyquercetin 8-O-methyltransferase; 6a-hydroxymaackiain methyltransferase 1; Tabersonine 16-O-methyltransferase; Isoflavone 7-O-methyltransferase; Isoflavone-7-O-methyltransferase 8; O-methyltransferase ZRP4; 5-pentadecatrienyl resorcinol O-methyltransfer…
Cs8g15600	Putative uncharacterized protein At2g28160 (Fragment);Transcription factor FER-LIKE IRON DEFICIENCY-INDUCED TRANSCRIPTION FACTOR; Transcription factor bHLH35; Transcription factor ABA-INDUCIBLE bHLH-TYPE; Transcription factor ALC; Transcription factor SPATULA; Anthocyanin regulatory Lc protein; Anthocyanin regulatory R-S protein; Transcription factor GLABRA 3
Cs9g06490	Putative uncharacterized protein Sb02g026816;Probable carboxylesterase 12; Gibberellin receptor GID1A; Carboxylesterase 1; Arylacetamide deacetylase; Lipase 2; Hormone-sensitive lipase
Cs3g19760	IAA-amino acid hydrolase ILR1-like 6; Thermostable carboxypeptidase 2; Uncharacterized hydrolase YtnL; Uncharacterized hydrolase YxeP; Putative amidohydrolase yhaA; Uncharacterized hydrolase sll0100; Hippurate hydrolase; N-acetyldiaminopimelate deacetylase;Putative uncharacterized protein Sb03g032500
Cs7g01700	Carotenoid 9,10(9',10')-cleavage dioxygenase 1; 9-cis-epoxycarotenoid dioxygenase 1, chloroplastic; Probable 9-cis-epoxycarotenoid dioxygenase NCED5, chloroplastic; Probable carotenoid cleavage dioxygenase 4, chloroplastic; Zeaxanthin 7,8(7',8')-cleavage dioxygenase, chromoplast;Putative uncharacterized protein Sb01g047540
Cs3g11790	Progesterone 5-beta-reductase, putative
Cs5g18620	Precursor of CP29, core chlorophyll a/b binding (CAB) protein of photosystem II (PSII);Chlorophyll a-b binding protein CP26, chloroplastic; Chlorophyll a-b binding protein of LHCII type I, chloroplastic; Chlorophyll a-b binding protein type 2 member 1B, chloroplastic; Chlorophyll a-b binding protein, chloroplastic; Chlorophyll a-b binding protein of LHCII type I, chloroplastic (Fragment); Chlorop…
Cs3g23560	Alpha-amylase; Alpha-amylase isozyme 3D; Alpha-amylase type B isozyme; Alpha-amylase type A isozyme; Alpha-amylase type B isozyme (Fragment); Alpha-amylase isozyme C;Pentatricopeptide repeat-containing protein, putative
Cs2g25450	Peroxidase 55; Cationic peroxidase 2; Basic peroxidase;Putative uncharacterized protein Sb02g029340
Cs6g03210	S-norcoclaurine synthase;Pathogenesis-related (PR)-10-related norcoclaurine synthase-like protein
Cs9g16640	UDP-glycosyltransferase 76C4; Cyanohydrin beta-glucosyltransferase; Limonoid UDP-glucosyltransferase; Anthocyanidin 3-O-glucosyltransferase 7 (Fragment); Anthocyanidin 3-O-glucosyltransferase;UDP-glucoronosyl/UDP-glucosyl transferase family protein
Cs5g31180	Photosystem I reaction center subunit II, chloroplastic; Photosystem I reaction center subunit II-2, chloroplastic; Photosystem I reaction center subunit II, cyanelle; Photosystem I reaction center subunit II; Photosystem I reaction center subunit II (Fragment);Chloroplast photosystem I reaction center subunit II-like protein
Cs5g21220	UDP-glycosyltransferase 74F2; Indole-3-acetate beta-glucosyltransferase; Limonoid UDP-glucosyltransferase; Cinnamate beta-D-glucosyltransferase;UDP-glucoronosyl/UDP-glucosyl transferase family protein
Cs7g31010	2-oxoglutarate (2OG) and Fe(II)-dependent oxygenase-like protein;Leucoanthocyanidin dioxygenase; Codeine O-demethylase; Probable 2-oxoglutarate/Fe(II)-dependent dioxygenase; Thebaine 6-O-demethylase; Protein SRG1; Naringenin,2-oxoglutarate 3-dioxygenase; 1-aminocyclopropane-1-carboxylate oxidase 1; Flavonol synthase/flavanone 3-hydroxylase; S-norcoclaurine synthase 1; Probable 1-aminocyclopropane…
Cs5g32150	DNA-damage-repair/toleration protein DRT100; LRR receptor-like serine/threonine-protein kinase ERECTA; Probably inactive leucine-rich repeat receptor-like protein kinase IMK2; LRR receptor-like serine/threonine-protein kinase ERL2; Receptor-like protein 12; Leucine-rich repeat receptor-like serine/threonine-protein kinase BAM1; Leucine-rich repeat receptor-like protein kinase PEPR2; Polygalacturo…
Cs1g04870	FAD binding domain containing protein, expressed
Cs3g18110	UDP-glycosyltransferase 85A2; Cyanohydrin beta-glucosyltransferase; Indole-3-acetate beta-glucosyltransferase;Transcription factor/ transferase, transferring glycosyl groups
Cs4g18090	Putative dicyanin blue copper protein (Precursor);Umecyanin; Blue copper protein; Cucumber peeling cupredoxin; Early nodulin-like protein 1; Stellacyanin; Mavicyanin; Uclacyanin-2; Basic blue protein; Chemocyanin; Lamin-like protein; Early nodulin-55-2; Pollen allergen Amb a 3
Cs2g17130	Putative uncharacterized protein Sb06g019050;Protein PLANT CADMIUM RESISTANCE 2; Cell number regulator 10
Cs1g26340	AMP-dependent synthetase and ligase family protein, putative, expressed
Cs3g27020	Cytokinin riboside 5'-monophosphate phosphoribohydrolase LOG3;Cytokinin riboside 5'-monophosphate phosphoribohydrolase LOG5; Probable cytokinin riboside 5'-monophosphate phosphoribohydrolase LOGL2; Cytokinin riboside 5'-monophosphate phosphoribohydrolase LOG; Putative cytokinin riboside 5'-monophosphate phosphoribohydrolase LOG9; LOG family protein PA4923; LOG family protein yvdD; LOG family prot…
Cs8g12630	Putative uncharacterized protein Sb01g019290
orange1.1t03798	Mitogen-activated protein kinase kinase kinase 1; Probable WRKY transcription factor 19; Mitogen-activated protein kinase kinase kinase A; SPS1/STE20-related protein kinase YSK4; Protein kinase byr2; MAP kinase kinase kinase mkh1; Serine/threonine-protein kinase BCK1/SLK1/SSP31; Cytokinesis protein sepH; Serine/threonine-protein kinase sepA; Cell division control protein 7; Probable serine/threon…
Cs3g01120	Ferric reductase like transmembrane component;Ferric reduction oxidase 6; Ferric reduction oxidase 7, chloroplastic; Probable ferric reduction oxidase 1; Ferric reduction oxidase 3, mitochondrial; Respiratory burst oxidase homolog protein E; Superoxide-generating NADPH oxidase heavy chain subunit C; Respiratory burst oxidase homolog protein A; Respiratory burst oxidase homolog protein C; Probable…
orange1.1t00611	Glucose-1-phosphate adenylyltransferase large subunit 2, chloroplastic; Glucose-1-phosphate adenylyltransferase large subunit, chloroplastic/amyloplastic; Glucose-1-phosphate adenylyltransferase large subunit 2, chloroplastic/amyloplastic; Glucose-1-phosphate adenylyltransferase large subunit 1 (Fragment); Probable glucose-1-phosphate adenylyltransferase large subunit, chloroplastic; Glucose-1-ph…
Cs7g27290	Light-harvesting chlorophyll-a/b binding protein Lhca6 (Fragment);Chlorophyll a-b binding protein 6A, chloroplastic; Chlorophyll a-b binding protein 1B-20, chloroplastic (Fragment); Chlorophyll a-b binding protein, chloroplastic; Chlorophyll a-b binding protein type 2 member 1B, chloroplastic; Chlorophyll a-b binding protein E, chloroplastic; Chlorophyll a-b binding protein C, chloroplastic; Chlo…
Cs4g07930	Subtilisin-like serine protease AIR3 (Fragment);Subtilisin-like protease; Cucumisin; Xylem serine proteinase 1; Minor extracellular protease vpr; Serine protease AprX; Major intracellular serine protease
Cs1g21000	Transcription factor bHLH25; Anthocyanin regulatory R-S protein; Transcription factor ABA-INDUCIBLE bHLH-TYPE; Anthocyanin regulatory Lc protein; Transcription factor GLABRA 3; Transcription factor ABORTED MICROSPORES; Transcription factor ALC; Transcription factor SPATULA; Transcription factor FER-LIKE IRON DEFICIENCY-INDUCED TRANSCRIPTION FACTOR;Helix-loop-helix DNA-binding domain containing pr…
Cs6g07400	Laccase-7; Laccase-9; Laccase-8; Laccase-24; Laccase-12; Laccase-3; Laccase-25; Laccase-5; Laccase-14; Laccase-6; Laccase-23; Putative laccase-17; Laccase-13; Laccase-12/13; Laccase-4; Laccase-2; Laccase-11; Laccase-17; Laccase-10; Laccase-1; Laccase-15; Laccase-19; Laccase-22; Laccase-16; Laccase-20; Laccase-21; Laccase-18; L-ascorbate oxidase;Putative uncharacterized protein Sb03g038550
Cs8g08820	Putative uncharacterized protein (Fragment);Aquaporin-4; Aquaporin PIP1.1; Probable aquaporin PIP2-6; Aquaporin AQPAn.G; Aquaporin AQPcic; Aquaporin-1; Lens fiber major intrinsic protein; Aquaporin FA-CHIP
Cs5g09980	PGR5-like protein 1A, chloroplastic;cDNA clone:001-038-D09, full insert sequence
orange1.1t00666
Cs7g31190	Light-harvesting chlorophyll-a/b binding protein Lhcb4 (Fragment);Chlorophyll a-b binding protein CP29.3, chloroplastic; Chlorophyll a-b binding protein CP29; Chlorophyll a-b binding protein, chloroplastic; Chlorophyll a-b binding protein of LHCII type I, chloroplastic; Chlorophyll a-b binding protein type 2 member 1B, chloroplastic; Chlorophyll a-b binding protein 5, chloroplastic (Fragment); Ch…
Cs4g11440	G-type lectin S-receptor-like serine/threonine-protein kinase At4g27290; S-locus-specific glycoprotein S13; Receptor-like serine/threonine-protein kinase SD1-6; G-type lectin S-receptor-like serine/threonine-protein kinase SRK; Putative inactive G-type lectin S-receptor-like serine/threonine-protein kinase SRK; Putative serine/threonine-protein kinase receptor; Putative G-type lectin S-receptor-l…
Cs7g16680	Uncharacterized plant-specific domain TIGR01615 family protein
Cs6g12830	Probable LRR receptor-like serine/threonine-protein kinase At4g08850; Probable leucine-rich repeat receptor-like protein kinase At1g35710; Leucine-rich repeat receptor-like serine/threonine-protein kinase At1g17230; LRR receptor-like serine/threonine-protein kinase GSO2; Receptor-like protein kinase 2; Leucine-rich repeat receptor-like protein kinase PXL2; LRR receptor-like serine/threonine-prote…
Cs3g18330	Putative uncharacterized protein Sb01g044450
Cs5g11630	Glucosyl/glucuronosyl transferases, putative;UDP-glycosyltransferase 83A1; Cyanohydrin beta-glucosyltransferase; Limonoid UDP-glucosyltransferase
Cs8g05940	Abscisic acid 8'-hydroxylase 4; Cytochrome P450 716B1; Ent-kaurenoic acid oxidase 1; Taxane 13-alpha-hydroxylase; 3-epi-6-deoxocathasterone 23-monooxygenase;Putative uncharacterized protein Sb02g026600
Cs2g24030	Putative uncharacterized protein Sb01g010420;Protein CHLOROPLAST IMPORT APPARATUS 2; Zinc finger protein CONSTANS-LIKE 16; Zinc finger protein HD1; Two-component response regulator-like APRR9; Zinc finger protein CONSTANS
Cs9g17670	Short-chain dehydrogenase TIC 32, chloroplastic; WW domain-containing oxidoreductase; Retinol dehydrogenase 11; Dehydrogenase/reductase SDR family member on chromosome X homolog; Dehydrogenase/reductase SDR family member on chromosome X; Uncharacterized oxidoreductase C736.13; Dehydrogenase/reductase SDR family member 13; Probable oxidoreductase; Protochlorophyllide reductase B, chloroplastic; Pr…
Cs3g09160	Putative uncharacterized protein
Cs5g28730	2-oxoglutarate (2OG) and Fe(II)-dependent oxygenase-like protein;1-aminocyclopropane-1-carboxylate oxidase homolog 11; Flavonol synthase/flavanone 3-hydroxylase; Thebaine 6-O-demethylase; Gibberellin 20 oxidase 1; Flavanone 3-dioxygenase; Naringenin,2-oxoglutarate 3-dioxygenase; Codeine O-demethylase; Protein SRG1; Probable 2-oxoglutarate/Fe(II)-dependent dioxygenase; Naringenin,2-oxoglutarate 3-…
Cs9g06150	Basic 7S globulin;Xyloglucan-specific fungal endoglucanase inhibitor protein
Cs5g32090	Sugar transporter ERD6-like 7; Putative sugar transporter ERD6-like 13; Plastidic glucose transporter 4; Facilitated trehalose transporter Tret1; Solute carrier family 2, facilitated glucose transporter member 6; Facilitated trehalose transporter Tret1-2 homolog; Probable metabolite transport protein CsbC; Putative metabolite transport protein ywtG; Arabinose-proton symporter; Myo-inositol transp…
Cs3g03350	Putative DNA binding protein
Cs9g11040	ABC transporter B family member 19; Putative multidrug resistance protein; Multidrug resistance protein 1; Putative ABC transporter B family member 8; Bile salt export pump; Multidrug resistance protein homolog 49; ATP-binding cassette sub-family B member 5; Leptomycin B resistance protein pmd1;ATP-binding cassette transporter, subfamily B, member 16, group MDR/PGP protein PpABCB16
orange1.1t03155
Cs6g18850	Predicted inosine-uridine preferring nucleoside hydrolase (ISS);Rhomboid protease gluP; Putative rhomboid protease ydcA; Rhomboid-like protease 2
Cs9g06870	40S ribosomal protein S24-2; 30S ribosomal protein S24e;Component of cytosolic 80S ribosome and 40S small subunit
Cs2g17860	Histidine kinase 4; Signal transduction histidine-protein kinase BarA; Hybrid signal transduction histidine kinase J; Two-component system protein A; Hybrid signal transduction histidine kinase G; Ethylene receptor 2; Hybrid signal transduction histidine kinase A; Hybrid signal transduction histidine kinase E; Hybrid signal transduction histidine kinase B; Sensory/regulatory protein RpfC; Two-com…
orange1.1t02191	E3 ubiquitin-protein ligase MIB1; Ankyrin repeat-containing protein C6C3.08; E3 ubiquitin-protein ligase mind-bomb;Ankyrin repeat-containing protein, putative
Cs2g29780	Hydroxycinnamoyl CoA shikimate/quinate hydroxycinnamoyltransferase-like protein;Benzyl alcohol O-benzoyltransferase; 13-hydroxylupanine O-tigloyltransferase; (Z)-3-hexen-1-ol acetyltransferase; Omega-hydroxypalmitate O-feruloyl transferase; Taxadien-5-alpha-ol O-acetyltransferase; 10-deacetylbaccatin III 10-O-acetyltransferase
Cs2g03950	Glucan endo-1,3-beta-glucosidase 1; Glucan endo-1,3-beta-glucosidase-like protein 2; Probable glucan endo-1,3-beta-glucosidase A6;Putative uncharacterized protein Sb05g002745 (Fragment)
Cs8g08710	Probable fructose-bisphosphate aldolase 2, chloroplastic; Fructose-bisphosphate aldolase, chloroplastic; Fructose-bisphosphate aldolase 1, chloroplastic (Fragment); Fructose-bisphosphate aldolase 2, chloroplastic; Fructose-bisphosphate aldolase, cytoplasmic isozyme; Fructose-bisphosphate aldolase cytoplasmic isozyme; Fructose-bisphosphate aldolase; Fructose-bisphosphate aldolase A; Fructose-bisph…
Cs8g14600	Putative uncharacterized protein Sb0067s002250
Cs3g05310	Putative uncharacterized protein;Cytochrome P450 82C4; Cytochrome P450 82A1 (Fragment); Flavonoid 3'-monooxygenase; Isoflavone 2'-hydroxylase; Beta-amyrin 24-hydroxylase; Psoralen synthase (Fragment); (+)-menthofuran synthase; Psoralen synthase; Premnaspirodiene oxygenase; Germacrene A oxidase; Licodione synthase
Cs1g07380	Concanavalin A-like lectin kinase-like protein;L-type lectin-domain containing receptor kinase VII.1; Probable L-type lectin-domain containing receptor kinase VII.2; Putative inactive L-type lectin-domain containing receptor kinase III.2; Probable inactive L-type lectin-domain containing receptor kinase III.1; Putative L-type lectin-domain containing receptor kinase I.10; Lectin-domain containing…
Cs3g22170	Putative uncharacterized protein;Laccase-15; Laccase-14; Putative laccase-9; Laccase-21; Laccase-12; Laccase-3; Laccase-5; Laccase-2; Laccase-23; Laccase-11; Laccase-4; Laccase-12/13; Laccase-16; Laccase-13; Laccase-22; Laccase-1; Laccase-17; Laccase-7; Laccase-10; Laccase-24; Laccase-6; Laccase-25; Laccase-9; Laccase-8; Laccase-19; Laccase-20; Laccase-18; L-ascorbate oxidase
Cs6g11920	Multiple C2 and transmembrane domain-containing protein 1;Calcium-dependent lipid-binding domain-containing protein
orange1.1t02754	Cinnamoyl-CoA reductase, putative;Dihydroflavonol-4-reductase; Bifunctional dihydroflavonol 4-reductase/flavanone 4-reductase; Dihydroflavonol-4-reductase (Fragment); Anthocyanidin reductase; Aldehyde reductase 2; Putative NADPH-dependent methylglyoxal reductase GRP2
Cs3g14610	Pectin methyl-esterase PER (Precursor);Putative pectinesterase/pectinesterase inhibitor 28; Probable pectinesterase/pectinesterase inhibitor 21; Pectinesterase/pectinesterase inhibitor; Pectinesterase 3
orange1.1t03183	Putative uncharacterized protein OJ1521_G01.3
Cs8g03230	Malate dehydrogenase, glyoxysomal; Probable malate dehydrogenase, glyoxysomal; Malate dehydrogenase 1, glyoxysomal; Malate dehydrogenase, mitochondrial; Malate dehydrogenase 1, mitochondrial; Malate dehydrogenase, chloroplastic; Probable malate dehydrogenase, mitochondrial; Malate dehydrogenase;Glyoxisomal malate dehydrogenase
Cs9g09720	Putative uncharacterized protein Sb04g026350
Cs7g29570	Probable WRKY transcription factor 70; WRKY transcription factor 55; Protein WRKY1;WRKY74-superfamily of TFs having WRKY and zinc finger domains
Cs5g17950	Putative uncharacterized protein Sb03g033460;GDSL esterase/lipase At1g71691; GDSL esterase/lipase APG
Cs3g18710	Putative uncharacterized protein (Fragment)
Cs7g05970	Putative uncharacterized protein At1g15800
Cs2g14940	Glyceraldehyde-3-phosphate dehydrogenase (NADP+) (Phosphorylating);Glyceraldehyde-3-phosphate dehydrogenase A, chloroplastic; Glyceraldehyde-3-phosphate dehydrogenase A, chloroplastic (Fragment); Glyceraldehyde-3-phosphate dehydrogenase B, chloroplastic (Fragment); Glyceraldehyde-3-phosphate dehydrogenase B, chloroplastic; Glyceraldehyde-3-phosphate dehydrogenase, chloroplastic; Glyceraldehyde-3-…
Cs5g34450	Photosystem I reaction center subunit IV A, chloroplastic; Photosystem I reaction center subunit IV B, chloroplastic; Photosystem I reaction center subunit IV, chloroplastic; Photosystem I reaction center subunit IV;Photosystem I reaction center subunit IV B, chloroplast (PSI-E B)
Cs3g23040
Cs5g28560	Cytochrome b6f complex subunit, putative, expressed
Cs8g14700	NAC domain-containing protein 90; Putative NAC domain-containing protein 61; Protein SOMBRERO; Protein CUP-SHAPED COTYLEDON 3; Protein FEZ; Protein ATAF2;NAC-domain containing protein 90, putative, expressed
Cs2g31410	Hydroxycinnamoyl CoA shikimate/quinate hydroxycinnamoyltransferase-like protein;Benzyl alcohol O-benzoyltransferase; 13-hydroxylupanine O-tigloyltransferase; (Z)-3-hexen-1-ol acetyltransferase
Cs7g15480	Cytochrome P450 89A2; Cytochrome P450 77A1 (Fragment); 5-epiaristolochene 1,3-dihydroxylase; Tabersonine 16-hydroxylase (Fragment); Psoralen synthase;Cytochrome P450, family 87, subfamily A, polypeptide 6
Cs1g15170	Photosystem I reaction center subunit VI, chloroplastic; Photosystem I reaction center subunit VI-1, chloroplastic; Photosystem I reaction center subunit VI (Fragment);Photosystem I reaction center subunit VI, chloroplast, putative
Cs5g02310	Probable protein phosphatase 2C 8; Protein phosphatase 2C 3; Protein phosphatase 2C homolog 3;Putative uncharacterized protein Sb01g039890
Cs2g03080	ATP synthase gamma chain, chloroplastic; ATP synthase gamma chain 1, chloroplastic; ATP synthase subunit gamma, chloroplastic; ATP synthase gamma chain; ATP synthase subunit gamma, chloroplastic (Fragment);ATP synthase gamma chain (Fragment)
Cs1g14920	Serine/threonine-protein kinase PBS1, putative;G-type lectin S-receptor-like serine/threonine-protein kinase CES101; Receptor-like serine/threonine-protein kinase SD1-6; Cysteine-rich receptor-like protein kinase 17; Putative G-type lectin S-receptor-like serine/threonine-protein kinase At1g61610; Putative cysteine-rich receptor-like protein kinase 12; Putative serine/threonine-protein kinase rec…
Cs8g21070	Putative uncharacterized protein OJ1215_E11.22
orange1.1t02800	Vinorine synthase; Salutaridinol 7-O-acetyltransferase; Deacetylvindoline O-acetyltransferase; BAHD acyltransferase At5g47980;3'-N-debenzoyl-2'-deoxytaxol N-benzoyltransferase, putative
Cs7g26690	Putative uncharacterized protein At1g73870 (Fragment);Zinc finger protein CONSTANS-LIKE 16; Protein CHLOROPLAST IMPORT APPARATUS 2; Zinc finger protein HD1; Zinc finger protein CONSTANS; Two-component response regulator-like APRR7; Probable salt tolerance-like protein At1g75540; Putative zinc finger protein At1g68190; Salt tolerance-like protein
Cs3g16650	MATE efflux family protein DTX1; Multidrug and toxin extrusion protein 1;Putative uncharacterized protein Sb01g031150
Cs7g22860	Precursor of carboxylase h-protein 3, glycine decarboxylase complex;Glycine cleavage system H protein, mitochondrial; Probable glycine cleavage system H protein 2, mitochondrial; Glycine cleavage system H protein, mitochondrial (Fragment); Glycine cleavage system H protein 1, mitochondrial; Glycine cleavage system H protein; Putative glycine cleavage system H protein, mitochondrial
Cs2g09520	Photosystem I reaction center subunit psaK, chloroplast, putative;Photosystem I reaction center subunit psaK, chloroplastic; Photosystem I reaction center subunit psaK, chloroplastic (Fragment)
Cs1g22680	Red chlorophyll catabolite reductase, chloroplast, putative;Red chlorophyll catabolite reductase, chloroplastic; Red chlorophyll catabolite reductase (Fragment)
Cs5g12900	(-)-germacrene D synthase; (E)-beta-farnesene synthase; Valencene synthase; (+)-delta-cadinene synthase isozyme C2; (+)-delta-cadinene synthase isozyme A; (+)-delta-cadinene synthase; Pinene synthase; (E,E)-germacrene B synthase; Beta-caryophyllene synthase; Germacrene C synthase; Vetispiradiene synthase 1; Probable 5-epi-aristolochene synthase 4; 5-epi-aristolochene synthase; 5-epiaristolochene …
Cs6g09810	Putative uncharacterized protein At2g38500
Cs4g06950	Dimethylaniline monooxygenase, putative, expressed;Probable flavin-containing monooxygenase 1; Putative flavin-containing monooxygenase 2; Dimethylaniline monooxygenase [N-oxide-forming] 3; Flavin-containing monooxygenase YUCCA1
Cs3g01585
Cs5g25900	Putative cytochrome P450 monooxygenase (Fragment);Cytochrome P450 71B23; Bifunctional dihydrocamalexate synthase/camalexin synthase; 4-hydroxyphenylacetaldehyde oxime monooxygenase; 2-methylbutanal oxime monooxygenase; Germacrene A oxidase; Premnaspirodiene oxygenase
Cs3g20970	Putative uncharacterized protein Sb03g033680;Pathogen-related protein
Cs3g18660	Low affinity sulfate transporter 3; Sulfate transporter 2.1; High affinity sulfate transporter 1; Probable sulfate transporter 3.4; Early nodulin-70; Sulfate transporter 4.1, chloroplastic; Sulfate permease 2; Sodium-independent sulfate anion transporter;High affinity sulfate transporter SAT-1, Sulfate/bicarbonate/oxalate exchanger SLC26 family protein
Cs7g30610	Chromosome undetermined SCAF14784, whole genome shotgun sequence. (Fragment);Cytosolic endo-beta-N-acetylglucosaminidase
Cs4g07940	Protein binding protein, putative (Fragment);BTB/POZ domain-containing protein At1g55760; TD and POZ domain-containing protein 1; Protein maternal effect lethal 26; BTB and MATH domain-containing protein 42; Speckle-type POZ protein-like A; Speckle-type POZ protein; Speckle-type POZ protein B; Speckle-type POZ protein A; Speckle-type POZ protein-like B; BTB/POZ and MATH domain-containing protein …
Cs5g25950	Cytochrome P450-dependent monooxygenase-like protein;Cytochrome P450 83B1; 2-methylbutanal oxime monooxygenase; 4-hydroxyphenylacetaldehyde oxime monooxygenase; Bifunctional dihydrocamalexate synthase/camalexin synthase; Cytochrome P450 71D11 (Fragment); 5-epiaristolochene 1,3-dihydroxylase; Premnaspirodiene oxygenase; Germacrene A oxidase
Cs2g17870	Zinc finger protein 4; Zinc finger protein KNUCKLES;Putative uncharacterized protein Sb01g041490
Cs2g19680	Chlorophyll a-b binding protein 151, chloroplastic; Chlorophyll a-b binding protein of LHCII type I, chloroplastic; Chlorophyll a-b binding protein, chloroplastic; Chlorophyll a-b binding protein type I, chloroplastic; Chlorophyll a-b binding protein 5, chloroplastic (Fragment); Chlorophyll a-b binding protein type 1 member F3, chloroplastic; Chlorophyll a-b binding protein C, chloroplastic; Chlo…
Cs4g02940	Transferase, transferring glycosyl groups, putative;Uncharacterized protein At4g14100
Cs5g22660	Tetrapyrrole-binding protein, chloroplast, putative;Tetrapyrrole-binding protein, chloroplastic; Uncharacterized protein ycf53; Ycf53-like protein
Cs6g12870	Vinorine synthase; Salutaridinol 7-O-acetyltransferase; BAHD acyltransferase At5g47980;3'-N-debenzoyl-2'-deoxytaxol N-benzoyltransferase, putative
Cs2g03270	9-cis-epoxycarotenoid dioxygenase NCED1, chloroplastic; Probable 9-cis-epoxycarotenoid dioxygenase NCED5, chloroplastic; Probable carotenoid cleavage dioxygenase 4, chloroplastic; Carotenoid 9,10(9',10')-cleavage dioxygenase; Zeaxanthin 7,8(7',8')-cleavage dioxygenase, chromoplast;9-cis-epoxycarotenoid dioxygenase (Fragment)
Cs5g34060	Putative yeast pheromone receptor protein AR781
Cs4g11610	G-type lectin S-receptor-like serine/threonine-protein kinase At4g27290; Receptor-like serine/threonine-protein kinase SD1-8; G-type lectin S-receptor-like serine/threonine-protein kinase SRK; Putative serine/threonine-protein kinase receptor; Putative G-type lectin S-receptor-like serine/threonine-protein kinase At1g61610; Cysteine-rich receptor-like protein kinase 10; Putative cysteine-rich rec…
orange1.1t02409	UDP-glycosyltransferase 86A1; Hydroquinone glucosyltransferase;UDP-glucoronosyl and UDP-glucosyl transferase family protein, expressed
Cs7g12440	Putative uncharacterized protein
Cs8g17160	Putative uncharacterized protein Sb01g038650;LOB domain-containing protein 11; Protein LATERAL ORGAN BOUNDARIES; Protein IAL1
Cs3g17390	Probable mitochondrial 2-oxoglutarate/malate carrier protein; Mitochondrial 2-oxoglutarate/malate carrier protein; Kidney mitochondrial carrier protein 1; Brain mitochondrial carrier protein 1; Mitochondrial dicarboxylate carrier; Mitochondrial substrate carrier family protein ucpB; Mitochondrial uncoupling protein 3; Mitochondrial dicarboxylate transporter; Mitochondrial brown fat uncoupling pro…
Cs3g26690	CDSP32 protein (Chloroplast Drought-induced Stress Protein of 32kDa);Thioredoxin-like protein CDSP32, chloroplastic; Thioredoxin H2-1; Thioredoxin H-type 2; Thioredoxin-2; TPR repeat-containing thioredoxin TDX; Thioredoxin-T; Thioredoxin-like 2, chloroplastic
orange1.1t00472	Probable WRKY transcription factor 46; WRKY transcription factor 55; Protein WRKY1;Putative WRKY transcription factor 30 (Fragment)
Cs7g22980	Protein LOL1;Charged multivesicular body protein 2b-B, putative
Cs2g28370	Putative uncharacterized protein Sb02g022230;UDP-glycosyltransferase 90A1; Anthocyanin 3'-O-beta-glucosyltransferase; UDP-glucosyl transferase 73B2; Hydroquinone glucosyltransferase; Anthocyanidin 5,3-O-glucosyltransferase; Zeatin O-glucosyltransferase; Cyanidin-3-O-glucoside 2-O-glucuronosyltransferase; Zeatin O-xylosyltransferase
Cs8g02840	Putative uncharacterized protein Sb02g031140
Cs5g30790	Chlorophyllase-1, chloroplastic; Chlorophyllase-1; Chlorophyllase-2, chloroplastic; Chlorophyllase type 0;Putative uncharacterized protein Sb01g021520
Cs5g08640	Inositol 2-dehydrogenase; Putative oxidoreductase yteT;Oxidoreductase family, NAD-binding Rossmann fold protein
Cs6g16200	Magnesium-protoporphyrin IX monomethyl ester [oxidative] cyclase, chloroplast, putative;Magnesium-protoporphyrin IX monomethyl ester [oxidative] cyclase, chloroplastic; Magnesium-protoporphyrin IX monomethyl ester [oxidative] cyclase 2, chloroplastic; Magnesium-protoporphyrin IX monomethyl ester [oxidative] cyclase 3; Aerobic magnesium-protoporphyrin IX monomethyl ester [oxidative] cyclase
Cs9g03000	Protochlorophyllide-dependent translocon component 52, chloroplastic; Pheophorbide a oxygenase, chloroplastic;Pheophorbide a oxygenase, chloroplast, putative, expressed
Cs8g14690	Pollen Ole e 1 allergen and extensin family protein
Cs2g07700	Tryptophan synthase beta chain 2, chloroplastic; Tryptophan synthase beta chain 2, chloroplastic (Fragment); Tryptophan synthase beta chain 1 (Fragment); Tryptophan synthase beta chain;Putative uncharacterized protein Sb07g002770
Cs4g14590	HSF-type DNA-binding domain containing protein, expressed;Heat stress transcription factor A-2; Heat shock factor protein HSF30; Putative heat stress transcription factor A-6a
Cs1g18450	ATP-binding cassette transporter, subfamily C, member 12, group MRP protein PpABCC12;ABC transporter C family member 8; Putative ABC transporter C family member 15; Canalicular multispecific organic anion transporter 1; Multidrug resistance-associated protein 1; ATP-binding cassette transporter abc2; ATP-binding cassette sub-family C member 11; Uncharacterized ABC transporter ATP-binding protein/…
Cs7g27010	Cytochrome P450 71A1; Cytochrome P450 71A6 (Fragment); Psoralen synthase (Fragment); Psoralen synthase; Premnaspirodiene oxygenase; Amorpha-4,11-diene C-12 oxidase; Indoleacetaldoxime dehydratase; Germacrene A oxidase; Angelicin synthase (Fragment); Tabersonine 16-hydroxylase (Fragment); (+)-menthofuran synthase; 5-epiaristolochene 1,3-dihydroxylase;Tabersonine/lochnericine 19-hydroxylase
Cs7g07120	Probable sarcosine oxidase; Peroxisomal sarcosine oxidase; Monomeric sarcosine oxidase;Putative uncharacterized protein DKFZp469L1823
Cs3g01530	Methionine S-methyltransferase;SAM (And some other nucleotide) binding motif
Cs5g21250	Anthocyanin 5-aromatic acyltransferase/benzoyltransferase-like protein;Agmatine coumaroyltransferase; Anthocyanin 5-aromatic acyltransferase; Malonyl-coenzyme A:anthocyanin 3-O-glucoside-6''-O-malonyltransferase; Malonyl-coenzyme:anthocyanin 5-O-glucoside-6'''-O-malonyltransferase
Cs3g10250	Putative uncharacterized protein At3g01630 (Fragment)
Cs6g16780	Thylakoid lumenal 29.8 kDa protein, chloroplast, putative;PsbP domain-containing protein 6, chloroplastic
Cs1g06850	Light dependent NADH:protochlorophyllide oxidoreductase 2 (Fragment);Protochlorophyllide reductase, chloroplastic; Protochlorophyllide reductase A, chloroplastic; Protochlorophyllide reductase B, chloroplastic; Protochlorophyllide reductase C, chloroplastic; Protochlorophyllide reductase (Fragment); Light-dependent protochlorophyllide reductase; WW domain-containing oxidoreductase; Retinol dehydr…
Cs9g18780	UDP-glucose: anthocyanidin 5,3-O-glucosyltransferase;Anthocyanidin 5,3-O-glucosyltransferase; UDP-glycosyltransferase 88A1; Baicalein 7-O-glucuronosyltransferase; Hydroquinone glucosyltransferase; Anthocyanidin 3-O-glucosyltransferase 2 (Fragment); Zeatin O-xylosyltransferase; UDP-glucosyl transferase 73B2; Zeatin O-glucosyltransferase; Anthocyanin 3'-O-beta-glucosyltransferase; Cinnamate beta-D-…
Cs9g17780	Predicted protein (Fragment)
Cs5g30850	Sulfate transporter 3.1; Probable sulfate transporter 3.4; High affinity sulfate transporter 2; Low affinity sulfate transporter 3; Sulfate transporter 4.1, chloroplastic; Early nodulin-70; Sulfate permease 2; Sodium-independent sulfate anion transporter;Sulfate/bicarbonate/oxalate exchanger and transporter sat-1
orange1.1t03827	Probable glycosyltransferase At5g03795; Xylogalacturonan beta-1,3-xylosyltransferase; Exostosin-2;Putative uncharacterized protein At5g11610/F15N18_200
Cs5g25690	Putative germin E protein (Fragment);Germin-like protein subfamily 1 member 13; Putative germin-like protein subfamily 1 member 2; Germin-like protein; Putative germin-like protein 2-3; Probable germin-like protein subfamily 2 member 5; Nectarin-1
Cs1g02750	Fatty acid hydroxylase domain containing CER1-like protein;Protein WAX2
Cs6g01980	Putative isopenicillin N epimerase, identical
Cs3g07240	Protein PAM68, chloroplastic; Uncharacterized protein PAM68-like;ABC-type Co2+ transport system, permease component
Cs8g09780	Cytochrome P450, family 76, subfamily C, polypeptide 6;Cytochrome P450 76C4; 7-ethoxycoumarin O-deethylase; Probable (S)-N-methylcoclaurine 3'-hydroxylase isozyme 2; Flavonoid 3'-monooxygenase; (S)-N-methylcoclaurine 3'-hydroxylase isozyme 1 (Fragment); (S)-N-methylcoclaurine 3'-hydroxylase isozyme 2; Cytochrome P450 76A1 (Fragment); Berbamunine synthase; Premnaspirodiene oxygenase; Germacrene A …
Cs7g08730	Protein disulfide isomerase (PDI)-like protein 1;Probable nucleoredoxin 1; Nucleoredoxin; Tryparedoxin; Nucleoredoxin-like protein 2; Thiol-disulfide oxidoreductase resA
Cs3g16430	Branched-chain-amino-acid aminotransferase 2, chloroplastic; Branched-chain-amino-acid aminotransferase 1, mitochondrial; Branched-chain-amino-acid aminotransferase 6; Putative branched-chain-amino-acid aminotransferase 7; Probable branched-chain-amino-acid aminotransferase 4; Branched-chain-amino-acid transaminase 1; Branched-chain-amino-acid aminotransferase, cytosolic; Branched-chain-amino-aci…
Cs9g06660	Photosystem I reaction center subunit II, chloroplastic; Photosystem I reaction center subunit II-2, chloroplastic; Photosystem I reaction center subunit II, cyanelle; Photosystem I reaction center subunit II; Photosystem I reaction center subunit II (Fragment);Chloroplast photosystem I reaction center subunit II-like protein
Cs3g02330	Pentatricopeptide repeat-containing protein At5g13770, chloroplastic;Pentatricopeptide repeat-containing protein, putative
Cs4g17630	F-box/kelch-repeat protein At1g55270; Ring canal kelch protein; Ring canal kelch homolog; Kelch-like protein diablo; Kelch-like protein 2;Kelch repeat-containing F-box family protein
Cs2g10540	Leucine-rich repeat receptor-like protein kinase (Fragment);Probable LRR receptor-like serine/threonine-protein kinase At1g56130; Probable leucine-rich repeat receptor-like serine/threonine-protein kinase At3g14840; Cysteine-rich receptor-like protein kinase 3; G-type lectin S-receptor-like serine/threonine-protein kinase B120; Putative G-type lectin S-receptor-like serine/threonine-protein kinas…
Cs6g15150	F-box protein At3g44326; Probable F-box protein At1g60180;Putative uncharacterized protein Sb05g003430
Cs2g01150	Putative uncharacterized protein B1153F04.33;Putative UPF0481 protein At3g02645
orange1.1t03773	Linoleate 13S-lipoxygenase 2-1, chloroplastic; Lipoxygenase 2, chloroplastic; Probable lipoxygenase 8, chloroplastic; Lipoxygenase 6, choloroplastic; Probable lipoxygenase 6; Putative lipoxygenase 5; Linoleate 9S-lipoxygenase 1; Linoleate 9S-lipoxygenase 6 (Fragment); Probable linoleate 9S-lipoxygenase 4; Linoleate 9S-lipoxygenase A; Seed linoleate 9S-lipoxygenase; Putative linoleate 9S-lipoxygen…
Cs5g05240	Putative mitochondrial aldehyde dehydrogenase ALDH2a;Aldehyde dehydrogenase family 2 member B4, mitochondrial; Aldehyde dehydrogenase, mitochondrial; Retinal dehydrogenase 2; Aldehyde dehydrogenase X, mitochondrial; Aldehyde dehydrogenase, cytosolic 1; Aldehyde dehydrogenase family 2 member C4; Aldehyde dehydrogenase; Putative aldehyde dehydrogenase-like protein C9E9.09c; Omega-crystallin; Aldehy…
Cs9g16960	Putative uncharacterized protein At5g07240 (Fragment)
Cs2g28870	Probable peptide/nitrate transporter At5g14940; Putative peptide/nitrate transporter At3g01350; Peptide transporter PTR1; Nitrate transporter 1.5; Probable nitrite transporter At1g68570;Proton-dependent oligopeptide transport family protein
Cs7g22760	Nitrate transporter 1.5; Putative peptide/nitrate transporter At5g19640; Peptide transporter PTR1; Probable peptide/nitrate transporter At1g62200; Probable nitrite transporter At1g68570;Putative uncharacterized protein Sb02g007605 (Fragment)
Cs3g26760	Glutathione S-transferase, C-terminal domain containing protein, expressed;Glutathione S-transferase; Glutathione S-transferase F8, chloroplastic; Glutathione S-transferase PARB; Glutathione S-transferase APIC; Probable glutathione S-transferase GSTF2; Protein gstA; Elongation factor 1-gamma; Glutathione S-transferase A
Cs6g20290	ABC transporter B family member 15; Putative multidrug resistance protein; Putative ABC transporter B family member 8; Multidrug resistance protein 1; Bile salt export pump; Multidrug resistance protein homolog 65; ATP-binding cassette sub-family B member 5; Leptomycin B resistance protein pmd1;ATP-binding cassette transporter, subfamily B, member 11, group MDR/PGP protein PpABCB11
Cs7g31640	Sedoheptulose-1,7-bisphosphatase, chloroplastic; Fructose-1,6-bisphosphatase class 1; Fructose-1,6-bisphosphatase 1;Chloroplast sedoheptulose-1, 7-bisphosphatase (Fragment)
Cs6g16980	3-oxoacyl-[acyl-carrier-protein] reductase FabG; Glucose 1-dehydrogenase; Oxidoreductase ucpA; Glucose 1-dehydrogenase B; Uncharacterized oxidoreductase yohF; 3-oxoacyl-[acyl-carrier-protein] reductase, chloroplastic; Probable L-xylulose reductase; Uncharacterized oxidoreductase ygcW; Glucose 1-dehydrogenase A; Tropinone reductase 1; 3-oxoacyl-[acyl-carrier-protein] reductase 3, chloroplastic; 3-…
orange1.1t03042	Tropinone reductase homolog; Tropinone reductase 1; Dehydrogenase/reductase SDR family member 4; 3-oxoacyl-[acyl-carrier-protein] reductase FabG; Gluconate 5-dehydrogenase; Bacilysin biosynthesis oxidoreductase BacC; Uncharacterized short-chain type dehydrogenase/reductase y4vI; Dehydrogenase/reductase SDR family member 4 (Fragment); Glucose 1-dehydrogenase 2; Granaticin polyketide synthase putat…
Cs3g23440	Lipase;Putative uncharacterized protein Sb04g034230
Cs1g23450	Oxygen-evolving enhancer protein 1, chloroplastic; Photosystem II manganese-stabilizing polypeptide; Oxygen-evolving enhancer protein 1, chloroplastic (Fragments); Oxygen-evolving enhancer protein 1, chloroplastic (Fragment);Chloroplast photosynthetic water oxidation complex 33kDa subunit (Fragment)
Cs8g09070	Putative uncharacterized protein Sb01g026180
Cs5g21190	Agmatine coumaroyltransferase; Anthocyanin 5-aromatic acyltransferase; Malonyl-coenzyme A:anthocyanin 3-O-glucoside-6''-O-malonyltransferase; Malonyl-coenzyme:anthocyanin 5-O-glucoside-6'''-O-malonyltransferase; BAHD acyltransferase DCR;Anthocyanin 5-aromatic acyltransferase/benzoyltransferase-like protein
Cs8g16290	Phenylalanine ammonia-lyase (Fragment);Phenylalanine ammonia-lyase 1; Phenylalanine ammonia-lyase class 2; Phenylalanine ammonia-lyase G4 (Fragment); Phenylalanine ammonia-lyase class 1 (Fragment)
orange1.1t02977	BAHD acyltransferase At5g47980; Vinorine synthase; Deacetylvindoline O-acetyltransferase; Salutaridinol 7-O-acetyltransferase;3'-N-debenzoyl-2'-deoxytaxol N-benzoyltransferase, putative
Cs3g23110	Isoaspartyl peptidase/L-asparaginase 1 subunit beta;Probable isoaspartyl peptidase/L-asparaginase 2; Isoaspartyl peptidase/L-asparaginase; Isoaspartyl peptidase/L-asparaginase (Fragment); Putative isoaspartyl peptidase/L-asparaginase; Isoaspartyl peptidase; L-asparaginase; Probable L-asparaginase GA20639; Putative L-asparaginase; N(4)-(Beta-N-acetylglucosaminyl)-L-asparaginase; Threonine aspartas…
Cs3g26220	Chaperone protein dnaJ 11, chloroplastic; Chaperone protein DnaJ;Putative uncharacterized protein Sb07g024945 (Fragment)
Cs2g23870	Probable aminotransferase TAT2; Tyrosine aminotransferase; Nicotianamine aminotransferase B; Nicotianamine aminotransferase A; S-alkyl-thiohydroximate lyase SUR1; Cystine lyase CORI3; Probable alanine aminotransferase, mitochondrial;Putative uncharacterized protein Sb02g003520
Cs2g31250	Serine--glyoxylate aminotransferase; Uncharacterized aminotransferase MJ0959; Soluble hydrogenase 42 kDa subunit; Soluble hydrogenase, small subunit; Serine--pyruvate aminotransferase; Serine--glyoxylate aminotransferase (Fragments);Putative uncharacterized protein Sb07g028080
Cs4g12760	Myb-related protein Zm1; Transcription repressor MYB4; Transcription factor MYB39; Myb-related protein P; Protein ODORANT1; Anthocyanin regulatory C1 protein; Transcription factor WER; Transcription factor GAMYB; Trichome differentiation protein GL1; Transcriptional activator Myb; Myb-related protein A;Myb-related protein Myb4, putative, expressed
orange1.1t02755	Cinnamoyl-CoA reductase, putative;Bifunctional dihydroflavonol 4-reductase/flavanone 4-reductase; Dihydroflavonol-4-reductase; Anthocyanidin reductase; Dihydroflavonol-4-reductase (Fragment); Putative uncharacterized oxidoreductase C513.07; Putative NADPH-dependent methylglyoxal reductase GRP2
Cs2g13040
Cs4g19060	Receptor-like protein kinase HSL1; LRR receptor-like serine/threonine-protein kinase HSL2; Leucine-rich repeat receptor-like protein kinase TDR; Receptor protein kinase CLAVATA1; Leucine-rich repeat receptor-like protein kinase PXL2; Leucine-rich repeat receptor-like serine/threonine-protein kinase BAM1; Probable leucine-rich repeat receptor-like protein kinase At5g63930; Probable LRR receptor-li…
Cs4g03740	Peroxidase 16; Peroxidase C1C (Fragment);Putative uncharacterized protein Sb01g007230
Cs2g30320	Putative uncharacterized protein Sb02g036836 (Fragment)
Cs7g09900	Putative photosystem II core complex proteins psbY, chloroplast (L-arginine metabolising enzyme) (L-AME);Photosystem II core complex proteins psbY, chloroplastic
Cs6g17360	Leucine-rich repeat receptor-like protein kinase (Fragment);Probable inactive receptor kinase RLK902; Probable leucine-rich repeat receptor-like protein kinase At1g68400; Inactive leucine-rich repeat receptor-like serine/threonine-protein kinase At5g24100; Putative inactive receptor-like protein kinase At1g64210; Probably inactive receptor-like protein kinase At5g41680; Probably inactive leucine-…
Cs6g18680	Ribulose bisphosphate carboxylase small chain, chloroplastic; Ribulose bisphosphate carboxylase small chain 3, chloroplastic; Ribulose bisphosphate carboxylase small chain C, chloroplastic;Ribulose bisphosphate carboxylase small chain (Precursor)

## Sheet: Supplemental Table S7
Supplemental Table S7 Gene set 2
Gene_ID	Annotation
Cs1g06390	High-level expression of sugar-inducible gene 2;B3 domain-containing protein Os07g0563300; B3 domain-containing transcription repressor VAL1; B3 domain-containing transcription factor VAL3; Regulatory protein viviparous-1; Putative B3 domain-containing protein Os04g0676650; AP2/ERF and B3 domain-containing protein Os01g0693400; AP2/ERF and B3 domain-containing transcription factor RAV1; AP2/ERF a…
Cs9g17780	Predicted protein (Fragment)
Cs2g21470
orange1.1t00942	Putative uncharacterized protein AlNc14C40G3408;Uncharacterized protein At4g14342; Splicing factor 3B subunit 5; Probable splicing factor 3B subunit 5
Cs7g13940	Serine carboxypeptidase (Carboxypeptidase D), putative;Serine carboxypeptidase-like 35; Serine carboxypeptidase 24; Putative serine carboxypeptidase-like 30; Serine carboxypeptidase II-2 (Fragment); P-(S)-hydroxymandelonitrile lyase; Uncharacterized serine carboxypeptidase K10B2.2; Virulence-related protein Nf314; Lysosomal protective protein; Pheromone-processing carboxypeptidase kex1
Cs5g10040	Senescence-inducible chloroplast stay-green protein (Fragment)
Cs5g09880	Cytochrome P450, family 76, subfamily C, polypeptide 6;7-ethoxycoumarin O-deethylase; Cytochrome P450 76C4; Cytochrome P450 76A1 (Fragment); (S)-N-methylcoclaurine 3'-hydroxylase isozyme 1 (Fragment); (S)-N-methylcoclaurine 3'-hydroxylase isozyme 2; Flavonoid 3'-monooxygenase; Probable (S)-N-methylcoclaurine 3'-hydroxylase isozyme 2; Berbamunine synthase; Licodione synthase; 4-hydroxyphenylacetal…
Cs9g17760	Putative uncharacterized protein
Cs7g13900	Putative uncharacterized protein;Uncharacterized protein At5g23160
Cs9g01400	Putative uncharacterized protein Sb01g016775 (Fragment);Pleiotropic drug resistance protein 3; ABC transporter G family member 37; Probable pleiotropic drug resistance protein 1; Putative pleiotropic drug resistance protein 7
Cs7g31790	L-type lectin-domain containing receptor kinase S.4; Putative L-type lectin-domain containing receptor kinase V.1; Probable L-type lectin-domain containing receptor kinase II.1; Lectin-domain containing receptor kinase VI.4; Probable inactive L-type lectin-domain containing receptor kinase III.1; Putative inactive L-type lectin-domain containing receptor kinase III.2; Receptor like protein kinase…
Cs5g18740
orange1.1t06004
orange1.1t06036
Cs7g15150	Uncharacterized mitochondrial protein AtMg00310;Putative non-LTR retroelement reverse transcriptase
Cs3g23040
Cs7g15170	Tetratricopeptide repeat (TPR)-containing protein-like protein
Cs1g24440	S-adenosyl-L-methionine:benzoic acid/salicylic acid carboxyl methyltransferase;Salicylate O-methyltransferase; Jasmonate O-methyltransferase; Benzoate carboxyl methyltransferase; Probable caffeine synthase 2; Caffeine synthase 1; 7-methylxanthosine synthase 1; 3,7-dimethylxanthine N-methyltransferase; Theobromine synthase 2; Monomethylxanthine methyltransferase 2; Indole-3-acetate O-methyltransfe…
Cs2g21595
Cs5g28655
Cs9g17770	Putative uncharacterized protein
Cs2g23820	Tyrosine aminotransferase; Probable aminotransferase TAT2; S-alkyl-thiohydroximate lyase SUR1; Nicotianamine aminotransferase B; Nicotianamine aminotransferase A; Cystine lyase CORI3; Putative aminotransferase YugH; Probable alanine aminotransferase, mitochondrial;Putative uncharacterized protein Sb02g003520
Cs6g08500	2-oxoglutarate (2OG) and Fe(II)-dependent oxygenase-like protein;Leucoanthocyanidin dioxygenase; Protein SRG1; Probable 2-oxoglutarate/Fe(II)-dependent dioxygenase; Codeine O-demethylase; Flavonol synthase/flavanone 3-hydroxylase; Thebaine 6-O-demethylase; S-norcoclaurine synthase 1; Naringenin,2-oxoglutarate 3-dioxygenase; 1-aminocyclopropane-1-carboxylate oxidase 1; Naringenin,2-oxoglutarate 3-…
orange1.1t02947	Anthranilate N-methyltransferase; Caffeic acid 3-O-methyltransferase; Quercetin 3-O-methyltransferase 1; (Iso)eugenol O-methyltransferase; Bergaptol O-methyltransferase; Inositol 4-methyltransferase; Caffeic acid 3-O-methyltransferase (Fragment); Tricetin 3',4',5'-O-trimethyltransferase; Flavone O-methyltransferase 1; (S)-scoulerine 9-O-methyltransferase; Isoliquiritigenin 2'-O-methyltransferase;…
Cs8g20130	ATP-binding cassette transporter, subfamily G, member 15, group PDR protein PpABCG15;ABC transporter G family member 31; Pleiotropic drug resistance protein 13; Probable pleiotropic drug resistance protein 1; Putative pleiotropic drug resistance protein 7
orange1.1t03541	Putative transcription elongation factor S-II; PHD finger protein 3;Putative transcription elongation factor, 5'-partial (Fragment)
Cs7g17300	1,3-beta-glucan synthase component family protein, expressed;Callose synthase 7; Putative callose synthase 6; 1,3-beta-glucan synthase component FKS1

## Sheet: Supplemental Table S8
Supplemental Table S8 All of the mutations identified using Whole Genome Sequence (WGS) analysis.
chr	pos	ref	alt_WT-1	genotype_WT-1	alt_WT-2	genotype_WT-2	alt_WT-3	genotype_WT-3	alt_MT-1	genotype_MT-1	alt_MT-2	genotype_MT-2	alt_MT-3	genotype_MT-3	gene
chr1	10006461	T	C	0/1	C	0/1	C	0/1	'-'	'-'	'-'	'-'	'-'	'-'	'-'
chr1	10006497	G	A	0/1	A	0/1	A	0/1	'-'	'-'	'-'	'-'	'-'	'-'	'-'
chr1	10016677	C	'-'	'-'	'-'	'-'	'-'	'-'	T	0/1	T	0/1	T	0/1	'-'
chr1	10017905	T	'-'	'-'	'-'	'-'	'-'	'-'	G	0/1	G	0/1	G	0/1	'-'
chr1	10017910	G	'-'	'-'	'-'	'-'	'-'	'-'	A	0/1	A	0/1	A	0/1	'-'
chr1	10019132	C	T	0/1	T	0/1	T	0/1	'-'	'-'	'-'	'-'	'-'	'-'	'-'
chr1	10020175	T	'-'	'-'	'-'	'-'	'-'	'-'	C	0/1	C	0/1	C	0/1	'-'
chr1	10030825	G	'-'	'-'	'-'	'-'	'-'	'-'	A	0/1	A	0/1	A	0/1	'-'
chr1	10039798	G	'-'	'-'	'-'	'-'	'-'	'-'	C	0/1	C	0/1	C	0/1	'-'
chr1	10064236	T	'-'	'-'	'-'	'-'	'-'	'-'	C	0/1	C	0/1	C	0/1	'-'
chr1	10094152	C	T	0/1	T	0/1	T	0/1	'-'	'-'	'-'	'-'	'-'	'-'	'-'
chr1	10115820	C	'-'	'-'	'-'	'-'	'-'	'-'	T	0/1	T	0/1	T	0/1	'-'
chr1	10116578	G	A	0/1	A	0/1	A	0/1	'-'	'-'	'-'	'-'	'-'	'-'	'-'
chr1	10124824	C	'-'	'-'	'-'	'-'	'-'	'-'	T	0/1	T	0/1	T	0/1	'-'
chr1	10133500	C	'-'	'-'	'-'	'-'	'-'	'-'	T	0/1	T	0/1	T	0/1	'-'
chr1	10157511	G	A	0/1	A	0/1	A	0/1	'-'	'-'	'-'	'-'	'-'	'-'	'-'
chr1	10157515	C	T	0/1	T	0/1	T	0/1	'-'	'-'	'-'	'-'	'-'	'-'	'-'
chr1	10157538	C	T	0/1	T	0/1	T	0/1	'-'	'-'	'-'	'-'	'-'	'-'	'-'
chr1	10158196	G	'-'	'-'	'-'	'-'	'-'	'-'	A	0/1	A	0/1	A	0/1	'-'
chr1	10158199	A	'-'	'-'	'-'	'-'	'-'	'-'	G	0/1	G	0/1	G	0/1	'-'
chr1	10166749	A	G	0/1	G	0/1	G	0/1	G	0/1	G	0/1	G	0/1	'-'
chr1	10180793	A	'-'	'-'	'-'	'-'	'-'	'-'	G	0/1	G	0/1	G	0/1	'-'
chr1	1020884	T	C	0/1	C	0/1	C	0/1	'-'	'-'	'-'	'-'	'-'	'-'	'-'
chr1	10226503	T	C	0/1	C	0/1	C	0/1	'-'	'-'	'-'	'-'	'-'	'-'	'-'
chr1	10230461	A	'-'	'-'	'-'	'-'	'-'	'-'	T	0/1	T	0/1	T	0/1	'-'
chr1	10233301	C	'-'	'-'	'-'	'-'	'-'	'-'	A	0/1	A	0/1	A	0/1	'-'
chr1	10235923	C	'-'	'-'	'-'	'-'	'-'	'-'	T	0/1	T	0/1	T	0/1	'-'
chr1	10235939	T	'-'	'-'	'-'	'-'	'-'	'-'	G	0/1	G	0/1	G	0/1	'-'
chr1	10235948	C	'-'	'-'	'-'	'-'	'-'	'-'	T	0/1	T	0/1	T	0/1	'-'
chr1	10248372	T	C	0/1	C	0/1	C	0/1	'-'	'-'	'-'	'-'	'-'	'-'	'-'
chr1	10248376	C	T	0/1	T	0/1	T	0/1	'-'	'-'	'-'	'-'	'-'	'-'	'-'
chr1	10248377	A	G	0/1	G	0/1	G	0/1	'-'	'-'	'-'	'-'	'-'	'-'	'-'
chr1	10248378	T	A	0/1	A	0/1	A	0/1	'-'	'-'	'-'	'-'	'-'	'-'	'-'
chr1	10248387	C	T	0/1	T	0/1	T	0/1	'-'	'-'	'-'	'-'	'-'	'-'	'-'
chr1	10249827	A	'-'	'-'	'-'	'-'	'-'	'-'	G	0/1	G	0/1	G	0/1	'-'
chr1	10249901	A	G	0/1	G	0/1	G	0/1	'-'	'-'	'-'	'-'	'-'	'-'	'-'
chr1	10249907	T	A	0/1	A	0/1	A	0/1	'-'	'-'	'-'	'-'	'-'	'-'	'-'
chr1	1027222	A	T	0/1	T	0/1	T	0/1	'-'	'-'	'-'	'-'	'-'	'-'	'-'
chr1	1027223	T	C	0/1	C	0/1	C	0/1	'-'	'-'	'-'	'-'	'-'	'-'	'-'
chr1	1027226	T	C	0/1	C	0/1	C	0/1	'-'	'-'	'-'	'-'	'-'	'-'	'-'
chr1	10277784	C	'-'	'-'	'-'	'-'	'-'	'-'	T	0/1	T	0/1	T	0/1	'-'
chr1	10290338	G	A	0/1	A	0/1	A	0/1	'-'	'-'	'-'	'-'	'-'	'-'	'-'
chr1	10300313	T	'-'	'-'	'-'	'-'	'-'	'-'	C	0/1	C	0/1	C	0/1	'-'
chr1	10300315	G	'-'	'-'	'-'	'-'	'-'	'-'	C	0/1	C	0/1	C	0/1	'-'
chr1	10309501	G	'-'	'-'	'-'	'-'	'-'	'-'	A	0/1	A	0/1	A	0/1	'-'
chr1	10309502	C	'-'	'-'	'-'	'-'	'-'	'-'	T	0/1	T	0/1	T	0/1	'-'
chr1	10309508	G	'-'	'-'	'-'	'-'	'-'	'-'	T	0/1	T	0/1	T	0/1	'-'
chr1	10314888	A	G	0/1	G	0/1	G	0/1	'-'	'-'	'-'	'-'	'-'	'-'	'-'
chr1	1031719	T	'-'	'-'	'-'	'-'	'-'	'-'	A	0/1	A	0/1	A	0/1	'-'
chr1	10334500	A	C	0/1	C	0/1	C	0/1	'-'	'-'	'-'	'-'	'-'	'-'	'-'
chr1	10358476	C	'-'	'-'	'-'	'-'	'-'	'-'	T	0/1	T	0/1	T	0/1	'-'
chr1	10359169	T	C	0/1	C	0/1	C	0/1	'-'	'-'	'-'	'-'	'-'	'-'	'-'
chr1	10359180	A	C	0/1	C	0/1	C	0/1	'-'	'-'	'-'	'-'	'-'	'-'	'-'
chr1	10363220	G	A	0/1	A	0/1	A	0/1	'-'	'-'	'-'	'-'	'-'	'-'	'-'
chr1	10377183	A	'-'	'-'	'-'	'-'	'-'	'-'	G	0/1	G	0/1	G	0/1	'-'
chr1	10377194	A	'-'	'-'	'-'	'-'	'-'	'-'	C	0/1	C	0/1	C	0/1	'-'
chr1	10384168	G	'-'	'-'	'-'	'-'	'-'	'-'	A	0/1	A	0/1	A	0/1	'-'
chr1	10404100	G	A	0/1	A	0/1	A	0/1	'-'	'-'	'-'	'-'	'-'	'-'	'-'
chr1	10417846	T	C	0/1	C	0/1	C	0/1	'-'	'-'	'-'	'-'	'-'	'-'	'-'
chr1	10417854	G	T	0/1	T	0/1	T	0/1	'-'	'-'	'-'	'-'	'-'	'-'	'-'
chr1	10420196	G	'-'	'-'	'-'	'-'	'-'	'-'	A	0/1	A	0/1	A	0/1	'-'
chr1	10420362	C	T	0/1	T	0/1	T	0/1	'-'	'-'	'-'	'-'	'-'	'-'	'-'
chr1	10423535	T	'-'	'-'	'-'	'-'	'-'	'-'	C	0/1	C	0/1	C	0/1	'-'
chr1	10427648	C	T	0/1	T	0/1	T	0/1	A	0/1	A	0/1	A	0/1	'-'
chr1	10430235	C	T	0/1	T	0/1	T	0/1	'-'	'-'	'-'	'-'	'-'	'-'	'-'
chr1	10430247	T	C	0/1	C	0/1	C	0/1	'-'	'-'	'-'	'-'	'-'	'-'	'-'
chr1	10430298	T	'-'	'-'	'-'	'-'	'-'	'-'	A	0/1	A	0/1	A	0/1	'-'
chr1	10430346	C	'-'	'-'	'-'	'-'	'-'	'-'	G	0/1	G	0/1	G	0/1	'-'
chr1	10436434	A	'-'	'-'	'-'	'-'	'-'	'-'	G	0/1	G	0/1	G	0/1	'-'
chr1	10441620	A	'-'	'-'	'-'	'-'	'-'	'-'	G	0/1	G	0/1	G	0/1	'-'
chr1	10466063	G	A	0/1	A	0/1	A	0/1	'-'	'-'	'-'	'-'	'-'	'-'	'-'
chr1	10467038	A	T	0/1	T	0/1	T	0/1	'-'	'-'	'-'	'-'	'-'	'-'	'-'
chr1	10472952	A	G	0/1	G	0/1	G	0/1	'-'	'-'	'-'	'-'	'-'	'-'	'-'
chr1	10485042	A	'-'	'-'	'-'	'-'	'-'	'-'	G	0/1	G	0/1	G	0/1	'-'
chr1	10485941	T	'-'	'-'	'-'	'-'	'-'	'-'	A	0/1	A	0/1	A	0/1	'-'
chr1	10485967	T	'-'	'-'	'-'	'-'	'-'	'-'	C	0/1	C	0/1	C	0/1	'-'
chr1	10485968	C	'-'	'-'	'-'	'-'	'-'	'-'	G	0/1	G	0/1	G	0/1	'-'
chr1	10488952	G	'-'	'-'	'-'	'-'	'-'	'-'	A	0/1	A	0/1	A	0/1	'-'
chr1	10494837	C	'-'	'-'	'-'	'-'	'-'	'-'	T	0/1	T	0/1	T	0/1	'-'
chr1	10499230	A	G	0/1	G	0/1	G	0/1	'-'	'-'	'-'	'-'	'-'	'-'	'-'
chr1	10503072	A	'-'	'-'	'-'	'-'	'-'	'-'	G	0/1	G	0/1	G	0/1	Cs1g09240
chr1	10512232	A	'-'	'-'	'-'	'-'	'-'	'-'	G	0/1	G	0/1	G	0/1	'-'
chr1	10515067	T	G	0/1	G	0/1	G	0/1	'-'	'-'	'-'	'-'	'-'	'-'	'-'
chr1	10515081	C	T	0/1	T	0/1	T	0/1	'-'	'-'	'-'	'-'	'-'	'-'	'-'
chr1	10517824	A	'-'	'-'	'-'	'-'	'-'	'-'	G	0/1	G	0/1	G	0/1	'-'
chr1	10517829	T	'-'	'-'	'-'	'-'	'-'	'-'	C	0/1	C	0/1	C	0/1	'-'
chr1	10518017	C	'-'	'-'	'-'	'-'	'-'	'-'	T	0/1	T	0/1	T	0/1	'-'
chr1	10518056	A	'-'	'-'	'-'	'-'	'-'	'-'	G	0/1	G	0/1	G	0/1	'-'
chr1	10518348	T	C	0/1	C	0/1	C	0/1	'-'	'-'	'-'	'-'	'-'	'-'	'-'
chr1	10518351	T	C	0/1	C	0/1	C	0/1	'-'	'-'	'-'	'-'	'-'	'-'	'-'
chr1	10523431	A	T	0/1	T	0/1	T	0/1	'-'	'-'	'-'	'-'	'-'	'-'	'-'
chr1	10525517	G	A	0/1	A	0/1	A	0/1	'-'	'-'	'-'	'-'	'-'	'-'	'-'
chr1	10529966	G	'-'	'-'	'-'	'-'	'-'	'-'	T	0/1	T	0/1	T	0/1	'-'
chr1	10529972	G	'-'	'-'	'-'	'-'	'-'	'-'	C	0/1	C	0/1	C	0/1	'-'
chr1	10532688	C	'-'	'-'	'-'	'-'	'-'	'-'	T	0/1	T	0/1	T	0/1	'-'
chr1	1054090	C	T	0/1	T	0/1	T	0/1	'-'	'-'	'-'	'-'	'-'	'-'	'-'
chr1	10551871	C	T	0/1	T	0/1	T	0/1	'-'	'-'	'-'	'-'	'-'	'-'	'-'
chr1	10554239	C	G	0/1	G	0/1	G	0/1	'-'	'-'	'-'	'-'	'-'	'-'	'-'
chr1	10554244	G	A	0/1	A	0/1	A	0/1	'-'	'-'	'-'	'-'	'-'	'-'	'-'
chr1	10615793	A	T	0/1	T	0/1	T	0/1	'-'	'-'	'-'	'-'	'-'	'-'	'-'
chr1	10616669	T	'-'	'-'	'-'	'-'	'-'	'-'	C	0/1	C	0/1	C	0/1	'-'
chr1	10623683	A	G	0/1	G	0/1	G	0/1	'-'	'-'	'-'	'-'	'-'	'-'	'-'
chr1	10623687	C	T	0/1	T	0/1	T	0/1	'-'	'-'	'-'	'-'	'-'	'-'	'-'
chr1	10665346	T	C	0/1	C	0/1	C	0/1	'-'	'-'	'-'	'-'	'-'	'-'	'-'
chr1	1070360	G	'-'	'-'	'-'	'-'	'-'	'-'	A	0/1	A	0/1	A	0/1	'-'
chr1	10710992	C	A	0/1	A	0/1	A	0/1	'-'	'-'	'-'	'-'	'-'	'-'	'-'
chr1	10711007	C	T	0/1	T	0/1	T	0/1	'-'	'-'	'-'	'-'	'-'	'-'	'-'
chr1	10711010	G	T	0/1	T	0/1	T	0/1	'-'	'-'	'-'	'-'	'-'	'-'	'-'
chr1	10715322	G	'-'	'-'	'-'	'-'	'-'	'-'	A	0/1	A	0/1	A	0/1	'-'
chr1	10794603	A	G	0/1	G	0/1	G	0/1	'-'	'-'	'-'	'-'	'-'	'-'	'-'
chr1	10794614	A	G	0/1	G	0/1	G	0/1	'-'	'-'	'-'	'-'	'-'	'-'	'-'
chr1	10795740	T	C	0/1	C	0/1	C	0/1	'-'	'-'	'-'	'-'	'-'	'-'	'-'
chr1	10798458	G	'-'	'-'	'-'	'-'	'-'	'-'	A	0/1	A	0/1	A	0/1	'-'
chr1	10829837	C	A	0/1	A	0/1	A	0/1	'-'	'-'	'-'	'-'	'-'	'-'	'-'
chr1	10844755	T	C	0/1	C	0/1	C	0/1	'-'	'-'	'-'	'-'	'-'	'-'	'-'
chr1	10847	A	'-'	'-'	'-'	'-'	'-'	'-'	G	0/1	G	0/1	G	0/1	'-'
chr1	10858534	G	'-'	'-'	'-'	'-'	'-'	'-'	C	0/1	C	0/1	C	0/1	'-'
chr1	10866418	G	A	0/1	A	0/1	A	0/1	'-'	'-'	'-'	'-'	'-'	'-'	'-'
chr1	10890881	G	T	0/1	T	0/1	T	0/1	'-'	'-'	'-'	'-'	'-'	'-'	'-'
chr1	10890884	A	T	0/1	T	0/1	T	0/1	'-'	'-'	'-'	'-'	'-'	'-'	'-'
chr1	10903128	A	G	0/1	G	0/1	G	0/1	'-'	'-'	'-'	'-'	'-'	'-'	'-'
chr1	10904566	G	A	0/1	A	0/1	A	0/1	'-'	'-'	'-'	'-'	'-'	'-'	'-'
chr1	10924898	T	G	0/1	G	0/1	G	0/1	'-'	'-'	'-'	'-'	'-'	'-'	'-'
chr1	10924943	A	C	0/1	C	0/1	C	0/1	'-'	'-'	'-'	'-'	'-'	'-'	'-'
chr1	10926082	A	G	0/1	G	0/1	G	0/1	'-'	'-'	'-'	'-'	'-'	'-'	'-'
chr1	10926085	A	C	0/1	C	0/1	C	0/1	'-'	'-'	'-'	'-'	'-'	'-'	'-'
chr1	10926113	A	G	0/1	G	0/1	G	0/1	'-'	'-'	'-'	'-'	'-'	'-'	'-'
chr1	10926139	A	G	0/1	G	0/1	G	0/1	'-'	'-'	'-'	'-'	'-'	'-'	'-'
chr1	10934656	A	'-'	'-'	'-'	'-'	'-'	'-'	T	0/1	T	0/1	T	0/1	'-'
chr1	10948041	C	'-'	'-'	'-'	'-'	'-'	'-'	T	0/1	T	0/1	T	0/1	'-'
chr1	10949464	T	C	0/1	C	0/1	C	0/1	'-'	'-'	'-'	'-'	'-'	'-'	'-'
chr1	10949465	T	C	0/1	C	0/1	C	0/1	'-'	'-'	'-'	'-'	'-'	'-'	'-'
chr1	10949478	G	A	0/1	A	0/1	A	0/1	'-'	'-'	'-'	'-'	'-'	'-'	'-'
chr1	10962001	T	G	0/1	G	0/1	G	0/1	'-'	'-'	'-'	'-'	'-'	'-'	'-'
chr1	10963048	A	C	0/1	C	0/1	C	0/1	'-'	'-'	'-'	'-'	'-'	'-'	'-'
chr1	10963124	A	'-'	'-'	'-'	'-'	'-'	'-'	G	0/1	G	0/1	G	0/1	'-'
chr1	10977552	T	'-'	'-'	'-'	'-'	'-'	'-'	C	0/1	C	0/1	C	0/1	'-'
chr1	10981662	G	T	0/1	T	0/1	T	0/1	'-'	'-'	'-'	'-'	'-'	'-'	'-'
chr1	10991366	G	'-'	'-'	'-'	'-'	'-'	'-'	T	0/1	T	0/1	T	0/1	'-'
chr1	10992126	T	'-'	'-'	'-'	'-'	'-'	'-'	C	0/1	C	0/1	C	0/1	'-'
chr1	10993083	G	C	0/1	C	0/1	C	0/1	'-'	'-'	'-'	'-'	'-'	'-'	'-'
chr1	11003350	T	C	0/1	C	0/1	C	0/1	'-'	'-'	'-'	'-'	'-'	'-'	'-'
chr1	11003354	T	A	0/1	A	0/1	A	0/1	'-'	'-'	'-'	'-'	'-'	'-'	'-'
chr1	11040650	G	'-'	'-'	'-'	'-'	'-'	'-'	A	0/1	A	0/1	A	0/1	'-'
chr1	11048610	T	'-'	'-'	'-'	'-'	'-'	'-'	C	0/1	C	0/1	C	0/1	'-'
chr1	11095518	T	'-'	'-'	'-'	'-'	'-'	'-'	A	0/1	A	0/1	A	0/1	'-'
chr1	11103052	T	C	0/1	C	0/1	C	0/1	C	0/1	C	0/1	C	0/1	'-'
chr1	11132674	C	T	0/1	T	0/1	T	0/1	A,T	2019-01-02	A,T	2019-01-02	A,T	2019-01-02	'-'
chr1	11151759	C	'-'	'-'	'-'	'-'	'-'	'-'	T	0/1	T	0/1	T	0/1	'-'
chr1	11166807	A	T	0/1	T	0/1	T	0/1	'-'	'-'	'-'	'-'	'-'	'-'	'-'
chr1	11166895	C	T	0/1	T	0/1	T	0/1	'-'	'-'	'-'	'-'	'-'	'-'	'-'
chr1	11166915	A	T	0/1	T	0/1	T	0/1	'-'	'-'	'-'	'-'	'-'	'-'	'-'
chr1	11167767	G	A	0/1	A	0/1	A	0/1	'-'	'-'	'-'	'-'	'-'	'-'	'-'
chr1	11168517	C	T	0/1	T	0/1	T	0/1	'-'	'-'	'-'	'-'	'-'	'-'	'-'
chr1	11175303	T	C	0/1	C	0/1	C	0/1	'-'	'-'	'-'	'-'	'-'	'-'	'-'
chr1	11189061	G	T	0/1	T	0/1	T	0/1	'-'	'-'	'-'	'-'	'-'	'-'	'-'
chr1	11189062	G	T	0/1	T	0/1	T	0/1	'-'	'-'	'-'	'-'	'-'	'-'	'-'
chr1	11189072	G	A	0/1	A	0/1	A	0/1	'-'	'-'	'-'	'-'	'-'	'-'	'-'
chr1	11189073	G	A	0/1	A	0/1	A	0/1	'-'	'-'	'-'	'-'	'-'	'-'	'-'
chr1	11189081	A	C	0/1	C	0/1	C	0/1	'-'	'-'	'-'	'-'	'-'	'-'	'-'
chr1	11216143	A	C	0/1	C	0/1	C	0/1	'-'	'-'	'-'	'-'	'-'	'-'	'-'
chr1	11216147	A	G	0/1	G	0/1	G	0/1	'-'	'-'	'-'	'-'	'-'	'-'	'-'
chr1	11218800	C	A	0/1	A	0/1	A	0/1	'-'	'-'	'-'	'-'	'-'	'-'	'-'
chr1	11218814	T	C	0/1	C	0/1	C	0/1	'-'	'-'	'-'	'-'	'-'	'-'	'-'
chr1	11218825	G	A	0/1	A	0/1	A	0/1	'-'	'-'	'-'	'-'	'-'	'-'	'-'
chr1	11218833	G	A	0/1	A	0/1	A	0/1	'-'	'-'	'-'	'-'	'-'	'-'	'-'
chr1	1122359	A	G	0/1	G	0/1	G	0/1	'-'	'-'	'-'	'-'	'-'	'-'	'-'
chr1	1122362	A	T	0/1	T	0/1	T	0/1	'-'	'-'	'-'	'-'	'-'	'-'	'-'
chr1	11243437	A	'-'	'-'	'-'	'-'	'-'	'-'	G	0/1	G	0/1	G	0/1	'-'
chr1	11301803	G	'-'	'-'	'-'	'-'	'-'	'-'	A	0/1	A	0/1	A	0/1	'-'
chr1	11335432	G	'-'	'-'	'-'	'-'	'-'	'-'	A	0/1	A	0/1	A	0/1	'-'
chr1	11349202	C	T	0/1	T	0/1	T	0/1	'-'	'-'	'-'	'-'	'-'	'-'	'-'
chr1	11349253	C	A	0/1	A	0/1	A	0/1	'-'	'-'	'-'	'-'	'-'	'-'	'-'
chr1	11349256	C	T	0/1	T	0/1	T	0/1	'-'	'-'	'-'	'-'	'-'	'-'	'-'
chr1	11350343	T	'-'	'-'	'-'	'-'	'-'	'-'	C	0/1	C	0/1	C	0/1	'-'
chr1	11350349	A	'-'	'-'	'-'	'-'	'-'	'-'	G	0/1	G	0/1	G	0/1	'-'
chr1	11350372	C	'-'	'-'	'-'	'-'	'-'	'-'	T	0/1	T	0/1	T	0/1	'-'
chr1	11350377	A	'-'	'-'	'-'	'-'	'-'	'-'	G	0/1	G	0/1	G	0/1	'-'
chr1	1136744	T	'-'	'-'	'-'	'-'	'-'	'-'	A	0/1	A	0/1	A	0/1	'-'
chr1	11384346	T	'-'	'-'	'-'	'-'	'-'	'-'	C	0/1	C	0/1	C	0/1	'-'
chr1	11408229	G	'-'	'-'	'-'	'-'	'-'	'-'	A	0/1	A	0/1	A	0/1	'-'
chr1	11408247	T	'-'	'-'	'-'	'-'	'-'	'-'	A	0/1	A	0/1	A	0/1	'-'
chr1	11408258	T	'-'	'-'	'-'	'-'	'-'	'-'	A	0/1	A	0/1	A	0/1	'-'
chr1	11408260	T	'-'	'-'	'-'	'-'	'-'	'-'	G	0/1	G	0/1	G	0/1	'-'
chr1	11412692	C	'-'	'-'	'-'	'-'	'-'	'-'	T	0/1	T	0/1	T	0/1	'-'
chr1	11434666	C	'-'	'-'	'-'	'-'	'-'	'-'	T	0/1	T	0/1	T	0/1	'-'
chr1	11439644	T	C	0/1	C	0/1	C	0/1	'-'	'-'	'-'	'-'	'-'	'-'	'-'
chr1	11495667	A	'-'	'-'	'-'	'-'	'-'	'-'	G	0/1	G	0/1	G	0/1	'-'
chr1	11523204	A	G	0/1	G	0/1	G	0/1	'-'	'-'	'-'	'-'	'-'	'-'	'-'
chr1	11572775	A	C	0/1	C	0/1	C	0/1	'-'	'-'	'-'	'-'	'-'	'-'	'-'
chr1	11580719	C	T	0/1	T	0/1	T	0/1	'-'	'-'	'-'	'-'	'-'	'-'	'-'
chr1	11594463	G	'-'	'-'	'-'	'-'	'-'	'-'	T	0/1	T	0/1	T	0/1	'-'
chr1	11636005	T	'-'	'-'	'-'	'-'	'-'	'-'	C	0/1	C	0/1	C	0/1	'-'
chr1	11648197	G	'-'	'-'	'-'	'-'	'-'	'-'	T	0/1	T	0/1	T	0/1	'-'
chr1	11650402	T	A	0/1	A	0/1	A	0/1	'-'	'-'	'-'	'-'	'-'	'-'	'-'
chr1	11659649	T	'-'	'-'	'-'	'-'	'-'	'-'	A	0/1	A	0/1	A	0/1	'-'
chr1	11661235	A	'-'	'-'	'-'	'-'	'-'	'-'	G	0/1	G	0/1	G	0/1	'-'
chr1	1167992	A	'-'	'-'	'-'	'-'	'-'	'-'	C	0/1	C	0/1	C	0/1	'-'
chr1	11713995	A	'-'	'-'	'-'	'-'	'-'	'-'	G	0/1	G	0/1	G	0/1	'-'
chr1	11736306	G	A	0/1	A	0/1	A	0/1	'-'	'-'	'-'	'-'	'-'	'-'	'-'
chr1	11736333	A	T	0/1	T	0/1	T	0/1	'-'	'-'	'-'	'-'	'-'	'-'	'-'
chr1	11736334	C	T	0/1	T	0/1	T	0/1	'-'	'-'	'-'	'-'	'-'	'-'	'-'
chr1	11751283	A	'-'	'-'	'-'	'-'	'-'	'-'	G	0/1	G	0/1	G	0/1	Cs1g09950
chr1	11752615	A	G	0/1	G	0/1	G	0/1	'-'	'-'	'-'	'-'	'-'	'-'	'-'
chr1	11756881	A	C	0/1	C	0/1	C	0/1	G	0/1	G	0/1	G	0/1	'-'
chr1	11760693	G	A	0/1	A	0/1	A	0/1	'-'	'-'	'-'	'-'	'-'	'-'	'-'
chr1	11820141	G	A	0/1	A	0/1	A	0/1	'-'	'-'	'-'	'-'	'-'	'-'	'-'
chr1	11820686	A	G	0/1	G	0/1	G	0/1	'-'	'-'	'-'	'-'	'-'	'-'	'-'
chr1	11820687	T	A	0/1	A	0/1	A	0/1	'-'	'-'	'-'	'-'	'-'	'-'	'-'
chr1	11825659	C	'-'	'-'	'-'	'-'	'-'	'-'	T	0/1	T	0/1	T	0/1	'-'
chr1	11825670	T	'-'	'-'	'-'	'-'	'-'	'-'	C	0/1	C	0/1	C	0/1	'-'
chr1	11825674	T	'-'	'-'	'-'	'-'	'-'	'-'	C	0/1	C	0/1	C	0/1	'-'
chr1	11825685	C	'-'	'-'	'-'	'-'	'-'	'-'	T	0/1	T	0/1	T	0/1	'-'
chr1	11837354	T	'-'	'-'	'-'	'-'	'-'	'-'	C	0/1	C	0/1	C	0/1	'-'
chr1	11872375	G	'-'	'-'	'-'	'-'	'-'	'-'	A	0/1	A	0/1	A	0/1	'-'
chr1	1188913	C	'-'	'-'	'-'	'-'	'-'	'-'	T	0/1	T	0/1	T	0/1	'-'
chr1	11902946	A	'-'	'-'	'-'	'-'	'-'	'-'	G	0/1	G	0/1	G	0/1	Cs1g10050
chr1	11903349	C	'-'	'-'	'-'	'-'	'-'	'-'	T	0/1	T	0/1	T	0/1	Cs1g10050
chr1	11904900	T	'-'	'-'	'-'	'-'	'-'	'-'	C	0/1	C	0/1	C	0/1	Cs1g10050
chr1	11904908	G	'-'	'-'	'-'	'-'	'-'	'-'	A	0/1	A	0/1	A	0/1	Cs1g10050
chr1	11906900	T	'-'	'-'	'-'	'-'	'-'	'-'	G	0/1	G	0/1	G	0/1	'-'
chr1	11911488	A	'-'	'-'	'-'	'-'	'-'	'-'	T	0/1	T	0/1	T	0/1	Cs1g10060
chr1	11911917	A	'-'	'-'	'-'	'-'	'-'	'-'	C	0/1	C	0/1	C	0/1	Cs1g10060
chr1	11913242	A	'-'	'-'	'-'	'-'	'-'	'-'	T	0/1	T	0/1	T	0/1	'-'
chr1	11920358	T	A	0/1	A	0/1	A	0/1	'-'	'-'	'-'	'-'	'-'	'-'	'-'
chr1	11933935	A	G	0/1	G	0/1	G	0/1	'-'	'-'	'-'	'-'	'-'	'-'	'-'
chr1	11933938	G	A	0/1	A	0/1	A	0/1	'-'	'-'	'-'	'-'	'-'	'-'	'-'
chr1	11945984	A	'-'	'-'	'-'	'-'	'-'	'-'	G	0/1	G	0/1	G	0/1	'-'
chr1	11957698	A	'-'	'-'	'-'	'-'	'-'	'-'	G	0/1	G	0/1	G	0/1	'-'
chr1	11978195	G	'-'	'-'	'-'	'-'	'-'	'-'	A	0/1	A	0/1	A	0/1	'-'
chr1	11982677	G	A	0/1	A	0/1	A	0/1	'-'	'-'	'-'	'-'	'-'	'-'	'-'
chr1	11997395	C	T	0/1	T	0/1	T	0/1	'-'	'-'	'-'	'-'	'-'	'-'	'-'
chr1	12004423	G	'-'	'-'	'-'	'-'	'-'	'-'	T	0/1	T	0/1	T	0/1	'-'
chr1	12004425	T	'-'	'-'	'-'	'-'	'-'	'-'	G	0/1	G	0/1	G	0/1	'-'
chr1	12004431	A	'-'	'-'	'-'	'-'	'-'	'-'	G	0/1	G	0/1	G	0/1	'-'
chr1	12004451	A	'-'	'-'	'-'	'-'	'-'	'-'	T	0/1	T	0/1	T	0/1	'-'
chr1	12011201	T	'-'	'-'	'-'	'-'	'-'	'-'	A	0/1	A	0/1	A	0/1	'-'
chr1	12011259	G	'-'	'-'	'-'	'-'	'-'	'-'	A	0/1	A	0/1	A	0/1	'-'
chr1	12025371	G	'-'	'-'	'-'	'-'	'-'	'-'	A	0/1	A	0/1	A	0/1	'-'
chr1	12025374	C	'-'	'-'	'-'	'-'	'-'	'-'	A	0/1	A	0/1	A	0/1	'-'
chr1	12029713	C	'-'	'-'	'-'	'-'	'-'	'-'	T	0/1	T	0/1	T	0/1	'-'
chr1	12029717	T	'-'	'-'	'-'	'-'	'-'	'-'	C	0/1	C	0/1	C	0/1	'-'
chr1	12030810	T	'-'	'-'	'-'	'-'	'-'	'-'	C	0/1	C	0/1	C	0/1	'-'
chr1	12030816	A	'-'	'-'	'-'	'-'	'-'	'-'	G	0/1	G	0/1	G	0/1	'-'
chr1	12041255	T	C	0/1	C	0/1	C	0/1	'-'	'-'	'-'	'-'	'-'	'-'	'-'
chr1	12078511	C	'-'	'-'	'-'	'-'	'-'	'-'	T	0/1	T	0/1	T	0/1	'-'
chr1	12098932	A	C	0/1	C	0/1	C	0/1	'-'	'-'	'-'	'-'	'-'	'-'	'-'
chr1	12098934	T	A	0/1	A	0/1	A	0/1	'-'	'-'	'-'	'-'	'-'	'-'	'-'
chr1	12098970	A	C	0/1	C	0/1	C	0/1	'-'	'-'	'-'	'-'	'-'	'-'	'-'
chr1	12150093	T	'-'	'-'	'-'	'-'	'-'	'-'	C	0/1	C	0/1	C	0/1	'-'
chr1	12158520	G	A	0/1	A	0/1	A	0/1	'-'	'-'	'-'	'-'	'-'	'-'	'-'
chr1	1221347	G	T	0/1	T	0/1	T	0/1	'-'	'-'	'-'	'-'	'-'	'-'	'-'
chr1	12226311	G	'-'	'-'	'-'	'-'	'-'	'-'	A	0/1	A	0/1	A	0/1	'-'
chr1	12226822	A	T	0/1	T	0/1	T	0/1	'-'	'-'	'-'	'-'	'-'	'-'	'-'
chr1	12227164	C	'-'	'-'	'-'	'-'	'-'	'-'	T	0/1	T	0/1	T	0/1	'-'
chr1	12232167	C	T	0/1	T	0/1	T	0/1	'-'	'-'	'-'	'-'	'-'	'-'	'-'
chr1	12240638	C	T	0/1	T	0/1	T	0/1	'-'	'-'	'-'	'-'	'-'	'-'	'-'
chr1	12260155	C	T	0/1	T	0/1	T	0/1	'-'	'-'	'-'	'-'	'-'	'-'	'-'
chr1	12300664	G	'-'	'-'	'-'	'-'	'-'	'-'	A	0/1	A	0/1	A	0/1	'-'
chr1	12310763	T	'-'	'-'	'-'	'-'	'-'	'-'	C	0/1	C	0/1	C	0/1	'-'
chr1	12310776	T	'-'	'-'	'-'	'-'	'-'	'-'	C	0/1	C	0/1	C	0/1	'-'
chr1	12310784	G	'-'	'-'	'-'	'-'	'-'	'-'	A	0/1	A	0/1	A	0/1	'-'
chr1	12311623	C	'-'	'-'	'-'	'-'	'-'	'-'	A	0/1	A	0/1	A	0/1	'-'
chr1	12311686	G	'-'	'-'	'-'	'-'	'-'	'-'	A	0/1	A	0/1	A	0/1	'-'
chr1	12319090	A	T	0/1	T	0/1	T	0/1	'-'	'-'	'-'	'-'	'-'	'-'	'-'
chr1	12345406	T	C	0/1	C	0/1	C	0/1	'-'	'-'	'-'	'-'	'-'	'-'	'-'
chr1	12362397	G	A	0/1	A	0/1	A	0/1	'-'	'-'	'-'	'-'	'-'	'-'	'-'
chr1	12383061	T	C	0/1	C	0/1	C	0/1	C	0/1	C	0/1	C	0/1	'-'
chr1	1240892	A	C	0/1	C	0/1	C	0/1	'-'	'-'	'-'	'-'	'-'	'-'	'-'
chr1	1240928	T	C	0/1	C	0/1	C	0/1	'-'	'-'	'-'	'-'	'-'	'-'	'-'
chr1	1240929	A	G	0/1	G	0/1	G	0/1	'-'	'-'	'-'	'-'	'-'	'-'	'-'
chr1	1240946	A	T	0/1	T	0/1	T	0/1	'-'	'-'	'-'	'-'	'-'	'-'	'-'
chr1	1240957	T	C	0/1	C	0/1	C	0/1	'-'	'-'	'-'	'-'	'-'	'-'	'-'
chr1	1240958	G	A	0/1	A	0/1	A	0/1	'-'	'-'	'-'	'-'	'-'	'-'	'-'
chr1	12409624	C	T	0/1	T	0/1	T	0/1	'-'	'-'	'-'	'-'	'-'	'-'	'-'
chr1	12412581	A	G	0/1	G	0/1	G	0/1	'-'	'-'	'-'	'-'	'-'	'-'	'-'
chr1	12413912	A	G	0/1	G	0/1	G	0/1	'-'	'-'	'-'	'-'	'-'	'-'	'-'
chr1	12413970	G	T	0/1	T	0/1	T	0/1	'-'	'-'	'-'	'-'	'-'	'-'	'-'
chr1	12422586	T	'-'	'-'	'-'	'-'	'-'	'-'	C	0/1	C	0/1	C	0/1	Cs1g10410
chr1	12422602	A	'-'	'-'	'-'	'-'	'-'	'-'	G	0/1	G	0/1	G	0/1	Cs1g10410
chr1	12432984	T	C	0/1	C	0/1	C	0/1	'-'	'-'	'-'	'-'	'-'	'-'	'-'
chr1	12432989	A	T	0/1	T	0/1	T	0/1	'-'	'-'	'-'	'-'	'-'	'-'	'-'
chr1	12443991	A	'-'	'-'	'-'	'-'	'-'	'-'	T	0/1	T	0/1	T	0/1	'-'
chr1	12448794	A	G	0/1	G	0/1	G	0/1	'-'	'-'	'-'	'-'	'-'	'-'	'-'
chr1	1245026	G	'-'	'-'	'-'	'-'	'-'	'-'	A	0/1	A	0/1	A	0/1	'-'
chr1	12497731	C	'-'	'-'	'-'	'-'	'-'	'-'	T	0/1	T	0/1	T	0/1	'-'
chr1	12533757	G	A	0/1	A	0/1	A	0/1	'-'	'-'	'-'	'-'	'-'	'-'	'-'
chr1	12549356	C	'-'	'-'	'-'	'-'	'-'	'-'	G	0/1	G	0/1	G	0/1	'-'
chr1	12550036	A	C	0/1	C	0/1	C	0/1	'-'	'-'	'-'	'-'	'-'	'-'	'-'
chr1	12550299	C	T	0/1	T	0/1	T	0/1	'-'	'-'	'-'	'-'	'-'	'-'	'-'
chr1	12571192	G	'-'	'-'	'-'	'-'	'-'	'-'	A	0/1	A	0/1	A	0/1	'-'
chr1	12579838	T	'-'	'-'	'-'	'-'	'-'	'-'	C	0/1	C	0/1	C	0/1	'-'
chr1	12601703	C	'-'	'-'	'-'	'-'	'-'	'-'	A	0/1	A	0/1	A	0/1	'-'
chr1	12619681	T	'-'	'-'	'-'	'-'	'-'	'-'	C	0/1	C	0/1	C	0/1	'-'
chr1	12660880	T	A	0/1	A	0/1	A	0/1	'-'	'-'	'-'	'-'	'-'	'-'	'-'
chr1	1266644	T	C	0/1	C	0/1	C	0/1	'-'	'-'	'-'	'-'	'-'	'-'	Cs1g02065
chr1	12668093	G	T	0/1	T	0/1	T	0/1	'-'	'-'	'-'	'-'	'-'	'-'	'-'
chr1	12671022	G	A	0/1	A	0/1	A	0/1	'-'	'-'	'-'	'-'	'-'	'-'	'-'
chr1	12671038	G	A	0/1	A	0/1	A	0/1	'-'	'-'	'-'	'-'	'-'	'-'	'-'
chr1	12671099	T	A	0/1	A	0/1	A	0/1	'-'	'-'	'-'	'-'	'-'	'-'	'-'
chr1	12672995	A	G	0/1	G	0/1	G	0/1	'-'	'-'	'-'	'-'	'-'	'-'	'-'
chr1	12680863	A	'-'	'-'	'-'	'-'	'-'	'-'	C	0/1	C	0/1	C	0/1	'-'
chr1	12680868	A	'-'	'-'	'-'	'-'	'-'	'-'	T	0/1	T	0/1	T	0/1	'-'
chr1	12685522	G	'-'	'-'	'-'	'-'	'-'	'-'	A	0/1	A	0/1	A	0/1	'-'
chr1	12687931	A	'-'	'-'	'-'	'-'	'-'	'-'	G	0/1	G	0/1	G	0/1	'-'
chr1	12711892	T	'-'	'-'	'-'	'-'	'-'	'-'	G	0/1	G	0/1	G	0/1	'-'
chr1	12718673	G	'-'	'-'	'-'	'-'	'-'	'-'	A	0/1	A	0/1	A	0/1	'-'
chr1	12718674	T	'-'	'-'	'-'	'-'	'-'	'-'	C	0/1	C	0/1	C	0/1	'-'
chr1	12769810	A	C	0/1	C	0/1	C	0/1	'-'	'-'	'-'	'-'	'-'	'-'	'-'
chr1	12798804	C	'-'	'-'	'-'	'-'	'-'	'-'	T	0/1	T	0/1	T	0/1	'-'
chr1	12798807	C	'-'	'-'	'-'	'-'	'-'	'-'	A	0/1	A	0/1	A	0/1	'-'
chr1	12802456	C	T	0/1	T	0/1	T	0/1	T	0/1	T	0/1	T	0/1	'-'
chr1	1281056	T	'-'	'-'	'-'	'-'	'-'	'-'	C	0/1	C	0/1	C	0/1	'-'
chr1	12817959	C	'-'	'-'	'-'	'-'	'-'	'-'	A	0/1	A	0/1	A	0/1	'-'
chr1	12818480	A	'-'	'-'	'-'	'-'	'-'	'-'	G	0/1	G	0/1	G	0/1	'-'
chr1	12818508	C	'-'	'-'	'-'	'-'	'-'	'-'	T	0/1	T	0/1	T	0/1	'-'
chr1	12818524	T	'-'	'-'	'-'	'-'	'-'	'-'	C	0/1	C	0/1	C	0/1	'-'
chr1	12819629	T	C	0/1	C	0/1	C	0/1	'-'	'-'	'-'	'-'	'-'	'-'	'-'
chr1	12819638	C	T	0/1	T	0/1	T	0/1	'-'	'-'	'-'	'-'	'-'	'-'	'-'
chr1	12819639	T	C	0/1	C	0/1	C	0/1	'-'	'-'	'-'	'-'	'-'	'-'	'-'
chr1	12819645	G	A	0/1	A	0/1	A	0/1	'-'	'-'	'-'	'-'	'-'	'-'	'-'
chr1	12851963	T	'-'	'-'	'-'	'-'	'-'	'-'	C	0/1	C	0/1	C	0/1	'-'
chr1	12861966	C	'-'	'-'	'-'	'-'	'-'	'-'	G	0/1	G	0/1	G	0/1	'-'
chr1	12898679	T	'-'	'-'	'-'	'-'	'-'	'-'	G	0/1	G	0/1	G	0/1	'-'
chr1	12910529	A	G	0/1	G	0/1	G	0/1	'-'	'-'	'-'	'-'	'-'	'-'	'-'
chr1	12912615	T	'-'	'-'	'-'	'-'	'-'	'-'	A	0/1	A	0/1	A	0/1	'-'
chr1	12912713	C	'-'	'-'	'-'	'-'	'-'	'-'	T	0/1	T	0/1	T	0/1	'-'
chr1	12924190	C	T	0/1	T	0/1	T	0/1	'-'	'-'	'-'	'-'	'-'	'-'	'-'
chr1	1298590	C	T	0/1	T	0/1	T	0/1	'-'	'-'	'-'	'-'	'-'	'-'	Cs1g02080
chr1	1300217	G	A	0/1	A	0/1	A	0/1	'-'	'-'	'-'	'-'	'-'	'-'	'-'
chr1	13005192	T	C	0/1	C	0/1	C	0/1	'-'	'-'	'-'	'-'	'-'	'-'	'-'
chr1	13023777	A	T	0/1	T	0/1	T	0/1	'-'	'-'	'-'	'-'	'-'	'-'	'-'
chr1	13024244	G	'-'	'-'	'-'	'-'	'-'	'-'	A	0/1	A	0/1	A	0/1	'-'
chr1	13033155	T	C	0/1	C	0/1	C	0/1	'-'	'-'	'-'	'-'	'-'	'-'	'-'
chr1	13040284	G	A	0/1	A	0/1	A	0/1	'-'	'-'	'-'	'-'	'-'	'-'	'-'
chr1	13049117	C	T	0/1	T	0/1	T	0/1	'-'	'-'	'-'	'-'	'-'	'-'	'-'
chr1	13106264	C	'-'	'-'	'-'	'-'	'-'	'-'	A	0/1	A	0/1	A	0/1	'-'
chr1	13110844	C	T	0/1	T	0/1	T	0/1	'-'	'-'	'-'	'-'	'-'	'-'	'-'
chr1	13110895	T	A	0/1	A	0/1	A	0/1	'-'	'-'	'-'	'-'	'-'	'-'	'-'
chr1	13161787	C	A	0/1	A	0/1	A	0/1	'-'	'-'	'-'	'-'	'-'	'-'	'-'
chr1	13167041	T	'-'	'-'	'-'	'-'	'-'	'-'	A	0/1	A	0/1	A	0/1	'-'
chr1	13167094	C	'-'	'-'	'-'	'-'	'-'	'-'	A	0/1	A	0/1	A	0/1	'-'
chr1	13167107	C	'-'	'-'	'-'	'-'	'-'	'-'	T	0/1	T	0/1	T	0/1	'-'
chr1	13167114	T	'-'	'-'	'-'	'-'	'-'	'-'	C	0/1	C	0/1	C	0/1	'-'
chr1	13172035	G	'-'	'-'	'-'	'-'	'-'	'-'	A	0/1	A	0/1	A	0/1	'-'
chr1	13200573	A	'-'	'-'	'-'	'-'	'-'	'-'	C	0/1	C	0/1	C	0/1	'-'
chr1	13200845	T	C	0/1	C	0/1	C	0/1	'-'	'-'	'-'	'-'	'-'	'-'	'-'
chr1	13203689	C	'-'	'-'	'-'	'-'	'-'	'-'	T	0/1	T	0/1	T	0/1	'-'
chr1	13228904	A	'-'	'-'	'-'	'-'	'-'	'-'	G	0/1	G	0/1	G	0/1	'-'
chr1	13228958	T	'-'	'-'	'-'	'-'	'-'	'-'	G	0/1	G	0/1	G	0/1	'-'
chr1	13228976	A	'-'	'-'	'-'	'-'	'-'	'-'	G	0/1	G	0/1	G	0/1	'-'
chr1	1329785	T	'-'	'-'	'-'	'-'	'-'	'-'	C	0/1	C	0/1	C	0/1	'-'
chr1	13300405	A	'-'	'-'	'-'	'-'	'-'	'-'	G	0/1	G	0/1	G	0/1	'-'
chr1	13300454	G	'-'	'-'	'-'	'-'	'-'	'-'	A	0/1	A	0/1	A	0/1	'-'
chr1	13304619	A	'-'	'-'	'-'	'-'	'-'	'-'	G	0/1	G	0/1	G	0/1	'-'
chr1	13304620	A	'-'	'-'	'-'	'-'	'-'	'-'	G	0/1	G	0/1	G	0/1	'-'
chr1	13320487	A	G	0/1	G	0/1	G	0/1	'-'	'-'	'-'	'-'	'-'	'-'	'-'
chr1	13332751	C	'-'	'-'	'-'	'-'	'-'	'-'	T	0/1	T	0/1	T	0/1	'-'
chr1	13339691	T	C	0/1	C	0/1	C	0/1	'-'	'-'	'-'	'-'	'-'	'-'	'-'
chr1	13339701	T	G	0/1	G	0/1	G	0/1	'-'	'-'	'-'	'-'	'-'	'-'	'-'
chr1	13339734	T	C	0/1	C	0/1	C	0/1	'-'	'-'	'-'	'-'	'-'	'-'	'-'
chr1	13339741	C	A	0/1	A	0/1	A	0/1	'-'	'-'	'-'	'-'	'-'	'-'	'-'
chr1	13385647	T	'-'	'-'	'-'	'-'	'-'	'-'	A	0/1	A	0/1	A	0/1	'-'
chr1	13387345	A	'-'	'-'	'-'	'-'	'-'	'-'	G	0/1	G	0/1	G	0/1	'-'
chr1	13420279	G	A	0/1	A	0/1	A	0/1	'-'	'-'	'-'	'-'	'-'	'-'	'-'
chr1	13422816	C	'-'	'-'	'-'	'-'	'-'	'-'	A	0/1	A	0/1	A	0/1	'-'
chr1	13422822	A	'-'	'-'	'-'	'-'	'-'	'-'	C	0/1	C	0/1	C	0/1	'-'
chr1	13430958	C	'-'	'-'	'-'	'-'	'-'	'-'	T	0/1	T	0/1	T	0/1	Cs1g10980
chr1	13433074	T	'-'	'-'	'-'	'-'	'-'	'-'	C	0/1	C	0/1	C	0/1	'-'
chr1	13438677	G	'-'	'-'	'-'	'-'	'-'	'-'	C	0/1	C	0/1	C	0/1	'-'
chr1	13438734	G	'-'	'-'	'-'	'-'	'-'	'-'	A	0/1	A	0/1	A	0/1	'-'
chr1	13449160	C	'-'	'-'	'-'	'-'	'-'	'-'	A	0/1	A	0/1	A	0/1	'-'
chr1	1346182	G	T	0/1	T	0/1	T	0/1	'-'	'-'	'-'	'-'	'-'	'-'	'-'
chr1	13477310	T	'-'	'-'	'-'	'-'	'-'	'-'	C	0/1	C	0/1	C	0/1	'-'
chr1	13501397	C	T	0/1	T	0/1	T	0/1	'-'	'-'	'-'	'-'	'-'	'-'	'-'
chr1	1351745	A	C	0/1	C	0/1	C	0/1	'-'	'-'	'-'	'-'	'-'	'-'	'-'
chr1	1351761	G	C	0/1	C	0/1	C	0/1	'-'	'-'	'-'	'-'	'-'	'-'	'-'
chr1	13537748	T	C	0/1	C	0/1	C	0/1	'-'	'-'	'-'	'-'	'-'	'-'	Cs1g11040
chr1	13569902	C	T	0/1	T	0/1	T	0/1	T	0/1	T	0/1	T	0/1	'-'
chr1	13610716	G	'-'	'-'	'-'	'-'	'-'	'-'	A	0/1	A	0/1	A	0/1	'-'
chr1	13610783	A	C	0/1	C	0/1	C	0/1	'-'	'-'	'-'	'-'	'-'	'-'	'-'
chr1	13610963	C	T	0/1	T	0/1	T	0/1	'-'	'-'	'-'	'-'	'-'	'-'	'-'
chr1	13633036	G	'-'	'-'	'-'	'-'	'-'	'-'	A	0/1	A	0/1	A	0/1	'-'
chr1	13637442	T	'-'	'-'	'-'	'-'	'-'	'-'	G	0/1	G	0/1	G	0/1	'-'
chr1	13641265	A	'-'	'-'	'-'	'-'	'-'	'-'	C	0/1	C	0/1	C	0/1	'-'
chr1	13646024	A	G	0/1	G	0/1	G	0/1	'-'	'-'	'-'	'-'	'-'	'-'	'-'
chr1	13647966	C	'-'	'-'	'-'	'-'	'-'	'-'	T	0/1	T	0/1	T	0/1	'-'
chr1	13660929	G	A	0/1	A	0/1	A	0/1	'-'	'-'	'-'	'-'	'-'	'-'	'-'
chr1	13663043	C	T	0/1	T	0/1	T	0/1	'-'	'-'	'-'	'-'	'-'	'-'	'-'
chr1	13679686	C	'-'	'-'	'-'	'-'	'-'	'-'	A	0/1	A	0/1	A	0/1	'-'
chr1	13682113	T	'-'	'-'	'-'	'-'	'-'	'-'	C	0/1	C	0/1	C	0/1	'-'
chr1	13682129	T	'-'	'-'	'-'	'-'	'-'	'-'	C	0/1	C	0/1	C	0/1	'-'
chr1	13689196	T	C	0/1	C	0/1	C	0/1	'-'	'-'	'-'	'-'	'-'	'-'	'-'
chr1	13696358	G	'-'	'-'	'-'	'-'	'-'	'-'	A	0/1	A	0/1	A	0/1	'-'
chr1	13701449	T	A	0/1	A	0/1	A	0/1	'-'	'-'	'-'	'-'	'-'	'-'	'-'
chr1	13708450	G	A	0/1	A	0/1	A	0/1	'-'	'-'	'-'	'-'	'-'	'-'	'-'
chr1	13708464	G	A	0/1	A	0/1	A	0/1	'-'	'-'	'-'	'-'	'-'	'-'	'-'
chr1	13708986	A	'-'	'-'	'-'	'-'	'-'	'-'	T	0/1	T	0/1	T	0/1	'-'
chr1	13724807	T	A	0/1	A	0/1	A	0/1	'-'	'-'	'-'	'-'	'-'	'-'	'-'
chr1	13755951	A	G	0/1	G	0/1	G	0/1	'-'	'-'	'-'	'-'	'-'	'-'	'-'
chr1	13756685	A	'-'	'-'	'-'	'-'	'-'	'-'	G	0/1	G	0/1	G	0/1	'-'
chr1	13756686	T	'-'	'-'	'-'	'-'	'-'	'-'	C	0/1	C	0/1	C	0/1	'-'
chr1	13772348	G	A	0/1	A	0/1	A	0/1	'-'	'-'	'-'	'-'	'-'	'-'	'-'
chr1	13804065	G	'-'	'-'	'-'	'-'	'-'	'-'	A	0/1	A	0/1	A	0/1	Cs1g11280
chr1	1383146	A	'-'	'-'	'-'	'-'	'-'	'-'	T	0/1	T	0/1	T	0/1	'-'
chr1	1383151	C	'-'	'-'	'-'	'-'	'-'	'-'	T	0/1	T	0/1	T	0/1	'-'
chr1	1383157	C	'-'	'-'	'-'	'-'	'-'	'-'	T	0/1	T	0/1	T	0/1	'-'
chr1	1383161	G	'-'	'-'	'-'	'-'	'-'	'-'	A	0/1	A	0/1	A	0/1	'-'
chr1	1383167	C	'-'	'-'	'-'	'-'	'-'	'-'	T	0/1	T	0/1	T	0/1	'-'
chr1	1385048	T	'-'	'-'	'-'	'-'	'-'	'-'	C	0/1	C	0/1	C	0/1	'-'
chr1	1390012	T	C	0/1	C	0/1	C	0/1	'-'	'-'	'-'	'-'	'-'	'-'	'-'
chr1	1390023	T	C	0/1	C	0/1	C	0/1	'-'	'-'	'-'	'-'	'-'	'-'	'-'
chr1	13924761	C	T	0/1	T	0/1	T	0/1	'-'	'-'	'-'	'-'	'-'	'-'	'-'
chr1	13924762	C	A	0/1	A	0/1	A	0/1	'-'	'-'	'-'	'-'	'-'	'-'	'-'
chr1	13947978	A	'-'	'-'	'-'	'-'	'-'	'-'	C	0/1	C	0/1	C	0/1	Cs1g11390
chr1	13947988	C	'-'	'-'	'-'	'-'	'-'	'-'	T	0/1	T	0/1	T	0/1	Cs1g11390
chr1	13960308	C	G	0/1	G	0/1	G	0/1	'-'	'-'	'-'	'-'	'-'	'-'	'-'
chr1	13960334	G	T	0/1	T	0/1	T	0/1	'-'	'-'	'-'	'-'	'-'	'-'	'-'
chr1	13965789	A	'-'	'-'	'-'	'-'	'-'	'-'	G	0/1	G	0/1	G	0/1	'-'
chr1	13998704	G	A	0/1	A	0/1	A	0/1	'-'	'-'	'-'	'-'	'-'	'-'	'-'
chr1	14003473	C	'-'	'-'	'-'	'-'	'-'	'-'	T	0/1	T	0/1	T	0/1	'-'
chr1	14003682	C	'-'	'-'	'-'	'-'	'-'	'-'	T	0/1	T	0/1	T	0/1	'-'
chr1	14083330	G	C	0/1	C	0/1	C	0/1	'-'	'-'	'-'	'-'	'-'	'-'	'-'
chr1	14083353	A	T	0/1	T	0/1	T	0/1	'-'	'-'	'-'	'-'	'-'	'-'	'-'
chr1	14085476	A	'-'	'-'	'-'	'-'	'-'	'-'	C	0/1	C	0/1	C	0/1	'-'
chr1	14085487	G	'-'	'-'	'-'	'-'	'-'	'-'	A	0/1	A	0/1	A	0/1	'-'
chr1	14085522	A	'-'	'-'	'-'	'-'	'-'	'-'	T	0/1	T	0/1	T	0/1	'-'
chr1	14086849	G	A	0/1	A	0/1	A	0/1	'-'	'-'	'-'	'-'	'-'	'-'	'-'
chr1	14089620	T	A	0/1	A	0/1	A	0/1	'-'	'-'	'-'	'-'	'-'	'-'	'-'
chr1	14110729	T	C	0/1	C	0/1	C	0/1	'-'	'-'	'-'	'-'	'-'	'-'	'-'
chr1	14112865	A	G	0/1	G	0/1	G	0/1	'-'	'-'	'-'	'-'	'-'	'-'	'-'
chr1	14132631	C	'-'	'-'	'-'	'-'	'-'	'-'	T	0/1	T	0/1	T	0/1	'-'
chr1	14135993	C	T	0/1	T	0/1	T	0/1	'-'	'-'	'-'	'-'	'-'	'-'	'-'
chr1	14136084	C	'-'	'-'	'-'	'-'	'-'	'-'	T	0/1	T	0/1	T	0/1	'-'
chr1	14136089	A	'-'	'-'	'-'	'-'	'-'	'-'	C	0/1	C	0/1	C	0/1	'-'
chr1	14136203	G	'-'	'-'	'-'	'-'	'-'	'-'	A	0/1	A	0/1	A	0/1	'-'
chr1	14136235	C	'-'	'-'	'-'	'-'	'-'	'-'	T	0/1	T	0/1	T	0/1	'-'
chr1	14136249	T	'-'	'-'	'-'	'-'	'-'	'-'	C	0/1	C	0/1	C	0/1	'-'
chr1	14155447	G	'-'	'-'	'-'	'-'	'-'	'-'	A	0/1	A	0/1	A	0/1	'-'
chr1	14156881	T	'-'	'-'	'-'	'-'	'-'	'-'	C	0/1	C	0/1	C	0/1	'-'
chr1	14163124	A	'-'	'-'	'-'	'-'	'-'	'-'	G	0/1	G	0/1	G	0/1	'-'
chr1	14163131	C	'-'	'-'	'-'	'-'	'-'	'-'	T	0/1	T	0/1	T	0/1	'-'
chr1	1417523	T	'-'	'-'	'-'	'-'	'-'	'-'	C	0/1	C	0/1	C	0/1	'-'
chr1	1417588	C	'-'	'-'	'-'	'-'	'-'	'-'	T	0/1	T	0/1	T	0/1	'-'
chr1	14178632	T	C	0/1	C	0/1	C	0/1	'-'	'-'	'-'	'-'	'-'	'-'	'-'
chr1	14179130	C	T	0/1	T	0/1	T	0/1	'-'	'-'	'-'	'-'	'-'	'-'	'-'
chr1	14183576	A	'-'	'-'	'-'	'-'	'-'	'-'	G	0/1	G	0/1	G	0/1	'-'
chr1	14183577	T	'-'	'-'	'-'	'-'	'-'	'-'	G	0/1	G	0/1	G	0/1	'-'
chr1	14198641	T	C	0/1	C	0/1	C	0/1	'-'	'-'	'-'	'-'	'-'	'-'	'-'
chr1	1422709	C	'-'	'-'	'-'	'-'	'-'	'-'	T	0/1	T	0/1	T	0/1	'-'
chr1	1422884	G	A	0/1	A	0/1	A	0/1	'-'	'-'	'-'	'-'	'-'	'-'	'-'
chr1	14230032	A	C	0/1	C	0/1	C	0/1	'-'	'-'	'-'	'-'	'-'	'-'	'-'
chr1	14237825	G	A	0/1	A	0/1	A	0/1	'-'	'-'	'-'	'-'	'-'	'-'	'-'
chr1	14240186	G	C	0/1	C	0/1	C	0/1	'-'	'-'	'-'	'-'	'-'	'-'	'-'
chr1	14240191	T	G	0/1	G	0/1	G	0/1	'-'	'-'	'-'	'-'	'-'	'-'	'-'
chr1	14240209	A	G	0/1	G	0/1	G	0/1	'-'	'-'	'-'	'-'	'-'	'-'	'-'
chr1	14268775	T	'-'	'-'	'-'	'-'	'-'	'-'	C	0/1	C	0/1	C	0/1	'-'
chr1	14284711	T	C	0/1	C	0/1	C	0/1	'-'	'-'	'-'	'-'	'-'	'-'	'-'
chr1	14284718	T	C	0/1	C	0/1	C	0/1	'-'	'-'	'-'	'-'	'-'	'-'	'-'
chr1	14284744	A	G	0/1	G	0/1	G	0/1	'-'	'-'	'-'	'-'	'-'	'-'	'-'
chr1	14302984	T	A	0/1	A	0/1	A	0/1	'-'	'-'	'-'	'-'	'-'	'-'	'-'
chr1	14312579	G	T	0/1	T	0/1	T	0/1	T	0/1	T	0/1	T	0/1	'-'
chr1	1431836	A	C	0/1	C	0/1	C	0/1	'-'	'-'	'-'	'-'	'-'	'-'	'-'
chr1	1431840	G	A	0/1	A	0/1	A	0/1	'-'	'-'	'-'	'-'	'-'	'-'	'-'
chr1	14370346	C	A	0/1	A	0/1	A	0/1	'-'	'-'	'-'	'-'	'-'	'-'	'-'
chr1	14377977	A	'-'	'-'	'-'	'-'	'-'	'-'	C	0/1	C	0/1	C	0/1	'-'
chr1	1447279	T	C	0/1	C	0/1	C	0/1	'-'	'-'	'-'	'-'	'-'	'-'	'-'
chr1	14490152	T	'-'	'-'	'-'	'-'	'-'	'-'	C	0/1	C	0/1	C	0/1	'-'
chr1	14499597	C	T	0/1	T	0/1	T	0/1	'-'	'-'	'-'	'-'	'-'	'-'	'-'
chr1	14524506	A	'-'	'-'	'-'	'-'	'-'	'-'	G	0/1	G	0/1	G	0/1	'-'
chr1	14544816	A	'-'	'-'	'-'	'-'	'-'	'-'	C	0/1	C	0/1	C	0/1	'-'
chr1	14545024	C	'-'	'-'	'-'	'-'	'-'	'-'	T	0/1	T	0/1	T	0/1	'-'
chr1	14575049	A	'-'	'-'	'-'	'-'	'-'	'-'	G	0/1	G	0/1	G	0/1	'-'
chr1	14575061	G	'-'	'-'	'-'	'-'	'-'	'-'	T	0/1	T	0/1	T	0/1	'-'
chr1	14578734	C	'-'	'-'	'-'	'-'	'-'	'-'	G	0/1	G	0/1	G	0/1	'-'
chr1	14586341	G	'-'	'-'	'-'	'-'	'-'	'-'	T	0/1	T	0/1	T	0/1	'-'
chr1	14600169	T	'-'	'-'	'-'	'-'	'-'	'-'	C	0/1	C	0/1	C	0/1	'-'
chr1	14602922	C	'-'	'-'	'-'	'-'	'-'	'-'	T	0/1	T	0/1	T	0/1	'-'
chr1	14612540	G	A	0/1	A	0/1	A	0/1	'-'	'-'	'-'	'-'	'-'	'-'	'-'
chr1	14612549	G	A	0/1	A	0/1	A	0/1	'-'	'-'	'-'	'-'	'-'	'-'	'-'
chr1	14620743	A	'-'	'-'	'-'	'-'	'-'	'-'	T	0/1	T	0/1	T	0/1	Cs1g11920
chr1	14624087	C	'-'	'-'	'-'	'-'	'-'	'-'	T	0/1	T	0/1	T	0/1	'-'
chr1	14677824	A	G	0/1	G	0/1	G	0/1	'-'	'-'	'-'	'-'	'-'	'-'	'-'
chr1	14699670	A	'-'	'-'	'-'	'-'	'-'	'-'	C	0/1	C	0/1	C	0/1	'-'
chr1	14699775	C	'-'	'-'	'-'	'-'	'-'	'-'	T	0/1	T	0/1	T	0/1	'-'
chr1	14700977	A	'-'	'-'	'-'	'-'	'-'	'-'	G	0/1	G	0/1	G	0/1	Cs1g11950
chr1	14701064	C	'-'	'-'	'-'	'-'	'-'	'-'	A	0/1	A	0/1	A	0/1	'-'
chr1	14743560	C	T	0/1	T	0/1	T	0/1	'-'	'-'	'-'	'-'	'-'	'-'	'-'
chr1	14808863	A	'-'	'-'	'-'	'-'	'-'	'-'	G	0/1	G	0/1	G	0/1	'-'
chr1	14817656	T	C	0/1	C	0/1	C	0/1	'-'	'-'	'-'	'-'	'-'	'-'	'-'
chr1	14817662	A	G	0/1	G	0/1	G	0/1	'-'	'-'	'-'	'-'	'-'	'-'	'-'
chr1	14865762	C	'-'	'-'	'-'	'-'	'-'	'-'	A	0/1	A	0/1	A	0/1	'-'
chr1	14865763	T	'-'	'-'	'-'	'-'	'-'	'-'	A	0/1	A	0/1	A	0/1	'-'
chr1	14866770	T	C	0/1	C	0/1	C	0/1	'-'	'-'	'-'	'-'	'-'	'-'	'-'
chr1	14870527	C	'-'	'-'	'-'	'-'	'-'	'-'	A	0/1	A	0/1	A	0/1	'-'
chr1	14936274	T	A	0/1	A	0/1	A	0/1	'-'	'-'	'-'	'-'	'-'	'-'	'-'
chr1	14965402	A	G	0/1	G	0/1	G	0/1	'-'	'-'	'-'	'-'	'-'	'-'	'-'
chr1	14966045	T	C	0/1	C	0/1	C	0/1	'-'	'-'	'-'	'-'	'-'	'-'	'-'
chr1	14966055	A	G	0/1	G	0/1	G	0/1	'-'	'-'	'-'	'-'	'-'	'-'	'-'
chr1	14966058	C	A	0/1	A	0/1	A	0/1	'-'	'-'	'-'	'-'	'-'	'-'	'-'
chr1	14968093	A	G	0/1	G	0/1	G	0/1	'-'	'-'	'-'	'-'	'-'	'-'	'-'
chr1	14968115	C	A	0/1	A	0/1	A	0/1	'-'	'-'	'-'	'-'	'-'	'-'	'-'
chr1	14971336	A	G	0/1	G	0/1	G	0/1	'-'	'-'	'-'	'-'	'-'	'-'	'-'
chr1	14975350	T	G	0/1	G	0/1	G	0/1	'-'	'-'	'-'	'-'	'-'	'-'	'-'
chr1	14995201	C	'-'	'-'	'-'	'-'	'-'	'-'	A	0/1	A	0/1	A	0/1	'-'
chr1	15006429	C	G	0/1	G	0/1	G	0/1	'-'	'-'	'-'	'-'	'-'	'-'	'-'
chr1	15006606	C	'-'	'-'	'-'	'-'	'-'	'-'	A	0/1	A	0/1	A	0/1	'-'
chr1	15008684	C	G	0/1	G	0/1	G	0/1	G	0/1	G	0/1	G	0/1	'-'
chr1	15013396	C	'-'	'-'	'-'	'-'	'-'	'-'	T	0/1	T	0/1	T	0/1	'-'
chr1	15014321	A	'-'	'-'	'-'	'-'	'-'	'-'	G	0/1	G	0/1	G	0/1	'-'
chr1	15014963	T	'-'	'-'	'-'	'-'	'-'	'-'	C	0/1	C	0/1	C	0/1	'-'
chr1	15022227	T	'-'	'-'	'-'	'-'	'-'	'-'	C	0/1	C	0/1	C	0/1	'-'
chr1	15023358	G	'-'	'-'	'-'	'-'	'-'	'-'	A	0/1	A	0/1	A	0/1	'-'
chr1	15023365	G	'-'	'-'	'-'	'-'	'-'	'-'	A	0/1	A	0/1	A	0/1	'-'
chr1	15026078	G	A	0/1	A	0/1	A	0/1	'-'	'-'	'-'	'-'	'-'	'-'	'-'
chr1	15028784	C	'-'	'-'	'-'	'-'	'-'	'-'	A	0/1	A	0/1	A	0/1	'-'
chr1	15039071	A	T	0/1	T	0/1	T	0/1	'-'	'-'	'-'	'-'	'-'	'-'	Cs1g12120
chr1	15039073	G	T	0/1	T	0/1	T	0/1	'-'	'-'	'-'	'-'	'-'	'-'	Cs1g12120
chr1	15039074	C	A	0/1	A	0/1	A	0/1	'-'	'-'	'-'	'-'	'-'	'-'	Cs1g12120
chr1	15043148	C	'-'	'-'	'-'	'-'	'-'	'-'	A	0/1	A	0/1	A	0/1	'-'
chr1	15048583	G	'-'	'-'	'-'	'-'	'-'	'-'	A	0/1	A	0/1	A	0/1	'-'
chr1	15059500	A	G	0/1	G	0/1	G	0/1	'-'	'-'	'-'	'-'	'-'	'-'	'-'
chr1	15085127	A	C	0/1	C	0/1	C	0/1	'-'	'-'	'-'	'-'	'-'	'-'	'-'
chr1	15091002	A	'-'	'-'	'-'	'-'	'-'	'-'	C	0/1	C	0/1	C	0/1	'-'
chr1	15096973	A	T	0/1	T	0/1	T	0/1	'-'	'-'	'-'	'-'	'-'	'-'	'-'
chr1	1509835	T	C	0/1	C	0/1	C	0/1	C	0/1	C	0/1	C	0/1	'-'
chr1	15100974	G	'-'	'-'	'-'	'-'	'-'	'-'	A	0/1	A	0/1	A	0/1	'-'
chr1	15103396	A	'-'	'-'	'-'	'-'	'-'	'-'	T	0/1	T	0/1	T	0/1	'-'
chr1	15103401	C	'-'	'-'	'-'	'-'	'-'	'-'	G	0/1	G	0/1	G	0/1	'-'
chr1	15103816	G	'-'	'-'	'-'	'-'	'-'	'-'	A	0/1	A	0/1	A	0/1	Cs1g12150
chr1	15103823	A	'-'	'-'	'-'	'-'	'-'	'-'	C	0/1	C	0/1	C	0/1	Cs1g12150
chr1	1510488	T	C	0/1	C	0/1	C	0/1	'-'	'-'	'-'	'-'	'-'	'-'	'-'
chr1	15110757	G	T	0/1	T	0/1	T	0/1	'-'	'-'	'-'	'-'	'-'	'-'	'-'
chr1	15110782	C	A	0/1	A	0/1	A	0/1	'-'	'-'	'-'	'-'	'-'	'-'	'-'
chr1	15110788	A	T	0/1	T	0/1	T	0/1	'-'	'-'	'-'	'-'	'-'	'-'	'-'
chr1	15110822	T	G	0/1	G	0/1	G	0/1	'-'	'-'	'-'	'-'	'-'	'-'	'-'
chr1	15110823	A	G	0/1	G	0/1	G	0/1	'-'	'-'	'-'	'-'	'-'	'-'	'-'
chr1	15126155	A	'-'	'-'	'-'	'-'	'-'	'-'	T	0/1	T	0/1	T	0/1	'-'
chr1	15136951	T	'-'	'-'	'-'	'-'	'-'	'-'	C	0/1	C	0/1	C	0/1	'-'
chr1	15137023	G	'-'	'-'	'-'	'-'	'-'	'-'	A	0/1	A	0/1	A	0/1	'-'
chr1	15137031	A	'-'	'-'	'-'	'-'	'-'	'-'	C	0/1	C	0/1	C	0/1	'-'
chr1	15142575	G	'-'	'-'	'-'	'-'	'-'	'-'	A	0/1	A	0/1	A	0/1	'-'
chr1	15142593	C	T	0/1	T	0/1	T	0/1	'-'	'-'	'-'	'-'	'-'	'-'	'-'
chr1	15165300	C	'-'	'-'	'-'	'-'	'-'	'-'	T	0/1	T	0/1	T	0/1	Cs1g12160
chr1	15169054	A	'-'	'-'	'-'	'-'	'-'	'-'	C	0/1	C	0/1	C	0/1	'-'
chr1	15174528	T	'-'	'-'	'-'	'-'	'-'	'-'	A	0/1	A	0/1	A	0/1	'-'
chr1	15185253	T	C	0/1	C	0/1	C	0/1	'-'	'-'	'-'	'-'	'-'	'-'	Cs1g12180
chr1	15185597	C	T	0/1	T	0/1	T	0/1	'-'	'-'	'-'	'-'	'-'	'-'	Cs1g12180
chr1	15191463	A	'-'	'-'	'-'	'-'	'-'	'-'	T	0/1	T	0/1	T	0/1	'-'
chr1	1519536	A	G	0/1	G	0/1	G	0/1	'-'	'-'	'-'	'-'	'-'	'-'	'-'
chr1	15195566	T	'-'	'-'	'-'	'-'	'-'	'-'	C	0/1	C	0/1	C	0/1	'-'
chr1	15197229	T	G	0/1	G	0/1	G	0/1	'-'	'-'	'-'	'-'	'-'	'-'	'-'
chr1	15197258	A	T	0/1	T	0/1	T	0/1	'-'	'-'	'-'	'-'	'-'	'-'	'-'
chr1	15203305	C	'-'	'-'	'-'	'-'	'-'	'-'	T	0/1	T	0/1	T	0/1	'-'
chr1	15205797	G	A	0/1	A	0/1	A	0/1	'-'	'-'	'-'	'-'	'-'	'-'	'-'
chr1	15230825	C	'-'	'-'	'-'	'-'	'-'	'-'	T	0/1	T	0/1	T	0/1	Cs1g12220
chr1	15237317	G	A	0/1	A	0/1	A	0/1	'-'	'-'	'-'	'-'	'-'	'-'	'-'
chr1	15277825	G	T	0/1	T	0/1	T	0/1	'-'	'-'	'-'	'-'	'-'	'-'	'-'
chr1	15277835	G	A	0/1	A	0/1	A	0/1	'-'	'-'	'-'	'-'	'-'	'-'	'-'
chr1	15277858	T	G	0/1	G	0/1	G	0/1	'-'	'-'	'-'	'-'	'-'	'-'	'-'
chr1	15277867	C	T	0/1	T	0/1	T	0/1	'-'	'-'	'-'	'-'	'-'	'-'	'-'
chr1	15294422	T	C	0/1	C	0/1	C	0/1	'-'	'-'	'-'	'-'	'-'	'-'	'-'
chr1	15294431	A	G	0/1	G	0/1	G	0/1	'-'	'-'	'-'	'-'	'-'	'-'	'-'
chr1	15313023	C	'-'	'-'	'-'	'-'	'-'	'-'	T	0/1	T	0/1	T	0/1	'-'
chr1	15313059	C	'-'	'-'	'-'	'-'	'-'	'-'	T	0/1	T	0/1	T	0/1	'-'
chr1	15313068	C	'-'	'-'	'-'	'-'	'-'	'-'	T	0/1	T	0/1	T	0/1	'-'
chr1	1531549	A	G	0/1	G	0/1	G	0/1	'-'	'-'	'-'	'-'	'-'	'-'	'-'
chr1	15323033	A	G	0/1	G	0/1	G	0/1	'-'	'-'	'-'	'-'	'-'	'-'	'-'
chr1	15335822	A	'-'	'-'	'-'	'-'	'-'	'-'	C	0/1	C	0/1	C	0/1	'-'
chr1	1533985	T	A	0/1	A	0/1	A	0/1	A	0/1	A	0/1	A	0/1	'-'
chr1	1535978	C	T	0/1	T	0/1	T	0/1	'-'	'-'	'-'	'-'	'-'	'-'	'-'
chr1	15372451	G	A	0/1	A	0/1	A	0/1	'-'	'-'	'-'	'-'	'-'	'-'	'-'
chr1	15380798	A	T	0/1	T	0/1	T	0/1	'-'	'-'	'-'	'-'	'-'	'-'	'-'
chr1	15380803	A	G	0/1	G	0/1	G	0/1	'-'	'-'	'-'	'-'	'-'	'-'	'-'
chr1	15380809	C	T	0/1	T	0/1	T	0/1	'-'	'-'	'-'	'-'	'-'	'-'	'-'
chr1	1538528	A	G	0/1	G	0/1	G	0/1	'-'	'-'	'-'	'-'	'-'	'-'	'-'
chr1	1538532	A	C	0/1	C	0/1	C	0/1	'-'	'-'	'-'	'-'	'-'	'-'	'-'
chr1	1538534	G	A	0/1	A	0/1	A	0/1	'-'	'-'	'-'	'-'	'-'	'-'	'-'
chr1	15400455	C	T	0/1	T	0/1	T	0/1	'-'	'-'	'-'	'-'	'-'	'-'	'-'
chr1	15400473	A	C	0/1	C	0/1	C	0/1	'-'	'-'	'-'	'-'	'-'	'-'	'-'
chr1	15401201	G	A	0/1	A	0/1	A	0/1	'-'	'-'	'-'	'-'	'-'	'-'	'-'
chr1	15401203	T	C	0/1	C	0/1	C	0/1	'-'	'-'	'-'	'-'	'-'	'-'	'-'
chr1	15401207	G	A	0/1	A	0/1	A	0/1	'-'	'-'	'-'	'-'	'-'	'-'	'-'
chr1	15413282	G	'-'	'-'	'-'	'-'	'-'	'-'	A	0/1	A	0/1	A	0/1	'-'
chr1	15423502	T	'-'	'-'	'-'	'-'	'-'	'-'	A	0/1	A	0/1	A	0/1	'-'
chr1	15423503	T	'-'	'-'	'-'	'-'	'-'	'-'	G	0/1	G	0/1	G	0/1	'-'
chr1	15438693	C	T	0/1	T	0/1	T	0/1	'-'	'-'	'-'	'-'	'-'	'-'	'-'
chr1	15447888	T	'-'	'-'	'-'	'-'	'-'	'-'	C	0/1	C	0/1	C	0/1	'-'
chr1	15469501	A	'-'	'-'	'-'	'-'	'-'	'-'	G	0/1	G	0/1	G	0/1	'-'
chr1	15484208	T	C	0/1	C	0/1	C	0/1	'-'	'-'	'-'	'-'	'-'	'-'	'-'
chr1	15484245	G	T	0/1	T	0/1	T	0/1	'-'	'-'	'-'	'-'	'-'	'-'	'-'
chr1	15484246	A	T	0/1	T	0/1	T	0/1	'-'	'-'	'-'	'-'	'-'	'-'	'-'
chr1	15485359	G	A	0/1	A	0/1	A	0/1	'-'	'-'	'-'	'-'	'-'	'-'	'-'
chr1	15529749	T	'-'	'-'	'-'	'-'	'-'	'-'	C	0/1	C	0/1	C	0/1	'-'
chr1	15585060	C	T	0/1	T	0/1	T	0/1	'-'	'-'	'-'	'-'	'-'	'-'	'-'
chr1	15588567	T	A	0/1	A	0/1	A	0/1	'-'	'-'	'-'	'-'	'-'	'-'	'-'
chr1	15588571	A	T	0/1	T	0/1	T	0/1	'-'	'-'	'-'	'-'	'-'	'-'	'-'
chr1	15591162	A	C	0/1	C	0/1	C	0/1	'-'	'-'	'-'	'-'	'-'	'-'	'-'
chr1	15591197	C	G	0/1	G	0/1	G	0/1	'-'	'-'	'-'	'-'	'-'	'-'	'-'
chr1	15591204	A	G	0/1	G	0/1	G	0/1	'-'	'-'	'-'	'-'	'-'	'-'	'-'
chr1	15591205	T	A	0/1	A	0/1	A	0/1	'-'	'-'	'-'	'-'	'-'	'-'	'-'
chr1	15591216	T	C	0/1	C	0/1	C	0/1	'-'	'-'	'-'	'-'	'-'	'-'	'-'
chr1	15593664	T	A	0/1	A	0/1	A	0/1	'-'	'-'	'-'	'-'	'-'	'-'	'-'
chr1	155949	A	'-'	'-'	'-'	'-'	'-'	'-'	G	0/1	G	0/1	G	0/1	'-'
chr1	155966	A	'-'	'-'	'-'	'-'	'-'	'-'	C	0/1	C	0/1	C	0/1	'-'
chr1	15596882	A	T	0/1	T	0/1	T	0/1	'-'	'-'	'-'	'-'	'-'	'-'	'-'
chr1	15596890	T	G	0/1	G	0/1	G	0/1	'-'	'-'	'-'	'-'	'-'	'-'	'-'
chr1	15596916	C	T	0/1	T	0/1	T	0/1	'-'	'-'	'-'	'-'	'-'	'-'	'-'
chr1	15596918	C	A	0/1	A	0/1	A	0/1	'-'	'-'	'-'	'-'	'-'	'-'	'-'
chr1	15596925	T	C	0/1	C	0/1	C	0/1	'-'	'-'	'-'	'-'	'-'	'-'	'-'
chr1	15598183	T	G	0/1	G	0/1	G	0/1	'-'	'-'	'-'	'-'	'-'	'-'	'-'
chr1	15605219	C	'-'	'-'	'-'	'-'	'-'	'-'	T	0/1	T	0/1	T	0/1	'-'
chr1	15613297	A	C	0/1	C	0/1	C	0/1	'-'	'-'	'-'	'-'	'-'	'-'	'-'
chr1	15614260	T	A	0/1	A	0/1	A	0/1	'-'	'-'	'-'	'-'	'-'	'-'	'-'
chr1	15625514	T	C	0/1	C	0/1	C	0/1	'-'	'-'	'-'	'-'	'-'	'-'	'-'
chr1	15626724	T	'-'	'-'	'-'	'-'	'-'	'-'	C	0/1	C	0/1	C	0/1	'-'
chr1	15629207	A	'-'	'-'	'-'	'-'	'-'	'-'	C	0/1	C	0/1	C	0/1	'-'
chr1	15630866	T	'-'	'-'	'-'	'-'	'-'	'-'	G	0/1	G	0/1	G	0/1	'-'
chr1	15641611	T	'-'	'-'	'-'	'-'	'-'	'-'	A	0/1	A	0/1	A	0/1	'-'
chr1	15641641	T	'-'	'-'	'-'	'-'	'-'	'-'	C	0/1	C	0/1	C	0/1	'-'
chr1	15641645	C	'-'	'-'	'-'	'-'	'-'	'-'	A	0/1	A	0/1	A	0/1	'-'
chr1	15641650	C	'-'	'-'	'-'	'-'	'-'	'-'	T	0/1	T	0/1	T	0/1	'-'
chr1	15641658	G	'-'	'-'	'-'	'-'	'-'	'-'	A	0/1	A	0/1	A	0/1	'-'
chr1	15646012	C	'-'	'-'	'-'	'-'	'-'	'-'	T	0/1	T	0/1	T	0/1	'-'
chr1	15646024	T	'-'	'-'	'-'	'-'	'-'	'-'	C	0/1	C	0/1	C	0/1	'-'
chr1	15665376	A	'-'	'-'	'-'	'-'	'-'	'-'	T	0/1	T	0/1	T	0/1	'-'
chr1	15680233	T	C	0/1	C	0/1	C	0/1	'-'	'-'	'-'	'-'	'-'	'-'	'-'
chr1	15687964	C	'-'	'-'	'-'	'-'	'-'	'-'	A	0/1	A	0/1	A	0/1	'-'
chr1	15705331	G	A	0/1	A	0/1	A	0/1	'-'	'-'	'-'	'-'	'-'	'-'	'-'
chr1	15705371	C	T	0/1	T	0/1	T	0/1	'-'	'-'	'-'	'-'	'-'	'-'	'-'
chr1	15705550	A	'-'	'-'	'-'	'-'	'-'	'-'	G	0/1	G	0/1	G	0/1	'-'
chr1	1570670	T	C	0/1	C	0/1	C	0/1	'-'	'-'	'-'	'-'	'-'	'-'	'-'
chr1	15707077	A	G	0/1	G	0/1	G	0/1	'-'	'-'	'-'	'-'	'-'	'-'	'-'
chr1	15707078	C	T	0/1	T	0/1	T	0/1	'-'	'-'	'-'	'-'	'-'	'-'	'-'
chr1	15711047	G	T	0/1	T	0/1	T	0/1	'-'	'-'	'-'	'-'	'-'	'-'	'-'
chr1	15711051	T	G	0/1	G	0/1	G	0/1	'-'	'-'	'-'	'-'	'-'	'-'	'-'
chr1	15729840	T	C	0/1	C	0/1	C	0/1	'-'	'-'	'-'	'-'	'-'	'-'	'-'
chr1	15751240	G	A	0/1	A	0/1	A	0/1	'-'	'-'	'-'	'-'	'-'	'-'	'-'
chr1	15751675	T	C	0/1	C	0/1	C	0/1	'-'	'-'	'-'	'-'	'-'	'-'	'-'
chr1	15751683	G	A	0/1	A	0/1	A	0/1	'-'	'-'	'-'	'-'	'-'	'-'	'-'
chr1	15751732	T	C	0/1	C	0/1	C	0/1	'-'	'-'	'-'	'-'	'-'	'-'	'-'
chr1	15751736	T	C	0/1	C	0/1	C	0/1	'-'	'-'	'-'	'-'	'-'	'-'	'-'
chr1	15751738	C	T	0/1	T	0/1	T	0/1	'-'	'-'	'-'	'-'	'-'	'-'	'-'
chr1	15754203	A	'-'	'-'	'-'	'-'	'-'	'-'	G	0/1	G	0/1	G	0/1	'-'
chr1	15762632	T	C	0/1	C	0/1	C	0/1	'-'	'-'	'-'	'-'	'-'	'-'	'-'
chr1	15768476	C	'-'	'-'	'-'	'-'	'-'	'-'	T	0/1	T	0/1	T	0/1	'-'
chr1	15769200	A	'-'	'-'	'-'	'-'	'-'	'-'	G	0/1	G	0/1	G	0/1	'-'
chr1	15772975	C	'-'	'-'	'-'	'-'	'-'	'-'	T	0/1	T	0/1	T	0/1	'-'
chr1	15772980	T	'-'	'-'	'-'	'-'	'-'	'-'	G	0/1	G	0/1	G	0/1	'-'
chr1	15774233	G	'-'	'-'	'-'	'-'	'-'	'-'	A	0/1	A	0/1	A	0/1	'-'
chr1	15774240	A	'-'	'-'	'-'	'-'	'-'	'-'	T	0/1	T	0/1	T	0/1	'-'
chr1	15774907	T	'-'	'-'	'-'	'-'	'-'	'-'	C	0/1	C	0/1	C	0/1	'-'
chr1	15782997	A	G	0/1	G	0/1	G	0/1	'-'	'-'	'-'	'-'	'-'	'-'	'-'
chr1	15784615	A	'-'	'-'	'-'	'-'	'-'	'-'	C	0/1	C	0/1	C	0/1	'-'
chr1	15804169	C	T	0/1	T	0/1	T	0/1	'-'	'-'	'-'	'-'	'-'	'-'	'-'
chr1	15843730	G	'-'	'-'	'-'	'-'	'-'	'-'	A	0/1	A	0/1	A	0/1	'-'
chr1	15843747	A	'-'	'-'	'-'	'-'	'-'	'-'	G	0/1	G	0/1	G	0/1	'-'
chr1	15864214	A	T	0/1	T	0/1	T	0/1	'-'	'-'	'-'	'-'	'-'	'-'	'-'
chr1	15868667	G	'-'	'-'	'-'	'-'	'-'	'-'	A	0/1	A	0/1	A	0/1	'-'
chr1	15868963	T	C	0/1	C	0/1	C	0/1	'-'	'-'	'-'	'-'	'-'	'-'	'-'
chr1	15876296	C	'-'	'-'	'-'	'-'	'-'	'-'	A	0/1	A	0/1	A	0/1	'-'
chr1	15876910	A	'-'	'-'	'-'	'-'	'-'	'-'	G	0/1	G	0/1	G	0/1	'-'
chr1	15879229	G	'-'	'-'	'-'	'-'	'-'	'-'	A	0/1	A	0/1	A	0/1	'-'
chr1	1588314	G	A	0/1	A	0/1	A	0/1	'-'	'-'	'-'	'-'	'-'	'-'	'-'
chr1	1588329	C	T	0/1	T	0/1	T	0/1	'-'	'-'	'-'	'-'	'-'	'-'	'-'
chr1	1588531	G	'-'	'-'	'-'	'-'	'-'	'-'	A	0/1	A	0/1	A	0/1	'-'
chr1	15890677	T	'-'	'-'	'-'	'-'	'-'	'-'	C	0/1	C	0/1	C	0/1	'-'
chr1	15921991	A	'-'	'-'	'-'	'-'	'-'	'-'	G	0/1	G	0/1	G	0/1	'-'
chr1	1592330	G	T	0/1	T	0/1	T	0/1	'-'	'-'	'-'	'-'	'-'	'-'	'-'
chr1	1592341	T	C	0/1	C	0/1	C	0/1	'-'	'-'	'-'	'-'	'-'	'-'	'-'
chr1	15929949	C	T	0/1	T	0/1	T	0/1	'-'	'-'	'-'	'-'	'-'	'-'	'-'
chr1	15929958	C	T	0/1	T	0/1	T	0/1	'-'	'-'	'-'	'-'	'-'	'-'	'-'
chr1	15963301	A	'-'	'-'	'-'	'-'	'-'	'-'	T	0/1	T	0/1	T	0/1	'-'
chr1	16006118	T	C	0/1	C	0/1	C	0/1	'-'	'-'	'-'	'-'	'-'	'-'	'-'
chr1	16008130	C	'-'	'-'	'-'	'-'	'-'	'-'	T	0/1	T	0/1	T	0/1	'-'
chr1	16012779	T	'-'	'-'	'-'	'-'	'-'	'-'	C	0/1	C	0/1	C	0/1	'-'
chr1	16016955	A	G	0/1	G	0/1	G	0/1	'-'	'-'	'-'	'-'	'-'	'-'	'-'
chr1	16030461	T	'-'	'-'	'-'	'-'	'-'	'-'	G	0/1	G	0/1	G	0/1	Cs1g12960
chr1	16030804	G	'-'	'-'	'-'	'-'	'-'	'-'	A	0/1	A	0/1	A	0/1	'-'
chr1	16030960	C	T	0/1	T	0/1	T	0/1	'-'	'-'	'-'	'-'	'-'	'-'	Cs1g12960
chr1	16031784	T	'-'	'-'	'-'	'-'	'-'	'-'	C	0/1	C	0/1	C	0/1	'-'
chr1	16031785	C	'-'	'-'	'-'	'-'	'-'	'-'	A	0/1	A	0/1	A	0/1	'-'
chr1	16090613	C	'-'	'-'	'-'	'-'	'-'	'-'	T	0/1	T	0/1	T	0/1	'-'
chr1	16093990	C	A	0/1	A	0/1	A	0/1	'-'	'-'	'-'	'-'	'-'	'-'	'-'
chr1	16093991	T	A	0/1	A	0/1	A	0/1	'-'	'-'	'-'	'-'	'-'	'-'	'-'
chr1	16095090	A	'-'	'-'	'-'	'-'	'-'	'-'	T	0/1	T	0/1	T	0/1	'-'
chr1	16095096	G	'-'	'-'	'-'	'-'	'-'	'-'	A	0/1	A	0/1	A	0/1	'-'
chr1	16095305	G	'-'	'-'	'-'	'-'	'-'	'-'	A	0/1	A	0/1	A	0/1	'-'
chr1	16121220	C	'-'	'-'	'-'	'-'	'-'	'-'	T	0/1	T	0/1	T	0/1	Cs1g13010
chr1	16126989	C	T	0/1	T	0/1	T	0/1	'-'	'-'	'-'	'-'	'-'	'-'	'-'
chr1	16130952	A	G	0/1	G	0/1	G	0/1	'-'	'-'	'-'	'-'	'-'	'-'	'-'
chr1	16130959	T	G	0/1	G	0/1	G	0/1	'-'	'-'	'-'	'-'	'-'	'-'	'-'
chr1	16133052	T	'-'	'-'	'-'	'-'	'-'	'-'	C	0/1	C	0/1	C	0/1	'-'
chr1	1614464	G	C	0/1	C	0/1	C	0/1	'-'	'-'	'-'	'-'	'-'	'-'	'-'
chr1	16154682	A	'-'	'-'	'-'	'-'	'-'	'-'	T	0/1	T	0/1	T	0/1	Cs1g13030
chr1	16154745	C	'-'	'-'	'-'	'-'	'-'	'-'	T	0/1	T	0/1	T	0/1	Cs1g13030
chr1	16154761	A	'-'	'-'	'-'	'-'	'-'	'-'	G	0/1	G	0/1	G	0/1	Cs1g13030
chr1	16161438	A	'-'	'-'	'-'	'-'	'-'	'-'	T	0/1	T	0/1	T	0/1	'-'
chr1	16173912	C	T	0/1	T	0/1	T	0/1	'-'	'-'	'-'	'-'	'-'	'-'	'-'
chr1	16184967	C	'-'	'-'	'-'	'-'	'-'	'-'	A	0/1	A	0/1	A	0/1	'-'
chr1	16211008	G	'-'	'-'	'-'	'-'	'-'	'-'	A	0/1	A	0/1	A	0/1	'-'
chr1	16211018	T	'-'	'-'	'-'	'-'	'-'	'-'	C	0/1	C	0/1	C	0/1	'-'
chr1	16218067	C	'-'	'-'	'-'	'-'	'-'	'-'	A	0/1	A	0/1	A	0/1	'-'
chr1	16218093	C	'-'	'-'	'-'	'-'	'-'	'-'	A	0/1	A	0/1	A	0/1	'-'
chr1	16259042	G	T	0/1	T	0/1	T	0/1	'-'	'-'	'-'	'-'	'-'	'-'	'-'
chr1	16261933	G	A	0/1	A	0/1	A	0/1	'-'	'-'	'-'	'-'	'-'	'-'	'-'
chr1	16265385	T	C	0/1	C	0/1	C	0/1	'-'	'-'	'-'	'-'	'-'	'-'	'-'
chr1	16265407	G	A	0/1	A	0/1	A	0/1	'-'	'-'	'-'	'-'	'-'	'-'	'-'
chr1	1627603	A	G	0/1	G	0/1	G	0/1	'-'	'-'	'-'	'-'	'-'	'-'	'-'
chr1	16280485	G	A	0/1	A	0/1	A	0/1	'-'	'-'	'-'	'-'	'-'	'-'	'-'
chr1	16281935	T	'-'	'-'	'-'	'-'	'-'	'-'	A	0/1	A	0/1	A	0/1	'-'
chr1	16281943	G	'-'	'-'	'-'	'-'	'-'	'-'	C	0/1	C	0/1	C	0/1	'-'
chr1	16281944	G	'-'	'-'	'-'	'-'	'-'	'-'	A	0/1	A	0/1	A	0/1	'-'
chr1	16281956	C	'-'	'-'	'-'	'-'	'-'	'-'	T	0/1	T	0/1	T	0/1	'-'
chr1	16323334	G	'-'	'-'	'-'	'-'	'-'	'-'	A	0/1	A	0/1	A	0/1	'-'
chr1	16350792	T	C	0/1	C	0/1	C	0/1	'-'	'-'	'-'	'-'	'-'	'-'	'-'
chr1	16361288	T	C	0/1	C	0/1	C	0/1	'-'	'-'	'-'	'-'	'-'	'-'	'-'
chr1	16372582	C	T	0/1	T	0/1	T	0/1	'-'	'-'	'-'	'-'	'-'	'-'	'-'
chr1	16377053	C	'-'	'-'	'-'	'-'	'-'	'-'	T	0/1	T	0/1	T	0/1	'-'
chr1	16404857	A	'-'	'-'	'-'	'-'	'-'	'-'	T	0/1	T	0/1	T	0/1	'-'
chr1	16417577	A	'-'	'-'	'-'	'-'	'-'	'-'	T	0/1	T	0/1	T	0/1	'-'
chr1	16428428	A	'-'	'-'	'-'	'-'	'-'	'-'	C	0/1	C	0/1	C	0/1	'-'
chr1	16457037	C	T	0/1	T	0/1	T	0/1	'-'	'-'	'-'	'-'	'-'	'-'	'-'
chr1	16466496	G	A	0/1	A	0/1	A	0/1	'-'	'-'	'-'	'-'	'-'	'-'	'-'
chr1	16482389	T	C	0/1	C	0/1	C	0/1	'-'	'-'	'-'	'-'	'-'	'-'	'-'
chr1	16499496	G	C	0/1	C	0/1	C	0/1	'-'	'-'	'-'	'-'	'-'	'-'	Cs1g13430
chr1	16499512	G	A	0/1	A	0/1	A	0/1	'-'	'-'	'-'	'-'	'-'	'-'	Cs1g13430
chr1	16502418	A	'-'	'-'	'-'	'-'	'-'	'-'	G	0/1	G	0/1	G	0/1	'-'
chr1	16502425	A	'-'	'-'	'-'	'-'	'-'	'-'	G	0/1	G	0/1	G	0/1	'-'
chr1	16502426	A	'-'	'-'	'-'	'-'	'-'	'-'	T	0/1	T	0/1	T	0/1	'-'
chr1	16502441	T	'-'	'-'	'-'	'-'	'-'	'-'	C	0/1	C	0/1	C	0/1	'-'
chr1	16523059	G	'-'	'-'	'-'	'-'	'-'	'-'	A	0/1	A	0/1	A	0/1	'-'
chr1	16523441	G	'-'	'-'	'-'	'-'	'-'	'-'	A	0/1	A	0/1	A	0/1	'-'
chr1	16523459	T	'-'	'-'	'-'	'-'	'-'	'-'	G	0/1	G	0/1	G	0/1	'-'
chr1	16524097	A	G	0/1	G	0/1	G	0/1	'-'	'-'	'-'	'-'	'-'	'-'	'-'
chr1	16524098	A	G	0/1	G	0/1	G	0/1	'-'	'-'	'-'	'-'	'-'	'-'	'-'
chr1	16524099	G	A	0/1	A	0/1	A	0/1	'-'	'-'	'-'	'-'	'-'	'-'	'-'
chr1	16524102	G	T	0/1	T	0/1	T	0/1	'-'	'-'	'-'	'-'	'-'	'-'	'-'
chr1	16524114	G	A	0/1	A	0/1	A	0/1	'-'	'-'	'-'	'-'	'-'	'-'	'-'
chr1	16524737	G	'-'	'-'	'-'	'-'	'-'	'-'	C	0/1	C	0/1	C	0/1	'-'
chr1	16527974	C	'-'	'-'	'-'	'-'	'-'	'-'	T	0/1	T	0/1	T	0/1	Cs1g13460
chr1	16528210	T	G	0/1	G	0/1	G	0/1	'-'	'-'	'-'	'-'	'-'	'-'	Cs1g13460
chr1	16545150	C	T	0/1	T	0/1	T	0/1	'-'	'-'	'-'	'-'	'-'	'-'	'-'
chr1	16545153	T	C	0/1	C	0/1	C	0/1	'-'	'-'	'-'	'-'	'-'	'-'	'-'
chr1	16558535	T	C	0/1	C	0/1	C	0/1	'-'	'-'	'-'	'-'	'-'	'-'	'-'
chr1	16559342	A	'-'	'-'	'-'	'-'	'-'	'-'	C	0/1	C	0/1	C	0/1	'-'
chr1	16606324	C	'-'	'-'	'-'	'-'	'-'	'-'	G	0/1	G	0/1	G	0/1	'-'
chr1	16606378	C	'-'	'-'	'-'	'-'	'-'	'-'	T	0/1	T	0/1	T	0/1	'-'
chr1	16632923	C	'-'	'-'	'-'	'-'	'-'	'-'	T	0/1	T	0/1	T	0/1	'-'
chr1	16632926	C	'-'	'-'	'-'	'-'	'-'	'-'	G	0/1	G	0/1	G	0/1	'-'
chr1	16638699	A	T	0/1	T	0/1	T	0/1	'-'	'-'	'-'	'-'	'-'	'-'	'-'
chr1	16638706	C	T	0/1	T	0/1	T	0/1	'-'	'-'	'-'	'-'	'-'	'-'	'-'
chr1	16646756	G	A	0/1	A	0/1	A	0/1	'-'	'-'	'-'	'-'	'-'	'-'	'-'
chr1	16646757	A	G	0/1	G	0/1	G	0/1	'-'	'-'	'-'	'-'	'-'	'-'	'-'
chr1	16647863	C	'-'	'-'	'-'	'-'	'-'	'-'	T	0/1	T	0/1	T	0/1	'-'
chr1	16647865	T	'-'	'-'	'-'	'-'	'-'	'-'	C	0/1	C	0/1	C	0/1	'-'
chr1	16647867	C	'-'	'-'	'-'	'-'	'-'	'-'	G	0/1	G	0/1	G	0/1	'-'
chr1	16647901	T	'-'	'-'	'-'	'-'	'-'	'-'	C	0/1	C	0/1	C	0/1	'-'
chr1	16647903	C	'-'	'-'	'-'	'-'	'-'	'-'	T	0/1	T	0/1	T	0/1	'-'
chr1	16647913	C	'-'	'-'	'-'	'-'	'-'	'-'	T	0/1	T	0/1	T	0/1	'-'
chr1	16647936	A	'-'	'-'	'-'	'-'	'-'	'-'	G	0/1	G	0/1	G	0/1	'-'
chr1	16648743	C	'-'	'-'	'-'	'-'	'-'	'-'	A	0/1	A	0/1	A	0/1	'-'
chr1	16649468	A	G	0/1	G	0/1	G	0/1	'-'	'-'	'-'	'-'	'-'	'-'	'-'
chr1	16667660	T	A	0/1	A	0/1	A	0/1	'-'	'-'	'-'	'-'	'-'	'-'	'-'
chr1	16667674	G	A	0/1	A	0/1	A	0/1	'-'	'-'	'-'	'-'	'-'	'-'	'-'
chr1	16701293	A	G	0/1	G	0/1	G	0/1	'-'	'-'	'-'	'-'	'-'	'-'	'-'
chr1	16705382	C	'-'	'-'	'-'	'-'	'-'	'-'	T	0/1	T	0/1	T	0/1	'-'
chr1	16708305	G	A	0/1	A	0/1	A	0/1	'-'	'-'	'-'	'-'	'-'	'-'	'-'
chr1	16743344	T	C	0/1	C	0/1	C	0/1	'-'	'-'	'-'	'-'	'-'	'-'	'-'
chr1	16792624	G	'-'	'-'	'-'	'-'	'-'	'-'	A	0/1	A	0/1	A	0/1	'-'
chr1	16792766	G	'-'	'-'	'-'	'-'	'-'	'-'	A	0/1	A	0/1	A	0/1	'-'
chr1	16851283	T	'-'	'-'	'-'	'-'	'-'	'-'	C	0/1	C	0/1	C	0/1	'-'
chr1	16860104	A	G	0/1	G	0/1	G	0/1	'-'	'-'	'-'	'-'	'-'	'-'	'-'
chr1	16860146	T	C	0/1	C	0/1	C	0/1	'-'	'-'	'-'	'-'	'-'	'-'	'-'
chr1	16860147	A	G	0/1	G	0/1	G	0/1	'-'	'-'	'-'	'-'	'-'	'-'	'-'
chr1	16860154	G	A	0/1	A	0/1	A	0/1	'-'	'-'	'-'	'-'	'-'	'-'	'-'
chr1	16860168	G	A	0/1	A	0/1	A	0/1	'-'	'-'	'-'	'-'	'-'	'-'	'-'
chr1	16890176	C	'-'	'-'	'-'	'-'	'-'	'-'	T	0/1	T	0/1	T	0/1	'-'
chr1	16890182	C	'-'	'-'	'-'	'-'	'-'	'-'	T	0/1	T	0/1	T	0/1	'-'
chr1	16890508	A	'-'	'-'	'-'	'-'	'-'	'-'	G	0/1	G	0/1	G	0/1	'-'
chr1	16890540	T	'-'	'-'	'-'	'-'	'-'	'-'	C	0/1	C	0/1	C	0/1	'-'
chr1	16893783	A	C	0/1	C	0/1	C	0/1	'-'	'-'	'-'	'-'	'-'	'-'	Cs1g13790
chr1	16899937	G	C	0/1	C	0/1	C	0/1	'-'	'-'	'-'	'-'	'-'	'-'	'-'
chr1	1690699	C	T	0/1	T	0/1	T	0/1	'-'	'-'	'-'	'-'	'-'	'-'	'-'
chr1	16915408	G	'-'	'-'	'-'	'-'	'-'	'-'	A	0/1	A	0/1	A	0/1	'-'
chr1	16936689	G	A	0/1	A	0/1	A	0/1	'-'	'-'	'-'	'-'	'-'	'-'	'-'
chr1	16936695	A	G	0/1	G	0/1	G	0/1	'-'	'-'	'-'	'-'	'-'	'-'	'-'
chr1	16936740	C	A	0/1	A	0/1	A	0/1	'-'	'-'	'-'	'-'	'-'	'-'	'-'
chr1	16936741	C	T	0/1	T	0/1	T	0/1	'-'	'-'	'-'	'-'	'-'	'-'	'-'
chr1	16936742	G	A	0/1	A	0/1	A	0/1	'-'	'-'	'-'	'-'	'-'	'-'	'-'
chr1	16936746	G	A	0/1	A	0/1	A	0/1	'-'	'-'	'-'	'-'	'-'	'-'	'-'
chr1	16985942	A	G	0/1	G	0/1	G	0/1	'-'	'-'	'-'	'-'	'-'	'-'	'-'
chr1	16985953	G	A	0/1	A	0/1	A	0/1	'-'	'-'	'-'	'-'	'-'	'-'	'-'
chr1	17020572	T	'-'	'-'	'-'	'-'	'-'	'-'	A	0/1	A	0/1	A	0/1	'-'
chr1	1702290	A	'-'	'-'	'-'	'-'	'-'	'-'	G	0/1	G	0/1	G	0/1	'-'
chr1	17029347	A	G	0/1	G	0/1	G	0/1	'-'	'-'	'-'	'-'	'-'	'-'	'-'
chr1	17040859	C	G	0/1	G	0/1	G	0/1	'-'	'-'	'-'	'-'	'-'	'-'	'-'
chr1	17040866	A	G	0/1	G	0/1	G	0/1	'-'	'-'	'-'	'-'	'-'	'-'	'-'
chr1	17041499	T	'-'	'-'	'-'	'-'	'-'	'-'	C	0/1	C	0/1	C	0/1	'-'
chr1	17050552	T	G	0/1	G	0/1	G	0/1	'-'	'-'	'-'	'-'	'-'	'-'	Cs1g13910
chr1	17050553	T	A	0/1	A	0/1	A	0/1	'-'	'-'	'-'	'-'	'-'	'-'	Cs1g13910
chr1	17050554	T	C	0/1	C	0/1	C	0/1	'-'	'-'	'-'	'-'	'-'	'-'	Cs1g13910
chr1	17056060	G	'-'	'-'	'-'	'-'	'-'	'-'	A	0/1	A	0/1	A	0/1	'-'
chr1	1706029	G	C	0/1	C	0/1	C	0/1	'-'	'-'	'-'	'-'	'-'	'-'	'-'
chr1	17070729	G	'-'	'-'	'-'	'-'	'-'	'-'	A	0/1	A	0/1	A	0/1	'-'
chr1	17088536	G	T	0/1	T	0/1	T	0/1	'-'	'-'	'-'	'-'	'-'	'-'	'-'
chr1	17099302	C	T	0/1	T	0/1	T	0/1	'-'	'-'	'-'	'-'	'-'	'-'	'-'
chr1	17099954	T	'-'	'-'	'-'	'-'	'-'	'-'	G	0/1	G	0/1	G	0/1	'-'
chr1	17110220	G	A	0/1	A	0/1	A	0/1	'-'	'-'	'-'	'-'	'-'	'-'	'-'
chr1	17110233	T	C	0/1	C	0/1	C	0/1	'-'	'-'	'-'	'-'	'-'	'-'	'-'
chr1	17110237	A	G	0/1	G	0/1	G	0/1	'-'	'-'	'-'	'-'	'-'	'-'	'-'
chr1	1712410	C	'-'	'-'	'-'	'-'	'-'	'-'	T	0/1	T	0/1	T	0/1	'-'
chr1	17132629	T	C	0/1	C	0/1	C	0/1	'-'	'-'	'-'	'-'	'-'	'-'	'-'
chr1	17165794	C	T	0/1	T	0/1	T	0/1	'-'	'-'	'-'	'-'	'-'	'-'	Cs1g14020
chr1	17165797	C	T	0/1	T	0/1	T	0/1	'-'	'-'	'-'	'-'	'-'	'-'	Cs1g14020
chr1	17169416	A	'-'	'-'	'-'	'-'	'-'	'-'	G	0/1	G	0/1	G	0/1	'-'
chr1	17174746	C	'-'	'-'	'-'	'-'	'-'	'-'	T	0/1	T	0/1	T	0/1	'-'
chr1	17175684	T	C	0/1	C	0/1	C	0/1	'-'	'-'	'-'	'-'	'-'	'-'	Cs1g14030
chr1	17175685	G	C	0/1	C	0/1	C	0/1	'-'	'-'	'-'	'-'	'-'	'-'	Cs1g14030
chr1	17208969	A	T	0/1	T	0/1	T	0/1	'-'	'-'	'-'	'-'	'-'	'-'	'-'
chr1	17210239	G	'-'	'-'	'-'	'-'	'-'	'-'	A	0/1	A	0/1	A	0/1	'-'
chr1	17211228	C	'-'	'-'	'-'	'-'	'-'	'-'	A	0/1	A	0/1	A	0/1	'-'
chr1	17230648	A	'-'	'-'	'-'	'-'	'-'	'-'	G	0/1	G	0/1	G	0/1	'-'
chr1	17232666	C	'-'	'-'	'-'	'-'	'-'	'-'	A	0/1	A	0/1	A	0/1	'-'
chr1	17244910	A	G	0/1	G	0/1	G	0/1	'-'	'-'	'-'	'-'	'-'	'-'	'-'
chr1	17251085	T	C	0/1	C	0/1	C	0/1	'-'	'-'	'-'	'-'	'-'	'-'	'-'
chr1	17252652	C	'-'	'-'	'-'	'-'	'-'	'-'	A	0/1	A	0/1	A	0/1	'-'
chr1	17266351	T	C	0/1	C	0/1	C	0/1	'-'	'-'	'-'	'-'	'-'	'-'	'-'
chr1	17266958	A	C	0/1	C	0/1	C	0/1	'-'	'-'	'-'	'-'	'-'	'-'	'-'
chr1	17278467	C	T	0/1	T	0/1	T	0/1	'-'	'-'	'-'	'-'	'-'	'-'	'-'
chr1	17281669	T	'-'	'-'	'-'	'-'	'-'	'-'	G	0/1	G	0/1	G	0/1	'-'
chr1	1729953	T	'-'	'-'	'-'	'-'	'-'	'-'	G	0/1	G	0/1	G	0/1	'-'
chr1	1729954	G	'-'	'-'	'-'	'-'	'-'	'-'	C	0/1	C	0/1	C	0/1	'-'
chr1	1730004	C	'-'	'-'	'-'	'-'	'-'	'-'	T	0/1	T	0/1	T	0/1	'-'
chr1	1730011	G	'-'	'-'	'-'	'-'	'-'	'-'	A	0/1	A	0/1	A	0/1	'-'
chr1	1730017	A	'-'	'-'	'-'	'-'	'-'	'-'	G	0/1	G	0/1	G	0/1	'-'
chr1	1730030	T	'-'	'-'	'-'	'-'	'-'	'-'	G	0/1	G	0/1	G	0/1	'-'
chr1	17301414	G	A	0/1	A	0/1	A	0/1	'-'	'-'	'-'	'-'	'-'	'-'	Cs1g14150
chr1	17307469	A	G	0/1	G	0/1	G	0/1	G	0/1	G	0/1	G	0/1	'-'
chr1	1730961	T	A	0/1	A	0/1	A	0/1	'-'	'-'	'-'	'-'	'-'	'-'	'-'
chr1	17309768	A	'-'	'-'	'-'	'-'	'-'	'-'	C	0/1	C	0/1	C	0/1	'-'
chr1	17327047	A	T	0/1	T	0/1	T	0/1	'-'	'-'	'-'	'-'	'-'	'-'	'-'
chr1	17357165	T	C	0/1	C	0/1	C	0/1	'-'	'-'	'-'	'-'	'-'	'-'	'-'
chr1	17372429	T	A	0/1	A	0/1	A	0/1	'-'	'-'	'-'	'-'	'-'	'-'	'-'
chr1	17384253	G	T	0/1	T	0/1	T	0/1	'-'	'-'	'-'	'-'	'-'	'-'	'-'
chr1	17396991	G	T	0/1	T	0/1	T	0/1	'-'	'-'	'-'	'-'	'-'	'-'	'-'
chr1	17397193	C	T	0/1	T	0/1	T	0/1	'-'	'-'	'-'	'-'	'-'	'-'	'-'
chr1	17398522	T	C	0/1	C	0/1	C	0/1	'-'	'-'	'-'	'-'	'-'	'-'	'-'
chr1	17408813	G	T	0/1	T	0/1	T	0/1	'-'	'-'	'-'	'-'	'-'	'-'	'-'
chr1	1742621	T	C	0/1	C	0/1	C	0/1	'-'	'-'	'-'	'-'	'-'	'-'	'-'
chr1	1742622	T	C	0/1	C	0/1	C	0/1	'-'	'-'	'-'	'-'	'-'	'-'	'-'
chr1	17441355	A	'-'	'-'	'-'	'-'	'-'	'-'	G	0/1	G	0/1	G	0/1	'-'
chr1	17473973	C	A	0/1	A	0/1	A	0/1	'-'	'-'	'-'	'-'	'-'	'-'	Cs1g14220
chr1	17475621	G	'-'	'-'	'-'	'-'	'-'	'-'	A	0/1	A	0/1	A	0/1	'-'
chr1	17475732	G	'-'	'-'	'-'	'-'	'-'	'-'	A	0/1	A	0/1	A	0/1	'-'
chr1	17485987	T	'-'	'-'	'-'	'-'	'-'	'-'	C	0/1	C	0/1	C	0/1	'-'
chr1	17501453	T	'-'	'-'	'-'	'-'	'-'	'-'	C	0/1	C	0/1	C	0/1	'-'
chr1	17528682	G	'-'	'-'	'-'	'-'	'-'	'-'	C	0/1	C	0/1	C	0/1	'-'
chr1	17528706	T	'-'	'-'	'-'	'-'	'-'	'-'	A	0/1	A	0/1	A	0/1	'-'
chr1	17530341	T	'-'	'-'	'-'	'-'	'-'	'-'	A	0/1	A	0/1	A	0/1	Cs1g14260
chr1	17530346	T	'-'	'-'	'-'	'-'	'-'	'-'	C	0/1	C	0/1	C	0/1	Cs1g14260
chr1	17535963	T	C	0/1	C	0/1	C	0/1	'-'	'-'	'-'	'-'	'-'	'-'	Cs1g14260
chr1	1754290	C	'-'	'-'	'-'	'-'	'-'	'-'	T	0/1	T	0/1	T	0/1	'-'
chr1	1754308	T	'-'	'-'	'-'	'-'	'-'	'-'	C	0/1	C	0/1	C	0/1	'-'
chr1	1754310	C	'-'	'-'	'-'	'-'	'-'	'-'	T	0/1	T	0/1	T	0/1	'-'
chr1	1754313	T	'-'	'-'	'-'	'-'	'-'	'-'	C	0/1	C	0/1	C	0/1	'-'
chr1	17548358	C	T	0/1	T	0/1	T	0/1	'-'	'-'	'-'	'-'	'-'	'-'	'-'
chr1	17548373	G	A	0/1	A	0/1	A	0/1	'-'	'-'	'-'	'-'	'-'	'-'	'-'
chr1	17548378	G	A	0/1	A	0/1	A	0/1	'-'	'-'	'-'	'-'	'-'	'-'	'-'
chr1	17548404	G	A	0/1	A	0/1	A	0/1	'-'	'-'	'-'	'-'	'-'	'-'	'-'
chr1	17554548	G	'-'	'-'	'-'	'-'	'-'	'-'	A	0/1	A	0/1	A	0/1	'-'
chr1	17555085	C	'-'	'-'	'-'	'-'	'-'	'-'	T	0/1	T	0/1	T	0/1	'-'
chr1	17555142	T	'-'	'-'	'-'	'-'	'-'	'-'	C	0/1	C	0/1	C	0/1	'-'
chr1	17575893	T	C	0/1	C	0/1	C	0/1	'-'	'-'	'-'	'-'	'-'	'-'	'-'
chr1	17575919	T	C	0/1	C	0/1	C	0/1	'-'	'-'	'-'	'-'	'-'	'-'	'-'
chr1	1758249	A	'-'	'-'	'-'	'-'	'-'	'-'	T	0/1	T	0/1	T	0/1	'-'
chr1	1758264	A	'-'	'-'	'-'	'-'	'-'	'-'	T	0/1	T	0/1	T	0/1	'-'
chr1	17590145	C	T	0/1	T	0/1	T	0/1	'-'	'-'	'-'	'-'	'-'	'-'	'-'
chr1	17590615	A	T	0/1	T	0/1	T	0/1	'-'	'-'	'-'	'-'	'-'	'-'	'-'
chr1	17590628	C	T	0/1	T	0/1	T	0/1	'-'	'-'	'-'	'-'	'-'	'-'	'-'
chr1	17616343	T	'-'	'-'	'-'	'-'	'-'	'-'	G	0/1	G	0/1	G	0/1	'-'
chr1	17645442	A	G	0/1	G	0/1	G	0/1	'-'	'-'	'-'	'-'	'-'	'-'	'-'
chr1	17655436	A	'-'	'-'	'-'	'-'	'-'	'-'	T	0/1	T	0/1	T	0/1	'-'
chr1	17655459	A	'-'	'-'	'-'	'-'	'-'	'-'	G	0/1	G	0/1	G	0/1	'-'
chr1	17675752	G	A	0/1	A	0/1	A	0/1	'-'	'-'	'-'	'-'	'-'	'-'	'-'
chr1	17685003	G	'-'	'-'	'-'	'-'	'-'	'-'	C	0/1	C	0/1	C	0/1	'-'
chr1	1770191	A	'-'	'-'	'-'	'-'	'-'	'-'	G	0/1	G	0/1	G	0/1	'-'
chr1	17706513	G	'-'	'-'	'-'	'-'	'-'	'-'	A	0/1	A	0/1	A	0/1	'-'
chr1	17729272	T	C	0/1	C	0/1	C	0/1	'-'	'-'	'-'	'-'	'-'	'-'	'-'
chr1	1773186	T	C	0/1	C	0/1	C	0/1	'-'	'-'	'-'	'-'	'-'	'-'	'-'
chr1	17733436	C	'-'	'-'	'-'	'-'	'-'	'-'	T	0/1	T	0/1	T	0/1	'-'
chr1	17734744	T	C	0/1	C	0/1	C	0/1	'-'	'-'	'-'	'-'	'-'	'-'	'-'
chr1	17744077	T	'-'	'-'	'-'	'-'	'-'	'-'	C	0/1	C	0/1	C	0/1	'-'
chr1	17757216	A	G	0/1	G	0/1	G	0/1	'-'	'-'	'-'	'-'	'-'	'-'	'-'
chr1	17762940	G	C	0/1	C	0/1	C	0/1	'-'	'-'	'-'	'-'	'-'	'-'	'-'
chr1	17784898	T	'-'	'-'	'-'	'-'	'-'	'-'	A	0/1	A	0/1	A	0/1	'-'
chr1	17791063	C	'-'	'-'	'-'	'-'	'-'	'-'	T	0/1	T	0/1	T	0/1	'-'
chr1	17825137	A	T	0/1	T	0/1	T	0/1	'-'	'-'	'-'	'-'	'-'	'-'	'-'
chr1	17825458	T	C	0/1	C	0/1	C	0/1	'-'	'-'	'-'	'-'	'-'	'-'	'-'
chr1	17826535	G	A	0/1	A	0/1	A	0/1	'-'	'-'	'-'	'-'	'-'	'-'	'-'
chr1	17828684	A	G	0/1	G	0/1	G	0/1	'-'	'-'	'-'	'-'	'-'	'-'	'-'
chr1	17832837	C	T	0/1	T	0/1	T	0/1	T	0/1	T	0/1	T	0/1	'-'
chr1	17834102	G	A	0/1	A	0/1	A	0/1	'-'	'-'	'-'	'-'	'-'	'-'	'-'
chr1	17857098	C	T	0/1	T	0/1	T	0/1	'-'	'-'	'-'	'-'	'-'	'-'	Cs1g14550
chr1	178640	T	'-'	'-'	'-'	'-'	'-'	'-'	G	0/1	G	0/1	G	0/1	'-'
chr1	178668	T	'-'	'-'	'-'	'-'	'-'	'-'	A	0/1	A	0/1	A	0/1	'-'
chr1	17872250	A	T	0/1	T	0/1	T	0/1	'-'	'-'	'-'	'-'	'-'	'-'	'-'
chr1	17898282	A	'-'	'-'	'-'	'-'	'-'	'-'	T	0/1	T	0/1	T	0/1	'-'
chr1	17930823	C	A	0/1	A	0/1	A	0/1	'-'	'-'	'-'	'-'	'-'	'-'	'-'
chr1	17950353	A	T	0/1	T	0/1	T	0/1	'-'	'-'	'-'	'-'	'-'	'-'	'-'
chr1	17950370	C	A	0/1	A	0/1	A	0/1	'-'	'-'	'-'	'-'	'-'	'-'	'-'
chr1	17950375	C	A	0/1	A	0/1	A	0/1	'-'	'-'	'-'	'-'	'-'	'-'	'-'
chr1	17950383	T	A	0/1	A	0/1	A	0/1	'-'	'-'	'-'	'-'	'-'	'-'	'-'
chr1	17955441	G	A	0/1	A	0/1	A	0/1	'-'	'-'	'-'	'-'	'-'	'-'	'-'
chr1	17956096	G	A	0/1	A	0/1	A	0/1	'-'	'-'	'-'	'-'	'-'	'-'	'-'
chr1	17965439	T	C	0/1	C	0/1	C	0/1	'-'	'-'	'-'	'-'	'-'	'-'	'-'
chr1	17970955	C	T	0/1	T	0/1	T	0/1	'-'	'-'	'-'	'-'	'-'	'-'	'-'
chr1	17970958	A	G	0/1	G	0/1	G	0/1	'-'	'-'	'-'	'-'	'-'	'-'	'-'
chr1	17992970	T	C	0/1	C	0/1	C	0/1	'-'	'-'	'-'	'-'	'-'	'-'	'-'
chr1	17996285	G	C	0/1	C	0/1	C	0/1	'-'	'-'	'-'	'-'	'-'	'-'	'-'
chr1	17998494	G	A	0/1	A	0/1	A	0/1	'-'	'-'	'-'	'-'	'-'	'-'	'-'
chr1	17998508	T	C	0/1	C	0/1	C	0/1	'-'	'-'	'-'	'-'	'-'	'-'	'-'
chr1	18004867	T	G	0/1	G	0/1	G	0/1	'-'	'-'	'-'	'-'	'-'	'-'	'-'
chr1	18004879	A	G	0/1	G	0/1	G	0/1	'-'	'-'	'-'	'-'	'-'	'-'	'-'
chr1	18013087	G	A	0/1	A	0/1	A	0/1	'-'	'-'	'-'	'-'	'-'	'-'	'-'
chr1	18013089	C	T	0/1	T	0/1	T	0/1	'-'	'-'	'-'	'-'	'-'	'-'	'-'
chr1	18015248	C	'-'	'-'	'-'	'-'	'-'	'-'	T	0/1	T	0/1	T	0/1	'-'
chr1	18015272	T	'-'	'-'	'-'	'-'	'-'	'-'	G	0/1	G	0/1	G	0/1	'-'
chr1	18020511	A	G	0/1	G	0/1	G	0/1	'-'	'-'	'-'	'-'	'-'	'-'	'-'
chr1	18020522	T	C	0/1	C	0/1	C	0/1	'-'	'-'	'-'	'-'	'-'	'-'	'-'
chr1	18043261	A	'-'	'-'	'-'	'-'	'-'	'-'	G	0/1	G	0/1	G	0/1	'-'
chr1	18059102	C	G	0/1	G	0/1	G	0/1	'-'	'-'	'-'	'-'	'-'	'-'	'-'
chr1	18061055	G	'-'	'-'	'-'	'-'	'-'	'-'	A	0/1	A	0/1	A	0/1	'-'
chr1	1806906	A	G	0/1	G	0/1	G	0/1	'-'	'-'	'-'	'-'	'-'	'-'	'-'
chr1	18073654	T	A	0/1	A	0/1	A	0/1	'-'	'-'	'-'	'-'	'-'	'-'	'-'
chr1	18076938	T	'-'	'-'	'-'	'-'	'-'	'-'	C	0/1	C	0/1	C	0/1	Cs1g14780
chr1	18079479	G	A	0/1	A	0/1	A	0/1	'-'	'-'	'-'	'-'	'-'	'-'	'-'
chr1	18079492	C	A	0/1	A	0/1	A	0/1	'-'	'-'	'-'	'-'	'-'	'-'	'-'
chr1	18081657	A	C	0/1	C	0/1	C	0/1	'-'	'-'	'-'	'-'	'-'	'-'	'-'
chr1	18106084	C	T	0/1	T	0/1	T	0/1	'-'	'-'	'-'	'-'	'-'	'-'	'-'
chr1	18107747	C	'-'	'-'	'-'	'-'	'-'	'-'	T	0/1	T	0/1	T	0/1	Cs1g14790
chr1	18107913	G	'-'	'-'	'-'	'-'	'-'	'-'	A	0/1	A	0/1	A	0/1	Cs1g14790
chr1	18111681	T	'-'	'-'	'-'	'-'	'-'	'-'	C	0/1	C	0/1	C	0/1	'-'
chr1	18119276	C	'-'	'-'	'-'	'-'	'-'	'-'	T	0/1	T	0/1	T	0/1	'-'
chr1	18161980	C	'-'	'-'	'-'	'-'	'-'	'-'	T	0/1	T	0/1	T	0/1	'-'
chr1	18175373	C	T	0/1	T	0/1	T	0/1	'-'	'-'	'-'	'-'	'-'	'-'	'-'
chr1	18177499	G	'-'	'-'	'-'	'-'	'-'	'-'	T	0/1	T	0/1	T	0/1	'-'
chr1	1819481	A	G	0/1	G	0/1	G	0/1	'-'	'-'	'-'	'-'	'-'	'-'	'-'
chr1	1819791	C	A	0/1	A	0/1	A	0/1	'-'	'-'	'-'	'-'	'-'	'-'	'-'
chr1	18290614	C	'-'	'-'	'-'	'-'	'-'	'-'	T	0/1	T	0/1	T	0/1	'-'
chr1	18314841	G	A	0/1	A	0/1	A	0/1	'-'	'-'	'-'	'-'	'-'	'-'	'-'
chr1	18315669	T	A	0/1	A	0/1	A	0/1	'-'	'-'	'-'	'-'	'-'	'-'	'-'
chr1	18315672	T	A	0/1	A	0/1	A	0/1	'-'	'-'	'-'	'-'	'-'	'-'	'-'
chr1	18316799	A	C	0/1	C	0/1	C	0/1	'-'	'-'	'-'	'-'	'-'	'-'	'-'
chr1	18329328	T	'-'	'-'	'-'	'-'	'-'	'-'	A	0/1	A	0/1	A	0/1	'-'
chr1	18332250	C	G	0/1	G	0/1	G	0/1	'-'	'-'	'-'	'-'	'-'	'-'	Cs1g15060
chr1	18342766	C	G	0/1	G	0/1	G	0/1	'-'	'-'	'-'	'-'	'-'	'-'	'-'
chr1	18345274	G	'-'	'-'	'-'	'-'	'-'	'-'	A	0/1	A	0/1	A	0/1	'-'
chr1	18345276	G	'-'	'-'	'-'	'-'	'-'	'-'	A	0/1	A	0/1	A	0/1	'-'
chr1	18409452	C	'-'	'-'	'-'	'-'	'-'	'-'	G	0/1	G	0/1	G	0/1	Cs1g15180
chr1	18412475	G	'-'	'-'	'-'	'-'	'-'	'-'	T	0/1	T	0/1	T	0/1	'-'
chr1	18412539	T	'-'	'-'	'-'	'-'	'-'	'-'	G	0/1	G	0/1	G	0/1	'-'
chr1	18412551	C	'-'	'-'	'-'	'-'	'-'	'-'	G	0/1	G	0/1	G	0/1	'-'
chr1	18412555	T	'-'	'-'	'-'	'-'	'-'	'-'	G	0/1	G	0/1	G	0/1	'-'
chr1	18412568	G	'-'	'-'	'-'	'-'	'-'	'-'	T	0/1	T	0/1	T	0/1	'-'
chr1	18439809	T	C	0/1	C	0/1	C	0/1	'-'	'-'	'-'	'-'	'-'	'-'	'-'
chr1	18439811	C	A	0/1	A	0/1	A	0/1	'-'	'-'	'-'	'-'	'-'	'-'	'-'
chr1	18439819	G	C	0/1	C	0/1	C	0/1	'-'	'-'	'-'	'-'	'-'	'-'	'-'
chr1	18473848	A	'-'	'-'	'-'	'-'	'-'	'-'	C	0/1	C	0/1	C	0/1	'-'
chr1	18473850	A	'-'	'-'	'-'	'-'	'-'	'-'	G	0/1	G	0/1	G	0/1	'-'
chr1	18483882	A	'-'	'-'	'-'	'-'	'-'	'-'	G	0/1	G	0/1	G	0/1	'-'
chr1	18483886	T	'-'	'-'	'-'	'-'	'-'	'-'	C	0/1	C	0/1	C	0/1	'-'
chr1	18483919	G	'-'	'-'	'-'	'-'	'-'	'-'	A	0/1	A	0/1	A	0/1	'-'
chr1	1850414	T	A	0/1	A	0/1	A	0/1	'-'	'-'	'-'	'-'	'-'	'-'	'-'
chr1	18517496	A	'-'	'-'	'-'	'-'	'-'	'-'	T	0/1	T	0/1	T	0/1	'-'
chr1	18520990	C	'-'	'-'	'-'	'-'	'-'	'-'	G	0/1	G	0/1	G	0/1	'-'
chr1	18520998	A	'-'	'-'	'-'	'-'	'-'	'-'	C	0/1	C	0/1	C	0/1	'-'
chr1	18548989	C	A	0/1	A	0/1	A	0/1	'-'	'-'	'-'	'-'	'-'	'-'	'-'
chr1	18559698	A	'-'	'-'	'-'	'-'	'-'	'-'	G	0/1	G	0/1	G	0/1	'-'
chr1	18559699	T	'-'	'-'	'-'	'-'	'-'	'-'	A	0/1	A	0/1	A	0/1	'-'
chr1	18559705	G	'-'	'-'	'-'	'-'	'-'	'-'	A	0/1	A	0/1	A	0/1	'-'
chr1	18559713	T	'-'	'-'	'-'	'-'	'-'	'-'	A	0/1	A	0/1	A	0/1	'-'
chr1	18577599	C	A	0/1	A	0/1	A	0/1	'-'	'-'	'-'	'-'	'-'	'-'	'-'
chr1	18577636	C	G	0/1	G	0/1	G	0/1	'-'	'-'	'-'	'-'	'-'	'-'	'-'
chr1	18589464	A	G	0/1	G	0/1	G	0/1	'-'	'-'	'-'	'-'	'-'	'-'	'-'
chr1	1862274	C	T	0/1	T	0/1	T	0/1	'-'	'-'	'-'	'-'	'-'	'-'	'-'
chr1	1864998	T	'-'	'-'	'-'	'-'	'-'	'-'	C	0/1	C	0/1	C	0/1	'-'
chr1	18654735	A	T	0/1	T	0/1	T	0/1	'-'	'-'	'-'	'-'	'-'	'-'	'-'
chr1	18668393	T	'-'	'-'	'-'	'-'	'-'	'-'	C	0/1	C	0/1	C	0/1	'-'
chr1	18668415	C	'-'	'-'	'-'	'-'	'-'	'-'	T	0/1	T	0/1	T	0/1	'-'
chr1	18670853	C	T	0/1	T	0/1	T	0/1	'-'	'-'	'-'	'-'	'-'	'-'	'-'
chr1	18672706	G	'-'	'-'	'-'	'-'	'-'	'-'	A	0/1	A	0/1	A	0/1	'-'
chr1	18672722	A	'-'	'-'	'-'	'-'	'-'	'-'	G	0/1	G	0/1	G	0/1	'-'
chr1	18672728	A	'-'	'-'	'-'	'-'	'-'	'-'	C	0/1	C	0/1	C	0/1	'-'
chr1	18676379	A	C	0/1	C	0/1	C	0/1	'-'	'-'	'-'	'-'	'-'	'-'	'-'
chr1	18721793	G	'-'	'-'	'-'	'-'	'-'	'-'	A	0/1	A	0/1	A	0/1	'-'
chr1	18740607	G	A	0/1	A	0/1	A	0/1	'-'	'-'	'-'	'-'	'-'	'-'	'-'
chr1	18773740	A	C	0/1	C	0/1	C	0/1	'-'	'-'	'-'	'-'	'-'	'-'	'-'
chr1	18807496	C	'-'	'-'	'-'	'-'	'-'	'-'	T	0/1	T	0/1	T	0/1	'-'
chr1	18809582	A	G	0/1	G	0/1	G	0/1	'-'	'-'	'-'	'-'	'-'	'-'	'-'
chr1	18809600	T	C	0/1	C	0/1	C	0/1	'-'	'-'	'-'	'-'	'-'	'-'	'-'
chr1	18809615	A	G	0/1	G	0/1	G	0/1	'-'	'-'	'-'	'-'	'-'	'-'	'-'
chr1	18829252	T	'-'	'-'	'-'	'-'	'-'	'-'	C	0/1	C	0/1	C	0/1	'-'
chr1	18829253	A	'-'	'-'	'-'	'-'	'-'	'-'	G	0/1	G	0/1	G	0/1	'-'
chr1	18839424	C	G	0/1	G	0/1	G	0/1	'-'	'-'	'-'	'-'	'-'	'-'	'-'
chr1	18842945	A	'-'	'-'	'-'	'-'	'-'	'-'	T	0/1	T	0/1	T	0/1	'-'
chr1	18849	T	'-'	'-'	'-'	'-'	'-'	'-'	G	0/1	G	0/1	G	0/1	'-'
chr1	18854461	A	'-'	'-'	'-'	'-'	'-'	'-'	T	0/1	T	0/1	T	0/1	'-'
chr1	18854462	A	'-'	'-'	'-'	'-'	'-'	'-'	T	0/1	T	0/1	T	0/1	'-'
chr1	18854463	A	'-'	'-'	'-'	'-'	'-'	'-'	T	0/1	T	0/1	T	0/1	'-'
chr1	18862885	C	'-'	'-'	'-'	'-'	'-'	'-'	T	0/1	T	0/1	T	0/1	'-'
chr1	18927725	C	'-'	'-'	'-'	'-'	'-'	'-'	G	0/1	G	0/1	G	0/1	'-'
chr1	18958922	T	'-'	'-'	'-'	'-'	'-'	'-'	C	0/1	C	0/1	C	0/1	'-'
chr1	18969547	A	G	0/1	G	0/1	G	0/1	'-'	'-'	'-'	'-'	'-'	'-'	'-'
chr1	18969553	G	A	0/1	A	0/1	A	0/1	'-'	'-'	'-'	'-'	'-'	'-'	'-'
chr1	18969561	G	A	0/1	A	0/1	A	0/1	'-'	'-'	'-'	'-'	'-'	'-'	'-'
chr1	18973732	T	'-'	'-'	'-'	'-'	'-'	'-'	A	0/1	A	0/1	A	0/1	'-'
chr1	18973734	T	'-'	'-'	'-'	'-'	'-'	'-'	C	0/1	C	0/1	C	0/1	'-'
chr1	19011242	G	A	0/1	A	0/1	A	0/1	C	0/1	C	0/1	C	0/1	'-'
chr1	19039435	A	G	0/1	G	0/1	G	0/1	'-'	'-'	'-'	'-'	'-'	'-'	'-'
chr1	19039479	C	G	0/1	G	0/1	G	0/1	'-'	'-'	'-'	'-'	'-'	'-'	'-'
chr1	19039484	T	C	0/1	C	0/1	C	0/1	'-'	'-'	'-'	'-'	'-'	'-'	'-'
chr1	19039493	A	G	0/1	G	0/1	G	0/1	'-'	'-'	'-'	'-'	'-'	'-'	'-'
chr1	19039497	A	G	0/1	G	0/1	G	0/1	'-'	'-'	'-'	'-'	'-'	'-'	'-'
chr1	19039508	G	A	0/1	A	0/1	A	0/1	'-'	'-'	'-'	'-'	'-'	'-'	'-'
chr1	19039509	C	T	0/1	T	0/1	T	0/1	'-'	'-'	'-'	'-'	'-'	'-'	'-'
chr1	19039520	A	G	0/1	G	0/1	G	0/1	'-'	'-'	'-'	'-'	'-'	'-'	'-'
chr1	19039521	C	T	0/1	T	0/1	T	0/1	'-'	'-'	'-'	'-'	'-'	'-'	'-'
chr1	19065464	T	'-'	'-'	'-'	'-'	'-'	'-'	C	0/1	C	0/1	C	0/1	'-'
chr1	19065527	A	'-'	'-'	'-'	'-'	'-'	'-'	C	0/1	C	0/1	C	0/1	'-'
chr1	19065548	G	'-'	'-'	'-'	'-'	'-'	'-'	A	0/1	A	0/1	A	0/1	'-'
chr1	19090717	G	A	0/1	A	0/1	A	0/1	'-'	'-'	'-'	'-'	'-'	'-'	'-'
chr1	19090718	T	C	0/1	C	0/1	C	0/1	'-'	'-'	'-'	'-'	'-'	'-'	'-'
chr1	19113393	T	'-'	'-'	'-'	'-'	'-'	'-'	C	0/1	C	0/1	C	0/1	'-'
chr1	19113428	C	'-'	'-'	'-'	'-'	'-'	'-'	T	0/1	T	0/1	T	0/1	'-'
chr1	19113958	T	'-'	'-'	'-'	'-'	'-'	'-'	A	0/1	A	0/1	A	0/1	'-'
chr1	19114121	G	'-'	'-'	'-'	'-'	'-'	'-'	A	0/1	A	0/1	A	0/1	'-'
chr1	19119337	T	'-'	'-'	'-'	'-'	'-'	'-'	A	0/1	A	0/1	A	0/1	'-'
chr1	19123418	T	A	0/1	A	0/1	A	0/1	'-'	'-'	'-'	'-'	'-'	'-'	'-'
chr1	19123420	T	A	0/1	A	0/1	A	0/1	'-'	'-'	'-'	'-'	'-'	'-'	'-'
chr1	19135258	C	'-'	'-'	'-'	'-'	'-'	'-'	T	0/1	T	0/1	T	0/1	'-'
chr1	19142258	C	'-'	'-'	'-'	'-'	'-'	'-'	A	0/1	A	0/1	A	0/1	'-'
chr1	19142273	A	'-'	'-'	'-'	'-'	'-'	'-'	T	0/1	T	0/1	T	0/1	'-'
chr1	19156467	C	'-'	'-'	'-'	'-'	'-'	'-'	T	0/1	T	0/1	T	0/1	'-'
chr1	19161037	A	G	0/1	G	0/1	G	0/1	'-'	'-'	'-'	'-'	'-'	'-'	'-'
chr1	19161093	C	T	0/1	T	0/1	T	0/1	'-'	'-'	'-'	'-'	'-'	'-'	'-'
chr1	19178575	T	A	0/1	A	0/1	A	0/1	'-'	'-'	'-'	'-'	'-'	'-'	'-'
chr1	19179172	T	'-'	'-'	'-'	'-'	'-'	'-'	A	0/1	A	0/1	A	0/1	'-'
chr1	19183814	A	'-'	'-'	'-'	'-'	'-'	'-'	G	0/1	G	0/1	G	0/1	'-'
chr1	19186452	A	G	0/1	G	0/1	G	0/1	'-'	'-'	'-'	'-'	'-'	'-'	'-'
chr1	19187409	T	C	0/1	C	0/1	C	0/1	'-'	'-'	'-'	'-'	'-'	'-'	'-'
chr1	19188944	A	T	0/1	T	0/1	T	0/1	T	0/1	T	0/1	T	0/1	'-'
chr1	19188948	A	G	0/1	G	0/1	G	0/1	G	0/1	G	0/1	G	0/1	'-'
chr1	19188951	A	T	0/1	T	0/1	T	0/1	T	0/1	T	0/1	T	0/1	'-'
chr1	19188959	A	C	0/1	C	0/1	C	0/1	C	0/1	C	0/1	C	0/1	'-'
chr1	19189693	A	'-'	'-'	'-'	'-'	'-'	'-'	G	0/1	G	0/1	G	0/1	'-'
chr1	19190486	T	'-'	'-'	'-'	'-'	'-'	'-'	C	0/1	C	0/1	C	0/1	'-'
chr1	19194416	G	'-'	'-'	'-'	'-'	'-'	'-'	A	0/1	A	0/1	A	0/1	'-'
chr1	19194509	T	C	0/1	C	0/1	C	0/1	'-'	'-'	'-'	'-'	'-'	'-'	'-'
chr1	19194542	T	'-'	'-'	'-'	'-'	'-'	'-'	C	0/1	C	0/1	C	0/1	'-'
chr1	19195633	T	'-'	'-'	'-'	'-'	'-'	'-'	C	0/1	C	0/1	C	0/1	'-'
chr1	19215014	G	'-'	'-'	'-'	'-'	'-'	'-'	A	0/1	A	0/1	A	0/1	'-'
chr1	19229239	C	T	0/1	T	0/1	T	0/1	'-'	'-'	'-'	'-'	'-'	'-'	'-'
chr1	19236424	A	'-'	'-'	'-'	'-'	'-'	'-'	G	0/1	G	0/1	G	0/1	Cs1g16130
chr1	19245910	T	G	0/1	G	0/1	G	0/1	'-'	'-'	'-'	'-'	'-'	'-'	'-'
chr1	19247767	A	G	0/1	G	0/1	G	0/1	'-'	'-'	'-'	'-'	'-'	'-'	'-'
chr1	19247777	G	A	0/1	A	0/1	A	0/1	'-'	'-'	'-'	'-'	'-'	'-'	'-'
chr1	19247794	A	G	0/1	G	0/1	G	0/1	'-'	'-'	'-'	'-'	'-'	'-'	'-'
chr1	19247807	C	T	0/1	T	0/1	T	0/1	'-'	'-'	'-'	'-'	'-'	'-'	'-'
chr1	19247818	A	G	0/1	G	0/1	G	0/1	'-'	'-'	'-'	'-'	'-'	'-'	'-'
chr1	19273096	G	'-'	'-'	'-'	'-'	'-'	'-'	T	0/1	T	0/1	T	0/1	'-'
chr1	19276583	A	G	0/1	G	0/1	G	0/1	'-'	'-'	'-'	'-'	'-'	'-'	'-'
chr1	19276590	C	A	0/1	A	0/1	A	0/1	'-'	'-'	'-'	'-'	'-'	'-'	'-'
chr1	19276613	A	G	0/1	G	0/1	G	0/1	'-'	'-'	'-'	'-'	'-'	'-'	'-'
chr1	19278820	C	'-'	'-'	'-'	'-'	'-'	'-'	A	0/1	A	0/1	A	0/1	'-'
chr1	19278828	A	'-'	'-'	'-'	'-'	'-'	'-'	T	0/1	T	0/1	T	0/1	'-'
chr1	19278832	C	'-'	'-'	'-'	'-'	'-'	'-'	A	0/1	A	0/1	A	0/1	'-'
chr1	19278835	A	'-'	'-'	'-'	'-'	'-'	'-'	G	0/1	G	0/1	G	0/1	'-'
chr1	19278842	C	'-'	'-'	'-'	'-'	'-'	'-'	T	0/1	T	0/1	T	0/1	'-'
chr1	19292172	G	A	0/1	A	0/1	A	0/1	'-'	'-'	'-'	'-'	'-'	'-'	'-'
chr1	19302548	A	'-'	'-'	'-'	'-'	'-'	'-'	T	0/1	T	0/1	T	0/1	'-'
chr1	19303803	A	G	0/1	G	0/1	G	0/1	'-'	'-'	'-'	'-'	'-'	'-'	'-'
chr1	19307183	T	'-'	'-'	'-'	'-'	'-'	'-'	A	0/1	A	0/1	A	0/1	'-'
chr1	19307187	G	'-'	'-'	'-'	'-'	'-'	'-'	A	0/1	A	0/1	A	0/1	'-'
chr1	19307189	C	'-'	'-'	'-'	'-'	'-'	'-'	G	0/1	G	0/1	G	0/1	'-'
chr1	19363556	A	'-'	'-'	'-'	'-'	'-'	'-'	T	0/1	T	0/1	T	0/1	'-'
chr1	1936454	C	'-'	'-'	'-'	'-'	'-'	'-'	A	0/1	A	0/1	A	0/1	'-'
chr1	1936455	C	'-'	'-'	'-'	'-'	'-'	'-'	A	0/1	A	0/1	A	0/1	'-'
chr1	19368183	A	'-'	'-'	'-'	'-'	'-'	'-'	G	0/1	G	0/1	G	0/1	'-'
chr1	19368187	T	'-'	'-'	'-'	'-'	'-'	'-'	C	0/1	C	0/1	C	0/1	'-'
chr1	19368202	C	'-'	'-'	'-'	'-'	'-'	'-'	T	0/1	T	0/1	T	0/1	'-'
chr1	19368214	G	'-'	'-'	'-'	'-'	'-'	'-'	A	0/1	A	0/1	A	0/1	'-'
chr1	19368216	A	'-'	'-'	'-'	'-'	'-'	'-'	G	0/1	G	0/1	G	0/1	'-'
chr1	19368225	C	'-'	'-'	'-'	'-'	'-'	'-'	T	0/1	T	0/1	T	0/1	'-'
chr1	19372452	C	T	0/1	T	0/1	T	0/1	'-'	'-'	'-'	'-'	'-'	'-'	'-'
chr1	19378561	A	'-'	'-'	'-'	'-'	'-'	'-'	G	0/1	G	0/1	G	0/1	'-'
chr1	19378564	T	'-'	'-'	'-'	'-'	'-'	'-'	C	0/1	C	0/1	C	0/1	'-'
chr1	19378569	T	'-'	'-'	'-'	'-'	'-'	'-'	A	0/1	A	0/1	A	0/1	'-'
chr1	19378596	A	'-'	'-'	'-'	'-'	'-'	'-'	G	0/1	G	0/1	G	0/1	'-'
chr1	19378608	A	'-'	'-'	'-'	'-'	'-'	'-'	G	0/1	G	0/1	G	0/1	'-'
chr1	19382604	C	T	0/1	T	0/1	T	0/1	'-'	'-'	'-'	'-'	'-'	'-'	'-'
chr1	19382637	G	A	0/1	A	0/1	A	0/1	'-'	'-'	'-'	'-'	'-'	'-'	'-'
chr1	19442338	G	A	0/1	A	0/1	A	0/1	'-'	'-'	'-'	'-'	'-'	'-'	'-'
chr1	19528941	T	G	0/1	G	0/1	G	0/1	'-'	'-'	'-'	'-'	'-'	'-'	'-'
chr1	19528942	C	T	0/1	T	0/1	T	0/1	'-'	'-'	'-'	'-'	'-'	'-'	'-'
chr1	19528948	A	T	0/1	T	0/1	T	0/1	'-'	'-'	'-'	'-'	'-'	'-'	'-'
chr1	19536940	T	C	0/1	C	0/1	C	0/1	'-'	'-'	'-'	'-'	'-'	'-'	'-'
chr1	19553395	A	'-'	'-'	'-'	'-'	'-'	'-'	G	0/1	G	0/1	G	0/1	'-'
chr1	19553420	G	'-'	'-'	'-'	'-'	'-'	'-'	C	0/1	C	0/1	C	0/1	'-'
chr1	19553456	G	'-'	'-'	'-'	'-'	'-'	'-'	T	0/1	T	0/1	T	0/1	'-'
chr1	19556803	C	A	0/1	A	0/1	A	0/1	'-'	'-'	'-'	'-'	'-'	'-'	'-'
chr1	19576334	A	T	0/1	T	0/1	T	0/1	'-'	'-'	'-'	'-'	'-'	'-'	'-'
chr1	19690586	G	'-'	'-'	'-'	'-'	'-'	'-'	A	0/1	A	0/1	A	0/1	'-'
chr1	19690588	C	'-'	'-'	'-'	'-'	'-'	'-'	T	0/1	T	0/1	T	0/1	'-'
chr1	19690599	G	'-'	'-'	'-'	'-'	'-'	'-'	A	0/1	A	0/1	A	0/1	'-'
chr1	19690673	T	'-'	'-'	'-'	'-'	'-'	'-'	C	0/1	C	0/1	C	0/1	'-'
chr1	19690706	T	'-'	'-'	'-'	'-'	'-'	'-'	G	0/1	G	0/1	G	0/1	'-'
chr1	19700867	C	T	0/1	T	0/1	T	0/1	'-'	'-'	'-'	'-'	'-'	'-'	'-'
chr1	19737741	G	T	0/1	T	0/1	T	0/1	'-'	'-'	'-'	'-'	'-'	'-'	'-'
chr1	19813988	C	T	0/1	T	0/1	T	0/1	'-'	'-'	'-'	'-'	'-'	'-'	'-'
chr1	19830090	A	'-'	'-'	'-'	'-'	'-'	'-'	G	0/1	G	0/1	G	0/1	'-'
chr1	19851073	A	T	0/1	T	0/1	T	0/1	'-'	'-'	'-'	'-'	'-'	'-'	'-'
chr1	19851107	G	T	0/1	T	0/1	T	0/1	'-'	'-'	'-'	'-'	'-'	'-'	'-'
chr1	19875269	G	'-'	'-'	'-'	'-'	'-'	'-'	A	0/1	A	0/1	A	0/1	'-'
chr1	19884907	C	T	0/1	T	0/1	T	0/1	'-'	'-'	'-'	'-'	'-'	'-'	'-'
chr1	19895455	T	'-'	'-'	'-'	'-'	'-'	'-'	G	0/1	G	0/1	G	0/1	'-'
chr1	19930169	C	A	0/1	A	0/1	A	0/1	'-'	'-'	'-'	'-'	'-'	'-'	'-'
chr1	19939245	G	A	0/1	A	0/1	A	0/1	'-'	'-'	'-'	'-'	'-'	'-'	'-'
chr1	19939246	T	A	0/1	A	0/1	A	0/1	'-'	'-'	'-'	'-'	'-'	'-'	'-'
chr1	19940894	G	A	0/1	A	0/1	A	0/1	'-'	'-'	'-'	'-'	'-'	'-'	'-'
chr1	19950159	A	'-'	'-'	'-'	'-'	'-'	'-'	C	0/1	C	0/1	C	0/1	'-'
chr1	19962672	T	C	0/1	C	0/1	C	0/1	'-'	'-'	'-'	'-'	'-'	'-'	'-'
chr1	19963684	G	T	0/1	T	0/1	T	0/1	'-'	'-'	'-'	'-'	'-'	'-'	'-'
chr1	19969890	G	'-'	'-'	'-'	'-'	'-'	'-'	A	0/1	A	0/1	A	0/1	'-'
chr1	19986611	T	'-'	'-'	'-'	'-'	'-'	'-'	A	0/1	A	0/1	A	0/1	'-'
chr1	19989051	G	'-'	'-'	'-'	'-'	'-'	'-'	T	0/1	T	0/1	T	0/1	'-'
chr1	19993751	C	'-'	'-'	'-'	'-'	'-'	'-'	A	0/1	A	0/1	A	0/1	'-'
chr1	20003993	T	A	0/1	A	0/1	A	0/1	'-'	'-'	'-'	'-'	'-'	'-'	'-'
chr1	20003999	G	A	0/1	A	0/1	A	0/1	'-'	'-'	'-'	'-'	'-'	'-'	'-'
chr1	20046763	C	'-'	'-'	'-'	'-'	'-'	'-'	T	0/1	T	0/1	T	0/1	'-'
chr1	20059254	A	G	0/1	G	0/1	G	0/1	'-'	'-'	'-'	'-'	'-'	'-'	'-'
chr1	20078227	G	C	0/1	C	0/1	C	0/1	'-'	'-'	'-'	'-'	'-'	'-'	'-'
chr1	20092014	C	'-'	'-'	'-'	'-'	'-'	'-'	T	0/1	T	0/1	T	0/1	'-'
chr1	20126769	T	'-'	'-'	'-'	'-'	'-'	'-'	C	0/1	C	0/1	C	0/1	'-'
chr1	20127651	A	C	0/1	C	0/1	C	0/1	'-'	'-'	'-'	'-'	'-'	'-'	'-'
chr1	20150923	C	'-'	'-'	'-'	'-'	'-'	'-'	T	0/1	T	0/1	T	0/1	'-'
chr1	20174098	G	'-'	'-'	'-'	'-'	'-'	'-'	A	0/1	A	0/1	A	0/1	'-'
chr1	20178164	A	'-'	'-'	'-'	'-'	'-'	'-'	C	0/1	C	0/1	C	0/1	'-'
chr1	20178166	T	C	0/1	C	0/1	C	0/1	'-'	'-'	'-'	'-'	'-'	'-'	'-'
chr1	20179081	A	G	0/1	G	0/1	G	0/1	'-'	'-'	'-'	'-'	'-'	'-'	'-'
chr1	20188128	A	'-'	'-'	'-'	'-'	'-'	'-'	C	0/1	C	0/1	C	0/1	'-'
chr1	20204458	T	'-'	'-'	'-'	'-'	'-'	'-'	A	0/1	A	0/1	A	0/1	'-'
chr1	20209118	A	'-'	'-'	'-'	'-'	'-'	'-'	T	0/1	T	0/1	T	0/1	'-'
chr1	20220467	T	'-'	'-'	'-'	'-'	'-'	'-'	A	0/1	A	0/1	A	0/1	'-'
chr1	20220468	T	'-'	'-'	'-'	'-'	'-'	'-'	G	0/1	G	0/1	G	0/1	'-'
chr1	20226515	C	T	0/1	T	0/1	T	0/1	'-'	'-'	'-'	'-'	'-'	'-'	'-'
chr1	20226518	T	C	0/1	C	0/1	C	0/1	'-'	'-'	'-'	'-'	'-'	'-'	'-'
chr1	20251851	A	'-'	'-'	'-'	'-'	'-'	'-'	T	0/1	T	0/1	T	0/1	'-'
chr1	20272671	T	'-'	'-'	'-'	'-'	'-'	'-'	A	0/1	A	0/1	A	0/1	'-'
chr1	20272679	A	'-'	'-'	'-'	'-'	'-'	'-'	G	0/1	G	0/1	G	0/1	'-'
chr1	20281646	T	'-'	'-'	'-'	'-'	'-'	'-'	C	0/1	C	0/1	C	0/1	'-'
chr1	20306467	T	'-'	'-'	'-'	'-'	'-'	'-'	C	0/1	C	0/1	C	0/1	'-'
chr1	20310797	C	'-'	'-'	'-'	'-'	'-'	'-'	A	0/1	A	0/1	A	0/1	'-'
chr1	20312373	C	T	0/1	T	0/1	T	0/1	'-'	'-'	'-'	'-'	'-'	'-'	'-'
chr1	20312379	T	G	0/1	G	0/1	G	0/1	'-'	'-'	'-'	'-'	'-'	'-'	'-'
chr1	20317242	C	'-'	'-'	'-'	'-'	'-'	'-'	T	0/1	T	0/1	T	0/1	'-'
chr1	20325363	C	G	0/1	G	0/1	G	0/1	'-'	'-'	'-'	'-'	'-'	'-'	'-'
chr1	20330930	C	'-'	'-'	'-'	'-'	'-'	'-'	T	0/1	T	0/1	T	0/1	'-'
chr1	20332993	T	'-'	'-'	'-'	'-'	'-'	'-'	C	0/1	C	0/1	C	0/1	'-'
chr1	20348632	G	A	0/1	A	0/1	A	0/1	'-'	'-'	'-'	'-'	'-'	'-'	'-'
chr1	20348995	G	A	0/1	A	0/1	A	0/1	'-'	'-'	'-'	'-'	'-'	'-'	'-'
chr1	20410319	T	'-'	'-'	'-'	'-'	'-'	'-'	C	0/1	C	0/1	C	0/1	Cs1g17140
chr1	20465306	A	G	0/1	G	0/1	G	0/1	'-'	'-'	'-'	'-'	'-'	'-'	'-'
chr1	20467314	T	A	0/1	A	0/1	A	0/1	'-'	'-'	'-'	'-'	'-'	'-'	'-'
chr1	20527899	T	'-'	'-'	'-'	'-'	'-'	'-'	A	0/1	A	0/1	A	0/1	'-'
chr1	20529436	G	A	0/1	A	0/1	A	0/1	'-'	'-'	'-'	'-'	'-'	'-'	'-'
chr1	20539438	A	T	0/1	T	0/1	T	0/1	'-'	'-'	'-'	'-'	'-'	'-'	'-'
chr1	20549371	A	C	0/1	C	0/1	C	0/1	'-'	'-'	'-'	'-'	'-'	'-'	'-'
chr1	20565628	T	'-'	'-'	'-'	'-'	'-'	'-'	G	0/1	G	0/1	G	0/1	'-'
chr1	20571865	G	A	0/1	A	0/1	A	0/1	'-'	'-'	'-'	'-'	'-'	'-'	'-'
chr1	20571891	G	A	0/1	A	0/1	A	0/1	'-'	'-'	'-'	'-'	'-'	'-'	'-'
chr1	20574785	T	'-'	'-'	'-'	'-'	'-'	'-'	A	0/1	A	0/1	A	0/1	'-'
chr1	20575566	T	'-'	'-'	'-'	'-'	'-'	'-'	C	0/1	C	0/1	C	0/1	'-'
chr1	20611059	C	A	0/1	A	0/1	A	0/1	'-'	'-'	'-'	'-'	'-'	'-'	'-'
chr1	20616001	T	'-'	'-'	'-'	'-'	'-'	'-'	C	0/1	C	0/1	C	0/1	'-'
chr1	20649712	T	C	0/1	C	0/1	C	0/1	'-'	'-'	'-'	'-'	'-'	'-'	'-'
chr1	20665549	A	C	0/1	C	0/1	C	0/1	'-'	'-'	'-'	'-'	'-'	'-'	'-'
chr1	20665550	T	C	0/1	C	0/1	C	0/1	'-'	'-'	'-'	'-'	'-'	'-'	'-'
chr1	20665558	T	C	0/1	C	0/1	C	0/1	'-'	'-'	'-'	'-'	'-'	'-'	'-'
chr1	20671558	C	'-'	'-'	'-'	'-'	'-'	'-'	A	0/1	A	0/1	A	0/1	'-'
chr1	20683812	A	T	0/1	T	0/1	T	0/1	'-'	'-'	'-'	'-'	'-'	'-'	Cs1g17520
chr1	20683828	A	G	0/1	G	0/1	G	0/1	'-'	'-'	'-'	'-'	'-'	'-'	Cs1g17520
chr1	20686920	C	'-'	'-'	'-'	'-'	'-'	'-'	T	0/1	T	0/1	T	0/1	'-'
chr1	20687008	G	'-'	'-'	'-'	'-'	'-'	'-'	A	0/1	A	0/1	A	0/1	'-'
chr1	20687130	G	'-'	'-'	'-'	'-'	'-'	'-'	A	0/1	A	0/1	A	0/1	'-'
chr1	20725650	C	A	0/1	A	0/1	A	0/1	'-'	'-'	'-'	'-'	'-'	'-'	'-'
chr1	20752638	T	C	0/1	C	0/1	C	0/1	'-'	'-'	'-'	'-'	'-'	'-'	'-'
chr1	20753857	G	'-'	'-'	'-'	'-'	'-'	'-'	T	0/1	T	0/1	T	0/1	'-'
chr1	20753861	A	'-'	'-'	'-'	'-'	'-'	'-'	T	0/1	T	0/1	T	0/1	'-'
chr1	20753896	C	'-'	'-'	'-'	'-'	'-'	'-'	T	0/1	T	0/1	T	0/1	'-'
chr1	20755349	C	'-'	'-'	'-'	'-'	'-'	'-'	G	0/1	G	0/1	G	0/1	'-'
chr1	20784974	A	G	0/1	G	0/1	G	0/1	'-'	'-'	'-'	'-'	'-'	'-'	'-'
chr1	20786094	A	'-'	'-'	'-'	'-'	'-'	'-'	T	0/1	T	0/1	T	0/1	Cs1g17630
chr1	20792260	A	G	0/1	G	0/1	G	0/1	'-'	'-'	'-'	'-'	'-'	'-'	'-'
chr1	20797300	T	C	0/1	C	0/1	C	0/1	'-'	'-'	'-'	'-'	'-'	'-'	'-'
chr1	20797369	G	A	0/1	A	0/1	A	0/1	'-'	'-'	'-'	'-'	'-'	'-'	'-'
chr1	20797394	C	T	0/1	T	0/1	T	0/1	'-'	'-'	'-'	'-'	'-'	'-'	'-'
chr1	20797895	C	T	0/1	T	0/1	T	0/1	'-'	'-'	'-'	'-'	'-'	'-'	'-'
chr1	20797899	C	A	0/1	A	0/1	A	0/1	'-'	'-'	'-'	'-'	'-'	'-'	'-'
chr1	20797906	T	C	0/1	C	0/1	C	0/1	'-'	'-'	'-'	'-'	'-'	'-'	'-'
chr1	20798392	A	C	0/1	C	0/1	C	0/1	'-'	'-'	'-'	'-'	'-'	'-'	'-'
chr1	20807714	C	T	0/1	T	0/1	T	0/1	'-'	'-'	'-'	'-'	'-'	'-'	'-'
chr1	20832798	G	A	0/1	A	0/1	A	0/1	'-'	'-'	'-'	'-'	'-'	'-'	'-'
chr1	20841026	C	'-'	'-'	'-'	'-'	'-'	'-'	T	0/1	T	0/1	T	0/1	'-'
chr1	20841077	T	'-'	'-'	'-'	'-'	'-'	'-'	C	0/1	C	0/1	C	0/1	'-'
chr1	20858086	T	G	0/1	G	0/1	G	0/1	'-'	'-'	'-'	'-'	'-'	'-'	'-'
chr1	20858091	T	C	0/1	C	0/1	C	0/1	'-'	'-'	'-'	'-'	'-'	'-'	'-'
chr1	20881070	A	'-'	'-'	'-'	'-'	'-'	'-'	G	0/1	G	0/1	G	0/1	'-'
chr1	20881110	A	'-'	'-'	'-'	'-'	'-'	'-'	G	0/1	G	0/1	G	0/1	'-'
chr1	20883670	G	'-'	'-'	'-'	'-'	'-'	'-'	A	0/1	A	0/1	A	0/1	'-'
chr1	20926335	A	C	0/1	C	0/1	C	0/1	'-'	'-'	'-'	'-'	'-'	'-'	'-'
chr1	20977662	G	A	0/1	A	0/1	A	0/1	'-'	'-'	'-'	'-'	'-'	'-'	'-'
chr1	21020769	G	'-'	'-'	'-'	'-'	'-'	'-'	A	0/1	A	0/1	A	0/1	'-'
chr1	21078930	T	'-'	'-'	'-'	'-'	'-'	'-'	C	0/1	C	0/1	C	0/1	'-'
chr1	21078942	T	'-'	'-'	'-'	'-'	'-'	'-'	A	0/1	A	0/1	A	0/1	'-'
chr1	21096793	T	C	0/1	C	0/1	C	0/1	'-'	'-'	'-'	'-'	'-'	'-'	'-'
chr1	21096841	T	G	0/1	G	0/1	G	0/1	'-'	'-'	'-'	'-'	'-'	'-'	'-'
chr1	21096862	T	G	0/1	G	0/1	G	0/1	'-'	'-'	'-'	'-'	'-'	'-'	'-'
chr1	21142057	G	A	0/1	A	0/1	A	0/1	'-'	'-'	'-'	'-'	'-'	'-'	'-'
chr1	21142059	G	A	0/1	A	0/1	A	0/1	'-'	'-'	'-'	'-'	'-'	'-'	'-'
chr1	21142062	C	T	0/1	T	0/1	T	0/1	'-'	'-'	'-'	'-'	'-'	'-'	'-'
chr1	21142064	C	T	0/1	T	0/1	T	0/1	'-'	'-'	'-'	'-'	'-'	'-'	'-'
chr1	21155001	T	C	0/1	C	0/1	C	0/1	'-'	'-'	'-'	'-'	'-'	'-'	'-'
chr1	21155015	A	G	0/1	G	0/1	G	0/1	'-'	'-'	'-'	'-'	'-'	'-'	'-'
chr1	21155018	A	G	0/1	G	0/1	G	0/1	'-'	'-'	'-'	'-'	'-'	'-'	'-'
chr1	21155037	T	A	0/1	A	0/1	A	0/1	'-'	'-'	'-'	'-'	'-'	'-'	'-'
chr1	21173613	A	'-'	'-'	'-'	'-'	'-'	'-'	T	0/1	T	0/1	T	0/1	'-'
chr1	21223480	C	'-'	'-'	'-'	'-'	'-'	'-'	A	0/1	A	0/1	A	0/1	'-'
chr1	21224655	T	'-'	'-'	'-'	'-'	'-'	'-'	C	0/1	C	0/1	C	0/1	'-'
chr1	21239455	A	T	0/1	T	0/1	T	0/1	'-'	'-'	'-'	'-'	'-'	'-'	'-'
chr1	21240635	A	'-'	'-'	'-'	'-'	'-'	'-'	G	0/1	G	0/1	G	0/1	'-'
chr1	21250399	T	'-'	'-'	'-'	'-'	'-'	'-'	G	0/1	G	0/1	G	0/1	'-'
chr1	21250438	A	'-'	'-'	'-'	'-'	'-'	'-'	C	0/1	C	0/1	C	0/1	'-'
chr1	21291291	A	'-'	'-'	'-'	'-'	'-'	'-'	T	0/1	T	0/1	T	0/1	'-'
chr1	21293330	A	'-'	'-'	'-'	'-'	'-'	'-'	T	0/1	T	0/1	T	0/1	'-'
chr1	21293673	T	C	0/1	C	0/1	C	0/1	'-'	'-'	'-'	'-'	'-'	'-'	'-'
chr1	21295036	T	C	0/1	C	0/1	C	0/1	'-'	'-'	'-'	'-'	'-'	'-'	'-'
chr1	21338035	A	T	0/1	T	0/1	T	0/1	'-'	'-'	'-'	'-'	'-'	'-'	'-'
chr1	21361768	A	G	0/1	G	0/1	G	0/1	'-'	'-'	'-'	'-'	'-'	'-'	Cs1g18380
chr1	21366676	A	T	0/1	T	0/1	T	0/1	'-'	'-'	'-'	'-'	'-'	'-'	'-'
chr1	21366704	T	C	0/1	C	0/1	C	0/1	'-'	'-'	'-'	'-'	'-'	'-'	'-'
chr1	21366737	T	G	0/1	G	0/1	G	0/1	'-'	'-'	'-'	'-'	'-'	'-'	'-'
chr1	21366770	A	T	0/1	T	0/1	T	0/1	'-'	'-'	'-'	'-'	'-'	'-'	'-'
chr1	21373118	T	'-'	'-'	'-'	'-'	'-'	'-'	C	0/1	C	0/1	C	0/1	'-'
chr1	21373133	C	'-'	'-'	'-'	'-'	'-'	'-'	G	0/1	G	0/1	G	0/1	'-'
chr1	21397971	C	T	0/1	T	0/1	T	0/1	'-'	'-'	'-'	'-'	'-'	'-'	'-'
chr1	21445158	C	'-'	'-'	'-'	'-'	'-'	'-'	T	0/1	T	0/1	T	0/1	'-'
chr1	21483293	A	'-'	'-'	'-'	'-'	'-'	'-'	T	0/1	T	0/1	T	0/1	'-'
chr1	21530701	A	G	0/1	G	0/1	G	0/1	'-'	'-'	'-'	'-'	'-'	'-'	'-'
chr1	21538559	G	C	0/1	C	0/1	C	0/1	'-'	'-'	'-'	'-'	'-'	'-'	'-'
chr1	21548834	C	'-'	'-'	'-'	'-'	'-'	'-'	T	0/1	T	0/1	T	0/1	'-'
chr1	21563453	C	T	0/1	T	0/1	T	0/1	'-'	'-'	'-'	'-'	'-'	'-'	'-'
chr1	21563549	C	'-'	'-'	'-'	'-'	'-'	'-'	T	0/1	T	0/1	T	0/1	'-'
chr1	21616900	G	C	0/1	C	0/1	C	0/1	'-'	'-'	'-'	'-'	'-'	'-'	'-'
chr1	21636470	T	'-'	'-'	'-'	'-'	'-'	'-'	G	0/1	G	0/1	G	0/1	'-'
chr1	21651529	C	T	0/1	T	0/1	T	0/1	'-'	'-'	'-'	'-'	'-'	'-'	'-'
chr1	21684183	A	'-'	'-'	'-'	'-'	'-'	'-'	C	0/1	C	0/1	C	0/1	'-'
chr1	21702599	A	'-'	'-'	'-'	'-'	'-'	'-'	G	0/1	G	0/1	G	0/1	'-'
chr1	21733741	T	A	0/1	A	0/1	A	0/1	'-'	'-'	'-'	'-'	'-'	'-'	'-'
chr1	21763592	C	T	0/1	T	0/1	T	0/1	'-'	'-'	'-'	'-'	'-'	'-'	'-'
chr1	21785845	T	G	0/1	G	0/1	G	0/1	'-'	'-'	'-'	'-'	'-'	'-'	'-'
chr1	21785849	G	T	0/1	T	0/1	T	0/1	'-'	'-'	'-'	'-'	'-'	'-'	'-'
chr1	21801749	C	T	0/1	T	0/1	T	0/1	'-'	'-'	'-'	'-'	'-'	'-'	'-'
chr1	21801750	A	G	0/1	G	0/1	G	0/1	'-'	'-'	'-'	'-'	'-'	'-'	'-'
chr1	21801757	G	A	0/1	A	0/1	A	0/1	'-'	'-'	'-'	'-'	'-'	'-'	'-'
chr1	21804185	T	'-'	'-'	'-'	'-'	'-'	'-'	C	0/1	C	0/1	C	0/1	'-'
chr1	21805646	T	C	0/1	C	0/1	C	0/1	'-'	'-'	'-'	'-'	'-'	'-'	'-'
chr1	21821974	G	A	0/1	A	0/1	A	0/1	'-'	'-'	'-'	'-'	'-'	'-'	'-'
chr1	21823527	G	'-'	'-'	'-'	'-'	'-'	'-'	A	0/1	A	0/1	A	0/1	'-'
chr1	21823550	C	'-'	'-'	'-'	'-'	'-'	'-'	A	0/1	A	0/1	A	0/1	'-'
chr1	21828472	G	'-'	'-'	'-'	'-'	'-'	'-'	A	0/1	A	0/1	A	0/1	'-'
chr1	21850494	G	'-'	'-'	'-'	'-'	'-'	'-'	A	0/1	A	0/1	A	0/1	'-'
chr1	21850495	T	'-'	'-'	'-'	'-'	'-'	'-'	G	0/1	G	0/1	G	0/1	'-'
chr1	21886756	T	'-'	'-'	'-'	'-'	'-'	'-'	C	0/1	C	0/1	C	0/1	'-'
chr1	21886757	C	'-'	'-'	'-'	'-'	'-'	'-'	T	0/1	T	0/1	T	0/1	'-'
chr1	21886763	C	'-'	'-'	'-'	'-'	'-'	'-'	T	0/1	T	0/1	T	0/1	'-'
chr1	21898862	A	'-'	'-'	'-'	'-'	'-'	'-'	T	0/1	T	0/1	T	0/1	'-'
chr1	21898897	T	'-'	'-'	'-'	'-'	'-'	'-'	A	0/1	A	0/1	A	0/1	'-'
chr1	21916470	G	A	0/1	A	0/1	A	0/1	'-'	'-'	'-'	'-'	'-'	'-'	Cs1g18880
chr1	21931621	G	'-'	'-'	'-'	'-'	'-'	'-'	A	0/1	A	0/1	A	0/1	'-'
chr1	21931637	G	'-'	'-'	'-'	'-'	'-'	'-'	A	0/1	A	0/1	A	0/1	'-'
chr1	21938684	C	A	0/1	A	0/1	A	0/1	'-'	'-'	'-'	'-'	'-'	'-'	'-'
chr1	21938831	C	T	0/1	T	0/1	T	0/1	'-'	'-'	'-'	'-'	'-'	'-'	'-'
chr1	21938836	A	G	0/1	G	0/1	G	0/1	'-'	'-'	'-'	'-'	'-'	'-'	'-'
chr1	21938840	C	T	0/1	T	0/1	T	0/1	'-'	'-'	'-'	'-'	'-'	'-'	'-'
chr1	21944652	A	G	0/1	G	0/1	G	0/1	'-'	'-'	'-'	'-'	'-'	'-'	'-'
chr1	21944664	A	G	0/1	G	0/1	G	0/1	'-'	'-'	'-'	'-'	'-'	'-'	'-'
chr1	21947316	C	T	0/1	T	0/1	T	0/1	'-'	'-'	'-'	'-'	'-'	'-'	'-'
chr1	22032499	C	'-'	'-'	'-'	'-'	'-'	'-'	T	0/1	T	0/1	T	0/1	'-'
chr1	22032543	C	'-'	'-'	'-'	'-'	'-'	'-'	T	0/1	T	0/1	T	0/1	'-'
chr1	22032579	G	'-'	'-'	'-'	'-'	'-'	'-'	A	0/1	A	0/1	A	0/1	'-'
chr1	22034537	T	A	0/1	A	0/1	A	0/1	'-'	'-'	'-'	'-'	'-'	'-'	'-'
chr1	22035315	T	G	0/1	G	0/1	G	0/1	'-'	'-'	'-'	'-'	'-'	'-'	'-'
chr1	22038972	C	'-'	'-'	'-'	'-'	'-'	'-'	T	0/1	T	0/1	T	0/1	'-'
chr1	22046620	A	'-'	'-'	'-'	'-'	'-'	'-'	T	0/1	T	0/1	T	0/1	'-'
chr1	22046821	C	'-'	'-'	'-'	'-'	'-'	'-'	T	0/1	T	0/1	T	0/1	'-'
chr1	22046864	G	'-'	'-'	'-'	'-'	'-'	'-'	A	0/1	A	0/1	A	0/1	'-'
chr1	22085787	G	'-'	'-'	'-'	'-'	'-'	'-'	A	0/1	A	0/1	A	0/1	'-'
chr1	22086014	A	'-'	'-'	'-'	'-'	'-'	'-'	G	0/1	G	0/1	G	0/1	'-'
chr1	22088752	G	A	0/1	A	0/1	A	0/1	'-'	'-'	'-'	'-'	'-'	'-'	'-'
chr1	22088803	C	T	0/1	T	0/1	T	0/1	'-'	'-'	'-'	'-'	'-'	'-'	'-'
chr1	22089199	T	'-'	'-'	'-'	'-'	'-'	'-'	C	0/1	C	0/1	C	0/1	'-'
chr1	2209282	G	T	0/1	T	0/1	T	0/1	'-'	'-'	'-'	'-'	'-'	'-'	'-'
chr1	22133377	A	'-'	'-'	'-'	'-'	'-'	'-'	G	0/1	G	0/1	G	0/1	'-'
chr1	22162508	G	T	0/1	T	0/1	T	0/1	'-'	'-'	'-'	'-'	'-'	'-'	Cs1g19000
chr1	22162509	C	A	0/1	A	0/1	A	0/1	'-'	'-'	'-'	'-'	'-'	'-'	Cs1g19000
chr1	22162514	A	T	0/1	T	0/1	T	0/1	'-'	'-'	'-'	'-'	'-'	'-'	Cs1g19000
chr1	22169060	C	'-'	'-'	'-'	'-'	'-'	'-'	T	0/1	T	0/1	T	0/1	'-'
chr1	22176480	A	C	0/1	C	0/1	C	0/1	'-'	'-'	'-'	'-'	'-'	'-'	'-'
chr1	22201024	G	'-'	'-'	'-'	'-'	'-'	'-'	A	0/1	A	0/1	A	0/1	'-'
chr1	22226986	G	T	0/1	T	0/1	T	0/1	'-'	'-'	'-'	'-'	'-'	'-'	'-'
chr1	22241425	T	'-'	'-'	'-'	'-'	'-'	'-'	C	0/1	C	0/1	C	0/1	'-'
chr1	22278591	C	T	0/1	T	0/1	T	0/1	'-'	'-'	'-'	'-'	'-'	'-'	'-'
chr1	22278613	G	'-'	'-'	'-'	'-'	'-'	'-'	A	0/1	A	0/1	A	0/1	'-'
chr1	22278676	C	T	0/1	T	0/1	T	0/1	'-'	'-'	'-'	'-'	'-'	'-'	'-'
chr1	22283990	T	'-'	'-'	'-'	'-'	'-'	'-'	C	0/1	C	0/1	C	0/1	Cs1g19040
chr1	22285870	A	G	0/1	G	0/1	G	0/1	'-'	'-'	'-'	'-'	'-'	'-'	Cs1g19040
chr1	22286803	T	C	0/1	C	0/1	C	0/1	'-'	'-'	'-'	'-'	'-'	'-'	'-'
chr1	22287127	T	C	0/1	C	0/1	C	0/1	'-'	'-'	'-'	'-'	'-'	'-'	'-'
chr1	22291323	G	A	0/1	A	0/1	A	0/1	'-'	'-'	'-'	'-'	'-'	'-'	'-'
chr1	22336623	G	'-'	'-'	'-'	'-'	'-'	'-'	A	0/1	A	0/1	A	0/1	'-'
chr1	22339343	C	'-'	'-'	'-'	'-'	'-'	'-'	T	0/1	T	0/1	T	0/1	'-'
chr1	22344448	A	G	0/1	G	0/1	G	0/1	'-'	'-'	'-'	'-'	'-'	'-'	'-'
chr1	22375618	T	C	0/1	C	0/1	C	0/1	'-'	'-'	'-'	'-'	'-'	'-'	'-'
chr1	22377792	C	'-'	'-'	'-'	'-'	'-'	'-'	T	0/1	T	0/1	T	0/1	'-'
chr1	22379717	A	G	0/1	G	0/1	G	0/1	'-'	'-'	'-'	'-'	'-'	'-'	'-'
chr1	22382567	C	T	0/1	T	0/1	T	0/1	'-'	'-'	'-'	'-'	'-'	'-'	'-'
chr1	22382571	A	G	0/1	G	0/1	G	0/1	'-'	'-'	'-'	'-'	'-'	'-'	'-'
chr1	22382572	C	A	0/1	A	0/1	A	0/1	'-'	'-'	'-'	'-'	'-'	'-'	'-'
chr1	22382606	T	C	0/1	C	0/1	C	0/1	'-'	'-'	'-'	'-'	'-'	'-'	'-'
chr1	22382884	C	G	0/1	G	0/1	G	0/1	'-'	'-'	'-'	'-'	'-'	'-'	'-'
chr1	22382892	T	A	0/1	A	0/1	A	0/1	'-'	'-'	'-'	'-'	'-'	'-'	'-'
chr1	22405692	T	A	0/1	A	0/1	A	0/1	'-'	'-'	'-'	'-'	'-'	'-'	'-'
chr1	22412914	G	A	0/1	A	0/1	A	0/1	'-'	'-'	'-'	'-'	'-'	'-'	'-'
chr1	22414831	G	A	0/1	A	0/1	A	0/1	'-'	'-'	'-'	'-'	'-'	'-'	'-'
chr1	22417269	G	A	0/1	A	0/1	A	0/1	'-'	'-'	'-'	'-'	'-'	'-'	'-'
chr1	22419205	C	'-'	'-'	'-'	'-'	'-'	'-'	T	0/1	T	0/1	T	0/1	'-'
chr1	22430429	C	'-'	'-'	'-'	'-'	'-'	'-'	T	0/1	T	0/1	T	0/1	'-'
chr1	22434705	T	'-'	'-'	'-'	'-'	'-'	'-'	C	0/1	C	0/1	C	0/1	'-'
chr1	22438373	A	'-'	'-'	'-'	'-'	'-'	'-'	C	0/1	C	0/1	C	0/1	'-'
chr1	22438412	C	'-'	'-'	'-'	'-'	'-'	'-'	A	0/1	A	0/1	A	0/1	'-'
chr1	22439678	C	'-'	'-'	'-'	'-'	'-'	'-'	G	0/1	G	0/1	G	0/1	'-'
chr1	22439955	G	A	0/1	A	0/1	A	0/1	'-'	'-'	'-'	'-'	'-'	'-'	'-'
chr1	22445098	T	'-'	'-'	'-'	'-'	'-'	'-'	A	0/1	A	0/1	A	0/1	'-'
chr1	22452321	G	T	0/1	T	0/1	T	0/1	'-'	'-'	'-'	'-'	'-'	'-'	'-'
chr1	22452773	A	'-'	'-'	'-'	'-'	'-'	'-'	G	0/1	G	0/1	G	0/1	'-'
chr1	22466260	T	'-'	'-'	'-'	'-'	'-'	'-'	G	0/1	G	0/1	G	0/1	'-'
chr1	22470087	G	'-'	'-'	'-'	'-'	'-'	'-'	A	0/1	A	0/1	A	0/1	'-'
chr1	22489011	A	'-'	'-'	'-'	'-'	'-'	'-'	T	0/1	T	0/1	T	0/1	'-'
chr1	224941	G	A	0/1	A	0/1	A	0/1	'-'	'-'	'-'	'-'	'-'	'-'	Cs1g01140
chr1	224946	C	T	0/1	T	0/1	T	0/1	'-'	'-'	'-'	'-'	'-'	'-'	Cs1g01140
chr1	224952	C	G	0/1	G	0/1	G	0/1	'-'	'-'	'-'	'-'	'-'	'-'	Cs1g01140
chr1	22511811	C	'-'	'-'	'-'	'-'	'-'	'-'	A	0/1	A	0/1	A	0/1	'-'
chr1	22511835	A	'-'	'-'	'-'	'-'	'-'	'-'	G	0/1	G	0/1	G	0/1	'-'
chr1	22526198	G	A	0/1	A	0/1	A	0/1	'-'	'-'	'-'	'-'	'-'	'-'	'-'
chr1	22526219	A	T	0/1	T	0/1	T	0/1	'-'	'-'	'-'	'-'	'-'	'-'	'-'
chr1	22526929	T	'-'	'-'	'-'	'-'	'-'	'-'	A	0/1	A	0/1	A	0/1	'-'
chr1	22539782	T	C	0/1	C	0/1	C	0/1	'-'	'-'	'-'	'-'	'-'	'-'	'-'
chr1	22539786	A	G	0/1	G	0/1	G	0/1	'-'	'-'	'-'	'-'	'-'	'-'	'-'
chr1	22539787	G	A	0/1	A	0/1	A	0/1	'-'	'-'	'-'	'-'	'-'	'-'	'-'
chr1	22557492	G	T	0/1	T	0/1	T	0/1	'-'	'-'	'-'	'-'	'-'	'-'	'-'
chr1	22608286	C	T	0/1	T	0/1	T	0/1	'-'	'-'	'-'	'-'	'-'	'-'	'-'
chr1	22608295	C	T	0/1	T	0/1	T	0/1	'-'	'-'	'-'	'-'	'-'	'-'	'-'
chr1	22635652	A	'-'	'-'	'-'	'-'	'-'	'-'	T	0/1	T	0/1	T	0/1	'-'
chr1	22636035	A	T	0/1	T	0/1	T	0/1	'-'	'-'	'-'	'-'	'-'	'-'	'-'
chr1	22636036	A	T	0/1	T	0/1	T	0/1	'-'	'-'	'-'	'-'	'-'	'-'	'-'
chr1	22678634	T	C	0/1	C	0/1	C	0/1	'-'	'-'	'-'	'-'	'-'	'-'	'-'
chr1	22678658	A	T	0/1	T	0/1	T	0/1	'-'	'-'	'-'	'-'	'-'	'-'	'-'
chr1	22700394	A	G	0/1	G	0/1	G	0/1	'-'	'-'	'-'	'-'	'-'	'-'	'-'
chr1	22708465	C	A	0/1	A	0/1	A	0/1	'-'	'-'	'-'	'-'	'-'	'-'	'-'
chr1	22736465	T	'-'	'-'	'-'	'-'	'-'	'-'	A	0/1	A	0/1	A	0/1	'-'
chr1	22736466	G	'-'	'-'	'-'	'-'	'-'	'-'	A	0/1	A	0/1	A	0/1	'-'
chr1	22737519	C	T	0/1	T	0/1	T	0/1	'-'	'-'	'-'	'-'	'-'	'-'	'-'
chr1	22737522	G	A	0/1	A	0/1	A	0/1	'-'	'-'	'-'	'-'	'-'	'-'	'-'
chr1	22737524	C	A	0/1	A	0/1	A	0/1	'-'	'-'	'-'	'-'	'-'	'-'	'-'
chr1	22737527	A	C	0/1	C	0/1	C	0/1	'-'	'-'	'-'	'-'	'-'	'-'	'-'
chr1	22755767	G	A	0/1	A	0/1	A	0/1	'-'	'-'	'-'	'-'	'-'	'-'	'-'
chr1	22755770	A	G	0/1	G	0/1	G	0/1	'-'	'-'	'-'	'-'	'-'	'-'	'-'
chr1	22780786	G	A	0/1	A	0/1	A	0/1	'-'	'-'	'-'	'-'	'-'	'-'	'-'
chr1	2285648	T	'-'	'-'	'-'	'-'	'-'	'-'	C	0/1	C	0/1	C	0/1	'-'
chr1	22879717	C	'-'	'-'	'-'	'-'	'-'	'-'	T	0/1	T	0/1	T	0/1	'-'
chr1	22879718	T	'-'	'-'	'-'	'-'	'-'	'-'	C	0/1	C	0/1	C	0/1	'-'
chr1	22879721	C	'-'	'-'	'-'	'-'	'-'	'-'	T	0/1	T	0/1	T	0/1	'-'
chr1	22879725	G	'-'	'-'	'-'	'-'	'-'	'-'	A	0/1	A	0/1	A	0/1	'-'
chr1	22885708	A	T	0/1	T	0/1	T	0/1	'-'	'-'	'-'	'-'	'-'	'-'	'-'
chr1	22895884	A	'-'	'-'	'-'	'-'	'-'	'-'	G	0/1	G	0/1	G	0/1	'-'
chr1	22895932	A	'-'	'-'	'-'	'-'	'-'	'-'	T	0/1	T	0/1	T	0/1	'-'
chr1	22916188	C	T	0/1	T	0/1	T	0/1	'-'	'-'	'-'	'-'	'-'	'-'	'-'
chr1	22916201	T	C	0/1	C	0/1	C	0/1	'-'	'-'	'-'	'-'	'-'	'-'	'-'
chr1	22920473	G	T	0/1	T	0/1	T	0/1	'-'	'-'	'-'	'-'	'-'	'-'	'-'
chr1	22920474	A	C	0/1	C	0/1	C	0/1	'-'	'-'	'-'	'-'	'-'	'-'	'-'
chr1	22952480	A	G	0/1	G	0/1	G	0/1	G	0/1	G	0/1	G	0/1	'-'
chr1	22961124	T	'-'	'-'	'-'	'-'	'-'	'-'	G	0/1	G	0/1	G	0/1	'-'
chr1	22961226	C	'-'	'-'	'-'	'-'	'-'	'-'	T	0/1	T	0/1	T	0/1	'-'
chr1	22973541	A	G	0/1	G	0/1	G	0/1	'-'	'-'	'-'	'-'	'-'	'-'	'-'
chr1	22973556	T	C	0/1	C	0/1	C	0/1	'-'	'-'	'-'	'-'	'-'	'-'	'-'
chr1	22974709	G	A	0/1	A	0/1	A	0/1	'-'	'-'	'-'	'-'	'-'	'-'	'-'
chr1	23015247	C	T	0/1	T	0/1	T	0/1	'-'	'-'	'-'	'-'	'-'	'-'	'-'
chr1	23015254	C	T	0/1	T	0/1	T	0/1	'-'	'-'	'-'	'-'	'-'	'-'	'-'
chr1	23019701	G	T	0/1	T	0/1	T	0/1	'-'	'-'	'-'	'-'	'-'	'-'	'-'
chr1	23026556	A	'-'	'-'	'-'	'-'	'-'	'-'	T	0/1	T	0/1	T	0/1	'-'
chr1	23026567	C	'-'	'-'	'-'	'-'	'-'	'-'	G	0/1	G	0/1	G	0/1	'-'
chr1	23026569	T	'-'	'-'	'-'	'-'	'-'	'-'	A	0/1	A	0/1	A	0/1	'-'
chr1	23026570	A	'-'	'-'	'-'	'-'	'-'	'-'	T	0/1	T	0/1	T	0/1	'-'
chr1	23027502	T	A	0/1	A	0/1	A	0/1	'-'	'-'	'-'	'-'	'-'	'-'	'-'
chr1	23028548	C	T	0/1	T	0/1	T	0/1	'-'	'-'	'-'	'-'	'-'	'-'	Cs1g19850
chr1	23049929	T	'-'	'-'	'-'	'-'	'-'	'-'	C	0/1	C	0/1	C	0/1	'-'
chr1	23062439	C	A	0/1	A	0/1	A	0/1	'-'	'-'	'-'	'-'	'-'	'-'	'-'
chr1	23062466	T	C	0/1	C	0/1	C	0/1	'-'	'-'	'-'	'-'	'-'	'-'	'-'
chr1	23101055	A	G	0/1	G	0/1	G	0/1	'-'	'-'	'-'	'-'	'-'	'-'	'-'
chr1	23101072	T	C	0/1	C	0/1	C	0/1	'-'	'-'	'-'	'-'	'-'	'-'	'-'
chr1	23127517	T	'-'	'-'	'-'	'-'	'-'	'-'	C	0/1	C	0/1	C	0/1	'-'
chr1	23132314	A	G	0/1	G	0/1	G	0/1	'-'	'-'	'-'	'-'	'-'	'-'	'-'
chr1	23132320	A	G	0/1	G	0/1	G	0/1	'-'	'-'	'-'	'-'	'-'	'-'	'-'
chr1	23147847	T	C	0/1	C	0/1	C	0/1	'-'	'-'	'-'	'-'	'-'	'-'	'-'
chr1	23147881	T	C	0/1	C	0/1	C	0/1	'-'	'-'	'-'	'-'	'-'	'-'	'-'
chr1	23161589	G	'-'	'-'	'-'	'-'	'-'	'-'	T	0/1	T	0/1	T	0/1	'-'
chr1	23210482	G	'-'	'-'	'-'	'-'	'-'	'-'	A	0/1	A	0/1	A	0/1	'-'
chr1	23223091	A	G	0/1	G	0/1	G	0/1	'-'	'-'	'-'	'-'	'-'	'-'	'-'
chr1	23223096	A	G	0/1	G	0/1	G	0/1	'-'	'-'	'-'	'-'	'-'	'-'	'-'
chr1	23223097	A	G	0/1	G	0/1	G	0/1	'-'	'-'	'-'	'-'	'-'	'-'	'-'
chr1	23223107	G	A	0/1	A	0/1	A	0/1	'-'	'-'	'-'	'-'	'-'	'-'	'-'
chr1	23223110	T	G	0/1	G	0/1	G	0/1	'-'	'-'	'-'	'-'	'-'	'-'	'-'
chr1	23223111	G	A	0/1	A	0/1	A	0/1	'-'	'-'	'-'	'-'	'-'	'-'	'-'
chr1	23261116	C	T	0/1	T	0/1	T	0/1	'-'	'-'	'-'	'-'	'-'	'-'	'-'
chr1	23284738	C	'-'	'-'	'-'	'-'	'-'	'-'	T	0/1	T	0/1	T	0/1	'-'
chr1	23286161	A	'-'	'-'	'-'	'-'	'-'	'-'	G	0/1	G	0/1	G	0/1	'-'
chr1	23301677	C	'-'	'-'	'-'	'-'	'-'	'-'	T	0/1	T	0/1	T	0/1	'-'
chr1	23303590	T	A	0/1	A	0/1	A	0/1	'-'	'-'	'-'	'-'	'-'	'-'	'-'
chr1	23303604	A	G	0/1	G	0/1	G	0/1	'-'	'-'	'-'	'-'	'-'	'-'	'-'
chr1	23303606	T	C	0/1	C	0/1	C	0/1	'-'	'-'	'-'	'-'	'-'	'-'	'-'
chr1	23304941	G	A	0/1	A	0/1	A	0/1	'-'	'-'	'-'	'-'	'-'	'-'	'-'
chr1	23323934	A	'-'	'-'	'-'	'-'	'-'	'-'	T	0/1	T	0/1	T	0/1	'-'
chr1	23330773	T	C	0/1	C	0/1	C	0/1	'-'	'-'	'-'	'-'	'-'	'-'	'-'
chr1	23330803	A	G	0/1	G	0/1	G	0/1	'-'	'-'	'-'	'-'	'-'	'-'	'-'
chr1	23330804	A	G	0/1	G	0/1	G	0/1	'-'	'-'	'-'	'-'	'-'	'-'	'-'
chr1	23354183	A	'-'	'-'	'-'	'-'	'-'	'-'	G	0/1	G	0/1	G	0/1	'-'
chr1	23355576	G	'-'	'-'	'-'	'-'	'-'	'-'	T	0/1	T	0/1	T	0/1	'-'
chr1	23367859	C	T	0/1	T	0/1	T	0/1	'-'	'-'	'-'	'-'	'-'	'-'	'-'
chr1	23372209	T	C	0/1	C	0/1	C	0/1	'-'	'-'	'-'	'-'	'-'	'-'	'-'
chr1	23374964	G	A	0/1	A	0/1	A	0/1	'-'	'-'	'-'	'-'	'-'	'-'	'-'
chr1	23374970	G	A	0/1	A	0/1	A	0/1	'-'	'-'	'-'	'-'	'-'	'-'	'-'
chr1	23374971	G	T	0/1	T	0/1	T	0/1	'-'	'-'	'-'	'-'	'-'	'-'	'-'
chr1	23398775	A	'-'	'-'	'-'	'-'	'-'	'-'	G	0/1	G	0/1	G	0/1	'-'
chr1	23398792	A	'-'	'-'	'-'	'-'	'-'	'-'	G	0/1	G	0/1	G	0/1	'-'
chr1	23410143	C	T	0/1	T	0/1	T	0/1	'-'	'-'	'-'	'-'	'-'	'-'	'-'
chr1	2344279	T	G	0/1	G	0/1	G	0/1	'-'	'-'	'-'	'-'	'-'	'-'	'-'
chr1	23446303	G	'-'	'-'	'-'	'-'	'-'	'-'	T	0/1	T	0/1	T	0/1	'-'
chr1	23450656	C	'-'	'-'	'-'	'-'	'-'	'-'	T	0/1	T	0/1	T	0/1	'-'
chr1	23450686	T	'-'	'-'	'-'	'-'	'-'	'-'	C	0/1	C	0/1	C	0/1	'-'
chr1	23450691	A	'-'	'-'	'-'	'-'	'-'	'-'	G	0/1	G	0/1	G	0/1	'-'
chr1	23450738	C	'-'	'-'	'-'	'-'	'-'	'-'	T	0/1	T	0/1	T	0/1	'-'
chr1	23450752	A	'-'	'-'	'-'	'-'	'-'	'-'	G	0/1	G	0/1	G	0/1	'-'
chr1	23484983	G	'-'	'-'	'-'	'-'	'-'	'-'	T	0/1	T	0/1	T	0/1	'-'
chr1	23497745	A	T	0/1	T	0/1	T	0/1	'-'	'-'	'-'	'-'	'-'	'-'	'-'
chr1	23497755	C	G	0/1	G	0/1	G	0/1	'-'	'-'	'-'	'-'	'-'	'-'	'-'
chr1	23497759	T	A	0/1	A	0/1	A	0/1	'-'	'-'	'-'	'-'	'-'	'-'	'-'
chr1	23503051	A	G	0/1	G	0/1	G	0/1	'-'	'-'	'-'	'-'	'-'	'-'	'-'
chr1	23503054	G	A	0/1	A	0/1	A	0/1	'-'	'-'	'-'	'-'	'-'	'-'	'-'
chr1	2352293	C	'-'	'-'	'-'	'-'	'-'	'-'	T	0/1	T	0/1	T	0/1	'-'
chr1	23539536	A	T	0/1	T	0/1	T	0/1	'-'	'-'	'-'	'-'	'-'	'-'	'-'
chr1	23543003	A	'-'	'-'	'-'	'-'	'-'	'-'	G	0/1	G	0/1	G	0/1	'-'
chr1	23549739	A	G	0/1	G	0/1	G	0/1	'-'	'-'	'-'	'-'	'-'	'-'	'-'
chr1	23570075	C	'-'	'-'	'-'	'-'	'-'	'-'	T	0/1	T	0/1	T	0/1	'-'
chr1	23624250	C	'-'	'-'	'-'	'-'	'-'	'-'	A	0/1	A	0/1	A	0/1	'-'
chr1	23624305	A	'-'	'-'	'-'	'-'	'-'	'-'	G	0/1	G	0/1	G	0/1	'-'
chr1	23624734	A	T	0/1	T	0/1	T	0/1	'-'	'-'	'-'	'-'	'-'	'-'	'-'
chr1	23624735	G	A	0/1	A	0/1	A	0/1	'-'	'-'	'-'	'-'	'-'	'-'	'-'
chr1	23624760	T	C	0/1	C	0/1	C	0/1	'-'	'-'	'-'	'-'	'-'	'-'	'-'
chr1	23627293	C	T	0/1	T	0/1	T	0/1	'-'	'-'	'-'	'-'	'-'	'-'	'-'
chr1	23640677	T	C	0/1	C	0/1	C	0/1	'-'	'-'	'-'	'-'	'-'	'-'	'-'
chr1	23644781	T	'-'	'-'	'-'	'-'	'-'	'-'	C	0/1	C	0/1	C	0/1	'-'
chr1	23644811	C	'-'	'-'	'-'	'-'	'-'	'-'	A	0/1	A	0/1	A	0/1	'-'
chr1	23644836	T	'-'	'-'	'-'	'-'	'-'	'-'	C	0/1	C	0/1	C	0/1	'-'
chr1	23658558	T	'-'	'-'	'-'	'-'	'-'	'-'	C	0/1	C	0/1	C	0/1	'-'
chr1	23668253	G	A	0/1	A	0/1	A	0/1	'-'	'-'	'-'	'-'	'-'	'-'	'-'
chr1	23679568	C	'-'	'-'	'-'	'-'	'-'	'-'	T	0/1	T	0/1	T	0/1	'-'
chr1	23689402	T	'-'	'-'	'-'	'-'	'-'	'-'	G	0/1	G	0/1	G	0/1	'-'
chr1	23689409	G	'-'	'-'	'-'	'-'	'-'	'-'	A	0/1	A	0/1	A	0/1	'-'
chr1	23690634	T	C	0/1	C	0/1	C	0/1	'-'	'-'	'-'	'-'	'-'	'-'	'-'
chr1	23690701	A	G	0/1	G	0/1	G	0/1	'-'	'-'	'-'	'-'	'-'	'-'	'-'
chr1	23690710	A	T	0/1	T	0/1	T	0/1	'-'	'-'	'-'	'-'	'-'	'-'	'-'
chr1	23693269	A	'-'	'-'	'-'	'-'	'-'	'-'	C	0/1	C	0/1	C	0/1	'-'
chr1	23693273	A	'-'	'-'	'-'	'-'	'-'	'-'	G	0/1	G	0/1	G	0/1	'-'
chr1	23693275	G	'-'	'-'	'-'	'-'	'-'	'-'	T	0/1	T	0/1	T	0/1	'-'
chr1	23720922	G	'-'	'-'	'-'	'-'	'-'	'-'	C	0/1	C	0/1	C	0/1	'-'
chr1	23720939	T	'-'	'-'	'-'	'-'	'-'	'-'	A	0/1	A	0/1	A	0/1	'-'
chr1	2373253	T	A	0/1	A	0/1	A	0/1	'-'	'-'	'-'	'-'	'-'	'-'	'-'
chr1	23747518	C	'-'	'-'	'-'	'-'	'-'	'-'	T	0/1	T	0/1	T	0/1	'-'
chr1	23747783	C	'-'	'-'	'-'	'-'	'-'	'-'	A	0/1	A	0/1	A	0/1	'-'
chr1	23792649	A	'-'	'-'	'-'	'-'	'-'	'-'	G	0/1	G	0/1	G	0/1	'-'
chr1	23797371	G	'-'	'-'	'-'	'-'	'-'	'-'	A	0/1	A	0/1	A	0/1	'-'
chr1	23797392	C	'-'	'-'	'-'	'-'	'-'	'-'	A	0/1	A	0/1	A	0/1	'-'
chr1	23809987	G	'-'	'-'	'-'	'-'	'-'	'-'	A	0/1	A	0/1	A	0/1	'-'
chr1	23817027	C	'-'	'-'	'-'	'-'	'-'	'-'	T	0/1	T	0/1	T	0/1	'-'
chr1	23826360	T	A	0/1	A	0/1	A	0/1	'-'	'-'	'-'	'-'	'-'	'-'	'-'
chr1	23833790	T	'-'	'-'	'-'	'-'	'-'	'-'	C	0/1	C	0/1	C	0/1	'-'
chr1	23853429	C	T	0/1	T	0/1	T	0/1	'-'	'-'	'-'	'-'	'-'	'-'	'-'
chr1	23870700	C	T	0/1	T	0/1	T	0/1	'-'	'-'	'-'	'-'	'-'	'-'	'-'
chr1	23870702	C	A	0/1	A	0/1	A	0/1	'-'	'-'	'-'	'-'	'-'	'-'	'-'
chr1	23885550	A	T	0/1	T	0/1	T	0/1	'-'	'-'	'-'	'-'	'-'	'-'	'-'
chr1	23885556	T	A	0/1	A	0/1	A	0/1	'-'	'-'	'-'	'-'	'-'	'-'	'-'
chr1	23885558	C	T	0/1	T	0/1	T	0/1	'-'	'-'	'-'	'-'	'-'	'-'	'-'
chr1	23887222	T	'-'	'-'	'-'	'-'	'-'	'-'	A	0/1	A	0/1	A	0/1	'-'
chr1	23887230	T	'-'	'-'	'-'	'-'	'-'	'-'	C	0/1	C	0/1	C	0/1	'-'
chr1	2390348	A	'-'	'-'	'-'	'-'	'-'	'-'	C	0/1	C	0/1	C	0/1	'-'
chr1	23950316	T	A	0/1	A	0/1	A	0/1	'-'	'-'	'-'	'-'	'-'	'-'	'-'
chr1	23950318	T	A	0/1	A	0/1	A	0/1	'-'	'-'	'-'	'-'	'-'	'-'	'-'
chr1	23950319	C	T	0/1	T	0/1	T	0/1	'-'	'-'	'-'	'-'	'-'	'-'	'-'
chr1	23972107	A	G	0/1	G	0/1	G	0/1	'-'	'-'	'-'	'-'	'-'	'-'	'-'
chr1	23972151	G	A	0/1	A	0/1	A	0/1	'-'	'-'	'-'	'-'	'-'	'-'	'-'
chr1	24029273	G	'-'	'-'	'-'	'-'	'-'	'-'	A	0/1	A	0/1	A	0/1	'-'
chr1	24045669	T	'-'	'-'	'-'	'-'	'-'	'-'	A	0/1	A	0/1	A	0/1	'-'
chr1	24095209	C	A	0/1	A	0/1	A	0/1	'-'	'-'	'-'	'-'	'-'	'-'	'-'
chr1	24096592	T	G	0/1	G	0/1	G	0/1	'-'	'-'	'-'	'-'	'-'	'-'	'-'
chr1	24096596	G	A	0/1	A	0/1	A	0/1	'-'	'-'	'-'	'-'	'-'	'-'	'-'
chr1	24096623	G	A	0/1	A	0/1	A	0/1	'-'	'-'	'-'	'-'	'-'	'-'	'-'
chr1	24096635	G	A	0/1	A	0/1	A	0/1	'-'	'-'	'-'	'-'	'-'	'-'	'-'
chr1	24096646	G	A	0/1	A	0/1	A	0/1	'-'	'-'	'-'	'-'	'-'	'-'	'-'
chr1	24099887	T	A	0/1	A	0/1	A	0/1	'-'	'-'	'-'	'-'	'-'	'-'	'-'
chr1	24099897	A	G	0/1	G	0/1	G	0/1	'-'	'-'	'-'	'-'	'-'	'-'	'-'
chr1	24099902	A	G	0/1	G	0/1	G	0/1	'-'	'-'	'-'	'-'	'-'	'-'	'-'
chr1	24124840	A	'-'	'-'	'-'	'-'	'-'	'-'	T	0/1	T	0/1	T	0/1	'-'
chr1	24125598	G	A	0/1	A	0/1	A	0/1	'-'	'-'	'-'	'-'	'-'	'-'	'-'
chr1	24128558	C	T	0/1	T	0/1	T	0/1	'-'	'-'	'-'	'-'	'-'	'-'	'-'
chr1	24128692	T	'-'	'-'	'-'	'-'	'-'	'-'	A	0/1	A	0/1	A	0/1	'-'
chr1	24143075	G	'-'	'-'	'-'	'-'	'-'	'-'	T	0/1	T	0/1	T	0/1	'-'
chr1	24149073	T	A	0/1	A	0/1	A	0/1	'-'	'-'	'-'	'-'	'-'	'-'	'-'
chr1	241570	A	'-'	'-'	'-'	'-'	'-'	'-'	C	0/1	C	0/1	C	0/1	'-'
chr1	24188636	T	G	0/1	G	0/1	G	0/1	'-'	'-'	'-'	'-'	'-'	'-'	'-'
chr1	24217019	A	'-'	'-'	'-'	'-'	'-'	'-'	T	0/1	T	0/1	T	0/1	'-'
chr1	24217034	T	'-'	'-'	'-'	'-'	'-'	'-'	C	0/1	C	0/1	C	0/1	'-'
chr1	24220531	G	A	0/1	A	0/1	A	0/1	'-'	'-'	'-'	'-'	'-'	'-'	'-'
chr1	24220755	C	'-'	'-'	'-'	'-'	'-'	'-'	T	0/1	T	0/1	T	0/1	'-'
chr1	24223549	G	C	0/1	C	0/1	C	0/1	'-'	'-'	'-'	'-'	'-'	'-'	'-'
chr1	24223566	T	A	0/1	A	0/1	A	0/1	'-'	'-'	'-'	'-'	'-'	'-'	'-'
chr1	24223604	G	A	0/1	A	0/1	A	0/1	'-'	'-'	'-'	'-'	'-'	'-'	'-'
chr1	24255807	A	'-'	'-'	'-'	'-'	'-'	'-'	G	0/1	G	0/1	G	0/1	'-'
chr1	24271688	C	A	0/1	A	0/1	A	0/1	'-'	'-'	'-'	'-'	'-'	'-'	'-'
chr1	24271700	G	A	0/1	A	0/1	A	0/1	'-'	'-'	'-'	'-'	'-'	'-'	'-'
chr1	24278891	G	A	0/1	A	0/1	A	0/1	'-'	'-'	'-'	'-'	'-'	'-'	'-'
chr1	2428657	A	'-'	'-'	'-'	'-'	'-'	'-'	G	0/1	G	0/1	G	0/1	'-'
chr1	24299645	T	'-'	'-'	'-'	'-'	'-'	'-'	A	0/1	A	0/1	A	0/1	'-'
chr1	24311472	A	'-'	'-'	'-'	'-'	'-'	'-'	T	0/1	T	0/1	T	0/1	'-'
chr1	24312149	A	'-'	'-'	'-'	'-'	'-'	'-'	C	0/1	C	0/1	C	0/1	'-'
chr1	24320260	A	T	0/1	T	0/1	T	0/1	'-'	'-'	'-'	'-'	'-'	'-'	'-'
chr1	24342069	A	G	0/1	G	0/1	G	0/1	'-'	'-'	'-'	'-'	'-'	'-'	'-'
chr1	2435629	A	T	0/1	T	0/1	T	0/1	'-'	'-'	'-'	'-'	'-'	'-'	'-'
chr1	24402526	T	C	0/1	C	0/1	C	0/1	'-'	'-'	'-'	'-'	'-'	'-'	'-'
chr1	24402528	T	A	0/1	A	0/1	A	0/1	'-'	'-'	'-'	'-'	'-'	'-'	'-'
chr1	24414677	A	G	0/1	G	0/1	G	0/1	'-'	'-'	'-'	'-'	'-'	'-'	'-'
chr1	24414684	C	G	0/1	G	0/1	G	0/1	'-'	'-'	'-'	'-'	'-'	'-'	'-'
chr1	24414704	T	C	0/1	C	0/1	C	0/1	'-'	'-'	'-'	'-'	'-'	'-'	'-'
chr1	24419954	T	'-'	'-'	'-'	'-'	'-'	'-'	G	0/1	G	0/1	G	0/1	'-'
chr1	24419956	A	'-'	'-'	'-'	'-'	'-'	'-'	C	0/1	C	0/1	C	0/1	'-'
chr1	24433274	G	'-'	'-'	'-'	'-'	'-'	'-'	A	0/1	A	0/1	A	0/1	'-'
chr1	24440297	T	'-'	'-'	'-'	'-'	'-'	'-'	G	0/1	G	0/1	G	0/1	'-'
chr1	24447467	C	'-'	'-'	'-'	'-'	'-'	'-'	G	0/1	G	0/1	G	0/1	'-'
chr1	24447504	G	'-'	'-'	'-'	'-'	'-'	'-'	A	0/1	A	0/1	A	0/1	'-'
chr1	24471826	C	G	0/1	G	0/1	G	0/1	'-'	'-'	'-'	'-'	'-'	'-'	'-'
chr1	24471829	T	A	0/1	A	0/1	A	0/1	'-'	'-'	'-'	'-'	'-'	'-'	'-'
chr1	24471837	C	G	0/1	G	0/1	G	0/1	'-'	'-'	'-'	'-'	'-'	'-'	'-'
chr1	24474710	T	'-'	'-'	'-'	'-'	'-'	'-'	C	0/1	C	0/1	C	0/1	'-'
chr1	24493173	T	A	0/1	A	0/1	A	0/1	'-'	'-'	'-'	'-'	'-'	'-'	'-'
chr1	24493183	G	A	0/1	A	0/1	A	0/1	'-'	'-'	'-'	'-'	'-'	'-'	'-'
chr1	24493354	T	C	0/1	C	0/1	C	0/1	'-'	'-'	'-'	'-'	'-'	'-'	'-'
chr1	24504267	G	'-'	'-'	'-'	'-'	'-'	'-'	C	0/1	C	0/1	C	0/1	'-'
chr1	24504590	C	A	0/1	A	0/1	A	0/1	'-'	'-'	'-'	'-'	'-'	'-'	'-'
chr1	24504593	A	T	0/1	T	0/1	T	0/1	'-'	'-'	'-'	'-'	'-'	'-'	'-'
chr1	24524859	C	T	0/1	T	0/1	T	0/1	'-'	'-'	'-'	'-'	'-'	'-'	'-'
chr1	24524862	C	T	0/1	T	0/1	T	0/1	'-'	'-'	'-'	'-'	'-'	'-'	'-'
chr1	24524871	A	G	0/1	G	0/1	G	0/1	'-'	'-'	'-'	'-'	'-'	'-'	'-'
chr1	24524872	T	C	0/1	C	0/1	C	0/1	'-'	'-'	'-'	'-'	'-'	'-'	'-'
chr1	24524873	G	A	0/1	A	0/1	A	0/1	'-'	'-'	'-'	'-'	'-'	'-'	'-'
chr1	24524900	C	T	0/1	T	0/1	T	0/1	'-'	'-'	'-'	'-'	'-'	'-'	'-'
chr1	24542734	C	'-'	'-'	'-'	'-'	'-'	'-'	A	0/1	A	0/1	A	0/1	'-'
chr1	24553732	G	T	0/1	T	0/1	T	0/1	'-'	'-'	'-'	'-'	'-'	'-'	'-'
chr1	24583124	G	'-'	'-'	'-'	'-'	'-'	'-'	A	0/1	A	0/1	A	0/1	'-'
chr1	24583146	C	'-'	'-'	'-'	'-'	'-'	'-'	T	0/1	T	0/1	T	0/1	'-'
chr1	24583163	T	'-'	'-'	'-'	'-'	'-'	'-'	A	0/1	A	0/1	A	0/1	'-'
chr1	24583198	G	'-'	'-'	'-'	'-'	'-'	'-'	A	0/1	A	0/1	A	0/1	'-'
chr1	24602129	G	'-'	'-'	'-'	'-'	'-'	'-'	T	0/1	T	0/1	T	0/1	'-'
chr1	24614774	C	G	0/1	G	0/1	G	0/1	'-'	'-'	'-'	'-'	'-'	'-'	'-'
chr1	24614814	C	A	0/1	A	0/1	A	0/1	'-'	'-'	'-'	'-'	'-'	'-'	'-'
chr1	24614832	C	G	0/1	G	0/1	G	0/1	'-'	'-'	'-'	'-'	'-'	'-'	'-'
chr1	24617561	T	'-'	'-'	'-'	'-'	'-'	'-'	C	0/1	C	0/1	C	0/1	'-'
chr1	24617564	G	'-'	'-'	'-'	'-'	'-'	'-'	A	0/1	A	0/1	A	0/1	'-'
chr1	24617567	C	'-'	'-'	'-'	'-'	'-'	'-'	T	0/1	T	0/1	T	0/1	'-'
chr1	24617573	T	'-'	'-'	'-'	'-'	'-'	'-'	C	0/1	C	0/1	C	0/1	'-'
chr1	24617579	A	'-'	'-'	'-'	'-'	'-'	'-'	C	0/1	C	0/1	C	0/1	'-'
chr1	24668862	C	T	0/1	T	0/1	T	0/1	'-'	'-'	'-'	'-'	'-'	'-'	'-'
chr1	24685907	C	'-'	'-'	'-'	'-'	'-'	'-'	T	0/1	T	0/1	T	0/1	'-'
chr1	24691456	G	C	0/1	C	0/1	C	0/1	'-'	'-'	'-'	'-'	'-'	'-'	'-'
chr1	24691744	C	T	0/1	T	0/1	T	0/1	'-'	'-'	'-'	'-'	'-'	'-'	'-'
chr1	24726463	T	'-'	'-'	'-'	'-'	'-'	'-'	A	0/1	A	0/1	A	0/1	'-'
chr1	24727336	T	'-'	'-'	'-'	'-'	'-'	'-'	C	0/1	C	0/1	C	0/1	'-'
chr1	24727339	A	'-'	'-'	'-'	'-'	'-'	'-'	G	0/1	G	0/1	G	0/1	'-'
chr1	24727374	A	'-'	'-'	'-'	'-'	'-'	'-'	G	0/1	G	0/1	G	0/1	'-'
chr1	24728778	A	'-'	'-'	'-'	'-'	'-'	'-'	T	0/1	T	0/1	T	0/1	'-'
chr1	24728779	G	'-'	'-'	'-'	'-'	'-'	'-'	T	0/1	T	0/1	T	0/1	'-'
chr1	24740481	A	G	0/1	G	0/1	G	0/1	'-'	'-'	'-'	'-'	'-'	'-'	'-'
chr1	24746778	A	G	0/1	G	0/1	G	0/1	'-'	'-'	'-'	'-'	'-'	'-'	'-'
chr1	24747636	T	C	0/1	C	0/1	C	0/1	'-'	'-'	'-'	'-'	'-'	'-'	'-'
chr1	24754036	A	'-'	'-'	'-'	'-'	'-'	'-'	T	0/1	T	0/1	T	0/1	'-'
chr1	24754312	T	'-'	'-'	'-'	'-'	'-'	'-'	C	0/1	C	0/1	C	0/1	'-'
chr1	24755470	C	'-'	'-'	'-'	'-'	'-'	'-'	T	0/1	T	0/1	T	0/1	'-'
chr1	24776194	T	'-'	'-'	'-'	'-'	'-'	'-'	C	0/1	C	0/1	C	0/1	'-'
chr1	24847333	C	'-'	'-'	'-'	'-'	'-'	'-'	T	0/1	T	0/1	T	0/1	'-'
chr1	24847334	C	'-'	'-'	'-'	'-'	'-'	'-'	G	0/1	G	0/1	G	0/1	'-'
chr1	24847345	A	'-'	'-'	'-'	'-'	'-'	'-'	C	0/1	C	0/1	C	0/1	'-'
chr1	24847348	T	'-'	'-'	'-'	'-'	'-'	'-'	A	0/1	A	0/1	A	0/1	'-'
chr1	24863333	G	'-'	'-'	'-'	'-'	'-'	'-'	A	0/1	A	0/1	A	0/1	'-'
chr1	24896449	G	A	0/1	A	0/1	A	0/1	'-'	'-'	'-'	'-'	'-'	'-'	'-'
chr1	24905247	T	'-'	'-'	'-'	'-'	'-'	'-'	A	0/1	A	0/1	A	0/1	'-'
chr1	24905252	T	'-'	'-'	'-'	'-'	'-'	'-'	A	0/1	A	0/1	A	0/1	'-'
chr1	24905253	T	'-'	'-'	'-'	'-'	'-'	'-'	A	0/1	A	0/1	A	0/1	'-'
chr1	24930576	C	G	0/1	G	0/1	G	0/1	'-'	'-'	'-'	'-'	'-'	'-'	'-'
chr1	24963371	A	'-'	'-'	'-'	'-'	'-'	'-'	G	0/1	G	0/1	G	0/1	'-'
chr1	24963374	C	'-'	'-'	'-'	'-'	'-'	'-'	T	0/1	T	0/1	T	0/1	'-'
chr1	24963385	C	'-'	'-'	'-'	'-'	'-'	'-'	T	0/1	T	0/1	T	0/1	'-'
chr1	24964677	C	'-'	'-'	'-'	'-'	'-'	'-'	T	0/1	T	0/1	T	0/1	'-'
chr1	24992515	C	T	0/1	T	0/1	T	0/1	'-'	'-'	'-'	'-'	'-'	'-'	'-'
chr1	24996670	T	A	0/1	A	0/1	A	0/1	'-'	'-'	'-'	'-'	'-'	'-'	'-'
chr1	24996691	G	A	0/1	A	0/1	A	0/1	'-'	'-'	'-'	'-'	'-'	'-'	'-'
chr1	25002946	T	'-'	'-'	'-'	'-'	'-'	'-'	C	0/1	C	0/1	C	0/1	'-'
chr1	25002947	G	'-'	'-'	'-'	'-'	'-'	'-'	A	0/1	A	0/1	A	0/1	'-'
chr1	25002964	C	'-'	'-'	'-'	'-'	'-'	'-'	T	0/1	T	0/1	T	0/1	'-'
chr1	25004470	T	C	0/1	C	0/1	C	0/1	'-'	'-'	'-'	'-'	'-'	'-'	'-'
chr1	25014023	A	T	0/1	T	0/1	T	0/1	'-'	'-'	'-'	'-'	'-'	'-'	'-'
chr1	25017588	T	G	0/1	G	0/1	G	0/1	'-'	'-'	'-'	'-'	'-'	'-'	'-'
chr1	25026791	A	G	0/1	G	0/1	G	0/1	'-'	'-'	'-'	'-'	'-'	'-'	'-'
chr1	25028539	C	T	0/1	T	0/1	T	0/1	'-'	'-'	'-'	'-'	'-'	'-'	Cs1g22350
chr1	25037018	T	'-'	'-'	'-'	'-'	'-'	'-'	C	0/1	C	0/1	C	0/1	'-'
chr1	25038759	G	'-'	'-'	'-'	'-'	'-'	'-'	A	0/1	A	0/1	A	0/1	'-'
chr1	25038796	T	'-'	'-'	'-'	'-'	'-'	'-'	C	0/1	C	0/1	C	0/1	'-'
chr1	25049518	G	T	0/1	T	0/1	T	0/1	'-'	'-'	'-'	'-'	'-'	'-'	'-'
chr1	25049519	C	A	0/1	A	0/1	A	0/1	'-'	'-'	'-'	'-'	'-'	'-'	'-'
chr1	25049585	C	T	0/1	T	0/1	T	0/1	'-'	'-'	'-'	'-'	'-'	'-'	'-'
chr1	25066790	T	'-'	'-'	'-'	'-'	'-'	'-'	C	0/1	C	0/1	C	0/1	'-'
chr1	25071330	A	'-'	'-'	'-'	'-'	'-'	'-'	G	0/1	G	0/1	G	0/1	'-'
chr1	25073875	T	C	0/1	C	0/1	C	0/1	'-'	'-'	'-'	'-'	'-'	'-'	'-'
chr1	25091906	G	'-'	'-'	'-'	'-'	'-'	'-'	C	0/1	C	0/1	C	0/1	'-'
chr1	25128599	C	T	0/1	T	0/1	T	0/1	'-'	'-'	'-'	'-'	'-'	'-'	'-'
chr1	25142394	A	'-'	'-'	'-'	'-'	'-'	'-'	T	0/1	T	0/1	T	0/1	'-'
chr1	25144275	C	'-'	'-'	'-'	'-'	'-'	'-'	T	0/1	T	0/1	T	0/1	'-'
chr1	25147309	C	'-'	'-'	'-'	'-'	'-'	'-'	T	0/1	T	0/1	T	0/1	'-'
chr1	25147312	C	'-'	'-'	'-'	'-'	'-'	'-'	T	0/1	T	0/1	T	0/1	'-'
chr1	25163748	A	'-'	'-'	'-'	'-'	'-'	'-'	G	0/1	G	0/1	G	0/1	'-'
chr1	25174288	T	'-'	'-'	'-'	'-'	'-'	'-'	C	0/1	C	0/1	C	0/1	'-'
chr1	25206679	A	G	0/1	G	0/1	G	0/1	'-'	'-'	'-'	'-'	'-'	'-'	'-'
chr1	25220126	C	T	0/1	T	0/1	T	0/1	'-'	'-'	'-'	'-'	'-'	'-'	'-'
chr1	25220148	C	T	0/1	T	0/1	T	0/1	'-'	'-'	'-'	'-'	'-'	'-'	'-'
chr1	25220150	C	A	0/1	A	0/1	A	0/1	'-'	'-'	'-'	'-'	'-'	'-'	'-'
chr1	25220154	C	T	0/1	T	0/1	T	0/1	'-'	'-'	'-'	'-'	'-'	'-'	'-'
chr1	25220165	A	G	0/1	G	0/1	G	0/1	'-'	'-'	'-'	'-'	'-'	'-'	'-'
chr1	25220166	C	T	0/1	T	0/1	T	0/1	'-'	'-'	'-'	'-'	'-'	'-'	'-'
chr1	25239443	G	'-'	'-'	'-'	'-'	'-'	'-'	T	0/1	T	0/1	T	0/1	'-'
chr1	25244118	A	G	0/1	G	0/1	G	0/1	'-'	'-'	'-'	'-'	'-'	'-'	'-'
chr1	25245278	T	'-'	'-'	'-'	'-'	'-'	'-'	A	0/1	A	0/1	A	0/1	'-'
chr1	25271184	C	T	0/1	T	0/1	T	0/1	'-'	'-'	'-'	'-'	'-'	'-'	'-'
chr1	25274782	C	T	0/1	T	0/1	T	0/1	'-'	'-'	'-'	'-'	'-'	'-'	'-'
chr1	25274800	G	T	0/1	T	0/1	T	0/1	'-'	'-'	'-'	'-'	'-'	'-'	'-'
chr1	25277538	T	'-'	'-'	'-'	'-'	'-'	'-'	G	0/1	G	0/1	G	0/1	'-'
chr1	25277816	G	'-'	'-'	'-'	'-'	'-'	'-'	A	0/1	A	0/1	A	0/1	'-'
chr1	25302435	C	T	0/1	T	0/1	T	0/1	'-'	'-'	'-'	'-'	'-'	'-'	'-'
chr1	25302457	C	T	0/1	T	0/1	T	0/1	'-'	'-'	'-'	'-'	'-'	'-'	'-'
chr1	25302462	G	A	0/1	A	0/1	A	0/1	'-'	'-'	'-'	'-'	'-'	'-'	'-'
chr1	25302471	A	G	0/1	G	0/1	G	0/1	'-'	'-'	'-'	'-'	'-'	'-'	'-'
chr1	25302479	T	A	0/1	A	0/1	A	0/1	'-'	'-'	'-'	'-'	'-'	'-'	'-'
chr1	25302507	G	C	0/1	C	0/1	C	0/1	'-'	'-'	'-'	'-'	'-'	'-'	'-'
chr1	25341545	A	C	0/1	C	0/1	C	0/1	'-'	'-'	'-'	'-'	'-'	'-'	'-'
chr1	25341546	T	A	0/1	A	0/1	A	0/1	'-'	'-'	'-'	'-'	'-'	'-'	'-'
chr1	25355002	T	C	0/1	C	0/1	C	0/1	'-'	'-'	'-'	'-'	'-'	'-'	'-'
chr1	25355005	A	G	0/1	G	0/1	G	0/1	'-'	'-'	'-'	'-'	'-'	'-'	'-'
chr1	25358410	A	'-'	'-'	'-'	'-'	'-'	'-'	C	0/1	C	0/1	C	0/1	'-'
chr1	25387112	G	'-'	'-'	'-'	'-'	'-'	'-'	A	0/1	A	0/1	A	0/1	Cs1g22710
chr1	25387114	G	'-'	'-'	'-'	'-'	'-'	'-'	C	0/1	C	0/1	C	0/1	Cs1g22710
chr1	2539613	C	T	0/1	T	0/1	T	0/1	'-'	'-'	'-'	'-'	'-'	'-'	'-'
chr1	2539620	T	C	0/1	C	0/1	C	0/1	'-'	'-'	'-'	'-'	'-'	'-'	'-'
chr1	2539629	G	C	0/1	C	0/1	C	0/1	'-'	'-'	'-'	'-'	'-'	'-'	'-'
chr1	25421067	G	'-'	'-'	'-'	'-'	'-'	'-'	C	0/1	C	0/1	C	0/1	'-'
chr1	25423234	G	A	0/1	A	0/1	A	0/1	'-'	'-'	'-'	'-'	'-'	'-'	'-'
chr1	25433753	C	T	0/1	T	0/1	T	0/1	'-'	'-'	'-'	'-'	'-'	'-'	'-'
chr1	25446043	G	C	0/1	C	0/1	C	0/1	'-'	'-'	'-'	'-'	'-'	'-'	'-'
chr1	25465822	A	'-'	'-'	'-'	'-'	'-'	'-'	G	0/1	G	0/1	G	0/1	'-'
chr1	25510016	C	T	0/1	T	0/1	T	0/1	'-'	'-'	'-'	'-'	'-'	'-'	'-'
chr1	25510873	T	'-'	'-'	'-'	'-'	'-'	'-'	G	0/1	G	0/1	G	0/1	'-'
chr1	25526790	T	C	0/1	C	0/1	C	0/1	'-'	'-'	'-'	'-'	'-'	'-'	'-'
chr1	25530611	T	C	0/1	C	0/1	C	0/1	'-'	'-'	'-'	'-'	'-'	'-'	'-'
chr1	25530639	G	A	0/1	A	0/1	A	0/1	'-'	'-'	'-'	'-'	'-'	'-'	'-'
chr1	25530648	A	G	0/1	G	0/1	G	0/1	'-'	'-'	'-'	'-'	'-'	'-'	'-'
chr1	25531361	T	C	0/1	C	0/1	C	0/1	'-'	'-'	'-'	'-'	'-'	'-'	'-'
chr1	25531362	T	C	0/1	C	0/1	C	0/1	'-'	'-'	'-'	'-'	'-'	'-'	'-'
chr1	2554695	A	C	0/1	C	0/1	C	0/1	'-'	'-'	'-'	'-'	'-'	'-'	'-'
chr1	25548131	A	G	0/1	G	0/1	G	0/1	'-'	'-'	'-'	'-'	'-'	'-'	'-'
chr1	25548136	A	C	0/1	C	0/1	C	0/1	'-'	'-'	'-'	'-'	'-'	'-'	'-'
chr1	25568001	C	T	0/1	T	0/1	T	0/1	'-'	'-'	'-'	'-'	'-'	'-'	'-'
chr1	25573735	T	'-'	'-'	'-'	'-'	'-'	'-'	G	0/1	G	0/1	G	0/1	'-'
chr1	25598264	T	A	0/1	A	0/1	A	0/1	'-'	'-'	'-'	'-'	'-'	'-'	'-'
chr1	25636084	G	A	0/1	A	0/1	A	0/1	A	0/1	A	0/1	A	0/1	'-'
chr1	25642138	T	'-'	'-'	'-'	'-'	'-'	'-'	A	0/1	A	0/1	A	0/1	Cs1g22970
chr1	25644794	T	G	0/1	G	0/1	G	0/1	'-'	'-'	'-'	'-'	'-'	'-'	'-'
chr1	25651693	T	'-'	'-'	'-'	'-'	'-'	'-'	C	0/1	C	0/1	C	0/1	'-'
chr1	25704105	T	C	0/1	C	0/1	C	0/1	'-'	'-'	'-'	'-'	'-'	'-'	'-'
chr1	25726111	G	A	0/1	A	0/1	A	0/1	'-'	'-'	'-'	'-'	'-'	'-'	'-'
chr1	25726140	G	A	0/1	A	0/1	A	0/1	'-'	'-'	'-'	'-'	'-'	'-'	'-'
chr1	25740937	G	A	0/1	A	0/1	A	0/1	'-'	'-'	'-'	'-'	'-'	'-'	'-'
chr1	25740947	C	G	0/1	G	0/1	G	0/1	'-'	'-'	'-'	'-'	'-'	'-'	'-'
chr1	25745065	A	T	0/1	T	0/1	T	0/1	'-'	'-'	'-'	'-'	'-'	'-'	Cs1g23120
chr1	25747740	C	G	0/1	G	0/1	G	0/1	A	0/1	A	0/1	A	0/1	'-'
chr1	25777937	C	'-'	'-'	'-'	'-'	'-'	'-'	T	0/1	T	0/1	T	0/1	'-'
chr1	25778976	T	C	0/1	C	0/1	C	0/1	'-'	'-'	'-'	'-'	'-'	'-'	'-'
chr1	25778979	T	C	0/1	C	0/1	C	0/1	'-'	'-'	'-'	'-'	'-'	'-'	'-'
chr1	25778989	G	T	0/1	T	0/1	T	0/1	'-'	'-'	'-'	'-'	'-'	'-'	'-'
chr1	25779062	T	'-'	'-'	'-'	'-'	'-'	'-'	A	0/1	A	0/1	A	0/1	'-'
chr1	25780342	A	'-'	'-'	'-'	'-'	'-'	'-'	T	0/1	T	0/1	T	0/1	'-'
chr1	25780406	G	'-'	'-'	'-'	'-'	'-'	'-'	A	0/1	A	0/1	A	0/1	'-'
chr1	25782063	T	'-'	'-'	'-'	'-'	'-'	'-'	C	0/1	C	0/1	C	0/1	'-'
chr1	25800481	G	'-'	'-'	'-'	'-'	'-'	'-'	T	0/1	T	0/1	T	0/1	'-'
chr1	25838460	G	T	0/1	T	0/1	T	0/1	T	0/1	T	0/1	T	0/1	'-'
chr1	25839926	A	T	0/1	T	0/1	T	0/1	T	0/1	T	0/1	T	0/1	'-'
chr1	25918381	C	'-'	'-'	'-'	'-'	'-'	'-'	T	0/1	T	0/1	T	0/1	'-'
chr1	25923714	C	G	0/1	G	0/1	G	0/1	'-'	'-'	'-'	'-'	'-'	'-'	'-'
chr1	25937213	C	T	0/1	T	0/1	T	0/1	'-'	'-'	'-'	'-'	'-'	'-'	'-'
chr1	25938059	T	A	0/1	A	0/1	A	0/1	'-'	'-'	'-'	'-'	'-'	'-'	'-'
chr1	25938081	A	G	0/1	G	0/1	G	0/1	'-'	'-'	'-'	'-'	'-'	'-'	'-'
chr1	25945107	A	'-'	'-'	'-'	'-'	'-'	'-'	C	0/1	C	0/1	C	0/1	'-'
chr1	25956801	T	A	0/1	A	0/1	A	0/1	'-'	'-'	'-'	'-'	'-'	'-'	'-'
chr1	26010285	G	A	0/1	A	0/1	A	0/1	'-'	'-'	'-'	'-'	'-'	'-'	'-'
chr1	26012820	T	'-'	'-'	'-'	'-'	'-'	'-'	A	0/1	A	0/1	A	0/1	'-'
chr1	26012825	A	'-'	'-'	'-'	'-'	'-'	'-'	G	0/1	G	0/1	G	0/1	'-'
chr1	26012826	C	'-'	'-'	'-'	'-'	'-'	'-'	T	0/1	T	0/1	T	0/1	'-'
chr1	26012835	T	'-'	'-'	'-'	'-'	'-'	'-'	A	0/1	A	0/1	A	0/1	'-'
chr1	26012836	C	'-'	'-'	'-'	'-'	'-'	'-'	T	0/1	T	0/1	T	0/1	'-'
chr1	26012845	G	'-'	'-'	'-'	'-'	'-'	'-'	A	0/1	A	0/1	A	0/1	'-'
chr1	26038072	T	C	0/1	C	0/1	C	0/1	'-'	'-'	'-'	'-'	'-'	'-'	'-'
chr1	26038094	A	G	0/1	G	0/1	G	0/1	'-'	'-'	'-'	'-'	'-'	'-'	'-'
chr1	26038095	C	G	0/1	G	0/1	G	0/1	'-'	'-'	'-'	'-'	'-'	'-'	'-'
chr1	26038182	G	T	0/1	T	0/1	T	0/1	'-'	'-'	'-'	'-'	'-'	'-'	'-'
chr1	26040242	C	'-'	'-'	'-'	'-'	'-'	'-'	A	0/1	A	0/1	A	0/1	'-'
chr1	261084	T	'-'	'-'	'-'	'-'	'-'	'-'	G	0/1	G	0/1	G	0/1	Cs1g01170
chr1	26131101	T	A	0/1	A	0/1	A	0/1	'-'	'-'	'-'	'-'	'-'	'-'	'-'
chr1	26131150	G	A	0/1	A	0/1	A	0/1	'-'	'-'	'-'	'-'	'-'	'-'	'-'
chr1	26148809	T	A	0/1	A	0/1	A	0/1	'-'	'-'	'-'	'-'	'-'	'-'	'-'
chr1	26148817	T	A	0/1	A	0/1	A	0/1	'-'	'-'	'-'	'-'	'-'	'-'	'-'
chr1	26165527	A	'-'	'-'	'-'	'-'	'-'	'-'	G	0/1	G	0/1	G	0/1	'-'
chr1	26177330	C	'-'	'-'	'-'	'-'	'-'	'-'	T	0/1	T	0/1	T	0/1	'-'
chr1	26177743	C	'-'	'-'	'-'	'-'	'-'	'-'	T	0/1	T	0/1	T	0/1	'-'
chr1	26221048	A	T	0/1	T	0/1	T	0/1	'-'	'-'	'-'	'-'	'-'	'-'	'-'
chr1	26221076	C	T	0/1	T	0/1	T	0/1	'-'	'-'	'-'	'-'	'-'	'-'	'-'
chr1	26224609	T	A	0/1	A	0/1	A	0/1	'-'	'-'	'-'	'-'	'-'	'-'	'-'
chr1	26228316	A	G	0/1	G	0/1	G	0/1	'-'	'-'	'-'	'-'	'-'	'-'	'-'
chr1	26228349	A	G	0/1	G	0/1	G	0/1	'-'	'-'	'-'	'-'	'-'	'-'	'-'
chr1	26231596	G	'-'	'-'	'-'	'-'	'-'	'-'	T	0/1	T	0/1	T	0/1	'-'
chr1	26243067	T	C	0/1	C	0/1	C	0/1	'-'	'-'	'-'	'-'	'-'	'-'	'-'
chr1	26243079	C	T	0/1	T	0/1	T	0/1	'-'	'-'	'-'	'-'	'-'	'-'	'-'
chr1	26243081	T	A	0/1	A	0/1	A	0/1	'-'	'-'	'-'	'-'	'-'	'-'	'-'
chr1	26243094	C	T	0/1	T	0/1	T	0/1	'-'	'-'	'-'	'-'	'-'	'-'	'-'
chr1	26270367	T	C	0/1	C	0/1	C	0/1	C	0/1	C	0/1	C	0/1	'-'
chr1	26285761	A	T	0/1	T	0/1	T	0/1	'-'	'-'	'-'	'-'	'-'	'-'	'-'
chr1	26321283	T	C	0/1	C	0/1	C	0/1	'-'	'-'	'-'	'-'	'-'	'-'	'-'
chr1	26321284	G	A	0/1	A	0/1	A	0/1	'-'	'-'	'-'	'-'	'-'	'-'	'-'
chr1	26321294	T	A	0/1	A	0/1	A	0/1	'-'	'-'	'-'	'-'	'-'	'-'	'-'
chr1	26321324	T	C	0/1	C	0/1	C	0/1	'-'	'-'	'-'	'-'	'-'	'-'	'-'
chr1	2635921	C	'-'	'-'	'-'	'-'	'-'	'-'	G	0/1	G	0/1	G	0/1	Cs1g03430
chr1	26360164	T	G	0/1	G	0/1	G	0/1	'-'	'-'	'-'	'-'	'-'	'-'	'-'
chr1	26382686	A	'-'	'-'	'-'	'-'	'-'	'-'	G	0/1	G	0/1	G	0/1	'-'
chr1	26391347	G	T	0/1	T	0/1	T	0/1	'-'	'-'	'-'	'-'	'-'	'-'	'-'
chr1	26391349	G	T	0/1	T	0/1	T	0/1	'-'	'-'	'-'	'-'	'-'	'-'	'-'
chr1	26391350	A	T	0/1	T	0/1	T	0/1	'-'	'-'	'-'	'-'	'-'	'-'	'-'
chr1	26398826	G	'-'	'-'	'-'	'-'	'-'	'-'	C	0/1	C	0/1	C	0/1	'-'
chr1	26398831	T	'-'	'-'	'-'	'-'	'-'	'-'	G	0/1	G	0/1	G	0/1	'-'
chr1	26417114	C	T	0/1	T	0/1	T	0/1	'-'	'-'	'-'	'-'	'-'	'-'	'-'
chr1	26417121	C	T	0/1	T	0/1	T	0/1	'-'	'-'	'-'	'-'	'-'	'-'	'-'
chr1	26417128	G	A	0/1	A	0/1	A	0/1	'-'	'-'	'-'	'-'	'-'	'-'	'-'
chr1	26454907	T	A	0/1	A	0/1	A	0/1	'-'	'-'	'-'	'-'	'-'	'-'	'-'
chr1	26456696	G	A	0/1	A	0/1	A	0/1	'-'	'-'	'-'	'-'	'-'	'-'	'-'
chr1	26471246	A	G	0/1	G	0/1	G	0/1	'-'	'-'	'-'	'-'	'-'	'-'	'-'
chr1	26493833	T	G	0/1	G	0/1	G	0/1	'-'	'-'	'-'	'-'	'-'	'-'	'-'
chr1	26494569	T	A	0/1	A	0/1	A	0/1	'-'	'-'	'-'	'-'	'-'	'-'	'-'
chr1	26495808	A	G	0/1	G	0/1	G	0/1	'-'	'-'	'-'	'-'	'-'	'-'	'-'
chr1	26496995	T	C	0/1	C	0/1	C	0/1	'-'	'-'	'-'	'-'	'-'	'-'	'-'
chr1	26504852	A	G	0/1	G	0/1	G	0/1	'-'	'-'	'-'	'-'	'-'	'-'	'-'
chr1	26528158	G	'-'	'-'	'-'	'-'	'-'	'-'	T	0/1	T	0/1	T	0/1	'-'
chr1	26535786	G	'-'	'-'	'-'	'-'	'-'	'-'	A	0/1	A	0/1	A	0/1	'-'
chr1	26535788	T	'-'	'-'	'-'	'-'	'-'	'-'	C	0/1	C	0/1	C	0/1	'-'
chr1	26542763	G	'-'	'-'	'-'	'-'	'-'	'-'	A	0/1	A	0/1	A	0/1	'-'
chr1	26542785	T	'-'	'-'	'-'	'-'	'-'	'-'	A	0/1	A	0/1	A	0/1	'-'
chr1	26542799	C	'-'	'-'	'-'	'-'	'-'	'-'	T	0/1	T	0/1	T	0/1	'-'
chr1	26544382	T	'-'	'-'	'-'	'-'	'-'	'-'	G	0/1	G	0/1	G	0/1	'-'
chr1	26593524	T	C	0/1	C	0/1	C	0/1	'-'	'-'	'-'	'-'	'-'	'-'	'-'
chr1	26594148	C	'-'	'-'	'-'	'-'	'-'	'-'	A	0/1	A	0/1	A	0/1	'-'
chr1	26631690	C	'-'	'-'	'-'	'-'	'-'	'-'	T	0/1	T	0/1	T	0/1	Cs1g24190
chr1	2665815	T	'-'	'-'	'-'	'-'	'-'	'-'	C	0/1	C	0/1	C	0/1	'-'
chr1	26669759	A	'-'	'-'	'-'	'-'	'-'	'-'	T	0/1	T	0/1	T	0/1	'-'
chr1	26672310	C	A	0/1	A	0/1	A	0/1	'-'	'-'	'-'	'-'	'-'	'-'	'-'
chr1	26672327	T	C	0/1	C	0/1	C	0/1	'-'	'-'	'-'	'-'	'-'	'-'	'-'
chr1	26672329	G	T	0/1	T	0/1	T	0/1	'-'	'-'	'-'	'-'	'-'	'-'	'-'
chr1	26672370	G	A	0/1	A	0/1	A	0/1	'-'	'-'	'-'	'-'	'-'	'-'	'-'
chr1	26688903	G	'-'	'-'	'-'	'-'	'-'	'-'	A	0/1	A	0/1	A	0/1	'-'
chr1	26729587	T	C	0/1	C	0/1	C	0/1	'-'	'-'	'-'	'-'	'-'	'-'	'-'
chr1	26765789	C	A	0/1	A	0/1	A	0/1	'-'	'-'	'-'	'-'	'-'	'-'	'-'
chr1	26765796	T	A	0/1	A	0/1	A	0/1	'-'	'-'	'-'	'-'	'-'	'-'	'-'
chr1	26781351	T	C	0/1	C	0/1	C	0/1	'-'	'-'	'-'	'-'	'-'	'-'	'-'
chr1	26781352	A	C	0/1	C	0/1	C	0/1	'-'	'-'	'-'	'-'	'-'	'-'	'-'
chr1	26801212	C	T	0/1	T	0/1	T	0/1	'-'	'-'	'-'	'-'	'-'	'-'	'-'
chr1	26809405	G	A	0/1	A	0/1	A	0/1	'-'	'-'	'-'	'-'	'-'	'-'	'-'
chr1	26809410	C	A	0/1	A	0/1	A	0/1	'-'	'-'	'-'	'-'	'-'	'-'	'-'
chr1	26809419	T	A	0/1	A	0/1	A	0/1	'-'	'-'	'-'	'-'	'-'	'-'	'-'
chr1	26818506	A	T	0/1	T	0/1	T	0/1	'-'	'-'	'-'	'-'	'-'	'-'	'-'
chr1	26828140	C	T	0/1	T	0/1	T	0/1	'-'	'-'	'-'	'-'	'-'	'-'	'-'
chr1	26847120	C	'-'	'-'	'-'	'-'	'-'	'-'	T	0/1	T	0/1	T	0/1	'-'
chr1	26847155	T	'-'	'-'	'-'	'-'	'-'	'-'	C	0/1	C	0/1	C	0/1	'-'
chr1	26869279	T	'-'	'-'	'-'	'-'	'-'	'-'	A	0/1	A	0/1	A	0/1	'-'
chr1	26869286	T	'-'	'-'	'-'	'-'	'-'	'-'	A	0/1	A	0/1	A	0/1	'-'
chr1	2690066	C	'-'	'-'	'-'	'-'	'-'	'-'	T	0/1	T	0/1	T	0/1	'-'
chr1	2690068	G	'-'	'-'	'-'	'-'	'-'	'-'	A	0/1	A	0/1	A	0/1	'-'
chr1	2690069	C	'-'	'-'	'-'	'-'	'-'	'-'	T	0/1	T	0/1	T	0/1	'-'
chr1	26903795	T	C	0/1	C	0/1	C	0/1	'-'	'-'	'-'	'-'	'-'	'-'	'-'
chr1	26903796	C	T	0/1	T	0/1	T	0/1	'-'	'-'	'-'	'-'	'-'	'-'	'-'
chr1	26903803	C	T	0/1	T	0/1	T	0/1	'-'	'-'	'-'	'-'	'-'	'-'	'-'
chr1	26903805	G	C	0/1	C	0/1	C	0/1	'-'	'-'	'-'	'-'	'-'	'-'	'-'
chr1	26903812	G	C	0/1	C	0/1	C	0/1	'-'	'-'	'-'	'-'	'-'	'-'	'-'
chr1	26913134	T	A	0/1	A	0/1	A	0/1	'-'	'-'	'-'	'-'	'-'	'-'	'-'
chr1	26995247	G	'-'	'-'	'-'	'-'	'-'	'-'	T	0/1	T	0/1	T	0/1	'-'
chr1	26996512	C	A	0/1	A	0/1	A	0/1	'-'	'-'	'-'	'-'	'-'	'-'	'-'
chr1	27032371	T	C	0/1	C	0/1	C	0/1	'-'	'-'	'-'	'-'	'-'	'-'	'-'
chr1	27032380	A	G	0/1	G	0/1	G	0/1	'-'	'-'	'-'	'-'	'-'	'-'	'-'
chr1	27051067	C	'-'	'-'	'-'	'-'	'-'	'-'	A	0/1	A	0/1	A	0/1	'-'
chr1	27051070	A	'-'	'-'	'-'	'-'	'-'	'-'	T	0/1	T	0/1	T	0/1	'-'
chr1	27051071	G	'-'	'-'	'-'	'-'	'-'	'-'	A	0/1	A	0/1	A	0/1	'-'
chr1	27058666	T	C	0/1	C	0/1	C	0/1	'-'	'-'	'-'	'-'	'-'	'-'	'-'
chr1	27084750	C	G	0/1	G	0/1	G	0/1	'-'	'-'	'-'	'-'	'-'	'-'	'-'
chr1	27084754	A	C	0/1	C	0/1	C	0/1	'-'	'-'	'-'	'-'	'-'	'-'	'-'
chr1	27084757	T	G	0/1	G	0/1	G	0/1	'-'	'-'	'-'	'-'	'-'	'-'	'-'
chr1	27093000	G	'-'	'-'	'-'	'-'	'-'	'-'	T	0/1	T	0/1	T	0/1	'-'
chr1	2710147	T	C	0/1	C	0/1	C	0/1	'-'	'-'	'-'	'-'	'-'	'-'	'-'
chr1	2710151	G	A	0/1	A	0/1	A	0/1	'-'	'-'	'-'	'-'	'-'	'-'	'-'
chr1	27149355	C	G	0/1	G	0/1	G	0/1	'-'	'-'	'-'	'-'	'-'	'-'	'-'
chr1	27165207	C	'-'	'-'	'-'	'-'	'-'	'-'	T	0/1	T	0/1	T	0/1	'-'
chr1	27165211	T	'-'	'-'	'-'	'-'	'-'	'-'	C	0/1	C	0/1	C	0/1	'-'
chr1	27174659	A	T	0/1	T	0/1	T	0/1	'-'	'-'	'-'	'-'	'-'	'-'	'-'
chr1	27175376	T	'-'	'-'	'-'	'-'	'-'	'-'	C	0/1	C	0/1	C	0/1	'-'
chr1	27181390	A	G	0/1	G	0/1	G	0/1	'-'	'-'	'-'	'-'	'-'	'-'	'-'
chr1	27250172	C	'-'	'-'	'-'	'-'	'-'	'-'	T	0/1	T	0/1	T	0/1	'-'
chr1	2725872	T	C	0/1	C	0/1	C	0/1	'-'	'-'	'-'	'-'	'-'	'-'	'-'
chr1	27270497	A	'-'	'-'	'-'	'-'	'-'	'-'	G	0/1	G	0/1	G	0/1	'-'
chr1	27276575	C	T	0/1	T	0/1	T	0/1	'-'	'-'	'-'	'-'	'-'	'-'	'-'
chr1	27287643	G	A	0/1	A	0/1	A	0/1	'-'	'-'	'-'	'-'	'-'	'-'	'-'
chr1	27290934	C	T	0/1	T	0/1	T	0/1	'-'	'-'	'-'	'-'	'-'	'-'	'-'
chr1	27290963	A	G	0/1	G	0/1	G	0/1	'-'	'-'	'-'	'-'	'-'	'-'	'-'
chr1	27290995	T	C	0/1	C	0/1	C	0/1	'-'	'-'	'-'	'-'	'-'	'-'	'-'
chr1	27290998	A	G	0/1	G	0/1	G	0/1	'-'	'-'	'-'	'-'	'-'	'-'	'-'
chr1	27291017	T	A	0/1	A	0/1	A	0/1	'-'	'-'	'-'	'-'	'-'	'-'	'-'
chr1	27291030	T	C	0/1	C	0/1	C	0/1	'-'	'-'	'-'	'-'	'-'	'-'	'-'
chr1	27310373	G	A	0/1	A	0/1	A	0/1	'-'	'-'	'-'	'-'	'-'	'-'	'-'
chr1	27310377	T	C	0/1	C	0/1	C	0/1	'-'	'-'	'-'	'-'	'-'	'-'	'-'
chr1	27346572	T	'-'	'-'	'-'	'-'	'-'	'-'	A	0/1	A	0/1	A	0/1	Cs1g25140
chr1	273504	G	A	0/1	A	0/1	A	0/1	A	0/1	A	0/1	A	0/1	'-'
chr1	27367501	G	A	0/1	A	0/1	A	0/1	'-'	'-'	'-'	'-'	'-'	'-'	'-'
chr1	27367505	G	A	0/1	A	0/1	A	0/1	'-'	'-'	'-'	'-'	'-'	'-'	'-'
chr1	27370172	A	G	0/1	G	0/1	G	0/1	'-'	'-'	'-'	'-'	'-'	'-'	'-'
chr1	27383133	T	C	0/1	C	0/1	C	0/1	'-'	'-'	'-'	'-'	'-'	'-'	'-'
chr1	27383144	C	G	0/1	G	0/1	G	0/1	'-'	'-'	'-'	'-'	'-'	'-'	'-'
chr1	2739302	T	'-'	'-'	'-'	'-'	'-'	'-'	A	0/1	A	0/1	A	0/1	'-'
chr1	27394665	G	T	0/1	T	0/1	T	0/1	'-'	'-'	'-'	'-'	'-'	'-'	'-'
chr1	27465598	A	'-'	'-'	'-'	'-'	'-'	'-'	G	0/1	G	0/1	G	0/1	'-'
chr1	27466435	C	G	0/1	G	0/1	G	0/1	'-'	'-'	'-'	'-'	'-'	'-'	'-'
chr1	27466439	G	A	0/1	A	0/1	A	0/1	'-'	'-'	'-'	'-'	'-'	'-'	'-'
chr1	27466447	T	C	0/1	C	0/1	C	0/1	'-'	'-'	'-'	'-'	'-'	'-'	'-'
chr1	27468573	C	'-'	'-'	'-'	'-'	'-'	'-'	T	0/1	T	0/1	T	0/1	'-'
chr1	27468633	T	'-'	'-'	'-'	'-'	'-'	'-'	G	0/1	G	0/1	G	0/1	'-'
chr1	27539722	T	C	0/1	C	0/1	C	0/1	'-'	'-'	'-'	'-'	'-'	'-'	'-'
chr1	27602153	T	G	0/1	G	0/1	G	0/1	'-'	'-'	'-'	'-'	'-'	'-'	'-'
chr1	27603414	T	'-'	'-'	'-'	'-'	'-'	'-'	C	0/1	C	0/1	C	0/1	'-'
chr1	27610009	G	A	0/1	A	0/1	A	0/1	'-'	'-'	'-'	'-'	'-'	'-'	'-'
chr1	27610109	C	T	0/1	T	0/1	T	0/1	'-'	'-'	'-'	'-'	'-'	'-'	'-'
chr1	27628917	A	T	0/1	T	0/1	T	0/1	'-'	'-'	'-'	'-'	'-'	'-'	'-'
chr1	27667983	G	'-'	'-'	'-'	'-'	'-'	'-'	C	0/1	C	0/1	C	0/1	'-'
chr1	27690399	C	'-'	'-'	'-'	'-'	'-'	'-'	T	0/1	T	0/1	T	0/1	'-'
chr1	27740731	G	'-'	'-'	'-'	'-'	'-'	'-'	A	0/1	A	0/1	A	0/1	'-'
chr1	27779832	G	T	0/1	T	0/1	T	0/1	'-'	'-'	'-'	'-'	'-'	'-'	'-'
chr1	27782226	G	C	0/1	C	0/1	C	0/1	'-'	'-'	'-'	'-'	'-'	'-'	'-'
chr1	2778503	T	C	0/1	C	0/1	C	0/1	'-'	'-'	'-'	'-'	'-'	'-'	'-'
chr1	27816571	G	A	0/1	A	0/1	A	0/1	'-'	'-'	'-'	'-'	'-'	'-'	'-'
chr1	27820567	G	T	0/1	T	0/1	T	0/1	'-'	'-'	'-'	'-'	'-'	'-'	'-'
chr1	27820593	C	T	0/1	T	0/1	T	0/1	'-'	'-'	'-'	'-'	'-'	'-'	'-'
chr1	27820598	A	T	0/1	T	0/1	T	0/1	'-'	'-'	'-'	'-'	'-'	'-'	'-'
chr1	27820599	G	A	0/1	A	0/1	A	0/1	'-'	'-'	'-'	'-'	'-'	'-'	'-'
chr1	27821244	A	T	0/1	T	0/1	T	0/1	'-'	'-'	'-'	'-'	'-'	'-'	'-'
chr1	27828556	G	'-'	'-'	'-'	'-'	'-'	'-'	A	0/1	A	0/1	A	0/1	'-'
chr1	27828557	G	'-'	'-'	'-'	'-'	'-'	'-'	A	0/1	A	0/1	A	0/1	'-'
chr1	27873540	C	'-'	'-'	'-'	'-'	'-'	'-'	T	0/1	T	0/1	T	0/1	'-'
chr1	27873542	T	'-'	'-'	'-'	'-'	'-'	'-'	A	0/1	A	0/1	A	0/1	'-'
chr1	27912680	C	T	0/1	T	0/1	T	0/1	'-'	'-'	'-'	'-'	'-'	'-'	'-'
chr1	27919973	G	A	0/1	A	0/1	A	0/1	'-'	'-'	'-'	'-'	'-'	'-'	'-'
chr1	27923208	A	G	0/1	G	0/1	G	0/1	'-'	'-'	'-'	'-'	'-'	'-'	'-'
chr1	27936670	G	'-'	'-'	'-'	'-'	'-'	'-'	T	0/1	T	0/1	T	0/1	'-'
chr1	279448	C	A	0/1	A	0/1	A	0/1	'-'	'-'	'-'	'-'	'-'	'-'	'-'
chr1	279464	C	T	0/1	T	0/1	T	0/1	'-'	'-'	'-'	'-'	'-'	'-'	'-'
chr1	27963560	G	'-'	'-'	'-'	'-'	'-'	'-'	A	0/1	A	0/1	A	0/1	'-'
chr1	27963924	T	C	0/1	C	0/1	C	0/1	'-'	'-'	'-'	'-'	'-'	'-'	'-'
chr1	27963934	G	T	0/1	T	0/1	T	0/1	'-'	'-'	'-'	'-'	'-'	'-'	'-'
chr1	27984719	T	'-'	'-'	'-'	'-'	'-'	'-'	C	0/1	C	0/1	C	0/1	'-'
chr1	27996835	T	A	0/1	A	0/1	A	0/1	'-'	'-'	'-'	'-'	'-'	'-'	'-'
chr1	280106	G	C	0/1	C	0/1	C	0/1	'-'	'-'	'-'	'-'	'-'	'-'	'-'
chr1	280110	C	T	0/1	T	0/1	T	0/1	'-'	'-'	'-'	'-'	'-'	'-'	'-'
chr1	280112	T	G	0/1	G	0/1	G	0/1	'-'	'-'	'-'	'-'	'-'	'-'	'-'
chr1	28023812	G	A	0/1	A	0/1	A	0/1	'-'	'-'	'-'	'-'	'-'	'-'	'-'
chr1	28023819	T	C	0/1	C	0/1	C	0/1	'-'	'-'	'-'	'-'	'-'	'-'	'-'
chr1	28023876	A	C	0/1	C	0/1	C	0/1	'-'	'-'	'-'	'-'	'-'	'-'	'-'
chr1	28052264	C	T	0/1	T	0/1	T	0/1	'-'	'-'	'-'	'-'	'-'	'-'	'-'
chr1	28088151	A	'-'	'-'	'-'	'-'	'-'	'-'	C	0/1	C	0/1	C	0/1	'-'
chr1	28096329	T	C	0/1	C	0/1	C	0/1	'-'	'-'	'-'	'-'	'-'	'-'	'-'
chr1	28096332	G	C	0/1	C	0/1	C	0/1	'-'	'-'	'-'	'-'	'-'	'-'	'-'
chr1	28137784	T	A	0/1	A	0/1	A	0/1	'-'	'-'	'-'	'-'	'-'	'-'	'-'
chr1	28137791	C	T	0/1	T	0/1	T	0/1	'-'	'-'	'-'	'-'	'-'	'-'	'-'
chr1	28181253	T	'-'	'-'	'-'	'-'	'-'	'-'	A	0/1	A	0/1	A	0/1	'-'
chr1	28181266	T	'-'	'-'	'-'	'-'	'-'	'-'	A	0/1	A	0/1	A	0/1	'-'
chr1	28181275	A	'-'	'-'	'-'	'-'	'-'	'-'	G	0/1	G	0/1	G	0/1	'-'
chr1	28181278	T	'-'	'-'	'-'	'-'	'-'	'-'	C	0/1	C	0/1	C	0/1	'-'
chr1	28181279	T	'-'	'-'	'-'	'-'	'-'	'-'	C	0/1	C	0/1	C	0/1	'-'
chr1	28181296	C	'-'	'-'	'-'	'-'	'-'	'-'	T	0/1	T	0/1	T	0/1	'-'
chr1	28181840	C	'-'	'-'	'-'	'-'	'-'	'-'	G	0/1	G	0/1	G	0/1	'-'
chr1	28192002	G	A	0/1	A	0/1	A	0/1	'-'	'-'	'-'	'-'	'-'	'-'	'-'
chr1	28192017	A	G	0/1	G	0/1	G	0/1	'-'	'-'	'-'	'-'	'-'	'-'	'-'
chr1	28192018	A	G	0/1	G	0/1	G	0/1	'-'	'-'	'-'	'-'	'-'	'-'	'-'
chr1	28192715	A	'-'	'-'	'-'	'-'	'-'	'-'	T	0/1	T	0/1	T	0/1	'-'
chr1	28192730	T	'-'	'-'	'-'	'-'	'-'	'-'	C	0/1	C	0/1	C	0/1	'-'
chr1	2820535	T	C	0/1	C	0/1	C	0/1	'-'	'-'	'-'	'-'	'-'	'-'	'-'
chr1	28212621	A	'-'	'-'	'-'	'-'	'-'	'-'	G	0/1	G	0/1	G	0/1	'-'
chr1	28215841	A	C	0/1	C	0/1	C	0/1	'-'	'-'	'-'	'-'	'-'	'-'	'-'
chr1	28215852	C	A	0/1	A	0/1	A	0/1	'-'	'-'	'-'	'-'	'-'	'-'	'-'
chr1	28215854	T	A	0/1	A	0/1	A	0/1	'-'	'-'	'-'	'-'	'-'	'-'	'-'
chr1	28252512	C	'-'	'-'	'-'	'-'	'-'	'-'	T	0/1	T	0/1	T	0/1	'-'
chr1	28271013	A	'-'	'-'	'-'	'-'	'-'	'-'	T	0/1	T	0/1	T	0/1	'-'
chr1	28275178	G	T	0/1	T	0/1	T	0/1	'-'	'-'	'-'	'-'	'-'	'-'	'-'
chr1	28307703	T	'-'	'-'	'-'	'-'	'-'	'-'	A	0/1	A	0/1	A	0/1	'-'
chr1	28310190	T	A	0/1	A	0/1	A	0/1	'-'	'-'	'-'	'-'	'-'	'-'	'-'
chr1	28310195	G	A	0/1	A	0/1	A	0/1	'-'	'-'	'-'	'-'	'-'	'-'	'-'
chr1	28310280	C	'-'	'-'	'-'	'-'	'-'	'-'	T	0/1	T	0/1	T	0/1	'-'
chr1	28310295	A	'-'	'-'	'-'	'-'	'-'	'-'	G	0/1	G	0/1	G	0/1	'-'
chr1	2835427	A	'-'	'-'	'-'	'-'	'-'	'-'	G	0/1	G	0/1	G	0/1	'-'
chr1	28359854	G	'-'	'-'	'-'	'-'	'-'	'-'	A	0/1	A	0/1	A	0/1	'-'
chr1	28359942	A	'-'	'-'	'-'	'-'	'-'	'-'	T	0/1	T	0/1	T	0/1	'-'
chr1	28386412	A	G	0/1	G	0/1	G	0/1	'-'	'-'	'-'	'-'	'-'	'-'	'-'
chr1	28391924	A	'-'	'-'	'-'	'-'	'-'	'-'	G	0/1	G	0/1	G	0/1	'-'
chr1	28396914	T	C	0/1	C	0/1	C	0/1	C	0/1	C	0/1	C	0/1	'-'
chr1	28404809	C	A	0/1	A	0/1	A	0/1	'-'	'-'	'-'	'-'	'-'	'-'	'-'
chr1	28404816	A	C	0/1	C	0/1	C	0/1	'-'	'-'	'-'	'-'	'-'	'-'	'-'
chr1	28404819	G	A	0/1	A	0/1	A	0/1	'-'	'-'	'-'	'-'	'-'	'-'	'-'
chr1	2840577	T	'-'	'-'	'-'	'-'	'-'	'-'	G	0/1	G	0/1	G	0/1	'-'
chr1	28408473	C	T	0/1	T	0/1	T	0/1	'-'	'-'	'-'	'-'	'-'	'-'	'-'
chr1	28423658	A	G	0/1	G	0/1	G	0/1	'-'	'-'	'-'	'-'	'-'	'-'	'-'
chr1	28434943	A	'-'	'-'	'-'	'-'	'-'	'-'	G	0/1	G	0/1	G	0/1	'-'
chr1	28434953	C	'-'	'-'	'-'	'-'	'-'	'-'	T	0/1	T	0/1	T	0/1	'-'
chr1	28436010	A	T	0/1	T	0/1	T	0/1	'-'	'-'	'-'	'-'	'-'	'-'	'-'
chr1	28438158	T	A	0/1	A	0/1	A	0/1	'-'	'-'	'-'	'-'	'-'	'-'	'-'
chr1	28451133	A	'-'	'-'	'-'	'-'	'-'	'-'	G	0/1	G	0/1	G	0/1	'-'
chr1	284946	A	G	0/1	G	0/1	G	0/1	'-'	'-'	'-'	'-'	'-'	'-'	'-'
chr1	28494913	C	A	0/1	A	0/1	A	0/1	'-'	'-'	'-'	'-'	'-'	'-'	'-'
chr1	28536651	C	'-'	'-'	'-'	'-'	'-'	'-'	T	0/1	T	0/1	T	0/1	'-'
chr1	28544545	T	'-'	'-'	'-'	'-'	'-'	'-'	G	0/1	G	0/1	G	0/1	'-'
chr1	28544566	G	'-'	'-'	'-'	'-'	'-'	'-'	A	0/1	A	0/1	A	0/1	'-'
chr1	28598018	T	A	0/1	A	0/1	A	0/1	'-'	'-'	'-'	'-'	'-'	'-'	'-'
chr1	28617754	T	G	0/1	G	0/1	G	0/1	'-'	'-'	'-'	'-'	'-'	'-'	'-'
chr1	2862348	A	G	0/1	G	0/1	G	0/1	'-'	'-'	'-'	'-'	'-'	'-'	'-'
chr1	28628101	A	G	0/1	G	0/1	G	0/1	'-'	'-'	'-'	'-'	'-'	'-'	'-'
chr1	28628961	G	'-'	'-'	'-'	'-'	'-'	'-'	A	0/1	A	0/1	A	0/1	'-'
chr1	28628973	A	'-'	'-'	'-'	'-'	'-'	'-'	G	0/1	G	0/1	G	0/1	'-'
chr1	28649963	A	'-'	'-'	'-'	'-'	'-'	'-'	T	0/1	T	0/1	T	0/1	'-'
chr1	28650313	T	C	0/1	C	0/1	C	0/1	'-'	'-'	'-'	'-'	'-'	'-'	'-'
chr1	28650314	G	T	0/1	T	0/1	T	0/1	'-'	'-'	'-'	'-'	'-'	'-'	'-'
chr1	28669760	G	'-'	'-'	'-'	'-'	'-'	'-'	A	0/1	A	0/1	A	0/1	'-'
chr1	28670560	G	A	0/1	A	0/1	A	0/1	'-'	'-'	'-'	'-'	'-'	'-'	'-'
chr1	28670561	C	G	0/1	G	0/1	G	0/1	'-'	'-'	'-'	'-'	'-'	'-'	'-'
chr1	28713317	A	T	0/1	T	0/1	T	0/1	'-'	'-'	'-'	'-'	'-'	'-'	'-'
chr1	28715696	A	G	0/1	G	0/1	G	0/1	'-'	'-'	'-'	'-'	'-'	'-'	'-'
chr1	28719064	A	C	0/1	C	0/1	C	0/1	'-'	'-'	'-'	'-'	'-'	'-'	'-'
chr1	28719084	A	G	0/1	G	0/1	G	0/1	G	0/1	G	0/1	G	0/1	'-'
chr1	28745246	T	G	0/1	G	0/1	G	0/1	'-'	'-'	'-'	'-'	'-'	'-'	'-'
chr1	28753456	G	'-'	'-'	'-'	'-'	'-'	'-'	A	0/1	A	0/1	A	0/1	'-'
chr1	2875817	A	'-'	'-'	'-'	'-'	'-'	'-'	T	0/1	T	0/1	T	0/1	'-'
chr1	2880417	T	A	0/1	A	0/1	A	0/1	'-'	'-'	'-'	'-'	'-'	'-'	'-'
chr1	2880425	T	C	0/1	C	0/1	C	0/1	'-'	'-'	'-'	'-'	'-'	'-'	'-'
chr1	2880927	G	T	0/1	T	0/1	T	0/1	'-'	'-'	'-'	'-'	'-'	'-'	'-'
chr1	2918112	C	'-'	'-'	'-'	'-'	'-'	'-'	T	0/1	T	0/1	T	0/1	'-'
chr1	2918137	C	'-'	'-'	'-'	'-'	'-'	'-'	T	0/1	T	0/1	T	0/1	'-'
[truncated: 28,942 more rows]

## Sheet: Supplemental Table S9
Supplemental Table S9 Gene set 3
Gene_ID	Annotation
Cs1g09240	Probable LRR receptor-like serine/threonine-protein kinase At3g47570; LRR receptor-like serine/threonine-protein kinase EFR; Putative receptor-like protein kinase At3g47110; Putative leucine-rich repeat receptor-like serine/threonine-protein kinase At2g24130; Leucine-rich repeat receptor protein kinase EXS; LRR receptor-like serine/threonine-protein kinase GSO1; Leucine-rich repeat receptor-like …
Cs1g09950	Putative ribonuclease H protein At1g65750;Putative uncharacterized protein Sb01g039553 (Fragment)
Cs1g10050	Putative uncharacterized protein F14G11.4
Cs1g10060	Putative uncharacterized protein
Cs1g10410	Putative ribonuclease H protein At1g65750;LINE-type retrotransposon LIb DNA, complete sequence, Insertion at the SCL6 site
Cs1g02065
Cs1g02080	Putative oxidoreductase, short-chain dehydrogenase/reductase family
Cs1g10980	Putative uncharacterized protein
Cs1g11040	Disease resistance protein At4g27190; Probable disease resistance protein At4g27220; Putative disease resistance protein At4g10780;BED finger-nbs-lrr resistance protein (Fragment)
Cs1g11280	Putative uncharacterized protein Sb01g039000;Probable receptor-like protein kinase At2g23200; Receptor-like protein kinase HERK 1; Receptor-like protein kinase THESEUS 1; Receptor-like protein kinase FERONIA; Receptor-like protein kinase ANXUR2; Putative receptor-like protein kinase At5g39000; Probable LRR receptor-like serine/threonine-protein kinase At5g48740; Proline-rich receptor-like protein…
Cs1g11390	Probable disease resistance protein At5g63020; Disease resistance protein RPS5; Putative disease resistance protein At4g10780;Putative disease resistance gene protein (Fragment)
Cs1g11920	Protein kinase domain containing protein, expressed;Receptor-like serine/threonine-protein kinase SD1-7; G-type lectin S-receptor-like serine/threonine-protein kinase At4g03230; G-type lectin S-receptor-like serine/threonine-protein kinase SRK; Putative serine/threonine-protein kinase receptor; Cysteine-rich receptor-like protein kinase 5; Putative cysteine-rich receptor-like protein kinase 23; P…
Cs1g11950
Cs1g12120	Protein FAR1-RELATED SEQUENCE 6; Protein FAR-RED IMPAIRED RESPONSE 1; Protein FAR-RED ELONGATED HYPOCOTYL 3;Putative uncharacterized protein Sb01g001615 (Fragment)
Cs1g12150	LRR and NB-ARC domain-containing disease resistance protein;Probable disease resistance protein At4g14610; Putative disease resistance protein At4g10780; Disease resistance protein RPS5
Cs1g12160	Probable disease resistance protein At5g63020; Putative disease resistance protein At5g05400; Disease resistance protein RPS5;Putative disease resistance gene protein (Fragment)
Cs1g12180	Putative uncharacterized protein Sb03g004125 (Fragment);Putative pentatricopeptide repeat-containing protein At3g15930; Pentatricopeptide repeat-containing protein At1g31430; Pentatricopeptide repeat-containing protein At2g22410, mitochondrial; Pentatricopeptide repeat-containing protein At1g05750, chloroplastic; Putative pentatricopeptide repeat-containing protein At5g59200, chloroplastic
Cs1g12220	Putative uncharacterized protein Sb04g027240
Cs1g12960	Putative uncharacterized protein Sb03g024880
Cs1g13010	LRR and NB-ARC domain-containing disease resistance protein;Probable disease resistance protein At5g63020; Disease resistance protein RPS5; Putative disease resistance protein At1g63350
Cs1g13030	LRR and NB-ARC domain-containing disease resistance protein;Probable disease resistance protein At5g63020; Disease resistance protein RPS5; Putative disease resistance protein At5g05400
Cs1g13430	LRR and NB-ARC domain-containing disease resistance protein;Probable disease resistance protein At5g63020; Disease resistance protein RPS5; Putative disease resistance protein At4g10780
Cs1g13460	LRR and NB-ARC domain-containing disease resistance protein;Probable disease resistance protein At5g63020; Putative disease resistance protein At4g10780; Disease resistance protein RFL1
Cs1g13790	Putative uncharacterized protein AT4g28900
Cs1g13910	Cold-induced wall associated kinase (Fragment);Wall-associated receptor kinase-like 2; Putative wall-associated receptor kinase-like 11; Wall-associated receptor kinase 5; Proline-rich receptor-like protein kinase PERK3; Cysteine-rich receptor-like protein kinase 42; Probable receptor-like protein kinase At4g39110; Putative proline-rich receptor-like protein kinase PERK11; Probable LRR receptor-l…
Cs1g14020	Probable LRR receptor-like serine/threonine-protein kinase At3g47570; LRR receptor-like serine/threonine-protein kinase EFR; Putative receptor-like protein kinase At3g47110; LRR receptor-like serine/threonine-protein kinase FLS2; Leucine-rich repeat receptor-like serine/threonine-protein kinase BAM1; Probable leucine-rich repeat receptor-like protein kinase At5g63930; Leucine-rich repeat receptor…
Cs1g14030	Probable disease resistance protein At5g63020; Disease resistance protein RPS5; Putative disease resistance protein At4g10780;Disease resistance protein; Heat shock protein DnaJ, N-terminal; AAA ATPase
Cs1g14150	Probable LRR receptor-like serine/threonine-protein kinase At3g47570; LRR receptor-like serine/threonine-protein kinase EFR; Putative receptor-like protein kinase At3g47110; LRR receptor-like serine/threonine-protein kinase FLS2; Leucine-rich repeat receptor-like serine/threonine-protein kinase BAM2; Receptor-like protein kinase 2; Probable leucine-rich repeat receptor-like protein kinase At5g639…
Cs1g14220
Cs1g14260	Probable LRR receptor-like serine/threonine-protein kinase At3g47570; LRR receptor-like serine/threonine-protein kinase GSO2; LRR receptor-like serine/threonine-protein kinase EFR; Putative receptor-like protein kinase At3g47110; Leucine-rich repeat receptor protein kinase EXS; Putative leucine-rich repeat receptor-like serine/threonine-protein kinase At2g24130; Probable leucine-rich repeat recep…
Cs1g14550
Cs1g14780
Cs1g14790	Probable LRR receptor-like serine/threonine-protein kinase At3g47570; Putative receptor-like protein kinase At3g47110; LRR receptor-like serine/threonine-protein kinase FLS2; LRR receptor-like serine/threonine-protein kinase EFR; Leucine-rich repeat receptor-like serine/threonine-protein kinase BAM2; Probable leucine-rich repeat receptor-like protein kinase At5g63930; Receptor-like protein kinase…
Cs1g15060	Putative uncharacterized protein
Cs1g15180	Putative uncharacterized protein Sb09g007950;Peroxidase 29; Lignin-forming anionic peroxidase; Putative Peroxidase 48; Cationic peroxidase 1; Peroxidase N
Cs1g16130	Putative leucine-rich repeat receptor-like protein kinase At2g19210; Putative leucine-rich repeat receptor-like serine/threonine-protein kinase At2g19230; Probable LRR receptor-like serine/threonine-protein kinase At1g05700; Probable LRR receptor-like protein kinase At1g51890; Senescence-induced receptor-like serine/threonine-protein kinase; Probable leucine-rich repeat receptor-like protein kina…
Cs1g17140	Probable disease resistance protein RDL6/RF9;Leucine-rich repeat-containing protein 2, lrrc2, putative
Cs1g17520	Apoptosis 1 inhibitor; Apoptosis inhibitor IAP; Baculoviral IAP repeat-containing protein 3; Inhibitor of apoptosis protein; Putative inhibitor of apoptosis;C3HC4 zinc finger containing protein, putative, expressed
Cs1g17630	Ankyrin repeat-containing protein, putative
Cs1g18380	Leucine-rich repeat containing protein, putative;Putative disease resistance protein RGA1; Disease resistance protein RGA2; Probable disease resistance RPP8-like protein 4
Cs1g18880	Putative uncharacterized protein Sb09g018950
Cs1g19000	TMV resistance protein N; Putative disease resistance protein At4g11170; Protein SUPPRESSOR OF npr1-1, CONSTITUTIVE 1; Probable WRKY transcription factor 19; Protein DA1-related 4; Protein PHLOEM PROTEIN 2-LIKE A8; Vesicle-associated protein 1-4; Probable disease resistance protein At4g33300;Putative TIR-NBS-LRR class disease resistance protein
Cs1g19040	Putative uncharacterized protein
Cs1g01140	Leucine-rich repeat containing protein, putative;Putative disease resistance protein RGA3; Disease resistance protein RGA2; Probable disease resistance protein At5g63020
Cs1g19850	ABC transporter G family member 11; ATP-binding cassette sub-family G member 2;ATP-binding cassette transporter, subfamily G, member 28, group WBC protein PpABCG28
Cs1g22350	TIR-NBS-LRR-TIR type disease resistance protein (Fragment);TMV resistance protein N; Protein SUPPRESSOR OF npr1-1, CONSTITUTIVE 1; Putative disease resistance protein At4g11170; Probable WRKY transcription factor 19; Protein DA1-related 4; Protein PHLOEM PROTEIN 2-LIKE A8; Vesicle-associated protein 1-4; Leucine-rich repeat-containing protein 40
Cs1g22710	Pentatricopeptide repeat-containing protein At3g09040, mitochondrial; Pentatricopeptide repeat-containing protein At1g74600, chloroplastic; Pentatricopeptide repeat-containing protein At4g13650; Putative pentatricopeptide repeat-containing protein At5g09950;Putative pentatricopeptide (PPR) repeat-containing protein
Cs1g22970
Cs1g23120	Glycosyl hydrolase family 9 protein, expressed
Cs1g01170	Retrotransposon protein, putative, Ty1-copia sub-class;Retrovirus-related Pol polyprotein from transposon TNT 1-94; Copia protein; Uncharacterized mitochondrial protein AtMg00810; Putative transposon Ty5-1 protein YCL074W
Cs1g03430	Putative uncharacterized protein Sb03g031600
Cs1g24190	DNA-3-methyladenine glycosylase 1;3-methyladenine DNA glycosylase, putative; 31680-30045
Cs1g25140	Putative uncharacterized protein (Fragment)
Cs1g03750	Putative uncharacterized protein (Fragment)
Cs1g04330	Putative uncharacterized protein orf318
Cs1g04600	RNA-binding protein 39; Probable RNA-binding protein 23; Nuclear localization sequence-binding protein; Polyadenylate-binding protein, cytoplasmic and nuclear; CUGBP Elav-like family member 3; Inner nuclear membrane protein Man1; Putative RNA-binding protein rbpB; Putative RNA-binding protein rbpE; Flowering time control protein FCA; 31 kDa ribonucleoprotein, chloroplastic;Chromosome 9 SCAF15033,…
Cs1g05390	Putative uncharacterized protein Sb04g035180;Protein TONSOKU
Cs1g05660	Transposon protein, putative, CACTA, En/Spm sub-class
Cs1g05730	Putative uncharacterized protein (Fragment);Putative disease resistance RPP13-like protein 1; Disease resistance protein RGA2
Cs1g05770	Putative uncharacterized protein Sb08g005220
Cs1g06100	Putative uncharacterized protein Sb06g001780
Cs1g06570	Retrovirus-related Pol polyprotein LINE-1; Uncharacterized mitochondrial protein AtMg00310; LINE-1 reverse transcriptase homolog;Putative non-LTR retroelement reverse transcriptase
Cs1g06600
Cs1g06720	Probable disease resistance protein At4g27220; Disease resistance protein At4g27190; Putative disease resistance protein At1g63350;Disease resistance protein RPM1, putative
Cs1g07050	Uncharacterized mitochondrial protein AtMg00310;Putative non-LTR retroelement reverse transcriptase
Cs1g07160	Disease resistance protein At4g27190; Probable disease resistance protein At4g27220; Putative disease resistance protein At3g15700;Late blight resistance protein R1-A, putative
Cs1g07180	Disease resistance protein At4g27190; Probable disease resistance protein At4g27220; Putative disease resistance protein At5g05400;Late blight resistance protein R1-A, putative
Cs1g07290	LINE-type retrotransposon LIb DNA, complete sequence, Insertion at the S10 site
Cs1g07580	Enzymatic polyprotein;Putative uncharacterized protein OSJNBa0025J22.29
Cs1g07710	Resistance protein RPP8-like protein (Fragment);Probable disease resistance RPP8-like protein 4; Disease resistance protein RPH8A; Putative disease resistance protein At1g59780
Cs1g07860	Probable disease resistance protein RDL6/RF9;Putative CC-NBS-LRR protein
Cs1g07920	Ribosomal protein L11 methyltransferase;Ribosomal protein L11 methyltransferase-like protein
Cs1g08470	Potato DNA for copia-like transposable element
Cs2g13290	Putative RING-H2 finger protein ATL21A; RING-H2 finger protein ATL22; Probable serine/threonine-protein kinase At1g18390;RING/U-box domain-containing protein-like protein
Cs2g13310	Probable receptor-like protein kinase At1g67000; G-type lectin S-receptor-like serine/threonine-protein kinase SD2-5; Probable LRR receptor-like serine/threonine-protein kinase At1g56140; Putative cysteine-rich receptor-like protein kinase 39; Probable L-type lectin-domain containing receptor kinase S.5; Cysteine-rich receptor-like protein kinase 13; Protein NSP-INTERACTING KINASE 3; Putative rec…
Cs2g13740	Putative uncharacterized protein OSJNBb0007E22.22
Cs2g14000
Cs2g14210
Cs2g14310	Very similar to retrotransposon reverse transcriptase;Uncharacterized mitochondrial protein AtMg00310; Putative ribonuclease H protein At1g65750
Cs2g14590	LINE-type retrotransposon LIb DNA, complete sequence, Insertion at the S10 site
Cs2g15000	Pentatricopeptide repeat-containing protein, putative;Pentatricopeptide repeat-containing protein At3g26630, chloroplastic; Pentatricopeptide repeat-containing protein At2g20540; Pentatricopeptide repeat-containing protein At2g22410, mitochondrial; Putative pentatricopeptide repeat-containing protein At5g59200, chloroplastic; Putative pentatricopeptide repeat-containing protein At3g49142; Putativ…
Cs2g15350
Cs2g16060	Putative orcinol O-methyltransferase (Fragment);8-hydroxyquercetin 8-O-methyltransferase; Eugenol O-methyltransferase; Tabersonine 16-O-methyltransferase; Chavicol O-methyltransferase; Myricetin O-methyltransferase; 6a-hydroxymaackiain methyltransferase 1; Isoflavone-7-O-methyltransferase 8; Isoflavone 4'-O-methyltransferase; O-methyltransferase ZRP4; 5-pentadecatrienyl resorcinol O-methyltransfe…
Cs2g16460	Putative uncharacterized protein Sb02g023970
Cs2g17320	Protein FAR1-RELATED SEQUENCE 5; Protein FAR-RED IMPAIRED RESPONSE 1; Protein FAR-RED ELONGATED HYPOCOTYL 3;Putative uncharacterized protein Sb01g001615 (Fragment)
Cs2g17330	Protein FAR1-RELATED SEQUENCE 5; Protein FAR-RED ELONGATED HYPOCOTYL 3; Protein FAR-RED IMPAIRED RESPONSE 1;Putative uncharacterized protein Sb02g002703 (Fragment)
Cs2g17530	Similar to tr|Q3MEB0|Q3MEB0_ANAVT Hypothetical protein
Cs2g18340	Putative uncharacterized protein (Fragment)
Cs2g18470	Disease resistance protein RFL1, putative;Disease resistance protein At4g27190; Probable disease resistance protein At5g63020; Putative disease resistance protein At5g05400
Cs2g18520	Putative uncharacterized protein Sb02g029870;Probable transcription factor PosF21; Transcription factor RF2a
Cs2g20150	Putative uncharacterized protein Sb10g029405 (Fragment)
Cs2g20170	Putative uncharacterized protein
Cs2g20640	Elicitor inducible beta-1,3-glucanase NtEIG-E76;Glucan endo-1,3-beta-glucosidase 3; Probable glucan endo-1,3-beta-glucosidase A6; Glucan endo-1,3-beta-glucosidase GV; Glucan endo-1,3-beta-glucosidase GII; Lichenase; Glucan endo-1,3-beta-glucosidase, basic isoform; Putative glucan endo-1,3-beta-glucosidase GVI (Fragment); Glucan endo-1,3-beta-glucosidase, basic vacuolar isoform; Glucan endo-1,3-be…
Cs2g20800	Putative uncharacterized protein;Transposon Ty3-I Gag-Pol polyprotein; Retrovirus-related Pol polyprotein from transposon 17.6; Retrovirus-related Pol polyprotein from transposon opus; Retrotransposable element Tf2 155 kDa protein type 1; Retrovirus-related Pol polyprotein from transposon gypsy; Polyprotein P3; Enzymatic polyprotein; Genome polyprotein; RNA-directed DNA polymerase homolog
Cs2g21020	Putative uncharacterized protein
Cs2g21410	Putative uncharacterized protein
Cs2g21660	Glucan endo-1,3-beta-glucosidase 11; Probable glucan endo-1,3-beta-glucosidase A6; Glucan endo-1,3-beta-glucosidase, basic isoform; Putative glucan endo-1,3-beta-glucosidase GVI (Fragment); Glucan endo-1,3-beta-glucosidase GV; Glucan endo-1,3-beta-glucosidase (Fragment); Lichenase; Glucan endo-1,3-beta-glucosidase B; Glucan endo-1,3-beta-glucosidase, basic isoform 3 (Fragment); Glucan endo-1,3-be…
Cs2g22440	Putative S-locus lectin protein kinase family protein;G-type lectin S-receptor-like serine/threonine-protein kinase At2g19130; Receptor-like serine/threonine-protein kinase SD1-8; Putative receptor protein kinase ZmPK1; G-type lectin S-receptor-like serine/threonine-protein kinase SRK; Putative inactive G-type lectin S-receptor-like serine/threonine-protein kinase SRK; Probable receptor-like prot…
Cs2g22530	Putative uncharacterized protein
Cs2g22910	Exodeoxyribonuclease III family protein, expressed
Cs2g04320	Probable LRR receptor-like serine/threonine-protein kinase RFK1; Probable leucine-rich repeat receptor-like serine/threonine-protein kinase At3g14840; G-type lectin S-receptor-like serine/threonine-protein kinase At1g61420; Cysteine-rich receptor-like protein kinase 11; Putative G-type lectin S-receptor-like serine/threonine-protein kinase At1g61610; BRASSINOSTEROID INSENSITIVE 1-associated recep…
Cs2g23430	RNA polymerase II subunit 5-mediating protein homolog; Unconventional prefoldin RPB5 interactor;Putative uncharacterized protein (Fragment)
Cs2g24110	(-)-germacrene D synthase; Valencene synthase; (+)-delta-cadinene synthase isozyme A; Pinene synthase; (+)-delta-cadinene synthase isozyme XC14; (+)-delta-cadinene synthase; (E,E)-germacrene B synthase; Beta-caryophyllene synthase; Germacrene C synthase; Vetispiradiene synthase 1; Vetispiradiene synthase 1 (Fragment); (E)-beta-farnesene synthase; Germacrene-D synthase; 5-epi-aristolochene synthas…
Cs2g24170	Early nodulin-like protein 2; Early nodulin-55-2; Blue copper protein; Mavicyanin; Umecyanin; Stellacyanin; Lamin-like protein;Putative early nodulin-like 2 predicted GPI-anchored protein (Fragment)
Cs2g24260
Cs2g24880	Double-strand-break repair protein Rad21-like protein;Sister chromatid cohesion 1 protein 2; Double-strand-break repair protein rad21 homolog; Double-strand-break repair protein rad21-like protein 1; Cohesin subunit rad21
Cs2g25130	Leucine-rich repeat receptor-like protein kinase PXL1; Probable leucine-rich repeat receptor-like protein kinase At1g35710; Probably inactive leucine-rich repeat receptor-like protein kinase At2g25790; LRR receptor-like serine/threonine-protein kinase GSO1; Leucine-rich repeat receptor-like serine/threonine-protein kinase At1g17230; Probable LRR receptor-like serine/threonine-protein kinase At4g3…
Cs2g25350	Putative uncharacterized protein Sb07g026230;Uncharacterized protein yciO; Uncharacterized protein HI_1198
Cs2g25900	Genome polyprotein;Predicted protein
Cs2g26080
Cs2g26400	Putative uncharacterized protein (Fragment);Putative disease resistance RPP13-like protein 1; Disease resistance protein RGA2; Probable disease resistance protein At1g12280
Cs2g26450
Cs2g26460	Putative uncharacterized protein (Fragment);Putative disease resistance RPP13-like protein 1; Disease resistance protein RGA2
Cs2g26480	Putative ribonuclease H protein At1g65750; Uncharacterized mitochondrial protein AtMg00310;Putative non-LTR retroelement reverse transcriptase
Cs2g26580	Putative uncharacterized protein Sb0139s002040 (Fragment)
Cs2g26780	Putative uncharacterized protein Sb03g010340;Geranylgeranyl diphosphate reductase, chloroplastic; Geranylgeranyl diphosphate reductase; Digeranylgeranylglycerophospholipid reductase
Cs2g26870	Putative ribonuclease H protein At1g65750; Transposon TX1 uncharacterized 149 kDa protein;LINE-type retrotransposon LIb DNA, complete sequence, Insertion at the SCL6 site
Cs2g27020	Whole genome shotgun sequence assembly, scaffold_16, strain Mel28;Pentatricopeptide repeat-containing protein At4g35850, mitochondrial; Pre-rRNA-processing protein ESF2; Activator of basal transcription 1; Putative pre-rRNA-processing protein esf2
Cs2g27480
Cs2g27850
Cs2g28670	Alpha-dioxygenase, putative, expressed
Cs2g29520	Calcium-dependent protein kinase, isoform 2, putative, expressed;Calcium-dependent protein kinase 17; Calcium-dependent protein kinase isoform 2; CDPK-related protein kinase; Calcium/calmodulin-dependent serine/threonine-protein kinase 1
Cs2g29830	Probable LRR receptor-like serine/threonine-protein kinase At4g08850; Probable leucine-rich repeat receptor-like protein kinase At1g35710; Leucine-rich repeat receptor-like serine/threonine-protein kinase At1g17230; LRR receptor-like serine/threonine-protein kinase RCH1; Leucine-rich repeat receptor-like protein kinase PXL2; Receptor protein kinase CLAVATA1; Receptor-like protein kinase 2; LRR re…
Cs2g29890	Probable LRR receptor-like serine/threonine-protein kinase At4g08850; Probable leucine-rich repeat receptor-like protein kinase At1g35710; LRR receptor-like serine/threonine-protein kinase ERECTA; LRR receptor-like serine/threonine-protein kinase GSO1; Leucine-rich repeat receptor-like serine/threonine-protein kinase At1g17230; Leucine-rich repeat receptor protein kinase EXS; Receptor-like protei…
Cs2g30040
Cs2g31110	Histone H4; Histone-fold
Cs2g31240	Novel protein similar to human chromodomain helicase DNA binding protein 2 (CHD2) (Fragment);Chromodomain-helicase-DNA-binding protein 2; Chromodomain helicase hrp3; Chromo domain-containing protein 1; CHD3-type chromatin-remodeling factor PICKLE; Chromodomain-helicase-DNA-binding protein 3 homolog; Probable global transcription activator SNF2L1; ISWI chromatin-remodeling complex ATPase ISW2; SWI…
Cs2g06040	Gag-pol polyprotein
Cs2g07130
Cs2g07160	G-type lectin S-receptor-like serine/threonine-protein kinase RKS1; Receptor-like serine/threonine-protein kinase SD1-8; Putative serine/threonine-protein kinase receptor; Putative G-type lectin S-receptor-like serine/threonine-protein kinase At1g61610; G-type lectin S-receptor-like serine/threonine-protein kinase SRK; Cysteine-rich receptor-like protein kinase 10; Putative cysteine-rich receptor…
Cs2g08710	Transposon TX1 uncharacterized 149 kDa protein; Uncharacterized mitochondrial protein AtMg01250;RNA-directed DNA polymerase (Reverse transcriptase)
Cs2g01010	Putative uncharacterized protein OSJNBa0079B05.9;Probable LRR receptor-like serine/threonine-protein kinase At4g08850; Probable leucine-rich repeat receptor-like protein kinase At1g35710; Leucine-rich repeat receptor-like serine/threonine-protein kinase At1g17230; LRR receptor-like serine/threonine-protein kinase RCH1; Receptor protein kinase CLAVATA1; Leucine-rich repeat receptor-like protein ki…
Cs2g08870	Putative uncharacterized protein
Cs2g08880	Retrotransposon protein, putative, Ty3-gypsy sub-class
Cs2g08890	Monosacharide transport protein
Cs2g08920	Serine/threonine-protein kinase BRI1-like 2; Receptor-like protein kinase 2; LRR receptor-like serine/threonine-protein kinase FLS2; Leucine-rich repeat receptor protein kinase EXS; Probable leucine-rich repeat receptor-like protein kinase At2g33170; Systemin receptor SR160; Brassinosteroid LRR receptor kinase; Probable LRR receptor-like serine/threonine-protein kinase At4g36180; Receptor-like pr…
Cs2g09230	Putative uncharacterized protein OSJNBa0025J22.29
Cs2g09350	Structure-specific endonuclease subunit SLX1; Structure-specific endonuclease subunit SLX1 homolog;Whole genome shotgun assembly, allelic scaffold set, scaffold scaffoldA_844
Cs2g10470	Protein prune homolog;Chromosome undetermined SCAF7304, whole genome shotgun sequence
Cs2g10760	Protein argonaute 2; Protein argonaute-2; Protein argonaute-2 (Fragment); Putative protein tag-76;Eukaryotic translation initiation factor 2c, putative
Cs2g11000	Leucine-rich repeat containing protein, putative;TMV resistance protein N; Putative disease resistance protein At4g11170; Protein SUPPRESSOR OF npr1-1, CONSTITUTIVE 1; Protein PHLOEM PROTEIN 2-LIKE A8; Vesicle-associated protein 1-4
Cs2g11220	Receptor-like protein 12; LRR receptor-like serine/threonine-protein kinase GSO1; Probable leucine-rich repeat receptor-like protein kinase At5g63930; Probable LRR receptor-like serine/threonine-protein kinase At4g08850; Leucine-rich repeat receptor-like protein kinase PEPR2; Leucine-rich repeat receptor-like serine/threonine-protein kinase BAM2; Receptor-like protein kinase HSL1; Leucine-rich re…
Cs2g13280	Putative uncharacterized protein Sb03g008110;Probable receptor-like protein kinase At1g67000; G-type lectin S-receptor-like serine/threonine-protein kinase SD2-5; Probable LRR receptor-like serine/threonine-protein kinase At1g56140; Receptor-like serine/threonine-protein kinase SD1-7; Putative cysteine-rich receptor-like protein kinase 39; Protein NSP-INTERACTING KINASE 3; Cysteine-rich receptor-…
Cs3g07880	Plastid 1,8-cineol synthase (Precursor);Myrcene synthase, chloroplastic; (+)-alpha-pinene synthase, chloroplastic; (-)-limonene synthase, chloroplastic; 1,8-cineole synthase, chloroplastic; Beta-myrcene/(E)-beta-ocimene synthase 2, chloroplastic; (+)-sabinene synthase, chloroplastic; Alpha-zingiberene synthase; (R)-limonene synthase 1; R-linalool synthase QH1, chloroplastic (Fragment); Beta-myrce…
Cs3g07940	Probable disease resistance protein At4g27220; Putative disease resistance protein At3g15700;Disease resistance protein RFL1, putative
Cs3g01850	Retrotransposon protein, putative, Ty3-gypsy subclass;Transposon Ty3-G Gag-Pol polyprotein
Cs3g08040	Disease resistance protein At4g27190; Probable disease resistance protein At4g27220; Putative disease resistance protein At3g15700;Disease resistance protein RFL1, putative
Cs3g08110	Probable disease resistance protein At1g52660; Putative disease resistance protein At3g15700;Disease resistance protein RFL1, putative
Cs3g08450	UDP-glycosyltransferase 83A1; Hydroquinone glucosyltransferase; Cinnamate beta-D-glucosyltransferase;Putative uncharacterized protein Sb01g007610
Cs3g08550	Calcium-transporting ATPase 12, plasma membrane-type; Putative calcium-transporting ATPase 13, plasma membrane-type; Probable calcium-transporting ATPase 5, plasma membrane-type; Calcium-transporting ATPase 1, chloroplastic; Calcium-transporting ATPase PAT1; Plasma membrane calcium-transporting ATPase 2; Plasma membrane calcium-transporting ATPase 2 (Fragment); Probable calcium-transporting ATPas…
Cs3g08620	Nucleoporin autopeptidase family protein, expressed
Cs3g09090	Cytochrome P450 82C4; Cytochrome P450 82A1 (Fragment); Flavonoid 3'-monooxygenase; Isoflavone 2'-hydroxylase; Psoralen synthase (Fragment); Psoralen synthase; Beta-amyrin 24-hydroxylase; Germacrene A oxidase; Angelicin synthase (Fragment);(S)-N-methylcoclaurine 3'-hydroxylase
Cs3g09160	Putative uncharacterized protein
Cs3g09210	Nicastrin;Putative uncharacterized protein (Fragment)
Cs3g01950
Cs3g09430	Putative uncharacterized protein At2g35480
Cs3g09770	Alpha-glucosidase, family 31 of glycosyl hydrolase;Alpha-glucosidase 2; Neutral alpha-glucosidase AB; Neutral alpha-glucosidase C; Lysosomal alpha-glucosidase; Neutral alpha-glucosidase C (Fragment); Probable alpha-glucosidase Os06g0675700; Glucosidase 2 subunit alpha; Maltase-glucoamylase, intestinal; Sucrase-isomaltase, intestinal; Alpha-xylosidase; Uncharacterized family 31 glucosidase C30D11.…
Cs3g10050	LRR receptor-like serine/threonine-protein kinase GSO2; Brassinosteroid LRR receptor kinase; Systemin receptor SR160; Leucine-rich repeat receptor protein kinase EXS; Receptor-like protein kinase BRI1-like 3; Probable LRR receptor-like serine/threonine-protein kinase At4g36180; Leucine-rich repeat receptor-like protein kinase PEPR2; Probable leucine-rich repeat receptor-like protein kinase At1g35…
Cs3g10140	LRR receptor-like serine/threonine-protein kinase GSO2; Putative leucine-rich repeat receptor-like serine/threonine-protein kinase At2g24130; Receptor-like protein kinase BRI1-like 3; Leucine-rich repeat receptor-like serine/threonine-protein kinase BAM3; LRR receptor-like serine/threonine-protein kinase ERECTA; Probable LRR receptor-like serine/threonine-protein kinase At1g12460; Leucine-rich re…
Cs3g10370
Cs3g11010	Importin subunit alpha-1a; Importin subunit alpha; Importin subunit alpha-B; Zeta-carotene desaturase, chloroplastic/chromoplastic; Probable importin subunit alpha-A; Zeta-carotene desaturase; Probable zeta-carotene desaturase; Disease resistance protein At4g27190; Probable disease resistance protein At4g27220;Putative uncharacterized protein Sb09g004320
Cs3g11050	Putative uncharacterized protein Sb09g004320;Importin subunit alpha-1a; Importin subunit alpha; Importin subunit alpha-B; Probable disease resistance protein At4g27220; Probable importin subunit alpha-A
Cs3g11120	Disease resistance protein At4g27190; Probable disease resistance protein At4g27220;Disease resistance protein RFL1, putative
Cs3g11140	Importin subunit alpha-1a; Importin subunit alpha; Importin subunit alpha-B; Probable importin subunit alpha-A; Probable disease resistance protein At4g27220; Sperm-associated antigen 6;Putative uncharacterized protein Sb09g004320
Cs3g11150	Disease resistance protein At4g27190; Probable disease resistance protein At4g27220; Putative disease resistance protein At5g05400; Putative late blight resistance protein homolog R1B-13;Disease resistance protein RFL1, putative
Cs3g11180	Zeta-carotene desaturase, chloroplastic/chromoplastic; Zeta-carotene desaturase; Probable zeta-carotene desaturase; Phytoene dehydrogenase, chloroplastic/chromoplastic; 15-cis-phytoene desaturase, chloroplastic/chromoplastic; 15-cis-phytoene desaturase; Phytoene dehydrogenase;Zeta-carotene desaturase, chloroplast, putative
Cs3g11190	Putative uncharacterized protein Sb09g004320;Importin subunit alpha-1a; Importin subunit alpha; Importin subunit alpha-B; Probable importin subunit alpha-A
Cs3g11230	Disease resistance protein RFL1, putative
Cs3g11250	Importin subunit alpha-1b; Importin subunit alpha; Importin subunit alpha-B; Probable importin subunit alpha-A; Importin subunit alpha-2-like protein;Putative uncharacterized protein Sb09g004320
Cs3g11320	DNA-damage-repair/toleration protein DRT102; Ribose-5-phosphate isomerase B; Galactose-6-phosphate isomerase subunit lacB; Probable ribose-5-phosphate isomerase B;Uracil phosphoribosyltransferase (Ump pyrophosphorylase)(Uprtase)
Cs3g11750	Eukaryotic aspartyl protease family protein, expressed;Aspartic proteinase nepenthesin-1
Cs3g11770	Cysteine-rich receptor-like protein kinase 25; Putative cysteine-rich receptor-like protein kinase 20; G-type lectin S-receptor-like serine/threonine-protein kinase B120; Receptor-like serine/threonine-protein kinase SD1-7; Putative G-type lectin S-receptor-like serine/threonine-protein kinase At1g61610; Putative serine/threonine-protein kinase receptor; G-type lectin S-receptor-like serine/threo…
Cs3g12370	Cysteine-rich receptor-like protein kinase 10; Putative cysteine-rich receptor-like protein kinase 20; G-type lectin S-receptor-like serine/threonine-protein kinase B120; Putative G-type lectin S-receptor-like serine/threonine-protein kinase At1g61610; Receptor-like serine/threonine-protein kinase SD1-6; Putative serine/threonine-protein kinase receptor;Putative cysteine-rich receptor-like protei…
Cs3g12420	Sugar transporter ERD6-like 17; Putative sugar transporter ERD6-like 13;General substrate transporter; Sugar transporter superfamily
Cs3g12440	Serine/threonine-protein kinase PBS1, putative;Cysteine-rich receptor-like protein kinase 19; G-type lectin S-receptor-like serine/threonine-protein kinase B120; Putative cysteine-rich receptor-like protein kinase 33; Receptor-like serine/threonine-protein kinase SD1-6; Putative G-type lectin S-receptor-like serine/threonine-protein kinase At1g61610; Putative serine/threonine-protein kinase recep…
Cs3g12700	Disease resistance protein At4g27190; Probable disease resistance protein At4g27220; Putative disease resistance protein At3g15700;Disease resistance protein RFL1, putative
Cs3g12710	Probable disease resistance protein At4g27220; Putative disease resistance protein At3g15700;Disease resistance protein RFL1, putative
Cs3g12750	Protein BONZAI 3; Copine-3; Copine-2; Copine-8; Copine-1; Copine-9; Copine-5; Copine-7; Copine-4; Copine-A; Copine-6; Nicotinic receptor-associated protein 1; Copine-B; Copine-E;DCD (Development and Cell Death) domain-containing protein
Cs3g12810	Disease resistance protein RPS5; Probable disease resistance protein At5g63020; Putative disease resistance protein At5g05400;Disease resistance protein RFL1, putative
Cs3g12890	RNA-directed DNA polymerase (Reverse transcriptase); Ribonuclease H;Uncharacterized mitochondrial protein AtMg01250; Retrovirus-related Pol polyprotein from type-1 retrotransposable element R2 (Fragment)
Cs3g13020	Protein lin-54 homolog; Protein lin-54; Tesmin;Tesmin/TSO1-like CXC domain containing protein, expressed
Cs3g13200	Probable disease resistance protein At1g61300; Putative disease resistance protein At5g05400;Disease resistance protein RFL1, putative
Cs3g01010	Retrotransposon protein, putative, unclassified
Cs3g13320	Leucine-rich repeat containing protein, putative;Putative disease resistance protein RGA4; Disease resistance protein RGA2; Probable disease resistance RPP8-like protein 4
Cs3g13410	Serine/threonine-protein kinase PBS1; Receptor-like serine/threonine-protein kinase ALE2; Probable serine/threonine-protein kinase RLCKVII; Proline-rich receptor-like protein kinase PERK8; Probable receptor-like protein kinase At5g15080; Putative proline-rich receptor-like protein kinase PERK11; Probable serine/threonine-protein kinase NAK; Protein kinase APK1B, chloroplastic; Probable receptor-l…
Cs3g13710	Disease resistance protein RGA2; Putative disease resistance protein RGA3; Probable disease resistance RPP8-like protein 4;Leucine-rich repeat containing protein, putative
Cs3g13720	Glycogenin-2; Glycogenin-1;Secondary cell wall-related glycosyltransferase family 8
Cs3g13990	Putative wall-associated receptor kinase-like 16; Wall-associated receptor kinase 3; Wall-associated receptor kinase-like 2; Probable inactive receptor-like protein kinase At1g65250; Inactive serine/threonine-protein kinase At1g67470; Probable receptor-like protein kinase At2g42960; Serine/threonine-protein kinase At3g07070; Protein kinase APK1A, chloroplastic; Proline-rich receptor-like protein …
Cs3g14370	Putative non-LTR retroelement reverse transcriptase;Uncharacterized mitochondrial protein AtMg01250
Cs3g14580	Alpha/beta-hydrolase domain-containing protein;Epoxide hydrolase 2; AB hydrolase superfamily protein yfhM; Soluble epoxide hydrolase; Haloacetate dehalogenase H-1; Haloalkane dehalogenase; Probable oxidoreductase ephD; Fluoroacetate dehalogenase; Dihydrolipoyllysine-residue acetyltransferase component of acetoin cleaving system; Uncharacterized hydrolase YNR064C; Putative non-heme chloroperoxidas…
Cs3g15930
Cs3g16470	Glycosyl hydrolase family 10 protein / carbohydrate-binding domain-containing protein;Endo-1,4-beta-xylanase; Probable endo-1,4-beta-xylanase C; Endo-1,4-beta-xylanase A
Cs3g16510
Cs3g02390	Transposon protein, putative, mutator sub-class (Fragment)
Cs3g18020	Retrotransposon protein, putative, unclassified, expressed;Putative ribonuclease H protein At1g65750; Uncharacterized mitochondrial protein AtMg00310
Cs3g18100	UDP-glycosyltransferase 85A2; Cyanohydrin beta-glucosyltransferase;Transcription factor/ transferase, transferring glycosyl groups
Cs3g18530
Cs3g02480	TPR and ankyrin repeat-containing protein 1; Helicase SEN1; Uncharacterized ATP-dependent helicase C29A10.10c; Probable helicase DDB_G0274399; ATP-dependent helicase NAM7; Regulator of nonsense transcripts 1 homolog; Regulator of nonsense transcripts 1; Putative regulator of nonsense transcripts 1; Probable helicase senataxin; DNA polymerase alpha-associated DNA helicase A; Uncharacterized protei…
Cs3g18850	HAT family dimerisation domain containing protein, expressed;Putative AC9 transposase; Putative AC transposase
Cs3g19170	Biotin holocarboxylase synthetase ref|NP_565605.1| holocarboxylase synthetase (ISS);Biotin--protein ligase; Bifunctional protein BirA; Bifunctional enzyme BirA/CoaX
Cs3g20810	Alcohol dehydrogenase; Alcohol dehydrogenase class-P; Alcohol dehydrogenase 1 (Fragment); Alcohol dehydrogenase-like 6; Alcohol dehydrogenase class-3 chain L; Alcohol dehydrogenase class-3 chain H; Alcohol dehydrogenase E chain; Alcohol dehydrogenase S chain;ADH-like UDP-glucose dehydrogenase
Cs3g21170
Cs3g24670	Putative uncharacterized protein Sb03g044353 (Fragment);PERQ amino acid-rich with GYF domain-containing protein 2
Cs3g01260	Putative methyltransferase domain-containing protein
Cs3g03020	Putative uncharacterized protein (Fragment);Putative disease resistance RPP13-like protein 1; Disease resistance protein RGA2; Probable disease resistance protein At1g58390
Cs3g03030	Putative uncharacterized protein Sb03g025350;Ras-related protein RABD1; GTP-binding protein YPTM2; Putative Ras-related protein Rab-1C; Ras-like GTP-binding protein YPT1
Cs3g01290	Putative disease resistance protein At3g14460;Putative uncharacterized protein (Fragment)
Cs3g03380	Putative uncharacterized protein (Fragment);Retrovirus-related Pol polyprotein from transposon opus; Retrovirus-related Pol polyprotein from transposon 297; Retrotransposable element Tf2 155 kDa protein type 1; Retrovirus-related Pol polyprotein from transposon gypsy; Uncharacterized mitochondrial protein AtMg00860; Pol polyprotein; Pol polyprotein (Fragment); Gag-Pol polyprotein; Transposon Ty3-…
Cs3g03520	Cytosine-specific methyltransferase (Fragment);DNA (cytosine-5)-methyltransferase 1A
Cs3g03570	Putative uncharacterized protein (Fragment);Putative disease resistance RPP13-like protein 1; Disease resistance protein RGA2; Probable disease resistance protein At5g43730
Cs3g03790	Potassium channel AKT2/3; Probable potassium channel AKT5; Potassium channel GORK; Potassium channel SKOR; Putative potassium channel KAT5;Pulvinus inward-rectifying channel for potassium SPICK1
Cs3g04080	Putative uncharacterized protein (Fragment)
Cs3g04160	Pentatricopeptide repeat-containing protein At1g10910, chloroplastic; Pentatricopeptide repeat-containing protein At1g64580;Pentatricopeptide repeat-containing protein, putative
Cs3g04170	(R)-limonene synthase 1; Myrcene synthase, chloroplastic; (+)-alpha-pinene synthase, chloroplastic; (-)-limonene synthase, chloroplastic; Alpha-zingiberene synthase; Beta-myrcene synthase, chloroplastic; 1,8-cineole synthase, chloroplastic; Isoprene synthase, chloroplastic; Terpinolene synthase, chloroplastic; Beta-myrcene/(E)-beta-ocimene synthase 2, chloroplastic; (E)-beta-ocimene synthase, chl…
Cs3g04910	Putative disease resistance protein At3g15700; Probable disease resistance protein At1g52660;Disease resistance protein RFL1, putative
Cs3g05010	Retrovirus-related Pol polyprotein from transposon TNT 1-94; Copia protein; Uncharacterized mitochondrial protein AtMg00820;Retrotransposon protein, putative, Ty1-copia sub-class
Cs3g05160	Serine/threonine-specific protein kinase like protein;Wall-associated receptor kinase-like 2; Putative wall-associated receptor kinase-like 11; Wall-associated receptor kinase 5; Probable receptor-like protein kinase At4g39110; Receptor-like protein kinase ANXUR2; Probable LRR receptor-like serine/threonine-protein kinase At1g06840; Receptor-like protein kinase THESEUS 1; Proline-rich receptor-li…
Cs3g05170	Putative uncharacterized protein Sb03g036370;L-type lectin-domain containing receptor kinase IX.1; Probable L-type lectin-domain containing receptor kinase S.7; Putative L-type lectin-domain containing receptor kinase V.2; Lectin-domain containing receptor kinase VI.3; Probable LRR receptor-like serine/threonine-protein kinase At1g56140; Cysteine-rich receptor-like protein kinase 4; G-type lectin…
Cs3g05190	Cold-induced wall associated kinase (Fragment);Wall-associated receptor kinase-like 1; Putative wall-associated receptor kinase-like 11; Wall-associated receptor kinase 4; Probable LRR receptor-like serine/threonine-protein kinase At1g06840; Probable receptor-like protein kinase At2g21480; Proline-rich receptor-like protein kinase PERK3; Probable serine/threonine-protein kinase At1g18390; Recepto…
Cs3g01570	AUX/IAA protein; Transcriptional factor B3; Auxin response factor;Auxin response factor 1; Putative auxin response factor 14
Cs3g05420	Putative uncharacterized protein Sb01g041470
Cs3g05540	Transposon protein, putative, CACTA, En/Spm sub-class
Cs3g05770	TMV resistance protein N; Putative disease resistance protein At4g11170; Protein SUPPRESSOR OF npr1-1, CONSTITUTIVE 1; Probable WRKY transcription factor 19; Protein PHLOEM PROTEIN 2-LIKE A8; Probable disease resistance protein At4g27220; Vesicle-associated protein 1-4;TIR-NBS-LRR-TIR type disease resistance protein (Fragment)
Cs3g05790	RNA-directed DNA polymerase (Reverse transcriptase); Polynucleotidyl transferase, Ribonuclease H fold
Cs3g05890	Disease resistance RPP8-like protein 3; Probable disease resistance RPP8-like protein 2; Putative disease resistance protein At1g58400; Disease susceptibility protein LOV1; Inactive disease susceptibility protein LOV1;Disease resistance protein RPM1, putative
Cs3g05930	Disease resistance RPP8-like protein 3; Probable disease resistance RPP8-like protein 4; Putative disease resistance protein At1g59780;Putative disease resistance RPP8-like protein 2
Cs3g06000	Putative uncharacterized protein Sb04g008547 (Fragment)
Cs3g06230	Leucine-rich repeat; Leucine-rich repeat, cysteine-containing type;Receptor-like protein 12; LRR receptor-like serine/threonine-protein kinase GSO1; Leucine-rich repeat receptor protein kinase EXS; Probable leucine-rich repeat receptor-like protein kinase At1g35710; Leucine-rich repeat receptor-like protein kinase PEPR2; Probable LRR receptor-like serine/threonine-protein kinase At4g36180; Brassi…
Cs3g06450
Cs3g06470	Protein ZINC INDUCED FACILITATOR-LIKE 1; Protein ZINC INDUCED FACILITATOR 1; Probable peptide/nitrate transporter At3g43790;Major facilitator superfamily antiporter, putative, expressed
Cs3g06480	Probable disease resistance protein At1g61300;Disease resistance protein RFL1, putative
Cs3g06500	Probable disease resistance protein At1g61180; Disease resistance protein RPS2;Disease resistance protein RFL1, putative
Cs3g06510
Cs3g06590	Disease resistance protein RPS2; Probable disease resistance protein At1g61300;Disease resistance protein RFL1, putative
Cs3g06610	NBS-LRR resistance-like protein RGC23 (Fragment)
Cs3g01710
Cs3g01730	Protein FAR1-RELATED SEQUENCE 5; Protein FAR-RED IMPAIRED RESPONSE 1;Putative uncharacterized protein Sb01g016055 (Fragment)
Cs3g06810
Cs3g06990	Putative uncharacterized protein (Fragment)
Cs4g14110	Retrotransposon protein, putative, Ty1-copia sub-class;Retrovirus-related Pol polyprotein from transposon TNT 1-94; Copia protein; Uncharacterized mitochondrial protein AtMg00810
Cs4g14210	Receptor-like serine/threonine-protein kinase ALE2; Proline-rich receptor-like protein kinase PERK9; Putative proline-rich receptor-like protein kinase PERK11; Serine/threonine-protein kinase PBS1; Probable serine/threonine-protein kinase NAK; Probable serine/threonine-protein kinase RLCKVII; Protein kinase APK1B, chloroplastic; Probable receptor-like protein kinase At5g15080; Probable serine/thr…
Cs4g14750	Retrotransposable element Tf2 155 kDa protein type 3; Transposon Ty3-G Gag-Pol polyprotein; Pro-Pol polyprotein; Uncharacterized mitochondrial protein AtMg00860; Retrovirus-related Pol polyprotein from transposon 297; Retrovirus-related Pol polyprotein from transposon opus;RNA-directed DNA polymerase (Reverse transcriptase); Chromo; Zinc finger, CCHC-type; Peptidase aspartic, active site; Polynuc…
Cs4g16150	Retrovirus-related Pol polyprotein from transposon TNT 1-94; Copia protein; Transposon Ty4-H Gag-Pol polyprotein; Putative transposon Ty5-1 protein YCL074W;Integrase, catalytic region; Zinc finger, CCHC-type; Peptidase aspartic, catalytic
Cs4g03090	NAC domain-containing protein 29; Protein ATAF2; Putative NAC domain-containing protein 94; Protein FEZ; Protein CUP-SHAPED COTYLEDON 1; Protein SOMBRERO;Putative uncharacterized protein (Fragment)
Cs4g16440	Leucine-rich repeat receptor protein kinase exs, putative;Receptor-like protein 12; LRR receptor-like serine/threonine-protein kinase FLS2; Leucine-rich repeat receptor-like serine/threonine-protein kinase At1g17230; Probable LRR receptor-like serine/threonine-protein kinase At4g36180; Probable leucine-rich repeat receptor-like protein kinase At5g63930; Serine/threonine-protein kinase BRI1-like 2…
Cs4g16940
Cs4g17660	Uncharacterized mitochondrial protein AtMg00310;Putative uncharacterized protein Sb05g019526 (Fragment)
Cs4g18540	Probable L-type lectin-domain containing receptor kinase S.5; Lectin 1; Seed lectin; Seed lectin subunit I; Erythroagglutinating phytohemagglutinin; Leucoagglutinating phytohemagglutinin; Favin; Bark agglutinin I polypeptide B; L-type lectin-domain containing receptor kinase VIII.2; Anti-H(O) lectin 1; 2-acetamido-2-deoxy-D-galactose-binding seed lectin 2; Basic agglutinin; Galactose-binding lect…
Cs4g18610	Histone deacetylase family RPD3/HDA1 class III (Fragment);Histone deacetylase 2; Uncharacterized mitochondrial protein AtMg00310
Cs4g19170
Cs4g03610	Putative uncharacterized protein Sb08g020980;NET1-associated nuclear protein 1
Cs4g01260	F-box family protein
Cs4g20560	FAD/NAD(P)-binding oxidoreductase family protein
Cs4g03840	Putative uncharacterized protein OSJNBa0033B09.11
Cs4g04640	Squalene monooxygenase; Probable squalene monooxygenase;Putative uncharacterized protein Sb01g042050
Cs4g05030	Octicosapeptide/Phox/Bem1p and tetratricopeptide repeat domain-containing protein;Tetratricopeptide repeat protein 1; Protein unc-45 homolog B; Protein unc-45 homolog A; Sperm-associated antigen 1; Mitochondrial import receptor subunit TOM34
Cs4g08110	Disease resistance protein RPM1; Putative disease resistance RPP13-like protein 3; Putative late blight resistance protein homolog R1C-3;Leucine-rich repeat-containing protein 2, lrrc2, putative
Cs4g08830	Putative uncharacterized protein;Retrovirus-related Pol polyprotein from transposon 17.6; Retrovirus-related Pol polyprotein from transposon opus; Transposon Ty3-I Gag-Pol polyprotein; Retrovirus-related Pol polyprotein from transposon gypsy; Retrotransposable element Tf2 155 kDa protein type 1; Uncharacterized mitochondrial protein AtMg00860; RNA-directed DNA polymerase homolog
Cs4g09230
Cs4g10240	Geranylgeranyl pyrophosphate synthase, chloroplastic; Geranylgeranyl pyrophosphate synthase 7, chloroplastic; Geranylgeranyl pyrophosphate synthase-related protein, chloroplastic; Geranylgeranyl pyrophosphate synthase 4; Geranylgeranyl pyrophosphate synthase, chloroplastic/chromoplastic; Geranylgeranyl pyrophosphate synthase 6, mitochondrial; Putative geranylgeranyl pyrophosphate synthase 8, chlo…
Cs4g10340	Ankyrin repeat-containing protein, putative;Ankyrin repeat-containing protein At5g02620; Receptor-interacting serine/threonine-protein kinase 4; Ankyrin repeat, PH and SEC7 domain containing protein secG; Transient receptor potential cation channel subfamily A member 1; Caskin-1; Delta-latroinsectotoxin-Lt1a; Serine/threonine-protein phosphatase 6 regulatory ankyrin repeat subunit A; Histone-lysi…
Cs4g10510	Calcium-dependent calmodulin-independent protein kinase isoform 1;Calcium-dependent protein kinase 33; Calcium-dependent protein kinase isoform 2; Calcium/calmodulin-dependent serine/threonine-protein kinase 1; CDPK-related protein kinase
Cs4g10650	Aminotransferase-like, plant mobile domain family protein
Cs4g11500	S-locus-specific glycoprotein S13, putative;G-type lectin S-receptor-like serine/threonine-protein kinase RKS1; Receptor-like serine/threonine-protein kinase SD1-8; Putative serine/threonine-protein kinase receptor; G-type lectin S-receptor-like serine/threonine-protein kinase SRK; Putative G-type lectin S-receptor-like serine/threonine-protein kinase At1g61610; Cysteine-rich receptor-like protei…
Cs4g11540	Transposon protein, putative, CACTA, En/Spm sub-class, expressed
Cs4g11720	Monosacharide transport protein
Cs4g11840
Cs4g12010	Putative uncharacterized protein Sb04g017843 (Fragment)
Cs4g12080	(-)-germacrene D synthase; Valencene synthase; (E)-beta-farnesene synthase; (+)-delta-cadinene synthase isozyme C2; (+)-delta-cadinene synthase isozyme A; (+)-delta-cadinene synthase; (E,E)-germacrene B synthase; Beta-caryophyllene synthase; Vetispiradiene synthase 1; Germacrene C synthase; Pinene synthase; 5-epi-aristolochene synthase; Germacrene-D synthase; Probable 5-epi-aristolochene synthase…
Cs4g12370	Putative uncharacterized protein
Cs4g12400	(E)-beta-farnesene synthase; (-)-germacrene D synthase; (+)-delta-cadinene synthase isozyme A; Valencene synthase; (+)-delta-cadinene synthase isozyme XC14; (+)-delta-cadinene synthase; (E,E)-germacrene B synthase; Germacrene C synthase; Pinene synthase; Vetispiradiene synthase 1; 5-epi-aristolochene synthase 3; Beta-caryophyllene synthase; 5-epiaristolochene synthase; Probable 5-epi-aristolochen…
Cs4g12900	Putative AC transposase; Putative AC9 transposase;HAT family dimerisation domain containing protein
Cs5g13040	Cytochrome P450 72C1; Secologanin synthase; Cytokinin hydroxylase;Cytochrome P450, family 72, subfamily A, polypeptide 10
Cs5g02390	Atypical receptor-like kinase MARK, putative, expressed;Probable inactive receptor kinase RLK902; Probable LRR receptor-like serine/threonine-protein kinase At4g31250; Putative receptor-like protein kinase At1g80870
Cs5g13840
Cs5g14510	Gag-pol polyprotein
Cs5g14530	Contains similarity to RNA-binding protein from Arabidopsis thaliana gi|2129727 and contains RNA recognition PF|00076 domain
Cs5g02700	Origin recognition complex subunit 1-like protein (ISS)
Cs5g14650
Cs5g14980	Secologanin synthase; Cytochrome P450 72C1; Cytokinin hydroxylase;Cytochrome P450, family 72, subfamily A, polypeptide 10
Cs5g15250
Cs5g15330	Kinesin-4; Kinesin-like protein KIFC3; Kinesin-3; Kinesin-2; Kinesin-1; Kinesin-related protein 2; Kinesin-like calmodulin-binding protein; Kinesin-like protein klpA; Kinesin-II 85 kDa subunit; Carboxy-terminal kinesin 2; Kinesin-like calmodulin-binding protein homolog; Protein claret segregational; Kinesin heavy chain; Kinesin-1 heavy chain;Di-glucose binding protein with Kinesin motor domain
Cs5g15570	Putative uncharacterized protein
Cs5g15610	Putative uncharacterized protein;Transposon Ty3-I Gag-Pol polyprotein; Retrovirus-related Pol polyprotein from transposon 17.6; Retrovirus-related Pol polyprotein from transposon gypsy; Retrovirus-related Pol polyprotein from transposon opus; RNA-directed DNA polymerase homolog; Polyprotein P3; Putative enzymatic polyprotein; Enzymatic polyprotein
Cs5g15620	Naringenin,2-oxoglutarate 3-dioxygenase (Fragment); Naringenin,2-oxoglutarate 3-dioxygenase; Flavanone 3-dioxygenase; Flavone synthase; Uncharacterized mitochondrial protein AtMg00310; Thebaine 6-O-demethylase; 1-aminocyclopropane-1-carboxylate oxidase homolog 5; Probable 2-oxoglutarate/Fe(II)-dependent dioxygenase; Gibberellin 3-beta-dioxygenase 1; Gibberellin 20 oxidase 2; 1-aminocyclopropane-1…
Cs5g16090	Putative uncharacterized protein (Fragment)
Cs5g16110	L-type lectin-domain containing receptor kinase VIII.2; Probable L-type lectin-domain containing receptor kinase S.7; Lectin; Anti-H(O) lectin 1; Lectin beta-1 and beta-2 chains; Lectin-4;Serine-threonine protein kinase, plant-type, putative
Cs5g16210	Retrotransposon protein, putative, unclassified, expressed
Cs5g16300	Retrotransposon protein, putative, Ty3-gypsy sub-class
Cs5g16410	Uncharacterized mitochondrial protein AtMg00310;Putative uncharacterized protein Sb05g019526 (Fragment)
Cs5g16560	Protein FAR-RED IMPAIRED RESPONSE 1; Protein FAR1-RELATED SEQUENCE 5;Putative uncharacterized protein Sb02g007217 (Fragment)
Cs5g16570	Putative uncharacterized protein Sb01g032035 (Fragment)
Cs5g16580	Putative uncharacterized protein OJ1740_D06.35
Cs5g16630	Putative uncharacterized protein;Genome polyprotein; Movement protein
Cs5g16670	Putative uncharacterized protein;Genome polyprotein
Cs5g16750	Putative uncharacterized protein Sb09g008991 (Fragment);Genome polyprotein; Enzymatic polyprotein; Polyprotein P3
Cs5g16820	Cytokinin riboside 5'-monophosphate phosphoribohydrolase LOG7; Probable cytokinin riboside 5'-monophosphate phosphoribohydrolase LOGL2; Cytokinin riboside 5'-monophosphate phosphoribohydrolase LOG; LOG family protein PA4923; LOG family protein ORF6 in fasciation locus;Cytokinin riboside 5'-monophosphate phosphoribohydrolase LOG3
Cs5g16870
Cs5g16900	Putative uncharacterized protein
Cs5g17050	Putative uncharacterized protein Sb04g017843 (Fragment)
Cs5g17420	Putative uncharacterized protein;Retrovirus-related Pol polyprotein from transposon 17.6; Retrovirus-related Pol polyprotein from transposon opus; Transposon Ty3-I Gag-Pol polyprotein; Retrovirus-related Pol polyprotein from transposon gypsy; Retrotransposable element Tf2 155 kDa protein type 1; RNA-directed DNA polymerase homolog
Cs5g17750	AIG1-like protein, 5' partial; 1-1205 (Fragment);Protein AIG1; Putative protein PHLOEM PROTEIN 2-LIKE A3; GTPase IMAP family member 4
Cs5g17820	Agamous-like MADS-box protein AGL11; Floral homeotic protein AGAMOUS; MADS-box transcription factor 3; MADS-box protein SOC1; Agamous-like MADS-box protein AGL9 homolog; Developmental protein SEPALLATA 1;Agamous-like MADS-box protein AGL11 homologue (Fragment)
Cs5g17890	Putative uncharacterized protein Sb02g008045 (Fragment)
Cs5g17920	Putative uncharacterized protein Sb06g017680;12-oxophytodienoate reductase 2; Putative 12-oxophytodienoate reductase 11; Putative 12-oxophytodienoate reductase-like protein 1; 12-oxophytodienoate reductase-like protein; N-ethylmaleimide reductase; Putative NADPH dehydrogenase C5H10.04; NADPH dehydrogenase 3; Enoate reductase 1; Probable NADPH dehydrogenase; NADH oxidase
Cs5g18110	Putative uncharacterized protein;Probable cytokinin riboside 5'-monophosphate phosphoribohydrolase LOGL6; Cytokinin riboside 5'-monophosphate phosphoribohydrolase LOG4; Cytokinin riboside 5'-monophosphate phosphoribohydrolase LOG; Transposon Ty3-I Gag-Pol polyprotein; Gag-Pol polyprotein; Pol polyprotein; Pol polyprotein (Fragment); Retrovirus-related Pol polyprotein from transposon 17.6; Gag-Pol…
Cs5g18870	Transferase, transferring glycosyl groups, putative;Probable beta-1,3-galactosyltransferase 8; Beta-1,3-galactosyltransferase 7
Cs5g19290	Pol polyprotein; Pro-Pol polyprotein; Uncharacterized mitochondrial protein AtMg00750; Gag-Pol polyprotein; Pol polyprotein (Fragment); Gag-Pol polyprotein (Fragment);Putative uncharacterized protein
Cs5g19410	TIR-NBS-LRR-TIR type disease resistance protein (Fragment);Probable WRKY transcription factor 19; Putative disease resistance protein At4g11170; TMV resistance protein N; Dynamin-2A; Dynamin-2B
Cs5g19420
Cs5g19450	TMV resistance protein N; Protein SUPPRESSOR OF npr1-1, CONSTITUTIVE 1; Putative disease resistance protein At4g11170; Probable WRKY transcription factor 19; Protein PHLOEM PROTEIN 2-LIKE A8; Vesicle-associated protein 1-4;TIR-NBS-LRR-TIR type disease resistance protein (Fragment)
Cs5g19460	TIR-NBS-LRR-TIR type disease resistance protein (Fragment);TMV resistance protein N; Putative disease resistance protein At4g11170; Protein SUPPRESSOR OF npr1-1, CONSTITUTIVE 1; Probable WRKY transcription factor 19; Protein DA1-related 4; Protein PHLOEM PROTEIN 2-LIKE A8; Vesicle-associated protein 1-4
Cs5g03780	Putative uncharacterized protein Sb04g006600;Putative copper-transporting ATPase 3; Copper-transporting ATPase RAN1; Copper-transporting ATPase 1 (Fragment); Copper-exporting P-type ATPase A; Copper-transporting P-type ATPase; Cation-transporting ATPase PacS; Probable copper-importing P-type ATPase A; Probable cation-transporting ATPase V; Probable copper-exporting P-type ATPase A; Putative catio…
Cs5g20130	NAD(P)H-dependent 6'-deoxychalcone synthase; Probable NAD(P)H-dependent oxidoreductase 1; Aldo-keto reductase family 4 member C9; NADP-dependent D-sorbitol-6-phosphate dehydrogenase; Aldose reductase; Prostaglandin F synthase 1; Alcohol dehydrogenase [NADP+]; Aldose reductase B; Aldo-keto reductase family 1 member C1 homolog; Alcohol dehydrogenase [NADP+] A; Aldose reductase C; Dihydrodiol dehydr…
Cs5g20360	TMV resistance protein N; Protein SUPPRESSOR OF npr1-1, CONSTITUTIVE 1; Putative disease resistance protein At4g11170; Probable WRKY transcription factor 19; Protein PHLOEM PROTEIN 2-LIKE A8; Vesicle-associated protein 1-4;TIR-NBS-LRR-TIR type disease resistance protein (Fragment)
Cs5g20550	Serine/threonine-protein kinase rio2;Serine/threonine-protein kinase rio2, putative
Cs5g21070	NADP-dependent alkenal double bond reductase P2; (+)-pulegone reductase; Zinc-type alcohol dehydrogenase-like protein PB24D3.08c; Prostaglandin reductase 1; Putative NADP-dependent oxidoreductase yfmJ; Putative NADP-dependent oxidoreductase yncB; Zinc-binding alcohol dehydrogenase domain-containing protein 2; Probable quinone oxidoreductase; Quinone oxidoreductase;Allyl alcohol dehydrogenase, put…
Cs5g21150	Putative disease resistance RPP13-like protein 1; Disease resistance protein RGA2; Probable disease resistance protein At5g66900;Putative uncharacterized protein (Fragment)
Cs5g21200	UDP-glycosyltransferase 74F2; Indole-3-acetate beta-glucosyltransferase; Limonoid UDP-glucosyltransferase; Cinnamate beta-D-glucosyltransferase; Cyanohydrin beta-glucosyltransferase; Anthocyanidin 5,3-O-glucosyltransferase;UDP-glucoronosyl/UDP-glucosyl transferase family protein
Cs5g21260	UDP-glycosyltransferase 74F1; Cinnamate beta-D-glucosyltransferase; Indole-3-acetate beta-glucosyltransferase;UDP-glucoronosyl/UDP-glucosyl transferase family protein
Cs5g21330	Retrotransposon protein, putative, Ty3-gypsy subclass;Genome polyprotein; Enzymatic polyprotein; Polyprotein P3; Retrovirus-related Pol polyprotein from transposon 412; Retrovirus-related Pol polyprotein from transposon gypsy; Transposon Ty3-G Gag-Pol polyprotein; Retrovirus-related Pol polyprotein from transposon opus; RNA-directed DNA polymerase homolog; Putative Pol polyprotein
Cs5g21480	Putative uncharacterized protein;Genome polyprotein
Cs5g04210	Anthranilate synthase component I and chorismate binding protein;Isochorismate synthase, chloroplastic; Isochorismate synthase 2, chloroplastic; Menaquinone-specific isochorismate synthase; Salicylate biosynthesis isochorismate synthase; Putative isochorismate synthase; Protein PHYLLO, chloroplastic; Isochorismate synthase dhbC; Vibriobactin-specific isochorismate synthase; Anthranilate synthase …
Cs5g21600	Retrotransposon protein, putative, Ty3-gypsy subclass;Genome polyprotein; Enzymatic polyprotein; Polyprotein P3; Pro-Pol polyprotein
Cs5g21610	Putative uncharacterized protein Sb03g000390;Genome polyprotein
Cs5g21640	Retrotransposon protein, putative, Ty3-gypsy subclass;Genome polyprotein; Enzymatic polyprotein; Putative enzymatic polyprotein; Transposon Ty3-I Gag-Pol polyprotein; Polyprotein P3; Retrovirus-related Pol polyprotein from transposon opus; Gag-Pol polyprotein; RNA-directed DNA polymerase homolog
Cs5g21800	Putative uncharacterized protein Sb03g011625 (Fragment)
Cs5g21840	Putative uncharacterized protein Sb09g001375 (Fragment)
Cs5g04350	Probable peptide/nitrate transporter At5g62680; Nitrate transporter 1.7; Probable nitrite transporter At1g68570; Putative peptide/nitrate transporter At1g69860; Probable peptide transporter At1g52190; Peptide transporter PTR5; Nitrate excretion transporter 1; Probable nitrate excretion transporter 2; Putative nitrate excretion transporter 7;Proton-dependent oligopeptide transport family protein
Cs5g22210	Leucine-rich repeat receptor-like serine/threonine/tyrosine-protein kinase SOBIR1; Leucine-rich repeat receptor-like serine/threonine-protein kinase At1g17230; Somatic embryogenesis receptor kinase 1; Serine/threonine-protein kinase BRI1-like 1; BRASSINOSTEROID INSENSITIVE 1-associated receptor kinase 1; Receptor-like protein kinase BRI1-like 3; Cysteine-rich receptor-like protein kinase 19; Rece…
Cs5g22320	Putative uncharacterized protein Sb02g029920
Cs5g22460	TMV resistance protein N; Putative disease resistance protein At4g11170; Protein SUPPRESSOR OF npr1-1, CONSTITUTIVE 1; Probable WRKY transcription factor 19; Protein PHLOEM PROTEIN 2-LIKE A8; Vesicle-associated protein 1-4; Protein LAP2; Leucine-rich repeat protein SHOC-2; Leucine-rich repeat-containing protein 40; Leucine-rich repeat protein lrrA; Probable disease resistance protein At5g04720; M…
Cs5g22760	Putative uncharacterized protein Sb01g032035 (Fragment)
Cs5g22790
Cs5g23370	Putative uncharacterized protein Sb03g046100
Cs5g04540	Putative uncharacterized protein Sb01g011370;Germin-like protein 3-3; Oxalate oxidase 2; Germin-like protein subfamily T member 2; Putative germin-like protein 3-4; Germin-like protein subfamily 2 member 2; Nectarin-1; Rhicadhesin receptor
Cs5g04560	RNA polymerase II C-terminal domain phosphatase-like 4; RNA polymerase II subunit A C-terminal domain phosphatase;NLI interacting factor-like phosphatase family protein, expressed
Cs5g23610	DNA-directed RNA polymerases I, II, and III 17.1 kDa polypeptide, putative;DNA-directed RNA polymerases I, II, and III subunit rpabc3; Probable DNA-directed RNA polymerases I, II, and III subunit RPABC3
Cs5g23680	Exosome complex component RRP45; Probable exosome complex exonuclease 2; Copia protein; Retrovirus-related Pol polyprotein from transposon TNT 1-94; Exosome complex exonuclease RRP42;Exosome complex exonuclease rrp45, putative
Cs5g24390	Uncharacterized protein At3g48680, mitochondrial;Putative mitochondrial NADH:ubiquinone oxidoreductase 29 kDa subunit
Cs5g24530
Cs5g25780	Transposon protein, putative, CACTA, En/Spm sub-class
Cs5g26010	Putative uncharacterized protein At2g38430/T19C21.8
Cs5g26190	Probable disease resistance protein At1g61300; Putative disease resistance protein At3g15700;Disease resistance protein RFL1, putative
Cs5g27100	Putative uncharacterized protein OSJNBa0020E23.16
Cs5g27820	Putative uncharacterized protein Sb03g043873 (Fragment)
Cs5g28770	Putative disease resistance protein RGA4; Disease resistance protein RGA2; Probable disease resistance protein At1g12280;Leucine-rich repeat containing protein, putative (Fragment)
Cs5g28970
Cs5g29210	Probable LRR receptor-like serine/threonine-protein kinase At4g08850; Probable leucine-rich repeat receptor-like protein kinase At1g35710; Leucine-rich repeat receptor-like serine/threonine-protein kinase At1g17230; LRR receptor-like serine/threonine-protein kinase GSO1; Leucine-rich repeat receptor-like protein kinase PEPR2; Receptor-like protein kinase 2; LRR receptor-like serine/threonine-prot…
Cs5g29460	Glutathione gamma-glutamylcysteinyltransferase 3;Putative uncharacterized protein OJ1123_C08.7
Cs5g30430	Putative uncharacterized protein Sb03g037190
Cs5g30770	Ankyrin repeat and sterile alpha motif domain-containing protein 1B; Protein phosphatase 1 regulatory subunit 12B;Ankyrin repeat-containing protein, putative
Cs5g30780	Ankyrin repeat and sterile alpha motif domain-containing protein 1B;Ankyrin repeat-containing protein, putative
Cs5g33920	Probable carboxylesterase 13; Carboxylesterase 1; Lipase 2; AB hydrolase superfamily protein C1039.03;A/G-specific adenine glycosylase muty, putative
Cs5g34020	Retrotransposon protein, putative, unclassified, expressed
Cs5g06680	Transcription factor jumonji and C5HC2 type zinc finger domain-containing protein;Lysine-specific demethylase REF6; Probable lysine-specific demethylase ELF6; Jumonji/ARID domain-containing protein 2; Lysine-specific demethylase lid; DNA damage-responsive transcriptional repressor RPH1; Protein Jumonji; Zinc finger protein 143
Cs5g06940	Kinesin motor domain containing protein, expressed
Cs5g07860	Putative uncharacterized protein Sb07g019863 (Fragment);Histone-lysine N-methyltransferase, H3 lysine-9 specific SUVH6; Probable histone-lysine N-methyltransferase, H3 lysine-9 specific SUVH9; Histone-lysine N-methyltransferase, H3 lysine-9, H3 lysine-27, H4 lysine-20 and cytosine specific SUVH2; YDG domain-containing protein At5g47150; Histone-lysine N-methyltransferase EHMT1; Histone-lysine N-m…
Cs5g08060	Acyl-CoA N-acyltransferase with RING/FYVE/PHD-type zinc finger protein
Cs5g08120	Novel protein similar to vertebrate ubiquitin carboxyl-terminal esterase L3 (Ubiquitin thiolesterase) (UCHL3, zgc:109963);Ubiquitin carboxyl-terminal hydrolase isozyme L3; Probable ubiquitin carboxyl-terminal hydrolase; Ubiquitin carboxyl-terminal hydrolase
Cs5g08140	BRASSINOSTEROID INSENSITIVE 1-associated receptor kinase 1, putative;G-type lectin S-receptor-like serine/threonine-protein kinase RLK1; Protein NSP-INTERACTING KINASE 2; Probable LRR receptor-like serine/threonine-protein kinase At2g23950; Probable L-type lectin-domain containing receptor kinase S.7; Proline-rich receptor-like protein kinase PERK1; Putative cysteine-rich receptor-like protein ki…
Cs5g08290	G-type lectin S-receptor-like serine/threonine-protein kinase RLK1; Protein NSP-INTERACTING KINASE 1; Probable LRR receptor-like serine/threonine-protein kinase At2g23950; Proline-rich receptor-like protein kinase PERK1; Probable L-type lectin-domain containing receptor kinase S.7; Somatic embryogenesis receptor kinase 1; BRASSINOSTEROID INSENSITIVE 1-associated receptor kinase 1; L-type lectin-d…
Cs5g08890	Chromosome 13 SCAF14566, whole genome shotgun sequence. (Fragment);Protein arginine N-methyltransferase 1.6; Putative protein arginine N-methyltransferase 10
Cs5g09570	Probable S-acyltransferase At3g60800; Palmitoyltransferase ZDHHC2; Probable palmitoyltransferase ZDHHC20; Uncharacterized protein C2F12.15c; Putative ZDHHC-type palmitoyltransferase 4;DHHC zinc finger domain containing protein, expressed
Cs5g09820	Guard cell S-type anion channel SLAC1; S-type anion channel SLAH3;C4-dicarboxylate transporter/malic acid transport family protein
Cs5g09850	Growth-regulating factor, putative,expressed (Fragment)
Cs5g09860	7-ethoxycoumarin O-deethylase; Cytochrome P450 76C4; Flavonoid 3'-monooxygenase; Cytochrome P450 76A1 (Fragment); Probable (S)-N-methylcoclaurine 3'-hydroxylase isozyme 2; (S)-N-methylcoclaurine 3'-hydroxylase isozyme 1 (Fragment); (S)-N-methylcoclaurine 3'-hydroxylase isozyme 2; Berbamunine synthase; Licodione synthase; 5-epiaristolochene 1,3-dihydroxylase; Premnaspirodiene oxygenase; 4-hydroxyp…
Cs5g09870	7-ethoxycoumarin O-deethylase; Cytochrome P450 76C4; Flavonoid 3'-monooxygenase; Probable (S)-N-methylcoclaurine 3'-hydroxylase isozyme 2; (S)-N-methylcoclaurine 3'-hydroxylase isozyme 1 (Fragment); (S)-N-methylcoclaurine 3'-hydroxylase isozyme 2; Cytochrome P450 76A1 (Fragment); Berbamunine synthase; Premnaspirodiene oxygenase; Licodione synthase; 4-hydroxyphenylacetaldehyde oxime monooxygenase;…
Cs5g09880	Cytochrome P450, family 76, subfamily C, polypeptide 6;7-ethoxycoumarin O-deethylase; Cytochrome P450 76C4; Cytochrome P450 76A1 (Fragment); (S)-N-methylcoclaurine 3'-hydroxylase isozyme 1 (Fragment); (S)-N-methylcoclaurine 3'-hydroxylase isozyme 2; Flavonoid 3'-monooxygenase; Probable (S)-N-methylcoclaurine 3'-hydroxylase isozyme 2; Berbamunine synthase; Licodione synthase; 4-hydroxyphenylacetal…
Cs5g09910	Putative uncharacterized protein Sb01g031090;Subtilisin-like protease; Cucumisin; Xylem serine proteinase 1; Serine protease AprX; M-protease; Subtilisin BPN'; Pyrolysin; Alkaline protease; Thermostable alkaline protease; Subtilisin Savinase; Subtilisin BL; Subtilisin E; Subtilisin J; Subtilisin amylosacchariticus; Subtilisin NAT
Cs5g09920	Putative uncharacterized protein Sb01g031090;Subtilisin-like protease SDD1; Xylem serine proteinase 1; Cucumisin; C5a peptidase
Cs5g09950	Transcription factor bHLH36;Putative uncharacterized protein At1g62975 (Fragment)
Cs5g09960	Glyoxylate reductase; Glyoxylate reductase/hydroxypyruvate reductase; D-3-phosphoglycerate dehydrogenase; Glyoxylate/hydroxypyruvate reductase B; Putative 2-hydroxyacid dehydrogenase C1773.17c; Probable 2-ketogluconate reductase;D-isomer specific 2-hydroxyacid dehydrogenase-like protein
Cs5g09970	Anthocyanidin synthase 1 protein;Leucoanthocyanidin dioxygenase; Flavonol synthase/flavanone 3-hydroxylase; Protein SRG1; Flavonol synthase/flavanone 3-hydroxylase (Fragment); Probable 2-oxoglutarate/Fe(II)-dependent dioxygenase; Codeine O-demethylase; Thebaine 6-O-demethylase; Naringenin,2-oxoglutarate 3-dioxygenase; Flavone synthase; Gibberellin 3-beta-dioxygenase 2-3; Naringenin,2-oxoglutarate…
Cs5g10010	Expansin-A7; Putative expansin-A30; Expansin-A18; Expansin-A16; Expansin-A4; Expansin-A3; Expansin-A14; Expansin-A6; Expansin-A9; Expansin-A2; Expansin-A23; Expansin-A12; Expansin-A13; Expansin-A8; Expansin-A1; Expansin-A25; Expansin-A11; Expansin-A15; Expansin-A33; Expansin-A32; Expansin-A31; Expansin-A29; Expansin-A22; Expansin-A24; Expansin-A28; Expansin-A5; Expansin-A17; Expansin-A10; Expansi…
Cs5g10040	Senescence-inducible chloroplast stay-green protein (Fragment)
Cs5g10050	Agamous-like MADS-box protein AGL19; MADS-box protein SOC1; MADS-box transcription factor 50; Floral homeotic protein AGAMOUS; Agamous-like MADS-box protein AGL9 homolog; Developmental protein SEPALLATA 1; Transcription factor CAULIFLOWER; Floral homeotic protein APETALA 1;Suppressor of overexpression of constans 1-like c protein
Cs5g10060	Protein FAM63A; Uncharacterized protein YGL082W;Chromosome undetermined SCAF15041, whole genome shotgun sequence. (Fragment)
Cs5g10090	Phospholipase D gamma 1; Phospholipase D beta 1; Phospholipase D delta; Phospholipase D alpha 1; Phospholipase D zeta; Phospholipase D epsilon; Phospholipase D A; Phospholipase D1; Phospholipase D C; Phospholipase D p2; Phospholipase D B; Dysferlin;Putative uncharacterized protein Sb01g031100
Cs5g10120	Subtilisin-like proteinase homolog;Cucumisin; Xylem serine proteinase 1; Subtilisin-like protease; Serine protease AprX
Cs5g10160	Protein HOTHEAD; (R)-mandelonitrile lyase-like; (R)-mandelonitrile lyase 1; L-sorbose 1-dehydrogenase; Alcohol dehydrogenase [acceptor]; Choline dehydrogenase;Glucose-methanol-choline (GMC) oxidoreductase family protein
Cs5g10170	Protein HOTHEAD; (R)-mandelonitrile lyase-like; (R)-mandelonitrile lyase 1;Glucose-methanol-choline (GMC) oxidoreductase family protein
Cs5g10180	Major Facilitator Superfamily with SPX domain-containing protein;SPX domain-containing membrane protein At4g22990; SPX domain-containing protein 5; Major facilitator superfamily domain-containing protein 8
Cs5g10190	DNA-directed RNA polymerase (Fragment);DNA-directed RNA polymerase D subunit 1; DNA-directed RNA polymerase E subunit 1; DNA-directed RNA polymerase III subunit rpc1; DNA-directed RNA polymerase II subunit RPB1-A; DNA-directed RNA polymerase subunit A'; DNA-directed RNA polymerase II subunit RPB1 (Fragments); Probable DNA-directed RNA polymerase II subunit RPB1 homolog
Cs5g11090	Putative uncharacterized protein;Genome polyprotein
Cs5g11270	Uncharacterized mitochondrial protein AtMg00310; Transposon TX1 uncharacterized 149 kDa protein;Very similar to retrotransposon reverse transcriptase
Cs5g11510	60S ribosomal protein L36; Putative 60S ribosomal protein L36-like 1;Putative uncharacterized protein Sb01g003200
Cs5g12640	Alpha-1,3/1,6-mannosyltransferase ALG2; Putative glycosyltransferase ytcC;cDNA FLJ14908 fis, clone PLACE1005953, highly similar to Alpha-1,3-mannosyltransferase ALG2
Cs5g12990	Probable leucine-rich repeat receptor-like serine/threonine-protein kinase At3g14840; Probable LRR receptor-like serine/threonine-protein kinase At1g53420; G-type lectin S-receptor-like serine/threonine-protein kinase At1g61420; Putative G-type lectin S-receptor-like serine/threonine-protein kinase At1g61610; Cysteine-rich receptor-like protein kinase 41; Putative serine/threonine-protein kinase …
Cs6g08170	Putative ribonuclease H protein At1g65750; Retrovirus-related Pol polyprotein from type-2 retrotransposable element R2DM;RNA-directed DNA polymerase (Reverse transcriptase); Polynucleotidyl transferase, Ribonuclease H fold
Cs6g08870	RNA-directed DNA polymerase (Reverse transcriptase); Polynucleotidyl transferase, Ribonuclease H fold;Putative ribonuclease H protein At1g65750; Uncharacterized mitochondrial protein AtMg01250; Retrovirus-related Pol polyprotein from type-2 retrotransposable element R2DM
Cs6g10950	RNA-directed DNA polymerase (Reverse transcriptase); Chromo; Zinc finger, CCHC-type; Peptidase aspartic, active site; Polynucleotidyl transferase, Ribonuclease H fold;Transposon Ty3-G Gag-Pol polyprotein; Retrotransposable element Tf2 155 kDa protein type 1; Retrovirus-related Pol polyprotein from transposon 297; Retrovirus-related Pol polyprotein from transposon opus; Retrovirus-related Pol poly…
Cs6g10980	Putative uncharacterized protein OJ1323_A06.34
Cs6g10990	Putative F-box/LRR-repeat protein At1g56400; F-box protein At3g59000;cDNA, clone: J090081L24, full insert sequence
Cs6g11100	Putative uncharacterized protein Sb03g004125 (Fragment);Pentatricopeptide repeat-containing protein At2g20540; Putative pentatricopeptide repeat-containing protein At3g15930; Pentatricopeptide repeat-containing protein At1g05750, chloroplastic; Putative pentatricopeptide repeat-containing protein At5g59200, chloroplastic; Pentatricopeptide repeat-containing protein At2g22410, mitochondrial
Cs6g11170	UDP-glycosyltransferase 85A3; Cyanohydrin beta-glucosyltransferase; Limonoid UDP-glucosyltransferase; Cinnamate beta-D-glucosyltransferase; Indole-3-acetate beta-glucosyltransferase; Anthocyanidin 3-O-glucosyltransferase;Transcription factor/ transferase, transferring glycosyl groups
Cs6g11370	Probable adenosylmethionine--8-amino-7-oxononanoate aminotransferase protein;Uncharacterized aminotransferase y4uB; Adenosylmethionine-8-amino-7-oxononanoate aminotransferase; Uncharacterized aminotransferase YhxA; Uncharacterized aminotransferase YodT; L-Lysine-8-amino-7-oxononanoate aminotransferase; Omega-amino acid--pyruvate aminotransferase; Acetylornithine aminotransferase
Cs6g11570	Bifunctional inhibitor/lipid-transfer protein/seed storage 2S albumin-like protein;36.4 kDa proline-rich protein
Cs6g11590
Cs6g11960	Putative uncharacterized protein (Fragment)
Cs6g12060	Serine/threonine-protein kinase BRI1-like 1; Receptor-like protein 2; LRR receptor-like serine/threonine-protein kinase GSO2; Receptor-like protein kinase 2; Leucine-rich repeat receptor protein kinase EXS; Probable LRR receptor-like serine/threonine-protein kinase At4g08850; Brassinosteroid LRR receptor kinase; Tyrosine-sulfated glycopeptide receptor 1; Phytosulfokine receptor 1; Systemin recept…
Cs6g12090	LRR receptor-like serine/threonine-protein kinase GSO1; Leucine-rich repeat receptor protein kinase EXS; Probable leucine-rich repeat receptor-like protein kinase At1g35710; Receptor-like protein kinase 2; Leucine-rich repeat receptor-like protein kinase PEPR2; Receptor-like protein 12; Leucine-rich repeat receptor-like serine/threonine-protein kinase At1g17230; Probable LRR receptor-like serine/…
Cs6g12140	Putative uncharacterized protein;Pol polyprotein; Gag-Pol polyprotein; Pol polyprotein (Fragment); Uncharacterized mitochondrial protein AtMg00750
Cs6g12160	Receptor-like protein 12; Brassinosteroid LRR receptor kinase; Systemin receptor SR160; Probable LRR receptor-like serine/threonine-protein kinase At4g36180; LRR receptor-like serine/threonine-protein kinase GSO2; Protein BRASSINOSTEROID INSENSITIVE 1; Serine/threonine-protein kinase BRI1-like 2; LRR receptor-like serine/threonine-protein kinase ERECTA; Phytosulfokine receptor 1; Leucine-rich rep…
Cs6g12370	Internalin-A; Protein phosphatase 1 regulatory subunit 7; Leucine-rich repeat-containing protein ODA7; Probable serine/threonine-protein kinase roco5; Leucine-rich repeat and guanylate kinase domain-containing protein; Leucine-rich repeat protein soc-2 homolog; Leucine-rich repeat protein SHOC-2; Protein lap1; Septation initiation network scaffold protein cdc11; Protein phosphatase 1 regulatory s…
Cs6g13380	Putative uncharacterized protein
Cs6g01970	Putative uncharacterized protein Sb03g005200
Cs6g14010
Cs6g14810	Putative uncharacterized protein F2I11_180
Cs6g02100	Probable disease resistance protein At1g61190; Putative disease resistance protein At3g15700;Disease resistance protein RFL1, putative
Cs6g02130	Probable disease resistance protein At1g61190; Putative disease resistance protein At3g15700;Disease resistance protein RFL1, putative
Cs6g02140	Resistance protein candidate RGC20 (Fragment)
Cs6g16360	Peroxisomal membrane protein MPV17 and related proteins (ISS);PXMP2/4 family protein 4; Protein sym-1
Cs6g16500	S-locus F-box-like protein a (Fragment)
Cs6g16510	Receptor-like protein kinase FERONIA; Putative receptor-like protein kinase At5g39000; Probable receptor-like protein kinase At5g38990; Receptor-like protein kinase ANXUR1; Receptor-like protein kinase HERK 1; Receptor-like protein kinase THESEUS 1; Probable LRR receptor-like serine/threonine-protein kinase At1g06840; Nodulation receptor kinase; Serine/threonine-protein kinase At3g07070; Proline-…
Cs6g16690	Putative uncharacterized protein T17F3.2
Cs6g02210	ABC transporter family, pleiotropic drug resistance protein;Pleiotropic drug resistance protein 3; ABC transporter G family member 37; Putative pleiotropic drug resistance protein 7; Probable pleiotropic drug resistance protein 1
Cs6g02230	Putative non-LTR retroelement reverse transcriptase;Uncharacterized mitochondrial protein AtMg01250; Retrovirus-related Pol polyprotein from type-1 retrotransposable element R2 (Fragment)
Cs6g17885	Putative uncharacterized protein Sb01g013450;E3 ubiquitin-protein ligase SINA-like 7
Cs6g18560	Putative uncharacterized protein Sb01g043740
Cs6g20280	ABC transporter B family member 15; Putative multidrug resistance protein; Putative ABC transporter B family member 8; Multidrug resistance protein 1; Bile salt export pump; Multidrug resistance protein homolog 49; ATP-binding cassette sub-family B member 5; Leptomycin B resistance protein pmd1;ATP-binding cassette transporter, subfamily B, member 11, group MDR/PGP protein PpABCB11
Cs6g20440	Cell Division Protein AAA ATPase family, putative, expressed
Cs6g21700	Pentatricopeptide (PPR) repeat-containing protein-like;Pentatricopeptide repeat-containing protein At5g39350; Pentatricopeptide repeat-containing protein At3g46790, chloroplastic; Putative pentatricopeptide repeat-containing protein At3g23330; Pentatricopeptide repeat-containing protein At4g16835, mitochondrial; Putative pentatricopeptide repeat-containing protein At5g59200, chloroplastic; Putati…
Cs6g02410	Putative uncharacterized protein
Cs6g01080	Putative uncharacterized protein (Fragment);Putative disease resistance RPP13-like protein 1; Disease resistance protein RGA2
Cs6g02710	Wall-associated receptor kinase-like 9; Putative wall-associated receptor kinase-like 11; Wall-associated receptor kinase 5; Proline-rich receptor-like protein kinase PERK12; Probable receptor-like protein kinase At1g30570; Probable LRR receptor-like serine/threonine-protein kinase At1g06840; Putative proline-rich receptor-like protein kinase PERK11; Receptor-like protein kinase HERK 1; Probable …
Cs6g02870
Cs6g03090	Putative uncharacterized protein At2g28580
Cs6g03870	RNA-directed DNA polymerase (Reverse transcriptase); Chromo; Zinc finger, CCHC-type; Peptidase aspartic, active site; Polynucleotidyl transferase, Ribonuclease H fold;Retrotransposable element Tf2 155 kDa protein type 1; Transposon Ty3-I Gag-Pol polyprotein; Pol polyprotein (Fragment); Pol polyprotein
Cs6g04170	Putative uncharacterized protein
Cs6g04220	Very similar to retrotransposon reverse transcriptase
Cs6g04380	Transposon protein, putative, CACTA, En/Spm sub-class
Cs6g04400	Predicted protein
Cs6g04680	Pentatricopeptide repeat-containing protein At3g53360, mitochondrial; Pentatricopeptide repeat-containing protein At3g49170, chloroplastic; Pentatricopeptide repeat-containing protein At4g39530; Putative pentatricopeptide repeat-containing protein At2g01510; Putative pentatricopeptide repeat-containing protein At5g13230, mitochondrial;Putative uncharacterized protein Sb08g002505 (Fragment)
Cs6g04690	Probable LRR receptor-like serine/threonine-protein kinase At4g08850; Probable leucine-rich repeat receptor-like protein kinase At1g35710; Leucine-rich repeat receptor-like serine/threonine-protein kinase At1g17230; LRR receptor-like serine/threonine-protein kinase GSO2; Leucine-rich repeat receptor protein kinase EXS; Leucine-rich repeat receptor-like protein kinase PEPR1; Receptor-like protein …
Cs6g04700	Pentatricopeptide repeat-containing protein At3g53360, mitochondrial; Pentatricopeptide repeat-containing protein At3g49170, chloroplastic; Pentatricopeptide repeat-containing protein At4g39530; Putative pentatricopeptide repeat-containing protein At2g01510; Putative pentatricopeptide repeat-containing protein At1g69350, mitochondrial;Putative uncharacterized protein Sb08g002505 (Fragment)
Cs6g04760	Leucine-rich repeat family protein / protein kinase family protein;Probable LRR receptor-like serine/threonine-protein kinase At4g08850; Probable leucine-rich repeat receptor-like protein kinase At1g35710; Phytosulfokine receptor 1; Leucine-rich repeat receptor-like serine/threonine-protein kinase At1g17230; Leucine-rich repeat receptor-like protein kinase PXL2; LRR receptor-like serine/threonine…
Cs6g05240	Putative uncharacterized protein (Fragment);Putative disease resistance RPP13-like protein 1; Disease resistance protein RGA2
Cs6g05630
Cs6g05670	Uncharacterized mitochondrial protein AtMg00310;Putative non-LTR retroelement reverse transcriptase
Cs6g01430	Predicted protein
Cs6g06460	Uncharacterized mitochondrial protein AtMg00310;Putative non-LTR retroelement reverse transcriptase
Cs6g06480	Transcription factor AS1; Protein rough sheath 2 homolog; Protein rough sheath 2; Transcription factor GAMYB; Myb-related protein 306; Transcription factor WER; Trichome differentiation protein GL1; Myb-related protein P; Transcription repressor MYB5; Anthocyanin regulatory C1 protein; Myb-like protein A; Protein ODORANT1; Myb-related protein A;Myb-like DNA-binding domain containing protein, expr…
Cs6g07350	Putative uncharacterized protein OSJNBa0054K20.23
Cs6g07480	Tubulin beta-2/beta-3 chain; Tubulin beta chain; Tubulin beta-2 chain (Fragment);Putative uncharacterized protein Sb01g050310
Cs6g07640
Cs6g07710
Cs6g01590	Putative uncharacterized protein
Cs7g14540	Probable disease resistance protein At5g63020; Putative disease resistance protein At4g10780; Disease resistance protein RPS5;LRR and NB-ARC domain-containing disease resistance protein
Cs7g14980
Cs7g15170	Tetratricopeptide repeat (TPR)-containing protein-like protein
Cs7g15440
Cs7g15480	Cytochrome P450 89A2; Cytochrome P450 77A1 (Fragment); 5-epiaristolochene 1,3-dihydroxylase; Tabersonine 16-hydroxylase (Fragment); Psoralen synthase;Cytochrome P450, family 87, subfamily A, polypeptide 6
Cs7g16010	Putative uncharacterized protein Sb06g001780
Cs7g16710	Retrotransposon protein, putative, unclassified, expressed;Uncharacterized mitochondrial protein AtMg00310; Retrovirus-related Pol polyprotein LINE-1; Retrovirus-related Pol polyprotein from type-1 retrotransposable element R2 (Fragment)
Cs7g17320	Putative uncharacterized protein (Fragment)
Cs7g17640	Myrcene synthase, chloroplastic; (+)-alpha-pinene synthase, chloroplastic; (-)-limonene synthase, chloroplastic; 1,8-cineole synthase, chloroplastic; Beta-myrcene/(E)-beta-ocimene synthase 2, chloroplastic; (R)-limonene synthase 1; R-linalool synthase QH5, chloroplastic; R-linalool synthase QH1, chloroplastic (Fragment); Isoprene synthase, chloroplastic; Alpha-zingiberene synthase; (E,E)-alpha-fa…
Cs7g17660	Putative uncharacterized protein Sb01g034805 (Fragment)
Cs7g17930	Eukaryotic translation initiation factor 2c, putative;Protein argonaute 5; Protein argonaute-2 (Fragment); Protein argonaute-2
Cs7g17940	Protein argonaute 5; Protein argonaute-2; Protein argonaute-2 (Fragment); Putative protein tag-76;Eukaryotic translation initiation factor 2c, putative
Cs7g18150	Leucine-rich repeat receptor protein kinase EXS, putative;G-type lectin S-receptor-like serine/threonine-protein kinase At1g11330; Cysteine-rich receptor-like protein kinase 10; Putative cysteine-rich receptor-like protein kinase 35; Putative G-type lectin S-receptor-like serine/threonine-protein kinase At1g61610; Receptor-like serine/threonine-protein kinase SD1-7
Cs7g18190	Serine/threonine-protein kinase PBS1, putative;G-type lectin S-receptor-like serine/threonine-protein kinase At1g11330; Cysteine-rich receptor-like protein kinase 25; Putative cysteine-rich receptor-like protein kinase 35; Receptor-like serine/threonine-protein kinase SD1-6; Putative G-type lectin S-receptor-like serine/threonine-protein kinase At1g61610; Putative serine/threonine-protein kinase …
Cs7g18220
Cs7g18230	Acidic mammalian chitinase; G-type lectin S-receptor-like serine/threonine-protein kinase At4g27290; Chitotriosidase-1; Cysteine-rich receptor-like protein kinase 5; Chitinase-3-like protein 1; Putative cysteine-rich receptor-like protein kinase 35; Putative G-type lectin S-receptor-like serine/threonine-protein kinase At1g61610; Receptor-like serine/threonine-protein kinase SD1-6;Glycosyl hydrol…
Cs7g18620	Ankyrin repeat BTB/POZ domain-containing protein;Regulatory protein NPR3
Cs7g18990	Uncharacterized mitochondrial protein AtMg00310;Putative uncharacterized protein Sb05g019526 (Fragment)
Cs7g19020	Putative uncharacterized protein (Precursor)
Cs7g19040	Uncharacterized mitochondrial protein AtMg00310;Putative reverse transcriptase/RNA-dependent DNA polymerase
Cs7g19050	Putative hAT family dimerisation domain containing protein, identical
Cs7g19570	Agmatine coumaroyltransferase; Anthocyanin 5-aromatic acyltransferase; Malonyl-coenzyme:anthocyanin 5-O-glucoside-6'''-O-malonyltransferase;Anthocyanin 5-aromatic acyltransferase/benzoyltransferase-like protein
Cs7g20030	Putative uncharacterized protein Sb0444s002010 (Fragment)
Cs7g20080	Putative uncharacterized protein Sb05g018443 (Fragment)
Cs7g20120	Putative uncharacterized protein;Retrovirus-related Pol polyprotein from transposon opus; Retrovirus-related Pol polyprotein from transposon 17.6; Retrovirus-related Pol polyprotein from transposon gypsy; Retrotransposable element Tf2 155 kDa protein type 1; Pol polyprotein; Gag-Pol polyprotein; Pol polyprotein (Fragment); Gag-Pol polyprotein (Fragment); Transposon Ty3-I Gag-Pol polyprotein; Unch…
Cs7g20450	Putative AC transposase; Putative AC9 transposase;HAT family dimerisation domain containing protein
Cs7g20510
Cs7g20600	F-box protein At4g09920; FBD-associated F-box protein At5g38590;FBD, F-box and leucine rich repeat domain-containing protein
Cs7g20640	Putative ribonuclease H protein At1g65750; Uncharacterized mitochondrial protein AtMg00310;RNA-directed DNA polymerase (Reverse transcriptase); Polynucleotidyl transferase, Ribonuclease H fold
Cs7g20660	Putative uncharacterized protein Sb01g009580;WD repeat-containing protein 5; Protein will die slowly; WD repeat-containing protein 5 homolog; Uncharacterized WD repeat-containing protein ZC302.2; Protein Mut11; Set1 complex component swd3; Probable serine/threonine-protein kinase pkwA; F-box/WD repeat-containing protein 7; Lissencephaly-1 homolog
Cs7g20780	Hippocampus abundant transcript 1 protein, putative
Cs7g20910	Putative retroelement pol polyprotein;Retrovirus-related Pol polyprotein from transposon opus; Transposon Ty3-I Gag-Pol polyprotein; Retrovirus-related Pol polyprotein from transposon 17.6; Retrovirus-related Pol polyprotein from transposon gypsy; Uncharacterized protein K02A2.6; Enzymatic polyprotein; RNA-directed DNA polymerase homolog
Cs7g21150	Phytocyanin-like arabinogalactan-protein (Precursor);Mavicyanin; Stellacyanin; Early nodulin-like protein 1; Blue copper protein; Basic blue protein; Early nodulin-55-2; Chemocyanin
Cs7g21560	Putative uncharacterized protein Sb10g025790
Cs7g22160	Putative uncharacterized protein
Cs7g22430	NAC domain-containing protein 100; Protein BEARSKIN1; Protein CUP-SHAPED COTYLEDON 2; Protein FEZ; Putative NAC domain-containing protein 94; Protein SOMBRERO;NAC domain-containing protein 21/22, putative
Cs7g22440	Putative uncharacterized protein OSJNBa0019N10.20
Cs7g23290	Uncharacterized mitochondrial protein AtMg00310;Putative non-LTR retroelement reverse transcriptase
Cs7g04380	Glyoxal oxidase N-terminus family protein, expressed
Cs7g23400	Putative uncharacterized protein
Cs7g23420	Putative uncharacterized protein (Fragment)
Cs7g23430	Transposon protein, putative, CACTA, En/Spm sub-class
Cs7g23460	Transposon TX1 uncharacterized 149 kDa protein; Retrovirus-related Pol polyprotein LINE-1; Uncharacterized mitochondrial protein AtMg00310;Putative non-LTR retroelement reverse transcriptase
Cs7g23540	Putative uncharacterized protein P0575F10.13
Cs7g23660	Transposon protein, putative, Mutator sub-class
Cs7g23700
Cs7g24440	Putative non-LTR retroelement reverse transcriptase;Uncharacterized mitochondrial protein AtMg01250
Cs7g24600	Putative uncharacterized protein;Transposon Ty3-I Gag-Pol polyprotein; Retrovirus-related Pol polyprotein from transposon 17.6; Retrovirus-related Pol polyprotein from transposon opus; Retrotransposable element Tf2 155 kDa protein type 3; Retrovirus-related Pol polyprotein from transposon gypsy; Pol polyprotein (Fragment); Uncharacterized mitochondrial protein AtMg00750; Gag-Pol polyprotein; RNA-…
Cs7g24610
Cs7g25020	Putative uncharacterized protein;Transposon Ty3-I Gag-Pol polyprotein; Retrovirus-related Pol polyprotein from transposon 412
Cs7g25530	Novel protein similar to vertebrate protein disulfide isomerase-associated 3 (PDIA3);Protein disulfide isomerase-like 1-4; Probable protein disulfide-isomerase A4; Protein disulfide-isomerase 2
Cs7g25690
Cs7g26310	Putative non-LTR retroelement reverse transcriptase;Uncharacterized mitochondrial protein AtMg01250
Cs7g26400	Actin-related protein 4; Actin-like protein 6A; Actin-1; Actin; Actin, cytoskeletal; Actin-3, muscle-specific; Actin-2, muscle-specific; Actin-3; Actin, adductor muscle; Actin, cytoplasmic 1; Actin-87E; Actin-57B; Actin-5, muscle-specific; Actin, cytoplasmic type 5;Actin-related protein Arp2/3 complex, subunit Arp2 (ISS)
Cs7g26610
Cs7g26850	Putative uncharacterized protein Sb04g022090
Cs7g26870	Ubiquitin carboxyl-terminal hydrolase family protein, expressed;Paternally-expressed gene 3 protein
Cs7g27210	Aminodeoxychorismate synthase, glutamine amidotransferase subunit / aminodeoxychorismate synthase, subunit I;Para-aminobenzoate synthase; Para-aminobenzoate synthase component 1; Anthranilate synthase component 1; Anthranilate synthase component I-like protein; Probable anthranilate synthase component 1; Anthranilate synthase component I-2, chloroplastic
Cs7g29030	Putative uncharacterized protein Sb08g020133 (Fragment)
Cs7g29490	Uncharacterized protein At5g05190;Putative uncharacterized protein Sb01g036210
Cs7g31050	Carboxy-terminal domain RNA polymerase II polypeptide A small phosphatase, putative;Probable C-terminal domain small phosphatase; CTD small phosphatase-like protein; Carboxy-terminal domain RNA polymerase II polypeptide A small phosphatase 2; Probable phosphatase PSR2; Uncharacterized protein C2F7.02c; Mitochondrial import inner membrane translocase subunit TIM50; Phosphatase PSR1; CTD nuclear en…
Cs7g01020	Putative uncharacterized protein AT4g15600
Cs7g07760	Endonuclease V; Putative endonuclease C1F12.06c;Chromosome undetermined SCAF14002, whole genome shotgun sequence. (Fragment)
Cs7g08290	Auxin-induced protein 5NG4;Putative uncharacterized protein At4g15540 (Fragment)
Cs7g08900	Sphingoid base hydroxylase 1; Uncharacterized hydroxylase C887.15c; Sphingolipid C4-hydroxylase SUR2; Methylsterol monooxygenase 1;Putative Sur2p: syringomycin response protein
Cs7g10290
Cs7g10300	ATP-dependent DNA helicase Q-like 5; ATP-dependent DNA helicase Q4; Probable ATP-dependent DNA helicase recQ; ATP-dependent DNA helicase recQ; Bloom syndrome protein homolog; ATP-dependent helicase SGS1; Putative ATP-dependent RNA helicase R290; Bloom syndrome protein; Putative ATP-dependent DNA helicase Q1; Bloom syndrome protein homolog (Fragment); Probable ATP-dependent DNA helicase recS; Wern…
Cs7g10760
Cs7g11780	Putative AC transposase; Putative AC9 transposase;HAT family dimerisation domain containing protein
Cs7g11850	Ulp1 protease family, C-terminal catalytic domain-containing protein
Cs7g11870	Cytochrome P450 734A1; Secologanin synthase; Cytokinin hydroxylase; Leukotriene-B(4) omega-hydroxylase 1; Leukotriene-B4 omega-hydroxylase 3; Putative cytochrome P450 cyp-13B1; Probable cytochrome P450 4s3;Putative uncharacterized protein Sb03g004210
Cs7g11970	D-aminoacyl-tRNA deacylase; D-tyrosyl-tRNA(Tyr) deacylase;Putative uncharacterized protein Sb10g023620
Cs7g13080	Aluminum-activated malate transporter 4; Putative aluminum-activated malate transporter 3;Putative aluminum-activated malate transporter
Cs7g13630	Putative helicase Mov10l1;Putative uncharacterized protein RHEL902 (Fragment)
Cs7g14000	Protein gar2; Nucleolin; Probable RNA-binding protein 23; Uncharacterized RNA-binding protein C4F6.14; 29 kDa ribonucleoprotein B, chloroplastic; Polyadenylate-binding protein 2; Nuclear localization sequence-binding protein; Eukaryotic translation initiation factor 4H;Function: High levels of CP-RBP30 mRNA was found in leaves but not in roots
Cs7g14110	Probable LRR receptor-like serine/threonine-protein kinase At3g47570; Putative receptor-like protein kinase At3g47110; LRR receptor-like serine/threonine-protein kinase EFR; Putative leucine-rich repeat receptor-like serine/threonine-protein kinase At2g24130; LRR receptor-like serine/threonine-protein kinase FLS2; Leucine-rich repeat receptor-like serine/threonine-protein kinase At1g17230; Recept…
Cs7g14150	Serine-threonine protein kinase, plant-type, putative (Fragment);Probable LRR receptor-like serine/threonine-protein kinase At3g47570; Putative receptor-like protein kinase At3g47110; LRR receptor-like serine/threonine-protein kinase EFR; Putative leucine-rich repeat receptor-like serine/threonine-protein kinase At2g24130; LRR receptor-like serine/threonine-protein kinase FLS2; Leucine-rich repea…
Cs7g14160	Probable LRR receptor-like serine/threonine-protein kinase At3g47570; LRR receptor-like serine/threonine-protein kinase EFR; Putative receptor-like protein kinase At3g47110; Putative leucine-rich repeat receptor-like serine/threonine-protein kinase At2g24130; LRR receptor-like serine/threonine-protein kinase FLS2; Leucine-rich repeat receptor protein kinase EXS; Tyrosine-sulfated glycopeptide rec…
Cs7g14190	Tetratricopeptide repeat protein 27 homolog; Tetratricopeptide repeat protein 27; TPR repeat-containing protein C19B12.01;Tetratricopeptide repeat (TPR)-containing protein-like protein
Cs8g10840
Cs8g10850	Transposon protein, putative, CACTA, En/Spm sub-class
Cs8g11120	Retrotransposon protein, putative, Ty3-gypsy subclass;Retrovirus-related Pol polyprotein from transposon 17.6; Retrovirus-related Pol polyprotein from transposon opus; Retrotransposable element Tf2 155 kDa protein type 1; Gag-Pol polyprotein; Pol polyprotein; Gag-Pol polyprotein (Fragment); Pol polyprotein (Fragment); Retrovirus-related Pol polyprotein from transposon gypsy; Transposon Ty3-I Gag-…
Cs8g11210
Cs8g11270	Transposon TX1 uncharacterized 149 kDa protein;Putative uncharacterized protein Sb05g005061 (Fragment)
Cs8g11460	Putative uncharacterized protein
Cs8g11500	Putative uncharacterized protein B1153F04.33
Cs8g11680	Predicted protein
Cs8g11790	Retrotransposon protein, putative, unclassified, expressed
Cs8g11850
Cs8g12030
Cs8g12200	Transposon Ty3-I Gag-Pol polyprotein; Retrovirus-related Pol polyprotein from transposon 297; Retrovirus-related Pol polyprotein from transposon opus; Retrovirus-related Pol polyprotein from transposon gypsy; Gag-Pol polyprotein; Pol polyprotein; Pol polyprotein (Fragment); Gag-Pol polyprotein (Fragment); Uncharacterized mitochondrial protein AtMg00750; RNA-directed DNA polymerase homolog; Putati…
Cs8g12750
Cs8g12940	Probable LRR receptor-like serine/threonine-protein kinase At1g53430; Probable leucine-rich repeat receptor-like serine/threonine-protein kinase At3g14840; G-type lectin S-receptor-like serine/threonine-protein kinase At1g11330; LRR receptor-like serine/threonine-protein kinase GSO1; Probable leucine-rich repeat receptor-like protein kinase At1g35710; G-type lectin S-receptor-like serine/threonin…
Cs8g03310	Uncharacterized protein At3g49720;Putative uncharacterized protein Sb03g006320
Cs8g13130
Cs8g13470	Putative ribonuclease H protein At1g65750; Uncharacterized mitochondrial protein AtMg00310;RNA-directed DNA polymerase (Reverse transcriptase); Polynucleotidyl transferase, Ribonuclease H fold
Cs8g13480	LINE-type retrotransposon LIb DNA, complete sequence, Insertion at the S10 site
Cs8g13920	Cold-induced wall associated kinase (Fragment);Wall-associated receptor kinase-like 8; Putative wall-associated receptor kinase-like 13
Cs8g14010	Wall-associated receptor kinase-like 2; Putative wall-associated receptor kinase-like 11; Wall-associated receptor kinase 5; Probable LRR receptor-like serine/threonine-protein kinase At1g67720; Proline-rich receptor-like protein kinase PERK2; Probable receptor-like protein kinase At4g39110; Cysteine-rich receptor-like protein kinase 42; Probable serine/threonine-protein kinase At1g01540; Putativ…
Cs8g14380	Putative AC transposase; Putative AC9 transposase;Putative uncharacterized protein Sb03g015311 (Fragment)
Cs8g14640
Cs8g14840	LRR receptor-like serine/threonine-protein kinase GSO1; Receptor-like protein kinase 2; Receptor-like protein 12; Probable leucine-rich repeat receptor-like protein kinase At5g63930; Leucine-rich repeat receptor-like serine/threonine-protein kinase At1g17230; Phytosulfokine receptor 1; Serine/threonine-protein kinase BRI1-like 2; Tyrosine-sulfated glycopeptide receptor 1; Systemin receptor SR160;…
Cs8g14910
Cs8g15150	Zinc finger A20 and AN1 domain-containing stress-associated protein 3; AN1-type zinc finger protein 6; Zinc finger AN1 domain-containing stress-associated protein 14; Putative zinc finger A20 and AN1 domain-containing stress-associated protein 8; AN1-type zinc finger and ubiquitin domain-containing protein 1;Zinc finger A20 and AN1 domains-containing protein
Cs8g15270	Pentatricopeptide repeat-containing protein At2g32230, mitochondrial;Putative uncharacterized protein Sb02g036790
Cs8g15280	Putative hAT family dimerisation domain containing protein, identical
Cs8g15350	Lysosomal Pro-X carboxypeptidase; Dipeptidyl peptidase 2; Prolyl carboxy peptidase like protein 5;Alpha/beta-hydrolase domain-containing protein
Cs8g16490	CC-NBS-LRR class disease resistance protein;Probable disease resistance protein RDL6/RF9; Inactive disease susceptibility protein LOV1; Disease resistance protein RPP8; Putative disease resistance RPP13-like protein 3; Putative late blight resistance protein homolog R1B-11
Cs8g17280	Arogenate dehydratase/prephenate dehydratase 2, chloroplastic; Arogenate dehydratase 3, chloroplastic; P-protein; Prephenate dehydratase; Putative prephenate dehydratase;Putative uncharacterized protein Sb01g038740
Cs8g03980	Probable peptide transporter At1g52190; Probable peptide/nitrate transporter At3g16180; Nitrate transporter 1.7; Putative peptide/nitrate transporter At5g11570; Probable nitrite transporter At1g68570; Peptide transporter PTR1; Probable nitrate excretion transporter 2; Nitrate excretion transporter 1; Putative nitrate excretion transporter 7;Proton-dependent oligopeptide transport family protein
Cs8g04000	Probable peptide transporter At1g52190; Probable peptide/nitrate transporter At3g16180; Nitrate transporter 1.7; Putative peptide/nitrate transporter At5g11570; Probable nitrite transporter At1g68570; Peptide transporter PTR1; Probable nitrate excretion transporter 2; Putative nitrate excretion transporter 7; Nitrate excretion transporter 1;Proton-dependent oligopeptide transport family protein
Cs8g17840	Disease resistance-responsive (Dirigent-like protein) family protein
Cs8g17880	Riboflavin biosynthesis protein ribBA, chloroplastic; Riboflavin biosynthesis protein ribBA;GTP cyclohydrolase II/3,4-dihydroxy-2-butanone-4-phosphate synthase-like protein (Fragment)
Cs8g04060	Putative uncharacterized protein Sb01g031580
Cs8g18620	Putative ribonuclease H protein At1g65750;RNA-directed DNA polymerase (Reverse transcriptase); Ribonuclease H; Endonuclease/exonuclease/phosphatase
Cs8g19105	Tropinone reductase homolog At1g07440; Tropinone reductase 2; Granaticin polyketide synthase putative ketoacyl reductase 1; Dehydrogenase/reductase SDR family member 4; Oxidoreductase ucpA; D-arabinitol 2-dehydrogenase [ribulose-forming]; Uncharacterized short-chain type dehydrogenase/reductase y4mP; Putative ketoacyl reductase; Sorbose reductase sou1; L-xylulose reductase; 17-beta-hydroxysteroid…
Cs8g04420	Contains similarity to 22 kDa peroxisomal membrane protein;PXMP2/4 family protein 4; Mpv17-like protein
Cs8g05560	Putative uncharacterized protein ORF05
Cs8g05720	PreP peptidase. Metallo peptidase. MEROPS family M16C;Presequence protease 2, chloroplastic/mitochondrial; Protein hypA; Presequence protease, mitochondrial; Mitochondrial presequence protease; Uncharacterized protein BB_0228
Cs8g06180
Cs8g06230	Putative uncharacterized protein;Genome polyprotein
Cs8g06350
Cs8g06670	Retrovirus-related Pol polyprotein from transposon TNT 1-94; Uncharacterized mitochondrial protein AtMg00810; Copia protein; Putative transposon Ty5-1 protein YCL074W;Integrase core domain containing protein
Cs8g06910	Putative ribonuclease H protein At1g65750; Transposon TX1 uncharacterized 149 kDa protein; Uncharacterized mitochondrial protein AtMg00310;RNA-directed DNA polymerase (Reverse transcriptase); Polynucleotidyl transferase, Ribonuclease H fold
Cs8g01820	Protein XRI1;Putative uncharacterized protein (Fragment)
Cs8g07540	Helicase domain and pentatricopeptide repeat-containing protein;Putative pentatricopeptide repeat-containing protein At1g12700, mitochondrial; Pentatricopeptide repeat-containing protein At1g12775, mitochondrial; Pentatricopeptide repeat-containing protein At1g12620; Pentatricopeptide repeat-containing protein At1g62930, chloroplastic; Protein Rf1, mitochondrial; Putative pentatricopeptide repeat…
Cs8g07700	Probable disease resistance protein At1g12280; Disease resistance protein RPS5; Putative disease resistance protein At3g15700;Late blight resistance protein R1-A, putative
Cs8g08120	Putative uncharacterized protein (Fragment)
Cs8g08510
Cs8g08570	Helicase domain and pentatricopeptide repeat-containing protein;Putative pentatricopeptide repeat-containing protein At1g12700, mitochondrial; Pentatricopeptide repeat-containing protein At1g62930, chloroplastic; Pentatricopeptide repeat-containing protein At1g63080, mitochondrial; Pentatricopeptide repeat-containing protein At1g62910; Protein Rf1, mitochondrial; Putative pentatricopeptide repeat…
Cs8g08780	Retrotransposon protein, putative, Ty1-copia sub-class (Fragment);Copia protein; Retrovirus-related Pol polyprotein from transposon TNT 1-94; Uncharacterized mitochondrial protein AtMg00810
Cs8g08800	Putative calcium-binding EF-hand protein (Fragment)
Cs8g08910	Putative uncharacterized protein Sb01g043640
Cs8g09240	CTV.20
Cs8g09380	Non-LTR retrolelement reverse transcriptase-like protein
Cs8g09460	Putative uncharacterized protein
Cs8g10140	Probable purine permease 5; Purine permease 3;Putative uncharacterized protein Sb02g027100
Cs8g10240	HAT family dimerisation domain containing protein
Cs8g10290	Putative disease resistance protein At4g11170; TMV resistance protein N; Protein SUPPRESSOR OF npr1-1, CONSTITUTIVE 1;Putative NBS-LRR type disease resistance protein (Fragment)
Cs8g10320	Putative uncharacterized protein (Fragment)
Cs8g10460	Putative uncharacterized protein
Cs8g10540	Putative uncharacterized protein Sb02g008045 (Fragment)
Cs8g10590	Putative non-LTR retroelement reverse transcriptase;Uncharacterized mitochondrial protein AtMg01250
Cs9g11910	Periplasmic polyamine-binding protein of ABC transporter (Precursor)
Cs9g12090	Amino acid permease family protein, putative, expressed
Cs9g12220	LRR receptor-like serine/threonine-protein kinase GSO2; Leucine-rich repeat receptor protein kinase EXS; Probable leucine-rich repeat receptor-like protein kinase At1g35710; Probable LRR receptor-like serine/threonine-protein kinase At4g36180; Systemin receptor SR160; Brassinosteroid LRR receptor kinase; Serine/threonine-protein kinase BRI1-like 2; Leucine-rich repeat receptor-like serine/threoni…
Cs9g12350	Putative uncharacterized protein
Cs9g12540	Putative no apical meristem (NAM) protein;NAC domain-containing protein 68; Protein CUP-SHAPED COTYLEDON 1
Cs9g12750	Probable LRR receptor-like serine/threonine-protein kinase At3g47570; Putative receptor-like protein kinase At3g47110; LRR receptor-like serine/threonine-protein kinase EFR; LRR receptor-like serine/threonine-protein kinase FLS2; Putative leucine-rich repeat receptor-like serine/threonine-protein kinase At2g24130; Probable leucine-rich repeat receptor-like protein kinase At2g33170; LRR receptor-l…
Cs9g12890	Probable LRR receptor-like serine/threonine-protein kinase At3g47570; LRR receptor-like serine/threonine-protein kinase EFR; Putative receptor-like protein kinase At3g47110; LRR receptor-like serine/threonine-protein kinase FLS2; Leucine-rich repeat receptor-like serine/threonine-protein kinase At1g17230; Putative leucine-rich repeat receptor-like serine/threonine-protein kinase At2g24130; System…
Cs9g12910	LRR receptor-like serine/threonine-protein kinase EFR; Probable leucine-rich repeat receptor-like protein kinase At2g33170; LRR receptor-like serine/threonine-protein kinase FLS2; Receptor-like protein kinase 2; Probable LRR receptor-like serine/threonine-protein kinase At3g47570; Putative receptor-like protein kinase At3g47110; LRR receptor-like serine/threonine-protein kinase ERECTA; Leucine-ri…
Cs9g12980
Cs9g13230	Putative disease resistance protein RGA1; Disease resistance protein RGA2;Disease resistance protein; Calcium-binding EF-hand
Cs9g13400	Retrovirus-related Pol polyprotein from transposon opus; Retrovirus-related Pol polyprotein from transposon 17.6; Pol polyprotein; Pol polyprotein (Fragment); Uncharacterized mitochondrial protein AtMg00750; Gag-Pol polyprotein;Putative uncharacterized protein (Fragment)
Cs9g13490	Probable LRR receptor-like serine/threonine-protein kinase At3g47570; Leucine-rich repeat receptor-like serine/threonine-protein kinase BAM1; LRR receptor-like serine/threonine-protein kinase ERECTA; LRR receptor-like serine/threonine-protein kinase EFR; Leucine-rich repeat receptor-like protein kinase PXL2; LRR receptor-like serine/threonine-protein kinase ERL1; Leucine-rich repeat receptor prot…
Cs9g13500	Probable LRR receptor-like serine/threonine-protein kinase At3g47570; Putative receptor-like protein kinase At3g47110; LRR receptor-like serine/threonine-protein kinase EFR; LRR receptor-like serine/threonine-protein kinase FLS2; Leucine-rich repeat receptor-like serine/threonine-protein kinase BAM2; Probable leucine-rich repeat receptor-like protein kinase At2g33170; Putative leucine-rich repeat…
Cs9g13520	Probable LRR receptor-like serine/threonine-protein kinase At3g47570; Putative receptor-like protein kinase At3g47110; LRR receptor-like serine/threonine-protein kinase EFR; LRR receptor-like serine/threonine-protein kinase GSO1; Putative leucine-rich repeat receptor-like serine/threonine-protein kinase At2g24130; Leucine-rich repeat receptor-like protein kinase PEPR2; Probable leucine-rich repea…
Cs9g14960
Cs9g15130	Putative uncharacterized protein Sb01g013215 (Fragment);Protein DYAD
Cs9g15170	Hexose carrier protein HEX6; Sugar transport protein 1; Sugar carrier protein C; Sugar carrier protein A; H(+)/hexose cotransporter 1; Probable polyol transporter 3; Probable glucose transporter rco-3;Hexose carrier protein HEX6, putative, expressed
Cs9g15300	Hexose carrier protein HEX6; Sugar transport protein 3; Sugar carrier protein C; Sugar carrier protein A; H(+)/hexose cotransporter 1; Galactose-proton symporter; Probable polyol transporter 3; Facilitated trehalose transporter Tret1-2 homolog;Hexose carrier protein HEX6, putative, expressed
Cs9g15490	Ankyrin repeat-containing protein, putative
Cs9g15520
Cs9g15620	Serine/threonine-protein kinase BIK1; Protein kinase 2B, chloroplastic; Probable receptor-like protein kinase At3g55450; Probable serine/threonine-protein kinase NAK; Proline-rich receptor-like protein kinase PERK14; Probable serine/threonine-protein kinase Cx32, chloroplastic; Receptor-like serine/threonine-protein kinase At3g01300; Probable serine/threonine-protein kinase RLCKVII; Putative rece…
Cs9g15820	Putative serine esterase type enzyme with an alpha/beta hydrolase fold-containing protein
Cs9g15850	Putative ribonuclease H protein At1g65750; Transposon TX1 uncharacterized 149 kDa protein; Uncharacterized mitochondrial protein AtMg00310;RNA-directed DNA polymerase (Reverse transcriptase); Polynucleotidyl transferase, Ribonuclease H fold
Cs9g15860	RNA-directed DNA polymerase homolog; Transposon Ty3-I Gag-Pol polyprotein; Retrovirus-related Pol polyprotein from transposon 17.6; Retrotransposable element Tf2 155 kDa protein type 1; Retrovirus-related Pol polyprotein from transposon opus; Retrovirus-related Pol polyprotein from transposon gypsy; Enzymatic polyprotein; Genome polyprotein; Polyprotein P3; Uncharacterized protein K02A2.6;RNA-dir…
Cs9g17760	Predicted protein
Cs9g18020	Probable protein phosphatase 2C 8; Protein phosphatase 2C 3; Protein phosphatase 2C homolog 3; Integrin-linked kinase-associated serine/threonine phosphatase 2C;Putative uncharacterized protein Sb03g029890
Cs9g18740	Leucine-rich repeat receptor protein kinase exs, putative;Receptor-like protein 12; LRR receptor-like serine/threonine-protein kinase FLS2; Probable leucine-rich repeat receptor-like protein kinase At5g63930; Systemin receptor SR160; Receptor-like protein kinase 2; Brassinosteroid LRR receptor kinase; Probable LRR receptor-like serine/threonine-protein kinase At4g08850; Leucine-rich repeat recept…
Cs9g03780	Putative uncharacterized protein AT4g16060
Cs9g04180	Bidirectional sugar transporter SWEET17; Putative bidirectional sugar transporter SWEET7e;Putative uncharacterized protein Sb01g035840
Cs9g01440	Ubiquitin carboxyl-terminal hydrolase 12; MATH domain-containing protein At5g43560;Putative uncharacterized protein At4g09770/F17A8_120
Cs9g01460	Putative uncharacterized protein (Fragment)
Cs9g05240
Cs9g05310	Putative uncharacterized protein OJ1174_H11.9
Cs9g06070	Putative uncharacterized protein Sb09g019540
Cs9g06450	Probable carboxylesterase 2; Carboxylesterase 1; Gibberellin receptor GID1A; Arylacetamide deacetylase-like 2;Putative uncharacterized protein Sb10g007228
Cs9g07700	Transmembrane emp24 domain-containing protein A; Transmembrane emp24 domain-containing protein B; Transmembrane emp24 domain-containing protein 2; Transmembrane emp24 domain-containing protein 2 (Fragment); Endosomal protein P24B;Emp24/gp25L/p24 family/GOLD domain-containing protein
Cs9g08270	Ankyrin repeat-containing protein At5g02620; Ankyrin-1; Serine/threonine-protein phosphatase 6 regulatory ankyrin repeat subunit C; Alpha-latrocrustotoxin-Lt1a (Fragment); Alpha-latroinsectotoxin-Lt1a (Fragment); Death-associated protein kinase 1; Ankyrin repeat and SAM domain-containing protein 1A; Protein fem-1 homolog A; Nuclear factor NF-kappa-B p105 subunit; Ankyrin repeat domain-containing …
Cs9g08320	Putative non-LTR retroelement reverse transcriptase;Uncharacterized mitochondrial protein AtMg01250; Retrovirus-related Pol polyprotein from type-1 retrotransposable element R2 (Fragment)
Cs9g08380	Ankyrin repeat-containing protein At5g02620; Ankyrin-2; Death-associated protein kinase 1; Ankyrin-1; Nuclear factor NF-kappa-B p105 subunit (Fragment); Nuclear factor NF-kappa-B p105 subunit; Ankyrin repeat domain-containing protein 50; Ankyrin repeat and protein kinase domain-containing protein 1; Ankyrin repeat and SAM domain-containing protein 1A; Alpha-latrotoxin-Lt1a; Serine/threonine-prote…
Cs9g08600	Double strand break repair protein, putative, expressed;DNA repair protein XRCC4
Cs9g09050	2-oxoglutarate (2OG) and Fe(II)-dependent oxygenase-like protein;1-aminocyclopropane-1-carboxylate oxidase homolog 1; Deacetoxyvindoline 4-hydroxylase; Probable 2-oxoacid dependent dioxygenase; Flavonol synthase/flavanone 3-hydroxylase; Leucoanthocyanidin dioxygenase; Protein SRG1; Naringenin,2-oxoglutarate 3-dioxygenase; Naringenin,2-oxoglutarate 3-dioxygenase (Fragment); Probable 2-oxoglutarate…
Cs9g09060	2-oxoglutarate (2OG) and Fe(II)-dependent oxygenase-like protein;Deacetoxyvindoline 4-hydroxylase; 1-aminocyclopropane-1-carboxylate oxidase homolog 11; Probable 2-oxoacid dependent dioxygenase; Probable 2-oxoglutarate/Fe(II)-dependent dioxygenase; Codeine O-demethylase; Thebaine 6-O-demethylase; Naringenin,2-oxoglutarate 3-dioxygenase (Fragment); Naringenin,2-oxoglutarate 3-dioxygenase; 1-aminoc…
Cs9g09210	Pentatricopeptide repeat-containing protein, putative;Pentatricopeptide repeat-containing protein At4g33170; Putative pentatricopeptide repeat-containing protein At1g68930; Pentatricopeptide repeat-containing protein At2g03880, mitochondrial; Putative pentatricopeptide repeat-containing protein At3g13770, mitochondrial; Pentatricopeptide repeat-containing protein At3g49170, chloroplastic
Cs9g09350	Protein FAR1-RELATED SEQUENCE 5; Protein FAR-RED IMPAIRED RESPONSE 1; Protein FAR-RED ELONGATED HYPOCOTYL 3;Putative uncharacterized protein Sb01g001615 (Fragment)
Cs9g09390	Putative uncharacterized protein Sb06g022313 (Fragment)
Cs9g09430	Putative uncharacterized protein Sb01g009900;Peptide transporter PTR3-A; Probable peptide/nitrate transporter At2g40460; Putative peptide/nitrate transporter At2g37900; Probable nitrite transporter At1g68570; Nitrate transporter 1.1; Probable peptide transporter At1g52190; Probable nitrate excretion transporter 5; Putative nitrate excretion transporter 7
Cs9g09570	Cyclopropane-fatty-acyl-phospholipid synthase; Probable fatty acid methyltransferase; Cyclopropane mycolic acid synthase MmaA2; 3-demethylubiquinone-9 3-methyltransferase; Sterol 24-C-methyltransferase;2-heptaprenyl-1,4-naphthoquinone methyltransferase, putative
Cs9g09580	Putative rice retrotransposon retrofit gag/pol polyprotein;Retrovirus-related Pol polyprotein from transposon TNT 1-94; Copia protein; Uncharacterized mitochondrial protein AtMg00820; Transposon Ty4-H Gag-Pol polyprotein
Cs9g10800	Putative non-LTR retroelement reverse transcriptase;Uncharacterized mitochondrial protein AtMg01250; Retrovirus-related Pol polyprotein from type-1 retrotransposable element R2 (Fragment)
Cs9g10960	Retrotransposon protein, putative, Ty1-copia sub-class;Retrovirus-related Pol polyprotein from transposon TNT 1-94; Copia protein
Cs9g10970	Leucine-rich repeat family protein / protein kinase family protein;Probable leucine-rich repeat receptor-like protein kinase At1g35710; Probable LRR receptor-like serine/threonine-protein kinase At4g08850; LRR receptor-like serine/threonine-protein kinase GSO1; Leucine-rich repeat receptor-like serine/threonine-protein kinase At1g17230; Receptor-like protein kinase 2; Leucine-rich repeat receptor…
Cs9g11070	Putative uncharacterized protein
Cs9g11330	Putative uncharacterized protein (Fragment)
Cs9g11440	Isoflavone 7-O-methyltransferase; Isoflavone-7-O-methyltransferase 9; 8-hydroxyquercetin 8-O-methyltransferase; 6a-hydroxymaackiain methyltransferase 1; Eugenol O-methyltransferase; Chavicol O-methyltransferase; (RS)-norcoclaurine 6-O-methyltransferase; Tabersonine 16-O-methyltransferase; Myricetin O-methyltransferase; O-methyltransferase ZRP4; 5-pentadecatrienyl resorcinol O-methyltransferase; 3…
Cs9g11620
Cs9g11770	Pro-Pol polyprotein; Pol polyprotein; Retrovirus-related Pol polyprotein from transposon 17.6; Gag-Pol polyprotein; Pol polyprotein (Fragment); Uncharacterized mitochondrial protein AtMg00750; Gag-Pol polyprotein (Fragment); Retrovirus-related Pol polyprotein from transposon opus; Retrovirus-related Pol polyprotein from transposon gypsy; Uncharacterized protein K02A2.6; Enzymatic polyprotein;Puta…
Cs9g11780
orange1.1t00833	Putative uncharacterized protein;Gag-Pol polyprotein; Pol polyprotein; Pol polyprotein (Fragment); Gag-Pol polyprotein (Fragment); Pro-Pol polyprotein; HERV-K_5q33.3 provirus ancestral Pol protein; HERV-K_3q27.3 provirus ancestral Pol protein; HERV-K_1q22 provirus ancestral Pol protein; HERV-K_19p13.11 provirus ancestral Pol protein; HERV-K_8p23.1 provirus ancestral Pol protein; HERV-K_7p22.1 pro…
orange1.1t00838	(RS)-norcoclaurine 6-O-methyltransferase; 3'-hydroxy-N-methyl-(S)-coclaurine 4'-O-methyltransferase; Quercetin 3-O-methyltransferase 1; Tabersonine 16-O-methyltransferase; Chavicol O-methyltransferase; 8-hydroxyquercetin 8-O-methyltransferase; Caffeic acid 3-O-methyltransferase; Isoflavone 4'-O-methyltransferase; Bergaptol O-methyltransferase; (Iso)eugenol O-methyltransferase; Myricetin O-methylt…
orange1.1t00846	Putative uncharacterized protein (Fragment)
orange1.1t00848	Integrase, catalytic region; Zinc finger, CCHC-type; Peptidase aspartic, catalytic;Copia protein; Retrovirus-related Pol polyprotein from transposon TNT 1-94; Uncharacterized mitochondrial protein AtMg00820; Transposon Ty4-H Gag-Pol polyprotein
orange1.1t00060	Basic leucine zipper transcription factor-like protein;Transcription factor RF2b; Probable transcription factor PosF21
orange1.1t00863	Putative uncharacterized protein;Genome polyprotein
orange1.1t00865
orange1.1t00871	Genome polyprotein; Enzymatic polyprotein; Retrotransposable element Tf2 155 kDa protein type 2; Putative enzymatic polyprotein; Polyprotein P3;Retrotransposon protein, putative, Ty3-gypsy sub-class (Fragment)
orange1.1t00881
orange1.1t00889	Putative uncharacterized protein;Genome polyprotein
orange1.1t00891	Retrotransposon protein, putative, Ty1-copia subclass;Retrovirus-related Pol polyprotein from transposon TNT 1-94; Copia protein; Uncharacterized mitochondrial protein AtMg00820; Transposon Ty2-B Gag-Pol polyprotein
orange1.1t00895	Non-LTR retrolelement reverse transcriptase-like protein
orange1.1t00896	Putative ribonuclease H protein At1g65750; Uncharacterized mitochondrial protein AtMg00310;LINE-type retrotransposon LIb DNA, complete sequence, Insertion at the SCL6 site
orange1.1t00070	Uncharacterized mitochondrial protein AtMg00310; Retrovirus-related Pol polyprotein from type-1 retrotransposable element R2 (Fragment);Putative non-LTR retroelement reverse transcriptase
orange1.1t00908	Genome polyprotein; Enzymatic polyprotein;Putative uncharacterized protein Sb06g013680
orange1.1t00915	Predicted protein
orange1.1t00919
orange1.1t00951
orange1.1t00076	Uncharacterized mitochondrial protein AtMg00310;Putative non-LTR retroelement reverse transcriptase
orange1.1t00960	Retrotransposon protein, putative, Ty3-gypsy subclass;Genome polyprotein; Enzymatic polyprotein; Polyprotein P3; Retrovirus-related Pol polyprotein from transposon 412; Retrovirus-related Pol polyprotein from transposon opus; RNA-directed DNA polymerase homolog; Gag-Pro-Pol polyprotein; Pol polyprotein
orange1.1t00972	Genome polyprotein; Enzymatic polyprotein; Putative enzymatic polyprotein; Retrovirus-related Pol polyprotein from transposon 17.6; Polyprotein P3; Pro-Pol polyprotein;Putative polyprotein (Aspartic proteinase, reverse transcriptase, ribonuclease H)
orange1.1t00988	Predicted protein
orange1.1t01003	HAT family dimerisation domain containing protein, expressed;Putative AC transposase; Putative AC9 transposase
orange1.1t01011
orange1.1t01020
orange1.1t01024	Predicted protein
orange1.1t05842
orange1.1t01066	Transposon protein, putative, CACTA, En/Spm sub-class
orange1.1t01075	Predicted protein
orange1.1t01078	Putative uncharacterized protein (Fragment)
orange1.1t01121	Cytokinin riboside 5'-monophosphate phosphoribohydrolase;Cytokinin riboside 5'-monophosphate phosphoribohydrolase LOG7; Probable cytokinin riboside 5'-monophosphate phosphoribohydrolase LOGL6; Cytokinin riboside 5'-monophosphate phosphoribohydrolase LOG; LOG family protein PA4923; LOG family protein ORF6 in fasciation locus
orange1.1t01125	Putative uncharacterized protein Sb03g000390;Genome polyprotein; Movement protein
orange1.1t01169
orange1.1t01209	Putative uncharacterized protein Sb03g000390;Genome polyprotein; Movement protein
orange1.1t01210	Putative uncharacterized protein Sb03g000390;Genome polyprotein; Movement protein
orange1.1t01221	Genome polyprotein;Predicted protein
orange1.1t01234	Putative uncharacterized protein;Retrovirus-related Pol polyprotein from transposon 17.6; Retrovirus-related Pol polyprotein from transposon opus; Retrotransposable element Tf2 155 kDa protein type 1
orange1.1t01238	Putative uncharacterized protein
orange1.1t01254	Uncharacterized mitochondrial protein AtMg00310;Putative uncharacterized protein Sb05g019526 (Fragment)
orange1.1t01260	Putative uncharacterized protein Sb10g000430
orange1.1t01295	Retrovirus-related Pol polyprotein from transposon TNT 1-94; Copia protein; Uncharacterized mitochondrial protein AtMg00820;Putative uncharacterized protein (Fragment)
orange1.1t01339	Homogentisate phytyltransferase 1, chloroplastic; Probable homogentisate phytyltransferase 1, chloroplastic; Bacteriochlorophyll synthase 33 kDa chain; Digeranylgeranylglyceryl phosphate synthase;Putative homogentisic acid geranylgeranyl transferase
orange1.1t01347
orange1.1t01350	Transposon protein, putative, CACTA, En/Spm sub-class
orange1.1t01354	Protein FAR1-RELATED SEQUENCE 6; Protein FAR-RED IMPAIRED RESPONSE 1; Protein FAR-RED ELONGATED HYPOCOTYL 3;Putative uncharacterized protein Sb01g001615 (Fragment)
orange1.1t01375	Eukaryotic translation initiation factor 3 subunit (EIF-3)-like;Protein KIAA0664 homolog; Kinesin light chain 4
orange1.1t01377	Eukaryotic translation initiation factor 3 subunit, putative;Protein KIAA0664 homolog; Protein KIAA0664
orange1.1t01378	LRR receptor-like serine/threonine-protein kinase GSO1; Brassinosteroid LRR receptor kinase; Systemin receptor SR160; Receptor-like protein kinase BRI1-like 3; Leucine-rich repeat receptor-like protein kinase PEPR2; Probably inactive leucine-rich repeat receptor-like protein kinase At3g28040; Tyrosine-sulfated glycopeptide receptor 1; Leucine-rich repeat receptor-like serine/threonine-protein kin…
orange1.1t01379	Endonuclease/exonuclease/phosphatase
orange1.1t01381	Protein KIAA0664 homolog; Kinesin light chain;Eukaryotic translation initiation factor 3 subunit (EIF-3)-like
orange1.1t01385	LRR receptor-like serine/threonine-protein kinase GSO1; Leucine-rich repeat receptor protein kinase EXS; Brassinosteroid LRR receptor kinase; Systemin receptor SR160; Receptor-like protein 12; Protein BRASSINOSTEROID INSENSITIVE 1; Serine/threonine-protein kinase BRI1-like 2; Receptor-like protein kinase BRI1-like 3; Probable LRR receptor-like serine/threonine-protein kinase At4g36180; Leucine-ri…
orange1.1t01390	Phytosulfokine receptor 2; LRR receptor-like serine/threonine-protein kinase ERL2; Probable leucine-rich repeat receptor-like protein kinase At1g35710; Leucine-rich repeat receptor-like protein kinase PEPR2; LRR receptor-like serine/threonine-protein kinase ERECTA; Probably inactive leucine-rich repeat receptor-like protein kinase At3g28040; Leucine-rich repeat receptor-like protein kinase TDR; P…
orange1.1t01394	LRR receptor-like serine/threonine-protein kinase GSO1; Protein BRASSINOSTEROID INSENSITIVE 1; Systemin receptor SR160; Brassinosteroid LRR receptor kinase; Probable leucine-rich repeat receptor-like protein kinase At2g33170; Leucine-rich repeat receptor protein kinase EXS; Leucine-rich repeat receptor-like protein kinase PEPR2; Leucine-rich repeat receptor-like serine/threonine-protein kinase At…
orange1.1t01409	Transposon protein, putative, CACTA, En/Spm sub-class
orange1.1t01415	LRR receptor-like serine/threonine-protein kinase FLS2; LRR receptor-like serine/threonine-protein kinase ERECTA; Receptor-like protein kinase 5; Probable LRR receptor-like serine/threonine-protein kinase At4g08850; Serine/threonine-protein kinase BRI1-like 2; Leucine-rich repeat receptor-like protein kinase PXL1; Receptor protein kinase CLAVATA1; Leucine-rich repeat receptor-like serine/threonin…
orange1.1t01429	COBW domain-containing protein 6; Uncharacterized protein YNR029C;Cobalamin synthesis protein/P47K family protein
orange1.1t01435	Probable disease resistance protein At1g12280; Disease resistance protein RFL1; Putative disease resistance protein At4g10780;LRR and NB-ARC domain-containing disease resistance protein
orange1.1t00116	Putative uncharacterized protein
orange1.1t01455
orange1.1t01469	Serine/threonine-protein phosphatase 6 regulatory ankyrin repeat subunit B; Receptor-interacting serine/threonine-protein kinase 4; Ankyrin repeat and protein kinase domain-containing protein 1; Ankyrin-3; Serine/threonine-protein phosphatase 6 regulatory ankyrin repeat subunit A; Transient receptor potential cation channel subfamily A member 1; Putative ankyrin repeat protein RF_0381; Caskin-1;A…
orange1.1t01472	Ankyrin-1; Ankyrin repeat-containing protein At5g02620; Poly(ADP-ribose) polymerase pme-5;Ankyrin repeat-containing protein, putative
orange1.1t01494	Poly [ADP-ribose] polymerase 2-A; Poly [ADP-ribose] polymerase 1 (Fragment); Poly(ADP-ribose) polymerase pme-1;Putative uncharacterized protein Sb03g013840
orange1.1t01561	Putative uncharacterized protein P0450E05.15-2
orange1.1t01642	Putative uncharacterized protein
orange1.1t01794	Putative disease resistance protein At4g11170; Probable WRKY transcription factor 16; TMV resistance protein N; Protein SUPPRESSOR OF npr1-1, CONSTITUTIVE 1; Protein DA1-related 4;Leucine-rich repeat containing protein, putative
orange1.1t01795	Leucine-rich repeat containing protein, putative;TMV resistance protein N; Putative disease resistance protein At4g11170; Protein SUPPRESSOR OF npr1-1, CONSTITUTIVE 1; Probable WRKY transcription factor 19; Protein DA1-related 4; Protein PHLOEM PROTEIN 2-LIKE A5; Vesicle-associated protein 1-4; Probable disease resistance protein At1g15890
orange1.1t01796	Peptide chain release factor, putative; 8726-9996;Peptide chain release factor 2
orange1.1t01802	TIR-NBS-LRR-TIR type disease resistance protein (Fragment);TMV resistance protein N; Probable WRKY transcription factor 19; Putative disease resistance protein At4g11170; Protein SUPPRESSOR OF npr1-1, CONSTITUTIVE 1; Protein DA1-related 4; Probable disease resistance protein At1g15890
orange1.1t01822	Putative TIR-NBS-LRR class disease resistance protein;TMV resistance protein N; Putative disease resistance protein At4g11170; Protein SUPPRESSOR OF npr1-1, CONSTITUTIVE 1; Probable WRKY transcription factor 19; Protein PHLOEM PROTEIN 2-LIKE A8; Vesicle-associated protein 1-4; Probable disease resistance protein At4g33300; Leucine-rich repeat and death domain-containing protein 1; Leucine-rich re…
orange1.1t01836	Putative hydrolase/acyltransferase, alpha/beta hydrolase superfamily
orange1.1t01837	Leucine-rich repeat containing protein, putative;TMV resistance protein N; Putative disease resistance protein At4g11170; Protein SUPPRESSOR OF npr1-1, CONSTITUTIVE 1; Probable WRKY transcription factor 19; Protein DA1-related 4; Protein PHLOEM PROTEIN 2-LIKE A8; Vesicle-associated protein 1-4
orange1.1t01849	18.2 kDa class I heat shock protein; 18.1 kDa class I heat shock protein (Fragment); 17.8 kDa class I heat shock protein; 17.6 kDa class I heat shock protein 3; 17.9 kDa class I heat shock protein; 17.5 kDa class I heat shock protein; 18.5 kDa class I heat shock protein; 17.3 kDa class I heat shock protein; 17.7 kDa class I heat shock protein;Cytosolic class I small heat shock protein type 2 (Fra…
orange1.1t00137	Polyprotein, cleavage products include viral coat protein and proteins with homology to an aspartic protease, reverse transcriptase and RNase H;Genome polyprotein; Enzymatic polyprotein; Putative enzymatic polyprotein; Retrotransposable element Tf2 155 kDa protein type 2; Pro-Pol polyprotein
orange1.1t01871	Selenium binding protein 1 (Predicted) (Fragment);Selenium-binding protein 2; Putative selenium-binding protein
orange1.1t01875	Transposon protein, putative, CACTA, En/Spm sub-class, expressed
orange1.1t01896	Putative uncharacterized protein
orange1.1t02086	Putative uncharacterized protein
orange1.1t02157	Putative uncharacterized protein Sb04g038150
orange1.1t02169	TMV resistance protein N; Probable WRKY transcription factor 16; Putative disease resistance protein At4g11170; Protein SUPPRESSOR OF npr1-1, CONSTITUTIVE 1; Leucine-rich repeat-containing protein 1; Probable disease resistance protein At1g61190;Putative TIR-NBS-LRR class disease resistance protein
orange1.1t02171	TIR-NBS-LRR-TIR type disease resistance protein (Fragment);Protein SUPPRESSOR OF npr1-1, CONSTITUTIVE 1; TMV resistance protein N; Putative disease resistance protein At4g11170; Probable WRKY transcription factor 19; Protein PHLOEM PROTEIN 2-LIKE A8; Vesicle-associated protein 1-4; Leucine-rich repeat-containing protein 40; Disease resistance protein RPP13
orange1.1t02191	E3 ubiquitin-protein ligase MIB1; Ankyrin repeat-containing protein C6C3.08; E3 ubiquitin-protein ligase mind-bomb;Ankyrin repeat-containing protein, putative
orange1.1t02211	HAT family dimerisation domain containing protein, expressed;Putative AC transposase; Putative AC9 transposase
orange1.1t02232	Putative copia-like retrotransposon Hopscotch polyprotein (Fragment)
orange1.1t02295
orange1.1t00163
orange1.1t02346	Putative calcium-transporting ATPase 11, plasma membrane-type; Calcium-transporting ATPase 4, plasma membrane-type; Probable calcium-transporting ATPase 5, plasma membrane-type; Calcium-transporting ATPase 1, chloroplastic; Calcium-transporting ATPase PAT1; Plasma membrane calcium-transporting ATPase 2; Plasma membrane calcium-transporting ATPase 2 (Fragment);Calcium-transporting ATPase 2, plasma…
orange1.1t02376	Putative uncharacterized protein
orange1.1t02393	Putative uncharacterized protein (Fragment)
orange1.1t02414	Putative uncharacterized protein
orange1.1t02432	Putative rice retrotransposon retrofit gag/pol polyprotein;Retrovirus-related Pol polyprotein from transposon TNT 1-94; Copia protein; Uncharacterized mitochondrial protein AtMg00810; Putative transposon Ty5-1 protein YCL074W
orange1.1t02446	Ser/Thr protein phosphatase family protein, expressed;Purple acid phosphatase 15; Probable purple acid phosphatase 20; Fe(3+)-Zn(2+) purple acid phosphatase 12; Acid phosphatase; Probable inactive purple acid phosphatase 9
orange1.1t02454	Transposon protein, putative, mutator sub-class
orange1.1t02491	F-box/FBD/LRR-repeat protein At1g16930; Putative F-box/LRR-repeat protein At3g49150; Putative F-box/FBD/LRR-repeat protein At4g00315;FBD, F-box and leucine rich repeat domain-containing protein
orange1.1t02496	Putative uncharacterized protein Sb08g002090
orange1.1t02518	Leucine-rich repeat containing protein, putative (Fragment);Putative disease resistance protein RGA3; Disease resistance protein RGA2; Probable disease resistance protein RXW24L; Polygalacturonase
orange1.1t02520	Leucine-rich repeat family protein / protein kinase family protein;Probable LRR receptor-like serine/threonine-protein kinase At4g08850; Probable leucine-rich repeat receptor-like protein kinase At1g35710; Leucine-rich repeat receptor-like serine/threonine-protein kinase At1g17230; LRR receptor-like serine/threonine-protein kinase GSO1; Leucine-rich repeat receptor protein kinase EXS; Receptor-li…
orange1.1t02640	Putative uncharacterized protein;Genome polyprotein
orange1.1t02643	Protease, reverse transcriptase, ribonuclease H, integrase (Precursor);Genome polyprotein; Enzymatic polyprotein; Retrovirus-related Pol polyprotein from transposon 297; Polyprotein P3
orange1.1t02702	Putative uncharacterized protein;Genome polyprotein
orange1.1t02711
orange1.1t02712
orange1.1t02713	Receptor-like protein kinase FERONIA; Putative receptor-like protein kinase At5g39000; Receptor-like protein kinase ANXUR2; Probable receptor-like protein kinase At5g38990; Receptor-like protein kinase THESEUS 1; Receptor-like protein kinase HERK 1; Probable LRR receptor-like serine/threonine-protein kinase At2g28960; Serine/threonine-protein kinase At3g07070; Nodulation receptor kinase; Leucine-…
orange1.1t02720
orange1.1t02740	Putative uncharacterized protein (Fragment)
orange1.1t02779	LINE-type retrotransposon LIb DNA, complete sequence, Insertion at the S10 site
orange1.1t02848	Disease resistance protein RFL1; Probable disease resistance protein At1g12290; Putative disease resistance protein At1g63350;Putative citrus disease resistance protein 16R1-19 (Fragment)
orange1.1t02850	Putative ubiquitin conjugating enzyme 7 interacting protein 4;Probable E3 ubiquitin-protein ligase RNF217
orange1.1t02866
orange1.1t02907	Putative non-LTR retroelement reverse transcriptase
orange1.1t02916	Putative uncharacterized protein
orange1.1t02918	LRR receptor-like serine/threonine-protein kinase GSO1; Receptor-like protein kinase 2; Receptor-like protein 12; Phytosulfokine receptor 1; LRR receptor-like serine/threonine-protein kinase ERECTA; Leucine-rich repeat receptor-like serine/threonine-protein kinase BAM2; Leucine-rich repeat receptor protein kinase EXS; Probable LRR receptor-like serine/threonine-protein kinase At4g36180; Probably …
orange1.1t02919	Putative uncharacterized protein
orange1.1t02926	Probably inactive leucine-rich repeat receptor-like protein kinase At3g28040; Protein BRASSINOSTEROID INSENSITIVE 1; LRR receptor-like serine/threonine-protein kinase RCH1; Leucine-rich repeat receptor protein kinase EXS; Receptor-like protein kinase 2; Receptor-like protein 12; Leucine-rich repeat receptor-like serine/threonine-protein kinase At1g17230; LRR receptor-like serine/threonine-protein…
orange1.1t02927	Leucine-rich repeat receptor protein kinase exs, putative;Receptor-like protein 12; Protein BRASSINOSTEROID INSENSITIVE 1; Probably inactive leucine-rich repeat receptor-like protein kinase IMK2; Receptor-like protein kinase 2; Probable LRR receptor-like serine/threonine-protein kinase At1g12460; LRR receptor-like serine/threonine-protein kinase GSO1; DNA-damage-repair/toleration protein DRT100; …
orange1.1t02940	Putative uncharacterized protein
orange1.1t02961
orange1.1t02963	Genome polyprotein;Predicted protein
orange1.1t02964	Putative uncharacterized protein
orange1.1t02972	Putative uncharacterized protein (Fragment)
orange1.1t02983	Transposon protein, putative, CACTA, En/Spm sub-class
orange1.1t02998	Retrovirus-related Pol polyprotein from transposon opus; Retrovirus-related Pol polyprotein from transposon 17.6; Retrotransposable element Tf2 155 kDa protein type 1; Retrovirus-related Pol polyprotein from transposon gypsy; Transposon Ty3-I Gag-Pol polyprotein; Uncharacterized mitochondrial protein AtMg00860; Gag-Pol polyprotein;Retroelement pol polyprotein-like
orange1.1t02999	LINE-type retrotransposon LIb DNA, complete sequence, Insertion at the S10 site
orange1.1t03006
orange1.1t03077	50S ribosomal protein L9;Ribosomal protein L9, N-terminal domain containing protein
orange1.1t03079	Probable LRR receptor-like serine/threonine-protein kinase At3g47570; Putative receptor-like protein kinase At3g47110; LRR receptor-like serine/threonine-protein kinase EFR; Putative leucine-rich repeat receptor-like serine/threonine-protein kinase At2g24130; LRR receptor-like serine/threonine-protein kinase FLS2; Receptor-like protein kinase HSL1; Probable leucine-rich repeat receptor-like prote…
orange1.1t03089	Putative receptor-like protein kinase At3g47110; Probable LRR receptor-like serine/threonine-protein kinase At3g47570; Receptor-like protein kinase 2; Leucine-rich repeat receptor protein kinase EXS; LRR receptor-like serine/threonine-protein kinase FLS2; Probable leucine-rich repeat receptor-like protein kinase At1g35710; Leucine-rich repeat receptor-like protein kinase PXL2; Leucine-rich repeat…
orange1.1t03092	Probable LRR receptor-like serine/threonine-protein kinase At3g47570; LRR receptor-like serine/threonine-protein kinase EFR; Putative receptor-like protein kinase At3g47110; Putative leucine-rich repeat receptor-like serine/threonine-protein kinase At2g24130; LRR receptor-like serine/threonine-protein kinase FLS2; Receptor-like protein kinase HSL1; Leucine-rich repeat receptor-like protein kinase…
orange1.1t03102	Probable LRR receptor-like serine/threonine-protein kinase At3g47570; LRR receptor-like serine/threonine-protein kinase EFR; Probable leucine-rich repeat receptor-like protein kinase At2g33170; LRR receptor-like serine/threonine-protein kinase FLS2; Putative receptor-like protein kinase At3g47110; Leucine-rich repeat receptor-like serine/threonine-protein kinase At1g17230; Receptor-like protein k…
orange1.1t03126	Probable disease resistance protein At1g52660; Putative disease resistance protein At3g15700;Disease resistance protein RFL1, putative
orange1.1t03136	Pleckstriny domain-containing protein, putative, expressed
orange1.1t03192
orange1.1t03207	Uncharacterized mitochondrial protein AtMg00310;Putative reverse transcriptase/RNA-dependent DNA polymerase
orange1.1t03239	Putative uncharacterized protein Sb04g028630;RNA-dependent RNA polymerase 1; Probable RNA-dependent RNA polymerase 1
orange1.1t03306
orange1.1t03310	Putative uncharacterized protein (Fragment)
orange1.1t03375
orange1.1t03394	Putative uncharacterized protein
orange1.1t03406	Wall-associated receptor kinase 2; Wall-associated receptor kinase-like 2; Putative wall-associated receptor kinase-like 13; Probable LRR receptor-like serine/threonine-protein kinase At5g48740; Cysteine-rich receptor-like protein kinase 3; Receptor-like protein kinase ANXUR1; Serine/threonine-protein kinase-like protein ACR4; Probable receptor-like protein kinase At3g17420; Receptor-like protein…
orange1.1t03437	Ankyrin repeat-containing protein, putative
orange1.1t03442	Putative uncharacterized protein
orange1.1t03471	Putative uncharacterized protein Sb06g022160
orange1.1t03488
orange1.1t03497	Putative Mutator-like transposase, 3' partial (Fragment)
orange1.1t03499	Genome polyprotein; Enzymatic polyprotein; Putative enzymatic polyprotein; Transposon Ty3-G Gag-Pol polyprotein; Retrovirus-related Pol polyprotein from transposon gypsy; Retrovirus-related Pol polyprotein from transposon 17.6; Retrovirus-related Pol polyprotein from transposon opus; Polyprotein P3; Retrotransposable element Tf2 155 kDa protein type 2; Pro-Pol polyprotein; Gag-Pro-Pol polyprotein…
orange1.1t03524	Leucine-rich repeat containing protein, putative;TMV resistance protein N; Putative disease resistance protein At4g11170; Protein SUPPRESSOR OF npr1-1, CONSTITUTIVE 1; Probable WRKY transcription factor 19; Protein DA1-related 4; Protein PHLOEM PROTEIN 2-LIKE A8; Vesicle-associated protein 1-4; Probable disease resistance protein At5g43730
orange1.1t03528	Pumilio homolog 12; Putative pumilio homolog 8, chloroplastic; Putative pumilio homolog 21;Putative uncharacterized protein Sb05g022550
orange1.1t03566	Putative uncharacterized protein;Retrovirus-related Pol polyprotein from transposon opus; Transposon Ty3-I Gag-Pol polyprotein; Retrovirus-related Pol polyprotein from transposon 17.6; Retrovirus-related Pol polyprotein from transposon gypsy; RNA-directed DNA polymerase homolog; Enzymatic polyprotein; Uncharacterized mitochondrial protein AtMg00860
orange1.1t03620	Nitrate transporter, H+/oligopeptide symporter POT family (Fragment)
orange1.1t03625	Nitrate transporter 1.3;Oligopeptide transporter, putative
orange1.1t03627	MATE efflux family protein 8; Uncharacterized transporter YDR338C;Putative uncharacterized protein Sb01g045100
orange1.1t03633
orange1.1t03640	Disease resistance protein RGA2; Putative disease resistance protein RGA4; Probable disease resistance protein At4g27220; Putative inactive disease susceptibility protein LOV1;Leucine-rich repeat containing protein, putative
orange1.1t03651	Novel protein similar to vertebrate squamous cell carcinoma antigen recognised by T cells 3 (SART3)
orange1.1t03694	Putative disease resistance protein At4g11170; TMV resistance protein N; Protein SUPPRESSOR OF npr1-1, CONSTITUTIVE 1; Probable WRKY transcription factor 16; Protein DA1-related 4; Protein PHLOEM PROTEIN 2-LIKE A8; Vesicle-associated protein 1-4;TIR-NBS-LRR-TIR type disease resistance protein (Fragment)
orange1.1t03704	Probable disease resistance protein At1g52660; Putative disease resistance protein At3g15700;Disease resistance protein RFL1, putative
orange1.1t03709	Regulatory protein AfsR;Disease resistance protein RFL1, putative
orange1.1t03712	Disease resistance protein At4g27190; Probable disease resistance protein At4g14610; Putative disease resistance protein At3g15700;Disease resistance protein RFL1, putative
orange1.1t03732	Putative disease resistance protein RGA3; Disease resistance protein RGA2; Putative inactive disease susceptibility protein LOV1;Leucine-rich repeat containing protein, putative
orange1.1t03734	Leucine-rich repeat containing protein, putative;Disease resistance protein RGA2; Putative disease resistance RPP13-like protein 1; Probable disease resistance protein At1g58390; Inactive disease susceptibility protein LOV1; Disease susceptibility protein LOV1; Putative inactive disease susceptibility protein LOV1
orange1.1t03808	Pollen-specific leucine-rich repeat extensin-like protein 1; Leucine-rich repeat extensin-like protein 5; Uncharacterized protein At4g06744; LRR receptor-like serine/threonine-protein kinase GSO1; Leucine-rich repeat receptor-like protein kinase PXL1; Probable LRR receptor-like serine/threonine-protein kinase At4g26540; Probably inactive leucine-rich repeat receptor-like protein kinase IMK2; Rece…
orange1.1t03817	Putative uncharacterized protein
orange1.1t03841	LRR receptor-like serine/threonine-protein kinase EFR; Probable LRR receptor-like serine/threonine-protein kinase At3g47570; LRR receptor-like serine/threonine-protein kinase FLS2; Putative receptor-like protein kinase At3g47110; Probable leucine-rich repeat receptor-like protein kinase At5g63930; Leucine-rich repeat receptor-like serine/threonine-protein kinase At1g17230; Receptor-like protein k…
orange1.1t03845	Leucine-rich repeat family protein / protein kinase family protein;Probable LRR receptor-like serine/threonine-protein kinase At4g08850; Probable leucine-rich repeat receptor-like protein kinase At1g35710; Leucine-rich repeat receptor-like serine/threonine-protein kinase At1g17230; Receptor-like protein kinase 2; LRR receptor-like serine/threonine-protein kinase GSO1; Leucine-rich repeat receptor…
orange1.1t03847	Very similar to retrotransposon reverse transcriptase;Uncharacterized mitochondrial protein AtMg00310; Putative ribonuclease H protein At1g65750
orange1.1t03854	Putative uncharacterized protein (Fragment)
orange1.1t03863	Putative translation initiation factor EIF-2B beta subunit, 3' partial (Fragment);Translation initiation factor eIF-2B subunit beta
orange1.1t06022	NAD-dependent sorbitol dehydrogenase;L-idonate 5-dehydrogenase
orange1.1t03939	LINE-type retrotransposon LIb DNA, complete sequence, Insertion at the S10 site
orange1.1t03957
orange1.1t03960	Probable LRR receptor-like serine/threonine-protein kinase At4g08850; Probable leucine-rich repeat receptor-like protein kinase At1g35710; Leucine-rich repeat receptor-like serine/threonine-protein kinase At1g17230; Receptor-like protein kinase 2; LRR receptor-like serine/threonine-protein kinase GSO2; Leucine-rich repeat receptor-like protein kinase TDR; Leucine-rich repeat receptor protein kina…
orange1.1t03963	Leucine-rich repeat family protein / protein kinase family protein;Probable LRR receptor-like serine/threonine-protein kinase At4g08850; Probable leucine-rich repeat receptor-like protein kinase At1g35710; Leucine-rich repeat receptor-like serine/threonine-protein kinase At1g17230; LRR receptor-like serine/threonine-protein kinase GSO2; Receptor-like protein kinase 2; Leucine-rich repeat receptor…
orange1.1t00501	Uncharacterized protein KIAA1530;Putative uncharacterized protein Sb10g001850
orange1.1t03989	Putative ATPDIL1-4 electron transporter (Fragment);Protein disulfide isomerase-like 1-3; Protein disulfide-isomerase; Dolichyl-diphosphooligosaccharide--protein glycotransferase; Putative protein disulfide-isomerase C1F5.02; Probable protein disulfide-isomerase A4
orange1.1t04012	Putative uncharacterized protein Sb03g037190
orange1.1t04017	Metallothionein-like protein MT2B;Metallothionein-like protein 2
orange1.1t04065	2-oxoglutarate-Fe(II)-dependent oxygenase domain-containing protein
orange1.1t04082	Probable disease resistance protein At1g61300;Late blight resistance protein R1-A, putative
orange1.1t04084	Putative uncharacterized protein Sb09g004320;Importin subunit alpha-1a; Importin subunit alpha; Importin subunit alpha-B; Probable importin subunit alpha-A
orange1.1t04085
orange1.1t04087
orange1.1t04092	Protein FAR1-RELATED SEQUENCE 5; Protein FAR-RED IMPAIRED RESPONSE 1;Transposon protein, putative, unclassified, expressed
orange1.1t04106	Predicted protein (Fragment)
orange1.1t04127	Putative pentatricopeptide repeat-containing protein At1g12700, mitochondrial; Pentatricopeptide repeat-containing protein At1g12300, mitochondrial; Pentatricopeptide repeat-containing protein At1g12620; Pentatricopeptide repeat-containing protein At1g62930, chloroplastic; Protein Rf1, mitochondrial; Putative pentatricopeptide repeat-containing protein At1g74580;Helicase domain and pentatricopept…
orange1.1t04147
orange1.1t04159	Lipase class 3 family protein / putative calmodulin-binding heat-shock protein
orange1.1t04162	Genome polyprotein; Movement protein;Putative uncharacterized protein OSJNBa0025J22.29
orange1.1t04181	Putative rice retrotransposon retrofit gag/pol polyprotein;Retrovirus-related Pol polyprotein from transposon TNT 1-94; Copia protein; Uncharacterized mitochondrial protein AtMg00810; Putative transposon Ty5-1 protein YCL074W
orange1.1t04193	Anthranilate N-methyltransferase; Caffeic acid 3-O-methyltransferase 1; Quercetin 3-O-methyltransferase 1; Tricetin 3',4',5'-O-trimethyltransferase; Bergaptol O-methyltransferase; (Iso)eugenol O-methyltransferase; Inositol 4-methyltransferase; Isoliquiritigenin 2'-O-methyltransferase; (S)-scoulerine 9-O-methyltransferase; Flavone O-methyltransferase 1; Caffeic acid 3-O-methyltransferase (Fragment…
orange1.1t04231
orange1.1t04240	Putative uncharacterized protein (Fragment)
orange1.1t04260
orange1.1t04264	Retrotransposon protein, putative, Ty3-gypsy subclass;Genome polyprotein; Enzymatic polyprotein; Retrotransposable element Tf2 155 kDa protein type 2; Retrovirus-related Pol polyprotein from transposon 17.6
orange1.1t04274	Galactoside 2-alpha-L-fucosyltransferase; Fucosyltransferase 2; Probable fucosyltransferase 7; Putative fucosyltransferase 10;Galactoside 2-alpha-L-fucosyltransferase, putative
orange1.1t04290	TMV resistance protein N, putative
orange1.1t04291	Putative TIR-NBS-LRR class disease resistance protein;Putative disease resistance protein At4g11170; TMV resistance protein N; Protein SUPPRESSOR OF npr1-1, CONSTITUTIVE 1; Probable WRKY transcription factor 16; Protein DA1-related 4; Protein PHLOEM PROTEIN 2-LIKE A5; Vesicle-associated protein 1-4
orange1.1t04292	Leucine-rich repeat containing protein, putative;TMV resistance protein N; Putative disease resistance protein At4g11170; Protein SUPPRESSOR OF npr1-1, CONSTITUTIVE 1; Probable WRKY transcription factor 16; Protein DA1-related 4; Protein PHLOEM PROTEIN 2-LIKE A5; Vesicle-associated protein 1-4; Probable disease resistance protein At5g63020; Disease resistance protein RPS5
orange1.1t04296	Putative disease resistance protein At4g11170; TMV resistance protein N; Protein SUPPRESSOR OF npr1-1, CONSTITUTIVE 1; Probable WRKY transcription factor 16; Protein DA1-related 4; Protein PHLOEM PROTEIN 2-LIKE A8; Vesicle-associated protein 1-4;TIR-NBS-LRR-TIR type disease resistance protein (Fragment)
orange1.1t04301	Leucine-rich repeat containing protein, putative;Putative disease resistance protein At4g11170; TMV resistance protein N; Protein SUPPRESSOR OF npr1-1, CONSTITUTIVE 1; Probable WRKY transcription factor 19; Protein DA1-related 4; Protein PHLOEM PROTEIN 2-LIKE A5; Vesicle-associated protein 1-4
orange1.1t04306	PML-RARA-regulated adapter molecule 1;Putative uncharacterized protein (Fragment)
orange1.1t04307	Putative uncharacterized protein Sb03g000390;Genome polyprotein; Movement protein
orange1.1t04309	Putative rice retrotransposon retrofit gag/pol polyprotein;Retrovirus-related Pol polyprotein from transposon TNT 1-94; Copia protein; Uncharacterized mitochondrial protein AtMg00810; Putative transposon Ty5-1 protein YCL074W
orange1.1t04340	Putative uncharacterized protein Sb01g014370;B3 domain-containing transcription factor VRN1; B3 domain-containing protein At4g01580; Putative B3 domain-containing protein Os03g0619850
orange1.1t04342	Putative uncharacterized protein Sb10g005070
orange1.1t04366	(R)-limonene synthase 1; Myrcene synthase, chloroplastic; (+)-alpha-pinene synthase, chloroplastic; (-)-limonene synthase, chloroplastic; Isoprene synthase, chloroplastic; Beta-myrcene synthase, chloroplastic; Terpinolene synthase, chloroplastic; R-linalool synthase QH1, chloroplastic (Fragment); Alpha-zingiberene synthase; (+)-sabinene synthase, chloroplastic; 1,8-cineole synthase, chloroplastic…
orange1.1t04388	Isoflavone-7-O-methyltransferase 9; Isoflavone 7-O-methyltransferase; Probable O-methyltransferase 2; 6a-hydroxymaackiain methyltransferase 1; 8-hydroxyquercetin 8-O-methyltransferase; Tabersonine 16-O-methyltransferase; (RS)-norcoclaurine 6-O-methyltransferase; 3'-hydroxy-N-methyl-(S)-coclaurine 4'-O-methyltransferase; O-methyltransferase ZRP4; 5-pentadecatrienyl resorcinol O-methyltransferase;P…
orange1.1t04412	Leucine-rich repeat family protein / protein kinase family protein;Probable LRR receptor-like serine/threonine-protein kinase At4g08850; Probable leucine-rich repeat receptor-like protein kinase At1g35710; Leucine-rich repeat receptor-like serine/threonine-protein kinase At1g17230; LRR receptor-like serine/threonine-protein kinase GSO2; Receptor-like protein kinase 2; Leucine-rich repeat receptor…
orange1.1t04416	Probable leucine-rich repeat receptor-like protein kinase At1g35710; Probable LRR receptor-like serine/threonine-protein kinase At4g08850; Receptor-like protein kinase HSL1; LRR receptor-like serine/threonine-protein kinase ERL1; Phytosulfokine receptor 2; LRR receptor-like serine/threonine-protein kinase FEI 1; Leucine-rich repeat receptor-like serine/threonine-protein kinase At1g17230; Leucine-…
orange1.1t04421	Novel TB2/DP1, HVA22 family protein (Ortholog of human open reading frame 18, C5orf18);HVA22-like protein k; Receptor expression-enhancing protein 5; Uncharacterized protein T19C3.4; Protein YOP1; HVA22-like protein c; HVA22-like protein b; Putative HVA22-like protein g; HVA22-like protein i; HVA22-like protein f; HVA22-like protein j; Uncharacterized membrane protein C30D10.09c; HVA22-like prote…
orange1.1t04438	Integrase, catalytic region; Zinc finger, CCHC-type; Peptidase aspartic, catalytic;Copia protein; Retrovirus-related Pol polyprotein from transposon TNT 1-94; Uncharacterized mitochondrial protein AtMg00810
orange1.1t04454	Probable LRR receptor-like serine/threonine-protein kinase At3g47570; LRR receptor-like serine/threonine-protein kinase EFR; Putative receptor-like protein kinase At3g47110; Putative leucine-rich repeat receptor-like serine/threonine-protein kinase At2g24130; Leucine-rich repeat receptor-like serine/threonine-protein kinase BAM2; LRR receptor-like serine/threonine-protein kinase FLS2; Probable le…
orange1.1t04471	Disease resistance protein RGA2; Putative disease resistance protein RGA4; Leucine-rich repeat-containing protein 40; Leucine-rich repeat protein soc-2 homolog; Probable disease resistance protein At5g04720;Pollen signalling protein with adenylyl cyclase activity (Fragment)
orange1.1t04477	LINE-type retrotransposon LIb DNA, complete sequence, Insertion at the S10 site
orange1.1t04536	Protein BONZAI 3; Copine-1; Copine-3; Copine-8; Copine-9; Copine-5; Copine-4; Copine-2; Nicotinic receptor-associated protein 1; Copine-B; Copine-7;DCD (Development and Cell Death) domain-containing protein
orange1.1t04537	Disease resistance protein At4g27190; Probable disease resistance protein At4g27220; Putative disease resistance protein At3g15700;Disease resistance protein RFL1, putative
orange1.1t04567	Uncharacterized mitochondrial protein AtMg00310;Putative non-LTR retroelement reverse transcriptase
orange1.1t04568	TIR-NBS-LRR-TIR type disease resistance protein (Fragment);TMV resistance protein N; Probable WRKY transcription factor 19; Protein SUPPRESSOR OF npr1-1, CONSTITUTIVE 1; Putative disease resistance protein At4g11170; Protein DA1-related 4; Leucine-rich repeat protein soc-2 homolog
orange1.1t04570
orange1.1t04573	TIR-NBS-LRR-TIR type disease resistance protein (Fragment);TMV resistance protein N; Protein SUPPRESSOR OF npr1-1, CONSTITUTIVE 1; Putative disease resistance protein At4g11170; Probable WRKY transcription factor 19; Protein PHLOEM PROTEIN 2-LIKE A8; Vesicle-associated protein 1-4; Protein popC; Protein lap1; Leucine-rich repeat-containing protein 40; Probable disease resistance protein At5g66890…
orange1.1t04583	Putative disease resistance RPP13-like protein 1;Leucine-rich repeat containing protein, putative
orange1.1t04588	Probable disease resistance protein At1g12280; Disease resistance protein RPS5; Putative disease resistance protein At4g10780;Late blight resistance protein R1-A, putative
orange1.1t04591	Probable disease resistance protein At1g51480; Putative disease resistance protein At4g10780; Disease resistance protein RPS2; TMV resistance protein N;Late blight resistance protein R1-A, putative
orange1.1t04609	Putative uncharacterized protein
orange1.1t04642
orange1.1t04652	Disease resistance protein RFL1, putative;Disease resistance protein RPS5; Probable disease resistance protein At1g12290; Putative disease resistance protein At3g15700; Leucine-rich repeat-containing protein 7; Leucine-rich repeat protein soc-2 homolog
orange1.1t04702	Probable WRKY transcription factor 19; TMV resistance protein N; Putative disease resistance protein At4g11170; Protein DA1-related 4; Protein SUPPRESSOR OF npr1-1, CONSTITUTIVE 1; Probable disease resistance protein At4g27220; Protein popC; Leucine-rich repeat-containing protein 39; Disease resistance protein At4g27190;Putative TIR-NBS-LRR class disease resistance protein
orange1.1t04750	TIR-NBS-LRR-TIR type disease resistance protein (Fragment);TMV resistance protein N; Putative disease resistance protein At4g11170; Protein SUPPRESSOR OF npr1-1, CONSTITUTIVE 1; Probable WRKY transcription factor 16; Protein PHLOEM PROTEIN 2-LIKE A8; Vesicle-associated protein 1-4; Probable disease resistance protein At5g66900; Protein popC; Leucine-rich repeat-containing protein 1; Protein lap1;…
orange1.1t04757	Integrase, catalytic region; Zinc finger, CCHC-type; Peptidase aspartic, catalytic
orange1.1t04767	Wall-associated receptor kinase 2; Wall-associated receptor kinase-like 8; Uromodulin; Fibulin-2;Serine-threonine protein kinase, plant-type, putative
orange1.1t04775	(R)-limonene synthase 1; Myrcene synthase, chloroplastic; (+)-alpha-pinene synthase, chloroplastic; (-)-limonene synthase, chloroplastic; Isoprene synthase, chloroplastic; Alpha-zingiberene synthase; Beta-myrcene synthase, chloroplastic; R-linalool synthase QH1, chloroplastic (Fragment); 1,8-cineole synthase, chloroplastic; Terpinolene synthase, chloroplastic; R-linalool synthase QH5, chloroplast…
orange1.1t04789	Putative uncharacterized protein
orange1.1t04866	Putative uncharacterized protein Sb05g001760;Protein TRANSPARENT TESTA 12; MATE efflux family protein ALF5
orange1.1t04872
orange1.1t04917	Tetratricopeptide repeat-containing protein
orange1.1t04919	Probable LRR receptor-like serine/threonine-protein kinase At3g47570; LRR receptor-like serine/threonine-protein kinase EFR; Putative receptor-like protein kinase At3g47110; Putative leucine-rich repeat receptor-like serine/threonine-protein kinase At2g24130; LRR receptor-like serine/threonine-protein kinase FLS2; Leucine-rich repeat receptor protein kinase EXS; Probable leucine-rich repeat recep…
orange1.1t04920	Probable disease resistance protein At4g27220;Disease resistance protein RFL1, putative
orange1.1t04930	Probable disease resistance protein At1g12290; Putative disease resistance protein At3g15700;Disease resistance protein RFL1, putative
orange1.1t04980	Serine/threonine-protein kinase BRI1-like 1; LRR receptor-like serine/threonine-protein kinase GSO1; Protein BRASSINOSTEROID INSENSITIVE 1; Brassinosteroid LRR receptor kinase; Systemin receptor SR160; Receptor-like protein kinase BRI1-like 3; Leucine-rich repeat receptor-like protein kinase PXL1; Probably inactive leucine-rich repeat receptor-like protein kinase At3g28040; Leucine-rich repeat re…
orange1.1t04987	Leucine-rich repeat family protein / protein kinase family protein;Probable LRR receptor-like serine/threonine-protein kinase At1g53430; Probable leucine-rich repeat receptor-like serine/threonine-protein kinase At3g14840; G-type lectin S-receptor-like serine/threonine-protein kinase SD2-5; Cysteine-rich receptor-like protein kinase 2; Putative receptor-like protein kinase At4g00960; LRR receptor…
orange1.1t04989	Putative uncharacterized protein (Fragment)
orange1.1t05839
orange1.1t00688	Putative uncharacterized protein (Fragment)
orange1.1t05047	Putative rice retrotransposon retrofit gag/pol polyprotein;Retrovirus-related Pol polyprotein from transposon TNT 1-94; MLO-like protein 4; Copia protein; Uncharacterized mitochondrial protein AtMg00810; Putative transposon Ty5-1 protein YCL074W
orange1.1t05062	LINE-type retrotransposon LIb DNA, complete sequence, Insertion at the S10 site;Retrovirus-related Pol polyprotein from transposon TNT 1-94; Copia protein
orange1.1t05064	Disease resistance response protein 206;Disease resistance response protein, putative
orange1.1t05068
orange1.1t05086
orange1.1t05094	Retrotransposon protein, putative, Ty3-gypsy sub-class (Fragment)
orange1.1t05109	Peptide chain release factor, putative; 8726-9996;Peptide chain release factor 1
orange1.1t05139	TMV resistance protein N; Putative disease resistance protein At4g11170; Protein SUPPRESSOR OF npr1-1, CONSTITUTIVE 1; Probable WRKY transcription factor 16; Protein DA1-related 4; Protein PHLOEM PROTEIN 2-LIKE A8; Vesicle-associated protein 1-4;Leucine-rich repeat containing protein, putative
orange1.1t05144
orange1.1t05184	Putative uncharacterized protein Sb03g033460;GDSL esterase/lipase At1g71691
orange1.1t00709	Ribulose-1,5 bisphosphate carboxylase/oxygenase large subunit N-methyltransferase, chloroplast, putative
orange1.1t05202	Transposon protein, putative, CACTA, En/Spm sub-class, expressed
orange1.1t05225	Tetratricopeptide repeat-containing protein
orange1.1t05228	MLO-like protein 4; MLO protein homolog 1; Protein MLO; MLO-like protein (Fragment);Putative uncharacterized protein Sb05g005260
orange1.1t05255	Protein FAR1-RELATED SEQUENCE 5; Protein FAR-RED IMPAIRED RESPONSE 1; Protein FAR-RED ELONGATED HYPOCOTYL 3;Putative uncharacterized protein Sb01g001615 (Fragment)
orange1.1t05292	Myrcene synthase, chloroplastic; 1,8-cineole synthase, chloroplastic; Beta-myrcene/(E)-beta-ocimene synthase 2, chloroplastic; (-)-limonene synthase, chloroplastic; R-linalool synthase QH5, chloroplastic; (+)-alpha-pinene synthase, chloroplastic; (R)-limonene synthase 1; R-linalool synthase QH1, chloroplastic (Fragment); Isoprene synthase, chloroplastic; (E,E)-alpha-farnesene synthase; (E)-beta-o…
orange1.1t05302	Predicted protein
orange1.1t05324	Retrovirus-related Pol polyprotein LINE-1;Putative non-LTR retroelement reverse transcriptase
orange1.1t05328	Disease resistance protein At4g27190; Probable disease resistance protein At4g27220; Protein popC; Protein scribble homolog; Protein lap1; Leucine-rich repeat protein soc-2 homolog; Leucine-rich repeat-containing protein 7;Disease resistance protein RFL1, putative
orange1.1t05331	Resistance protein candidate RGC20 (Fragment)
orange1.1t05353	Putative uncharacterized protein
orange1.1t05378	Rae1-like protein At1g80670; mRNA export factor; Poly(A)+ RNA export protein; Mitotic checkpoint protein BUB3; Nucleoporin GLE2; Nucleoporin-17; Uncharacterized WD repeat-containing protein alr3466; Transcriptional repressor rco-1; Probable serine/threonine-protein kinase pkwA; Vegetative incompatibility protein HET-E-1; Katanin p80 WD40 repeat-containing subunit B1 homolog 1; WD repeat-containin…
orange1.1t00723	Putative uncharacterized protein
orange1.1t00737
orange1.1t00790	Retrovirus-related Pol polyprotein from transposon TNT 1-94; Copia protein; Uncharacterized mitochondrial protein AtMg00820;Retrotransposon protein, putative, Ty1-copia sub-class

## Sheet: Supplemental Table S10
Supplemental Table S10 Sequencing confirmation of mutations in the eight candidate genes.
Gene_ID	Orange1.1t02191	Cs5g10040	Cs5g09860	Orange1.1t04609	Cs3g09160	Cs5g09880	Cs9g17760	Cs7g15170
Chromosome	ChrUn	Chr5	Chr5	ChrUn	Chr3	Chr5	Chr9	Chr7
Position	33621954	6905076 and 6905077	6784366	72897610	13013308	6798135	16966836	10820424
Reference genome	T	A C	A	G	A	T	T	T
Wild type (sequencing)	T	A C	A	G	A	T	T	T
Mutant (sequencing)	T	T A	A	G	A	T	T	T
Annotation	E3 ubiquitin-protein ligase MIB1; Ankyrin repeat-containing protein C6C3.08; E3 ubiquitin-protein ligase mind-bomb;Ankyrin repeat-containing protein	Senescence-inducible chloroplast stay-green protein	7-ethoxycoumarin O-deethylase; Cytochrome P450 76C4; Flavonoid 3'-monooxygenase; Cytochrome P450 76A1 (Fragment); Probable (S)-N-methylcoclaurine 3'-hydroxylase isozyme 2	Putative uncharacterized protein	Putative uncharacterized protein	Cytochrome P450, family 76, subfamily C, polypeptide 6;7-ethoxycoumarin O-deethylase; Cytochrome P450 76C4	Putative uncharacterized protein	Tetratricopeptide repeat (TPR)-containing protein-like protein
The eight WGS candidate genes mutations that were identified by comparison between Gene set 3 and either Gene set 1A or Gene set 2. Reference genome from the C. sinensis genomic database (http://citrus.hzau.edu.cn/orange/).

## Sheet: Supplemental Table S11
Supplemental Table S11 Citrus genes encoding enzymes required for chlorophyll degradation.
Name	Gene ID	GenBank ID
CsNYC	Cs4g15890	XM_006475562
CsNOL	Cs7g24010	XM_006485465
CsCLH	Cs5g30790	NM_001288890
CsPPH	Cs7g02240	XM_006482878
CsPAO	Cs8g15480	XM_006487933
CsRCCR	Cs1g22670	XM_006466544

## Sheet: Supplemental Table S12
Supplemental Table S12 Citrus genes encoding enzymes required for carotenoid biosynthesis.
Name	Gene ID	GenBank ID
CsPSY	Cs6g15910	AF152892
CsPDS	orange1.1t02361	XM_006420997
CsZDS	Cs3g11000	XM_025095747
CsCRTISO	Cs6g13340	XM_006481581
CsLCYB1	orange1.1t00772	AY094582
CsLCYB2	Cg8g013670	XM_006487849
CsLCYE	Cs4g14850	XM_024178617
CsHYB	Cs5g03200	XM_006476445
CsZEP	Cs1g22620	XM_006466537
CsNCED2	Cs2g03270	XM_006449645
CsNCED3	Cs5g14370	XM_006442173
CsCCD1	Cs7g01700	XM_006482805
CsCCD4a	Cs7g14820	XM_006484568
CsCCD4b	Cs8g14150	XM_006487759

[truncated: 4 more sheets: Supplemental Table S13, Supplemental Table S14, Supplemental Table S15, Supplemental Table S16]
