# Supplementary material for: Regulation of carotenoid and chlorophyll pools in hesperidia, anatomically unique fruits found only in Citrus
Source: Oxford University Press journal article supplement (doi:10.1093/plphys/kiab291), 2021-06-23
Supplement: kiab291_supplementary_data.zip [file kiab291_supplementary_data.zip › pp.00610.2021-s03.xlsx]

## Sheet: 190 WTvsMT
Supplemental Table S3 DEGs from comparison of WT and MT.
Gene_ID	logFC	logCPM	PValue	FDR
Cs2g28370	3.48752	5.06379	2.76988e-41	5.77159e-37
Cs9g16640	6.7367	5.93344	2.08909e-36	2.17651e-32
Cs5g10040	-2.16055	7.5826	4.56702e-33	3.1721e-29
orange1.1t02409	2.44184	7.87642	2.83995e-32	1.4794e-28
Cs1g22680	3.61272	5.87124	1.9884e-31	8.28646e-28
Cs1g22140	3.90736	4.30541	4.98654e-31	1.73174e-27
Cs6g09960	3.80843	7.48798	1.33947e-28	3.98723e-25
Cs9g15150	-4.7407	4.64789	5.15683e-28	1.34316e-24
Cs6g12880	4.37377	8.17965	6.41598e-28	1.48544e-24
Cs5g24520	2.51699	6.61839	3.28445e-27	6.84381e-24
Cs2g21470	-3.18078	3.54481	2.30962e-26	4.37505e-23
Cs5g09980	-3.42011	4.47129	2.19585e-25	3.81291e-22
Cs1g05770	2.06483	5.72351	3.89359e-25	6.24082e-22
Cs6g01980	2.30114	6.65944	8.23505e-25	1.22567e-21
Cs1g02760	2.53	8.8129	6.43782e-24	8.943e-21
Cs3g14680	2.5758	7.35117	9.06924e-23	1.1811e-19
Cs7g27010	2.75763	5.28073	1.47318e-22	1.80569e-19
orange1.1t04278	-6.55552	1.40922	1.64128e-22	1.89996e-19
Cs5g02790	4.44915	2.75772	3.09922e-22	3.39886e-19
Cs8g16290	2.74044	4.96998	4.65738e-22	4.85229e-19
Cs6g02360	3.10271	6.43153	5.84969e-22	5.80429e-19
Cs9g06870	2.71261	4.83935	3.23717e-21	3.06604e-18
Cs6g17500	2.65783	4.39566	7.27137e-21	6.58755e-18
Cs2g08460	2.59686	6.69871	9.25967e-21	8.03933e-18
Cs5g12900	2.83305	6.54892	1.06245e-20	8.85534e-18
Cs9g06500	2.38221	5.02208	1.25559e-20	9.70745e-18
Cs9g06490	10.4665	2.58798	1.25786e-20	9.70745e-18
orange1.1t03296	9.0291	1.20096	5.08068e-20	3.78094e-17
Cs7g02540	4.19697	2.46765	6.88425e-20	4.94645e-17
Cs3g23440	4.59021	4.8711	8.73918e-20	6.06995e-17
orange1.1t00550	-1.87143	5.41225	2.11016e-19	1.41837e-16
Cs6g09160	2.30466	7.1012	2.55078e-19	1.66096e-16
Cs2g10990	1.99521	7.21409	2.94064e-19	1.85679e-16
orange1.1t04355	1.51782	5.46719	8.02971e-19	4.89383e-16
Cs1g12300	-8.72092	3.50739	8.22019e-19	4.89383e-16
Cs1g03700	-4.99754	6.51701	1.35691e-18	7.85387e-16
Cs9g05220	1.94962	4.24105	2.28782e-18	1.28842e-15
Cs8g03230	-3.12291	4.91373	6.05076e-18	3.31788e-15
Cs6g12890	2.91885	5.16548	8.36251e-18	4.46794e-15
Cs1g06850	-2.32946	5.52076	9.88559e-18	5.14965e-15
orange1.1t02003	-1.62248	6.78585	1.17857e-17	5.98972e-15
Cs5g15000	-3.42384	5.23011	2.06188e-17	1.02294e-14
Cs8g02530	-3.57419	3.99125	3.90776e-17	1.89363e-14
orange1.1t00472	-1.41137	6.16747	5.23237e-17	2.47788e-14
orange1.1t02754	1.85916	7.71672	8.83504e-17	4.09101e-14
orange1.1t05232	-3.0116	4.02473	1.00882e-16	4.56974e-14
orange1.1t01736	-7.14303	4.87721	1.08854e-16	4.82595e-14
Cs5g08340	4.35791	2.82402	1.75658e-16	7.6254e-14
Cs3g23040	-1.58187	4.76989	2.15459e-16	9.16229e-14
Cs7g13230	-6.15243	4.47498	4.09367e-16	1.706e-13
Cs7g31640	-3.97183	4.10314	5.46411e-16	2.23247e-13
Cs8g09350	-2.3401	4.4671	6.2551e-16	2.50649e-13
Cs5g28560	-2.6164	4.43367	8.00999e-16	3.14914e-13
Cs4g17300	-1.57146	5.4956	1.5044e-15	5.80503e-13
Cs5g10850	-4.59386	2.4819	1.60777e-15	6.09112e-13
orange1.1t04155	-2.17242	4.20071	1.73638e-15	6.4609e-13
orange1.1t03054	-3.74098	2.2788	1.87136e-15	6.84097e-13
Cs8g02560	-2.86072	4.23492	2.09965e-15	7.54319e-13
Cs3g16700	1.8433	8.19402	2.23349e-15	7.888e-13
Cs2g09850	4.02082	2.35827	6.44474e-15	2.23815e-12
Cs3g08480	-2.70398	4.35812	8.59341e-15	2.93542e-12
Cs5g15350	-2.61746	6.46771	9.12796e-15	3.06773e-12
Cs2g21100	-1.85308	8.40344	1.30597e-14	4.31945e-12
Cs2g23280	-3.63847	7.38405	1.70444e-14	5.5493e-12
Cs3g21790	1.64908	7.1981	1.91589e-14	6.14176e-12
Cs6g12430	-2.31293	6.87807	2.30972e-14	7.29208e-12
orange1.1t04194	-2.43727	4.75378	2.56855e-14	7.9882e-12
Cs1g21000	3.6118	3.41559	3.26885e-14	1.00166e-11
Cs1g02280	1.4199	7.2788	3.34724e-14	1.01082e-11
Cs8g12630	-3.72196	2.63845	3.56556e-14	1.06136e-11
Cs9g18020	1.75515	6.57224	3.76719e-14	1.10559e-11
Cs7g20340	-2.76921	2.41231	5.24663e-14	1.51839e-11
Cs1g06760	1.5005	7.07439	7.5754e-14	2.16231e-11
Cs4g07270	-1.78511	5.08449	8.80933e-14	2.48054e-11
Cs8g15250	-2.42318	3.62361	1.31401e-13	3.65068e-11
Cs9g17270	2.60754	4.96613	1.36665e-13	3.74696e-11
Cs4g03330	1.32786	5.79763	1.43189e-13	3.87485e-11
Cs9g03000	-2.64514	6.20585	1.60482e-13	4.28714e-11
Cs7g29570	-3.94538	5.65803	1.9029e-13	4.98044e-11
Cs8g12640	2.28432	7.14313	1.91215e-13	4.98044e-11
Cs2g22650	-2.1923	5.49973	3.01126e-13	7.74637e-11
Cs9g05680	-2.56538	6.15149	3.09166e-13	7.85621e-11
Cs7g24820	-1.68412	6.0144	3.18755e-13	8.0023e-11
Cs2g31450	2.82483	3.81556	4.27415e-13	1.06024e-10
Cs9g03610	-2.27882	4.27503	5.48772e-13	1.34527e-10
Cs2g20200	-2.11898	5.35166	5.61819e-13	1.36123e-10
Cs1g13640	-2.45193	4.45741	5.88595e-13	1.40972e-10
Cs8g13150	-2.62198	2.52707	6.05884e-13	1.43464e-10
Cs5g30320	-3.64749	1.61512	6.57808e-13	1.54008e-10
orange1.1t03983	-3.46767	2.99974	7.96765e-13	1.84469e-10
orange1.1t04497	-1.55169	7.46051	1.05869e-12	2.42418e-10
Cs1g23720	-1.79635	5.43823	1.07408e-12	2.43268e-10
Cs5g11630	2.80579	4.49459	1.08976e-12	2.44166e-10
Cs2g13040	-2.99207	2.37158	1.16904e-12	2.59141e-10
Cs5g15530	-1.79273	7.17037	1.21536e-12	2.66573e-10
Cs6g21850	1.51222	9.15065	1.50498e-12	3.26659e-10
Cs5g18620	-2.95131	4.21808	1.53457e-12	3.29647e-10
Cs7g07120	1.53163	5.274	2.13692e-12	4.54358e-10
Cs7g10740	-2.07298	5.06173	2.20913e-12	4.64965e-10
Cs8g08710	-3.29722	6.26587	2.33693e-12	4.86947e-10
Cs4g08150	-3.86675	2.24572	2.36895e-12	4.88731e-10
Cs7g30960	-4.88789	0.361929	2.67015e-12	5.45469e-10
Cs5g06920	2.2581	4.69057	2.8664e-12	5.79875e-10
Cs1g16650	-2.95865	1.81044	3.28958e-12	6.59086e-10
Cs4g20420	1.72041	7.76147	3.53377e-12	7.01268e-10
Cs7g08110	-4.46474	3.29245	3.66164e-12	7.1979e-10
Cs7g11415	7.5	-0.184851	3.94102e-12	7.67468e-10
Cs3g20630	-3.6061	1.5787	4.48121e-12	8.64583e-10
Cs2g28830	2.66005	4.78805	4.69641e-12	8.97791e-10
Cs1g09140	-2.32278	3.94491	5.71734e-12	1.08302e-09
Cs8g08820	-2.19767	7.14559	5.88403e-12	1.10455e-09
Cs8g03930	-4.59043	0.712061	6.75357e-12	1.24797e-09
Cs3g20890	-1.94172	3.93709	6.7678e-12	1.24797e-09
orange1.1t03773	-1.33873	6.7435	7.24615e-12	1.32446e-09
Cs8g19450	1.78636	4.40435	7.35274e-12	1.33225e-09
Cs2g09840	4.33216	1.46949	7.77936e-12	1.3974e-09
Cs2g31250	-2.43884	2.45335	8.05436e-12	1.43443e-09
Cs8g15240	-1.87885	7.15391	8.33443e-12	1.46242e-09
Cs2g14940	-2.58632	6.91104	8.35187e-12	1.46242e-09
Cs1g15170	-2.2425	4.79877	8.76487e-12	1.52195e-09
Cs2g07330	-2.86605	4.81555	8.9267e-12	1.53724e-09
Cs6g12870	1.89551	6.49384	1.48017e-11	2.52805e-09
Cs7g18780	-1.98213	5.99035	1.67058e-11	2.83007e-09
Cs1g06300	1.57519	5.35074	1.79805e-11	3.02145e-09
Cs6g09530	-1.35915	5.69025	2.42537e-11	4.043e-09
Cs7g06330	-3.41708	6.63724	2.44559e-11	4.04434e-09
Cs2g16200	-2.22315	6.0985	2.70011e-11	4.4301e-09
orange1.1t02608	1.38939	4.88921	2.95941e-11	4.81759e-09
Cs3g05800	-2.03525	7.2648	3.02369e-11	4.88408e-09
Cs5g10090	-1.33786	6.25853	4.6143e-11	7.39601e-09
orange1.1t04366	-3.11469	1.41041	5.25479e-11	8.35833e-09
Cs2g23870	5.43555	1.17378	5.34122e-11	8.37228e-09
Cs5g02340	1.78972	7.31164	5.34392e-11	8.37228e-09
Cs9g16770	-2.52962	2.4094	5.47556e-11	8.51449e-09
orange1.1t00415	1.52567	5.19835	5.56117e-11	8.52497e-09
Cs6g15650	-4.44094	0.806301	5.56412e-11	8.52497e-09
Cs6g09810	3.20971	1.68475	5.77837e-11	8.7886e-09
Cs4g12280	-2.11512	3.24193	7.28649e-11	1.10021e-08
Cs7g06320	-2.17728	7.23135	8.8189e-11	1.32201e-08
Cs6g12390	-3.86597	1.0795	9.58334e-11	1.42634e-08
Cs2g12490	-2.81618	3.78904	9.83815e-11	1.45388e-08
orange1.1t01192	4.13755	2.35688	1.10245e-10	1.61773e-08
Cs2g10720	5.44073	1.69722	1.1222e-10	1.63519e-08
Cs1g06880	-1.29727	5.62622	1.20316e-10	1.74099e-08
orange1.1t00880	-4.18707	1.10132	1.38623e-10	1.99206e-08
Cs5g25950	4.03972	1.86913	1.48159e-10	2.11451e-08
Cs3g16400	3.77759	3.02331	1.66386e-10	2.3585e-08
Cs3g26690	-2.45795	4.14853	1.70548e-10	2.40115e-08
orange1.1t00185	-2.43354	2.57525	1.81262e-10	2.53488e-08
orange1.1t00956	-1.11806	8.30108	1.8947e-10	2.63198e-08
orange1.1t01339	-1.63502	7.84147	1.98382e-10	2.73754e-08
Cs9g08030	-3.01867	2.4779	2.10365e-10	2.8838e-08
Cs7g09900	-3.0378	4.53078	2.19359e-10	2.97196e-08
Cs5g30850	2.4745	8.04983	2.19648e-10	2.97196e-08
Cs2g30320	1.53067	6.85239	2.28497e-10	3.07173e-08
Cs6g18680	-2.94028	7.58442	2.64215e-10	3.52913e-08
Cs2g01090	-2.71596	2.99164	2.68025e-10	3.55723e-08
Cs6g16200	-1.45395	4.81194	2.75304e-10	3.6307e-08
Cs3g06370	-3.73485	1.18355	3.0027e-10	3.92105e-08
Cs5g16220	4.94702	3.38776	3.01083e-10	3.92105e-08
Cs6g15140	4.6821	0.15596	3.25048e-10	4.20684e-08
Cs9g16810	-2.08495	4.12631	3.49913e-10	4.5007e-08
orange1.1t00001	-1.61783	4.29822	3.91026e-10	4.99865e-08
Cs1g10540	-1.67242	8.68985	4.54322e-10	5.77238e-08
Cs2g16120	-1.88858	3.95601	4.6744e-10	5.87138e-08
Cs6g03210	-3.46751	1.45583	4.67749e-10	5.87138e-08
orange1.1t04319	-8.10668	0.360141	4.82434e-10	6.01945e-08
Cs6g07430	-3.03978	3.68313	5.62972e-10	6.98253e-08
Cs2g03230	1.22476	8.60227	5.71224e-10	7.04295e-08
orange1.1t04193	-3.6512	0.633485	6.58074e-10	8.06606e-08
Cs2g10620	-1.73915	6.43592	6.86471e-10	8.36492e-08
orange1.1t02046	-1.45175	5.37084	7.15771e-10	8.67124e-08
Cs5g16310	-1.40439	5.29114	7.56265e-10	9.10884e-08
orange1.1t00062	-3.19776	2.01706	8.19062e-10	9.8085e-08
Cs8g19140	1.02799	7.18672	8.63513e-10	1.02817e-07
Cs9g09530	-1.87315	7.04171	9.38622e-10	1.11125e-07
Cs2g19680	-1.84547	4.01987	9.51424e-10	1.12005e-07
Cs3g06830	1.50666	7.87312	1.01818e-09	1.1919e-07
orange1.1t01747	-3.56573	2.9063	1.1647e-09	1.3558e-07
Cs3g23110	2.49824	8.5919	1.17553e-09	1.3608e-07
orange1.1t04775	-5.43802	-0.305298	1.19488e-09	1.37504e-07
Cs3g15450	-1.64623	5.13644	1.20603e-09	1.37504e-07
Cs1g23450	-2.16762	7.36764	1.20762e-09	1.37504e-07
Cs3g18110	-1.97856	2.46316	1.22263e-09	1.37971e-07
Cs7g27290	-2.45725	4.5636	1.22497e-09	1.37971e-07
Cs8g13660	-2.00314	6.185	1.27101e-09	1.42387e-07
Cs2g28570	-4.36098	-0.0858922	1.43591e-09	1.6e-07
orange1.1t02800	-2.47029	3.85079	1.53928e-09	1.70606e-07
Cs3g01585	3.12416	3.91223	1.56299e-09	1.72318e-07
Cs8g09780	3.94071	4.85089	1.66954e-09	1.83095e-07
Cs1g11710	-3.8562	1.48343	1.71386e-09	1.86973e-07
Cs3g07330	-1.75026	8.809	1.7394e-09	1.8877e-07
Cs6g10120	-3.65656	6.97459	1.82854e-09	1.97416e-07
Cs7g19720	-2.45689	4.41434	1.97366e-09	2.11985e-07
Cs1g20710	-2.2733	2.95029	1.98856e-09	2.1249e-07
Cs8g03370	-1.49798	6.8012	2.02416e-09	2.15191e-07
Cs4g05900	-1.81472	3.60627	2.14261e-09	2.26627e-07
Cs9g02540	-2.16693	3.8916	2.19071e-09	2.30544e-07
Cs3g04390	-5.32353	0.285088	2.2196e-09	2.32092e-07
Cs5g10550	1.95352	5.88249	2.22828e-09	2.32092e-07
Cs2g02450	1.35244	4.31686	2.23883e-09	2.32092e-07
Cs2g10580	1.36823	6.92745	2.36002e-09	2.43445e-07
Cs5g05670	-2.82418	3.50585	2.37342e-09	2.4362e-07
Cs8g08760	-1.3558	4.44927	2.44167e-09	2.49397e-07
Cs2g31350	-2.53409	1.98542	2.49535e-09	2.53637e-07
Cs9g09720	1.3383	4.70519	2.68891e-09	2.71984e-07
orange1.1t03119	1.39619	6.38959	2.72863e-09	2.74669e-07
Cs4g02260	1.74454	5.76054	2.74739e-09	2.75228e-07
Cs4g20060	-5.57429	1.3291	2.7737e-09	2.76534e-07
Cs5g04300	-3.22389	1.17451	2.85997e-09	2.83777e-07
Cs5g10140	-1.37557	8.91498	3.14422e-09	3.10503e-07
orange1.1t05236	-5.28679	-0.428887	3.20733e-09	3.14954e-07
Cs1g13620	1.63071	7.88657	3.23215e-09	3.14954e-07
Cs4g12030	1.03032	7.27552	3.23464e-09	3.14954e-07
Cs1g08130	2.44605	2.54538	3.65509e-09	3.54238e-07
Cs3g09160	-3.91075	1.11692	4.09403e-09	3.94941e-07
Cs4g01490	-2.28924	2.14943	4.72836e-09	4.5235e-07
Cs6g10520	-1.09589	4.84621	4.73256e-09	4.5235e-07
Cs3g16650	2.9877	1.92751	4.82222e-09	4.58816e-07
orange1.1t04496	-1.28907	5.79201	4.99679e-09	4.73264e-07
Cs5g19060	1.70207	5.5086	5.1273e-09	4.83428e-07
Cs8g19860	-1.0623	6.45014	5.16882e-09	4.85148e-07
Cs9g09170	-2.94956	1.27139	5.2925e-09	4.94528e-07
Cs1g22430	1.07209	7.57664	5.71605e-09	5.3172e-07
orange1.1t03042	4.17928	2.14292	5.76717e-09	5.34091e-07
Cs1g18450	-2.5526	1.69217	5.79818e-09	5.34587e-07
Cs3g01480	-1.5355	6.18883	5.97505e-09	5.48467e-07
Cs6g17190	-1.42507	6.15491	6.14422e-09	5.61522e-07
Cs7g02670	-1.47752	7.84256	6.32926e-09	5.75908e-07
Cs2g01750	-2.04573	4.64851	6.44916e-09	5.83337e-07
Cs5g09110	-2.50957	3.50208	6.4669e-09	5.83337e-07
Cs9g14360	-2.23967	4.69145	7.18639e-09	6.44321e-07
Cs7g22860	-1.86966	3.69015	7.20482e-09	6.44321e-07
Cs3g10550	1.28175	6.26032	7.23626e-09	6.44367e-07
Cs5g34690	-2.24577	4.18979	7.51397e-09	6.65805e-07
Cs2g08540	-2.54282	4.14637	7.54091e-09	6.65805e-07
orange1.1t01353	-1.3645	8.73034	8.02537e-09	7.05589e-07
Cs3g24120	1.71072	3.46281	8.32587e-09	7.25884e-07
Cs4g18790	1.01936	10.4893	9.01819e-09	7.82966e-07
orange1.1t03585	-1.87672	2.74143	9.23971e-09	7.98871e-07
Cs3g26760	-2.20864	3.71913	9.36801e-09	8.06617e-07
Cs9g06540	1.34911	5.45241	9.53447e-09	8.17571e-07
orange1.1t00580	1.27848	4.95692	1.0169e-08	8.65816e-07
Cs7g01700	-1.71155	4.21349	1.01802e-08	8.65816e-07
Cs7g08100	5.71889	-0.0953631	1.03341e-08	8.75334e-07
Cs8g19630	3.68452	0.319719	1.03979e-08	8.7717e-07
Cs3g15540	1.14593	8.50518	1.24898e-08	1.04518e-06
Cs8g14690	-2.06181	7.38682	1.28993e-08	1.07513e-06
Cs8g04530	-1.38232	5.40358	1.40143e-08	1.16341e-06
Cs7g06840	-1.61014	5.5121	1.46119e-08	1.20821e-06
Cs3g10250	1.4968	7.23154	1.56233e-08	1.28673e-06
Cs7g08000	-1.28688	4.92589	1.57985e-08	1.29604e-06
Cs8g19380	-1.14971	5.70871	1.59167e-08	1.30062e-06
Cs5g08070	-2.57369	2.70702	1.6272e-08	1.32445e-06
orange1.1t03504	-1.93885	5.30134	1.65878e-08	1.3449e-06
Cs6g19630	1.46079	4.97221	1.81058e-08	1.45972e-06
orange1.1t02620	3.7507	0.692781	1.8144e-08	1.45972e-06
Cs7g15320	-1.44535	7.58412	1.86886e-08	1.49661e-06
Cs1g13300	-1.63753	3.49545	1.87463e-08	1.49661e-06
Cs7g08190	-1.4331	3.84284	1.90753e-08	1.51707e-06
orange1.1t00401	-2.18795	2.11126	2.11404e-08	1.67492e-06
Cs3g24200	2.52562	1.11153	2.19274e-08	1.73069e-06
Cs7g14430	-1.6153	6.32449	2.256e-08	1.7739e-06
Cs2g26650	-2.02083	3.72946	2.63981e-08	2.06789e-06
Cs1g20820	1.00746	6.86444	2.65235e-08	2.06992e-06
Cs2g19380	-1.74491	4.63638	2.7204e-08	2.11511e-06
Cs6g17750	-2.01819	3.34486	2.97454e-08	2.29946e-06
Cs7g27685	2.50844	1.44893	2.97957e-08	2.29946e-06
Cs9g04470	1.14815	6.52948	3.00557e-08	2.31096e-06
Cs8g17770	-1.32359	6.72335	3.02414e-08	2.31669e-06
Cs1g26360	-2.01934	3.38408	3.18079e-08	2.41242e-06
Cs5g15450	-1.46714	4.41733	3.19139e-08	2.41242e-06
Cs7g28370	1.44711	7.35307	3.19443e-08	2.41242e-06
Cs3g09090	-1.2357	5.37848	3.19541e-08	2.41242e-06
orange1.1t02947	-1.23127	4.6229	3.2155e-08	2.41882e-06
orange1.1t04316	-6.94622	1.03103	3.25095e-08	2.43669e-06
Cs1g03510	-3.65193	0.63293	3.31953e-08	2.47918e-06
Cs3g03790	-2.20155	2.93821	3.58768e-08	2.66987e-06
Cs3g11790	1.56916	3.58884	3.61865e-08	2.6754e-06
Cs2g16810	-2.95441	0.946254	4.13718e-08	3.04616e-06
Cs7g21920	-2.64206	0.896017	4.45412e-08	3.26798e-06
Cs2g21210	-2.94372	2.30126	4.68072e-08	3.42218e-06
Cs7g18550	-1.26398	6.4706	4.86631e-08	3.54543e-06
Cs6g17410	-1.22337	4.99541	5.13165e-08	3.72572e-06
orange1.1t02321	-1.37361	7.29618	5.38098e-08	3.87757e-06
orange1.1t02977	4.30457	1.31672	5.39734e-08	3.87757e-06
Cs9g03490	-2.44191	1.9365	5.41159e-08	3.87757e-06
Cs8g08680	-2.7012	1.17669	5.41524e-08	3.87757e-06
Cs6g22390	-2.39924	3.69967	5.52803e-08	3.94478e-06
orange1.1t00576	-3.57099	2.42448	5.80126e-08	4.1116e-06
Cs1g23060	-1.18286	4.80476	5.9401e-08	4.19572e-06
orange1.1t03382	2.0836	2.74907	6.00671e-08	4.22844e-06
Cs7g31000	-1.06123	7.27253	6.21738e-08	4.36201e-06
Cs3g12510	-1.26008	5.00165	6.28917e-08	4.39757e-06
Cs4g15890	1.19361	7.60981	6.31172e-08	4.39857e-06
Cs2g15470	-10.0795	2.2163	6.57281e-08	4.56525e-06
Cs2g20390	-4.47182	-0.428388	6.66954e-08	4.61705e-06
Cs4g17630	1.10928	6.8804	6.81025e-08	4.69885e-06
orange1.1t01983	1.71979	3.76873	6.84433e-08	4.70677e-06
Cs3g20250	-2.21446	3.82399	6.87822e-08	4.71452e-06
Cs7g05970	-1.22239	4.33171	6.95989e-08	4.75486e-06
Cs6g03280	-1.40904	9.03724	6.99456e-08	4.76293e-06
orange1.1t05126	-6.84257	-0.713198	7.30313e-08	4.95685e-06
Cs3g01490	-1.9537	3.40066	7.32791e-08	4.95752e-06
Cs2g30190	-1.9561	2.55648	7.43781e-08	5.01558e-06
orange1.1t00259	-3.73754	0.559845	7.56891e-08	5.08753e-06
Cs1g23200	1.32663	4.57932	7.71577e-08	5.15719e-06
Cs5g09860	-2.67124	2.64595	7.72204e-08	5.15719e-06
orange1.1t03005	-1.36985	8.16472	7.74788e-08	5.15791e-06
Cs8g20240	-1.33196	5.04056	7.85683e-08	5.21379e-06
Cs7g31800	-1.40541	7.26915	7.95674e-08	5.26332e-06
Cs9g16690	-1.42852	3.60958	8.10872e-08	5.34688e-06
Cs1g26340	1.67328	4.57195	8.21208e-08	5.39795e-06
Cs3g25380	1.64412	3.31742	8.86586e-08	5.80937e-06
Cs5g18660	-1.51831	6.27315	9.17197e-08	5.99111e-06
orange1.1t00433	1.09552	7.22463	9.27796e-08	6.0414e-06
Cs3g25010	-2.39087	2.1444	9.42642e-08	6.11895e-06
Cs4g11150	1.09447	10.4339	9.64127e-08	6.23088e-06
Cs9g02520	-3.04526	1.51546	9.65865e-08	6.23088e-06
Cs9g04890	1.10121	5.0516	1.00956e-07	6.48764e-06
Cs4g04210	-2.71943	6.42635	1.01386e-07	6.48764e-06
Cs3g18080	-1.32632	4.18295	1.01501e-07	6.48764e-06
Cs5g31970	-2.1531	2.88992	1.03856e-07	6.61786e-06
Cs5g03560	1.18948	6.12362	1.04394e-07	6.62593e-06
Cs4g05910	-2.5214	1.18254	1.04618e-07	6.62593e-06
Cs2g05530	-1.40393	5.93513	1.07722e-07	6.80186e-06
Cs8g05230	-2.44265	3.82702	1.09924e-07	6.91988e-06
Cs6g12920	-1.3952	4.76317	1.12417e-07	7.05549e-06
Cs7g27540	-1.45251	6.42867	1.13382e-07	7.09473e-06
Cs4g12290	-1.85927	2.28195	1.14539e-07	7.14564e-06
Cs1g22940	-1.4938	9.873	1.15005e-07	7.15333e-06
Cs5g32450	1.0441	4.90141	1.16259e-07	7.20079e-06
Cs3g23560	1.62916	4.67074	1.16459e-07	7.20079e-06
Cs5g17900	1.67751	4.47648	1.29581e-07	7.96485e-06
Cs5g05240	-1.71814	3.82004	1.35484e-07	8.27885e-06
Cs4g07650	-2.45477	4.83143	1.36414e-07	8.29398e-06
Cs4g16680	-1.49536	5.62808	1.36802e-07	8.29398e-06
Cs9g14240	-4.44451	-0.449767	1.36926e-07	8.29398e-06
Cs5g04160	-2.88823	0.653887	1.42975e-07	8.63527e-06
Cs8g20410	-1.97341	2.95476	1.47927e-07	8.90852e-06
Cs2g15735	1.27237	3.76362	1.51349e-07	9.08837e-06
Cs2g10530	-1.55854	5.37788	1.52587e-07	9.13634e-06
Cs5g01510	1.07029	7.07353	1.57602e-07	9.4096e-06
orange1.1t00382	-3.84533	0.0738107	1.61653e-07	9.59653e-06
Cs6g18850	-1.75248	2.91268	1.61722e-07	9.59653e-06
Cs6g07030	-2.93453	1.07331	1.62114e-07	9.59653e-06
Cs7g28110	-1.11691	4.92072	1.67407e-07	9.88177e-06
orange1.1t02024	-1.57721	3.42098	1.71142e-07	1.00737e-05
Cs3g10440	-1.23029	4.42091	1.77549e-07	1.04214e-05
Cs5g30790	1.87529	6.07108	1.79697e-07	1.05075e-05
Cs8g16750	1.1876	7.12167	1.80025e-07	1.05075e-05
Cs2g05560	-1.25145	7.19851	1.81026e-07	1.05364e-05
Cs7g09200	-1.11247	5.5762	1.86739e-07	1.08387e-05
Cs1g17420	1.02048	8.2924	1.93068e-07	1.11749e-05
Cs1g16430	-1.15334	8.7608	1.94984e-07	1.12287e-05
Cs5g21690	1.7501	3.3441	1.95076e-07	1.12287e-05
Cs2g10540	-2.42371	2.05215	1.96716e-07	1.12919e-05
Cs7g15080	-2.86484	0.797938	2.00056e-07	1.14302e-05
Cs3g26480	-1.34029	6.25558	2.00221e-07	1.14302e-05
Cs2g17260	-1.40436	6.13053	2.02843e-07	1.15482e-05
Cs6g21320	-1.90693	3.64974	2.04495e-07	1.16105e-05
Cs3g27050	-2.55676	2.82457	2.15004e-07	1.2174e-05
Cs5g27660	-3.10168	0.913022	2.1882e-07	1.23565e-05
Cs2g31150	-1.20019	4.34617	2.25176e-07	1.26811e-05
orange1.1t03589	-1.50431	6.81984	2.31253e-07	1.29882e-05
Cs2g12100	1.09909	6.75876	2.35913e-07	1.32143e-05
Cs6g19640	1.04816	5.46719	2.39987e-07	1.34064e-05
Cs4g17370	-3.54827	0.232569	2.40933e-07	1.34233e-05
Cs3g17310	-1.36086	4.09337	2.45807e-07	1.36584e-05
Cs8g14150	1.09441	8.03618	2.53597e-07	1.40537e-05
Cs1g23940	-3.07895	0.163002	2.58271e-07	1.42748e-05
Cs6g17510	-1.44243	8.01802	2.59542e-07	1.43071e-05
Cs9g06660	-2.27457	4.51505	2.75506e-07	1.5147e-05
Cs7g02680	-1.73011	3.05506	2.78737e-07	1.52843e-05
Cs3g25370	1.14859	6.11927	2.84021e-07	1.55015e-05
orange1.1t01050	-1.91372	2.29159	2.84185e-07	1.55015e-05
Cs2g01250	-6.20849	1.92751	3.00805e-07	1.63365e-05
Cs4g10110	-1.56548	5.47278	3.01061e-07	1.63365e-05
Cs5g03260	-3.35997	-0.102747	3.11394e-07	1.68533e-05
Cs6g14270	-2.20369	1.71716	3.17114e-07	1.71184e-05
orange1.1t01327	-2.2165	1.93279	3.35577e-07	1.80683e-05
Cs7g30500	-1.22374	4.21981	3.45162e-07	1.85364e-05
Cs4g18450	1.09554	8.66754	3.52995e-07	1.89083e-05
Cs1g08890	-2.46013	3.23025	3.89741e-07	2.08232e-05
Cs7g18430	1.09278	4.54103	3.95166e-07	2.10053e-05
Cs8g06620	-2.40133	2.7416	4.15363e-07	2.19668e-05
Cs8g05810	-1.25676	6.29286	4.295e-07	2.2657e-05
orange1.1t00831	-2.44589	1.1688	4.3254e-07	2.27597e-05
Cs5g34450	-1.99727	4.56409	4.3693e-07	2.29328e-05
Cs5g21830	-1.32057	6.5444	4.4616e-07	2.32998e-05
Cs4g15770	-1.52333	4.63749	4.67175e-07	2.43363e-05
Cs5g32150	-1.97422	3.02532	4.7014e-07	2.44297e-05
Cs1g13710	-1.10375	7.04905	4.7242e-07	2.44871e-05
Cs2g30400	-2.44062	3.32445	4.85208e-07	2.50875e-05
Cs5g08200	-1.53068	3.55069	5.04781e-07	2.6035e-05
Cs8g11653	-4.78492	-0.821584	5.71068e-07	2.93811e-05
orange1.1t04613	1.08435	4.41508	5.77108e-07	2.96187e-05
Cs6g07770	-1.80683	3.24854	5.79503e-07	2.96686e-05
Cs3g04360	-1.32625	9.59685	6.04004e-07	3.08471e-05
Cs2g03080	-3.3199	4.79688	6.084e-07	3.09957e-05
orange1.1t03603	1.36014	6.47527	6.13748e-07	3.11918e-05
Cs3g19990	1.11375	4.96578	6.37515e-07	3.21644e-05
Cs3g27520	-1.37705	5.80022	6.5077e-07	3.27539e-05
Cs4g01990	-3.13965	0.771985	6.5414e-07	3.28441e-05
Cs8g07090	-1.1903	5.62565	6.76381e-07	3.38792e-05
Cs5g10170	-1.9892	3.99757	6.91303e-07	3.45436e-05
Cs7g12440	1.26472	4.73696	7.0788e-07	3.52031e-05
Cs4g02940	-2.83967	0.104735	7.09968e-07	3.52229e-05
Cs9g16360	1.25611	5.03726	7.19819e-07	3.56268e-05
Cs9g05910	-2.11371	3.25017	7.25657e-07	3.58306e-05
Cs2g03820	1.43804	3.61488	7.3084e-07	3.60012e-05
Cs3g26730	-2.76017	1.82797	7.38128e-07	3.62744e-05
Cs2g22390	-1.26505	5.2831	7.52511e-07	3.68943e-05
Cs6g07400	2.94333	4.62162	7.78354e-07	3.80718e-05
Cs3g19040	1.08401	6.89732	8.07496e-07	3.94047e-05
Cs5g34290	-2.31456	1.11156	8.58923e-07	4.18163e-05
Cs2g13450	-1.67329	5.46085	8.62735e-07	4.1904e-05
Cs7g28170	-1.08951	8.27563	8.78106e-07	4.24527e-05
orange1.1t04356	1.33655	3.37361	8.87791e-07	4.28215e-05
Cs6g14460	-1.09307	5.88583	9.03834e-07	4.34947e-05
Cs5g02310	2.83619	0.825013	9.09394e-07	4.36614e-05
orange1.1t03307	-1.62392	4.77391	9.16399e-07	4.38965e-05
orange1.1t02547	1.6881	4.01548	9.19866e-07	4.39616e-05
orange1.1t03325	1.76489	3.57038	9.54226e-07	4.54993e-05
Cs2g09520	-2.02531	3.25702	9.59399e-07	4.56415e-05
Cs1g25510	-1.74024	6.44581	9.65953e-07	4.58487e-05
Cs2g13800	6.65058	-0.874927	9.7509e-07	4.61772e-05
orange1.1t03034	1.88496	2.96377	9.82427e-07	4.64191e-05
Cs8g14700	-1.48243	3.58425	9.849e-07	4.64307e-05
Cs9g19160	-1.34439	5.68402	1.01892e-06	4.79258e-05
Cs3g04800	1.87535	3.45895	1.04181e-06	4.88923e-05
Cs7g05540	3.51508	0.344994	1.07443e-06	5.03101e-05
orange1.1t03822	-1.23677	4.60101	1.0798e-06	5.04481e-05
Cs8g19010	-1.63504	4.53059	1.09063e-06	5.08399e-05
Cs5g25930	1.15908	5.22049	1.13275e-06	5.25339e-05
Cs8g17160	1.83186	3.72764	1.13705e-06	5.25339e-05
Cs2g05930	-3.16646	0.363423	1.20628e-06	5.5609e-05
orange1.1t03798	-2.40747	1.88254	1.22228e-06	5.6222e-05
Cs6g04560	-2.94413	-0.0852775	1.23155e-06	5.65238e-05
Cs9g16820	-1.30653	4.37776	1.29577e-06	5.92105e-05
Cs1g23800	1.90608	1.59453	1.29949e-06	5.92504e-05
Cs3g03670	-2.35658	3.29189	1.33784e-06	6.08657e-05
Cs4g03730	1.15412	4.45802	1.35102e-06	6.13315e-05
Cs5g25900	1.46938	3.9321	1.38155e-06	6.25812e-05
Cs3g26470	-1.70627	3.98441	1.39153e-06	6.28965e-05
Cs3g19650	-1.62539	5.16567	1.39608e-06	6.29656e-05
orange1.1t00825	-2.36598	1.70177	1.41826e-06	6.38277e-05
Cs7g14940	2.67025	0.760283	1.43091e-06	6.42585e-05
Cs2g01220	-1.6795	2.22191	1.4555e-06	6.51612e-05
Cs9g06150	-1.47531	3.54309	1.45727e-06	6.51612e-05
Cs6g16450	-2.51983	1.13212	1.50002e-06	6.69291e-05
Cs5g27320	-4.0113	1.32694	1.57876e-06	7.02921e-05
Cs9g17380	1.64155	3.36516	1.60065e-06	7.09633e-05
Cs6g16890	-1.05063	4.7534	1.66917e-06	7.3619e-05
Cs2g16900	1.66289	6.25605	1.67115e-06	7.3619e-05
Cs5g18210	-1.01164	4.65472	1.68854e-06	7.4228e-05
Cs3g25420	1.02089	8.12541	1.69568e-06	7.43031e-05
Cs5g02480	1.69243	4.25542	1.71398e-06	7.48726e-05
Cs3g17390	-1.11957	5.45845	1.75099e-06	7.63293e-05
Cs5g28730	2.47621	2.30168	1.77757e-06	7.73262e-05
Cs2g25580	1.34083	7.30976	1.81986e-06	7.90007e-05
Cs5g21700	1.79579	2.52635	1.9185e-06	8.31099e-05
Cs3g10980	-1.49046	3.12324	1.96018e-06	8.46045e-05
Cs1g18530	3.75436	-0.0286788	1.96112e-06	8.46045e-05
Cs3g13820	-1.95876	2.06973	2.01057e-06	8.62812e-05
Cs7g26650	-2.72245	2.57386	2.01241e-06	8.62812e-05
orange1.1t00563	-1.01267	7.13059	2.02624e-06	8.66957e-05
Cs7g15000	-1.15337	4.75754	2.09483e-06	8.94467e-05
orange1.1t04318	-6.62669	-0.879842	2.11828e-06	9.00788e-05
Cs8g19960	-1.07558	4.02516	2.12548e-06	9.02007e-05
Cs3g02330	-2.18924	1.91198	2.13169e-06	9.02803e-05
Cs6g13860	-1.72447	5.66563	2.20294e-06	9.31087e-05
Cs7g02380	2.074	2.96043	2.21329e-06	9.3357e-05
Cs3g26940	-1.01732	5.75486	2.24689e-06	9.45828e-05
Cs5g01260	-1.08994	6.74677	2.26697e-06	9.52358e-05
Cs3g21870	1.92631	4.25592	2.28015e-06	9.55967e-05
orange1.1t02788	-1.09209	7.1344	2.31604e-06	9.67123e-05
Cs6g14840	-1.64639	3.52019	2.32484e-06	9.68853e-05
orange1.1t05831	-2.16083	1.98167	2.36107e-06	9.8199e-05
Cs2g22370	-2.42941	0.527313	2.37146e-06	9.84343e-05
Cs8g08300	-1.06998	5.51752	2.41237e-06	9.99334e-05
Cs3g14620	-1.79898	3.53515	2.45694e-06	0.000101312
Cs2g21340	-2.82325	-0.0353228	2.45765e-06	0.000101312
Cs7g02700	-2.0064	1.53728	2.51832e-06	0.0001035
Cs3g17760	-2.72279	2.46345	2.56291e-06	0.000104918
Cs2g04370	-1.16977	6.31654	2.5727e-06	0.000105112
Cs3g16570	1.46767	6.122	2.58328e-06	0.000105338
Cs4g06950	3.17223	1.96786	2.70686e-06	0.000109733
orange1.1t02796	2.65515	5.40927	2.78653e-06	0.000112525
Cs7g11130	1.41159	3.75367	2.87966e-06	0.000116061
Cs2g20210	-1.69758	4.93616	2.91167e-06	0.000117124
Cs4g11610	-1.4935	3.60167	2.9618e-06	0.000118911
Cs8g02840	1.49663	6.80258	3.05612e-06	0.00012207
Cs3g18710	6.01264	0.157429	3.05804e-06	0.00012207
Cs8g18750	-1.02203	5.27609	3.08118e-06	0.000122758
Cs3g04190	-1.02921	5.32148	3.11067e-06	0.000123696
Cs8g03410	-1.37125	5.33563	3.1224e-06	0.000123927
Cs3g24530	-2.08807	2.22757	3.14063e-06	0.000124192
Cs3g08430	-1.94453	2.422	3.1462e-06	0.000124192
Cs8g18360	1.54366	7.58128	3.14698e-06	0.000124192
Cs5g13470	-3.99406	-0.793741	3.25466e-06	0.000127957
Cs7g05460	-1.67516	4.29094	3.33787e-06	0.000130982
Cs7g18280	-1.63848	4.25927	3.35397e-06	0.000131366
orange1.1t03275	1.05008	6.10436	3.37859e-06	0.000131887
Cs2g26323	-6.50935	-0.969986	3.37993e-06	0.000131887
orange1.1t03462	-1.86404	2.45788	3.48454e-06	0.000135715
Cs4g20550	-1.06244	6.77133	3.63426e-06	0.000140832
Cs4g14590	2.42498	1.26147	3.82026e-06	0.000147477
Cs3g15630	1.0723	5.18387	3.82194e-06	0.000147477
Cs5g29040	-1.58937	2.61201	3.83393e-06	0.000147666
Cs7g22250	1.13711	6.72687	3.94234e-06	0.000151562
Cs8g09070	-1.95359	6.14935	3.98017e-06	0.0001527
orange1.1t00261	-1.08605	6.37736	3.9866e-06	0.0001527
Cs5g21190	2.27992	2.09537	3.99688e-06	0.000152813
orange1.1t01278	-1.79514	3.72203	4.45074e-06	0.000169543
Cs8g18450	-1.27692	5.17301	4.52972e-06	0.000172237
orange1.1t00611	2.81061	1.24125	4.5742e-06	0.000173611
Cs1g20690	-2.11852	1.00402	4.66488e-06	0.000176731
Cs5g11560	1.92966	2.94969	4.685e-06	0.000177171
orange1.1t05585	-1.92844	2.56285	4.75663e-06	0.000179554
Cs1g08440	-1.29663	7.64028	4.86163e-06	0.000182721
Cs9g08130	2.48044	0.861036	4.86684e-06	0.000182721
orange1.1t04323	5.96246	0.113446	4.88895e-06	0.000183221
Cs7g30280	-1.09904	4.86643	4.90588e-06	0.000183526
Cs7g10720	-1.13183	4.29601	5.10655e-06	0.00019069
Cs3g23030	-1.68379	3.04563	5.56328e-06	0.000207374
Cs4g20590	-1.04113	8.59725	5.62613e-06	0.000209342
Cs5g13010	1.39222	4.94816	5.86984e-06	0.000218021
orange1.1t04852	-2.46327	0.623743	6.05554e-06	0.000224518
Cs3g12640	-2.72821	2.17448	6.09182e-06	0.000225062
Cs1g03980	-1.83861	4.19938	6.13892e-06	0.000226401
Cs8g11656	-3.87673	-0.879111	6.1773e-06	0.000227414
Cs6g12060	-1.5051	2.65335	6.23483e-06	0.000229127
Cs3g18660	-2.07246	2.46006	6.30788e-06	0.000231074
Cs7g13970	-1.6219	3.16285	6.30997e-06	0.000231074
orange1.1t02448	-1.37195	5.76961	6.40479e-06	0.000234134
Cs2g17980	-1.37385	7.80518	6.51519e-06	0.000237753
Cs7g24240	-2.56835	1.21808	6.55626e-06	0.000238833
Cs7g24340	1.83996	2.63061	6.63337e-06	0.000241221
Cs7g13940	-1.09521	6.75254	6.70787e-06	0.000243505
Cs1g19320	-2.04026	7.15606	6.80602e-06	0.000246638
Cs7g26580	-2.1286	1.45146	6.82744e-06	0.000246985
Cs5g08670	-1.14251	4.42892	6.96453e-06	0.000251508
orange1.1t03613	-1.08039	5.07236	7.17103e-06	0.000257625
Cs4g03740	2.95987	1.97442	7.35816e-06	0.000263893
Cs4g20530	-1.33541	5.56533	7.50327e-06	0.000268635
Cs5g13890	-2.28632	1.08809	7.64852e-06	0.000272431
Cs4g06030	-2.54397	4.00243	7.69705e-06	0.000273226
Cs5g29870	-2.24551	4.19467	7.80511e-06	0.00027659
Cs2g07420	-1.43123	4.53388	7.87233e-06	0.000278184
Cs6g09880	-1.0876	3.88354	7.87679e-06	0.000278184
Cs4g15560	2.89351	0.545716	8.05381e-06	0.000283955
orange1.1t05466	-1.54238	3.37153	8.11275e-06	0.00028555
Cs3g13300	-1.03863	6.05969	8.18826e-06	0.000287721
orange1.1t02520	-2.52393	0.601858	8.24784e-06	0.000289327
Cs4g05530	-1.31804	2.85929	8.94887e-06	0.000311819
Cs7g16240	-1.0547	4.78892	9.10827e-06	0.000316315
Cs2g20400	-1.83585	4.63002	9.19323e-06	0.000318734
Cs5g08640	1.15249	6.6544	9.26882e-06	0.000320821
Cs9g05340	-4.23672	-0.611199	9.57008e-06	0.000329606
Cs6g12450	-1.95587	1.004	9.79113e-06	0.000336663
Cs2g17070	-4.03021	-0.76658	9.91846e-06	0.000340479
Cs2g11560	1.94447	0.971068	1.03074e-05	0.00035325
Cs9g09570	-1.24486	5.32823	1.05788e-05	0.000361492
Cs4g12220	-1.62245	3.04674	1.05826e-05	0.000361492
Cs3g25130	2.72858	0.111103	1.09248e-05	0.000371961
orange1.1t00818	-2.84115	0.105516	1.11367e-05	0.000378557
Cs8g16930	-1.18537	5.49364	1.13121e-05	0.000383269
Cs1g11080	2.86626	-0.030108	1.13455e-05	0.000383775
Cs1g19170	-4.70972	-0.878754	1.17351e-05	0.000396313
orange1.1t02246	-1.08712	8.92024	1.19635e-05	0.000403372
Cs1g02380	-3.42128	-0.0528467	1.21956e-05	0.00040987
Cs3g05310	4.43593	-1.0979	1.23922e-05	0.000415808
orange1.1t03602	1.29526	5.72752	1.24648e-05	0.000417572
Cs3g06380	-1.58407	2.66901	1.26658e-05	0.000423625
Cs1g15120	-1.12294	3.93788	1.36853e-05	0.000456256
Cs5g31180	-2.36515	2.98501	1.3747e-05	0.00045687
Cs6g15610	-1.52784	5.16524	1.37797e-05	0.00045721
Cs3g26020	-1.74218	1.5919	1.38728e-05	0.000459566
Cs5g13450	-2.1258	1.78784	1.39933e-05	0.000462824
Cs3g05300	-1.65116	3.00282	1.41134e-05	0.000466056
Cs4g08360	-1.55692	5.09256	1.41359e-05	0.000466059
Cs4g19640	-2.21382	2.87632	1.43369e-05	0.000471197
Cs5g25410	-2.89464	2.94968	1.45391e-05	0.000476339
Cs2g17170	-1.94101	3.50745	1.56681e-05	0.000510917
orange1.1t02389	1.51366	6.91948	1.58218e-05	0.000515123
Cs6g12110	-1.38482	2.86798	1.61902e-05	0.000525477
Cs9g14690	1.08075	4.5577	1.65943e-05	0.000536919
Cs5g01020	-1.14595	3.44063	1.69388e-05	0.000546368
Cs1g02370	1.34952	3.11634	1.71568e-05	0.000551692
Cs5g24700	2.24652	0.499142	1.75216e-05	0.000562553
orange1.1t02004	1.03965	7.69573	1.76101e-05	0.000563657
Cs1g03570	-1.53126	2.18378	1.79855e-05	0.00057479
orange1.1t05709	-1.77707	1.2792	1.83319e-05	0.000584354
Cs2g08000	-1.85112	2.34819	1.83481e-05	0.000584354
Cs8g16840	-3.54321	-0.172165	1.83689e-05	0.000584354
orange1.1t00542	-1.66225	4.87583	1.84944e-05	0.000587452
Cs5g28330	-1.37444	5.9016	1.87442e-05	0.00059448
Cs1g21610	2.02038	0.946128	1.90668e-05	0.000603792
Cs7g22930	-2.52051	1.76395	2.02549e-05	0.000638503
Cs2g24530	-1.58145	3.11666	2.0318e-05	0.000639525
orange1.1t04786	-1.0746	4.41068	2.12736e-05	0.000668593
Cs9g18240	-3.28294	1.66958	2.15514e-05	0.00067577
Cs3g04340	-1.42767	2.71872	2.15668e-05	0.00067577
orange1.1t03183	-1.37132	3.12015	2.16001e-05	0.000675797
Cs1g16030	-1.48631	2.30783	2.22506e-05	0.000692205
Cs7g19780	1.20135	3.78013	2.22574e-05	0.000692205
Cs9g15750	-2.43656	0.459674	2.24083e-05	0.000695396
Cs8g15600	3.39587	-0.55862	2.29139e-05	0.000708394
Cs9g18780	-2.18583	1.32926	2.30462e-05	0.000711428
Cs3g05115	1.62005	2.04755	2.33594e-05	0.000717907
Cs7g12950	-3.59206	-0.385328	2.34979e-05	0.000721097
Cs3g10430	1.47665	4.59671	2.37494e-05	0.000727744
Cs6g08900	2.23627	0.356185	2.39924e-05	0.000733036
Cs2g03950	1.87807	1.59912	2.43393e-05	0.000741459
Cs3g26220	-1.35379	4.67843	2.44786e-05	0.000744615
Cs2g31130	-1.9361	1.36826	2.45704e-05	0.000746317
Cs1g07380	-1.84043	3.17329	2.46349e-05	0.000747188
Cs3g01460	-1.14102	6.7857	2.48017e-05	0.000751154
Cs4g18090	1.51313	5.83572	2.52179e-05	0.000762648
Cs3g02370	-2.17033	0.260422	2.5586e-05	0.000772661
orange1.1t01955	-2.29656	1.48504	2.56512e-05	0.000773508
Cs4g10140	-1.29094	5.41745	2.60494e-05	0.00078438
orange1.1t03972	-4.99145	-0.662354	2.67587e-05	0.00080289
Cs9g17650	-2.2922	0.273599	2.72368e-05	0.000812026
Cs1g09635	-1.04775	4.16154	2.72403e-05	0.000812026
Cs2g14880	-4.44831	-1.06704	2.73674e-05	0.000814648
Cs1g15990	-1.63925	3.0588	2.74424e-05	0.000815037
Cs3g12130	1.23909	4.2099	2.74587e-05	0.000815037
Cs9g08070	-1.03134	5.32127	2.77667e-05	0.000823007
Cs5g32370	-1.23033	3.52619	2.78344e-05	0.000823842
Cs2g21745	-1.63886	1.49332	2.8072e-05	0.000829696
Cs6g17360	-1.09618	6.20677	2.83356e-05	0.000835119
Cs6g22210	-1.2199	3.37095	2.88023e-05	0.000847674
Cs5g12040	-1.54128	4.17223	2.9053e-05	0.000853845
Cs5g21250	2.11208	1.53525	3.07279e-05	0.000901798
Cs5g27170	-4.54057	-1.00149	3.08649e-05	0.000904544
orange1.1t03583	-1.27812	4.07196	3.12331e-05	0.000914051
Cs2g22640	-2.20999	0.363035	3.2284e-05	0.000942161
Cs8g10860	-1.09324	6.89091	3.24078e-05	0.000944448
orange1.1t02445	-1.63707	3.28952	3.26471e-05	0.000950094
Cs2g29060	-1.21718	5.84448	3.27798e-05	0.000952625
Cs7g10790	-2.0622	0.623759	3.3043e-05	0.000958936
Cs2g07410	-1.80166	3.44629	3.39126e-05	0.000982804
Cs2g28260	-1.11921	4.02525	3.45038e-05	0.000997164
Cs8g20580	-1.00876	5.14022	3.46872e-05	0.00100108
Cs4g15330	-1.01889	5.18472	3.55804e-05	0.00102402
Cs4g13890	-1.02072	6.37716	3.61286e-05	0.00103693
Cs2g20590	1.55485	9.34453	3.64133e-05	0.00104198
Cs6g08070	3.19148	-0.708691	3.64545e-05	0.00104198
Cs2g05030	-2.7679	2.47715	3.66877e-05	0.00104721
Cs8g21070	-1.40719	1.98039	3.68221e-05	0.00104961
Cs1g05070	-1.14003	6.78409	3.71135e-05	0.00105647
Cs3g01530	1.23335	7.26506	3.7868e-05	0.00107614
orange1.1t01321	-1.12618	7.72451	3.79594e-05	0.00107614
Cs4g07840	1.01213	8.08756	3.88962e-05	0.0011012
Cs5g24820	-4.73494	2.81067	3.89637e-05	0.00110161
Cs4g07790	1.21027	4.59764	3.99479e-05	0.00112486
Cs2g07700	1.09338	8.50294	4.12372e-05	0.00115715
Cs1g04680	-3.83437	-0.90904	4.13099e-05	0.00115715
Cs9g06830	-4.06854	-0.739156	4.13105e-05	0.00115715
Cs2g04250	1.13648	3.98147	4.1317e-05	0.00115715
Cs5g02940	1.32576	5.4703	4.13914e-05	0.00115768
Cs3g18610	-1.34439	3.06612	4.1588e-05	0.00116162
Cs8g03110	-1.45729	2.62747	4.27022e-05	0.00119115
Cs1g25670	-1.7992	4.40107	4.30268e-05	0.0011986
Cs2g12660	-2.52049	-0.136589	4.36883e-05	0.00121298
Cs1g21810	-1.06681	3.81388	4.38259e-05	0.00121436
Cs1g24490	-1.0708	3.99312	4.43038e-05	0.001225
Cs1g23500	-1.09217	3.4649	4.45461e-05	0.00122779
Cs7g15480	-1.29514	7.3005	4.52314e-05	0.00124339
Cs7g31690	1.75918	1.38208	4.54416e-05	0.00124612
Cs5g29370	-3.79118	-0.540706	4.55677e-05	0.00124612
orange1.1t00510	-1.08007	4.02719	4.55761e-05	0.00124612
orange1.1t04499	-1.1394	7.58709	4.59001e-05	0.00125186
Cs5g16860	1.01035	7.54045	4.71027e-05	0.00128298
orange1.1t03043	1.84197	2.2903	4.72409e-05	0.00128316
Cs5g28460	-1.78825	2.57868	4.76508e-05	0.00129014
Cs1g24440	-1.65381	8.66707	4.81746e-05	0.00130196
Cs3g16430	2.5686	0.680281	4.83274e-05	0.0013044
Cs8g13780	-1.01995	5.11356	4.87172e-05	0.00131322
Cs5g01440	2.4643	0.45378	4.91056e-05	0.00132198
Cs2g07250	-1.95496	6.16026	5.02843e-05	0.00135111
Cs2g07720	-1.09936	5.90341	5.03173e-05	0.00135111
Cs4g01190	-2.36544	2.18861	5.06989e-05	0.00135786
Cs4g02910	1.49096	4.27573	5.1759e-05	0.00138447
Cs5g05040	-2.34417	0.312399	5.25461e-05	0.00140013
orange1.1t05763	-1.84982	1.8881	5.40778e-05	0.00143727
orange1.1t00666	2.099	0.511076	5.65554e-05	0.00149549
orange1.1t03313	-2.07908	3.39928	5.75482e-05	0.00151597
Cs1g03290	-1.4957	4.37134	5.76221e-05	0.001516
Cs1g07420	-1.64126	2.6807	5.78784e-05	0.00152082
orange1.1t02820	2.29827	3.39343	5.97038e-05	0.00156287
orange1.1t03535	-1.50915	2.11078	6.01736e-05	0.0015732
Cs7g04900	-1.71771	4.62201	6.06433e-05	0.00158151
Cs5g10220	1.09581	4.56575	6.10316e-05	0.00158948
orange1.1t02175	1.93962	0.661086	6.11015e-05	0.00158948
orange1.1t01124	3.71267	-0.318547	6.21061e-05	0.00160956
Cs9g01780	-1.4138	4.21145	6.34706e-05	0.00164086
orange1.1t03587	-1.54971	2.0819	6.36018e-05	0.00164222
Cs1g08030	-1.7303	2.35701	6.41161e-05	0.00165345
Cs1g23520	-1.08121	3.91007	6.54612e-05	0.00168397
Cs4g20580	-1.00493	7.39453	6.70707e-05	0.00172207
Cs3g09000	-1.60583	2.94477	6.71074e-05	0.00172207
Cs8g01960	-1.38562	2.83683	6.77088e-05	0.00173536
Cs1g21660	-1.02164	4.38485	6.78687e-05	0.00173732
Cs9g06110	-1.59542	4.01282	7.394e-05	0.00187889
Cs6g09525	-3.21307	2.50344	7.44914e-05	0.00189059
Cs5g13250	5.84343	-1.4463	7.55629e-05	0.00191545
Cs9g02055	1.81208	1.33869	7.67232e-05	0.00194251
orange1.1t02471	-1.12973	3.43893	7.73975e-05	0.0019572
Cs2g10440	-1.33529	4.66154	7.75844e-05	0.00195837
orange1.1t04064	-6.46908	-1.0012	7.99754e-05	0.00201019
Cs7g31010	-1.32644	5.8089	8.01955e-05	0.00201329
Cs5g18500	1.38083	4.29311	8.08983e-05	0.00202693
Cs7g08730	-1.05081	6.30049	8.09365e-05	0.00202693
Cs3g10620	3.38027	1.5491	8.13606e-05	0.00203036
Cs7g16680	-1.28702	3.55302	8.13625e-05	0.00203036
Cs8g01700	-1.27583	3.84994	8.20524e-05	0.00204513
Cs4g04470	-2.32509	0.374757	8.40169e-05	0.00208163
orange1.1t02697	3.64912	-1.06403	8.40385e-05	0.00208163
Cs7g16990	-1.61788	2.89147	8.40953e-05	0.00208163
Cs7g10940	1.31436	2.44511	8.4922e-05	0.00209908
Cs3g14130	-2.43244	-0.0849438	8.63568e-05	0.00212949
Cs6g09430	1.0232	5.85105	8.65709e-05	0.00213224
orange1.1t00177	-1.49331	2.74788	8.6905e-05	0.00213794
Cs7g30820	1.20152	3.70998	8.72965e-05	0.00214252
Cs2g19430	-1.13988	4.80958	8.74906e-05	0.00214475
Cs5g32270	-1.13559	4.48467	8.88653e-05	0.00217589
Cs2g22040	-1.12907	5.711	8.98695e-05	0.00219532
Cs6g07140	1.16691	3.90047	9.13469e-05	0.002221
Cs7g26640	-2.75125	2.80928	9.2302e-05	0.002239
Cs4g05660	6.12092	4.51976	9.25494e-05	0.00224239
Cs3g24260	2.14743	3.43263	9.33353e-05	0.0022588
Cs3g19760	1.04433	6.21051	9.39084e-05	0.00227003
orange1.1t00643	-1.54609	6.54512	9.40962e-05	0.00227194
Cs9g11050	-1.16037	3.9885	9.68597e-05	0.00232787
Cs4g01240	-1.61274	1.91693	9.93528e-05	0.00237956
Cs3g18330	1.43794	3.89289	0.00010228	0.00244281
Cs7g25250	-5.14743	-0.54017	0.000102399	0.00244281
Cs2g03270	1.17683	5.65508	0.000102463	0.00244281
Cs7g04390	1.5378	5.96398	0.000102707	0.00244582
Cs7g30510	-1.13861	3.18006	0.000105981	0.00251519
Cs3g20410	-1.98354	3.23486	0.000107029	0.00253716
Cs1g20180	-1.43481	3.84641	0.000111096	0.00262597
Cs2g08550	-1.82485	1.12639	0.000112437	0.00265029
Cs2g28800	1.32179	3.97085	0.00011355	0.0026735
orange1.1t01675	-1.2418	7.54825	0.000114471	0.00269213
Cs9g17780	-1.39729	2.9375	0.000115517	0.00270148
orange1.1t01372	-1.47806	2.70012	0.00011616	0.00271044
Cs7g18270	-2.11301	0.816982	0.000116473	0.00271471
Cs8g07030	-1.21835	3.71911	0.000117475	0.00273196
Cs4g07940	1.50405	3.58553	0.000119844	0.00278084
Cs6g12830	-1.22115	4.7779	0.000120082	0.00278327
Cs5g06140	-2.2497	1.44806	0.000121653	0.00281028
Cs1g16830	-1.77737	1.70776	0.000122781	0.00283008
Cs5g03170	-1.47719	1.67435	0.000123352	0.00283696
Cs9g16270	-1.04675	7.54722	0.000123953	0.00284764
orange1.1t03342	-2.0055	0.685667	0.000124983	0.00286184
Cs2g01800	-2.11462	0.715129	0.000126946	0.0029004
Cs6g07420	1.11963	6.35009	0.000127351	0.00290648
Cs6g21000	-1.71074	1.91696	0.000128037	0.00291472
orange1.1t04637	-1.40042	2.64533	0.000128132	0.00291472
Cs3g23860	5.90821	-1.4034	0.000133158	0.00300934
Cs2g31090	-1.90029	2.07887	0.000133771	0.00301665
Cs5g27610	-1.57184	1.6433	0.000135736	0.00305765
Cs7g09640	-1.17607	7.32679	0.000137817	0.00309784
Cs2g17130	-2.07731	2.98744	0.000138498	0.00310979
Cs2g09830	-1.7585	0.89707	0.000139158	0.00312065
Cs4g06040	-2.08715	0.52733	0.000139587	0.00312415
Cs4g02180	-4.29654	-1.1719	0.000141135	0.00315202
Cs5g32610	-2.35543	0.788652	0.000142628	0.00317855
Cs5g22660	-2.24479	-0.018596	0.000143991	0.00320548
Cs3g23360	-1.83225	3.45333	0.000144154	0.0032057
orange1.1t02622	-5.6037	-1.58636	0.00014551	0.00322895
Cs2g17870	-1.04022	4.541	0.000146514	0.00324432
Cs3g25150	-1.03406	3.57837	0.000148043	0.0032679
Cs6g16430	-1.10754	3.54161	0.000148049	0.0032679
Cs9g06360	-1.52186	2.86659	0.000148437	0.00327299
orange1.1t03155	-1.05647	4.18992	0.000148902	0.00327979
Cs4g14050	-1.33828	1.90144	0.000154343	0.00338174
Cs7g30580	-1.06413	6.10254	0.000154724	0.00338654
Cs2g19030	4.04246	-1.36135	0.000155204	0.00339347
Cs7g32150	1.15384	3.99154	0.000155446	0.00339522
Cs7g12820	-2.43317	1.55759	0.000158845	0.00346218
Cs3g04410	-1.49094	2.22239	0.000159516	0.00347317
Cs1g06940	2.28224	0.238753	0.000159713	0.00347385
Cs4g13780	-1.33324	2.92242	0.000159888	0.00347401
Cs9g18950	4.10582	-1.32084	0.000162082	0.00351437
Cs8g12530	-1.1801	4.19115	0.000163559	0.00354271
Cs6g19205	1.09688	4.15593	0.000163818	0.00354463
orange1.1t00072	-1.865	2.91863	0.000168354	0.0036277
Cs1g10925	-1.76656	0.826994	0.000169166	0.00363767
orange1.1t00633	-1.99192	0.515695	0.00017545	0.00375344
Cs1g03890	-2.70228	-0.265739	0.00017646	0.00377117
orange1.1t03142	-2.69535	2.95943	0.000176882	0.00377633
Cs2g05220	3.69797	-1.0306	0.00017853	0.00380761
Cs2g23260	-1.61609	3.70461	0.000181035	0.00385708
Cs4g02820	-1.75859	2.93867	0.000184796	0.00392117
orange1.1t01646	5.54447	-1.63294	0.000188568	0.00399308
Cs5g32740	2.44284	6.81784	0.0001889	0.00399604
Cs1g16390	1.67443	1.08869	0.000196873	0.00414369
Cs9g17750	-1.02841	6.41228	0.00020343	0.00426446
Cs3g06640	-1.40469	2.75552	0.000206275	0.00431975
Cs7g19070	5.77628	-1.49038	0.000207653	0.00434424
Cs1g03260	-2.38502	-0.493856	0.000208211	0.00435154
Cs9g05370	-1.58122	2.01092	0.000208888	0.00436132
Cs7g30860	-1.69774	0.560741	0.000226386	0.00469841
Cs3g08810	-1.57495	1.27323	0.000227123	0.00470902
Cs2g10790	-1.37832	5.03344	0.000228471	0.00473225
Cs2g22810	-1.70932	0.743885	0.000229296	0.00474462
Cs7g24920	1.75965	2.35659	0.00023459	0.0048368
Cs5g18320	-1.89034	0.789664	0.000234679	0.0048368
Cs4g09910	-2.89028	-0.285338	0.000237135	0.00487777
Cs8g01290	-1.99121	0.624794	0.000237724	0.00487866
Cs5g01770	-1.14878	3.0608	0.000237881	0.00487866
Cs9g04050	2.91468	-0.467025	0.000241146	0.00494007
Cs2g11770	-1.26069	4.62297	0.000241349	0.00494007
Cs1g02750	6.69216	-0.844981	0.000241725	0.00494291
Cs7g26870	2.884	-0.489467	0.000242262	0.00494693
Cs4g06170	-1.51474	2.50327	0.000248475	0.00505118
Cs3g08550	1.40766	2.348	0.000248845	0.00505379
Cs8g05940	-1.45944	3.84636	0.000249568	0.00506353
orange1.1t01469	-1.63214	4.43376	0.000251232	0.00509234
Cs9g10630	-1.04596	5.95281	0.000253827	0.00513993
Cs5g02920	3.56066	-0.184193	0.00025601	0.00517911
Cs3g18450	-1.76605	0.940192	0.000258338	0.00522114
orange1.1t01992	-1.55257	1.7858	0.00025869	0.00522317
Cs2g04590	-1.97687	0.192663	0.000261654	0.00527281
Cs8g08810	-2.59386	0.580136	0.000263202	0.00529889
orange1.1t01365	-1.59189	1.36202	0.000265831	0.00533635
Cs3g22910	-1.1744	5.66319	0.00026652	0.00534039
Cs6g21530	-1.00368	3.97943	0.000267003	0.00534443
Cs7g30290	-1.11887	4.72377	0.000275437	0.00549213
Cs4g19060	-1.15619	5.52694	0.000278602	0.00554992
Cs3g11620	1.08389	3.8582	0.000281288	0.00559809
Cs3g11170	1.19167	3.04994	0.00028296	0.00562062
Cs1g02270	1.65459	1.81642	0.000285264	0.00565562
orange1.1t05200	-1.46696	1.93	0.000303872	0.00598361
Cs3g15420	-1.87961	2.32596	0.000304106	0.00598361
Cs3g21030	-1.84084	0.614128	0.000305076	0.00599416
Cs9g07420	-1.10849	6.44047	0.000305317	0.00599416
Cs5g05850	-1.01882	2.95016	0.000307867	0.00603483
Cs4g17830	-1.0365	3.53772	0.00030883	0.00604801
Cs9g11480	-1.05242	8.45555	0.000309615	0.00605769
Cs7g08330	-1.63293	1.05127	0.000310265	0.00606472
Cs9g02840	-1.65353	3.08079	0.000317209	0.00617728
Cs7g08300	-1.09465	2.84689	0.00031911	0.00620849
Cs6g21330	-1.42472	2.84709	0.000321047	0.00624036
Cs2g18160	-1.25315	2.34002	0.000322407	0.00626004
Cs5g01990	-1.71573	2.50205	0.000322661	0.00626004
orange1.1t01595	-5.07497	1.75817	0.000323561	0.00627166
Cs6g11440	-4.18932	-1.24509	0.000324451	0.00628307
orange1.1t04139	1.00575	6.68806	0.000325991	0.00630703
Cs7g25760	4.16796	-1.2808	0.000327617	0.00632675
Cs2g22200	-1.85177	1.84731	0.0003326	0.00640321
Cs6g03340	-1.12266	3.9682	0.000332806	0.00640321
Cs2g22820	-1.18317	2.87056	0.000340238	0.00652211
Cs1g04870	1.53891	7.73495	0.000340748	0.00652477
orange1.1t01586	-5.52476	-1.63486	0.00034108	0.00652477
Cs3g05330	-5.52476	-1.63486	0.000341316	0.00652477
Cs4g20300	-2.08587	0.337974	0.000341691	0.00652596
Cs2g09310	6.8357	-0.733602	0.000343315	0.00654496
Cs2g06470	-1.88978	3.43354	0.000343681	0.00654595
Cs3g13540	-2.53759	-0.386148	0.000344688	0.00655875
Cs4g17900	1.14186	2.97719	0.000345424	0.00655875
Cs5g25690	1.02793	5.65672	0.000345612	0.00655875
Cs8g14840	-1.58641	1.11193	0.000347606	0.0065906
Cs3g07060	-3.15184	-1.00145	0.000348482	0.00659521
Cs6g18920	-1.29892	3.27136	0.000350649	0.00660621
Cs5g08380	-1.92391	1.23132	0.000357306	0.00670133
Cs5g12370	-5.4374	-1.68579	0.00035927	0.00672735
Cs8g16650	-2.16957	1.34953	0.000360713	0.00674702
orange1.1t02032	-1.50076	1.78513	0.00036505	0.0068159
Cs9g06790	-2.12703	0.299233	0.000365693	0.00682179
orange1.1t02045	-1.61456	6.52083	0.000366363	0.00682819
orange1.1t03998	1.11529	3.98129	0.000368811	0.0068432
Cs8g05670	-1.11721	4.06363	0.000375426	0.00694122
Cs2g17860	-1.27228	2.50748	0.000376057	0.00694238
Cs2g14720	-1.05957	6.44086	0.000376155	0.00694238
Cs3g14690	4.10771	-1.32035	0.00038259	0.00702381
Cs3g01120	-1.25033	4.71333	0.000391237	0.00714478
orange1.1t01780	-1.78569	2.25669	0.000406044	0.00738929
Cs1g06910	1.04198	5.35012	0.00040719	0.00740019
Cs7g12850	-1.64037	2.52801	0.000407353	0.00740019
Cs3g01140	-1.7854	2.45155	0.000409099	0.00741896
Cs5g34800	-2.40336	-0.344742	0.000411582	0.00745751
Cs5g10250	-2.42341	-0.208555	0.000413452	0.00748488
orange1.1t00386	1.81521	5.93874	0.000416225	0.00752853
Cs5g27370	-1.24531	2.58163	0.00041694	0.00753494
Cs9g06950	-3.87024	-1.44883	0.000420492	0.00759254
Cs3g11490	-2.73796	-0.766101	0.000423518	0.00762734
Cs3g12560	-1.99006	1.75496	0.00042409	0.00763105
Cs5g07856	-2.72516	0.0136915	0.000428077	0.00768951
Cs4g12120	-1.19427	4.32235	0.000429558	0.00770947
Cs7g03140	3.97805	-1.40313	0.000430722	0.00772372
Cs8g13800	-1.06982	3.81832	0.000431387	0.00772898
Cs1g26060	-5.43709	-1.68584	0.00043249	0.00773592
Cs5g02810	-1.17817	2.89635	0.000432516	0.00773592
orange1.1t02171	1.15078	2.94457	0.000433596	0.00774858
Cs3g12630	-1.47355	1.2532	0.000435358	0.00776711
Cs7g15500	1.07542	2.90802	0.000435379	0.00776711
Cs8g19990	-1.0955	3.61761	0.000449163	0.00797208
Cs3g13440	-1.19554	5.1862	0.000451744	0.00800424
orange1.1t01371	-2.65552	-0.821242	0.000456271	0.00807074
Cs4g19230	-1.3885	2.85373	0.000459724	0.0081249
Cs2g05640	-1.13993	3.25901	0.000463696	0.00818122
Cs4g14045	-2.36734	-0.246739	0.000466373	0.00821455
Cs1g14450	-1.78957	1.57992	0.000473218	0.00830526
Cs9g13630	-1.31592	4.72981	0.000475282	0.00832378
Cs3g18050	-2.14643	0.683916	0.000483338	0.00844908
Cs4g07930	6.65251	-0.874546	0.000485783	0.0084776
Cs4g15210	2.9776	-0.422903	0.000486466	0.00848242
Cs5g34060	1.34512	2.43406	0.000488239	0.0084991
Cs7g18890	2.26985	-0.340519	0.000488817	0.00850207
Cs7g18030	5.54616	-1.63264	0.000489888	0.0085136
Cs5g11840	3.19082	-0.998099	0.0004903	0.00851366
Cs3g23950	-1.67816	0.91421	0.000492122	0.00853736
orange1.1t00778	2.31139	2.48482	0.000492682	0.00853736
Cs8g14040	-2.05518	1.15529	0.000492895	0.00853736
Cs4g12760	3.42496	1.15902	0.000496084	0.00857834
Cs3g27660	6.35088	-1.09782	0.000498071	0.00860556
Cs1g18410	-2.06039	-0.24588	0.000498773	0.00861056
orange1.1t01261	1.92393	0.788121	0.000499462	0.0086153
orange1.1t04730	-1.03541	5.93097	0.000503966	0.00867862
orange1.1t03092	-1.8415	0.66479	0.000505134	0.00868775
Cs2g27460	-1.47215	1.22671	0.000505329	0.00868775
Cs2g18830	-1.13709	6.1868	0.000506251	0.00869641
orange1.1t05089	5.61463	-0.184489	0.000508463	0.00872003
orange1.1t03904	-3.27923	-1.2837	0.000511255	0.0087535
Cs3g26610	2.40884	-0.242146	0.000513397	0.00878297
orange1.1t01751	1.06195	5.64024	0.000516539	0.00882223
Cs2g04140	-1.89484	0.388157	0.000521037	0.00889176
orange1.1t01320	-1.95623	0.177873	0.000523568	0.00892765
Cs2g10525	-1.51232	2.49155	0.000524031	0.00892823
Cs8g15290	-1.42613	2.25143	0.000525926	0.00893878
Cs7g31190	-1.19221	5.84822	0.000525937	0.00893878
Cs3g16920	-2.43355	-0.610927	0.00052691	0.00894073
Cs5g12460	-1.92193	0.28675	0.000534761	0.00905184
Cs8g20490	-1.76344	2.19264	0.000536422	0.00907259
Cs9g17790	-1.47954	1.35593	0.000539381	0.00911435
Cs7g18050	-1.50036	2.13236	0.000540203	0.00911435
Cs2g12860	-1.39508	1.34403	0.000540776	0.00911663
Cs8g10390	-1.1586	3.89666	0.000551107	0.0092789
Cs2g04480	4.07432	-0.76115	0.000558249	0.00937477
Cs9g10730	-2.58751	0.135646	0.000558338	0.00937477
Cs3g20300	1.19697	2.38377	0.000559612	0.00938264
Cs3g08500	-1.32082	2.37728	0.000560375	0.0093855
orange1.1t01663	-1.0568	5.22111	0.000561783	0.0093855
Cs2g31360	-2.03795	1.50222	0.00056213	0.0093855
Cs1g13690	-1.00412	9.28891	0.000567891	0.00946651
Cs7g32270	-1.18776	2.73723	0.000584576	0.00971356
Cs5g23630	-1.26297	1.77176	0.000589803	0.00977436
Cs3g23080	1.39824	2.53232	0.00059047	0.00977436
Cs3g08290	-2.69899	-0.793075	0.000591027	0.00977436
Cs6g21080	2.32862	-0.186463	0.000596696	0.00985991
orange1.1t03827	-1.1395	4.67129	0.00060248	0.00991811
Cs2g06960	1.15466	3.82594	0.000602598	0.00991811
Cs7g06030	-1.28019	8.04478	0.000607054	0.00998177
Cs7g29250	-2.67629	-0.6117	0.000607999	0.00998177
Cs5g01890	-1.14476	2.21269	0.000610955	0.0100082
orange1.1t04173	-1.03811	5.64467	0.000620398	0.010147
Cs5g29930	1.47679	4.79801	0.000622971	0.0101811
Cs6g11920	1.1543	2.92699	0.000623563	0.0101827
orange1.1t05275	-1.79392	1.45721	0.000625472	0.0102059
Cs1g14800	-2.25803	-0.324199	0.000626301	0.0102115
Cs5g26580	-1.13666	4.06746	0.000629207	0.0102508
orange1.1t03106	-1.72151	1.71335	0.000639661	0.0103967
Cs6g04940	-1.61887	0.505881	0.000649134	0.0105343
Cs2g08210	-1.37153	1.23281	0.000650076	0.0105413
Cs9g05280	-2.65199	0.0747075	0.000655779	0.0106084
Cs2g16460	-1.92905	-0.0678946	0.000674099	0.0108633
Cs2g05000	-2.32049	-0.686486	0.000678003	0.0109177
Cs6g13770	-2.05436	0.247366	0.000679604	0.0109351
Cs7g20260	-5.4389	-1.68551	0.000681732	0.0109608
orange1.1t00760	2.74832	-0.260687	0.000683072	0.0109739
Cs1g25680	-2.46987	1.92764	0.000698452	0.0111865
Cs7g21400	-2.10811	-0.427878	0.000703829	0.0112381
Cs4g09550	-1.15246	10.3083	0.000727411	0.0115615
Cs2g27520	1.67724	0.815346	0.0007369	0.0116944
Cs8g01650	2.86389	-0.0297785	0.000751014	0.0119003
Cs5g06150	-2.9465	-1.13562	0.000753982	0.0119382
Cs4g15730	1.52081	1.83	0.000773844	0.0122249
Cs3g05870	-1.31254	1.44172	0.000778594	0.0122906
Cs3g11260	5.3668	-1.73635	0.000780948	0.0123184
Cs3g16790	5.62746	-1.58361	0.00078367	0.012352
Cs2g04980	-1.10815	3.03595	0.000791175	0.0124514
Cs7g18160	-1.53736	0.665093	0.000793632	0.0124713
orange1.1t06016	-5.43861	-1.68556	0.000797746	0.0125265
Cs2g29990	4.4398	-1.09735	0.000800514	0.012551
Cs8g14810	-1.25391	1.73383	0.000802375	0.0125613
Cs7g26900	-1.84828	1.49818	0.000803174	0.0125644
Cs2g22630	-1.99905	-0.102134	0.000810762	0.0126736
Cs7g22760	1.49755	1.24624	0.00081757	0.0127608
Cs8g02890	-2.17702	-0.068329	0.00082589	0.012881
Cs5g32090	1.35468	2.16649	0.000827218	0.0128921
Cs8g05870	2.06537	-0.0804703	0.000828792	0.012907
Cs7g08260	-2.739	-0.765282	0.000832783	0.0129498
Cs7g18230	-1.14398	3.3187	0.000839524	0.0130229
Cs1g01850	-1.81175	0.493963	0.000841314	0.0130338
Cs7g03070	1.1422	2.84331	0.000846029	0.0130761
Cs2g24030	-1.04305	3.24059	0.000846556	0.0130761
Cs5g26710	2.10222	2.7528	0.000849837	0.013117
Cs5g21870	2.22336	1.29406	0.000850462	0.013117
orange1.1t04174	-2.006	0.684253	0.000866036	0.0133178
Cs9g13050	-1.11577	4.18003	0.000869408	0.0133499
Cs7g19830	2.25073	4.32589	0.000873503	0.0133935
Cs7g02120	-2.42966	0.843767	0.000873532	0.0133935
Cs8g01970	-1.51249	1.67925	0.000877961	0.0134515
Cs5g03530	3.75878	-1.53678	0.000883786	0.0135258
Cs6g08390	1.19339	2.3603	0.00088411	0.0135258
Cs3g17190	1.13682	3.20236	0.000891589	0.0136015
Cs5g20190	-5.25063	-1.79236	0.000891668	0.0136015
Cs6g01270	-4.12614	-1.28442	0.000892368	0.0136022
Cs6g09480	1.67973	1.79783	0.000927336	0.0141002
orange1.1t04627	-1.86973	0.979674	0.000927791	0.0141002
Cs4g03720	-1.66561	1.88294	0.000928336	0.0141002
Cs6g10640	-1.43353	2.78391	0.000929206	0.0141002
Cs1g17390	-1.03692	6.88023	0.000929576	0.0141002
Cs7g26470	-1.77783	0.571772	0.000931061	0.0141095
Cs9g07440	-1.06779	2.90987	0.000933878	0.0141316
Cs5g12220	-2.28641	-0.42721	0.000940164	0.0141958
Cs6g15040	1.25691	4.32832	0.000950845	0.0143363
orange1.1t00121	-2.77677	-0.970108	0.000956178	0.0144063
Cs1g16273	-2.73809	-0.766292	0.000957512	0.0144133
Cs2g04490	1.39526	4.73731	0.000958027	0.0144133
Cs7g01360	-1.58964	0.888473	0.000961	0.0144476
Cs3g23540	-1.4825	2.51166	0.000967965	0.0145097
Cs9g14190	-1.07996	4.15611	0.000968585	0.0145097
Cs3g02435	-5.25054	-1.79238	0.000973193	0.0145365
orange1.1t02191	-1.77456	1.30459	0.000986919	0.0146994
Cs5g25060	-4.0051	-1.36412	0.0010031	0.0149191
Cs7g06780	-6.01399	-1.32317	0.00100814	0.0149726
Cs3g10420	1.4527	1.08033	0.0010115	0.0150012
orange1.1t02755	-1.11161	4.98856	0.00101567	0.0150523
orange1.1t00787	2.40962	0.862347	0.00102793	0.0151908
Cs3g08350	-1.92534	0.350147	0.00103108	0.0152265
Cs5g14050	1.14931	2.09936	0.00103502	0.0152738
Cs2g29780	-1.48939	2.27496	0.0010363	0.015282
Cs7g07910	-3.79941	-1.49287	0.00104433	0.0153677
Cs5g27950	-2.53667	-0.539426	0.00104809	0.0154122
Cs4g03960	-1.22553	3.17402	0.00105842	0.0155531
Cs2g15700	1.43321	1.17672	0.00106089	0.0155784
Cs2g21150	-1.18535	3.32232	0.0010687	0.0156489
Cs5g03070	-1.24543	2.84114	0.00107669	0.0157328
orange1.1t04035	1.10652	3.61754	0.00108509	0.0158223
Cs2g23030	-1.24565	1.95556	0.00108648	0.0158291
Cs2g04700	-1.63788	1.49208	0.00108761	0.0158291
orange1.1t00851	1.13144	4.39452	0.00109088	0.0158291
Cs9g08380	-1.51938	1.33735	0.00109288	0.0158321
Cs8g20740	-2.37102	0.480962	0.00109958	0.0159
Cs1g25660	-5.34691	-1.7381	0.00111269	0.0160562
Cs3g14610	1.22335	4.17557	0.00113688	0.0163487
Cs7g18240	-1.5265	2.06534	0.00113986	0.0163802
Cs2g12730	-1.78825	0.955549	0.00114442	0.0164231
Cs4g05370	-5.31159	2.1366	0.00115884	0.0165946
Cs8g14600	-1.1084	3.11439	0.00116035	0.0165946
Cs5g02200	-1.17475	2.51568	0.00117404	0.0167602
Cs7g04120	-1.93364	0.0909422	0.00117435	0.0167602
Cs7g27640	-1.06344	4.89046	0.00117558	0.0167664
Cs7g21420	-1.92945	0.013402	0.00118078	0.016829
Cs7g05920	-1.63227	1.05224	0.00118596	0.0168868
Cs7g03680	-1.76267	1.04489	0.00118646	0.0168868
Cs2g19470	-1.38822	1.42965	0.00122782	0.0173969
Cs1g23770	-1.10022	2.99022	0.00122792	0.0173969
Cs1g23040	-2.82274	0.0903075	0.00127159	0.0179317
Cs5g17950	-5.3487	-1.73782	0.00127316	0.0179317
Cs3g06420	-1.72797	-0.0510148	0.00127924	0.0179983
orange1.1t02398	-1.4623	1.34451	0.00128349	0.0180338
Cs3g06780	-1.15209	3.92546	0.00129434	0.0181549
Cs6g10460	-2.47772	-0.938695	0.00129472	0.0181549
orange1.1t05133	-1.09845	4.17022	0.00129821	0.0181916
Cs1g14920	2.08048	1.79981	0.00130783	0.0183018
Cs7g14760	-1.32574	4.55296	0.00130933	0.0183103
Cs5g01410	-1.44876	1.15636	0.00131882	0.0184189
Cs1g24225	-5.95523	-1.3635	0.00131886	0.0184189
Cs6g16020	1.79377	0.291868	0.001325	0.0184895
Cs4g12460	3.52834	-0.762028	0.00133033	0.0185419
Cs6g10340	-1.6788	0.400989	0.00133289	0.0185651
Cs1g12480	-1.21958	2.3403	0.00133467	0.0185713
Cs7g10890	4.17281	0.90606	0.00133511	0.0185713
Cs2g01150	-1.31176	1.59852	0.00134443	0.018651
Cs7g28190	-1.22766	1.61354	0.00135123	0.0187204
orange1.1t00964	-4.74077	-0.851076	0.00135413	0.0187311
Cs7g30610	-1.04585	4.24521	0.00135441	0.0187311
orange1.1t03154	-1.25572	2.58819	0.00135617	0.0187311
Cs1g22200	-1.24176	6.2218	0.00136724	0.0188542
Cs6g16780	-1.25039	3.52424	0.00136927	0.0188575
Cs9g04630	1.12901	4.27131	0.00137337	0.0189016
Cs6g07700	2.40516	4.03964	0.00138979	0.0190896
orange1.1t01744	-1.9158	-0.344256	0.00140439	0.0192775
Cs7g08080	-1.00572	4.27824	0.00140862	0.0193101
Cs5g02130	1.53787	0.380556	0.00142989	0.0195374
Cs8g04070	-1.59894	0.665757	0.00143704	0.0196094
Cs8g05480	-3.1504	-1.3639	0.00143905	0.0196239
Cs3g04610	-1.03755	2.94301	0.00144292	0.0196639
Cs8g19400	-1.07016	4.90179	0.00145574	0.0198127
Cs5g11300	-1.48917	1.62447	0.00146214	0.0198869
Cs6g10900	1.55291	0.291589	0.00146404	0.0198996
Cs2g25360	-1.10976	2.49872	0.00146657	0.0199211
orange1.1t02225	-2.9477	-1.13551	0.00147334	0.02
orange1.1t02440	-2.59601	-0.345201	0.00147939	0.0200559
orange1.1t05670	-3.64047	-1.58623	0.00149049	0.0201803
orange1.1t02944	-1.3823	1.64467	0.00149291	0.0201999
orange1.1t02182	-3.64074	-1.5861	0.00149802	0.0202428
Cs3g03335	-2.15488	1.75875	0.00149992	0.0202449
orange1.1t00188	-2.17528	-0.635284	0.00150013	0.0202449
Cs7g07420	-1.08069	3.111	0.00150291	0.0202693
Cs7g19180	1.55633	2.85104	0.00151631	0.0204236
Cs5g11620	1.26357	4.31417	0.00153779	0.0206996
Cs5g24220	2.3542	0.760925	0.00155048	0.0208243
Cs7g02360	1.09316	4.39079	0.00155106	0.0208243
Cs6g11010	-2.28839	0.10532	0.00156212	0.0209459
Cs3g20850	-2.82244	-0.938637	0.00157813	0.0211469
Cs7g01640	-1.01689	4.26122	0.00158568	0.0212208
orange1.1t01778	1.96731	-0.15058	0.00159187	0.02129
Cs2g28670	2.8741	-1.20519	0.00159774	0.0213411
Cs5g34390	-1.12108	2.89947	0.00160295	0.021397
orange1.1t02165	1.79988	1.01231	0.00161548	0.0215504
Cs7g03580	-1.67979	0.880206	0.00161919	0.0215722
orange1.1t01154	-1.88541	-0.0177727	0.00165348	0.021959
Cs5g30770	-1.90528	-0.0844826	0.00166628	0.0221008
Cs9g16960	-1.16944	4.42069	0.00167527	0.0222059
Cs3g15670	1.6846	0.381224	0.00167986	0.0222526
Cs2g21750	-2.45083	-0.18981	0.00168894	0.0223334
Cs2g25450	1.48942	1.2392	0.00169486	0.02238
Cs5g13580	4.03268	0.200182	0.00170153	0.0224398
Cs7g22980	-1.13387	2.74098	0.00170551	0.022478
Cs5g08850	1.43667	1.20454	0.00172968	0.0227678
Cs8g20130	3.12619	3.08872	0.00173912	0.0228631
Cs9g13080	-1.7099	-0.136469	0.00174934	0.0229684
Cs4g17095	-1.30669	2.44009	0.00175523	0.0230313
Cs8g04550	1.04624	4.50527	0.00176528	0.0231486
Cs9g11040	-1.96656	0.753732	0.00177054	0.023203
Cs5g34830	-1.19535	3.36785	0.00177664	0.0232683
Cs7g08040	-3.39984	-0.283553	0.00178546	0.0233585
Cs6g20900	-1.14094	3.94673	0.00178577	0.0233585
Cs1g14580	-1.17617	3.60407	0.00180424	0.0235706
Cs5g34280	-2.1205	2.1347	0.00181612	0.0236933
Cs3g19080	-1.01307	2.62139	0.00182834	0.0237958
Cs6g07410	3.67929	-1.58392	0.0018605	0.0241691
Cs9g09915	-2.65371	-0.821539	0.0019005	0.0246119
Cs1g05370	3.67622	-1.58425	0.00192669	0.0248893
Cs7g23830	-2.47653	-0.938811	0.0019284	0.024896
Cs2g28870	-1.91023	0.339352	0.00193681	0.024989
Cs9g10310	-1.53887	2.10153	0.00193847	0.024995
Cs8g05910	-1.72182	2.06618	0.00194876	0.0251121
Cs6g20290	3.03966	-1.09821	0.00196028	0.025245
Cs7g32030	-1.29395	1.20606	0.00196968	0.0253306
Cs7g26690	-1.96018	2.76793	0.00197246	0.0253392
Cs2g24040	2.81685	-0.204701	0.00198126	0.0254366
Cs5g09350	-1.93764	0.163523	0.00198343	0.025445
Cs1g25250	-2.15676	1.59588	0.00198651	0.025445
Cs5g31420	-1.6606	0.105393	0.00198909	0.025445
Cs7g10040	1.40944	1.83318	0.00198993	0.025445
Cs6g12090	-1.81652	-0.227419	0.0020061	0.0256291
Cs5g16770	-2.29719	1.00257	0.00202227	0.0257965
orange1.1t02163	1.62161	2.71386	0.00202291	0.0257965
Cs8g14010	-1.40168	0.92351	0.00202986	0.0258535
Cs5g20440	1.21441	1.33101	0.00204997	0.0260776
Cs5g07515	-2.57036	-0.878357	0.00206657	0.0262408
Cs3g04530	1.48907	0.608259	0.00207618	0.0263467
Cs2g18810	-2.13785	-0.660859	0.0020931	0.0265124
Cs9g07780	-3.79815	-1.49311	0.00209432	0.0265124
Cs8g13570	-1.22307	1.20611	0.00210723	0.0266273
Cs1g14430	-5.24956	-1.79254	0.00213588	0.0269729
Cs5g02420	-1.85221	2.59387	0.00215859	0.0271864
orange1.1t03729	2.26978	2.25061	0.00216497	0.0272248
Cs3g07240	-1.05425	2.67964	0.00217241	0.0273019
orange1.1t02681	2.43633	-0.222241	0.00220796	0.0276404
orange1.1t01518	-1.74548	0.592453	0.00220863	0.0276404
Cs3g08920	-1.13318	2.46788	0.00221391	0.0276898
Cs3g23050	2.6618	1.26929	0.00221988	0.0277478
Cs6g19710	-1.37618	1.83134	0.00223029	0.0278446
Cs1g12430	1.51029	3.87205	0.00223617	0.0278846
Cs1g22415	-1.10942	1.77656	0.00224275	0.0279499
Cs1g21870	-1.70861	1.10493	0.00224975	0.0280203
Cs3g27020	3.67871	-1.58378	0.00226762	0.0282092
Cs1g15840	1.49833	0.304563	0.00234501	0.0290451
Cs8g20150	-5.03456	-1.90773	0.00234513	0.0290451
orange1.1t00549	-2.06314	0.386776	0.00235619	0.029125
orange1.1t03694	1.28543	2.74135	0.00236738	0.0292088
Cs9g16220	4.79596	-0.187591	0.0023676	0.0292088
Cs8g05840	-1.70659	0.135563	0.0023884	0.0294305
Cs3g01750	-7.46443	-0.207477	0.0023911	0.0294464
Cs8g03830	2.28607	-0.0136586	0.00242332	0.0298256
Cs9g10150	1.71297	0.499777	0.00245514	0.0300928
orange1.1t04394	-1.89148	1.20411	0.00250387	0.0305821
Cs8g18310	-1.20505	2.42164	0.00251377	0.0306851
Cs4g11440	1.69217	1.35827	0.00259236	0.0314969
Cs3g20450	-1.4888	0.220261	0.0026089	0.0316424
Cs2g16970	-2.95225	-0.850567	0.00262005	0.0317591
Cs5g08630	-1.33732	2.35749	0.0026416	0.0319831
Cs3g10320	-1.99557	0.337464	0.0026475	0.0320359
Cs3g03620	1.81416	1.68823	0.00265984	0.0321666
Cs4g01180	-3.8737	-1.44852	0.00266463	0.0322059
Cs6g05210	-2.11746	0.714365	0.00266966	0.0322172
Cs2g31410	5.7787	-1.4901	0.00267034	0.0322172
Cs3g08400	-1.03576	3.77883	0.00267176	0.0322172
Cs2g22090	-5.03328	-1.90794	0.00267605	0.0322317
Cs7g16220	-1.74703	-0.190025	0.00271782	0.0326787
Cs9g02980	-1.36016	1.61238	0.00273292	0.0328408
Cs2g22770	-1.71692	0.376425	0.00273497	0.0328418
Cs5g28620	-1.02122	2.62618	0.00273616	0.0328418
Cs5g11400	3.67985	-1.58385	0.00273974	0.0328659
Cs2g03420	-1.32251	1.44826	0.0028147	0.0336875
Cs8g04880	-1.27357	0.897665	0.00282028	0.0337349
orange1.1t01956	1.28581	2.6998	0.0028366	0.0338911
Cs2g08020	3.67748	-1.584	0.00284811	0.0340092
Cs2g28140	-1.14763	2.77115	0.00285973	0.0340894
Cs1g24240	-1.92967	1.01991	0.00286255	0.034094
Cs2g25130	1.52228	1.01122	0.00287238	0.0341424
Cs3g22170	2.5396	0.16973	0.00291461	0.0344983
Cs6g16120	-1.72029	-0.208127	0.00293728	0.0346962
Cs7g19740	-2.57154	-1.10135	0.00294464	0.0347437
orange1.1t01977	-1.14636	2.58597	0.00294681	0.0347497
orange1.1t02903	1.58033	1.25299	0.00297308	0.0350198
Cs1g24210	1.80939	0.833123	0.00310223	0.0363631
Cs8g02390	-1.28728	1.29378	0.00310283	0.0363631
Cs5g18420	1.97762	-0.657531	0.00311442	0.036458
orange1.1t01872	-1.52161	0.571056	0.00312741	0.0365484
Cs2g09410	-1.25133	1.85839	0.0031418	0.0366565
Cs8g15350	-1.32315	0.63483	0.00323314	0.0375524
Cs2g10140	-1.80882	1.04265	0.00327283	0.0379077
Cs1g08610	2.37172	0.305995	0.00328514	0.0380291
Cs6g15150	1.31604	3.11068	0.00331472	0.0382649
Cs1g16276	-1.59356	0.743147	0.00331896	0.0382649
Cs3g20350	-3.08262	-1.40541	0.00333172	0.0383341
Cs2g03610	-1.1479	3.03469	0.0033498	0.0384784
Cs9g17670	2.325	-0.708806	0.00336933	0.0386601
orange1.1t05958	-1.04131	3.07878	0.00337304	0.0386814
Cs1g22910	1.9117	1.69389	0.00338126	0.0387543
Cs5g07450	2.10987	-0.846933	0.00339505	0.038891
Cs3g06490	-1.52619	0.135183	0.00344687	0.0394195
Cs5g21220	2.74919	-1.28148	0.00344952	0.0394237
Cs4g16130	-1.24677	1.60759	0.00349119	0.039839
Cs5g32060	1.03477	2.25634	0.00349421	0.0398516
Cs1g18965	-1.71876	-0.208638	0.00350298	0.0399297
Cs7g15970	-1.06472	2.18052	0.00352804	0.0400986
Cs5g07100	-1.66164	0.753224	0.00352873	0.0400986
Cs6g16980	1.00453	6.52364	0.0035296	0.0400986
Cs5g30645	-1.41858	0.460588	0.00353414	0.0401094
Cs1g23170	1.05996	2.29279	0.00355318	0.0402597
Cs3g16130	2.87354	-1.20485	0.00356582	0.0403153
Cs7g05180	-1.58741	0.233607	0.00357515	0.040355
orange1.1t04609	2.38119	-0.148828	0.00360654	0.0406433
Cs4g13690	-1.21795	1.57056	0.00363954	0.0409488
Cs5g26140	-6.50201	-0.971537	0.00369935	0.0414872
Cs5g18140	-5.88337	-1.40664	0.00372972	0.0417604
Cs3g03350	-1.53974	3.52117	0.00375644	0.042037
Cs2g06290	1.08708	2.18357	0.00376342	0.0420925
Cs5g01240	-2.6347	-0.470494	0.00377305	0.042155
Cs3g12820	-2.06762	-0.849431	0.00378122	0.0422237
Cs7g18060	-1.2337	2.26188	0.00380333	0.0424024
Cs3g11500	-1.59762	-0.136135	0.00382534	0.0426249
Cs2g28640	-2.0119	-0.611065	0.00384115	0.0427098
Cs1g03840	-2.93348	-1.493	0.00386143	0.0428895
Cs5g08360	-1.03215	3.78902	0.00387841	0.0430551
Cs4g08710	-2.01086	-0.611068	0.00389678	0.0431722
Cs5g10240	-2.15268	2.55752	0.00389725	0.0431722
Cs3g22000	-4.91243	-1.96917	0.00392235	0.0434042
Cs6g06240	-1.65166	0.274432	0.00392697	0.0434322
Cs8g01980	-1.38729	1.47089	0.00393879	0.0435399
Cs3g27650	-1.02676	3.01288	0.00396266	0.0437572
Cs5g04260	2.82311	-0.534872	0.00399154	0.0440528
Cs3g06580	1.18832	2.2736	0.00402162	0.0443378
Cs8g04580	-2.70997	-1.28337	0.00402722	0.0443714
Cs2g28820	3.75636	-1.5369	0.00405694	0.0446011
Cs5g25590	-3.11365	7.13537	0.00406946	0.0446761
Cs2g24410	1.42709	0.945658	0.00408558	0.0448295
orange1.1t05411	-1.43695	1.58606	0.00414359	0.0453943
Cs2g24640	-1.0926	3.54707	0.0041561	0.0455074
Cs3g04140	-1.54744	1.25269	0.00415873	0.0455123
Cs3g06820	1.04993	2.7723	0.00419052	0.0457641
Cs5g15860	-1.36005	1.38872	0.00420403	0.0458876
Cs7g12790	-1.91981	-0.246134	0.00421943	0.0460101
Cs5g26630	-1.2874	0.964961	0.00423073	0.0461066
Cs1g05290	1.62968	0.237526	0.00425585	0.0463561
Cs9g08850	1.08678	7.21062	0.00427625	0.0464811
Cs6g07800	-1.89512	0.957596	0.00439268	0.047672
Cs6g08440	-1.54696	0.029637	0.00441697	0.0478609
Cs4g06060	-1.69005	-0.226718	0.00443203	0.0479555
Cs6g08120	-1.23651	1.80012	0.00444977	0.0481161
Cs5g29200	-1.6398	0.472125	0.00446907	0.0482748
orange1.1t03813	-1.3576	3.82335	0.00448806	0.0484548
Cs5g12990	-1.18419	2.40759	0.00449676	0.0485235
Cs1g21130	-1.2299	6.44161	0.00450656	0.0485789
Cs9g07720	1.52152	0.368853	0.00451109	0.0486027
Cs3g20970	1.5115	2.11711	0.00452519	0.0487294
Cs9g16650	3.38168	-1.24209	0.00453027	0.0487589
Cs5g13860	-1.88583	-0.364813	0.00456135	0.0489166
Cs2g11480	-1.9111	-0.449337	0.00463024	0.0494771
orange1.1t02036	5.70648	-1.53594	0.00468428	0.0499777

## Sheet: 210 WTvsMT
Gene_ID	logFC	logCPM	PValue	FDR
Cs3g01585	3.57206	5.78792	6.95644e-49	1.42551e-44
Cs7g02540	4.41465	4.72619	4.31882e-47	4.42506e-43
Cs4g12760	5.77928	4.43936	3.7976e-45	2.59401e-41
Cs3g23440	3.14343	6.40328	2.0502e-41	1.05032e-37
orange1.1t03042	3.97563	4.40655	3.15687e-38	1.29381e-34
Cs3g19060	2.84496	8.55862	5.50613e-38	1.88053e-34
Cs5g25950	4.68519	4.20802	1.10571e-32	3.23689e-29
Cs2g09840	2.79497	5.26018	2.36484e-30	6.05754e-27
Cs2g14940	-2.81086	4.90183	6.66885e-27	1.51842e-23
Cs8g12630	-6.69638	2.54116	1.33e-25	2.72544e-22
Cs3g25140	7.06704	1.7399	8.63693e-25	1.60898e-21
Cs1g22680	2.19996	6.32942	2.41563e-24	4.12509e-21
Cs9g06490	5.73386	3.62062	3.43159e-24	5.40924e-21
orange1.1t01124	4.89466	3.0481	5.4684e-24	8.00417e-21
Cs2g21470	-3.17845	4.68449	1.6228e-23	2.21696e-20
Cs3g14610	3.37018	5.17872	6.20102e-23	7.94196e-20
Cs9g03000	-3.88512	3.58589	9.20747e-23	1.10988e-19
Cs5g10040	-2.0396	7.87565	1.85889e-20	2.11625e-17
Cs9g06870	1.87945	6.18377	5.17317e-20	5.57939e-17
Cs2g07720	3.37722	7.35952	1.0527e-19	1.0786e-16
Cs2g28370	2.55961	5.20191	1.28189e-19	1.25088e-16
Cs1g02750	3.54319	4.59152	1.6512e-19	1.53802e-16
Cs9g17050	2.85751	4.92635	2.23053e-19	1.9873e-16
Cs5g21190	2.49616	4.01536	8.28475e-19	7.0738e-16
Cs7g15480	-2.66864	5.01995	1.077e-18	8.82797e-16
Cs8g17160	1.90864	6.55216	1.18506e-18	9.34012e-16
Cs1g02710	2.34714	3.8663	1.27399e-18	9.66915e-16
Cs5g08340	2.13283	4.70787	1.37291e-18	1.00477e-15
orange1.1t01790	-2.03184	6.83454	1.58652e-18	1.12107e-15
Cs5g30850	2.42775	8.84028	3.71147e-18	2.53518e-15
Cs5g09860	-4.16703	2.52733	5.97621e-18	3.95047e-15
Cs4g06340	2.90219	3.0123	1.72677e-17	1.10578e-14
Cs1g23450	-1.89524	5.29535	2.75183e-17	1.7088e-14
orange1.1t02977	3.21109	3.19064	5.44726e-17	3.2831e-14
Cs3g15460	-2.27732	9.16923	5.79556e-17	3.39322e-14
Cs1g21740	2.18318	4.8861	5.99135e-17	3.41041e-14
Cs9g16640	3.03253	9.54442	1.07476e-16	5.9524e-14
orange1.1t02045	-2.84703	5.34005	1.94404e-16	1.03131e-13
Cs5g25690	-2.04454	5.25082	1.96277e-16	1.03131e-13
Cs9g15430	3.27569	4.01469	2.33602e-16	1.19674e-13
Cs3g10250	2.34892	8.63097	2.7008e-16	1.34987e-13
Cs2g28830	2.14989	6.73881	3.01781e-16	1.47241e-13
Cs7g22420	-2.30725	5.21138	3.10171e-16	1.47814e-13
Cs6g11920	2.38144	3.88865	3.38847e-16	1.5781e-13
Cs2g29430	-2.48985	3.44229	4.28637e-16	1.95192e-13
Cs3g21500	-2.00598	7.24531	4.82394e-16	2.14896e-13
Cs2g29780	3.22038	2.33059	6.27204e-16	2.73461e-13
Cs2g07110	2.22177	5.16035	8.36677e-16	3.57192e-13
Cs2g24730	-2.17029	4.73162	9.70049e-16	4.05678e-13
Cs8g14690	-2.80513	3.95776	2.0409e-15	8.36441e-13
Cs9g18910	2.22591	3.69824	2.71821e-15	1.09219e-12
Cs7g08620	2.15098	9.91024	2.80481e-15	1.10531e-12
Cs1g26650	1.77456	9.10252	4.72235e-15	1.82586e-12
Cs7g27010	1.8535	5.31076	9.03606e-15	3.42902e-12
orange1.1t02608	-2.29829	5.08609	1.24684e-14	4.64551e-12
Cs5g11630	1.65234	6.29849	1.76829e-14	6.47069e-12
Cs9g05220	2.99367	4.64451	1.81169e-14	6.51317e-12
Cs6g20120	2.18145	4.14405	1.972e-14	6.96728e-12
Cs7g31190	-2.17148	4.51359	2.0241e-14	7.03014e-12
orange1.1t01353	-2.22037	5.78127	2.45947e-14	8.27697e-12
Cs8g05460	-1.94418	4.13972	2.46387e-14	8.27697e-12
Cs6g15150	2.46846	4.39538	3.35786e-14	1.10983e-11
Cs5g21250	2.38129	3.18993	3.69806e-14	1.20287e-11
orange1.1t03504	-2.30918	3.34491	3.78549e-14	1.21207e-11
Cs6g02180	-1.80181	5.706	4.5969e-14	1.44922e-11
Cs5g29930	2.00127	5.77184	4.9601e-14	1.54004e-11
orange1.1t02075	-2.55119	3.21049	5.03963e-14	1.54137e-11
Cs4g07930	7.95	0.0728237	5.25327e-14	1.58309e-11
Cs6g17360	-2.18889	4.63388	6.134e-14	1.82171e-11
Cs2g31410	4.20192	1.44465	6.3709e-14	1.86504e-11
orange1.1t01763	-2.16112	4.30551	6.50377e-14	1.87712e-11
Cs2g17260	-2.01858	5.34149	9.67482e-14	2.75356e-11
Cs8g16290	2.65898	7.27187	1.1059e-13	3.10439e-11
Cs5g29050	1.7373	5.34483	1.19823e-13	3.31811e-11
Cs1g26530	-1.70352	6.43055	1.22236e-13	3.33983e-11
Cs5g04290	-1.94052	5.26042	1.44034e-13	3.88362e-11
Cs2g06730	-2.27628	4.19595	1.6229e-13	4.31903e-11
Cs1g20120	2.35976	4.07934	1.65226e-13	4.34077e-11
Cs9g03610	-2.75863	3.07203	1.7413e-13	4.51681e-11
Cs1g26700	1.64627	8.91666	3.27122e-13	8.33617e-11
Cs9g04120	8.5316	0.600914	3.29509e-13	8.33617e-11
Cs7g01400	3.11567	7.57447	3.51671e-13	8.78835e-11
Cs5g12900	1.79663	7.81316	3.88386e-13	9.58893e-11
Cs1g06880	-1.70979	5.60232	4.76985e-13	1.16362e-10
Cs3g23670	1.86875	3.94728	5.79667e-13	1.39747e-10
Cs6g09810	2.4453	3.27248	6.69611e-13	1.59554e-10
Cs5g18710	-1.84143	4.85062	6.79972e-13	1.60161e-10
orange1.1t01192	3.2659	3.62496	6.93778e-13	1.61556e-10
Cs6g07200	-1.98822	7.00828	7.875e-13	1.8132e-10
Cs8g11330	1.76823	8.45854	9.52247e-13	2.16816e-10
orange1.1t04376	2.11745	11.1922	9.74886e-13	2.19531e-10
Cs7g08730	-1.83485	4.81279	1.27128e-12	2.83163e-10
orange1.1t02243	-2.51443	3.01898	2.02603e-12	4.46424e-10
Cs8g03980	-2.91818	2.19264	2.33419e-12	5.04268e-10
Cs6g09960	1.59758	10.4298	2.33776e-12	5.04268e-10
Cs3g18690	-1.82768	5.65678	2.52264e-12	5.38478e-10
Cs5g30500	-1.84837	4.60789	2.56384e-12	5.41631e-10
Cs4g05200	2.41475	6.03907	2.59862e-12	5.43376e-10
Cs2g22390	-1.82595	4.23917	2.80758e-12	5.81141e-10
Cs1g06850	-2.49805	3.13283	2.90954e-12	5.96223e-10
Cs9g09740	1.9614	4.7319	3.12631e-12	6.34299e-10
Cs8g02840	2.39495	8.01235	3.4584e-12	6.94799e-10
Cs6g16900	-1.65842	5.75	4.01033e-12	7.97861e-10
Cs4g18310	-1.81819	7.39244	4.27436e-12	8.38702e-10
Cs2g16900	2.05347	7.52943	4.29747e-12	8.38702e-10
Cs8g05990	1.94652	4.17797	5.24203e-12	1.01339e-09
Cs5g26220	-1.64084	8.27651	5.50332e-12	1.05396e-09
Cs1g18460	1.61411	7.09327	6.23968e-12	1.18392e-09
Cs3g09160	-6.44233	0.422254	7.81147e-12	1.46856e-09
Cs4g05920	-2.02205	3.21231	8.82724e-12	1.64444e-09
Cs3g26410	1.9304	5.98377	1.26895e-11	2.34265e-09
Cs2g07120	2.15396	3.53534	1.32948e-11	2.43248e-09
Cs6g02260	1.53066	6.6202	1.39652e-11	2.53252e-09
Cs3g06580	1.8941	3.83455	1.42514e-11	2.55276e-09
Cs2g28060	-1.80982	5.21061	1.43753e-11	2.55276e-09
Cs8g19420	-2.82135	2.66935	1.44505e-11	2.55276e-09
Cs4g19480	-1.71055	4.43328	1.46585e-11	2.56737e-09
Cs2g16770	1.68842	5.68792	1.50236e-11	2.60902e-09
Cs5g24520	1.96309	7.3262	1.51888e-11	2.61554e-09
Cs2g04080	1.67519	4.66441	2.00986e-11	3.43217e-09
Cs6g11940	1.61163	8.56968	2.10576e-11	3.56622e-09
Cs1g23720	-2.31001	3.30246	2.13746e-11	3.59022e-09
Cs9g07830	-1.54153	6.25593	2.36856e-11	3.94606e-09
Cs3g02580	-2.48836	2.19022	2.5151e-11	4.1564e-09
Cs3g15590	-1.73233	4.6169	2.61134e-11	4.28093e-09
Cs8g19720	2.57441	3.12748	2.83787e-11	4.61537e-09
Cs4g07840	1.66485	7.92764	3.16875e-11	5.11291e-09
Cs1g15970	1.68943	6.3091	3.46294e-11	5.54396e-09
Cs4g07730	2.31503	2.87739	4.33633e-11	6.88838e-09
Cs5g04340	1.34615	6.05398	4.5653e-11	7.19633e-09
Cs5g01970	1.49746	7.60789	4.86402e-11	7.57214e-09
Cs3g09120	-1.45024	7.25265	4.87763e-11	7.57214e-09
Cs2g25470	2.07191	5.56644	5.03336e-11	7.75516e-09
Cs5g15510	1.91443	7.10971	5.07419e-11	7.75973e-09
Cs7g19780	1.66354	4.28177	5.13017e-11	7.78722e-09
Cs2g12130	1.75381	8.01277	5.80638e-11	8.74885e-09
Cs5g25900	1.72849	4.81086	6.7608e-11	1.01126e-08
orange1.1t00508	-1.70089	5.09267	7.02129e-11	1.04261e-08
Cs3g26210	1.88887	6.46234	7.15828e-11	1.05068e-08
Cs5g01440	3.16317	2.42023	7.17816e-11	1.05068e-08
Cs1g01540	1.56397	8.62689	7.24214e-11	1.05252e-08
Cs3g11590	1.75432	4.16509	7.3267e-11	1.05731e-08
Cs9g09530	-1.44257	5.24249	7.8098e-11	1.11915e-08
Cs8g09780	1.79601	7.27072	8.40974e-11	1.19675e-08
Cs2g13440	1.51213	5.17976	8.54181e-11	1.20716e-08
Cs9g16960	-2.16326	3.50513	8.80618e-11	1.236e-08
Cs1g17470	1.38242	6.38323	9.70395e-11	1.35274e-08
Cs4g20420	1.60215	8.45996	1.00554e-10	1.39227e-08
Cs7g06030	-1.84075	5.62016	1.04004e-10	1.43036e-08
Cs5g08140	1.52745	4.28229	1.08334e-10	1.46966e-08
Cs1g17480	1.5556	8.44133	1.08349e-10	1.46966e-08
orange1.1t01385	1.53421	4.7928	1.09013e-10	1.46966e-08
Cs4g09200	-1.63958	4.50201	1.15833e-10	1.5514e-08
Cs9g08750	1.46676	7.46738	1.18137e-10	1.57198e-08
Cs2g10570	1.74731	6.89714	1.20312e-10	1.5906e-08
orange1.1t05396	-2.60743	2.3522	1.30425e-10	1.71325e-08
Cs1g17850	1.34302	5.08104	1.49734e-10	1.95436e-08
orange1.1t02754	1.3592	8.40741	1.60676e-10	2.0839e-08
Cs6g07140	2.41592	4.07785	1.82139e-10	2.33581e-08
Cs7g06840	-1.62637	5.0958	1.82379e-10	2.33581e-08
Cs7g15610	2.63651	5.79136	1.88592e-10	2.40039e-08
Cs1g26640	4.2598	1.00981	2.00406e-10	2.53501e-08
Cs4g03830	-1.84867	3.89431	2.03666e-10	2.56044e-08
Cs7g26410	-1.60049	8.9191	2.12535e-10	2.65565e-08
Cs4g13020	-1.74632	5.75963	2.27739e-10	2.82838e-08
Cs7g06310	-1.77547	6.63112	2.48445e-10	3.06695e-08
orange1.1t01626	1.46049	6.37882	2.7195e-10	3.33514e-08
Cs7g11130	1.47986	5.03379	2.73426e-10	3.33514e-08
Cs5g31180	-4.12792	0.389594	2.87496e-10	3.48601e-08
Cs2g18240	1.46178	4.65535	2.95054e-10	3.55662e-08
Cs8g09090	2.58164	7.01012	3.04905e-10	3.65387e-08
Cs3g23110	1.91972	9.27981	3.10825e-10	3.68808e-08
Cs8g14960	1.48243	10.2728	3.11702e-10	3.68808e-08
Cs1g13530	1.82729	9.42244	3.1316e-10	3.68808e-08
Cs6g12920	-2.3327	2.46518	3.55784e-10	4.15869e-08
Cs7g22610	-1.77518	5.08284	3.57178e-10	4.15869e-08
Cs6g21850	1.30056	10.5638	3.60703e-10	4.176e-08
Cs7g04160	3.3313	1.9359	3.74509e-10	4.31148e-08
Cs7g24730	1.42828	4.73345	3.80064e-10	4.35099e-08
Cs3g25000	-2.29583	3.64167	3.88491e-10	4.41621e-08
Cs1g17860	3.07575	5.59425	3.90072e-10	4.41621e-08
Cs5g12300	-2.50606	2.45701	4.04333e-10	4.55253e-08
Cs6g01980	1.4584	7.39829	4.23243e-10	4.72915e-08
Cs4g09520	1.24097	6.30162	4.24636e-10	4.72915e-08
Cs5g17260	-2.37394	2.05349	4.68215e-10	5.18631e-08
Cs2g10620	-1.3731	4.95885	4.70962e-10	5.18868e-08
Cs7g11415	7.42919	-0.380076	5.09387e-10	5.58201e-08
Cs4g11440	2.03545	3.12934	6.02697e-10	6.56939e-08
Cs1g23520	-2.52457	2.83191	6.18288e-10	6.70368e-08
Cs4g01450	1.33513	9.54813	6.44037e-10	6.94611e-08
Cs1g11350	1.27983	8.25088	6.6243e-10	7.10708e-08
Cs6g18610	-2.75517	3.16121	6.88427e-10	7.34752e-08
Cs8g05970	1.26514	7.81114	7.71757e-10	8.19422e-08
Cs1g24700	-1.74171	3.79411	7.86923e-10	8.31218e-08
Cs5g09930	-2.30871	2.32935	8.00742e-10	8.41477e-08
Cs2g28030	-1.32276	7.50617	8.51991e-10	8.89174e-08
Cs4g01430	1.76267	7.16784	8.54808e-10	8.89174e-08
Cs5g16540	-1.46196	5.36157	9.06441e-10	9.33881e-08
Cs5g27230	1.23122	6.26227	9.06902e-10	9.33881e-08
Cs7g11420	1.32268	6.94439	9.12196e-10	9.34636e-08
orange1.1t00555	1.4667	6.87373	9.23442e-10	9.41451e-08
Cs2g23750	1.61444	8.68548	1.1222e-09	1.13842e-07
Cs4g05900	-4.42636	0.42325	1.13857e-09	1.14414e-07
Cs4g15880	1.46308	7.15154	1.139e-09	1.14414e-07
Cs9g08730	1.27125	6.81869	1.15723e-09	1.15677e-07
Cs8g14280	2.72296	5.84908	1.20619e-09	1.19987e-07
Cs6g10660	2.51956	1.5427	1.36242e-09	1.34491e-07
Cs7g26870	3.75535	1.04503	1.36943e-09	1.34491e-07
Cs2g29810	4.84564	0.166462	1.37169e-09	1.34491e-07
orange1.1t06032	-2.75109	1.6058	1.41241e-09	1.37824e-07
Cs9g05680	-1.48611	4.56925	1.56912e-09	1.52391e-07
Cs8g04000	-3.53311	0.389661	1.62884e-09	1.57445e-07
Cs2g11750	1.3034	5.61677	1.65473e-09	1.58818e-07
Cs3g10110	-4.15278	0.187666	1.65858e-09	1.58818e-07
Cs3g11790	1.48734	4.52638	1.6663e-09	1.58818e-07
Cs9g05010	1.69833	5.16686	1.67525e-09	1.58932e-07
Cs2g10290	-1.85477	3.00758	1.70404e-09	1.60918e-07
Cs6g12410	1.26884	5.3765	1.80676e-09	1.69835e-07
Cs7g09640	-1.96775	6.30671	1.8959e-09	1.76635e-07
orange1.1t02780	2.44014	4.18498	1.89633e-09	1.76635e-07
Cs3g16700	1.19569	7.73252	1.91328e-09	1.77407e-07
Cs1g21920	-2.62506	2.52108	1.98002e-09	1.82768e-07
Cs7g16680	-3.3655	2.79157	1.99576e-09	1.83395e-07
Cs4g07650	-1.79754	3.61461	2.08465e-09	1.90708e-07
Cs6g12430	-1.99304	3.40476	2.22809e-09	2.02924e-07
Cs2g14170	1.88645	3.82462	2.24675e-09	2.03719e-07
Cs9g09180	1.43493	5.14628	2.34115e-09	2.11343e-07
Cs3g23020	-1.50434	5.4221	2.39959e-09	2.15668e-07
Cs6g15280	1.51632	8.02843	2.46176e-09	2.2029e-07
Cs5g16310	-3.07693	4.06971	2.48689e-09	2.21571e-07
Cs5g28560	-1.93948	3.74009	2.54062e-09	2.25378e-07
Cs3g04800	1.76189	3.59667	2.61674e-09	2.31131e-07
Cs4g03740	2.04014	3.68256	2.64489e-09	2.32614e-07
Cs7g30680	-2.36854	2.44596	2.6878e-09	2.35378e-07
Cs5g05260	-1.64576	5.25883	2.81828e-09	2.45152e-07
Cs2g08540	-4.47	1.21146	2.82334e-09	2.45152e-07
Cs6g02360	1.1904	7.66363	2.85917e-09	2.47216e-07
Cs1g17420	1.40825	9.13365	2.98036e-09	2.56611e-07
Cs7g27290	-1.90593	2.72924	3.46276e-09	2.96899e-07
Cs2g31040	-1.82425	3.09712	3.4838e-09	2.97458e-07
Cs7g12410	1.19523	8.45522	3.55002e-09	3.01855e-07
orange1.1t03798	-3.70823	0.537484	3.68143e-09	3.11735e-07
Cs8g12680	1.51797	5.47418	3.86588e-09	3.26006e-07
Cs8g08710	-1.92834	3.39387	4.01009e-09	3.36782e-07
Cs5g13290	2.14469	2.05921	4.12031e-09	3.43933e-07
Cs7g23820	-1.28384	6.03442	4.13438e-09	3.43933e-07
Cs7g19180	2.89321	2.28853	4.14559e-09	3.43933e-07
Cs1g25120	-1.5205	7.98851	4.68892e-09	3.87441e-07
Cs3g21510	-1.50704	4.4637	4.70876e-09	3.87517e-07
orange1.1t01388	5.12531	-0.0433004	4.79724e-09	3.9322e-07
orange1.1t01983	1.20806	5.64858	4.9788e-09	4.06476e-07
Cs4g01490	-2.93781	1.33276	5.25389e-09	4.27233e-07
Cs7g15940	1.23766	6.79315	5.45614e-09	4.41925e-07
Cs4g13160	-1.62705	5.24709	5.58515e-09	4.50594e-07
Cs9g02570	1.36534	5.55789	5.96682e-09	4.79498e-07
Cs4g05340	1.2204	7.23162	6.10218e-09	4.88461e-07
Cs6g09150	-1.25767	8.4131	6.17512e-09	4.92376e-07
Cs3g27490	1.23243	6.54687	6.48924e-09	5.15417e-07
Cs4g17630	1.63089	7.46424	6.64157e-09	5.23547e-07
orange1.1t00643	-2.88377	4.62761	6.6427e-09	5.23547e-07
Cs2g12490	-5.46992	-0.42266	6.87862e-09	5.40064e-07
orange1.1t01397	-2.57028	2.10161	7.28954e-09	5.70142e-07
orange1.1t04983	-1.79545	4.46102	7.41956e-09	5.78105e-07
Cs4g02190	-1.83526	4.98858	7.56878e-09	5.87498e-07
Cs5g25410	-5.34778	-0.523367	7.62608e-09	5.89712e-07
Cs6g03940	-1.29638	6.03073	7.89793e-09	6.08437e-07
Cs7g13740	-1.97675	2.28899	8.40422e-09	6.45016e-07
Cs9g09720	1.53059	4.71372	8.63622e-09	6.60348e-07
Cs6g21840	3.29464	1.52237	8.83762e-09	6.73236e-07
Cs3g03045	-3.5381	0.527769	9.1577e-09	6.95036e-07
Cs6g09640	1.27433	7.22908	9.42221e-09	7.12472e-07
Cs1g24060	-1.24938	6.98305	9.58873e-09	7.20666e-07
Cs3g03350	-2.87634	1.47014	9.61672e-09	7.20666e-07
Cs4g02530	2.64935	2.70251	9.63608e-09	7.20666e-07
Cs2g05350	1.31417	7.54357	1.05645e-08	7.87227e-07
Cs6g05140	-1.52556	6.91224	1.10909e-08	8.23461e-07
Cs6g14250	-1.26205	4.66341	1.17588e-08	8.69894e-07
Cs5g07400	1.23921	7.11651	1.21376e-08	8.9469e-07
Cs3g20040	-1.73376	6.23534	1.23447e-08	9.06695e-07
Cs6g21210	1.21273	7.93846	1.27753e-08	9.34972e-07
Cs8g17030	2.23385	2.52476	1.35986e-08	9.91679e-07
Cs5g08860	-3.69466	0.526687	1.38322e-08	1.00514e-06
Cs2g17980	-2.50365	6.35459	1.40914e-08	1.02036e-06
Cs1g11390	-1.57572	5.11304	1.44272e-08	1.04099e-06
orange1.1t04182	1.51654	11.1791	1.47136e-08	1.05794e-06
Cs2g31390	-1.77356	3.11917	1.511e-08	1.08263e-06
Cs5g32100	1.36443	4.51888	1.52408e-08	1.08595e-06
Cs5g02010	-1.86213	2.86307	1.52623e-08	1.08595e-06
Cs1g15830	-1.37371	5.43981	1.5952e-08	1.1308e-06
Cs5g16830	2.93489	1.78731	1.60029e-08	1.1308e-06
Cs7g12170	1.22416	6.48205	1.60628e-08	1.13113e-06
Cs2g10320	-1.9822	3.52753	1.61794e-08	1.13544e-06
Cs7g13810	1.1323	7.35216	1.67628e-08	1.17237e-06
Cs2g09850	1.26365	5.77113	1.68977e-08	1.17778e-06
Cs5g32090	1.72101	3.1038	1.75513e-08	1.21919e-06
Cs6g18250	1.22295	6.8093	1.82328e-08	1.25984e-06
Cs3g27020	-2.54838	1.76772	1.83154e-08	1.25984e-06
Cs2g27610	-1.53039	8.62818	1.83503e-08	1.25984e-06
Cs9g07670	1.66312	7.8019	1.83824e-08	1.25984e-06
Cs7g13310	-1.3044	8.30279	1.86374e-08	1.27306e-06
Cs9g06130	7.23871	-0.540319	1.88946e-08	1.28634e-06
Cs1g06910	1.18315	5.66556	1.9108e-08	1.29656e-06
Cs2g15520	1.40216	9.38965	1.92414e-08	1.3013e-06
Cs1g25830	-1.43227	5.56846	1.96598e-08	1.32523e-06
Cs7g07200	-1.30259	5.93368	2.07824e-08	1.39631e-06
Cs2g07700	3.42461	9.53649	2.08564e-08	1.3967e-06
Cs8g20570	-1.36469	4.62639	2.151e-08	1.43578e-06
Cs9g14480	2.89436	2.64517	2.35419e-08	1.5663e-06
Cs6g19280	-2.52667	2.99134	2.42762e-08	1.60993e-06
Cs4g11610	-2.29702	1.78077	2.50592e-08	1.65649e-06
Cs4g07410	1.18793	10.373	2.52155e-08	1.66146e-06
orange1.1t01398	-1.44485	5.07678	2.53367e-08	1.6641e-06
Cs2g03080	-3.07255	0.476213	2.70792e-08	1.77287e-06
Cs9g18850	-1.56547	4.12694	2.81759e-08	1.83879e-06
Cs9g07970	-1.60645	4.53925	2.85667e-08	1.85838e-06
Cs1g26070	-1.41928	4.38409	2.90276e-08	1.88238e-06
Cs5g09600	-3.05061	1.93296	3.05659e-08	1.97589e-06
Cs2g15300	-1.15528	5.37647	3.21321e-08	2.0706e-06
orange1.1t00261	-1.51537	5.2759	3.24291e-08	2.08319e-06
Cs2g21360	-1.13811	5.54872	3.27818e-08	2.0956e-06
Cs2g07920	1.30822	4.36794	3.28269e-08	2.0956e-06
Cs2g03270	1.77377	7.07792	3.29886e-08	2.09939e-06
Cs2g21000	2.07245	8.90232	3.45875e-08	2.19433e-06
Cs4g19300	3.07937	2.26296	3.61271e-08	2.28493e-06
Cs2g17170	-3.6634	0.63438	3.62503e-08	2.28566e-06
Cs2g20200	-1.97711	3.40485	3.69311e-08	2.31751e-06
Cs3g01120	-1.75377	3.49849	3.7108e-08	2.31751e-06
Cs1g01500	-1.67121	3.61098	3.72239e-08	2.31751e-06
Cs2g12080	-1.78507	7.4262	3.72508e-08	2.31751e-06
Cs9g18330	-1.28678	7.99783	3.73208e-08	2.31751e-06
Cs6g12830	-1.95887	3.04648	3.78302e-08	2.34204e-06
Cs5g15530	-1.80866	4.84303	3.90377e-08	2.40952e-06
Cs2g26610	-2.98659	1.806	3.94008e-08	2.42463e-06
orange1.1t02800	-2.03957	3.98037	3.95331e-08	2.42549e-06
Cs7g22250	1.17131	7.62951	4.05736e-08	2.48189e-06
Cs5g25680	-1.66168	5.43305	4.16886e-08	2.54251e-06
Cs7g07120	2.16252	3.18697	4.38794e-08	2.66818e-06
Cs2g30320	1.83042	8.09801	4.5475e-08	2.75702e-06
Cs3g23530	-2.37359	1.89081	4.64692e-08	2.80899e-06
Cs4g18790	1.40852	11.4056	5.06857e-08	3.05486e-06
Cs3g22260	-2.35694	2.41989	5.13512e-08	3.08589e-06
orange1.1t02122	-1.83342	3.80412	5.1835e-08	3.10585e-06
Cs9g15010	-1.50621	4.13852	5.23335e-08	3.12659e-06
Cs2g07330	-1.99546	2.92858	5.32442e-08	3.17127e-06
orange1.1t02092	-2.16633	3.04625	5.3391e-08	3.17127e-06
Cs6g15210	-1.74748	4.85445	5.47945e-08	3.24523e-06
Cs3g16510	2.64625	2.69682	5.70631e-08	3.36311e-06
Cs2g17950	1.11149	8.34872	5.71131e-08	3.36311e-06
Cs7g12860	-1.72164	4.01871	5.95646e-08	3.49742e-06
Cs6g15920	1.1487	6.12568	5.99572e-08	3.51041e-06
Cs3g04530	2.78086	1.33214	6.0584e-08	3.537e-06
Cs7g17180	1.0883	6.11598	6.14143e-08	3.57529e-06
Cs5g06920	-1.41508	6.329	6.46749e-08	3.75444e-06
Cs2g25450	2.15443	3.40645	7.13917e-08	4.13265e-06
Cs2g28420	-2.51596	1.44875	7.27049e-08	4.19681e-06
Cs8g16910	1.21625	5.75463	7.30342e-08	4.20398e-06
Cs3g17760	-3.45265	0.690041	7.68959e-08	4.41387e-06
Cs3g26690	-2.18752	1.85881	7.76052e-08	4.44214e-06
Cs6g15140	1.72393	3.52425	8.01049e-08	4.57245e-06
Cs5g16850	1.30473	5.76342	8.72103e-08	4.96421e-06
Cs5g27720	1.09503	7.39581	8.7821e-08	4.98512e-06
Cs7g28970	-2.87414	1.27997	8.97851e-08	5.08253e-06
Cs3g14440	-1.31416	8.87435	9.04552e-08	5.10636e-06
orange1.1t00608	2.23961	2.84903	9.73588e-08	5.46669e-06
Cs5g27560	-1.59236	5.47382	9.73718e-08	5.46669e-06
Cs8g17220	-1.38328	7.3345	9.7706e-08	5.47047e-06
Cs3g16440	1.27248	6.94629	9.89524e-08	5.51088e-06
Cs9g08850	1.48102	7.21346	9.89657e-08	5.51088e-06
Cs7g32200	-2.94522	0.866934	9.95127e-08	5.52632e-06
Cs7g31975	2.0347	1.97251	1.00294e-07	5.55464e-06
Cs6g08260	-2.13415	2.51355	1.01735e-07	5.61926e-06
Cs1g25850	-1.92506	4.57668	1.02208e-07	5.63022e-06
Cs4g20430	1.34575	7.77922	1.03305e-07	5.67541e-06
Cs1g16650	4.03316	0.0729519	1.26505e-07	6.9314e-06
Cs4g12020	-2.25419	2.36965	1.28258e-07	7.00872e-06
Cs1g20180	-1.95973	2.84276	1.29768e-07	7.07235e-06
Cs5g30390	-2.55091	1.90966	1.31105e-07	7.12626e-06
Cs4g12920	-2.50202	1.92204	1.33098e-07	7.21543e-06
Cs7g29730	1.60838	3.98311	1.33523e-07	7.21939e-06
Cs9g07740	1.34013	4.23544	1.36776e-07	7.3758e-06
Cs6g16790	-1.35322	4.61167	1.38831e-07	7.46697e-06
orange1.1t00666	2.18394	2.19926	1.42112e-07	7.62339e-06
Cs9g18660	1.55464	8.08085	1.42483e-07	7.62339e-06
Cs7g19800	1.29239	10.7998	1.43147e-07	7.63897e-06
Cs1g26520	-1.61678	3.50909	1.45215e-07	7.72089e-06
Cs1g14920	2.14697	2.57966	1.45435e-07	7.72089e-06
Cs2g22210	-4.05729	-0.156647	1.46365e-07	7.74174e-06
Cs5g25740	1.71729	3.65018	1.46584e-07	7.74174e-06
Cs3g12230	1.30558	6.51647	1.4982e-07	7.8923e-06
Cs7g12440	1.11121	5.73384	1.52026e-07	7.988e-06
orange1.1t03831	-1.34445	3.85954	1.54766e-07	8.11117e-06
Cs2g24030	-2.3683	1.4333	1.56976e-07	8.20599e-06
Cs7g31010	2.2234	6.73273	1.57499e-07	8.21237e-06
Cs4g16000	-1.47632	5.04875	1.6097e-07	8.36874e-06
Cs8g14150	1.17505	9.0894	1.61596e-07	8.36874e-06
Cs8g13660	-1.30737	5.50435	1.61723e-07	8.36874e-06
Cs2g15735	1.38512	4.04781	1.64302e-07	8.48082e-06
Cs2g11370	1.1137	7.96143	1.69147e-07	8.70894e-06
Cs3g06440	1.72701	7.8052	1.70955e-07	8.77995e-06
Cs4g17340	-1.32816	4.78095	1.72989e-07	8.85003e-06
orange1.1t02992	1.11022	6.79712	1.73183e-07	8.85003e-06
Cs1g15170	-1.72732	3.13506	1.75044e-07	8.92288e-06
Cs6g03280	-1.18368	6.89195	1.7644e-07	8.97172e-06
Cs7g10740	-1.62695	3.12924	1.77311e-07	8.99372e-06
Cs7g19290	1.29656	8.46595	1.79124e-07	9.06326e-06
Cs7g02970	5.67681	0.439954	1.80242e-07	9.08113e-06
Cs4g18270	1.24038	6.96012	1.80364e-07	9.08113e-06
Cs1g21370	-1.74491	3.91409	1.8173e-07	9.11599e-06
Cs2g18250	1.63344	7.08841	1.81946e-07	9.11599e-06
orange1.1t00510	-2.07795	2.76731	1.83723e-07	9.18257e-06
Cs7g18460	-1.09324	5.68442	1.88568e-07	9.40176e-06
Cs8g16750	1.1494	7.82527	1.91116e-07	9.50572e-06
Cs2g21480	-4.17463	-0.383806	1.99527e-07	9.90002e-06
Cs6g18680	-1.36189	4.96686	2.04685e-07	1.01314e-05
Cs5g15350	-1.61623	4.40809	2.14677e-07	1.06004e-05
Cs5g17920	2.81867	7.04602	2.20913e-07	1.08821e-05
Cs3g25470	-1.85891	3.52151	2.32872e-07	1.14437e-05
Cs4g17900	-1.96939	2.90777	2.34728e-07	1.14894e-05
Cs2g23870	2.36664	4.41599	2.34923e-07	1.14894e-05
Cs8g18570	-1.11554	5.19817	2.36931e-07	1.156e-05
Cs3g01460	-1.49184	5.31661	2.43545e-07	1.18315e-05
Cs3g17300	-2.14981	2.42511	2.43651e-07	1.18315e-05
orange1.1t06010	2.0559	1.89216	2.48799e-07	1.20529e-05
Cs3g23040	-1.34668	3.72625	2.49634e-07	1.2062e-05
Cs2g11950	-1.17983	5.82182	2.50163e-07	1.2062e-05
Cs1g23230	-2.20721	2.7406	2.584e-07	1.24299e-05
Cs3g16140	-3.54298	0.25003	2.61165e-07	1.25335e-05
Cs2g23280	-2.65474	4.58676	2.6674e-07	1.27711e-05
orange1.1t02046	-2.03378	3.19835	2.67507e-07	1.2778e-05
Cs2g27100	-2.03916	3.10889	2.78032e-07	1.32498e-05
Cs7g05590	-1.20805	5.56963	2.90823e-07	1.38273e-05
Cs3g12640	-2.3247	1.64324	3.02405e-07	1.43446e-05
Cs5g07700	-1.13047	6.42269	3.05498e-07	1.44302e-05
Cs8g08820	-1.5983	4.50454	3.05616e-07	1.44302e-05
Cs5g17880	1.59766	5.61666	3.13182e-07	1.47534e-05
Cs7g32220	2.24171	10.5015	3.14969e-07	1.48035e-05
Cs9g16680	-1.20279	5.40594	3.28699e-07	1.54135e-05
Cs9g12040	-4.50624	-0.544274	3.32674e-07	1.55643e-05
Cs1g22750	-2.26171	2.046	3.39019e-07	1.5825e-05
Cs5g02910	-2.56695	1.25612	3.47279e-07	1.61725e-05
Cs8g16920	-1.62592	3.26476	3.48043e-07	1.61725e-05
Cs2g05510	-1.16692	5.59345	3.49585e-07	1.62075e-05
Cs5g02340	1.11147	9.15961	3.52507e-07	1.6306e-05
Cs9g17380	1.32971	6.43585	3.56314e-07	1.64386e-05
orange1.1t02409	1.15428	8.8581	3.56977e-07	1.64386e-05
Cs7g28050	1.10608	8.55351	3.63233e-07	1.66892e-05
Cs1g13290	1.27777	5.30515	3.72783e-07	1.70897e-05
Cs7g12100	3.11475	2.26743	3.77403e-07	1.72628e-05
Cs6g01310	1.10424	9.86952	3.90901e-07	1.78157e-05
Cs6g09710	-2.11062	2.65163	3.91329e-07	1.78157e-05
Cs5g10090	-1.12908	5.3073	3.92099e-07	1.78157e-05
Cs7g08190	-1.58791	3.4286	3.95115e-07	1.7913e-05
Cs7g13940	-1.39304	4.68033	4.00509e-07	1.81175e-05
Cs5g30230	-1.08725	7.17352	4.17725e-07	1.88547e-05
orange1.1t03382	1.5451	5.65771	4.22395e-07	1.90235e-05
orange1.1t01993	1.47495	10.8708	4.38919e-07	1.97244e-05
Cs1g23060	-1.70806	3.134	4.40497e-07	1.9752e-05
Cs4g10710	1.19717	5.08281	4.61783e-07	2.06613e-05
Cs3g26940	-1.26967	4.28233	4.63673e-07	2.06679e-05
Cs2g30400	-1.86664	1.85516	4.63948e-07	2.06679e-05
orange1.1t02681	4.17716	0.41718	4.66431e-07	2.07334e-05
Cs4g05490	1.88247	9.49595	4.67669e-07	2.07434e-05
Cs2g29120	1.85687	4.97471	4.81165e-07	2.1296e-05
Cs5g32110	2.95499	4.18803	4.97219e-07	2.19591e-05
Cs1g02690	6.60554	-1.04375	5.02073e-07	2.21258e-05
Cs6g19630	1.41087	6.09828	5.11542e-07	2.24947e-05
Cs3g24280	2.47218	1.07965	5.16697e-07	2.26472e-05
Cs8g02780	-1.34418	7.61612	5.17222e-07	2.26472e-05
Cs4g01630	1.29622	6.34264	5.19471e-07	2.26972e-05
Cs5g10550	1.08949	8.53207	5.20583e-07	2.26974e-05
Cs5g14540	-1.56001	3.94322	5.23252e-07	2.27654e-05
Cs6g16200	-1.34855	4.12899	5.27085e-07	2.28835e-05
Cs1g18290	1.31705	3.94847	5.70156e-07	2.46806e-05
Cs8g18640	-1.32464	4.76899	5.70887e-07	2.46806e-05
Cs6g19210	1.17304	8.38002	5.81634e-07	2.50923e-05
Cs6g12870	1.05488	8.40689	5.93625e-07	2.5465e-05
Cs6g18330	-1.57284	6.14832	5.9384e-07	2.5465e-05
Cs6g05830	-1.04417	6.11641	5.94932e-07	2.5465e-05
Cs1g11380	-2.16846	3.13217	5.95243e-07	2.5465e-05
Cs9g10530	-1.58226	3.51934	5.97334e-07	2.55012e-05
Cs5g09110	-2.40226	1.46063	5.99951e-07	2.55597e-05
Cs3g05810	-1.43758	6.70735	6.05989e-07	2.57633e-05
Cs5g17900	2.12422	5.7518	6.17957e-07	2.62177e-05
Cs6g15770	2.84819	2.06681	6.36823e-07	2.69624e-05
Cs3g16330	-2.03144	2.22454	6.40556e-07	2.70645e-05
Cs5g11340	-1.22126	4.17196	6.54215e-07	2.75847e-05
Cs2g12700	-3.54809	-0.310059	6.55948e-07	2.7601e-05
Cs3g17230	1.01576	6.16793	6.59938e-07	2.7712e-05
orange1.1t00272	-2.74459	0.834502	6.68079e-07	2.79965e-05
Cs4g04050	1.05513	7.52831	6.76859e-07	2.83065e-05
Cs1g08280	1.36753	6.31577	6.80108e-07	2.83845e-05
Cs3g16960	-1.38313	4.16473	6.94788e-07	2.89382e-05
Cs9g05170	1.55094	3.61205	7.0392e-07	2.92591e-05
Cs4g18070	-1.02469	5.45673	7.14197e-07	2.96262e-05
Cs9g09070	-1.33442	3.59537	7.2132e-07	2.98612e-05
orange1.1t03475	-1.3167	6.86598	7.25179e-07	2.99604e-05
Cs3g12830	1.4517	2.96836	7.28644e-07	3.00267e-05
Cs8g18810	-2.45627	1.03323	7.29713e-07	3.00267e-05
Cs6g11950	2.83131	5.86227	7.73431e-07	3.17618e-05
Cs2g04370	-1.9181	5.05588	7.91151e-07	3.24246e-05
Cs3g12850	1.24737	4.25767	7.95893e-07	3.25538e-05
Cs9g05910	-3.06955	1.04021	8.03571e-07	3.28023e-05
Cs8g02960	-1.25669	4.25258	8.20901e-07	3.34432e-05
Cs2g03700	1.01468	6.87714	8.25993e-07	3.35838e-05
Cs1g21000	1.2381	5.13062	8.3418e-07	3.38495e-05
Cs3g26790	-2.8305	3.16137	8.4638e-07	3.42767e-05
Cs3g15530	1.63517	4.32927	8.49932e-07	3.43527e-05
Cs5g04990	-1.17508	4.24419	8.62794e-07	3.48039e-05
Cs7g04050	1.12025	7.22903	8.73127e-07	3.51515e-05
Cs8g13710	-1.81143	4.66001	9.01346e-07	3.62164e-05
Cs9g06160	-7.12155	-0.631342	9.14536e-07	3.66745e-05
Cs8g12640	1.128	9.35139	9.4388e-07	3.77773e-05
Cs7g26690	-5.21226	-0.632245	9.46817e-07	3.7821e-05
Cs3g24480	-1.87033	1.89535	9.6754e-07	3.85736e-05
Cs1g06290	-1.13169	6.1894	9.77915e-07	3.89115e-05
orange1.1t00831	-3.08017	-0.124177	9.79824e-07	3.89119e-05
Cs7g13190	-3.98133	0.262569	9.86194e-07	3.90891e-05
Cs7g31430	-1.57612	3.38714	9.99326e-07	3.95332e-05
orange1.1t01969	1.12977	8.4641	1.01637e-06	4.013e-05
Cs4g12310	-1.68809	2.91362	1.02759e-06	4.0495e-05
Cs6g11080	-1.02677	5.50397	1.10062e-06	4.32897e-05
Cs3g01480	-1.92157	3.69994	1.11024e-06	4.35843e-05
orange1.1t01911	-1.09209	6.20686	1.12565e-06	4.41048e-05
Cs9g01410	1.17081	9.29699	1.13717e-06	4.44711e-05
Cs7g10990	-1.78912	2.9064	1.17257e-06	4.57122e-05
Cs5g21200	3.03044	0.427822	1.17337e-06	4.57122e-05
Cs9g18780	-1.79888	2.06109	1.17758e-06	4.57893e-05
Cs8g04660	-3.75088	0.575995	1.19126e-06	4.62335e-05
Cs3g25380	1.19387	5.36846	1.19607e-06	4.63323e-05
orange1.1t03683	1.03028	7.71297	1.20379e-06	4.65435e-05
Cs1g12430	1.679	4.95039	1.24772e-06	4.8151e-05
Cs1g19910	-1.24533	6.0371	1.26626e-06	4.87438e-05
Cs2g20020	-1.4864	3.67858	1.26783e-06	4.87438e-05
Cs2g23260	-2.90906	1.03197	1.29015e-06	4.94845e-05
Cs9g16600	-1.25377	4.56078	1.29376e-06	4.94845e-05
Cs6g11690	-2.88306	5.10884	1.29434e-06	4.94845e-05
Cs7g12810	-1.3917	3.1957	1.30266e-06	4.97097e-05
Cs1g09580	-2.3072	1.31586	1.33467e-06	5.08366e-05
Cs7g09390	-1.56796	5.10711	1.33919e-06	5.09141e-05
orange1.1t04304	1.15904	4.55301	1.3832e-06	5.24899e-05
Cs6g09420	-1.58329	2.86763	1.44794e-06	5.48452e-05
Cs4g03970	-1.59173	3.12373	1.45618e-06	5.50555e-05
Cs1g21880	-1.20444	5.05684	1.46251e-06	5.51928e-05
Cs2g04760	-1.09719	4.56504	1.46663e-06	5.52466e-05
Cs6g10310	-1.03529	4.9981	1.48779e-06	5.5941e-05
Cs3g15780	1.12099	5.66291	1.51421e-06	5.68185e-05
orange1.1t01767	-2.19262	1.04007	1.51667e-06	5.68185e-05
Cs7g06140	-1.43971	3.31483	1.52791e-06	5.7135e-05
Cs8g15240	-1.3506	5.60102	1.5331e-06	5.72247e-05
Cs1g03210	-1.6177	2.76809	1.56058e-06	5.81443e-05
Cs5g32000	-2.22764	0.899341	1.56634e-06	5.82531e-05
Cs4g06030	-2.10569	1.77202	1.60648e-06	5.96378e-05
Cs6g21550	1.31423	3.58621	1.61012e-06	5.96648e-05
Cs1g25290	-4.13186	-0.0936536	1.62623e-06	6.01528e-05
Cs9g10540	-1.11745	7.25652	1.62971e-06	6.01732e-05
Cs2g13450	-2.2037	1.82665	1.65407e-06	6.09625e-05
Cs3g08350	-3.89116	0.545972	1.69066e-06	6.21993e-05
Cs3g24440	-1.9156	2.68217	1.69844e-06	6.23735e-05
orange1.1t02202	-1.73662	2.25892	1.71733e-06	6.29545e-05
Cs8g06570	-4.19044	0.80916	1.80658e-06	6.61079e-05
orange1.1t01339	-1.47404	6.38985	1.85608e-06	6.76776e-05
orange1.1t01772	-1.09068	4.62334	1.87345e-06	6.79917e-05
Cs3g25800	-1.12844	5.136	1.87367e-06	6.79917e-05
Cs5g34820	-1.03087	5.05834	1.87763e-06	6.79917e-05
Cs1g12580	-1.14627	4.50417	1.87797e-06	6.79917e-05
Cs5g30185	3.30075	-0.306585	1.88317e-06	6.806e-05
Cs7g15030	-1.20474	5.8157	1.89455e-06	6.81482e-05
orange1.1t05692	1.24296	4.0773	1.90169e-06	6.81482e-05
Cs8g08300	-1.81281	4.00887	1.90224e-06	6.81482e-05
orange1.1t03827	-1.72413	2.50436	1.91123e-06	6.83507e-05
Cs9g12370	-1.36648	5.06136	1.93157e-06	6.89576e-05
Cs2g17870	-1.37891	3.5925	1.95222e-06	6.95736e-05
Cs3g17310	-1.45161	3.1371	1.97532e-06	7.02628e-05
Cs4g17620	1.16728	4.64053	2.04619e-06	7.25443e-05
Cs8g19010	-1.65097	2.80196	2.06164e-06	7.29656e-05
Cs2g12590	1.59555	5.74972	2.07662e-06	7.33692e-05
Cs5g08930	1.10906	4.69575	2.10278e-06	7.41656e-05
Cs8g08310	-2.02205	5.55231	2.14308e-06	7.54572e-05
Cs3g25370	1.04014	8.29352	2.16888e-06	7.61756e-05
Cs3g27360	1.2797	5.00311	2.17092e-06	7.61756e-05
Cs9g17960	1.30012	7.1871	2.21998e-06	7.77636e-05
Cs1g26190	-1.64015	8.25647	2.22845e-06	7.79274e-05
Cs9g01760	1.31887	7.30947	2.23549e-06	7.80404e-05
Cs2g21170	1.09909	5.14855	2.26169e-06	7.88206e-05
Cs3g25990	-1.18297	4.45564	2.2792e-06	7.9296e-05
Cs6g16350	-1.137	4.96634	2.29021e-06	7.95441e-05
Cs4g03960	-1.91062	2.63598	2.36378e-06	8.19604e-05
Cs7g06080	-3.07676	4.42586	2.4122e-06	8.33572e-05
Cs6g21460	1.12791	8.59204	2.46206e-06	8.49369e-05
Cs7g29660	1.54155	4.45262	2.48333e-06	8.55269e-05
Cs3g14615	1.24787	3.75462	2.52929e-06	8.69635e-05
Cs3g11210	-1.5831	2.80181	2.55019e-06	8.75352e-05
Cs2g05960	-2.60471	4.29764	2.55584e-06	8.75824e-05
Cs5g34690	-2.35361	1.63789	2.62326e-06	8.97427e-05
Cs4g06950	2.02043	1.80292	2.71407e-06	9.26944e-05
Cs1g21970	-1.22552	5.14816	2.75671e-06	9.39943e-05
Cs6g16780	-1.90616	2.51388	2.87209e-06	9.76302e-05
orange1.1t03313	-2.70829	0.527678	2.87288e-06	9.76302e-05
Cs3g18240	-1.15164	5.80523	2.93673e-06	9.9635e-05
Cs3g15670	2.22037	1.60186	2.97265e-06	0.000100687
orange1.1t03576	1.35814	3.77758	3.00599e-06	0.000101648
orange1.1t02551	1.19975	7.69159	3.02287e-06	0.00010205
orange1.1t00156	-1.63682	2.52459	3.1523e-06	0.000106245
orange1.1t02755	-3.2553	3.76882	3.1768e-06	0.000106773
Cs2g04490	1.62874	5.68202	3.17839e-06	0.000106773
orange1.1t03044	-1.04265	6.07694	3.25406e-06	0.000108991
Cs2g23820	1.35827	4.99844	3.25504e-06	0.000108991
Cs9g02870	-1.09611	4.63059	3.36756e-06	0.000112574
Cs1g20260	1.3273	5.13027	3.38767e-06	0.000113062
Cs1g12810	1.02032	5.14186	3.45317e-06	0.000115061
Cs6g17090	-1.16567	6.98559	3.47471e-06	0.00011547
Cs8g05940	-2.36892	2.37935	3.47709e-06	0.00011547
orange1.1t01909	-1.46802	4.97521	3.48236e-06	0.00011547
Cs8g09070	-1.917	3.9793	3.65687e-06	0.000120865
Cs3g15200	-1.36643	3.07001	3.67507e-06	0.000121271
Cs1g25280	-1.53831	5.78243	3.70364e-06	0.000122018
Cs8g14120	2.12532	7.4197	3.75794e-06	0.000123608
Cs2g06640	2.13587	2.9406	3.84879e-06	0.000126393
Cs6g12880	1.26967	9.76937	3.87202e-06	0.000126832
Cs8g03300	-1.15953	5.04029	3.87453e-06	0.000126832
Cs2g06200	1.16519	7.08899	3.89732e-06	0.000127374
orange1.1t02397	6.2471	-1.30706	3.90428e-06	0.000127399
Cs1g20510	2.80586	0.807491	3.9213e-06	0.000127751
orange1.1t04766	-5.97988	0.011584	3.93114e-06	0.000127868
Cs4g01125	-4.01309	0.0678813	3.98863e-06	0.000129532
orange1.1t03845	-2.30512	0.959707	4.02878e-06	0.000130507
Cs8g17390	-1.6181	6.19794	4.03137e-06	0.000130507
Cs4g10250	1.6737	3.00179	4.06248e-06	0.000131307
Cs3g24750	-1.07525	5.12579	4.12444e-06	0.000133099
Cs3g18110	-2.62736	1.07555	4.14495e-06	0.000133551
Cs5g19190	-1.25417	4.15116	4.20201e-06	0.000135065
Cs9g17750	-1.51073	4.95221	4.21172e-06	0.000135065
Cs7g18780	-1.14647	4.60302	4.26682e-06	0.000136618
Cs2g09520	-1.94777	2.09487	4.27701e-06	0.000136731
Cs1g11850	-4.20434	-0.0332707	4.29932e-06	0.00013723
Cs4g06380	-1.32242	3.8042	4.33541e-06	0.000138167
orange1.1t05522	1.44814	4.1219	4.34718e-06	0.000138327
Cs1g02740	1.27991	5.5759	4.37523e-06	0.000138822
orange1.1t06036	-2.22623	0.707531	4.3763e-06	0.000138822
Cs7g07640	1.51326	8.04952	4.43528e-06	0.000140476
Cs3g04540	4.03185	1.29085	4.54058e-06	0.000143589
Cs8g08880	1.02483	5.09416	4.55527e-06	0.000143831
Cs7g04490	-1.0366	7.14408	4.73305e-06	0.000148986
Cs7g17630	2.26719	1.19904	4.88307e-06	0.000153472
Cs2g26640	-3.45174	0.0117165	5.13924e-06	0.000160784
Cs6g13860	-2.28507	1.93726	5.21299e-06	0.00016263
Cs3g17900	-1.18316	4.16666	5.21413e-06	0.00016263
Cs9g12160	-3.07864	0.14933	5.25625e-06	0.000163446
Cs3g02080	-1.06014	4.8726	5.37305e-06	0.000166825
Cs1g08110	-1.52581	2.91856	5.40693e-06	0.000167623
Cs9g07560	-1.02559	4.63795	5.46472e-06	0.000169159
orange1.1t03183	-1.84462	2.01492	5.52249e-06	0.000170689
Cs8g14900	1.09335	5.64935	5.58404e-06	0.000172332
Cs7g08550	-1.20227	4.28256	5.61104e-06	0.000172904
Cs2g16620	-1.2389	5.32064	5.75392e-06	0.000176776
Cs3g17050	-1.08945	5.10942	5.86326e-06	0.000179865
Cs5g18620	-1.89454	1.58654	5.90438e-06	0.000180608
Cs4g17420	1.46349	5.25204	5.90511e-06	0.000180608
Cs4g18740	1.21859	8.06437	6.05967e-06	0.000184509
Cs2g16450	-1.04546	4.8259	6.22567e-06	0.000189002
Cs9g06660	-1.57482	2.6459	6.33745e-06	0.000191544
Cs3g15390	-1.08657	7.38773	6.36322e-06	0.00019204
Cs7g28340	-1.15638	5.32577	6.3833e-06	0.000192363
Cs6g04230	-1.4476	4.3335	6.51018e-06	0.000195898
Cs9g17740	1.17042	4.40057	6.58103e-06	0.00019774
Cs5g12880	2.14843	1.748	6.67029e-06	0.000199624
Cs2g30390	1.23333	9.10339	6.67666e-06	0.000199624
orange1.1t05897	3.18389	2.17383	6.68271e-06	0.000199624
Cs2g01990	-7.02791	2.20454	6.70388e-06	0.000199829
Cs7g04900	-2.19356	2.32147	6.70908e-06	0.000199829
Cs6g18850	-1.42328	2.83707	6.90754e-06	0.000205257
Cs2g30190	-2.40371	1.76261	6.91133e-06	0.000205257
Cs6g07320	1.33873	6.01955	7.15475e-06	0.000212178
Cs5g18660	-1.8692	3.82725	7.21548e-06	0.00021367
Cs1g18400	-1.31081	4.51833	7.29897e-06	0.000215707
Cs2g19430	-1.72532	2.43647	7.30532e-06	0.000215707
Cs7g09900	-1.85001	1.84322	7.33341e-06	0.000216225
Cs9g07440	-2.21697	1.13625	7.37387e-06	0.000217105
Cs6g13560	-1.14698	4.54371	7.48466e-06	0.000220051
Cs8g04130	-1.37553	3.49512	7.86193e-06	0.000230812
Cs8g18360	1.30251	7.99923	7.92599e-06	0.00023236
Cs5g09840	-1.28891	4.67526	8.16026e-06	0.000238886
Cs9g08340	2.51504	0.638583	8.18244e-06	0.000239193
Cs7g30250	1.25212	6.22417	8.26467e-06	0.000240568
Cs7g30360	-1.35888	2.9068	8.28426e-06	0.000240796
orange1.1t02570	-1.15485	5.41085	8.45478e-06	0.000245386
Cs2g13040	-3.45344	-0.384177	8.50761e-06	0.000245893
orange1.1t04609	2.46173	0.3944	8.57788e-06	0.000247574
Cs3g19080	-1.27338	3.19118	8.64622e-06	0.000249196
Cs5g02200	-1.61096	2.83057	8.77631e-06	0.00025259
Cs7g05890	-1.05315	6.14097	9.07863e-06	0.000260925
orange1.1t02791	-2.00249	1.3895	9.10736e-06	0.000261384
Cs9g17270	1.32455	6.36356	9.23804e-06	0.000264703
Cs6g10120	-3.04007	2.86001	9.24883e-06	0.000264703
Cs3g10930	-1.21646	4.82901	9.27487e-06	0.000265078
Cs9g03190	-1.53589	3.32985	9.32285e-06	0.000266078
Cs9g16440	-1.71433	4.30706	9.34698e-06	0.000266395
Cs5g09460	-1.83701	2.25261	9.45637e-06	0.000269139
Cs7g02360	1.40396	3.68362	9.48443e-06	0.000269563
Cs6g11990	1.06713	8.48741	9.75152e-06	0.000276387
orange1.1t02980	2.28708	1.60049	1.00345e-05	0.000283623
Cs1g10540	-1.10288	6.39143	1.01158e-05	0.000285528
Cs4g03550	-1.12473	5.05481	1.03737e-05	0.000292003
Cs3g27620	-1.25908	3.67232	1.08085e-05	0.000302993
Cs9g09120	-3.41015	-0.206057	1.11178e-05	0.000311238
Cs7g32390	-1.04478	4.47031	1.13969e-05	0.000318617
Cs7g10720	-1.73216	5.10904	1.15185e-05	0.000321577
Cs3g08680	-2.21395	1.83514	1.18256e-05	0.000329701
Cs8g10860	-1.04284	5.38815	1.1914e-05	0.000331713
Cs5g28650	1.80385	1.7769	1.19963e-05	0.000333493
orange1.1t02189	-4.59127	-1.10773	1.21531e-05	0.000336541
Cs8g19570	-1.13254	5.25011	1.22718e-05	0.000338913
Cs5g22710	-1.15495	4.06555	1.23745e-05	0.00034129
Cs1g14450	-3.70571	-0.748762	1.24507e-05	0.00034254
Cs3g18700	-1.29671	3.8987	1.24533e-05	0.00034254
orange1.1t01955	-3.21534	-0.0170373	1.26559e-05	0.000346717
orange1.1t03594	-2.03238	1.5468	1.2737e-05	0.000348473
orange1.1t02191	-1.84993	1.78528	1.28525e-05	0.000351166
Cs5g33720	-1.14629	4.67811	1.30628e-05	0.000356436
Cs3g11320	-1.26718	3.49158	1.34275e-05	0.00036493
Cs3g26420	1.11364	5.81812	1.35143e-05	0.0003668
Cs2g01460	-2.20375	0.967104	1.35449e-05	0.000367146
Cs7g29420	-1.36763	3.02068	1.38825e-05	0.000375303
Cs2g21235	1.64859	4.2072	1.4138e-05	0.000379954
Cs4g09360	-1.5479	2.70761	1.41827e-05	0.000379954
Cs5g09980	-1.80144	2.32129	1.41917e-05	0.000379954
Cs3g26220	-2.08832	5.13082	1.42237e-05	0.000379954
orange1.1t03589	-1.32942	5.53351	1.42267e-05	0.000379954
Cs8g15250	-1.85908	2.1218	1.42399e-05	0.000379954
Cs2g11250	1.01714	5.51001	1.42939e-05	0.000380898
Cs2g16120	-2.72196	2.80891	1.43551e-05	0.000382033
Cs7g28380	1.06028	6.65076	1.47856e-05	0.00039184
Cs3g01630	1.00832	7.67843	1.4831e-05	0.000392151
Cs4g10750	-1.46277	2.68941	1.50554e-05	0.000397059
Cs7g01880	-2.67875	0.162303	1.50976e-05	0.00039766
Cs7g05970	-1.47607	2.78969	1.51519e-05	0.000398578
Cs2g05360	4.52175	-1.16949	1.5222e-05	0.00039991
Cs5g10190	-1.42555	2.98204	1.57777e-05	0.000413341
Cs7g12650	-2.03834	2.00683	1.57938e-05	0.000413341
Cs3g19690	-1.17544	4.00681	1.59002e-05	0.000415596
Cs7g30000	1.04361	4.24728	1.62023e-05	0.000422682
Cs9g09800	-1.71904	2.55423	1.62126e-05	0.000422682
Cs6g17670	6.19451	-1.34385	1.64616e-05	0.000427544
Cs1g24950	-1.54039	5.56804	1.65781e-05	0.000429706
Cs6g15270	2.32826	0.772964	1.65868e-05	0.000429706
Cs3g13720	3.01139	1.04469	1.67038e-05	0.000431644
Cs1g26610	1.32665	8.29185	1.70141e-05	0.000439109
Cs2g06470	-4.44994	3.97472	1.7075e-05	0.000440126
Cs8g17960	-2.0663	3.59345	1.72076e-05	0.000442456
Cs6g09030	1.0367	4.51727	1.73364e-05	0.000445184
Cs9g04250	-1.28225	3.4615	1.73876e-05	0.00044594
Cs2g18270	1.47136	3.09652	1.7764e-05	0.000454458
orange1.1t02504	-2.18668	1.9034	1.78645e-05	0.000456457
Cs8g16360	-1.06129	7.39899	1.7906e-05	0.000456823
Cs1g21610	1.87495	2.36447	1.79234e-05	0.000456823
Cs3g21030	-3.96551	-0.958827	1.80133e-05	0.000458544
Cs9g04400	-1.00458	5.15108	1.8082e-05	0.000459722
Cs6g15240	-1.1654	3.51136	1.82485e-05	0.000463381
Cs1g06750	-1.08818	7.58656	1.84475e-05	0.000467825
orange1.1t02775	1.77139	4.96714	1.84692e-05	0.000467825
Cs2g03990	-1.2621	3.19411	1.88939e-05	0.000477994
Cs3g19260	-1.39598	2.58948	1.8999e-05	0.000480058
Cs7g14420	-1.72715	2.34156	1.90591e-05	0.000480983
orange1.1t03953	-1.12481	5.95195	1.95703e-05	0.000493277
Cs2g24960	-1.25734	3.57494	1.98441e-05	0.000498952
Cs2g03280	3.74785	-0.419506	1.99513e-05	0.000501032
Cs2g10090	-1.25635	3.9774	2.01369e-05	0.000504806
Cs1g17320	1.08317	6.38951	2.01719e-05	0.000504806
Cs9g04190	-1.33973	4.40454	2.01755e-05	0.000504806
Cs2g01910	-1.20629	6.69414	2.03132e-05	0.000507633
Cs3g26160	-1.68066	2.1357	2.06727e-05	0.000514733
Cs5g22720	-1.86604	1.10907	2.0942e-05	0.000520273
Cs9g09100	-1.63775	2.336	2.1051e-05	0.000522249
Cs3g03110	1.0035	6.09657	2.12081e-05	0.000525448
Cs8g06090	-2.57698	2.63473	2.12313e-05	0.000525448
Cs7g19420	-1.46926	6.33395	2.1533e-05	0.000532274
orange1.1t00405	-1.147	5.17534	2.16661e-05	0.000534918
Cs1g17570	1.0937	3.87677	2.16936e-05	0.000534953
Cs3g11770	-1.8933	1.2507	2.1761e-05	0.00053597
Cs6g01720	2.17902	0.848138	2.18158e-05	0.000536673
Cs5g33540	-1.6609	3.84176	2.20385e-05	0.000541501
Cs5g34450	-1.36405	3.10538	2.22391e-05	0.000545124
orange1.1t02745	1.01803	4.80046	2.23377e-05	0.000546233
Cs3g04140	2.46168	0.879765	2.24602e-05	0.000547921
Cs2g24530	-2.89453	0.333164	2.24934e-05	0.000548079
orange1.1t05015	6.29677	-1.27148	2.30426e-05	0.000560796
Cs5g21900	-2.12134	3.14804	2.3261e-05	0.000565439
Cs4g13690	-2.10695	1.90191	2.36286e-05	0.000573692
Cs3g07240	-1.86013	1.53738	2.37992e-05	0.000576318
orange1.1t04360	-1.87425	2.18073	2.38178e-05	0.000576318
orange1.1t04177	-2.12577	1.64394	2.38433e-05	0.000576318
Cs4g07940	1.8293	4.01996	2.38667e-05	0.000576318
Cs3g19360	-1.26267	8.16962	2.39942e-05	0.000578457
Cs9g16270	-1.10134	6.25685	2.40872e-05	0.000580017
Cs7g22980	-1.82227	1.57674	2.42476e-05	0.000583196
Cs9g17670	2.72697	0.926849	2.4342e-05	0.000584316
orange1.1t02174	1.54711	2.13353	2.44507e-05	0.000585332
Cs8g03370	-1.3474	4.71061	2.4515e-05	0.000586185
orange1.1t00384	1.85722	1.05813	2.47992e-05	0.000592291
Cs3g21470	-1.02174	4.18981	2.48378e-05	0.000592521
Cs7g15320	-1.98419	4.777	2.51035e-05	0.000597238
Cs3g12630	-2.37419	0.71626	2.51229e-05	0.000597238
Cs5g31060	-1.04887	7.05576	2.59188e-05	0.000615443
Cs7g11770	-2.92094	0.250605	2.61653e-05	0.000620577
Cs4g02520	1.50276	8.83745	2.64503e-05	0.000625888
Cs5g03710	-1.06544	4.11797	2.66481e-05	0.000629841
Cs9g12880	-6.07407	-1.42183	2.68239e-05	0.000633265
Cs7g26720	1.09745	3.78968	2.69991e-05	0.000636226
Cs2g08750	-2.48544	0.689494	2.7032e-05	0.000636226
Cs7g27910	1.08158	3.85245	2.70424e-05	0.000636226
Cs2g28260	-1.26305	2.87391	2.73888e-05	0.000642164
Cs8g03750	-1.94728	1.99042	2.77548e-05	0.00064852
Cs9g15130	-3.30016	-0.502516	2.8032e-05	0.000654249
Cs4g15210	2.30746	0.204737	2.85678e-05	0.00066524
Cs9g14150	1.68722	6.11537	2.88732e-05	0.000671588
Cs8g02290	-1.07532	3.88445	2.93419e-05	0.000681717
orange1.1t00454	-1.03374	4.77274	3.05669e-05	0.000707771
Cs7g16260	1.03379	5.06887	3.10673e-05	0.000718546
Cs8g12370	1.58988	3.59885	3.13442e-05	0.000724131
Cs3g23490	-1.00313	4.44856	3.15796e-05	0.00072858
Cs6g08175	1.31649	2.76453	3.17305e-05	0.000729766
Cs8g02380	-1.46473	2.81317	3.28543e-05	0.000753075
Cs4g09050	1.81465	1.44373	3.32045e-05	0.000760253
orange1.1t00542	-3.33948	0.698435	3.36853e-05	0.000768686
Cs3g11440	-1.26707	3.91139	3.39405e-05	0.00077193
Cs8g06470	-1.04259	5.44445	3.4002e-05	0.000772472
Cs9g12530	4.69397	-1.04426	3.42105e-05	0.000775488
Cs9g04200	-1.45779	3.59088	3.45653e-05	0.000780525
Cs8g04610	1.10732	4.51963	3.45767e-05	0.000780525
Cs5g07856	-4.7475	-0.347572	3.46191e-05	0.000780525
Cs7g30580	-1.14584	4.37197	3.46231e-05	0.000780525
orange1.1t03484	2.76142	0.394335	3.57415e-05	0.000804852
Cs6g10950	-1.00063	4.58505	3.61639e-05	0.000812577
Cs3g13670	3.22198	-0.185576	3.63486e-05	0.00081494
Cs3g12460	-3.96512	-0.958941	3.65805e-05	0.000819242
Cs3g06180	-1.64179	2.47549	3.71708e-05	0.000831554
orange1.1t00266	-1.02424	4.49247	3.755e-05	0.000839123
orange1.1t01118	-2.09442	1.34421	3.84119e-05	0.000857448
Cs3g18710	2.59671	3.09771	3.86664e-05	0.000862189
Cs1g18530	2.02177	0.729296	3.93177e-05	0.00087576
Cs9g07420	-1.54433	4.8419	3.96158e-05	0.00088144
Cs1g20150	1.36898	6.82292	3.96978e-05	0.000881444
Cs7g07050	-1.0704	6.75572	3.9702e-05	0.000881444
Cs5g27450	-1.13981	3.65137	4.01407e-05	0.000889258
Cs1g26350	1.16414	5.82334	4.04106e-05	0.00089427
Cs8g03940	-1.60595	3.06449	4.09144e-05	0.000904442
Cs5g12710	1.87613	3.15705	4.13788e-05	0.000913722
Cs1g02370	1.59092	3.50272	4.19646e-05	0.000925661
Cs3g19760	1.83345	7.95349	4.20458e-05	0.000926455
Cs1g24445	4.37679	-1.27145	4.28522e-05	0.000943209
Cs7g09080	-1.39638	3.22871	4.29564e-05	0.000944488
Cs5g11280	-1.19946	4.21187	4.3034e-05	0.00094518
Cs8g16540	-1.03731	7.07691	4.31315e-05	0.000946307
Cs2g27680	-1.09288	4.4303	4.37976e-05	0.000957844
Cs1g22010	-1.63578	1.43944	4.40588e-05	0.000962319
Cs5g28620	-2.02271	0.743058	4.40961e-05	0.000962319
Cs8g03200	-2.42615	1.72588	4.49303e-05	0.000979481
Cs7g03590	1.02341	3.7948	4.58667e-05	0.000997771
Cs4g09670	-1.25009	5.59249	4.60017e-05	0.000999648
Cs2g17670	2.31177	0.349212	4.64026e-05	0.00100622
orange1.1t01115	-2.20214	0.689657	4.79118e-05	0.00103756
Cs7g26940	1.05905	5.66857	4.79491e-05	0.00103756
Cs3g04610	-1.52746	1.73014	4.83345e-05	0.0010448
Cs5g02650	-1.6634	1.48128	4.88418e-05	0.00105465
Cs2g13530	1.02917	5.02114	4.93443e-05	0.00106421
Cs7g13600	-1.14001	4.08061	4.94401e-05	0.00106421
Cs2g17390	-1.38948	2.09578	5.06232e-05	0.00108739
Cs3g15040	-1.02773	8.34781	5.07802e-05	0.00108825
Cs1g09140	-1.21112	3.22238	5.08396e-05	0.00108825
Cs5g01480	-3.96554	-0.959098	5.08758e-05	0.00108825
Cs5g28460	-2.1568	0.92981	5.15038e-05	0.00110054
Cs2g16940	-1.31193	3.34396	5.17443e-05	0.00110453
Cs1g26050	1.00537	7.21383	5.19387e-05	0.00110752
Cs5g09470	-1.10498	5.82647	5.30567e-05	0.00113018
Cs4g15550	1.0747	4.30791	5.33683e-05	0.00113564
Cs1g26620	1.66624	2.11387	5.47111e-05	0.00116092
Cs3g10440	1.12544	4.18692	5.4726e-05	0.00116092
Cs3g27810	2.01896	6.14971	5.50892e-05	0.00116741
Cs2g31090	-2.56085	1.58963	5.51694e-05	0.0011679
orange1.1t04113	-1.46928	2.48387	5.55554e-05	0.00117486
Cs3g23080	1.62494	2.73452	5.60786e-05	0.0011847
Cs7g32280	-1.05155	4.11135	5.61966e-05	0.00118597
Cs3g27170	1.17145	3.75584	5.64006e-05	0.00118792
orange1.1t02471	-1.45444	1.89933	5.64046e-05	0.00118792
Cs4g05380	-1.17773	8.19837	5.67181e-05	0.00119329
Cs5g02310	1.56251	2.3716	5.6911e-05	0.00119505
Cs1g12480	-3.4041	0.751476	5.69183e-05	0.00119505
orange1.1t05133	-2.55491	3.22335	5.78318e-05	0.00121051
Cs9g14140	1.16592	3.23126	5.80687e-05	0.00121423
Cs9g19220	-1.02905	5.64245	5.88697e-05	0.00122972
Cs8g01860	-2.00238	1.99761	5.93019e-05	0.00123749
Cs6g07670	1.28566	6.08376	5.95442e-05	0.00124128
Cs1g25480	-1.47273	2.14278	5.99641e-05	0.00124877
Cs2g28250	-5.95595	-1.50184	6.1438e-05	0.00127816
Cs5g25820	-1.93367	0.843995	6.17944e-05	0.00128297
Cs5g09580	-1.17787	3.75008	6.22564e-05	0.00128991
Cs8g20410	-1.7428	2.67526	6.23018e-05	0.00128991
Cs5g14840	-1.01269	4.36148	6.23174e-05	0.00128991
Cs5g18050	-1.70716	4.21966	6.24667e-05	0.00129169
Cs5g13790	2.95514	-0.770858	6.27495e-05	0.00129493
Cs7g22730	1.63399	8.92959	6.28137e-05	0.00129495
Cs7g29230	2.32323	0.057863	6.38103e-05	0.00131285
Cs3g27710	-1.11597	3.76003	6.40556e-05	0.00131526
Cs2g17040	-1.62908	1.76836	6.53352e-05	0.00133972
Cs4g14150	-3.09943	-0.108296	6.58967e-05	0.00134901
Cs9g08000	1.21276	6.3579	6.62919e-05	0.00135453
Cs3g01530	1.18843	8.32181	6.63519e-05	0.00135453
Cs7g20060	-1.70929	1.47092	6.63647e-05	0.00135453
Cs3g14050	-1.86667	1.28699	6.73787e-05	0.0013733
Cs2g15360	-1.20911	6.98034	6.74779e-05	0.0013733
Cs3g09800	-1.03931	5.86601	6.80348e-05	0.0013831
Cs7g32120	-6.07576	-1.42138	6.81134e-05	0.00138333
Cs7g10020	-1.11799	4.49998	6.92116e-05	0.00140424
Cs6g03770	-1.98779	0.883184	6.97203e-05	0.00141316
Cs5g06250	-1.20943	3.68803	6.97935e-05	0.00141325
orange1.1t05466	-1.8927	1.36222	7.11258e-05	0.00143739
Cs3g23680	1.23388	5.29364	7.21728e-05	0.00145497
Cs4g03940	1.02523	4.29236	7.27726e-05	0.00146489
Cs3g27780	-1.04079	6.22712	7.33986e-05	0.00147604
Cs5g14480	-4.2816	2.8964	7.50432e-05	0.00150763
Cs6g05260	2.65589	0.685518	7.52036e-05	0.00150938
Cs7g14430	-1.25944	4.78957	7.57967e-05	0.00151979
Cs6g11935	-1.21379	3.91034	7.63843e-05	0.00153008
Cs1g17410	-1.01715	4.75511	7.68115e-05	0.00153713
Cs7g08100	2.84818	1.97755	7.73888e-05	0.00154566
Cs1g25530	1.40593	3.99619	7.82154e-05	0.00156032
orange1.1t02385	3.62535	0.712829	7.82747e-05	0.00156032
Cs3g09175	-6.01789	-1.46085	7.87425e-05	0.00156812
Cs7g17550	-1.55567	2.36779	7.89482e-05	0.00157069
orange1.1t04938	-1.63954	2.92625	8.00285e-05	0.00158756
Cs7g19720	-3.26755	0.827015	8.0597e-05	0.00159729
Cs6g03780	-3.7131	-1.13936	8.22014e-05	0.00162704
Cs2g20210	-1.76291	4.77109	8.37209e-05	0.0016544
Cs8g10910	-1.56117	1.51231	8.53789e-05	0.00168169
Cs2g21460	1.00215	8.86746	8.69369e-05	0.00170806
Cs3g21870	1.03605	4.01539	8.70499e-05	0.00170865
Cs2g19360	-1.00247	4.09669	8.73618e-05	0.00171313
Cs7g01870	-2.06514	0.367971	8.81392e-05	0.00172672
Cs1g17220	2.24161	7.86004	8.84418e-05	0.00173099
Cs8g04490	1.01939	6.26768	8.90469e-05	0.00174092
Cs5g16780	-2.13413	0.827248	8.9179e-05	0.00174092
Cs2g17570	-1.15088	4.55645	8.92039e-05	0.00174092
Cs3g20340	-1.24333	3.02077	9.04144e-05	0.00175952
Cs4g07170	-1.01278	4.26632	9.05302e-05	0.0017601
Cs9g06210	3.14381	-0.874049	9.11932e-05	0.00177131
Cs3g20890	-1.33507	3.3298	9.20276e-05	0.00178582
orange1.1t03749	-1.48505	2.95528	9.25694e-05	0.00179464
Cs2g22010	-3.32683	-0.273647	9.31761e-05	0.00180431
orange1.1t01654	1.09717	5.77661	9.32445e-05	0.00180431
Cs7g18150	-3.4196	-0.958735	9.39744e-05	0.00181672
Cs7g23810	-1.64319	3.10627	9.41147e-05	0.00181772
Cs7g31500	-4.8667	-0.903277	9.44881e-05	0.00182321
Cs2g07280	-4.26735	-0.308966	9.50688e-05	0.00183097
orange1.1t05200	-1.88216	0.844226	9.67932e-05	0.00186243
Cs5g05830	-1.01105	4.18704	9.86884e-05	0.00189356
Cs7g12250	-1.30974	3.08495	9.88727e-05	0.00189532
Cs3g18660	-2.54101	1.14874	9.92326e-05	0.00189867
Cs2g16580	-1.10406	4.39945	0.000100817	0.00192718
orange1.1t00706	-1.0354	3.65682	0.000101016	0.00192918
Cs6g03210	-3.37927	-0.987371	0.000102238	0.0019507
Cs8g04530	-1.10891	3.79195	0.000102371	0.00195144
Cs2g18060	-2.552	-0.383632	0.000102609	0.00195414
Cs8g07220	-1.09376	4.16304	0.000104336	0.00198152
Cs2g17030	1.3544	6.9945	0.000106446	0.00201838
Cs4g19680	-3.84367	-1.04653	0.000106552	0.00201838
Cs7g15990	-1.1292	3.42695	0.000106573	0.00201838
Cs1g22540	1.868	4.106	0.000107066	0.00202584
Cs6g20290	2.84003	-0.478678	0.000107955	0.00204078
Cs2g22060	5.76888	-1.62935	0.000108436	0.00204799
orange1.1t04565	2.93454	-0.584113	0.000108896	0.00205479
Cs9g10520	-1.08706	8.31902	0.000109529	0.00206293
Cs5g05360	-1.38339	2.70724	0.000109711	0.00206446
Cs5g01450	-1.16217	6.41237	0.000110094	0.00206977
orange1.1t01624	-2.23332	1.45455	0.000111518	0.00209462
Cs3g23860	5.9053	-1.54148	0.000111733	0.00209672
Cs3g06820	1.31857	3.13821	0.000112823	0.00211451
Cs4g07210	-1.87013	0.835389	0.000112976	0.00211451
Cs4g06580	-1.11082	3.44873	0.00011299	0.00211451
Cs7g22760	1.5794	3.28519	0.000113902	0.00212964
orange1.1t04827	1.48463	2.5115	0.000114188	0.00213303
orange1.1t02319	1.88658	4.56923	0.000114875	0.00214392
Cs7g17670	-1.38765	6.60877	0.000115368	0.00215116
Cs8g02230	2.1273	0.278156	0.000115529	0.00215199
Cs5g18010	-1.68672	4.98178	0.000115623	0.00215199
Cs9g08430	5.90519	-1.54151	0.000118041	0.00218706
Cs5g15130	-1.02428	6.62405	0.000118273	0.00218938
Cs5g15860	-1.91384	1.0476	0.000118425	0.00219021
Cs5g05240	-1.32723	3.22425	0.00011971	0.00221199
orange1.1t00650	-1.13071	3.03164	0.000121115	0.00223594
orange1.1t03782	-1.16261	3.37389	0.000123042	0.00226743
Cs5g18300	-2.64201	-0.608919	0.00012379	0.00227781
Cs3g18160	1.06367	7.02098	0.000124372	0.00228577
Cs6g15610	-1.03478	4.91358	0.000124915	0.00229369
Cs7g12400	-2.72319	-0.256931	0.000125313	0.00229733
Cs8g15510	1.97843	1.21101	0.000125337	0.00229733
orange1.1t02077	-2.86619	1.32249	0.000129602	0.00236702
Cs1g20080	-3.08399	-0.903394	0.000131156	0.00239052
Cs9g06150	-2.1548	3.08448	0.000131239	0.00239052
Cs5g30790	1.29885	6.81251	0.000131633	0.00239481
Cs3g23010	-1.25358	3.89585	0.000131708	0.00239481
Cs7g29570	-1.96576	1.98686	0.000132311	0.00240366
orange1.1t01744	-3.91734	-0.587441	0.000133033	0.00241249
Cs1g18450	-2.21071	-0.188548	0.000134668	0.00243782
Cs5g09610	-3.51225	-0.124641	0.00013634	0.00246373
Cs2g17200	-1.69423	2.37785	0.000136702	0.0024681
Cs6g16990	1.83432	0.941403	0.000137704	0.00247964
Cs4g09930	-1.03494	3.7789	0.000138126	0.00248422
orange1.1t04040	-1.10814	4.73018	0.000138201	0.00248422
Cs5g19950	-2.81448	-0.327424	0.000140381	0.00252119
Cs9g15300	1.10106	3.72131	0.000141276	0.00253505
Cs4g13890	-1.1248	5.91135	0.000141745	0.00254125
Cs2g31050	2.49536	2.28416	0.000145896	0.002602
Cs3g09030	-2.0706	0.734404	0.000151121	0.00268584
Cs2g09430	-1.16267	3.37929	0.00015228	0.00270409
Cs6g04580	-1.23454	3.84498	0.000153476	0.00272297
Cs6g08610	1.86081	2.73535	0.000157628	0.00279179
Cs4g02970	-1.7545	1.99631	0.000158708	0.00280608
Cs8g15600	2.58309	0.166496	0.000159894	0.0028246
Cs6g21320	1.87282	3.10113	0.0001602	0.00282759
Cs5g04700	3.62523	-0.821612	0.000160576	0.00282802
Cs6g08600	1.38676	10.1169	0.000161665	0.0028412
Cs1g22120	-1.01035	6.78351	0.000161966	0.00284406
Cs6g16650	1.41504	7.27232	0.000165209	0.00289356
orange1.1t00260	-2.82135	-0.65409	0.000165713	0.0028999
Cs3g04020	-1.90975	0.786067	0.000166088	0.00290368
Cs5g10770	-1.1108	3.57843	0.000166212	0.00290368
Cs4g19230	-2.39971	0.989349	0.000167058	0.00291597
Cs7g29020	-1.76118	4.99819	0.000167266	0.00291711
Cs9g18480	-3.25913	-0.32748	0.000167794	0.00292081
orange1.1t01415	-2.17765	0.263151	0.000167969	0.00292081
orange1.1t01548	-1.86154	1.22629	0.000168012	0.00292081
Cs5g25920	1.52779	3.62352	0.000168048	0.00292081
Cs2g10580	1.04561	8.17224	0.000169393	0.0029417
Cs3g27870	-1.24903	3.02386	0.000171291	0.00296963
Cs8g03410	-1.48356	2.83487	0.000172002	0.00297944
Cs1g15440	-2.71094	0.929631	0.000172427	0.00298427
Cs3g01900	1.13077	3.8353	0.00017297	0.00299114
Cs1g15990	-2.21372	0.699006	0.000173305	0.00299441
orange1.1t05294	-1.42254	2.58145	0.000173928	0.00300263
Cs5g28730	2.12422	2.85511	0.000174568	0.00301115
orange1.1t02851	-1.28552	2.95605	0.000174734	0.00301148
Cs2g19680	-1.25645	3.17976	0.000176886	0.00304345
Cs6g11130	-2.17572	0.768409	0.00017734	0.0030487
Cs1g26340	1.74795	4.87178	0.000178582	0.00306748
Cs9g17390	2.95533	-0.770582	0.000180414	0.00309173
orange1.1t02428	-3.27286	-0.523213	0.000180447	0.00309173
Cs7g08350	-1.64661	2.05385	0.000181283	0.00310347
Cs4g07130	1.09045	10.1009	0.000182845	0.00311999
Cs1g02530	-1.27494	2.40424	0.000182857	0.00311999
orange1.1t01006	-1.01337	3.5168	0.000184223	0.00313697
orange1.1t01372	-3.09945	-0.65408	0.000184406	0.00313697
Cs1g12460	-3.0174	1.1236	0.000184465	0.00313697
Cs5g25590	-4.59392	-1.10723	0.00018477	0.00313808
Cs2g03950	-1.48878	3.0071	0.000184836	0.00313808
Cs2g26680	-3.5684	-1.23871	0.000185924	0.00315394
Cs2g21940	-1.16697	5.00843	0.000186301	0.00315771
Cs9g05150	-1.14294	3.31472	0.000187022	0.00316732
Cs7g27330	-1.65778	1.18841	0.000187317	0.00316969
Cs3g15640	-1.64561	1.06833	0.000188841	0.00318871
Cs9g11750	-1.17983	3.57016	0.000188849	0.00318871
Cs5g16860	1.54832	7.72285	0.000188907	0.00318871
Cs4g05890	-2.03042	0.915369	0.000190141	0.00320425
Cs4g04380	-1.11771	3.43248	0.000190587	0.00320784
Cs6g17110	-1.19394	3.2005	0.000193561	0.00325251
Cs5g14370	-1.06964	8.28349	0.00019364	0.00325251
Cs1g19730	-1.53658	2.39778	0.000195016	0.00327294
Cs7g04700	1.37069	4.12837	0.000195231	0.00327387
orange1.1t04627	-1.95043	0.162816	0.000195919	0.00328272
Cs4g16020	-1.33432	2.84687	0.00019788	0.00331288
Cs1g10640	-1.19346	3.89882	0.000201972	0.00337586
Cs5g17950	-5.956	-1.50182	0.000204046	0.00340497
Cs3g25430	-1.03385	3.46715	0.000209659	0.00349296
orange1.1t02418	1.16044	3.38447	0.000211489	0.00351057
Cs3g09900	-1.68744	1.92978	0.000211573	0.00351057
Cs4g18220	-1.40425	2.81644	0.000212859	0.00352282
Cs5g12890	1.77415	1.26022	0.00021295	0.00352282
orange1.1t02713	-1.45026	2.3571	0.000212999	0.00352282
Cs4g15220	1.14568	7.79578	0.000213734	0.00352866
Cs3g14420	1.06567	7.73537	0.00021377	0.00352866
Cs2g08250	-1.2262	2.63692	0.000214059	0.00352866
Cs1g03280	-1.07003	5.94018	0.000215005	0.00353602
orange1.1t01762	-1.25338	2.59163	0.000216967	0.00356542
Cs1g03020	2.3001	-0.136992	0.000217166	0.00356583
Cs3g16400	1.90957	3.03708	0.000217436	0.00356741
Cs2g17810	-2.24308	1.78637	0.00021928	0.0035948
Cs6g18370	-5.75773	-1.63102	0.000220624	0.00361393
Cs6g15420	-1.06996	4.82148	0.000222246	0.00363469
orange1.1t02746	-1.34125	2.49665	0.000222524	0.00363634
Cs4g11670	-1.5137	2.08203	0.000222818	0.00363823
orange1.1t02445	-2.62093	1.91303	0.000223544	0.00364532
Cs7g15080	-5.9549	-1.50207	0.000228946	0.00371757
orange1.1t02662	1.23701	4.18284	0.000230413	0.00373251
Cs4g06230	-1.05785	3.0495	0.000230685	0.00373397
Cs9g16830	-1.65434	1.10323	0.00023114	0.00373837
Cs4g12220	-1.53686	1.68495	0.000237235	0.00382487
orange1.1t02258	-1.15534	2.54062	0.000238929	0.00384915
orange1.1t04419	-1.7331	2.32231	0.000241437	0.00388346
Cs5g15410	-1.05677	4.1285	0.000243258	0.00390968
Cs3g07330	-1.22257	7.5851	0.000245876	0.00394557
Cs9g08050	1.03385	6.01145	0.00024791	0.00397198
Cs7g24820	-1.0907	5.02063	0.000248734	0.00397896
Cs5g05470	1.14714	6.99806	0.000249167	0.00398278
Cs9g01390	-1.021	4.34989	0.000253845	0.00405069
Cs1g24170	-1.336	2.50241	0.00025476	0.00405953
Cs2g07550	1.40677	2.0582	0.000257181	0.00408856
orange1.1t01430	-2.24122	0.310432	0.000259962	0.00412637
Cs2g18070	-3.39701	-0.67699	0.000260599	0.00412753
Cs1g16780	-1.28662	2.51295	0.00026064	0.00412753
Cs3g15650	-2.06001	0.176076	0.000262871	0.00415645
Cs3g02330	-1.61585	1.33361	0.000264196	0.00416774
Cs5g08450	-2.33625	0.238812	0.000265294	0.00418185
orange1.1t03149	-1.82292	0.945856	0.000266304	0.00419454
Cs3g10820	-1.40006	4.26578	0.000267337	0.00420435
Cs9g01620	1.37427	4.65826	0.000269438	0.00423414
Cs2g11110	1.98023	0.94134	0.000271448	0.0042592
Cs7g30170	-1.49197	6.39522	0.000272187	0.00426752
Cs8g03230	-1.58177	2.53537	0.000274037	0.00428997
Cs2g18290	1.93411	2.56238	0.000275021	0.00429553
Cs1g23710	-1.27404	4.42994	0.000275725	0.00430324
Cs1g12670	-1.47237	2.21605	0.000277873	0.00432688
Cs3g22170	2.32323	-0.0282437	0.000278392	0.00432896
orange1.1t00571	1.09675	4.89421	0.000278429	0.00432896
Cs4g08780	-1.28411	2.44726	0.000279802	0.004347
Cs4g04890	-1.08072	4.07332	0.000280825	0.0043596
Cs6g15880	1.31823	5.41074	0.000283925	0.00439772
orange1.1t01935	-1.24896	4.56774	0.000285838	0.00442402
Cs1g13520	1.22593	7.46162	0.000286371	0.00442834
Cs8g15290	-3.29494	-1.04632	0.00028655	0.00442834
Cs2g27220	-1.60915	1.85616	0.000288771	0.00445413
Cs1g22140	1.41696	6.76289	0.000289826	0.00446214
Cs6g18420	-1.42044	1.81553	0.000290129	0.00446287
Cs2g03430	1.29558	3.84283	0.000291435	0.00447634
orange1.1t02520	-6.78159	-0.903201	0.000291863	0.0044767
orange1.1t01564	-1.20872	2.50227	0.000293614	0.00450018
Cs1g24730	-1.00175	7.03017	0.000295798	0.00453026
Cs5g03980	-3.64428	-0.0170584	0.000296331	0.00453504
Cs1g08130	1.69029	4.88318	0.000296657	0.00453664
Cs3g21490	-1.1055	2.81933	0.000303694	0.00464079
orange1.1t00189	-2.52439	-0.402791	0.000304895	0.00465567
Cs1g20610	-1.01932	4.04243	0.00030801	0.00469624
Cs7g31640	-2.28267	0.0407005	0.000308443	0.00469934
Cs1g23030	-1.12386	3.20382	0.000308889	0.00470264
Cs2g26210	-1.67656	1.30453	0.000312733	0.00475502
Cs3g16570	1.05629	7.15974	0.000312794	0.00475502
Cs1g22940	-1.12424	8.95152	0.000314589	0.00477876
Cs5g03620	1.0833	3.0929	0.000316212	0.0047986
Cs4g14230	1.5261	5.57909	0.000316363	0.0047986
Cs1g05180	-3.19483	-0.824425	0.000318236	0.00482344
Cs8g17090	-2.44369	-0.461557	0.000319637	0.00483752
Cs2g22640	-2.57759	-0.654277	0.000319914	0.00483813
Cs5g18280	-1.00448	3.89744	0.000321138	0.00485307
Cs1g08150	-1.61481	2.28333	0.000322659	0.00486528
Cs6g19340	-1.98722	1.06826	0.000324272	0.00488601
Cs1g13270	-1.38865	1.45022	0.000327946	0.00493775
Cs6g16980	1.36971	7.88026	0.000333021	0.0050068
Cs7g27080	-1.80171	1.47039	0.000334625	0.00502355
orange1.1t00312	6.64418	-1.01411	0.000335939	0.00503958
Cs3g16250	-1.04523	3.6739	0.000336817	0.00504536
Cs3g27880	-1.06029	3.56756	0.000339424	0.0050807
Cs4g12460	3.27207	-1.0743	0.000342383	0.00512125
Cs5g05180	-1.36546	1.92243	0.000347746	0.00517502
Cs5g20250	1.389	2.49125	0.000357569	0.00531735
Cs3g16590	-1.07779	4.28713	0.000360628	0.00535646
Cs1g26210	-1.05805	3.42188	0.0003617	0.00536314
orange1.1t01260	1.55144	2.8085	0.000361957	0.00536314
Cs6g19190	-1.16269	3.39309	0.000366219	0.00541846
Cs7g07770	-1.31867	4.34244	0.000368268	0.00544483
Cs9g06010	2.36984	-0.289222	0.000368787	0.00544858
Cs9g12790	-4.45567	-1.20491	0.000369416	0.00545395
Cs5g10180	1.27901	7.9855	0.000375418	0.0055248
Cs7g10560	-1.60448	1.80175	0.000376162	0.00552964
orange1.1t00271	-1.86609	0.671585	0.000376533	0.00553112
Cs9g15350	-2.09845	-0.0923343	0.000387074	0.00568188
Cs4g15830	-1.13727	5.38547	0.000388546	0.00569942
Cs6g01350	5.53902	-1.77148	0.000389835	0.00571423
Cs7g14940	2.62837	2.96597	0.000392449	0.00574844
orange1.1t00200	-1.3144	2.43116	0.000393133	0.00575023
Cs2g13060	-1.37711	2.22931	0.000396953	0.00579784
orange1.1t01652	-1.24787	2.57981	0.000400361	0.00583928
Cs7g28520	-1.38576	1.80689	0.000401575	0.00585282
Cs9g06360	-1.19216	3.70535	0.000403114	0.00587108
orange1.1t01910	-1.34486	1.63485	0.000404125	0.00588162
Cs5g15090	1.77422	0.789595	0.000405294	0.0058861
Cs5g27570	1.12169	11.0559	0.000409184	0.00592999
Cs5g29680	-1.28103	2.51743	0.000414014	0.00599574
orange1.1t01707	-1.33023	7.72614	0.00041508	0.00600694
Cs6g15730	1.08384	3.2301	0.000415681	0.00601138
Cs1g20890	-1.16588	4.8381	0.000417537	0.00603398
Cs9g08110	-2.53614	-0.0472721	0.000419983	0.00606474
Cs4g14045	-2.23802	-0.0770365	0.000420258	0.00606474
Cs5g27370	-2.73712	-0.0029747	0.000420793	0.00606818
orange1.1t00612	2.34627	-0.306427	0.000426257	0.00613834
Cs3g05300	-1.42497	2.98909	0.000439304	0.00629526
orange1.1t00573	-1.43698	1.44498	0.000441305	0.00631951
Cs5g10270	-6.88448	-0.823257	0.00045078	0.00643721
Cs6g19380	1.01386	5.1765	0.000452986	0.00645973
orange1.1t05347	1.15999	5.33879	0.000454059	0.00647049
Cs7g27350	2.41879	0.360688	0.00046122	0.00656342
orange1.1t05945	1.02784	3.11835	0.000461928	0.00656893
Cs7g30840	-3.02722	-0.502884	0.000462472	0.00657211
Cs4g16160	-2.7863	-0.876451	0.000463219	0.00657816
Cs8g10570	-3.94826	-1.54349	0.000466731	0.00661886
Cs4g18000	1.03136	4.70795	0.000468758	0.006643
Cs2g10540	-1.74171	1.70291	0.000469412	0.00664768
orange1.1t02482	1.24112	3.92213	0.000474656	0.00670803
orange1.1t05192	1.02562	3.39262	0.000477223	0.00672576
Cs3g10980	-1.84057	1.02648	0.000478539	0.00673967
Cs5g08670	-1.15522	2.77957	0.00048746	0.0068418
Cs8g14700	-1.8475	1.84031	0.000489446	0.00686027
Cs9g10970	-2.32657	-0.543927	0.000490363	0.00686843
Cs4g09690	-1.10374	3.82234	0.000502723	0.00702236
Cs3g16430	1.28607	3.18828	0.00050937	0.00710552
Cs4g05910	-4.01506	-1.50148	0.000513702	0.00715202
Cs1g12520	-1.58298	2.03634	0.00051375	0.00715202
Cs7g11820	1.29409	1.91475	0.000516171	0.00717597
orange1.1t01705	-3.01533	2.35983	0.000518205	0.00719805
orange1.1t04786	-1.14648	2.67405	0.000520841	0.00721913
Cs5g01990	-1.90078	1.72172	0.000521037	0.00721913
Cs7g02920	-1.88776	0.644173	0.000521563	0.00722153
Cs1g19400	1.08447	3.63608	0.000527168	0.00728829
Cs7g08810	-1.33653	2.56444	0.000530858	0.00732171
Cs8g06060	1.10345	2.79396	0.000531105	0.00732171
Cs7g29030	-5.52927	-1.77264	0.000533821	0.00734658
Cs5g03390	-2.2251	0.487533	0.000535417	0.00735866
Cs5g16840	2.7287	-0.928517	0.000536705	0.00737142
Cs2g20610	-1.02959	3.32564	0.000540629	0.00741041
Cs5g02490	2.29078	-0.459105	0.000541181	0.00741074
Cs4g07340	2.38141	0.470292	0.00054326	0.00743157
Cs7g28690	-1.35631	1.70813	0.000546606	0.00746737
Cs8g14600	1.54696	1.66252	0.00055043	0.0075146
Cs5g06380	-1.34056	2.03658	0.000552671	0.00753015
Cs9g14360	-3.0921	3.32152	0.000555468	0.00755821
Cs6g19670	-1.23559	1.86006	0.000563004	0.00763539
Cs9g13710	1.96669	-0.0434234	0.000564649	0.00765264
Cs5g12720	1.16919	2.31985	0.000565163	0.00765454
Cs8g19400	-1.84545	3.67267	0.000566923	0.0076733
Cs7g27120	-2.65198	-0.309174	0.000569543	0.00770368
Cs3g27660	6.43551	-1.16989	0.000569994	0.00770469
Cs7g20340	-2.78796	-0.346775	0.000572305	0.00772574
Cs5g22800	-1.34668	2.35703	0.000577739	0.00779397
Cs2g10780	-2.90783	0.0116054	0.000579659	0.00781472
Cs3g18610	-1.80509	1.49674	0.000582123	0.00784278
Cs3g03135	-1.40156	3.24356	0.000585136	0.00787819
Cs3g09040	-2.3992	0.68079	0.000588447	0.00791757
Cs1g21660	-1.02081	4.14717	0.000591604	0.00795483
Cs4g04270	-1.30458	2.1093	0.000593262	0.00796666
Cs9g12220	-1.9844	2.13979	0.000595378	0.00798985
Cs2g11770	-1.15907	2.88796	0.000596821	0.00800396
orange1.1t02993	1.01755	3.27435	0.000599711	0.00802696
Cs1g23500	-1.1466	2.60638	0.000601275	0.00804264
orange1.1t01749	-1.05331	3.35456	0.000602442	0.00805299
Cs1g07280	-3.6674	-1.17159	0.000604457	0.00806621
Cs7g30960	-3.56775	-1.23894	0.000604653	0.00806621
Cs7g17600	-1.12964	5.10513	0.000605207	0.00806621
Cs5g23830	1.15676	2.59308	0.000605399	0.00806621
Cs3g05770	1.1275	3.33054	0.000607865	0.00809381
Cs9g08480	-1.16322	3.10954	0.000614836	0.008176
Cs3g15710	-1.45692	2.00105	0.000622061	0.00826671
Cs5g02480	1.19367	4.0624	0.000623149	0.00827045
Cs1g22910	1.77301	1.59135	0.000625797	0.00830021
Cs3g26830	-1.5879	0.938231	0.000627868	0.0083223
Cs5g20040	1.83606	0.405003	0.000630805	0.00835582
Cs5g24220	1.96096	1.62577	0.000632397	0.0083661
Cs2g29060	-1.04354	3.73822	0.000639485	0.00844895
Cs2g10200	-3.40789	-1.34539	0.000642408	0.00847664
Cs9g09080	-1.38423	4.26421	0.000645499	0.00850101
Cs7g01140	-1.23711	3.67313	0.000646237	0.00850526
Cs7g13230	-5.42568	-0.460637	0.000649685	0.0085342
Cs2g03840	-1.57379	4.52223	0.000655668	0.00860727
Cs5g02790	2.07579	1.86561	0.000658128	0.00863404
orange1.1t03455	-2.04237	4.71018	0.000664797	0.00871037
Cs8g13910	-2.60459	-0.481816	0.000665835	0.0087184
Cs9g15750	-3.24997	-1.07669	0.000667343	0.00873256
Cs5g11330	-5.82898	-1.58621	0.000670376	0.00876666
Cs4g05370	4.91641	1.07577	0.000673591	0.00879187
Cs5g01890	-1.3595	2.46369	0.000675767	0.00881466
Cs8g18380	-1.50598	1.02617	0.000676768	0.0088221
Cs3g18070	1.43842	5.29144	0.000677715	0.00882882
Cs7g08650	3.10721	-0.900742	0.000679147	0.00883624
orange1.1t02458	-1.9437	-0.0467283	0.000685027	0.0089011
Cs8g20100	-1.30525	1.93396	0.00068672	0.0089065
Cs1g22380	1.1714	3.68056	0.000687713	0.00891097
Cs7g07320	-1.59127	0.597415	0.000687934	0.00891097
Cs1g05250	-1.74571	0.625969	0.000688982	0.0089189
Cs6g06870	-1.83841	0.60715	0.000693938	0.00896379
Cs6g10940	-1.68611	1.72002	0.000695971	0.00897535
Cs3g05800	-1.23027	5.68585	0.000698853	0.00899896
Cs2g28760	3.7088	2.74277	0.000699558	0.00899896
Cs3g05310	2.85797	0.382402	0.000700244	0.00900214
Cs2g06240	1.1577	3.73136	0.000706392	0.00905844
Cs1g05550	1.09245	2.58102	0.000709132	0.00908789
Cs8g05060	1.05157	9.26883	0.000709823	0.00909106
Cs5g27840	3.36971	-1.38125	0.000717092	0.00917841
orange1.1t01583	-1.83689	0.368679	0.000731183	0.00933545
Cs9g13790	1.05806	6.09962	0.000732763	0.00934448
Cs8g14950	2.52518	8.90899	0.000733548	0.00934448
Cs9g15860	1.09732	3.44019	0.000733714	0.00934448
Cs9g16770	-1.83969	1.40037	0.00073596	0.00936726
orange1.1t01718	-2.11432	-0.256654	0.000739544	0.00940574
Cs3g16540	1.20464	6.28768	0.000739901	0.00940574
Cs7g06120	1.23252	3.0262	0.000741851	0.00942468
Cs1g12950	-5.44251	-1.8235	0.000747368	0.00948888
Cs2g22610	-4.78414	0.123643	0.000751439	0.00952288
Cs5g08640	1.1586	7.18314	0.000753293	0.00954046
Cs3g09090	-1.19264	4.69142	0.00076041	0.00960686
Cs2g05930	-5.52965	-1.77257	0.000777712	0.00980128
Cs1g07380	-1.69551	1.61097	0.000778692	0.0098076
orange1.1t04961	-1.90959	0.0691345	0.000798306	0.0100116
orange1.1t00472	-1.45635	3.9543	0.000802582	0.010059
Cs1g13320	1.07179	2.62683	0.000810471	0.0101393
Cs1g11880	1.30191	3.48501	0.000813674	0.0101657
Cs3g16060	-1.29338	1.92642	0.000814073	0.0101657
Cs9g14520	6.08751	-1.41927	0.000816887	0.0101947
Cs4g08370	7.10402	-0.650936	0.000820098	0.0102161
Cs5g12260	-1.09447	3.03002	0.000827222	0.0102901
Cs3g06640	-1.75777	1.14986	0.000827547	0.0102901
Cs5g09240	-1.66049	0.989606	0.000843497	0.010463
Cs3g26750	-1.01354	3.98951	0.000851605	0.0105508
Cs2g05605	1.02316	3.70053	0.000852568	0.0105564
Cs6g14840	-1.62367	1.78227	0.000858329	0.0106115
Cs6g13740	1.00686	3.02619	0.000858571	0.0106115
orange1.1t03269	-1.83096	1.01958	0.000859482	0.0106163
Cs7g08080	1.10094	3.94873	0.000860943	0.0106217
Cs5g16870	3.08128	-1.20281	0.000861495	0.010622
orange1.1t01658	1.39555	2.17237	0.00086386	0.0106447
Cs3g26760	-1.36065	1.663	0.000866248	0.010655
Cs2g05320	1.01871	4.11281	0.00086788	0.0106686
Cs7g21490	2.00762	0.126364	0.000868546	0.0106701
Cs3g07395	-1.405	1.81956	0.000869045	0.0106701
Cs6g08930	-1.34607	1.43952	0.000879324	0.0107577
Cs6g21000	-1.93637	0.213731	0.000885298	0.0108101
Cs7g10810	-1.0756	3.21626	0.000886982	0.0108191
Cs4g19900	-1.20207	2.32484	0.000888436	0.0108297
Cs5g31250	-3.88069	-1.58632	0.000888909	0.0108297
Cs3g17150	-1.74675	0.819159	0.000899803	0.010917
Cs8g07470	1.12544	5.3474	0.000907469	0.010984
Cs8g05300	-1.08242	3.24535	0.000919551	0.0111171
Cs3g10410	1.02216	8.71416	0.000920139	0.0111176
Cs6g07240	-1.6362	2.60468	0.000931527	0.0112421
Cs7g04150	1.1093	5.19948	0.000945784	0.0113738
Cs1g21270	1.9301	1.11284	0.00096435	0.0115496
Cs2g02390	-1.35052	1.51782	0.000964909	0.0115496
Cs6g17970	2.29995	-0.136369	0.000974193	0.0116539
Cs6g14430	1.31535	1.81874	0.000978092	0.0116801
Cs9g02980	-2.0039	0.263628	0.000987772	0.011782
Cs3g17970	-1.25303	2.19785	0.000994404	0.0118473
Cs9g13610	-1.04959	4.05468	0.0010019	0.0119291
Cs2g22370	-5.35177	-1.87589	0.00100684	0.0119676
Cs5g07854	-3.8588	-0.631996	0.00102802	0.0121911
Cs3g25150	-1.09931	2.77568	0.00103814	0.01229
Cs2g30480	1.44367	4.09176	0.00104235	0.0123324
Cs1g23410	-1.50961	1.61053	0.00104451	0.0123509
Cs6g20620	1.10162	3.90217	0.00104616	0.0123633
orange1.1t01241	4.56809	-1.13676	0.0010471	0.0123672
Cs2g18105	-3.00032	-0.724436	0.00105594	0.0124501
Cs3g05760	1.88661	2.42795	0.00106119	0.0125048
Cs5g27990	-2.5413	-0.849724	0.00106906	0.0125643
Cs5g05670	-3.40697	-1.34571	0.00106968	0.0125643
Cs3g08810	-1.49226	0.960513	0.00106992	0.0125643
Cs2g04800	-2.05385	0.577089	0.00107252	0.0125827
Cs2g22770	-2.3678	-0.798365	0.00107271	0.0125827
Cs8g01350	-1.54894	0.567859	0.00108705	0.0127363
Cs5g26470	-1.16915	3.04121	0.00111521	0.0129925
Cs7g30780	-1.02498	7.17435	0.00111525	0.0129925
Cs7g23170	1.22723	2.24164	0.00111677	0.0130028
Cs9g18920	-6.5095	-1.10861	0.00112107	0.0130367
Cs8g11370	-3.40758	-1.34556	0.00112159	0.0130367
Cs2g28870	-2.99526	-0.346798	0.0011244	0.013057
Cs2g07250	-3.12966	4.98937	0.00112505	0.013057
orange1.1t00577	-1.21611	2.10617	0.00112922	0.0130956
Cs7g13200	-1.3412	8.56716	0.00114018	0.0131854
Cs6g02750	5.26597	-1.92903	0.00115899	0.0133688
Cs7g09440	1.43547	5.47205	0.0011593	0.0133688
Cs4g02300	-1.10769	2.85962	0.00116849	0.0134672
orange1.1t03062	-5.44179	-1.82363	0.00118008	0.0135855
Cs6g07540	-1.10742	5.13342	0.00118681	0.0136399
Cs1g04870	1.41651	8.74672	0.00118808	0.0136399
Cs8g05040	-1.4531	1.0959	0.00120829	0.0138172
Cs5g27140	-1.04089	3.62148	0.00122145	0.0139365
Cs1g12300	-6.85209	-0.849112	0.00123505	0.0140604
Cs6g05660	-4.01991	-0.18778	0.00123868	0.0140904
Cs1g09610	-2.32732	-0.677273	0.00124018	0.0140953
Cs7g26250	-2.415	-0.481809	0.00124645	0.0141587
Cs9g02540	-1.6711	0.653736	0.00125121	0.0141892
Cs7g26640	-2.39304	0.983375	0.00125697	0.0142466
Cs9g17460	-2.7266	3.5223	0.00125938	0.0142582
Cs5g31400	3.89792	-1.58512	0.00126305	0.0142918
orange1.1t04865	1.83194	-0.136824	0.00126851	0.0143457
Cs6g21230	-1.52145	0.587357	0.00127241	0.0143818
Cs4g11530	-1.32122	1.56808	0.00127947	0.0144457
Cs8g11653	-5.25509	-1.93023	0.00128071	0.0144517
Cs7g04120	-3.01003	-1.23849	0.00128521	0.0144825
Cs2g14440	-1.66357	0.568271	0.00128783	0.0144908
orange1.1t03544	-1.28575	1.61114	0.00130224	0.0145385
Cs2g22820	-1.69638	0.819092	0.00130321	0.0145385
Cs2g31250	-1.53513	1.98716	0.00130394	0.0145385
Cs5g02450	-1.17938	2.17864	0.00130614	0.0145385
Cs3g03590	-1.33692	3.18011	0.00132066	0.0146683
Cs5g01260	1.17992	7.09872	0.0013233	0.0146738
orange1.1t02003	-1.53916	4.42732	0.00132589	0.0146945
Cs6g18510	-1.08288	3.25499	0.0013466	0.0148918
Cs3g02630	-1.12357	2.35657	0.00135374	0.0149546
Cs5g07110	-1.4922	1.12272	0.00135709	0.0149836
Cs9g19120	-3.07263	0.97434	0.00136485	0.015053
orange1.1t03618	-2.75916	1.23247	0.00137686	0.0151529
Cs6g06910	-1.05427	3.35054	0.00137961	0.0151749
Cs5g15400	-1.30998	1.35683	0.00138872	0.0152518
Cs7g26470	-4.13895	-1.42136	0.00139151	0.0152567
Cs5g26010	-1.63209	0.875529	0.0014005	0.015339
orange1.1t04980	-2.03586	0.708113	0.0014046	0.0153673
Cs1g03290	-1.1253	2.92832	0.00141509	0.0154491
orange1.1t01639	1.96725	-0.0438664	0.00141872	0.0154681
Cs2g31360	-1.55601	0.945816	0.00141908	0.0154681
Cs6g19070	-1.01233	4.41595	0.00142243	0.0154962
orange1.1t03246	-1.43329	1.40106	0.0014393	0.0156703
Cs5g27610	-1.55261	0.786551	0.00144119	0.0156703
Cs4g10140	-1.78078	5.76309	0.00144557	0.0157066
Cs4g02940	-2.29661	-0.441757	0.00145433	0.0157934
Cs5g33055	-1.19717	1.93797	0.00147087	0.0159476
Cs6g16590	-2.68669	-0.422019	0.00148623	0.0160887
orange1.1t00080	-1.19364	3.19477	0.00149204	0.0161265
Cs7g29770	-1.98694	0.625758	0.00149251	0.0161265
orange1.1t00587	-2.03048	0.456059	0.0014931	0.0161265
Cs7g18660	-2.15089	-0.139948	0.00149366	0.0161265
Cs8g04860	-1.07917	3.65047	0.00149727	0.0161485
Cs7g21340	1.79006	1.64897	0.00150924	0.0162605
Cs5g18230	1.18015	5.64409	0.00151219	0.0162837
Cs3g03640	-3.73045	-1.67655	0.00151778	0.0163267
Cs2g07080	-1.88457	0.596287	0.00152822	0.0164045
Cs7g10620	-1.5179	1.30996	0.00152966	0.0164115
Cs1g12440	1.32563	2.89144	0.00153642	0.0164667
Cs6g18930	-5.6091	-1.72396	0.00153806	0.0164756
Cs4g18090	1.15675	6.15737	0.0015416	0.0164969
Cs1g24860	1.66107	1.42255	0.00154165	0.0164969
Cs8g14980	1.05623	3.68977	0.00155822	0.0166655
Cs4g11900	2.06904	-0.49938	0.00156336	0.0166743
Cs2g13310	-1.74372	1.11041	0.00156421	0.0166743
Cs6g02000	-2.03813	-0.309561	0.0015653	0.0166743
Cs2g01360	-1.69955	3.09155	0.00156556	0.0166743
Cs2g17100	-1.51619	3.47651	0.00157683	0.0167682
Cs7g30610	-1.30648	2.17906	0.00158356	0.0168049
Cs5g05410	2.06077	2.87034	0.00158582	0.0168202
Cs8g21070	-1.69852	0.78572	0.00159352	0.0168844
orange1.1t03471	-5.25493	-1.93027	0.00159753	0.0169007
Cs5g16770	-5.25493	-1.93027	0.00159893	0.0169067
orange1.1t06011	-1.49134	0.743331	0.00160563	0.0169601
Cs3g13710	1.02261	3.92264	0.00161144	0.0170127
Cs9g05660	-1.21713	2.03743	0.00164321	0.0172592
Cs4g02140	1.53303	0.656538	0.00164786	0.0172903
Cs2g24600	1.85878	2.29751	0.00167479	0.017537
Cs1g14300	1.58509	2.56729	0.00168067	0.0175895
Cs3g14590	1.21924	3.02898	0.00171154	0.0178669
Cs9g01770	1.35381	1.0155	0.00171505	0.0178887
Cs4g01110	-4.67576	0.369317	0.00171624	0.0178887
Cs4g07040	-2.25015	2.07851	0.00172448	0.0179472
Cs5g07780	-1.30046	2.32475	0.0017366	0.018055
Cs8g19390	-1.71949	1.12313	0.00173891	0.0180698
Cs8g16690	1.41553	1.83136	0.00177271	0.0183931
Cs5g07852	-4.19582	-1.38307	0.00179168	0.0185711
Cs4g12280	-1.56468	0.794313	0.00180264	0.0186658
Cs3g23540	-1.58733	0.843735	0.00181336	0.0187201
Cs6g14100	-3.4077	-0.42134	0.00181631	0.0187252
Cs3g24190	-1.01126	3.61623	0.00182823	0.0188148
Cs3g24380	1.15778	6.16917	0.00182896	0.0188148
Cs3g27050	-3.1602	-1.13894	0.00184588	0.0189603
Cs5g28990	1.12671	8.47779	0.0018569	0.0190163
Cs9g03490	-1.44616	1.54756	0.0018787	0.0191916
orange1.1t01378	-2.1987	-0.631368	0.00188197	0.0192128
Cs5g24420	-3.46417	-1.30873	0.00188497	0.0192269
Cs2g17130	-1.28789	1.23851	0.00188923	0.0192416
Cs1g21860	-3.2874	-1.42167	0.00190256	0.0193581
Cs4g13170	-3.15916	-1.50153	0.00190696	0.0193933
orange1.1t03175	2.01499	3.17281	0.00193864	0.0196861
Cs8g08680	-2.68567	-1.17163	0.00194294	0.01972
Cs9g08910	-1.03686	2.55585	0.00195458	0.0198186
Cs5g10850	-5.25455	-1.93033	0.00197425	0.0199686
Cs6g11460	-1.07346	4.73877	0.00198548	0.0200426
orange1.1t04768	-1.14231	2.3138	0.00201014	0.0202816
Cs8g01850	-2.28516	1.33392	0.00202245	0.0203856
Cs4g02380	-5.15107	-1.98678	0.00203615	0.0205136
orange1.1t00382	-2.95534	-1.27345	0.002054	0.020663
Cs5g10480	-5.44285	-1.82342	0.00205794	0.0206823
Cs8g05480	-3.09036	-1.54331	0.00206237	0.0206938
Cs3g11290	1.43394	4.30008	0.00206413	0.0206938
orange1.1t03954	2.68845	-0.956382	0.00206665	0.0206947
Cs4g14590	1.96304	0.728582	0.00209274	0.0208886
Cs1g03700	-2.55596	-0.255893	0.0020951	0.0209021
Cs4g04740	-2.65075	-0.773507	0.00210388	0.0209692
Cs6g16020	1.7031	0.701912	0.0021124	0.0210234
Cs5g03480	-1.72291	0.802624	0.00211719	0.0210609
Cs2g26075	-1.71713	0.606502	0.00213155	0.0211557
Cs9g17780	-1.20988	1.3284	0.00213861	0.0211917
Cs4g06310	-1.37944	1.48221	0.00213983	0.0211935
Cs8g14650	-1.0936	2.08914	0.00214624	0.0212262
Cs1g05350	1.10381	2.10607	0.00214908	0.021244
Cs1g09402	1.92425	-0.399985	0.00215281	0.0212611
Cs7g10000	-1.29582	1.15636	0.00215635	0.0212749
orange1.1t02917	-2.78131	-1.38299	0.00217557	0.0214335
Cs9g14130	1.08873	3.3529	0.00219628	0.0216271
Cs2g12860	-2.06138	0.109326	0.002201	0.0216633
Cs3g16930	1.86572	-0.439061	0.0022067	0.0217049
Cs6g18060	-1.21571	3.21563	0.00220735	0.0217049
Cs3g18330	1.34423	5.30425	0.00221028	0.0217233
Cs7g04380	3.8255	-1.62961	0.00222387	0.0218463
Cs5g04980	5.26581	-1.92906	0.00222588	0.0218473
Cs3g06250	-1.14395	2.06857	0.0022309	0.0218612
Cs4g08850	-1.18211	2.9219	0.00223178	0.0218612
Cs9g12830	-1.31434	1.16915	0.00224228	0.0219326
orange1.1t03535	-2.08596	-0.586869	0.00224773	0.0219754
Cs2g03340	2.7838	-0.362387	0.00225845	0.0220592
orange1.1t03005	-1.03393	7.7588	0.00227923	0.0222303
orange1.1t00611	1.92527	2.29743	0.00228111	0.0222381
Cs1g20460	-1.85776	1.1357	0.00229062	0.0223096
Cs4g09440	1.10844	4.71058	0.00230634	0.022452
Cs4g06290	1.27021	6.22499	0.00231259	0.0224978
Cs7g28700	-1.19493	3.43208	0.00231324	0.0224978
Cs1g21010	3.58988	-1.23664	0.0023284	0.0226131
Cs4g12320	-1.48313	1.11593	0.00235213	0.0228111
Cs3g18090	-2.86038	4.64944	0.00238288	0.0230656
Cs3g16650	1.06378	2.88129	0.00238784	0.0231027
Cs5g22660	-2.20938	-0.903083	0.00242026	0.0233833
Cs4g16860	-1.1809	5.61414	0.00242847	0.0234173
Cs7g03810	-1.3605	1.24515	0.00242868	0.0234173
Cs1g23640	1.06997	6.72766	0.00244139	0.0234988
Cs6g06290	-1.00733	4.35846	0.00245179	0.0235878
Cs7g03050	1.02742	7.62458	0.00249229	0.0239326
Cs3g20970	1.06798	3.79856	0.00249567	0.0239426
Cs7g15750	-1.25915	1.73442	0.00250461	0.0240058
orange1.1t00904	-1.57831	0.2871	0.00253351	0.0242149
orange1.1t03508	2.16837	-0.796236	0.00253584	0.0242183
Cs5g21830	-1.0013	5.26147	0.00253624	0.0242183
Cs3g26470	-1.54706	1.41809	0.00255477	0.0243726
Cs3g23890	1.97697	1.11332	0.00257181	0.0245123
Cs9g02350	-1.04039	2.43154	0.00260839	0.0247918
orange1.1t01425	-2.17631	-0.309001	0.00262525	0.0249289
Cs2g27090	-1.56329	0.616448	0.00264812	0.0251344
Cs8g02890	-2.40431	-0.773517	0.00266831	0.0253144
Cs5g32150	-1.00016	3.07536	0.00269476	0.0255466
orange1.1t03339	2.29504	-0.343243	0.00271463	0.0256799
Cs2g07410	-1.3995	1.7391	0.00271531	0.0256799
Cs3g02665	-3.80802	-1.63052	0.00271561	0.0256799
orange1.1t00304	-1.15871	3.37536	0.00273831	0.0258587
Cs5g05460	-1.06643	3.41443	0.00274073	0.0258697
Cs9g06310	1.34058	1.7933	0.0027473	0.0259078
orange1.1t05763	-1.95022	0.689589	0.00275265	0.0259463
Cs9g04610	-2.6351	-1.20453	0.00276186	0.0260019
Cs7g01700	-1.09822	2.10276	0.00276921	0.0260425
Cs5g17520	-2.13382	0.914676	0.00278962	0.0261984
Cs7g30020	1.51121	0.490628	0.00281208	0.0263851
Cs1g03820	-1.8368	0.0824931	0.00282262	0.0264402
Cs2g16200	-1.05132	4.79485	0.00283469	0.0265366
orange1.1t03559	-3.64893	-1.72399	0.00286062	0.0267427
Cs5g22260	-3.46365	-1.30868	0.00288753	0.0269696
Cs2g17860	-1.15585	2.62032	0.00289255	0.0269769
orange1.1t05907	1.44275	1.26641	0.00289335	0.0269769
Cs3g23560	1.32095	4.0512	0.00290297	0.0270119
Cs3g13390	1.0145	2.33429	0.00290362	0.0270119
Cs6g06860	-2.10857	-0.823521	0.00290392	0.0270119
Cs2g10640	-1.10962	1.95292	0.00292793	0.0271859
Cs4g19060	-1.48539	3.37392	0.00294013	0.0272711
Cs7g08040	3.08746	0.140921	0.0029444	0.0272893
Cs2g20040	1.56209	0.711734	0.00295223	0.027333
orange1.1t01780	-1.557	1.03417	0.0029641	0.0273975
orange1.1t01916	-2.57728	-0.824267	0.0029682	0.0274225
Cs2g19970	1.43124	3.65113	0.00297078	0.0274225
Cs1g14280	-3.77265	-0.700506	0.00297675	0.0274575
Cs5g18330	-1.82695	0.72597	0.00299215	0.0275697
Cs7g06580	1.68197	2.15418	0.00299897	0.0276202
Cs1g04235	1.38278	0.814693	0.00300546	0.0276675
Cs1g02720	3.11129	-1.54171	0.00303925	0.0278681
orange1.1t01247	-1.37513	1.34016	0.00304659	0.0278892
Cs4g16130	-2.78768	-0.875929	0.00304825	0.0278892
orange1.1t02930	-1.71127	0.379825	0.00304847	0.0278892
Cs3g12560	-3.80846	-1.63051	0.0030486	0.0278892
Cs3g04515	-1.82524	1.19962	0.00305053	0.0278945
Cs3g17390	1.08155	5.21499	0.00306284	0.0279571
Cs3g18490	-1.16718	5.89245	0.00307665	0.0280526
Cs4g02670	1.37366	1.85942	0.00308331	0.0280937
Cs1g11840	-2.29173	-0.849978	0.00308466	0.0280937
Cs3g15320	-3.42115	-0.958267	0.00310615	0.0282518
Cs4g07080	2.18865	-0.651635	0.00311326	0.0283039
orange1.1t05207	1.13139	1.66587	0.00311791	0.0283336
Cs7g15630	-2.33291	-0.987139	0.0031412	0.0285325
Cs6g22210	-1.02241	2.13662	0.00316601	0.028707
Cs2g14250	-2.78469	-1.10738	0.00316777	0.0287103
orange1.1t01420	-2.84163	-1.34532	0.00318365	0.0288414
Cs3g25560	1.10422	2.16935	0.00318842	0.0288719
Cs8g13940	-2.89991	-1.30881	0.00319261	0.0288843
Cs5g03010	-3.33341	-0.724369	0.00322481	0.0291025
Cs7g11830	1.97765	0.290439	0.00323013	0.0291209
Cs2g19350	1.24716	1.6051	0.00323609	0.0291396
Cs2g21210	-3.42187	-0.958277	0.00323647	0.0291396
Cs7g24240	-3.56376	-1.77279	0.00323791	0.0291398
orange1.1t04504	2.8019	-1.38151	0.00325123	0.0292339
Cs6g11190	3.0381	-1.58496	0.00325944	0.0292821
Cs7g32270	-1.58985	0.743732	0.0032653	0.0293219
Cs6g18400	2.20997	-0.202128	0.00328836	0.0294902
orange1.1t03155	-1.24519	2.57766	0.00330183	0.0295524
Cs2g18210	1.09311	2.67805	0.00330251	0.0295524
Cs8g14210	-1.83362	-0.123105	0.00331888	0.0296472
orange1.1t04895	1.91694	-0.499981	0.00333746	0.0297684
Cs5g28680	-1.98452	-0.653635	0.00333827	0.0297684
Cs2g16800	-1.0584	5.93504	0.00335748	0.0299006
Cs3g10090	-2.2839	0.94513	0.00337288	0.0299857
Cs4g18120	-1.12055	8.2028	0.00338005	0.0300234
Cs8g18310	-1.42079	0.852285	0.00338938	0.0300932
Cs7g09380	-2.10575	-0.172221	0.00339524	0.0301294
Cs5g18930	-6.01428	-1.46162	0.00340613	0.0301998
Cs9g09640	-1.44712	4.55916	0.00344858	0.0304868
Cs9g09570	-1.07767	3.71391	0.00347332	0.0306313
orange1.1t00246	2.57204	1.37227	0.00351513	0.0309283
Cs5g05010	-1.01497	2.46358	0.00352029	0.0309604
Cs4g03320	-1.72845	0.654136	0.00352603	0.0309843
Cs1g03730	-1.66177	0.0829572	0.00357962	0.0314014
Cs4g10830	-1.05489	1.99772	0.0035902	0.031455
orange1.1t01383	-2.68559	-0.155972	0.00359164	0.031455
Cs8g09390	-1.28857	2.92668	0.00359323	0.031455
Cs5g20440	1.35863	1.69843	0.00359341	0.031455
Cs4g10110	-1.46446	2.87468	0.00360844	0.0315461
orange1.1t02440	-5.03899	-2.04563	0.00361341	0.0315761
Cs2g01150	-2.57983	-0.823661	0.00362761	0.0316732
Cs9g18750	4.21534	-1.38122	0.00365128	0.0318662
Cs5g02940	1.17665	6.29906	0.00367306	0.0319883
Cs4g13780	-2.15119	0.433343	0.00367673	0.0319931
orange1.1t03106	-2.18888	0.518052	0.00369584	0.032132
Cs1g03960	1.419	1.08582	0.00371085	0.0322352
Cs8g19950	-2.2695	-0.4609	0.00374183	0.0324701
Cs5g29860	1.40248	8.53108	0.00376761	0.0326176
orange1.1t02071	-1.74696	-0.256061	0.00378414	0.0327173
Cs9g09620	-1.54589	2.16976	0.00378594	0.0327173
orange1.1t03946	-5.03956	-2.04553	0.00378711	0.0327173
Cs5g09050	-1.03057	4.47866	0.0037942	0.0327647
Cs3g27500	5.26676	-1.9289	0.00383758	0.0330721
Cs7g22270	-3.21877	-0.56462	0.00383885	0.0330721
Cs4g01240	-2.19407	-0.402084	0.00384825	0.0331338
Cs9g09790	-1.42394	0.55808	0.00386089	0.0331962
Cs2g09500	1.544	0.628691	0.00386109	0.0331962
Cs7g11950	-1.4805	0.123425	0.0038622	0.0331962
Cs3g12650	-1.04168	1.87224	0.00389536	0.033441
Cs1g14183	5.0501	-2.04453	0.00390246	0.0334879
Cs1g21810	-1.14284	3.09497	0.00390566	0.0335014
Cs4g06060	2.09026	-0.847645	0.00391343	0.033554
Cs6g02190	-1.69546	0.368462	0.00392382	0.0336008
Cs3g09720	-1.0457	5.19348	0.00394311	0.0337352
orange1.1t02554	1.59631	1.02237	0.00395798	0.0338072
Cs2g22320	1.1845	1.9675	0.00395946	0.0338072
Cs4g16680	-1.12854	3.09219	0.00396918	0.033876
Cs3g09450	1.62613	-0.137241	0.00398104	0.033937
Cs1g17210	1.5778	6.93121	0.00398122	0.033937
Cs3g21010	-1.36994	0.87589	0.00398129	0.033937
Cs3g07850	-1.18251	4.31355	0.00398792	0.033969
Cs2g16240	1.97856	-0.459289	0.0040182	0.0341813
Cs3g06890	-1.00059	2.30198	0.00401995	0.0341813
Cs5g03580	-1.11332	2.04799	0.00407262	0.0345572
Cs6g05990	1.0361	3.88793	0.00407428	0.0345572
Cs2g06400	-1.34124	2.6021	0.00410951	0.0347999
orange1.1t02597	-1.18069	4.67718	0.00410969	0.0347999
Cs7g12980	-1.08726	3.28174	0.00411177	0.0348031
Cs6g03350	-1.85239	0.743469	0.00414103	0.034993
Cs3g12580	-1.02002	3.2219	0.00415924	0.0351179
Cs9g11990	-3.56525	-1.77266	0.00419465	0.0353955
orange1.1t00313	-2.42839	-0.608357	0.0042144	0.0355105
Cs8g05520	-1.38632	0.672366	0.00423273	0.0356356
Cs2g10140	-1.70723	0.0552707	0.00428775	0.03601
Cs2g11620	-2.02633	-0.876108	0.0042979	0.0360545
Cs4g17690	-1.15486	1.97189	0.00440978	0.0368237
Cs7g24940	1.28055	5.49824	0.0044656	0.0372539
Cs2g31400	5.53864	-1.77151	0.00450776	0.0375653
Cs8g18020	1.26736	3.55842	0.00451409	0.0375875
Cs1g21620	-1.81802	0.454869	0.0045228	0.0376294
Cs7g31410	-1.88942	3.63633	0.00452758	0.0376426
Cs4g04730	-1.23005	2.6324	0.00454568	0.0377585
Cs7g06960	-2.89986	-1.30902	0.0045526	0.0378006
Cs7g22860	-1.01663	1.91549	0.00456296	0.0378713
Cs4g05250	-1.68321	4.17539	0.00461041	0.0382186
Cs6g07400	1.80977	6.22218	0.0046279	0.0383326
Cs7g15050	1.44709	2.49652	0.0046369	0.0383917
Cs1g16380	1.15532	2.55338	0.00464811	0.0384689
Cs2g11220	2.67302	-1.45945	0.00465078	0.0384755
Cs1g19805	-1.2501	1.31645	0.00468683	0.0386868
Cs3g02435	-4.91762	-2.10696	0.00479189	0.0395312
Cs3g27560	2.48843	-1.30752	0.00479524	0.0395351
Cs9g17800	-1.45444	1.31058	0.00479622	0.0395351
orange1.1t00446	-1.33753	2.03436	0.00480752	0.0396123
Cs9g01250	-1.09299	4.85853	0.00485927	0.0399583
Cs9g08260	1.85467	0.204223	0.00487172	0.0400407
Cs3g03130	-1.83765	3.24708	0.00487319	0.0400407
Cs4g09830	-1.09231	1.48209	0.00492564	0.0404095
Cs1g15880	-1.29525	1.85994	0.00494179	0.0404907
Cs5g23785	-2.94135	-1.63086	0.00494928	0.0405358
Cs5g13700	-2.71819	-1.42139	0.00495258	0.0405466
Cs5g22790	-1.36173	1.03363	0.00496249	0.0405954
Cs1g24840	1.20313	3.00694	0.00498011	0.0406908
Cs7g07570	-2.6517	-1.4609	0.00499757	0.0407373
orange1.1t03201	-3.08918	-1.54348	0.00499972	0.0407373
Cs3g26020	-2.17143	0.0413405	0.00502595	0.0408698
orange1.1t00185	-1.18093	1.73876	0.00510676	0.04137
Cs3g03340	-1.05423	1.73931	0.00510766	0.04137
orange1.1t05585	-1.84395	0.568003	0.00513548	0.0415461
Cs2g29820	2.48819	-1.30732	0.00514175	0.041564
Cs9g07620	-1.02956	2.53551	0.00521008	0.04205
Cs7g02820	1.52189	7.3936	0.00524215	0.0421925
Cs2g07100	1.44976	5.84177	0.00527018	0.0423682
orange1.1t03983	-2.66591	-0.959235	0.00530179	0.0425389
Cs4g15330	-1.14336	3.25744	0.00532325	0.0426932
Cs4g08380	6.34591	-1.23648	0.00536331	0.0429652
Cs5g07160	-1.95267	2.39712	0.00536676	0.042976
orange1.1t02464	-1.16673	2.15997	0.00539799	0.0431497
orange1.1t03773	1.09393	3.80791	0.00539898	0.0431497
orange1.1t04633	-1.98647	2.13998	0.00541948	0.0432461
orange1.1t02579	-1.02487	2.04398	0.00542522	0.0432751
Cs6g13830	-1.10655	1.77369	0.0054419	0.0433575
Cs3g10050	-2.47791	-0.724472	0.00548319	0.0436356
Cs7g07240	4.92837	-2.106	0.00553837	0.0439219
Cs1g08720	-1.13126	1.66289	0.00554995	0.0439619
Cs2g08765	1.42235	0.581033	0.00556972	0.0440681
Cs5g12170	-1.33319	1.48649	0.00557532	0.0440777
Cs7g03580	-1.87239	-0.422141	0.00558098	0.0441023
Cs8g04085	-1.21159	1.31083	0.00563862	0.044441
Cs2g25500	-1.17346	1.50292	0.00565836	0.0445723
orange1.1t05187	4.10843	1.01443	0.00566226	0.0445723
Cs6g11540	2.89867	-1.04445	0.00566341	0.0445723
Cs5g23950	1.25066	1.43796	0.00566398	0.0445723
Cs5g01775	-1.54549	0.40216	0.00574064	0.0450372
Cs7g13670	2.64438	-0.985524	0.00575824	0.0451265
Cs2g28110	-1.38581	1.36897	0.0057679	0.0451474
Cs3g10085	-1.24086	0.900004	0.00579522	0.0452769
Cs7g12870	-1.5912	6.16409	0.00579991	0.0452769
Cs2g27160	-1.15496	1.88443	0.0058079	0.0453219
Cs9g18250	-1.19215	1.04124	0.0058134	0.0453476
Cs5g21220	2.60188	-0.499443	0.00581714	0.0453595
Cs5g04610	-1.09609	1.90706	0.00584077	0.0454746
Cs6g10900	1.13051	2.18497	0.00585341	0.0455528
orange1.1t05908	1.4101	0.38258	0.00586465	0.0456085
Cs9g08700	-5.35448	-1.87545	0.00589234	0.0458064
Cs3g12935	-1.27955	0.568264	0.00592479	0.0459993
Cs7g32180	-1.23063	2.20326	0.00594118	0.0460987
Cs8g10650	-1.34578	0.311213	0.0059795	0.0463434
Cs2g30620	2.23292	-0.900934	0.00599344	0.0464339
Cs2g13270	-2.58196	-1.23837	0.00601136	0.0465199
Cs7g03770	-1.52381	6.19062	0.00604005	0.0466891
Cs7g18080	1.3161	0.510884	0.00607467	0.0469036
Cs5g31970	-1.13723	1.52827	0.00613369	0.047217
Cs7g25030	1.72696	-0.137036	0.00615701	0.0473432
Cs9g14170	-2.57651	-0.823947	0.00617804	0.047487
orange1.1t04425	1.88681	-0.520377	0.006187	0.0475381
Cs3g12600	2.88135	-1.67522	0.00619365	0.0475713
Cs7g28920	-1.65804	0.434803	0.00621181	0.047675
Cs3g18600	-5.04031	-2.04542	0.00622009	0.0476798
Cs5g12070	-1.2452	1.39028	0.00622116	0.0476798
Cs5g21920	-2.58016	-1.01613	0.00625029	0.0478449
Cs1g24810	-1.63192	0.587048	0.00628191	0.0479973
Cs6g21960	1.53549	-0.0143421	0.00628592	0.0479983
Cs5g34060	1.12029	3.17637	0.00628672	0.0479983
Cs7g27590	2.96201	-1.62949	0.00629157	0.0479995
Cs4g07780	1.35811	0.348171	0.00630079	0.0480341
Cs9g11040	-1.61929	0.929879	0.00631443	0.0481024
Cs8g20170	1.03282	3.79628	0.00632055	0.0481311
Cs7g16450	-4.91679	-2.1071	0.00640859	0.0486569
Cs1g23870	-1.55546	1.14232	0.0064462	0.048888
orange1.1t01518	-3.34824	-1.38298	0.00644989	0.048898
Cs4g11330	3.7487	-1.67524	0.006454	0.048911
Cs8g05230	-2.32043	-0.107979	0.00648289	0.0490646
orange1.1t03757	-3.01655	-1.58651	0.00648384	0.0490646
Cs3g08530	-1.05032	2.47897	0.00648726	0.0490723
orange1.1t05831	-1.43036	1.02677	0.00649372	0.0490864
Cs4g06440	5.68949	-0.251539	0.00649392	0.0490864
Cs8g13510	2.31159	-0.847649	0.00650506	0.0491344
Cs1g13640	-1.1382	1.28159	0.0065331	0.049328
Cs5g10250	-4.71867	-1.01566	0.00653846	0.0493503
Cs1g05090	-1.58991	0.558054	0.0065669	0.0495467

## Sheet: 230 WTvsMT
Gene_ID	logFC	logCPM	PValue	FDR
Cs6g22240	11.2844	3.16685	8.95654e-67	1.8214e-62
Cs2g07240	4.51212	7.11148	5.59816e-40	5.69221e-36
Cs8g12630	-5.75751	2.329	1.9795e-35	1.34184e-31
Cs2g21470	-2.9733	4.63818	3.2343e-33	1.64432e-29
Cs8g20130	5.48687	2.33292	3.55997e-32	1.44791e-28
Cs6g07400	4.01973	6.76263	3.3859e-31	1.1476e-27
Cs3g14610	2.41084	5.7327	2.18797e-30	6.35637e-27
Cs3g25140	4.61353	3.40128	4.09836e-30	1.0418e-26
Cs3g06830	2.34181	8.1458	6.49951e-30	1.4686e-26
Cs2g28370	2.60617	5.94617	5.93289e-27	1.20651e-23
Cs5g10040	-1.8114	7.73935	2.06242e-25	3.81285e-22
Cs2g14940	-3.01145	3.78309	9.69924e-25	1.6437e-21
Cs1g24440	3.71238	9.09759	2.14715e-24	3.3588e-21
Cs5g16850	2.72925	6.35149	1.41178e-23	2.05071e-20
Cs1g21210	4.46722	1.79469	2.03238e-22	2.75537e-19
Cs5g25690	-3.50543	3.86925	1.59053e-21	2.02156e-18
Cs7g08730	-2.34885	4.607	4.63811e-21	5.54827e-18
orange1.1t00508	-1.99959	5.37509	1.83342e-20	2.07136e-17
orange1.1t03042	2.95313	4.56884	2.91404e-19	3.11894e-16
Cs3g26220	-2.02192	4.27708	3.26329e-19	3.31811e-16
Cs2g30480	2.43239	4.36032	4.37562e-19	4.23727e-16
Cs3g15460	-1.72425	8.28578	5.24502e-19	4.84831e-16
Cs3g23440	3.15626	6.58141	4.16722e-18	3.68454e-15
orange1.1t03773	2.25105	4.12577	1.02498e-17	8.68498e-15
Cs2g27910	2.62234	2.5068	3.98535e-17	3.24185e-14
Cs9g14480	4.91396	2.119	5.58968e-17	4.37199e-14
Cs1g12430	2.03175	4.89009	7.64071e-17	5.75487e-14
Cs5g25740	2.62093	4.75189	8.05349e-17	5.84914e-14
Cs4g18090	3.43971	6.7781	1.36711e-16	9.58671e-14
Cs8g14280	1.98481	6.74802	1.58033e-16	1.07125e-13
Cs4g12760	3.43292	5.05975	2.45113e-16	1.60794e-13
Cs2g23820	1.60615	4.95029	4.21367e-16	2.67779e-13
Cs6g16980	2.32107	7.468	5.75986e-16	3.54947e-13
Cs1g08610	3.64222	1.79517	6.48924e-16	3.71941e-13
orange1.1t03769	9.4303	1.35823	6.53992e-16	3.71941e-13
Cs5g09980	-2.72856	2.9423	6.58432e-16	3.71941e-13
Cs3g27360	1.84732	4.83518	8.83525e-16	4.82389e-13
Cs3g01120	-1.85337	4.76606	9.01395e-16	4.82389e-13
Cs5g09860	-3.33388	1.47788	1.52354e-15	7.94427e-13
Cs8g14120	2.31451	7.70769	1.93965e-15	9.86118e-13
Cs7g32220	1.93379	10.571	2.10394e-15	1.04355e-12
Cs7g14940	3.86419	2.19577	2.20456e-15	1.06743e-12
Cs1g09665	-3.47678	1.60354	3.48008e-15	1.64583e-12
Cs3g18330	2.6092	5.22221	4.42699e-15	2.02992e-12
Cs5g16860	3.45365	7.27129	4.49185e-15	2.02992e-12
Cs1g16430	1.97812	6.84962	5.66904e-15	2.50621e-12
Cs8g19720	2.37862	2.92109	6.36749e-15	2.75509e-12
Cs2g03270	3.11915	7.0369	6.88693e-15	2.91753e-12
Cs7g12440	2.27653	4.88579	7.02984e-15	2.91753e-12
Cs5g05240	-1.84133	3.96444	7.71186e-15	3.13657e-12
orange1.1t02977	4.0352	3.3764	1.09509e-14	4.3666e-12
Cs4g17630	2.17948	6.7198	1.38028e-14	5.39795e-12
Cs6g21840	2.79332	2.93381	1.7668e-14	6.77918e-12
orange1.1t01192	4.27197	3.75095	2.16957e-14	8.12469e-12
Cs6g11990	1.5119	8.30443	2.19737e-14	8.12469e-12
orange1.1t03504	-2.66105	2.72663	2.39694e-14	8.59469e-12
Cs2g28060	-1.65669	5.65812	2.40902e-14	8.59469e-12
Cs2g20140	-1.89732	4.59646	3.22087e-14	1.1293e-11
Cs6g16650	1.70153	5.97766	3.91377e-14	1.34899e-11
Cs6g18610	-2.55552	1.92535	4.43492e-14	1.50314e-11
Cs3g06820	3.27142	2.34676	7.67224e-14	2.55775e-11
Cs6g22150	-1.49179	5.48485	9.21999e-14	3.02416e-11
Cs5g16830	2.27452	3.09009	1.08653e-13	3.50724e-11
Cs3g09160	-4.79806	0.387245	1.23207e-13	3.9149e-11
Cs5g05650	1.47808	8.71722	1.27276e-13	3.98197e-11
Cs7g15610	1.49906	6.83639	1.84088e-13	5.67216e-11
Cs1g26700	1.56002	8.39486	1.88042e-13	5.70749e-11
Cs3g19650	-1.66386	4.86056	2.07207e-13	6.19671e-11
Cs9g15430	4.25543	5.9551	2.10468e-13	6.20301e-11
orange1.1t03242	2.21234	2.8298	2.85419e-13	8.29182e-11
Cs6g12060	-3.47519	1.07921	5.47706e-13	1.56875e-10
Cs7g31010	1.67689	7.83649	6.56663e-13	1.85471e-10
Cs9g18660	1.58138	8.18435	7.38992e-13	2.05865e-10
Cs5g21200	4.38343	0.510599	1.11543e-12	3.06533e-10
Cs8g05060	1.59811	7.85927	1.20409e-12	3.26484e-10
Cs2g07660	-1.73416	4.81117	1.27526e-12	3.41233e-10
orange1.1t01751	1.57078	6.21349	1.36399e-12	3.60236e-10
Cs5g27580	1.38761	6.93449	1.41543e-12	3.69027e-10
Cs8g11330	3.07254	7.18258	1.54859e-12	3.98634e-10
Cs8g19105	4.52795	0.140012	2.13454e-12	5.41917e-10
Cs9g06130	2.97894	2.00049	2.1585e-12	5.41917e-10
Cs2g29780	1.65792	3.64867	2.53419e-12	6.2848e-10
Cs8g19840	1.42351	4.86692	2.76365e-12	6.77126e-10
Cs6g11940	1.41204	8.37492	3.26549e-12	7.90559e-10
Cs4g16220	-7.44166	-0.454112	3.82323e-12	9.14696e-10
Cs1g22680	2.01451	6.18354	3.92368e-12	9.27815e-10
orange1.1t03603	2.28017	6.03817	4.74996e-12	1.11029e-09
Cs6g05260	4.05882	1.32631	5.24079e-12	1.2111e-09
Cs1g21010	5.33412	0.0497072	5.90181e-12	1.34853e-09
Cs9g02570	1.72529	4.87344	6.02105e-12	1.36049e-09
Cs5g28730	3.36658	2.34282	6.68443e-12	1.49379e-09
Cs8g10020	1.27453	9.58103	7.3114e-12	1.61614e-09
Cs2g24600	3.49959	1.91139	7.80328e-12	1.70632e-09
Cs9g15300	2.00712	3.44748	8.32902e-12	1.8019e-09
orange1.1t03602	2.19897	5.07939	8.43931e-12	1.80655e-09
Cs5g07400	1.85303	7.59749	9.60528e-12	2.03472e-09
Cs9g16640	1.63478	9.92702	9.96151e-12	2.08842e-09
orange1.1t04983	-2.00208	3.87299	1.19825e-11	2.48648e-09
Cs8g16290	2.19291	6.83771	1.37863e-11	2.8319e-09
Cs3g10430	2.20783	3.712	1.40125e-11	2.84959e-09
Cs7g02540	2.57361	4.40591	1.48677e-11	2.99356e-09
Cs7g11415	5.10556	-0.148577	1.5758e-11	3.14172e-09
Cs5g18500	-1.6368	4.97127	1.68747e-11	3.3317e-09
Cs2g18290	2.36019	1.8747	1.78188e-11	3.48427e-09
Cs4g18310	-1.34301	7.11704	1.86122e-11	3.60473e-09
Cs1g21920	-3.23085	1.08522	2.42769e-11	4.6575e-09
Cs4g14090	1.59098	6.30774	2.82762e-11	5.37406e-09
Cs1g06750	-1.4566	8.23204	3.45378e-11	6.50334e-09
Cs3g03045	-4.696	0.800543	3.67485e-11	6.85612e-09
Cs7g27010	2.06579	4.67335	3.83304e-11	7.05606e-09
Cs6g11550	7.57633	-0.343462	3.85141e-11	7.05606e-09
Cs2g02180	-1.16374	9.48674	4.06537e-11	7.38155e-09
Cs9g15800	-1.36062	5.52525	4.26425e-11	7.67414e-09
Cs7g29570	-2.94663	2.57107	4.77551e-11	8.51884e-09
Cs1g26350	1.49496	5.82136	4.90217e-11	8.66874e-09
Cs8g02840	2.18371	6.41567	5.18061e-11	9.04185e-09
Cs7g07050	-1.50692	6.08861	5.21369e-11	9.04185e-09
orange1.1t02004	1.32715	7.62921	5.24655e-11	9.04185e-09
Cs1g23450	-1.63817	4.52489	5.35837e-11	9.15696e-09
orange1.1t05522	1.74904	4.46489	5.6028e-11	9.49488e-09
Cs5g07230	1.76499	5.34293	6.09385e-11	1.02417e-08
Cs5g27140	-1.51924	4.15814	7.05891e-11	1.16716e-08
Cs9g01750	2.52635	1.64871	7.07581e-11	1.16716e-08
Cs3g19760	1.9927	8.12664	7.11683e-11	1.16716e-08
Cs3g01530	1.38547	6.39568	7.88522e-11	1.28283e-08
Cs7g22420	-2.31203	4.4058	8.00296e-11	1.29165e-08
Cs2g21000	1.33383	9.76352	8.27711e-11	1.32538e-08
Cs4g09520	1.30858	6.51924	8.38449e-11	1.33209e-08
Cs7g27290	-2.55138	1.97147	9.28229e-11	1.46329e-08
Cs2g17860	-1.80413	3.68471	1.02691e-10	1.6064e-08
Cs7g22610	-1.57918	4.60865	1.10874e-10	1.72118e-08
Cs7g01030	-1.15784	5.47042	1.16968e-10	1.80201e-08
Cs2g09840	2.31116	4.77951	1.18554e-10	1.81271e-08
Cs2g23870	2.23032	3.71932	1.20202e-10	1.8242e-08
Cs8g15510	3.34012	1.1708	1.29492e-10	1.94137e-08
Cs8g14690	-2.5974	2.56268	1.29832e-10	1.94137e-08
Cs8g06820	1.504	7.51335	1.39267e-10	2.06725e-08
Cs2g07700	2.11022	9.87647	1.41356e-10	2.08305e-08
Cs1g12670	-1.76835	2.72773	1.88304e-10	2.75492e-08
orange1.1t01790	-1.12151	6.28164	1.93217e-10	2.80662e-08
Cs6g07200	-1.17396	5.57238	2.08964e-10	3.01382e-08
Cs8g17450	1.30593	7.21747	2.44649e-10	3.50364e-08
Cs6g08500	3.40254	3.3242	2.49463e-10	3.54761e-08
orange1.1t02800	-1.63792	3.97632	2.92499e-10	4.12027e-08
Cs6g02180	-1.54031	4.6069	2.93784e-10	4.12027e-08
Cs5g28320	-1.1974	6.94365	3.40892e-10	4.74821e-08
orange1.1t04866	1.10601	6.70025	3.56908e-10	4.93747e-08
Cs1g15830	-1.31138	3.99019	3.74267e-10	5.14263e-08
orange1.1t00214	3.89785	0.976398	3.81505e-10	5.17437e-08
Cs9g17460	2.35601	2.26844	3.81666e-10	5.17437e-08
Cs3g23020	-1.21027	5.09798	3.88253e-10	5.22882e-08
Cs5g18280	-1.46123	4.07318	3.9526e-10	5.28817e-08
orange1.1t04182	1.28553	11.3716	4.29334e-10	5.7065e-08
orange1.1t02409	1.4281	8.77934	4.6417e-10	6.12946e-08
Cs2g04080	1.26474	4.6898	4.88025e-10	6.40289e-08
orange1.1t03227	1.3679	5.55878	5.21122e-10	6.79329e-08
Cs1g05070	1.29273	4.80813	5.39024e-10	6.9819e-08
Cs4g05250	-2.81063	2.41139	5.75335e-10	7.40507e-08
Cs3g23110	1.72242	9.64336	5.81531e-10	7.42053e-08
Cs3g01585	3.70084	7.78911	5.85517e-10	7.42053e-08
Cs6g16160	-2.05597	2.55352	5.87483e-10	7.42053e-08
Cs3g05310	1.8053	2.48669	6.43937e-10	8.08339e-08
orange1.1t04376	3.15656	11.1682	6.86879e-10	8.56955e-08
Cs7g31190	-1.77288	3.4439	6.92244e-10	8.58383e-08
Cs2g30460	1.27371	8.36218	7.845e-10	9.66885e-08
Cs7g06310	-1.18548	6.32864	8.57106e-10	1.05001e-07
Cs2g09450	1.48837	5.36459	8.69377e-10	1.05866e-07
orange1.1t02980	4.96705	0.804773	1.05562e-09	1.2778e-07
Cs3g02580	-3.57469	0.185906	1.121e-09	1.34891e-07
Cs5g10060	-1.03423	5.40627	1.23433e-09	1.47655e-07
Cs1g25830	-1.37319	5.00446	1.43713e-09	1.70909e-07
Cs5g30850	2.59589	9.05389	1.45378e-09	1.71884e-07
orange1.1t02754	1.06163	8.4259	1.46877e-09	1.72653e-07
Cs8g01040	-1.06245	6.39857	1.47946e-09	1.7291e-07
Cs1g20890	-1.39559	4.43859	1.52643e-09	1.7738e-07
Cs3g11790	1.59061	4.26719	1.53579e-09	1.77453e-07
Cs3g09120	-1.39636	5.09366	1.56643e-09	1.79971e-07
Cs4g07650	-1.85146	3.21566	1.62948e-09	1.86164e-07
Cs7g01700	-2.58194	1.67448	1.70848e-09	1.93139e-07
Cs4g06430	-1.23864	4.4797	1.70953e-09	1.93139e-07
Cs4g10240	1.43589	7.38673	1.92267e-09	2.16019e-07
Cs5g25680	-1.87136	3.95082	2.055e-09	2.29617e-07
Cs6g11950	3.91683	6.74512	2.12989e-09	2.36665e-07
orange1.1t02831	1.35742	4.8327	2.14134e-09	2.36665e-07
Cs5g12900	1.43271	8.4307	2.17271e-09	2.38834e-07
Cs8g05410	1.21205	7.6708	2.20816e-09	2.41285e-07
Cs2g07170	1.37232	4.32819	2.21874e-09	2.41285e-07
Cs2g29810	3.4161	0.557785	2.30527e-09	2.49362e-07
Cs5g25900	1.66287	5.16377	2.41437e-09	2.59782e-07
Cs2g20780	1.1149	9.84613	2.48164e-09	2.65614e-07
Cs6g18680	-1.83616	3.92729	2.898e-09	3.08553e-07
Cs2g13440	1.21745	4.76101	2.97077e-09	3.14654e-07
orange1.1t02078	1.7008	2.66777	3.05156e-09	3.21537e-07
Cs5g10190	-1.55684	3.24235	3.23362e-09	3.38964e-07
Cs2g31410	2.27188	1.97595	3.45603e-09	3.60419e-07
orange1.1t05715	1.32241	5.09935	3.64357e-09	3.78039e-07
Cs3g04540	4.44917	-0.25921	3.89756e-09	4.02339e-07
Cs1g18580	-1.93197	4.02317	4.15118e-09	4.26355e-07
Cs3g25420	1.26628	10.7062	4.91683e-09	5.02455e-07
Cs9g16810	-2.12887	7.05024	5.28103e-09	5.36975e-07
Cs8g12680	1.31396	5.78054	5.45581e-09	5.51987e-07
Cs2g19210	1.26557	5.16141	5.76541e-09	5.80422e-07
Cs9g01250	-1.25713	5.37694	6.14668e-09	6.15758e-07
Cs2g21460	1.06782	8.44574	6.60207e-09	6.58136e-07
Cs5g15510	2.34987	6.94138	6.72409e-09	6.67029e-07
Cs1g09420	1.17611	9.59614	6.84798e-09	6.76022e-07
Cs2g06730	-1.61644	4.63917	7.09155e-09	6.96685e-07
orange1.1t01260	2.18825	2.82192	7.15159e-09	6.99206e-07
Cs4g03580	-1.00365	7.08127	7.59704e-09	7.39203e-07
Cs1g26340	2.9336	3.27898	7.65331e-09	7.41132e-07
orange1.1t03798	-2.84826	0.950377	7.75668e-09	7.47583e-07
Cs2g16120	-2.95585	1.48802	8.47546e-09	8.13005e-07
Cs3g23530	-3.28513	0.991536	8.57951e-09	8.19122e-07
Cs3g15040	-1.08574	7.66492	8.62935e-09	8.2003e-07
orange1.1t00416	2.41683	2.91989	8.85255e-09	8.37327e-07
Cs1g19400	1.8575	2.37782	9.1763e-09	8.63932e-07
Cs1g01540	1.29094	9.20093	1.01219e-08	9.48565e-07
Cs2g18240	1.4092	4.32297	1.05061e-08	9.80058e-07
Cs4g04000	1.90842	3.76847	1.12245e-08	1.04229e-06
Cs7g10020	-1.23264	4.74725	1.14981e-08	1.06284e-06
Cs1g23870	-1.97001	1.78614	1.18909e-08	1.09417e-06
Cs3g26700	-1.31358	5.3908	1.28715e-08	1.17907e-06
orange1.1t00746	4.79048	-0.414748	1.4047e-08	1.28099e-06
Cs1g25850	-1.50628	3.18198	1.4327e-08	1.30068e-06
orange1.1t03382	1.13676	5.36434	1.46531e-08	1.32133e-06
Cs5g25920	2.21792	4.10443	1.46843e-08	1.32133e-06
orange1.1t01159	2.97272	0.292961	1.50436e-08	1.34769e-06
Cs1g24730	-1.62389	5.7257	1.58784e-08	1.41624e-06
Cs6g20120	1.24085	4.19577	1.69248e-08	1.50298e-06
Cs7g15480	-1.90671	3.16008	1.73152e-08	1.52545e-06
Cs5g27570	1.61	10.7919	1.73279e-08	1.52545e-06
Cs1g11350	1.12503	8.09804	1.75993e-08	1.54267e-06
Cs8g17160	1.87549	7.04406	1.8422e-08	1.60785e-06
Cs8g14960	1.21145	10.414	1.95723e-08	1.70095e-06
orange1.1t03576	1.56543	3.3074	2.0187e-08	1.74691e-06
Cs3g11760	1.12297	4.79136	2.2939e-08	1.97664e-06
Cs9g13980	1.87541	4.69769	2.45743e-08	2.10862e-06
Cs4g09140	1.26101	5.93479	2.58541e-08	2.20911e-06
Cs3g23040	-1.27687	4.10064	2.69606e-08	2.29402e-06
Cs2g21220	-1.37806	8.37056	2.74495e-08	2.32589e-06
Cs2g01750	-1.12201	4.31585	2.76041e-08	2.32928e-06
Cs9g04890	1.21777	6.01944	2.87104e-08	2.41262e-06
Cs3g11350	1.51178	3.15435	2.96494e-08	2.48128e-06
Cs1g06810	-1.64187	4.07882	3.02961e-08	2.52501e-06
Cs5g21190	2.2971	3.39888	3.07948e-08	2.55609e-06
Cs1g16750	1.43314	5.14405	3.21981e-08	2.66171e-06
Cs6g19920	-4.11722	1.6531	3.25412e-08	2.67918e-06
Cs3g22600	1.89943	2.51579	3.32859e-08	2.71848e-06
Cs2g22040	-2.25577	3.08447	3.70543e-08	3.01414e-06
Cs3g05870	-2.29899	0.818185	3.82397e-08	3.09818e-06
Cs5g05260	-1.97054	5.93986	3.98114e-08	3.21272e-06
Cs1g26070	-1.7911	4.79703	4.04298e-08	3.24973e-06
Cs1g16000	-1.66597	5.10202	4.67716e-08	3.74467e-06
Cs5g22260	-4.39301	-0.295345	4.85689e-08	3.87332e-06
Cs7g16260	1.05961	4.68103	4.94841e-08	3.9309e-06
Cs1g25540	-1.64406	3.60055	5.20113e-08	4.11557e-06
orange1.1t06010	1.94942	2.65354	5.30488e-08	4.1814e-06
Cs4g20420	1.56794	8.5658	5.36052e-08	4.2077e-06
Cs4g13160	-1.30733	3.97556	5.39924e-08	4.2077e-06
orange1.1t04857	1.12846	6.15753	5.40032e-08	4.2077e-06
Cs7g06840	-1.18806	4.82691	5.43804e-08	4.22091e-06
Cs7g28340	-1.09929	5.34183	6.03787e-08	4.66867e-06
Cs2g11950	-1.64236	5.62591	6.35943e-08	4.8816e-06
Cs8g05460	-2.28605	3.0525	6.36125e-08	4.8816e-06
Cs8g08820	-1.81617	2.70851	6.44087e-08	4.92412e-06
Cs4g10710	1.2488	4.42813	6.69894e-08	5.10223e-06
Cs2g18270	1.62592	2.92212	6.88076e-08	5.22116e-06
Cs9g15830	-1.22928	3.88075	7.11261e-08	5.37703e-06
Cs6g20340	1.38886	4.28087	7.45814e-08	5.59663e-06
Cs5g02910	-2.95752	1.76455	7.65925e-08	5.72641e-06
Cs9g06360	-1.26688	3.65496	7.75296e-08	5.77524e-06
Cs6g13560	-1.89944	4.55735	7.78679e-08	5.77928e-06
Cs5g21220	3.99083	-0.631162	8.78961e-08	6.49984e-06
Cs2g06990	3.93305	0.631527	8.89112e-08	6.55108e-06
Cs1g06760	1.19739	9.81823	9.20973e-08	6.76134e-06
Cs2g18250	1.77151	6.77436	9.29941e-08	6.80262e-06
Cs1g20120	2.26837	4.05289	9.4733e-08	6.90498e-06
orange1.1t01707	-1.26952	7.83408	9.58679e-08	6.9541e-06
orange1.1t00272	-3.13366	0.333609	9.60908e-08	6.9541e-06
Cs7g30970	1.49874	3.19071	9.64944e-08	6.95855e-06
Cs4g03700	1.16525	7.17875	9.71232e-08	6.97914e-06
Cs2g23660	-1.38865	6.27112	9.83524e-08	7.04258e-06
Cs2g17400	3.06655	0.63991	1.02601e-07	7.32106e-06
Cs2g21235	1.34794	4.40536	1.06882e-07	7.59984e-06
Cs7g14450	1.37557	5.29338	1.07617e-07	7.62542e-06
Cs1g12560	1.20032	4.21552	1.10638e-07	7.81228e-06
Cs7g02620	-2.14183	5.24898	1.14486e-07	8.05601e-06
Cs5g15530	-1.56753	4.1119	1.16897e-07	8.19729e-06
Cs4g17620	1.08317	4.37459	1.1834e-07	8.26994e-06
Cs4g13090	-1.85817	3.47587	1.20358e-07	8.38216e-06
Cs7g31800	-1.12017	6.3413	1.24634e-07	8.63583e-06
Cs1g11390	-1.15753	4.39142	1.25236e-07	8.63583e-06
Cs6g15460	1.14445	8.6833	1.29638e-07	8.88671e-06
Cs8g10180	1.14603	6.96778	1.29856e-07	8.88671e-06
Cs6g09710	-2.2059	1.37064	1.30224e-07	8.88671e-06
Cs5g16180	-1.50991	6.43438	1.49992e-07	1.01675e-05
Cs7g16680	-3.5264	-0.0203867	1.51059e-07	1.02058e-05
Cs8g06570	-5.15923	-0.766351	1.6102e-07	1.08427e-05
Cs7g22000	1.16868	6.23173	1.62762e-07	1.08879e-05
Cs2g06950	1.70108	4.29318	1.64522e-07	1.09432e-05
Cs2g28420	-2.61404	1.4012	1.65791e-07	1.09822e-05
Cs7g28970	-3.74173	-0.245564	1.68125e-07	1.11006e-05
Cs1g22350	-1.81733	1.64946	1.74329e-07	1.1473e-05
Cs9g11750	-1.42158	2.84651	1.80044e-07	1.18109e-05
Cs2g23750	1.3437	8.5101	1.83956e-07	1.20228e-05
Cs2g16800	-1.10401	4.57755	1.89818e-07	1.22934e-05
Cs3g17650	1.4928	6.77874	1.90433e-07	1.22941e-05
Cs7g01530	-1.66459	4.76402	1.92985e-07	1.24194e-05
Cs6g18580	-1.49914	6.4853	1.93992e-07	1.2439e-05
Cs6g10610	1.24907	5.51905	1.94512e-07	1.2439e-05
Cs4g01450	1.50769	9.43818	2.05872e-07	1.30556e-05
Cs2g25450	1.89532	3.71387	2.06081e-07	1.30556e-05
Cs2g14490	-1.32494	3.53571	2.14749e-07	1.35077e-05
Cs3g27020	-2.70122	0.993411	2.16673e-07	1.35577e-05
orange1.1t01124	2.04922	4.5293	2.2682e-07	1.41491e-05
Cs4g02670	2.49911	2.37037	2.49759e-07	1.5438e-05
Cs5g32090	1.59313	2.7354	2.5287e-07	1.55829e-05
Cs3g12130	1.42692	2.8555	2.60717e-07	1.60022e-05
Cs1g18460	1.34266	7.83348	2.61248e-07	1.60022e-05
Cs6g01740	-2.05991	2.42979	2.72783e-07	1.66586e-05
Cs9g10520	-1.11795	6.70249	2.73808e-07	1.66712e-05
Cs4g01430	1.27734	7.11474	2.84801e-07	1.72373e-05
Cs3g18660	-2.60689	1.11062	2.87633e-07	1.7357e-05
Cs6g07780	1.87035	2.59998	3.00807e-07	1.80983e-05
Cs1g24170	-1.72678	2.35798	3.18111e-07	1.90829e-05
orange1.1t00747	1.1589	4.81195	3.28959e-07	1.96756e-05
Cs7g17630	2.11305	2.18964	3.31283e-07	1.97565e-05
Cs9g05170	1.4222	3.65826	3.36803e-07	2.0027e-05
Cs9g07280	6.4795	-1.22725	3.44094e-07	2.04009e-05
Cs3g06480	-1.3857	3.85649	3.45711e-07	2.04372e-05
Cs3g16250	-1.15221	4.1472	3.49807e-07	2.06193e-05
Cs7g07980	1.75836	2.14924	4.0982e-07	2.4087e-05
Cs6g22020	-1.0207	6.20895	4.11536e-07	2.41182e-05
orange1.1t00611	3.63971	0.0636423	4.2318e-07	2.47293e-05
Cs1g02580	-1.84499	2.32726	4.32726e-07	2.51426e-05
Cs3g10250	1.21534	8.74317	4.49578e-07	2.60473e-05
Cs6g15450	2.1482	1.63546	4.62572e-07	2.6724e-05
Cs8g01650	3.43812	0.0628437	4.66551e-07	2.68775e-05
Cs8g15900	-1.17092	4.78111	4.75779e-07	2.71782e-05
Cs9g04120	3.44255	0.347534	4.82272e-07	2.74719e-05
Cs2g30320	1.60526	8.37897	4.86261e-07	2.76218e-05
Cs4g15220	1.20843	7.77584	4.91045e-07	2.78158e-05
Cs2g09520	-2.18349	1.59961	5.16554e-07	2.91796e-05
orange1.1t02547	1.48888	4.71627	5.78257e-07	3.25746e-05
Cs7g08620	1.35897	10.322	5.83044e-07	3.27535e-05
Cs5g04320	2.0144	1.40603	5.96731e-07	3.34301e-05
orange1.1t04895	2.59548	0.844155	6.05557e-07	3.38313e-05
orange1.1t03629	1.87655	2.6873	6.08661e-07	3.39116e-05
Cs6g14250	-1.07884	4.32354	6.29088e-07	3.49358e-05
Cs3g24860	1.12432	3.97855	6.3048e-07	3.49358e-05
Cs6g17360	-1.92001	4.07736	6.39407e-07	3.51003e-05
Cs7g07120	2.30785	3.26943	6.39552e-07	3.51003e-05
orange1.1t02202	-1.59815	2.36312	6.39936e-07	3.51003e-05
orange1.1t03040	1.0095	4.8494	6.40352e-07	3.51003e-05
Cs9g16980	-1.28381	6.08854	6.63843e-07	3.62901e-05
Cs3g19630	3.86403	-0.414762	6.69829e-07	3.65191e-05
Cs3g25470	-1.47334	2.99797	6.73089e-07	3.65909e-05
Cs7g17180	1.099	5.99508	6.74744e-07	3.65909e-05
Cs7g24940	2.36404	5.0234	6.79728e-07	3.67631e-05
orange1.1t04886	1.02525	7.33199	6.83008e-07	3.68426e-05
Cs5g25950	2.63433	4.76081	6.88958e-07	3.69674e-05
Cs9g14660	-1.32453	5.94088	7.04602e-07	3.77073e-05
Cs5g09690	-1.39586	6.41035	7.16901e-07	3.82648e-05
Cs8g04000	-3.8925	-0.122046	7.22629e-07	3.83892e-05
orange1.1t02242	2.47733	0.520216	7.23007e-07	3.83892e-05
Cs9g13610	-1.74507	4.19123	7.42458e-07	3.93194e-05
Cs3g18490	-1.75574	4.82205	7.61028e-07	4.0094e-05
Cs9g18330	-1.27667	8.03062	7.89889e-07	4.15069e-05
Cs8g15390	1.49112	2.15203	7.97728e-07	4.18108e-05
Cs3g24170	-1.49531	2.3092	9.03053e-07	4.68482e-05
Cs3g27320	1.7555	3.40686	9.11413e-07	4.71616e-05
Cs2g21480	-3.06282	-0.229174	9.34126e-07	4.81627e-05
Cs7g11830	2.27135	1.15239	9.35497e-07	4.81627e-05
Cs2g07420	-1.2034	3.64065	9.53609e-07	4.89712e-05
orange1.1t01118	-1.92819	1.18564	9.66018e-07	4.93591e-05
Cs9g05150	-1.4224	2.83289	1.00938e-06	5.11887e-05
Cs9g06490	2.85599	4.14559	1.02039e-06	5.16183e-05
Cs9g02190	-1.40506	8.06045	1.10939e-06	5.59815e-05
Cs1g04870	1.64337	9.19629	1.11334e-06	5.60419e-05
orange1.1t05409	-1.59901	1.82174	1.12583e-06	5.65306e-05
Cs1g26190	-1.2512	6.98809	1.12884e-06	5.6542e-05
Cs8g15610	-1.69447	4.11894	1.13383e-06	5.66526e-05
Cs3g20040	-1.02353	5.69517	1.15707e-06	5.7672e-05
orange1.1t03582	2.32454	0.576603	1.20621e-06	5.99743e-05
Cs3g04020	-2.42187	0.356062	1.2331e-06	6.11616e-05
Cs7g09020	-1.42394	2.97539	1.2516e-06	6.19282e-05
Cs5g05250	-6.84799	-0.939722	1.26672e-06	6.25242e-05
Cs5g19240	-2.93254	0.899403	1.30752e-06	6.43817e-05
orange1.1t00281	1.69777	1.73692	1.4082e-06	6.88394e-05
Cs9g06010	2.26915	1.44146	1.45618e-06	7.10139e-05
Cs7g10940	-1.04543	4.34492	1.46276e-06	7.11644e-05
Cs5g04300	-3.60122	-0.612246	1.46912e-06	7.1303e-05
Cs4g17420	1.24363	4.9488	1.48893e-06	7.17395e-05
Cs6g07970	1.57415	9.71822	1.49198e-06	7.17395e-05
Cs7g16980	-1.49454	4.04112	1.49222e-06	7.17395e-05
Cs5g08910	-1.9866	2.11378	1.69791e-06	8.12438e-05
Cs6g22230	-1.0239	6.68021	1.70863e-06	8.1565e-05
Cs3g07660	-3.24768	-0.244668	1.72418e-06	8.19225e-05
Cs9g17050	1.1342	5.14375	1.77722e-06	8.42461e-05
Cs9g13990	1.15327	4.80307	1.7848e-06	8.44084e-05
orange1.1t04360	-1.4328	2.5682	1.79673e-06	8.47758e-05
orange1.1t03617	1.51007	2.75384	1.83275e-06	8.6275e-05
Cs5g15150	-1.29609	3.47364	1.84865e-06	8.68223e-05
Cs2g11750	1.07547	5.16527	1.86165e-06	8.70309e-05
orange1.1t02992	1.04195	6.88473	1.86914e-06	8.71081e-05
Cs5g29050	1.28714	6.46544	1.87186e-06	8.71081e-05
Cs6g16200	-1.10614	4.04424	1.87661e-06	8.71298e-05
Cs5g01040	-1.17941	5.56728	1.89615e-06	8.76414e-05
Cs1g22750	-1.55104	2.79228	1.89625e-06	8.76414e-05
Cs2g25360	-2.30075	1.0725	1.92293e-06	8.86729e-05
Cs3g06780	1.94397	2.10251	1.96012e-06	8.98863e-05
Cs2g05320	1.07007	4.48042	1.96194e-06	8.98863e-05
Cs5g34410	1.30687	3.32886	1.96251e-06	8.98863e-05
Cs8g03980	-2.00596	1.18545	1.96726e-06	8.99014e-05
Cs5g35030	-2.30564	0.267514	1.98155e-06	9.03516e-05
Cs6g15880	1.39423	6.0045	2.00311e-06	9.11305e-05
Cs2g09600	1.18485	3.15057	2.05026e-06	9.30673e-05
Cs1g12440	1.60811	3.0946	2.08029e-06	9.42199e-05
Cs4g18340	5.67304	0.348988	2.12532e-06	9.60457e-05
Cs8g15600	3.69198	-0.860853	2.17719e-06	9.81717e-05
Cs6g20490	1.25771	7.44503	2.21313e-06	9.95712e-05
Cs7g28110	-1.45987	6.56609	2.25895e-06	0.000101409
Cs2g31390	-2.28056	3.97135	2.30568e-06	0.000103278
orange1.1t00573	-1.92877	0.999963	2.3261e-06	0.000103964
Cs7g30820	1.79703	1.50135	2.33823e-06	0.000104277
Cs6g17970	3.22656	-0.452056	2.37415e-06	0.000105647
Cs6g03210	-6.23691	-1.39857	2.44807e-06	0.000108699
Cs7g09900	-2.40817	1.30601	2.47668e-06	0.00010973
Cs4g05660	6.03814	4.81273	2.48694e-06	0.000109944
Cs6g16900	-1.3144	4.86531	2.5965e-06	0.000113957
orange1.1t03417	1.43705	4.50448	2.60011e-06	0.000113957
orange1.1t00246	2.77447	1.56389	2.60596e-06	0.000113967
Cs1g25280	-1.12486	5.61023	2.63026e-06	0.000114538
orange1.1t02713	-1.9224	2.28341	2.64426e-06	0.000114673
Cs3g20970	1.82568	4.12635	2.64464e-06	0.000114673
Cs5g32110	2.98654	4.96304	2.70408e-06	0.000117
Cs7g23120	-1.58681	1.97523	2.7293e-06	0.000117841
Cs1g03210	-1.91944	1.98121	2.73865e-06	0.000117994
Cs7g22760	1.41332	2.17659	2.7775e-06	0.000119415
Cs7g23810	-1.90217	1.01321	2.81092e-06	0.000120597
Cs7g09910	3.22712	-0.451836	2.89442e-06	0.000123658
Cs7g09080	-1.30694	2.80007	3.03968e-06	0.00012905
Cs5g05410	2.38137	2.23725	3.12728e-06	0.000132136
Cs3g21070	1.7904	4.29194	3.13836e-06	0.000132136
orange1.1t00666	1.79759	2.23054	3.1593e-06	0.000132743
Cs4g09670	-1.03083	4.88745	3.23158e-06	0.00013516
Cs3g16740	-1.49659	4.74437	3.41843e-06	0.000142162
Cs6g06960	4.02703	1.19704	3.50605e-06	0.000145212
Cs7g03100	2.9513	-0.326477	3.55792e-06	0.000147061
Cs1g02740	1.14847	4.87099	3.5803e-06	0.000147686
Cs8g10160	1.0495	4.59434	3.60718e-06	0.000148493
Cs1g01220	-2.16811	0.670956	3.77274e-06	0.000154995
Cs1g13600	-1.14421	7.46572	3.88915e-06	0.000159135
Cs7g22980	-1.72138	1.84819	3.94104e-06	0.000160934
Cs6g15240	-1.24027	2.96326	4.03982e-06	0.000164637
Cs3g09510	-1.16185	4.01203	4.08813e-06	0.000166273
Cs2g10540	-1.64118	1.85212	4.24733e-06	0.000172403
Cs1g22410	-1.36007	2.28444	4.26595e-06	0.000172814
Cs1g18540	-1.8029	7.76625	4.58883e-06	0.000184424
Cs8g05910	-2.54642	5.8246	4.67337e-06	0.000187451
orange1.1t04155	2.35081	0.481504	4.71089e-06	0.000188214
Cs3g03350	-2.81195	-0.0345333	4.8027e-06	0.000191505
Cs9g14190	-1.84409	1.31173	4.8204e-06	0.000191835
Cs2g10320	-1.34208	2.98085	4.97604e-06	0.000197257
Cs5g04690	-2.40378	2.07118	5.01846e-06	0.000198166
Cs6g21410	-1.24594	2.65817	5.03368e-06	0.000198381
Cs9g18700	1.06373	6.21517	5.04412e-06	0.000198408
Cs3g06440	1.16712	7.96981	5.11457e-06	0.000200791
Cs6g07700	2.45408	3.89175	5.28349e-06	0.000206625
Cs1g15170	-1.6333	2.63561	5.31477e-06	0.00020745
Cs5g17900	1.13519	5.88186	5.39751e-06	0.000210275
Cs1g06850	-1.79522	1.44324	5.46904e-06	0.000212655
Cs5g34450	-1.5304	2.77796	5.65589e-06	0.0002195
Cs4g07730	1.5187	2.63035	5.79809e-06	0.000224164
Cs7g08770	-1.8482	3.19338	5.90321e-06	0.000227795
Cs6g07410	3.44457	-0.741306	5.93677e-06	0.000228656
Cs5g02940	1.32671	6.07522	6.26443e-06	0.000240365
Cs4g18430	-2.50251	4.63211	6.30981e-06	0.00024165
Cs7g06140	-1.5772	1.89662	6.49753e-06	0.000248372
Cs4g02940	-3.9293	-1.07674	6.54772e-06	0.000249821
Cs4g02190	-1.47225	3.94691	6.64788e-06	0.000253167
Cs6g17410	-1.24221	6.51774	6.69373e-06	0.000254437
Cs1g03260	-4.45041	-0.246525	6.76326e-06	0.0002566
Cs8g09780	1.91342	7.78493	6.89055e-06	0.000260943
Cs6g12870	1.13301	8.07027	6.97945e-06	0.000263818
Cs1g03390	-2.40055	-0.0485465	7.14968e-06	0.000269751
Cs3g23950	-3.68137	2.69574	7.33362e-06	0.000275631
Cs7g18660	-2.75319	-0.197545	8.0343e-06	0.000299241
Cs3g21105	1.22678	6.015	8.23036e-06	0.000304868
orange1.1t04897	1.12794	4.77492	8.39099e-06	0.00030969
Cs7g12870	-1.06793	5.26633	8.51008e-06	0.000313516
Cs8g04550	-2.30063	1.90253	8.68434e-06	0.000318781
Cs5g11630	1.14307	6.30375	8.81919e-06	0.000323148
orange1.1t02122	-1.49783	3.34474	9.32947e-06	0.00034123
orange1.1t01992	-1.96546	1.06073	9.49129e-06	0.000346526
Cs4g17870	-1.51934	6.68809	9.67595e-06	0.000352004
Cs1g16440	-1.09084	5.04784	9.70765e-06	0.000352526
Cs5g07856	-4.71678	-1.10612	9.73208e-06	0.000352715
Cs1g09600	-1.45589	3.34975	9.86092e-06	0.000355873
Cs5g10170	-4.90189	-0.966148	9.86979e-06	0.000355873
Cs3g10820	1.23961	4.19896	1.04141e-05	0.000374109
Cs9g14330	1.04335	5.067	1.04713e-05	0.000374804
Cs5g08640	1.14379	6.43452	1.0487e-05	0.000374804
Cs7g07060	-1.14728	3.07208	1.06332e-05	0.000379363
Cs2g13040	-3.84723	-1.13559	1.06614e-05	0.000379701
Cs4g03320	-4.45787	-1.29427	1.08944e-05	0.00038728
Cs5g01290	-1.84119	3.53979	1.09123e-05	0.00038728
orange1.1t02319	2.06363	5.59328	1.09971e-05	0.00038915
Cs2g04760	-1.31593	4.50001	1.10032e-05	0.00038915
orange1.1t02024	-2.25521	1.49756	1.1117e-05	0.000392493
Cs4g13170	-4.40945	-1.32808	1.12619e-05	0.000396919
Cs2g12940	-1.54892	5.43459	1.13623e-05	0.000399763
orange1.1t05092	1.08828	5.06979	1.14636e-05	0.000402632
orange1.1t01837	1.48062	2.68507	1.15475e-05	0.000404881
Cs5g10180	1.12699	7.20575	1.22851e-05	0.000425606
orange1.1t03827	-1.9099	1.41249	1.2645e-05	0.000437328
Cs9g06870	1.03996	6.88148	1.29295e-05	0.000444898
Cs5g15130	-1.00239	5.654	1.29975e-05	0.000445728
Cs6g08260	-1.68214	1.38225	1.35401e-05	0.000461799
Cs6g01980	1.12537	7.49679	1.35438e-05	0.000461799
Cs1g21000	1.04605	5.77663	1.35569e-05	0.000461799
Cs5g09460	-1.65864	1.98538	1.35921e-05	0.000462222
Cs2g12080	-1.05769	5.61443	1.3636e-05	0.000462941
Cs2g31130	-1.9551	1.34397	1.3844e-05	0.000467071
Cs2g04440	-1.09716	3.83871	1.38445e-05	0.000467071
Cs2g14760	1.03503	5.79802	1.38495e-05	0.000467071
Cs1g08150	-2.21951	1.28919	1.38907e-05	0.000467685
Cs5g22080	2.0352	1.68379	1.39692e-05	0.000469396
Cs4g07310	-1.9012	0.51743	1.39877e-05	0.000469396
Cs5g29340	-1.00083	3.84504	1.41482e-05	0.000473999
Cs3g15530	1.06099	4.35201	1.43509e-05	0.000478023
Cs3g09020	2.12941	0.314738	1.5125e-05	0.000497705
Cs3g16430	1.49673	3.00195	1.53258e-05	0.0005035
Cs4g17260	-1.26224	6.79079	1.60347e-05	0.000524248
Cs7g10810	-1.16106	3.48998	1.64172e-05	0.000535892
Cs7g28055	1.11589	4.44009	1.65332e-05	0.000538058
Cs1g14300	1.68392	2.32921	1.65365e-05	0.000538058
Cs8g05000	-2.18582	4.70914	1.73458e-05	0.000560802
Cs1g14630	-1.40425	2.1792	1.76075e-05	0.000567458
Cs5g13070	1.31722	3.70212	1.78086e-05	0.00057303
Cs4g14230	1.17604	5.75306	1.8121e-05	0.000581243
Cs2g19680	-1.14521	3.13197	1.86705e-05	0.000596051
Cs5g03280	1.08244	4.65076	1.8729e-05	0.000596979
Cs3g02020	1.48829	3.72622	1.96036e-05	0.00062309
Cs3g16380	-2.13828	6.45217	1.96237e-05	0.00062309
Cs7g22730	1.1927	9.24777	1.96468e-05	0.00062309
Cs9g14590	1.65431	2.30709	1.97736e-05	0.000624402
Cs8g12020	-2.57798	-0.106446	2.00407e-05	0.000631856
Cs2g14990	1.95785	1.70821	2.0103e-05	0.000632841
Cs8g17960	-2.45812	5.83212	2.02782e-05	0.000637368
Cs2g17870	-1.05671	3.68272	2.03935e-05	0.000639097
Cs4g05190	2.27663	4.02589	2.03961e-05	0.000639097
orange1.1t03781	-1.15755	4.00609	2.11162e-05	0.000658617
Cs8g14950	1.41574	9.38694	2.13044e-05	0.000662457
Cs7g08980	-1.65265	2.48682	2.13822e-05	0.000663862
Cs2g07050	-1.63188	2.50143	2.14715e-05	0.000665615
Cs5g22170	-1.02321	5.33192	2.15352e-05	0.000666576
Cs5g11840	2.73593	-0.103566	2.19969e-05	0.000679267
Cs6g16350	-1.55339	6.01741	2.23131e-05	0.000687513
Cs5g33940	-1.02565	3.4798	2.29538e-05	0.000704543
Cs1g11080	2.67104	-0.0458305	2.29697e-05	0.000704543
Cs9g03570	1.09326	6.15923	2.3559e-05	0.000720446
Cs4g03200	-1.20463	6.06323	2.42503e-05	0.000738256
Cs2g03280	3.27468	-0.415366	2.43539e-05	0.000740301
Cs8g07470	1.62386	3.30765	2.48974e-05	0.000754566
Cs2g18260	1.99916	1.42155	2.51203e-05	0.000760187
Cs2g05430	2.11543	1.03004	2.51644e-05	0.00076039
orange1.1t02947	1.32315	5.24126	2.52089e-05	0.000760605
Cs9g06150	-1.58362	2.14331	2.52767e-05	0.000761521
Cs7g08680	-1.95245	2.08739	2.55576e-05	0.000768844
orange1.1t02191	-1.39397	1.87851	2.60934e-05	0.000782647
Cs2g17030	1.1025	6.79279	2.63634e-05	0.000789582
Cs2g06440	-1.04272	6.03713	2.64526e-05	0.00079109
Cs2g06180	-2.71581	-0.492016	2.70355e-05	0.00080519
orange1.1t04113	-1.63322	1.07967	2.71162e-05	0.00080519
Cs6g05280	1.04599	5.36902	2.71221e-05	0.00080519
orange1.1t02504	-1.62916	1.38682	2.72751e-05	0.000808553
Cs5g07854	-5.07116	-0.167088	2.81233e-05	0.000830066
Cs8g03230	-1.21951	2.46895	2.81763e-05	0.000830426
Cs7g27620	4.09386	-0.964373	2.84963e-05	0.000838286
Cs6g07850	-3.53607	-0.965476	2.89204e-05	0.000848664
Cs7g26410	-1.09968	7.40759	2.97964e-05	0.000871856
Cs1g02750	2.60771	5.20893	3.04569e-05	0.000889698
Cs5g03580	-1.9642	0.563997	3.04937e-05	0.000889698
Cs8g20420	-1.66976	7.17257	3.10398e-05	0.000904334
Cs1g25530	-1.04435	4.82214	3.16712e-05	0.000920094
Cs2g06910	5.90253	-1.63184	3.19245e-05	0.000924811
Cs2g10990	1.08263	5.49748	3.22808e-05	0.000933801
Cs1g02710	1.66285	3.58734	3.25855e-05	0.000941277
orange1.1t04139	1.23993	8.50773	3.34211e-05	0.000964045
orange1.1t01712	-2.59882	-0.0914133	3.35768e-05	0.000967164
Cs8g16920	-1.30679	2.38212	3.3641e-05	0.000967642
Cs2g19970	1.27403	5.24498	3.49306e-05	0.0010019
Cs3g12730	-1.48641	1.87466	3.52617e-05	0.00100856
Cs3g26760	-1.84598	0.688383	3.54645e-05	0.00101293
Cs8g06610	2.5313	-0.259343	3.59111e-05	0.00102363
Cs2g24030	-2.14011	0.209638	3.59399e-05	0.00102363
Cs2g13910	-1.84307	8.32417	3.63711e-05	0.0010325
Cs7g12250	-1.20981	3.64421	3.64037e-05	0.0010325
Cs5g09080	-2.84883	0.387166	3.6548e-05	0.00103372
orange1.1t03632	1.29671	3.79163	3.71166e-05	0.00104834
Cs7g30610	-1.38807	1.79073	3.72767e-05	0.0010514
Cs1g18130	-1.30082	5.34263	3.76406e-05	0.00105873
Cs5g20500	-1.18372	3.38552	3.80543e-05	0.00106741
Cs5g30790	2.10774	5.48153	3.81801e-05	0.00106946
Cs7g27450	-1.79155	1.16711	3.94111e-05	0.00110243
Cs9g04030	-1.91078	5.51831	4.05681e-05	0.00113013
Cs6g12110	-1.71902	3.03036	4.16107e-05	0.00115505
Cs5g04330	1.02965	8.87103	4.16332e-05	0.00115505
Cs2g03430	1.26811	2.79748	4.20687e-05	0.00116434
Cs1g14810	-1.83131	0.555058	4.34231e-05	0.0011901
Cs9g17380	1.85136	5.51037	4.3717e-05	0.00119654
Cs7g16380	1.1084	3.23284	4.53222e-05	0.0012347
Cs6g19790	-2.22778	0.209602	4.55065e-05	0.00123664
orange1.1t02739	-2.51524	-0.261166	4.55762e-05	0.00123664
Cs4g15770	1.24261	2.04637	4.56665e-05	0.00123664
Cs3g21660	1.18714	5.82125	4.58832e-05	0.00123915
Cs8g08990	-1.39457	1.76648	4.60165e-05	0.0012411
Cs9g09120	-2.75949	0.0330171	4.6277e-05	0.00124483
Cs6g09810	1.70802	3.2838	4.6763e-05	0.00125624
Cs9g14040	-1.21137	4.28688	4.69954e-05	0.00125916
Cs2g10720	1.70435	3.19453	4.71292e-05	0.00126108
Cs9g08340	2.78283	-0.452135	4.8983e-05	0.00130896
Cs3g25000	-1.18481	3.13928	4.93565e-05	0.00131721
Cs5g02010	-1.58507	3.98905	5.0339e-05	0.00134167
Cs5g34060	1.27062	3.7084	5.12575e-05	0.00136436
Cs3g18030	1.02276	9.40393	5.14998e-05	0.00136902
Cs4g03140	-2.61373	4.08768	5.26384e-05	0.0013902
Cs1g25560	1.16214	3.06256	5.29218e-05	0.00139226
Cs3g18050	-2.04516	2.94159	5.32133e-05	0.00139632
Cs3g16650	1.48692	2.37735	5.45298e-05	0.00142718
Cs7g30680	-1.4381	1.33418	5.52885e-05	0.00144518
Cs8g05490	-1.29201	2.8946	5.56413e-05	0.00145253
Cs6g01720	1.69571	1.44646	5.5982e-05	0.00145955
Cs5g17920	1.13883	7.51409	5.72191e-05	0.00148799
Cs7g31000	-2.0915	9.31545	5.80759e-05	0.00150642
Cs9g10530	-1.16437	3.18441	5.83885e-05	0.00151067
orange1.1t05017	-1.91865	2.23758	5.86283e-05	0.00151495
Cs7g06130	-1.76299	3.53351	5.87434e-05	0.001516
Cs5g28650	1.95024	1.13371	5.94376e-05	0.00153003
Cs1g22770	1.01354	7.00552	5.96756e-05	0.00153269
Cs3g19420	-1.6746	4.99945	6.05737e-05	0.00155142
Cs7g06720	-2.455	1.34364	6.19444e-05	0.00158254
Cs8g02230	2.08913	0.451375	6.33134e-05	0.00161346
Cs3g18060	-1.81922	5.80961	6.37183e-05	0.00162122
Cs7g02920	-1.9893	0.487958	6.37774e-05	0.00162122
Cs5g16870	2.19378	0.421183	6.45749e-05	0.0016374
Cs2g24960	-1.36297	3.1525	6.49335e-05	0.0016424
Cs6g20170	-1.8786	3.45103	6.6432e-05	0.00167433
Cs5g29930	1.5597	5.05596	6.64431e-05	0.00167433
Cs2g03950	-1.10599	3.09547	6.86811e-05	0.00171585
Cs2g05510	-1.69044	4.00051	7.071e-05	0.0017622
Cs7g16030	-1.46227	7.56393	7.18385e-05	0.00178595
Cs5g27640	-1.76042	2.07614	7.23508e-05	0.00179649
orange1.1t04036	-1.46448	5.1285	7.28739e-05	0.00180727
Cs6g08610	1.1654	3.6605	7.31852e-05	0.00181278
Cs7g29980	-1.87299	3.52733	7.50882e-05	0.00185331
Cs6g09660	-1.39942	1.66261	7.65955e-05	0.00188577
orange1.1t01021	-1.20365	6.71482	7.78601e-05	0.00191459
Cs8g14810	-2.68974	-0.511451	7.93123e-05	0.00194794
Cs9g09720	1.17284	4.4875	7.9537e-05	0.0019511
Cs2g20400	-2.27018	0.0986927	8.01923e-05	0.00196008
Cs5g20610	8.54305	0.521148	8.0843e-05	0.00197362
Cs5g27860	1.74314	2.51584	8.26053e-05	0.0020094
Cs9g11040	-1.58583	1.22137	8.34594e-05	0.00202268
Cs3g09140	1.73772	0.638867	8.35488e-05	0.00202268
Cs3g16510	1.37607	2.99649	8.47616e-05	0.0020496
Cs5g04620	-1.0197	3.39486	8.6164e-05	0.00207857
Cs2g20020	-1.04545	3.2442	8.76381e-05	0.00210912
orange1.1t05411	-1.53322	3.21993	9.08101e-05	0.0021803
Cs2g16940	-1.38268	2.49725	9.2705e-05	0.00221296
orange1.1t03024	1.62265	6.2517	9.27076e-05	0.00221296
Cs9g18910	1.20816	3.77518	9.50467e-05	0.00226067
Cs2g31250	-1.54051	2.8973	9.53404e-05	0.00226359
Cs9g08880	1.38215	2.74567	9.55037e-05	0.00226359
Cs4g06630	-1.28058	3.52468	9.56672e-05	0.00226483
Cs8g02760	-1.27046	2.5287	9.71621e-05	0.00229488
orange1.1t02385	-2.28326	2.74736	9.84849e-05	0.00231809
Cs1g23480	-3.58859	0.0324195	9.84869e-05	0.00231809
Cs1g21970	-1.10318	3.92181	0.000101346	0.00238264
orange1.1t04831	-1.36582	1.59159	0.00010202	0.00239293
Cs6g13410	-1.1879	4.42903	0.000103121	0.0024132
Cs7g16890	-4.19816	-1.4724	0.000103519	0.00241807
orange1.1t00266	-1.36075	3.43511	0.000103567	0.00241807
Cs7g26690	-2.97385	-0.633624	0.000104579	0.00243663
Cs7g23450	-1.04753	3.40913	0.000104602	0.00243663
Cs7g28120	-5.68687	-1.76601	0.0001053	0.00245009
Cs8g14710	1.02267	3.64176	0.000107715	0.00249202
orange1.1t02243	-1.67476	1.37703	0.000108898	0.00251203
Cs2g30870	-1.02962	3.1795	0.000109339	0.00251814
orange1.1t02332	-1.2018	5.33541	0.000114204	0.00261833
Cs8g15890	-1.37511	2.66593	0.000116456	0.00266096
orange1.1t00510	-1.39833	2.48255	0.000118014	0.00269052
Cs5g04130	-1.10304	2.8931	0.000118163	0.00269089
Cs8g14700	-2.42459	2.87676	0.000118351	0.00269215
Cs7g05970	-1.39768	3.79586	0.000118549	0.00269365
Cs7g30170	-1.26136	4.22405	0.000119895	0.00271814
Cs6g19630	1.37892	5.24123	0.000120758	0.00273163
Cs3g02870	-1.36646	2.20621	0.00012386	0.00278938
Cs3g10480	1.23928	3.78401	0.000124342	0.00279531
orange1.1t00472	-1.51349	5.28287	0.000125006	0.00280278
Cs6g18510	-1.2989	2.80146	0.000125678	0.00280851
Cs6g18210	-1.00832	3.39163	0.000125827	0.00280851
Cs7g29420	-1.39555	1.54589	0.000126162	0.00280851
Cs8g05120	-1.66483	3.7874	0.0001266	0.00281371
Cs8g03110	-1.07973	2.81782	0.00012778	0.00283373
Cs7g12860	-1.12615	2.89131	0.000130437	0.0028895
Cs4g03940	1.10759	3.66244	0.00013115	0.00290214
Cs4g11440	1.03021	4.19567	0.000132451	0.00292456
Cs9g17670	1.81705	2.92845	0.000133377	0.00294182
Cs3g11280	1.01416	4.23972	0.000133564	0.00294275
Cs8g20410	-1.42246	1.38231	0.000134037	0.002946
Cs4g17810	-1.47457	1.70047	0.00013506	0.00296288
Cs7g26250	-2.58045	-0.328575	0.000135504	0.0029694
Cs9g02640	-1.01392	3.25003	0.000138715	0.00303651
Cs6g10500	-1.51466	0.82621	0.000139682	0.00305439
Cs4g18100	2.25441	0.34777	0.000140289	0.00305998
Cs9g14600	-1.67543	2.89265	0.000140374	0.00305998
Cs7g13200	-1.11989	6.03	0.000140604	0.00306138
Cs8g19450	1.1559	3.00443	0.000141149	0.00306995
Cs8g11480	-2.33098	0.417491	0.000142179	0.00308052
Cs9g09890	-3.51894	-1.36276	0.000142361	0.00308052
orange1.1t03822	-1.34365	3.46726	0.000142544	0.00308052
Cs6g11920	1.29723	3.36971	0.000142878	0.00308446
orange1.1t02032	-1.49212	0.979831	0.000147022	0.00316003
Cs6g13640	-1.41711	4.90523	0.000148079	0.0031765
Cs8g19480	1.11174	3.51101	0.000148608	0.00318451
Cs2g27640	-1.47114	1.94773	0.000150584	0.00321448
orange1.1t01926	-1.53333	3.28095	0.000150639	0.00321448
Cs1g11380	-1.343	1.55987	0.000152164	0.00323277
Cs4g03210	-3.81653	-0.183207	0.000152217	0.00323277
Cs4g03220	-3.54978	1.42994	0.000152291	0.00323277
Cs8g04970	1.79287	0.71621	0.000152934	0.00323964
Cs2g09460	1.15015	4.83004	0.000153434	0.00324685
Cs5g25090	-1.82586	6.95725	0.000153625	0.00324752
Cs5g17260	-1.32869	1.76284	0.000154808	0.00326913
Cs4g01480	-1.71466	0.705072	0.000159454	0.00336026
Cs6g19280	-1.27479	2.44793	0.000161364	0.00339347
Cs7g19500	1.15969	4.20623	0.000163418	0.00342959
Cs7g31360	-1.45617	6.1039	0.00016467	0.00344875
Cs4g03060	-2.53883	2.75442	0.000165108	0.00345435
Cs5g21250	1.87237	2.20963	0.000173765	0.0036243
Cs7g31640	-2.40638	0.124451	0.000176024	0.0036639
Cs4g11670	-1.78491	1.13611	0.000177851	0.00368684
orange1.1t02795	1.23945	3.0896	0.000178039	0.00368696
orange1.1t01910	-1.63224	0.84859	0.000178523	0.00369323
Cs2g27460	1.57384	1.44205	0.000180309	0.00372261
orange1.1t00292	-2.99619	1.2928	0.000180968	0.00372864
Cs9g06170	-5.61058	-1.81327	0.000181612	0.00373812
Cs2g12630	-3.208	-1.19702	0.000186199	0.0038094
Cs1g09140	-1.2143	2.49055	0.00018754	0.00382913
Cs6g20290	3.31836	-0.836307	0.000188848	0.00385157
Cs5g18330	-2.79699	0.0605468	0.000189018	0.00385157
Cs1g02330	2.89596	-1.13412	0.00019052	0.00387829
Cs8g02560	-1.17049	2.31547	0.000193789	0.00393696
Cs5g29830	1.21667	5.96013	0.000195625	0.00396238
Cs5g28770	-1.23404	3.11546	0.000196317	0.00397198
Cs7g13190	-5.8288	-1.67582	0.000196594	0.00397198
Cs8g09070	-1.80947	0.0340493	0.000196685	0.00397198
Cs7g08350	-1.63711	1.20959	0.000198038	0.00399534
Cs5g11310	1.11667	5.37943	0.000198302	0.0039967
Cs3g17970	-1.22467	2.48127	0.000200055	0.00402599
Cs2g18105	-3.38385	-1.07633	0.000200349	0.00402599
Cs4g19560	-1.11925	3.31205	0.000202422	0.00405561
Cs2g07550	1.34341	2.06027	0.000204607	0.00409134
Cs6g09320	1.55376	0.873605	0.000207744	0.00414185
orange1.1t03183	-1.69876	0.279376	0.000208737	0.00415756
Cs4g10310	-1.06961	6.95807	0.000210676	0.00418798
orange1.1t02075	-1.61114	1.47832	0.000212576	0.00422163
Cs5g10550	1.14636	9.07089	0.00021491	0.00425966
Cs1g19190	-1.50907	2.67369	0.00021612	0.00427531
Cs7g13740	-1.26785	2.14884	0.000219058	0.00431295
Cs6g16780	-1.3514	1.23326	0.000219083	0.00431295
Cs7g02970	2.24765	2.3765	0.000226093	0.0044287
Cs7g10000	-1.62227	1.36012	0.000226269	0.0044287
Cs4g05510	-1.20489	3.56382	0.000228085	0.00445994
Cs5g18420	1.85049	0.757329	0.000229494	0.00447748
orange1.1t01250	-8.42111	0.410455	0.000229642	0.00447748
Cs1g21270	-2.09432	0.950752	0.000229878	0.00447778
Cs8g14600	1.00895	3.87163	0.000230866	0.00449272
Cs5g27880	-1.01827	5.46653	0.000232279	0.00451589
orange1.1t01115	-1.50192	0.986129	0.000232959	0.0045248
orange1.1t03764	-1.00946	7.33339	0.000238446	0.00461641
Cs3g26900	-5.61136	-1.81312	0.000238584	0.00461641
orange1.1t04514	3.96358	1.91658	0.000238882	0.00461777
Cs3g13300	-1.06771	6.85467	0.000240223	0.00463489
Cs3g06500	-1.49082	0.951494	0.000243564	0.00469045
Cs4g10750	-1.39542	2.33863	0.000246866	0.00474506
Cs6g09400	-1.15328	5.38176	0.000247838	0.00475923
Cs3g14240	2.21813	1.8062	0.000248946	0.004776
Cs2g22690	3.10164	-0.991271	0.000250786	0.00480225
Cs4g19060	-1.75641	2.85819	0.000251853	0.00481361
Cs1g01180	1.10283	2.46117	0.000257407	0.00491054
orange1.1t01658	1.60127	1.421	0.00026022	0.00495955
Cs8g20900	1.09143	2.94541	0.000260911	0.00496472
Cs5g09230	-1.20385	3.8627	0.000261442	0.00496472
Cs7g30410	5.53818	-1.86131	0.000261468	0.00496472
Cs3g16490	-1.27158	3.14753	0.000264185	0.00500696
Cs9g06060	-1.33148	1.51753	0.000265231	0.0050221
orange1.1t01708	-1.27848	1.97574	0.000267216	0.00505028
Cs5g22390	-1.6474	1.00661	0.000267849	0.00505693
Cs5g22460	-1.30296	1.84111	0.000268065	0.00505693
Cs7g24640	-2.27193	-0.550231	0.000273991	0.00515916
orange1.1t01154	-2.57415	0.942531	0.000274485	0.00516367
Cs9g16960	-1.12143	2.60937	0.000275135	0.00517111
Cs4g11690	-1.66383	3.10643	0.000276373	0.00518958
Cs5g28560	-1.19425	2.49276	0.000277427	0.00520457
Cs3g11670	-1.25684	1.8105	0.00027905	0.00521577
Cs3g22910	-1.23145	4.47903	0.000279822	0.00522335
Cs7g29020	-1.03801	4.37191	0.000279969	0.00522335
orange1.1t00787	3.63728	-1.29262	0.000282313	0.00526226
orange1.1t03684	1.59546	0.812651	0.000282607	0.00526291
Cs1g26270	-2.79059	-0.965492	0.000286734	0.00533
orange1.1t03726	2.00479	-0.259343	0.000291517	0.00540902
Cs5g30390	-2.79814	2.85713	0.000292981	0.00543124
Cs6g18850	-1.15253	2.06998	0.000304072	0.00561635
Cs9g09370	-1.58573	1.96172	0.000305965	0.00564108
Cs7g06320	-1.21357	7.41252	0.000312288	0.00573685
orange1.1t00194	-1.44108	6.08856	0.000312839	0.00574177
Cs1g13320	1.21111	2.03655	0.000317053	0.00580864
Cs3g14580	3.06397	-1.01826	0.000320233	0.00586161
orange1.1t03524	-1.68707	0.408793	0.000324387	0.00592699
Cs1g22050	-1.03953	4.96294	0.000326073	0.00594711
Cs4g13440	-1.08675	1.98317	0.000327803	0.00596795
Cs9g14100	1.67658	1.59532	0.000331079	0.00601146
Cs7g25680	-1.23192	7.55371	0.00033108	0.00601146
Cs5g28310	3.45321	-0.275222	0.000331487	0.00601164
Cs2g30370	1.22381	1.63881	0.00033168	0.00601164
Cs9g16440	-1.04289	3.67694	0.00033361	0.00602513
Cs1g11740	-1.15658	2.93496	0.000338068	0.00608511
Cs8g09010	-2.13045	-0.24527	0.000340459	0.00612165
Cs6g21340	-1.30749	2.19766	0.000341002	0.00612598
Cs7g01390	-1.41828	5.35118	0.000344888	0.00618486
Cs7g07900	-1.2348	4.4452	0.000345556	0.00619138
Cs7g13970	-1.12279	2.2738	0.000349595	0.00625274
Cs4g07930	5.45262	-1.91197	0.000351374	0.00627074
Cs4g01920	1.16843	3.17576	0.000352821	0.00628281
Cs5g12850	-4.54929	-1.22862	0.000354477	0.00630677
Cs6g11570	-2.52521	2.56427	0.000355708	0.00632054
Cs2g04700	-1.74844	0.161792	0.000361889	0.00640346
orange1.1t02820	1.50929	2.05685	0.000364165	0.00642852
Cs4g03730	1.33041	3.32654	0.00036516	0.00643492
Cs5g25820	-1.72715	0.71411	0.000366453	0.0064521
Cs3g18070	-1.77293	7.96247	0.000368901	0.0064896
orange1.1t01656	-1.03285	2.95818	0.000369565	0.00649565
Cs7g11820	1.46831	0.843811	0.000370569	0.00650768
Cs6g12830	-1.32171	1.2739	0.000371807	0.00651817
Cs6g01070	-1.05536	5.29178	0.000373637	0.00654461
Cs6g18920	-1.88552	0.793829	0.000374041	0.00654604
Cs5g02310	1.11229	2.42885	0.000377819	0.00660079
Cs8g08710	-1.067	3.28161	0.000380441	0.00663521
Cs9g16970	-1.01859	4.03941	0.000385613	0.00671389
Cs3g23560	1.23833	3.86002	0.000388606	0.00675443
Cs7g11940	-5.15415	-0.767739	0.000396385	0.00686033
Cs4g04880	3.89648	-1.67488	0.000398471	0.00688797
Cs1g16560	-1.02434	6.38105	0.000401956	0.00693903
orange1.1t02448	1.08335	3.28779	0.000402875	0.00694447
Cs2g07740	1.26641	2.073	0.000403237	0.00694447
Cs5g31670	-1.1204	3.00638	0.000403295	0.00694447
Cs7g06120	-1.53122	4.77642	0.000403948	0.00694982
orange1.1t04653	-1.44922	1.02733	0.000404302	0.00695004
Cs9g14380	-6.51227	-1.1973	0.000406071	0.00697454
orange1.1t01967	-1.28117	4.65997	0.000409223	0.00702276
Cs4g03390	-1.44767	2.17575	0.000410088	0.00703167
Cs7g30350	-1.16674	1.66744	0.000410972	0.00704088
Cs3g13410	-3.35203	-1.47224	0.000412995	0.00706828
Cs9g17780	-1.14036	1.64997	0.000413267	0.00706828
Cs3g25890	-1.06978	4.92725	0.00041746	0.00711606
Cs5g09930	-1.2152	1.71351	0.000419884	0.00715139
Cs1g21390	1.07316	2.50323	0.000420732	0.00715983
Cs2g17100	-1.89091	2.25662	0.000421678	0.00716524
Cs5g03480	-1.89174	-0.328091	0.000425328	0.00720851
Cs9g16920	1.83235	0.212019	0.000425365	0.00720851
Cs5g16000	1.55416	0.843896	0.000429081	0.00726445
Cs1g01800	-1.17958	5.00501	0.000439706	0.00742062
Cs6g12400	-1.59863	0.915055	0.000453735	0.00761946
Cs1g15840	-1.16711	2.50562	0.000456799	0.00765825
orange1.1t01320	-3.39512	-0.76719	0.000458226	0.00767141
Cs6g17210	-1.79186	0.526827	0.000459759	0.00768254
Cs4g01950	-2.55887	-0.0211664	0.00046791	0.00779314
Cs1g10900	-1.51079	0.762581	0.000468598	0.00779821
Cs5g24820	-8.63697	0.61494	0.000469644	0.00780923
Cs2g29820	2.34227	-0.509332	0.000474556	0.00787801
Cs6g15730	-1.245	5.3846	0.000478678	0.00793996
Cs3g15650	-2.0807	0.0997304	0.000490053	0.0080825
orange1.1t01583	-2.19342	-0.491983	0.000501162	0.00822569
Cs7g03680	-3.49881	-0.99266	0.000508653	0.00831541
Cs4g04150	-1.11863	2.48056	0.00051009	0.00832519
Cs3g20070	-1.68162	1.98815	0.000515815	0.00839841
orange1.1t04419	-1.55565	1.24455	0.000516917	0.00840174
orange1.1t00271	-1.57902	0.57383	0.000518524	0.00841556
Cs5g31180	-2.49049	-0.654761	0.000523095	0.00847475
Cs5g09240	-2.10484	0.573244	0.000523421	0.00847475
Cs7g31410	1.37751	2.30682	0.000526128	0.00849829
orange1.1t03837	1.52289	1.06909	0.000530401	0.00854693
Cs4g03740	1.61245	4.07367	0.000532073	0.00856709
Cs7g24790	1.06483	2.69966	0.000540742	0.00868604
Cs7g05360	1.14246	3.16774	0.000541259	0.00868609
Cs2g09500	1.79895	0.0756518	0.00054684	0.00875633
Cs3g24200	-1.50498	1.58775	0.000553366	0.00883995
Cs3g13440	-1.32242	1.4782	0.00055542	0.0088519
Cs2g01220	-1.14499	2.10555	0.000561669	0.00892448
Cs8g05570	-1.58811	0.87888	0.000561729	0.00892448
Cs7g15750	-1.23559	1.5509	0.000562841	0.00893515
Cs5g24700	-1.39064	1.59181	0.000567171	0.00898286
Cs4g09090	2.16927	1.65337	0.000573457	0.00905421
Cs4g15930	-1.01049	5.72118	0.00057632	0.00909236
Cs7g04390	1.36252	5.83371	0.00058443	0.0092085
Cs1g25680	-2.55116	-0.612248	0.000589179	0.00925931
Cs2g28760	-1.60629	5.70204	0.000594379	0.00933382
Cs2g07330	-1.66126	1.34449	0.000598862	0.00939696
Cs9g06620	1.11044	8.22279	0.000600826	0.00942051
Cs4g14890	-1.89816	6.56251	0.000604547	0.00946425
Cs5g32150	-1.40586	2.98803	0.00062791	0.00979051
Cs2g26640	-2.63549	-0.551296	0.000630311	0.00981355
Cs3g18690	-1.29923	5.48985	0.000665656	0.0102629
Cs1g03020	2.22273	-0.103963	0.000668962	0.0103061
Cs6g10490	-1.36261	1.65315	0.000674043	0.0103686
orange1.1t03363	1.23131	3.08965	0.000694591	0.0106445
Cs3g14590	1.02155	2.62316	0.000711734	0.0108826
Cs4g03130	-3.45314	4.24818	0.000715358	0.0109298
Cs3g18710	1.10491	3.79034	0.000716722	0.0109354
Cs7g30500	1.22885	2.58602	0.000717278	0.0109354
orange1.1t01429	-1.58051	0.645986	0.000717338	0.0109354
Cs8g18200	1.24016	1.34229	0.000724789	0.0110407
Cs5g01440	2.27978	2.25931	0.000730172	0.0111143
Cs5g32470	-1.02396	2.11526	0.000735185	0.0111823
Cs3g04150	2.71467	0.576444	0.000738814	0.0112207
Cs2g02390	-1.60083	1.23224	0.00075183	0.0113759
Cs5g22660	-5.528	-1.86245	0.000765285	0.0115451
Cs2g07100	1.01054	6.62432	0.000768866	0.0115906
Cs4g05760	-1.42993	4.11677	0.000783656	0.0117628
Cs3g24530	-1.54274	0.654299	0.000784724	0.0117628
Cs5g13450	1.72241	1.59055	0.000802677	0.0119497
Cs6g12480	-1.62519	8.23813	0.00080727	0.0120005
Cs7g25590	-1.17173	1.96219	0.000811577	0.0120469
Cs4g03050	-2.82936	2.69167	0.000818783	0.0121354
Cs5g33130	-1.03633	4.90406	0.000820457	0.0121354
Cs9g17390	4.15505	-1.5096	0.000827193	0.0122074
Cs2g03080	-2.49801	-0.167089	0.000827918	0.0122092
Cs2g02660	-1.08648	1.91617	0.000831451	0.0122347
Cs5g02660	1.76207	2.97489	0.000832671	0.0122438
Cs5g17870	-1.15809	3.11548	0.000837361	0.0123003
Cs6g15560	-1.57827	3.76366	0.000845949	0.0124032
Cs8g02530	-3.75882	-1.19727	0.000847126	0.0124115
Cs9g14860	2.34471	-0.509542	0.000851175	0.0124618
Cs6g09560	-1.29225	1.9853	0.00085678	0.0125259
orange1.1t01704	2.1406	0.199851	0.000857895	0.0125332
Cs5g19990	2.85898	-0.396373	0.000863402	0.0125955
Cs7g18970	-1.1836	7.21971	0.000864685	0.0126052
Cs1g18450	-2.37117	-0.887272	0.000865437	0.0126071
Cs7g22840	-2.27042	-0.550941	0.000870356	0.0126516
Cs8g15030	1.59751	0.247159	0.000876991	0.0127331
Cs7g05210	-1.00605	3.12211	0.000878388	0.012741
Cs9g04050	1.95881	0.246598	0.000881756	0.0127807
Cs1g09580	-2.06271	0.808925	0.000883447	0.0127961
Cs9g05660	-1.21427	1.43872	0.000884914	0.0127991
Cs4g18220	-1.05171	2.24474	0.000886453	0.0128123
Cs3g27060	-6.12896	-1.47291	0.000906914	0.0130616
Cs6g02750	2.94026	-1.10429	0.000909566	0.0130679
Cs8g18290	-1.88434	2.69176	0.000915264	0.0131261
Cs8g10950	-1.05929	3.78934	0.00093949	0.013464
orange1.1t00778	2.68649	-0.258759	0.000941278	0.0134802
Cs5g33680	-1.53367	2.9059	0.000942277	0.013485
orange1.1t00230	1.26249	1.62105	0.000951458	0.0135972
Cs7g05600	-1.01571	2.47341	0.000959909	0.0137064
Cs4g07940	1.26469	4.09795	0.000960447	0.0137064
Cs4g10830	-1.55048	1.04655	0.000979105	0.0139433
Cs1g14240	2.80359	-1.19556	0.000993838	0.0141235
Cs3g03790	-1.23061	1.19195	0.000996312	0.0141373
Cs3g01590	-6.23595	-1.39869	0.000998151	0.0141373
Cs9g06660	-1.32581	2.05637	0.00100473	0.0141979
Cs5g33820	-1.93232	1.16006	0.00100536	0.0141979
Cs5g10320	-1.26735	1.72149	0.0010091	0.0142408
Cs1g08720	-1.35261	1.19229	0.00100995	0.0142429
orange1.1t01290	-3.71725	-1.22847	0.00101099	0.014247
Cs3g21730	-1.01813	3.71685	0.00101696	0.0142725
Cs1g19730	-1.77062	0.848909	0.00102501	0.014336
Cs5g06610	-2.68767	-0.511465	0.00102663	0.0143422
Cs2g29010	2.24042	-0.836519	0.00102686	0.0143422
Cs3g22170	2.47617	-0.415189	0.00102787	0.0143465
Cs9g07650	2.18564	-0.741703	0.00105049	0.0146421
Cs2g24050	-1.97653	0.478283	0.00105265	0.0146622
Cs3g09175	-3.06204	-1.29419	0.00106218	0.0147544
Cs1g25820	-2.2959	-0.789862	0.00107463	0.0149172
Cs4g14590	1.24865	1.29283	0.00107665	0.0149325
orange1.1t03405	-1.15913	1.91924	0.00108216	0.014991
Cs2g19670	-1.10224	2.16721	0.00108336	0.0149974
Cs6g13100	-1.01596	2.55305	0.00109303	0.0150902
Cs2g17970	-2.79311	-0.766214	0.00109713	0.0151058
Cs4g17140	-1.20165	2.91255	0.00110574	0.0151831
Cs8g01840	-2.79076	-0.965082	0.00113645	0.0154795
Cs6g18600	-1.04601	1.90101	0.00113967	0.015513
orange1.1t05024	-2.71246	-1.0196	0.00115849	0.0157033
orange1.1t04969	-1.81261	4.90863	0.0011654	0.0157592
Cs5g13800	-4.0809	-1.5501	0.00116551	0.0157592
Cs2g28870	-6.33467	-1.32827	0.00117128	0.0158056
Cs7g11770	-1.93252	-0.472523	0.0011932	0.0160376
Cs7g05470	-1.37839	1.02738	0.00119837	0.0160964
Cs5g07852	-5.35275	-1.96531	0.001203	0.0161441
Cs5g28840	-2.26073	-0.813525	0.00120958	0.0162042
Cs3g02330	-1.18723	1.14336	0.00121387	0.0162403
Cs6g17950	-1.64454	-0.0202658	0.00121526	0.0162482
Cs5g29920	1.07988	3.08102	0.0012175	0.0162568
Cs3g17890	-1.83112	1.14174	0.00121863	0.016261
Cs7g28920	-1.7827	0.754028	0.00122442	0.0162956
Cs3g27650	-7.90882	-0.0487823	0.00122892	0.0163342
Cs5g29870	-1.52198	4.83436	0.00122979	0.0163351
orange1.1t05257	-2.61809	0.0216935	0.00123135	0.0163451
Cs1g16670	-1.3409	3.12471	0.00124356	0.0164806
Cs4g06950	1.50512	2.75808	0.00124399	0.0164806
Cs1g18220	1.16743	6.15431	0.00124933	0.0165407
Cs8g19110	2.55312	-1.13394	0.00129238	0.016978
Cs8g20570	-1.05989	2.57526	0.00129644	0.0170203
Cs8g21070	-1.35748	1.01379	0.0013011	0.0170595
Cs6g09420	-1.51004	5.19807	0.00131958	0.0172794
Cs6g10250	-1.07913	6.78521	0.0013255	0.0173458
Cs6g12070	-1.17273	1.17383	0.00133367	0.0174303
Cs5g07160	-1.862	4.22786	0.00134574	0.0175654
Cs6g19670	-1.17067	2.0071	0.00138692	0.0180335
Cs4g12020	-1.25075	0.965676	0.00141122	0.0183027
Cs4g10020	2.68499	-1.04703	0.00141356	0.0183213
Cs5g30350	5.53864	-1.86125	0.00141584	0.0183275
Cs3g13670	1.59443	1.14571	0.00142093	0.0183701
orange1.1t05138	4.65315	-1.16397	0.00146219	0.018808
orange1.1t00156	-1.08595	2.32827	0.0014811	0.0190058
orange1.1t04745	-1.62771	0.323115	0.00148143	0.0190058
Cs8g01920	-1.12678	4.67802	0.00148319	0.0190058
Cs5g18620	-1.50446	0.849441	0.00149566	0.0191293
Cs5g15220	-2.06008	-0.294948	0.00149918	0.0191624
Cs2g01990	-3.7978	2.23644	0.00151332	0.0193066
Cs3g19670	-1.11024	2.02065	0.00151614	0.0193306
Cs9g02720	-1.52283	6.04565	0.00153456	0.0195409
Cs1g17550	1.14678	1.86658	0.0015376	0.0195553
Cs5g17950	-5.15264	-2.07615	0.00154169	0.0195788
orange1.1t03083	-5.15264	-2.07615	0.00154203	0.0195788
Cs5g25000	1.06231	2.3114	0.00155071	0.0196481
Cs4g06170	-1.09747	1.25677	0.00156001	0.0197537
Cs7g11950	-1.76554	0.847992	0.00158627	0.0199867
Cs8g06880	1.54601	0.954474	0.0015928	0.0200193
Cs1g14920	1.48179	3.91654	0.0015995	0.0200911
Cs1g13300	-2.6698	-1.04746	0.00161563	0.0202754
Cs1g08190	-1.26102	0.972326	0.00161617	0.0202754
Cs7g20060	-1.27216	1.17972	0.0016281	0.0203873
Cs5g26010	-1.24129	0.755175	0.00163125	0.0204142
orange1.1t04609	1.8239	0.357979	0.00165756	0.0206902
orange1.1t03624	1.76643	-0.343804	0.00165895	0.0206902
Cs6g13910	-1.29731	1.51196	0.00165979	0.0206902
Cs2g22140	-2.96848	-0.838638	0.0016852	0.0209348
orange1.1t03452	1.37431	2.45672	0.0017186	0.0213237
Cs3g18580	-1.85385	0.526864	0.00172444	0.02137
Cs7g07860	-1.18585	4.43091	0.00174149	0.021542
Cs2g20590	1.63378	8.32577	0.00174547	0.0215781
Cs3g12750	1.87428	-0.195583	0.00174697	0.0215834
Cs4g07040	-2.46723	3.25986	0.00174834	0.0215873
orange1.1t05657	1.14077	1.52467	0.00176393	0.0217019
Cs9g03000	-1.28165	1.73114	0.00176403	0.0217019
Cs5g21010	1.57909	1.36308	0.00179677	0.0220647
Cs1g01460	-1.13533	2.68098	0.00179812	0.0220679
Cs5g20040	1.3249	0.881287	0.00179965	0.0220734
Cs8g05940	-1.67291	1.02648	0.00180448	0.0221193
Cs7g28520	-1.12137	1.47366	0.00180744	0.0221289
Cs4g13870	-1.96539	-0.197532	0.00181363	0.0221779
Cs7g29040	-2.09029	2.08102	0.00184213	0.0224859
Cs4g08370	1.96912	-0.764819	0.00185571	0.0226245
Cs5g18510	-1.02822	1.97634	0.00188695	0.0229641
Cs1g12460	-2.06067	0.0861111	0.00190001	0.0231092
Cs5g29680	-1.20491	1.49769	0.00190436	0.0231483
Cs8g17030	1.27019	1.61271	0.00192238	0.0232838
Cs7g22470	-1.48021	0.468747	0.00194527	0.0234632
Cs6g07510	-1.12185	4.95144	0.00195118	0.0235066
Cs9g18780	-1.26471	1.2152	0.00199806	0.0239887
Cs5g32370	1.07882	1.55765	0.00201317	0.024139
Cs7g03460	-1.00501	2.45875	0.00206835	0.0246554
Cs6g09690	-1.37548	0.398126	0.00208359	0.0247992
Cs2g05605	1.0105	3.88107	0.00209424	0.024833
Cs7g12790	-3.51737	-1.3633	0.00210377	0.0249314
Cs1g04650	2.10424	0.749832	0.00211829	0.0250597
Cs5g24930	1.84216	-0.292928	0.0021407	0.025266
Cs3g13720	1.24858	2.09545	0.0021459	0.0253126
Cs1g01500	-1.26571	2.05946	0.00220717	0.0258405
Cs3g08520	-1.0251	3.49013	0.0022174	0.0259305
Cs2g09980	-1.22151	5.22809	0.00222133	0.0259615
orange1.1t00904	-2.11763	-0.0914921	0.00223457	0.0261013
orange1.1t03628	1.54101	0.804546	0.0022622	0.0263257
orange1.1t02924	-1.29806	1.25694	0.00226285	0.0263257
Cs1g22010	-1.23413	1.27345	0.00227373	0.0263919
Cs7g23270	2.52201	-0.963949	0.0022857	0.0264855
Cs5g33380	-1.85562	-0.435443	0.00229262	0.0265505
Cs7g27240	2.86067	-1.43398	0.00229945	0.0266144
Cs3g18450	-1.33584	1.72499	0.00232684	0.0268639
Cs5g03240	-1.42582	2.62141	0.00234394	0.0270065
Cs5g08360	-1.47815	6.32045	0.00236432	0.0272258
Cs7g16520	-1.08931	1.57335	0.00238893	0.0274315
Cs4g09780	1.13316	8.80666	0.00240459	0.0275647
Cs6g15350	-1.80986	0.581757	0.00242214	0.0277502
Cs3g15710	-1.15713	1.55931	0.00242468	0.0277637
Cs2g06700	2.45832	-1.19563	0.0024613	0.0281039
Cs6g18320	-1.21214	0.84171	0.00248374	0.0282526
Cs1g20030	-2.47929	1.4977	0.00249791	0.0283943
Cs4g15210	1.5122	0.481114	0.0025143	0.0285533
Cs6g20930	-2.44292	-0.838023	0.0025305	0.0287006
Cs9g19400	1.86179	-0.529101	0.00253753	0.0287067
Cs5g24240	-1.17726	2.3279	0.00254238	0.0287392
Cs3g07240	-1.10238	1.50764	0.00254988	0.028792
Cs4g02450	-1.01842	7.75795	0.00256248	0.0289022
Cs4g13010	-5.44156	-1.91313	0.00258993	0.0291594
Cs6g08360	-1.46201	4.3993	0.00259263	0.0291614
Cs2g26210	-1.34094	0.5176	0.00261144	0.0293026
Cs2g17370	-2.49082	0.970132	0.00262034	0.0293755
orange1.1t05015	-3.11486	-1.26082	0.00263543	0.029491
Cs5g12880	1.20227	1.99605	0.00264151	0.0295315
Cs2g08650	1.00402	3.22105	0.0026604	0.0297197
Cs1g05840	1.88207	-0.610749	0.00269614	0.0300267
Cs5g06550	-1.08644	1.61405	0.00274123	0.0304455
Cs5g31400	1.31135	0.820498	0.00274435	0.0304635
Cs8g09090	1.0091	6.60022	0.00275557	0.0305547
Cs1g22360	-1.01114	1.53671	0.00276158	0.0306046
orange1.1t00405	-1.06412	4.96826	0.0027639	0.0306137
Cs5g02450	-1.25228	2.72054	0.00276805	0.0306262
Cs3g23200	-1.2949	1.49253	0.00277072	0.0306391
Cs4g03720	-1.75096	0.498002	0.00277263	0.0306436
Cs7g10560	-1.23941	0.610317	0.00279826	0.0307964
Cs9g03360	-3.73371	-1.76592	0.00281916	0.0309741
orange1.1t03231	-3.73371	-1.76592	0.00282152	0.0309819
Cs8g04660	-2.21176	-0.992464	0.00283578	0.0311217
Cs6g09525	-2.39154	-1.22829	0.00283908	0.031141
Cs7g05920	-1.10388	2.46284	0.00284518	0.0311501
Cs5g10480	-5.60792	-1.81363	0.00285154	0.0311937
orange1.1t04673	-1.87858	-0.813507	0.00288356	0.0314282
Cs2g01150	-2.83609	0.196145	0.0028838	0.0314282
Cs3g20065	-2.91261	-0.677104	0.00289463	0.0315293
Cs7g01980	-3.06154	-1.2944	0.00291171	0.0316814
orange1.1t05781	-1.88318	0.0869014	0.00293587	0.0318575
Cs5g33920	-2.0707	-0.938683	0.00294588	0.0319166
Cs5g26140	-5.59303	-0.415354	0.00296446	0.0320325
orange1.1t03155	-1.76787	6.2369	0.00302244	0.0325616
Cs3g17390	-1.06181	7.93723	0.00302303	0.0325616
Cs9g16990	1.22378	0.707612	0.00304383	0.0327336
Cs8g01820	-5.60947	-1.81342	0.00305556	0.0328424
Cs7g02120	-2.06914	-0.939085	0.00310971	0.0333364
Cs1g13590	-2.4925	-1.16551	0.00314859	0.0336644
Cs8g13800	-1.6334	0.535711	0.00315444	0.0336915
Cs2g22220	-1.35882	1.33873	0.00319698	0.0340824
Cs1g23770	-1.49676	0.517199	0.00319774	0.0340824
Cs3g23910	-2.58213	-1.32807	0.00322661	0.0343405
Cs1g20510	1.29855	1.93297	0.00323837	0.0344253
Cs3g23890	1.27849	1.57141	0.00324173	0.0344299
Cs9g16160	-1.00584	5.49869	0.00329141	0.0348456
orange1.1t05293	5.16168	-2.0754	0.00332451	0.0351024
Cs6g14040	1.67601	0.347935	0.00333942	0.0352233
Cs9g06970	1.24286	0.602902	0.00335546	0.0353741
Cs6g03340	1.31294	1.68626	0.00337792	0.0355188
Cs2g10310	2.28892	-0.433727	0.00339681	0.0356621
Cs3g12760	-1.2289	1.8928	0.0034059	0.0357157
Cs7g16950	2.18584	-1.01862	0.00342267	0.0358411
Cs1g07380	-1.46851	1.22806	0.00344904	0.03608
Cs2g28430	-1.39475	0.210034	0.00349329	0.0364867
Cs9g14750	1.58553	0.866786	0.00349909	0.0365285
Cs9g14500	2.85902	-1.43376	0.00351259	0.0365771
orange1.1t05981	-5.52794	-1.8624	0.00351363	0.0365771
Cs2g01860	-2.06242	-0.294254	0.00351454	0.0365771
Cs7g31260	1.74989	-0.696741	0.00353748	0.036729
Cs6g16130	-1.2553	0.818545	0.0035686	0.0370072
Cs5g27290	-1.31969	2.25632	0.00357138	0.0370171
Cs2g17130	-1.11089	1.40318	0.00357913	0.0370557
Cs9g16460	-1.95752	-0.550851	0.00358057	0.0370557
orange1.1t04726	-1.01905	2.07285	0.00360626	0.0372268
Cs3g13820	-1.05589	1.35073	0.00361333	0.037262
Cs5g05180	-1.2661	1.81723	0.00365745	0.0376406
Cs3g07780	-3.47528	-1.91276	0.00367309	0.0377634
Cs7g27980	-1.24095	1.2957	0.0036758	0.0377677
Cs1g20820	1.59017	3.92166	0.00374238	0.0382822
orange1.1t02946	1.34038	1.63065	0.00375322	0.0383424
Cs5g34390	-1.12574	1.16211	0.00377125	0.0384747
Cs7g31975	1.38333	1.6906	0.00377592	0.0384747
orange1.1t02846	-2.72686	-0.813242	0.0038009	0.0386283
Cs7g23655	-1.89914	-0.590932	0.00383154	0.0388772
Cs3g06600	-1.7856	-0.570543	0.00383305	0.0388772
orange1.1t00536	1.18067	1.00237	0.00384696	0.0389989
Cs6g13770	-3.15872	-1.22906	0.00385583	0.0390498
Cs8g02380	-1.17169	1.81803	0.0038604	0.0390767
Cs3g07570	-2.29154	2.07941	0.0038645	0.0390882
Cs1g14210	-2.94373	-1.72023	0.0038673	0.0390882
orange1.1t02458	-1.73259	-0.697979	0.00388863	0.0392258
Cs5g20010	1.05822	1.72028	0.00391579	0.0394215
Cs5g22400	-1.27015	0.537079	0.00393313	0.0395377
orange1.1t02346	-2.7222	-1.51046	0.00393317	0.0395377
orange1.1t02418	1.1177	2.94211	0.00393585	0.0395452
Cs4g11610	-1.65772	0.38744	0.00402356	0.0402673
Cs6g11700	1.43053	0.69892	0.00403174	0.0403187
Cs7g19830	1.82373	4.80692	0.00403464	0.0403187
Cs6g07430	-1.02101	1.70502	0.00408196	0.0407515
Cs5g33440	1.01955	1.61678	0.00412446	0.0410961
orange1.1t03874	-1.02491	3.32881	0.00412456	0.0410961
orange1.1t00255	-5.15034	-2.07645	0.00415444	0.0413128
Cs3g24580	-1.00232	1.60076	0.00424252	0.0420653
Cs5g17380	3.47958	-1.39716	0.00430667	0.0425354
Cs6g21230	-1.63788	0.688007	0.00432548	0.0426831
Cs6g14820	3.49007	-1.91205	0.0043654	0.0429956
Cs4g18280	-1.63103	5.2296	0.00439248	0.0432151
Cs2g04090	-1.16157	1.26255	0.00439831	0.0432515
orange1.1t01705	-3.51997	2.45875	0.00448835	0.0439457
orange1.1t01589	-2.04894	1.05998	0.00452407	0.0442528
Cs3g26690	-1.4334	0.645013	0.00452767	0.0442666
Cs3g18110	-1.37676	0.574024	0.00464864	0.0451887
Cs7g19640	2.9584	-1.71943	0.00467495	0.0454011
Cs3g03680	-1.48237	0.0342141	0.00468178	0.0454206
Cs6g15150	1.30763	5.07858	0.00469227	0.0454824
Cs2g18020	1.19166	0.74086	0.00470525	0.0454998
orange1.1t05430	-2.78626	-1.47199	0.00472023	0.0456229
orange1.1t04911	-2.03343	-1.10557	0.00474147	0.0457846
Cs7g18230	-1.24933	0.7052	0.00477159	0.0459356
Cs8g10300	2.48684	-1.39725	0.00477307	0.0459356
Cs4g17570	1.20866	3.55535	0.00477597	0.0459356
Cs5g18370	-2.94449	-1.72008	0.00478194	0.0459356
Cs1g13350	-1.34463	-0.00613737	0.00480958	0.0461357
Cs6g03830	1.16869	1.18229	0.00481475	0.0461634
Cs5g28080	-2.72175	-1.51042	0.00482061	0.0461979
Cs9g06650	-1.46454	0.2565	0.00482624	0.0462083
Cs9g14510	-1.39372	1.52741	0.00493337	0.047101
Cs3g02920	-1.52898	0.256528	0.0049745	0.0474268
Cs4g14060	-1.7329	-0.698136	0.00501508	0.0477218
Cs5g03340	-1.23005	2.20343	0.00504729	0.0479634
Cs2g01460	-1.84808	-0.277981	0.0050779	0.0481701
Cs5g03420	-1.17067	7.15552	0.00508878	0.0482449
Cs7g30690	-1.20733	0.863791	0.00509633	0.048294
Cs7g22860	-1.0444	1.61434	0.00511293	0.0483434
Cs8g17810	-1.54189	3.96303	0.00513988	0.0484915
Cs6g14280	-1.68272	-0.550137	0.00517477	0.0486969
orange1.1t02755	1.87533	1.40108	0.00520198	0.0489078
Cs7g27350	1.6092	1.25301	0.00521332	0.0489917
Cs1g21720	1.52728	-0.227021	0.00522296	0.0490596
Cs7g10740	-1.06849	2.33416	0.00528529	0.0495307
Cs8g05250	-1.13205	2.05608	0.00529748	0.0496086
Cs2g17810	-1.24686	2.81852	0.00533456	0.0497631

## Sheet: 250 WTvsMT
Gene_ID	logFC	logCPM	PValue	FDR
Cs5g25950	5.2428	4.8147	3.80596e-65	7.83876e-61
Cs1g02750	3.11621	6.13763	2.01592e-40	2.076e-36
orange1.1t04376	2.93311	11.2676	4.26567e-39	2.92852e-35
Cs2g03270	4.24897	7.70795	1.27004e-37	6.53943e-34
Cs7g27010	3.15117	5.59184	3.13235e-35	1.29028e-31
Cs9g15430	4.93593	6.55	1.56781e-34	4.86914e-31
Cs7g24940	3.39014	7.9565	1.65488e-34	4.86914e-31
Cs2g28370	4.11029	6.34421	2.58504e-27	6.65519e-24
Cs5g19060	2.27865	7.52362	2.94689e-27	6.7438e-24
Cs3g16430	2.62291	4.81325	3.30043e-27	6.79756e-24
Cs8g14120	2.5873	7.77725	1.52914e-26	2.72217e-23
Cs5g01020	-3.29488	4.17126	1.58604e-26	2.72217e-23
Cs4g03140	-2.86446	4.20778	3.79907e-26	6.01889e-23
Cs3g25140	5.16922	3.73041	5.48387e-26	8.06755e-23
Cs2g21470	-2.96153	4.75838	1.40654e-25	1.93127e-22
Cs5g25900	2.62565	4.93673	1.61392e-25	2.03582e-22
Cs2g07240	2.51003	8.33108	1.68037e-25	2.03582e-22
orange1.1t05092	2.59193	4.69965	5.9134e-25	6.76625e-22
Cs9g06490	5.70636	4.10474	7.84845e-25	8.50772e-22
Cs8g11330	2.53629	8.66264	1.46735e-22	1.51108e-19
Cs9g08100	-2.47499	6.37893	1.05241e-21	1.03217e-18
Cs5g12900	2.04788	7.85491	2.4052e-20	2.2517e-17
Cs5g16850	3.14797	7.06872	4.63189e-20	4.14776e-17
Cs6g18700	3.04274	4.38925	5.75614e-20	4.93972e-17
orange1.1t03042	3.05433	4.59251	1.36317e-19	1.12303e-16
Cs6g21840	3.3167	3.73357	2.37266e-19	1.87951e-16
Cs9g02570	2.51047	4.88414	2.71603e-18	2.07183e-15
Cs2g10720	3.4242	3.77695	4.25598e-18	3.13058e-15
Cs3g15530	2.39839	4.50118	4.49215e-18	3.19035e-15
Cs7g12870	-2.27039	6.90454	5.51003e-18	3.78282e-15
Cs1g24440	3.35131	9.73903	1.09148e-17	7.25165e-15
Cs2g21000	1.85552	8.64674	1.87335e-17	1.20574e-14
Cs7g14940	3.32329	4.76471	2.66241e-17	1.66167e-14
Cs9g16870	-3.41885	3.28689	3.71357e-17	2.24955e-14
Cs8g19720	2.56451	4.72717	6.8641e-17	4.03923e-14
Cs5g25930	1.96058	5.59973	1.84303e-16	1.05442e-13
Cs3g06820	2.65473	3.67028	3.01296e-16	1.63591e-13
Cs3g19990	2.12933	5.14157	3.01828e-16	1.63591e-13
Cs5g10090	-2.44493	6.50511	4.40127e-16	2.32432e-13
Cs7g09040	-1.85026	6.04751	6.31569e-16	3.25195e-13
Cs2g07170	3.27676	5.71903	8.26483e-16	4.15177e-13
Cs4g18280	-3.50852	6.5176	9.8759e-16	4.84295e-13
orange1.1t03769	6.45359	1.53469	1.11627e-15	5.34669e-13
Cs3g03960	-4.2488	3.80176	2.09674e-15	9.81464e-13
Cs5g11280	-2.98273	3.90295	2.49778e-15	1.14321e-12
Cs9g14480	3.80299	5.14434	2.74491e-15	1.20845e-12
Cs2g21220	-2.10598	7.8865	2.75768e-15	1.20845e-12
Cs6g12880	1.85338	9.23185	3.98627e-15	1.71044e-12
Cs6g07690	2.13475	7.19314	5.4032e-15	2.27111e-12
Cs5g25690	-3.35567	2.59802	5.51864e-15	2.27324e-12
Cs5g08360	-3.26577	5.16809	5.80928e-15	2.34604e-12
Cs7g13200	-3.11168	6.8733	6.07991e-15	2.40811e-12
Cs5g25740	2.32758	5.93687	8.31402e-15	3.23086e-12
Cs6g05280	1.64145	5.41737	1.56113e-14	5.95427e-12
Cs7g13290	-3.72124	4.42572	2.17612e-14	8.14899e-12
Cs1g06240	2.51646	5.75058	2.26976e-14	8.27954e-12
Cs5g15530	-2.07137	4.19601	2.29139e-14	8.27954e-12
orange1.1t01192	2.69206	4.82545	3.0424e-14	1.08037e-11
Cs2g23870	2.50979	4.04135	3.82259e-14	1.33441e-11
Cs3g14610	1.6645	5.85616	3.88996e-14	1.33529e-11
Cs8g19450	2.2148	3.84218	4.05397e-14	1.36878e-11
Cs9g07230	-2.96049	5.29796	4.94788e-14	1.641e-11
Cs1g22350	-3.54606	2.25049	5.01955e-14	1.641e-11
Cs4g08750	-2.03671	5.58568	5.50119e-14	1.77035e-11
Cs2g12530	-2.27422	3.79162	5.93647e-14	1.88104e-11
orange1.1t01705	-5.05763	1.13574	7.31178e-14	2.28172e-11
orange1.1t02547	2.30221	4.80855	8.88894e-14	2.73249e-11
Cs9g06230	-4.50894	4.26322	1.01646e-13	3.07868e-11
Cs1g03290	-3.19508	2.75475	1.21203e-13	3.61782e-11
orange1.1t03155	-2.81171	5.1366	1.54395e-13	4.54275e-11
Cs1g22410	-3.01357	3.15099	1.72216e-13	4.99571e-11
Cs7g31410	2.70873	2.8119	2.02668e-13	5.73277e-11
Cs6g01980	1.63283	7.66406	2.03191e-13	5.73277e-11
Cs7g12100	-3.29834	5.62893	2.09941e-13	5.84318e-11
Cs2g07660	-3.00707	5.02183	2.17924e-13	5.9845e-11
Cs6g12430	-4.43401	1.58489	3.17803e-13	8.61247e-11
Cs1g25280	-1.66169	5.08506	3.43197e-13	9.17986e-11
orange1.1t01599	-2.19165	3.95459	3.57479e-13	9.43929e-11
Cs4g10710	2.15352	3.85231	3.83046e-13	9.98636e-11
Cs7g12440	2.11146	5.17237	4.96805e-13	1.27902e-10
Cs1g23370	3.8884	2.52739	5.42962e-13	1.3806e-10
Cs2g19230	-1.75089	5.26575	1.04047e-12	2.61335e-10
Cs6g05260	4.57661	2.6359	1.11267e-12	2.76103e-10
Cs8g16290	1.92856	8.38629	1.17058e-12	2.87014e-10
Cs7g02540	2.35926	5.35663	1.34296e-12	3.25407e-10
Cs6g15210	-2.27257	5.31633	1.54546e-12	3.70119e-10
Cs5g33420	-2.93671	3.97381	1.60859e-12	3.8081e-10
orange1.1t03382	1.75763	4.92426	1.73499e-12	4.06067e-10
Cs9g12380	-1.67736	7.77808	1.86761e-12	4.32195e-10
Cs5g32270	-2.91986	3.26867	1.98225e-12	4.53628e-10
orange1.1t03119	1.68867	6.35807	2.27394e-12	5.14661e-10
Cs5g27580	1.81441	6.85595	2.36602e-12	5.29679e-10
Cs8g09720	1.48623	8.55137	2.46022e-12	5.44846e-10
Cs3g15460	-1.59333	6.1526	2.88012e-12	6.31054e-10
Cs2g11750	1.90376	6.68892	4.0566e-12	8.79472e-10
Cs3g23440	2.28803	6.88264	4.61786e-12	9.90724e-10
orange1.1t02046	-3.26038	1.80169	6.5062e-12	1.38146e-09
Cs5g09360	1.61056	4.53975	8.54796e-12	1.79647e-09
Cs2g28360	-1.66749	6.36656	9.08825e-12	1.89072e-09
Cs3g09160	-6.15917	0.0835289	1.02782e-11	2.1169e-09
Cs4g15710	2.42517	4.23092	1.06305e-11	2.16779e-09
Cs5g22080	1.8351	4.63749	1.14862e-11	2.3193e-09
Cs9g16640	1.76719	9.80698	1.20671e-11	2.41294e-09
Cs1g04680	-6.40049	0.298205	1.25506e-11	2.48551e-09
Cs2g30480	2.26896	4.91031	1.34119e-11	2.63079e-09
Cs9g08760	-2.31702	6.07717	1.54555e-11	3.00303e-09
Cs8g19460	1.45062	6.07418	1.76735e-11	3.40191e-09
Cs6g11570	-4.0128	5.20404	1.925e-11	3.67105e-09
orange1.1t04803	-2.72228	4.31859	2.20029e-11	4.13283e-09
Cs8g20760	-1.56601	5.74826	2.20728e-11	4.13283e-09
Cs9g04030	-2.60892	5.49606	2.27221e-11	4.21608e-09
Cs2g30590	-1.53265	6.52711	2.68268e-11	4.93325e-09
Cs5g09370	1.5364	5.05457	2.74225e-11	4.99817e-09
Cs7g20700	-4.91767	1.00568	2.82792e-11	5.10911e-09
Cs8g18710	-2.69498	6.27136	3.10591e-11	5.56255e-09
Cs2g31410	2.99437	2.21493	3.56697e-11	6.33322e-09
orange1.1t02409	1.62507	8.67817	3.75779e-11	6.56571e-09
Cs5g12420	-6.13223	0.0581478	3.76167e-11	6.56571e-09
Cs5g19590	-5.6125	0.780877	3.95728e-11	6.84909e-09
Cs5g14480	-3.16697	1.58735	5.22323e-11	8.96481e-09
Cs1g06910	-1.66943	6.73368	5.28242e-11	8.99147e-09
Cs4g02670	2.84517	4.71631	5.81467e-11	9.8163e-09
Cs7g27685	2.7122	2.70714	6.03663e-11	1.01082e-08
Cs9g06010	4.2143	2.8245	6.42186e-11	1.06665e-08
Cs7g01530	-2.77059	5.86471	7.07011e-11	1.16493e-08
Cs1g04650	-2.62244	5.28682	7.17455e-11	1.17275e-08
Cs2g04110	8.42079	0.398327	7.25586e-11	1.17671e-08
Cs9g16880	-1.71893	5.14251	8.01164e-11	1.28912e-08
Cs3g18070	-1.4987	7.81146	8.92247e-11	1.42455e-08
Cs8g19110	-2.55732	6.05162	9.2599e-11	1.46705e-08
Cs5g33200	2.38104	2.56506	1.02204e-10	1.60686e-08
Cs1g16820	-1.35586	5.42116	1.04242e-10	1.62649e-08
Cs5g09130	1.40598	6.54922	1.07373e-10	1.66275e-08
Cs2g21240	1.56072	4.47006	1.23059e-10	1.89143e-08
orange1.1t01815	-1.82781	5.72387	1.40838e-10	2.14867e-08
Cs7g07120	3.28511	3.08603	1.49151e-10	2.25876e-08
Cs6g18900	1.30938	8.14789	1.68636e-10	2.53521e-08
Cs5g10040	-1.32538	6.98121	1.76273e-10	2.63082e-08
Cs6g07970	1.4461	9.65214	2.06937e-10	3.06624e-08
Cs6g17510	-1.42951	5.987	2.17547e-10	3.20043e-08
Cs3g03130	-2.68139	6.50854	2.36887e-10	3.46023e-08
Cs3g15540	1.35873	9.49954	2.38755e-10	3.46295e-08
Cs4g11690	-2.17518	3.57512	2.41351e-10	3.47613e-08
Cs2g29780	2.82238	3.54719	2.50564e-10	3.58375e-08
Cs1g03960	-3.26285	5.47394	2.59822e-10	3.69054e-08
orange1.1t01844	-1.63043	4.56617	2.69578e-10	3.8029e-08
Cs5g08910	-2.67627	2.34315	2.74204e-10	3.84185e-08
Cs5g04580	-1.7747	5.23407	2.76785e-10	3.85181e-08
orange1.1t01707	-1.60036	6.81781	2.97141e-10	4.10733e-08
Cs1g12880	1.2926	6.13718	3.32629e-10	4.56193e-08
Cs2g15270	-3.89753	3.41511	3.34459e-10	4.56193e-08
Cs5g25920	2.09197	4.02866	4.07147e-10	5.51685e-08
Cs8g15240	-1.7233	4.99258	4.19413e-10	5.6459e-08
Cs6g13560	-2.6718	3.43232	4.34823e-10	5.81534e-08
Cs3g23120	-1.3747	5.25328	4.488e-10	5.96353e-08
Cs7g30090	1.31585	6.71482	5.42973e-10	7.16864e-08
orange1.1t01595	-6.32671	2.09613	5.57775e-10	7.31716e-08
Cs2g05350	1.34514	7.79966	5.67839e-10	7.40203e-08
Cs5g04770	-1.4221	6.24089	5.9104e-10	7.65601e-08
Cs5g01440	2.63728	2.87523	6.03103e-10	7.76344e-08
Cs7g06030	-1.90653	5.57355	6.73091e-10	8.61054e-08
Cs3g22910	-3.78636	6.52955	6.80239e-10	8.64828e-08
Cs3g19420	-1.66178	4.60008	7.03102e-10	8.8841e-08
Cs4g15735	-2.37372	7.50983	7.26887e-10	9.12864e-08
Cs2g30580	-2.05761	3.22327	7.43116e-10	9.27589e-08
Cs2g17350	1.34034	8.67954	7.96987e-10	9.8884e-08
orange1.1t04700	5.62726	1.1111	8.04809e-10	9.92566e-08
Cs7g29980	-2.21365	4.286	8.66381e-10	1.06214e-07
Cs3g11590	-2.3299	5.18233	8.81835e-10	1.07469e-07
Cs9g12450	-2.18644	6.05697	9.55522e-10	1.15764e-07
Cs2g09840	1.35488	5.69535	9.84695e-10	1.18601e-07
Cs1g25530	-2.26984	5.66376	1.09004e-09	1.30526e-07
Cs1g21585	-1.83035	4.09406	1.10565e-09	1.3163e-07
Cs4g08470	1.51547	6.83577	1.14795e-09	1.3588e-07
orange1.1t03040	1.77523	4.93252	1.33617e-09	1.57256e-07
Cs7g11415	7.48292	-0.436206	1.41831e-09	1.65782e-07
Cs2g01840	1.59764	6.31804	1.42471e-09	1.65782e-07
orange1.1t01385	-1.50088	5.99744	1.47478e-09	1.70644e-07
Cs7g02240	1.24795	8.92202	1.59599e-09	1.83637e-07
orange1.1t02754	1.26943	8.85386	1.61712e-09	1.85035e-07
Cs5g32150	-2.39105	2.79381	1.68434e-09	1.91661e-07
Cs7g32220	1.3235	10.4229	1.882e-09	2.12976e-07
Cs1g03280	-1.51504	6.27733	1.93484e-09	2.17759e-07
Cs5g02480	1.78653	3.73666	2.44255e-09	2.7319e-07
Cs2g28800	2.28227	4.26676	2.45388e-09	2.7319e-07
Cs5g07856	-7.31448	-0.564097	2.51205e-09	2.78163e-07
Cs1g20120	1.95683	4.29695	2.60871e-09	2.87321e-07
Cs2g04080	1.37573	4.97256	2.82308e-09	3.09278e-07
Cs1g10500	-1.46963	4.66484	3.02287e-09	3.29413e-07
Cs1g20800	1.28621	9.15632	3.11269e-09	3.37415e-07
Cs3g11790	1.66091	4.7671	3.32007e-09	3.58011e-07
Cs5g27740	-2.23408	5.02096	3.3499e-09	3.59346e-07
Cs7g28340	-1.61649	5.24283	3.42175e-09	3.63936e-07
Cs8g20310	1.42477	5.8679	3.42803e-09	3.63936e-07
Cs1g23720	-2.03523	3.36324	4.06198e-09	4.29029e-07
Cs9g10630	1.5286	6.58458	4.50604e-09	4.73502e-07
Cs3g26240	-3.13107	7.47328	4.59974e-09	4.80894e-07
Cs8g09090	-2.16647	7.89903	4.93919e-09	5.13484e-07
Cs9g16450	-1.32998	5.62609	4.96132e-09	5.13484e-07
Cs3g09120	-2.70672	5.90804	5.11932e-09	5.27188e-07
Cs8g02940	1.81707	3.86495	5.63219e-09	5.74506e-07
Cs9g17270	1.2999	6.66642	5.6346e-09	5.74506e-07
Cs7g08730	-2.17993	3.52461	5.9615e-09	6.04843e-07
Cs5g02430	-4.8111	1.11018	6.10064e-09	6.15925e-07
Cs2g07460	-2.13057	7.7325	6.43835e-09	6.4685e-07
Cs7g17560	1.21242	6.02334	6.49474e-09	6.49348e-07
Cs9g18750	4.96019	-0.294896	6.63798e-09	6.60463e-07
Cs8g15600	4.26923	0.390082	7.34138e-09	7.26938e-07
Cs6g08970	1.55111	3.83173	7.85408e-09	7.73522e-07
Cs5g05900	2.00965	2.9129	7.88695e-09	7.73522e-07
Cs6g15300	-1.54842	10.1208	8.08084e-09	7.88782e-07
Cs8g05410	1.27706	9.18546	8.19207e-09	7.95868e-07
Cs3g17520	1.3285	6.75082	8.59834e-09	8.31415e-07
Cs7g10720	-1.65894	4.65917	8.70055e-09	8.37367e-07
Cs5g12880	2.86006	2.22847	8.96969e-09	8.59255e-07
Cs4g06620	1.27427	6.96741	9.1996e-09	8.77199e-07
Cs7g09170	1.25754	6.48967	9.76565e-09	9.26882e-07
orange1.1t00521	-2.12266	3.28309	1.14835e-08	1.08493e-06
orange1.1t01622	-1.76689	10.2118	1.22433e-08	1.15143e-06
Cs5g08000	-1.47416	4.36887	1.27828e-08	1.1967e-06
Cs4g16180	-2.69008	6.69489	1.2905e-08	1.20022e-06
Cs5g19400	-1.53115	4.8882	1.29369e-08	1.20022e-06
Cs3g01585	3.73792	8.85957	1.31238e-08	1.2121e-06
Cs7g29760	-3.57296	6.84907	1.37374e-08	1.2631e-06
Cs3g27360	1.24453	4.82836	1.40815e-08	1.28899e-06
Cs9g15150	4.17484	0.668138	1.4549e-08	1.32589e-06
Cs3g23040	-1.58583	4.91486	1.48957e-08	1.3515e-06
Cs1g18460	1.48476	7.58609	1.53763e-08	1.38899e-06
Cs8g12020	-3.29461	2.63711	1.57115e-08	1.41307e-06
Cs2g25450	2.32603	4.34919	1.63709e-08	1.46598e-06
Cs4g03060	-2.58558	2.9519	1.66574e-08	1.48517e-06
Cs9g07560	-1.43176	6.03548	1.85248e-08	1.64455e-06
orange1.1t05091	2.20124	2.4725	1.96338e-08	1.73553e-06
Cs1g05770	1.80752	6.77911	1.98199e-08	1.74128e-06
Cs4g18090	2.26203	8.20499	1.9868e-08	1.74128e-06
Cs2g04980	-3.08343	4.68943	1.99789e-08	1.74358e-06
Cs1g22500	-1.58959	5.96099	2.12729e-08	1.84868e-06
Cs5g25760	2.53978	4.88777	2.20645e-08	1.90941e-06
Cs4g05760	-2.4474	5.79083	2.23783e-08	1.92309e-06
Cs9g09640	-1.51434	5.93312	2.24093e-08	1.92309e-06
orange1.1t02977	2.54823	4.54342	2.28063e-08	1.94904e-06
Cs6g08710	1.23341	5.13706	2.38887e-08	2.02589e-06
Cs2g05170	-2.45258	6.26886	2.39023e-08	2.02589e-06
Cs2g08650	1.89194	3.28936	2.4933e-08	2.10459e-06
Cs1g11780	1.30673	5.69573	2.62662e-08	2.20808e-06
Cs5g10280	-2.02096	4.63634	2.83648e-08	2.3748e-06
Cs5g06600	1.20666	9.26414	2.94773e-08	2.45795e-06
Cs5g05300	-2.25897	6.09591	3.06646e-08	2.54665e-06
Cs1g07380	-2.87217	3.34273	3.27395e-08	2.70804e-06
Cs7g32210	1.31627	6.77335	3.31563e-08	2.73155e-06
Cs6g18540	-3.85796	3.22086	3.37392e-08	2.76849e-06
Cs2g18070	-3.28369	2.18666	3.44264e-08	2.81368e-06
Cs4g07340	-3.14765	1.81994	3.53156e-08	2.87229e-06
Cs3g17330	-1.75104	5.24416	3.54979e-08	2.87229e-06
Cs8g02780	-1.44733	6.45886	3.5562e-08	2.87229e-06
Cs8g04550	-3.28143	3.11148	3.63668e-08	2.92582e-06
Cs3g04540	3.00929	2.25157	3.80131e-08	3.04637e-06
Cs3g09710	-2.95845	1.90483	3.87814e-08	3.0959e-06
Cs7g09470	-3.01606	1.2611	3.91512e-08	3.11335e-06
Cs6g21140	-1.83801	4.03674	4.02751e-08	3.18806e-06
Cs5g15350	-1.821	3.793	4.04003e-08	3.18806e-06
Cs8g17960	-1.67477	5.67342	4.10282e-08	3.22525e-06
Cs8g12640	1.19464	8.68242	4.11936e-08	3.22595e-06
Cs6g21420	-2.1438	6.83284	4.19399e-08	3.27195e-06
Cs1g01540	1.2519	8.47666	4.2528e-08	3.30531e-06
Cs7g27350	3.32657	1.54558	4.42278e-08	3.42449e-06
Cs2g12850	-2.17286	6.7015	4.51736e-08	3.48463e-06
Cs1g05970	-1.91035	5.4732	4.54527e-08	3.49308e-06
orange1.1t01353	-1.55032	5.23643	4.96124e-08	3.79858e-06
Cs5g10170	-5.15188	0.365115	5.01181e-08	3.82309e-06
Cs5g22260	-4.09696	1.27956	5.04515e-08	3.83432e-06
Cs1g14580	-2.84008	5.01465	5.29018e-08	4.00576e-06
orange1.1t01365	-2.97093	2.5722	5.36244e-08	4.03206e-06
orange1.1t00313	-3.65631	5.08517	5.36407e-08	4.03206e-06
Cs2g04370	-1.25944	4.52549	5.9778e-08	4.47704e-06
Cs3g09280	-2.19422	6.44602	6.34654e-08	4.73599e-06
Cs3g16610	-1.63598	6.80163	6.45909e-08	4.79292e-06
Cs2g14860	-1.90898	6.85516	6.47184e-08	4.79292e-06
Cs2g03520	-2.86832	4.45456	6.49264e-08	4.79292e-06
Cs6g04120	-1.12999	5.71444	6.64818e-08	4.89021e-06
Cs2g07420	-1.85158	4.00355	7.06198e-08	5.16741e-06
orange1.1t03798	-3.07932	1.02718	7.0752e-08	5.16741e-06
Cs3g27650	-10.1522	2.05168	7.11694e-08	5.17952e-06
Cs8g09160	1.15059	7.08261	7.14966e-08	5.18501e-06
Cs5g21250	2.09498	2.68929	8.21525e-08	5.93689e-06
Cs4g01020	-3.04318	2.77089	8.29362e-08	5.97257e-06
orange1.1t00748	-1.31169	7.90104	9.53209e-08	6.84052e-06
Cs7g09640	-1.89464	7.87951	9.6207e-08	6.88014e-06
Cs6g18910	1.14394	5.52734	9.75016e-08	6.94859e-06
orange1.1t00956	-1.4005	8.68026	9.81525e-08	6.97086e-06
Cs2g13790	-1.54059	6.76783	1.01975e-07	7.2164e-06
orange1.1t04573	-1.64538	3.70309	1.02311e-07	7.2164e-06
Cs2g26590	-2.48886	2.41022	1.07955e-07	7.58854e-06
orange1.1t05138	-8.13421	0.152372	1.111e-07	7.78301e-06
orange1.1t04991	-3.65142	1.38985	1.14391e-07	7.9864e-06
Cs4g10580	-1.45349	4.28171	1.15577e-07	8.04196e-06
Cs8g08420	-1.66122	4.44188	1.16844e-07	8.10274e-06
Cs2g10480	-3.59717	0.494595	1.17684e-07	8.13365e-06
Cs6g19180	-2.02343	6.54419	1.26044e-07	8.6823e-06
Cs7g22990	-2.47027	1.91094	1.39023e-07	9.54436e-06
Cs2g06800	-1.32019	7.41609	1.40724e-07	9.62907e-06
Cs6g09960	1.70406	10.7641	1.41304e-07	9.63672e-06
Cs5g14160	-4.81232	-0.378004	1.44461e-07	9.81957e-06
Cs5g30640	-1.48524	7.91216	1.59738e-07	1.08222e-05
Cs4g15890	1.13829	8.43969	1.60369e-07	1.08294e-05
Cs3g18080	-1.57439	3.76895	1.64879e-07	1.10827e-05
orange1.1t03307	-2.82266	1.58259	1.65197e-07	1.10827e-05
Cs7g21940	-1.12092	5.17978	1.67945e-07	1.12193e-05
orange1.1t06010	1.97196	2.67796	1.68322e-07	1.12193e-05
Cs6g09160	1.59052	6.45542	1.71803e-07	1.13793e-05
Cs1g19190	-2.41949	2.3698	1.71828e-07	1.13793e-05
Cs3g18090	-3.30681	5.89228	1.73121e-07	1.14282e-05
Cs2g05180	-5.52047	-0.467831	1.75907e-07	1.1575e-05
Cs9g16350	-7.04936	-0.780798	1.87146e-07	1.22753e-05
Cs8g18020	1.44174	4.30224	1.97244e-07	1.28967e-05
Cs8g08820	-3.89351	2.04282	1.9861e-07	1.29449e-05
Cs4g02590	1.58513	6.2762	2.0247e-07	1.31548e-05
Cs9g14380	-9.71839	1.6292	2.07146e-07	1.34163e-05
Cs5g21190	1.9153	3.50088	2.10642e-07	1.35999e-05
Cs6g21560	-1.78409	2.82483	2.12975e-07	1.37076e-05
Cs5g01750	-1.4697	7.34109	2.15556e-07	1.38305e-05
Cs1g01800	-2.40621	6.7798	2.16559e-07	1.38517e-05
Cs2g15230	1.19122	4.9127	2.21461e-07	1.41214e-05
Cs1g13850	1.0651	7.4527	2.25729e-07	1.43491e-05
Cs1g18360	1.11464	5.45149	2.39671e-07	1.51885e-05
Cs5g20420	1.07927	7.24949	2.44748e-07	1.54627e-05
Cs3g08350	-3.61973	0.512402	2.50325e-07	1.57294e-05
orange1.1t04895	4.02542	0.173099	2.50964e-07	1.57294e-05
orange1.1t05411	-2.33474	2.11829	2.51261e-07	1.57294e-05
Cs5g27440	-2.4078	1.73474	2.54745e-07	1.58992e-05
Cs1g02440	-4.33255	0.260634	2.59096e-07	1.61218e-05
Cs6g12870	1.15203	8.48541	2.7334e-07	1.69569e-05
Cs3g01460	-1.2153	5.21244	2.86268e-07	1.77056e-05
Cs8g07470	-1.3138	5.24697	2.92979e-07	1.80665e-05
orange1.1t03822	-1.84051	2.7041	3.04592e-07	1.87265e-05
Cs1g21810	-1.67694	3.09977	3.0854e-07	1.88992e-05
Cs7g08960	-1.22102	5.3659	3.09236e-07	1.88992e-05
Cs7g13060	-3.06496	0.8824	3.35767e-07	2.04599e-05
Cs3g14000	-1.47472	3.72851	3.48668e-07	2.11834e-05
Cs2g10090	-1.43499	3.7996	3.57852e-07	2.16774e-05
Cs3g16480	-1.34667	6.35862	3.72286e-07	2.24856e-05
Cs2g03290	1.16037	4.88632	3.74546e-07	2.2556e-05
Cs9g14360	-4.05293	2.98608	3.85607e-07	2.31544e-05
Cs7g29860	1.39208	4.02955	3.95691e-07	2.36909e-05
Cs5g03430	-5.05788	0.63094	4.01811e-07	2.39876e-05
Cs6g14380	1.17539	4.95038	4.25539e-07	2.52837e-05
orange1.1t01983	1.08492	5.06303	4.25978e-07	2.52837e-05
Cs3g06480	-1.44381	3.62992	4.38383e-07	2.59452e-05
orange1.1t02069	-1.13371	5.00109	4.44034e-07	2.62044e-05
orange1.1t01567	1.15779	5.23778	4.57649e-07	2.69307e-05
Cs8g09730	1.37638	5.70298	4.61189e-07	2.70617e-05
Cs1g08440	-1.6015	8.09636	4.68516e-07	2.74135e-05
Cs5g10140	-1.31869	7.93648	4.70622e-07	2.74587e-05
Cs1g14880	-1.6715	4.11077	4.72196e-07	2.74728e-05
Cs3g16490	-1.82059	3.34881	4.7844e-07	2.77576e-05
Cs5g11560	-1.40528	5.67404	4.85179e-07	2.80695e-05
Cs2g27230	-1.0584	6.14308	4.9425e-07	2.85142e-05
Cs1g17030	-8.36603	0.363182	5.03125e-07	2.89451e-05
Cs6g07510	-1.87394	5.53072	5.1381e-07	2.94775e-05
Cs2g22280	-4.45949	-0.667519	5.34589e-07	3.05844e-05
orange1.1t03764	-1.29242	6.53942	5.40814e-07	3.08548e-05
Cs6g15460	1.06466	9.30934	5.69014e-07	3.23741e-05
Cs6g09770	1.13967	7.90061	5.73413e-07	3.25345e-05
orange1.1t00578	-3.4051	3.72235	5.78196e-07	3.27157e-05
Cs9g06170	-4.70192	0.809858	6.12154e-07	3.45422e-05
Cs8g17390	-1.57129	5.95697	6.18465e-07	3.4803e-05
Cs5g09860	-2.95804	0.861085	6.33416e-07	3.55473e-05
Cs8g04920	1.02484	9.56239	6.37271e-07	3.56664e-05
Cs3g11030	-1.37757	3.886	6.43321e-07	3.59074e-05
orange1.1t01159	3.88699	0.248532	6.45697e-07	3.59426e-05
Cs2g09850	1.09802	5.14375	6.50224e-07	3.60971e-05
Cs2g15360	-1.15982	6.32408	6.6284e-07	3.66985e-05
Cs5g06590	-2.65868	6.49338	6.77438e-07	3.74062e-05
Cs8g18580	-2.26789	5.74145	6.84695e-07	3.77058e-05
Cs5g12410	-4.05115	0.750295	7.32644e-07	4.02388e-05
Cs3g05310	2.19212	2.02201	7.43899e-07	4.07483e-05
Cs1g11360	1.06812	8.83826	7.46225e-07	4.07672e-05
Cs9g04050	4.09713	0.0193046	7.5644e-07	4.1216e-05
Cs3g17190	-2.0435	4.6869	7.66615e-07	4.16602e-05
Cs6g17060	-1.29627	5.40379	7.76264e-07	4.20735e-05
Cs8g11480	-4.18356	0.123861	7.78673e-07	4.20933e-05
Cs2g22810	2.6387	1.35358	8.11633e-07	4.37602e-05
Cs8g19230	-2.08357	5.64064	8.17408e-07	4.38411e-05
Cs4g17400	-3.43164	3.85714	8.1952e-07	4.38411e-05
Cs5g03420	-1.79301	6.88823	8.36389e-07	4.46276e-05
Cs2g02640	-1.15845	7.03234	8.63639e-07	4.59625e-05
Cs1g13700	-1.01203	6.75671	9.0292e-07	4.79293e-05
Cs7g08100	-2.89557	1.26044	9.14321e-07	4.84096e-05
Cs9g14500	3.76171	0.936734	9.17544e-07	4.84557e-05
Cs3g07280	-1.05967	8.37221	9.36128e-07	4.93107e-05
Cs7g02360	1.85249	2.96878	9.38583e-07	4.93139e-05
Cs2g07100	-1.82466	7.34165	9.79871e-07	5.13522e-05
orange1.1t02448	-1.57546	3.61307	9.98886e-07	5.22159e-05
orange1.1t02385	-2.39859	2.68025	1.02536e-06	5.34642e-05
Cs6g08120	-2.30737	1.33053	1.06124e-06	5.51952e-05
Cs2g22040	-2.25449	2.62976	1.08289e-06	5.61792e-05
Cs1g22680	1.2572	6.51802	1.09396e-06	5.66109e-05
Cs9g19270	1.00671	10.5744	1.0972e-06	5.66362e-05
Cs5g26450	-1.21464	4.86746	1.10665e-06	5.69812e-05
Cs7g23810	-3.44399	2.73026	1.11404e-06	5.7219e-05
orange1.1t02024	-2.92142	0.828141	1.13879e-06	5.83443e-05
Cs9g16440	-1.72582	2.86542	1.14862e-06	5.87024e-05
Cs9g10650	-4.56201	1.5926	1.16817e-06	5.95537e-05
Cs7g16840	-1.56631	4.473	1.18506e-06	6.02655e-05
Cs2g06650	-1.4184	9.92735	1.19275e-06	6.05069e-05
orange1.1t02899	1.26396	3.92139	1.21764e-06	6.16182e-05
Cs7g22555	-1.4205	3.71956	1.23701e-06	6.24449e-05
Cs9g05910	-2.44569	1.68033	1.24544e-06	6.27164e-05
Cs9g01330	1.06685	7.24798	1.28381e-06	6.4491e-05
Cs2g05450	-2.6653	5.38752	1.30414e-06	6.53136e-05
Cs7g19070	7.47637	-0.43908	1.30653e-06	6.53136e-05
Cs7g11210	1.36669	6.37378	1.31403e-06	6.54127e-05
Cs5g29830	-1.71965	7.10622	1.31486e-06	6.54127e-05
Cs5g03060	-2.43621	4.45702	1.33566e-06	6.62872e-05
Cs1g03580	-3.59051	0.488685	1.34037e-06	6.63451e-05
Cs1g05070	-1.12478	5.12114	1.34327e-06	6.63451e-05
Cs9g07180	-2.21657	1.52552	1.36393e-06	6.72043e-05
Cs5g15170	1.24346	6.68216	1.38499e-06	6.80792e-05
Cs6g09820	1.17872	8.741	1.41261e-06	6.92717e-05
Cs1g22570	-2.90765	4.82325	1.42975e-06	6.99454e-05
Cs2g30190	-2.46565	0.957004	1.44738e-06	7.06405e-05
orange1.1t03150	-3.78631	1.8795	1.45911e-06	7.10445e-05
Cs9g09740	-1.80239	6.61066	1.48359e-06	7.20659e-05
Cs7g26710	1.67218	6.36078	1.48849e-06	7.21339e-05
Cs1g14810	-2.99515	0.826631	1.49217e-06	7.21426e-05
Cs3g26640	1.07267	9.04221	1.53316e-06	7.39507e-05
Cs2g30460	1.15543	8.42563	1.57023e-06	7.55616e-05
orange1.1t04355	1.32259	5.22159	1.58438e-06	7.60652e-05
Cs2g04400	-1.24346	6.02455	1.61188e-06	7.70591e-05
Cs6g15350	-2.42096	1.42449	1.61257e-06	7.70591e-05
Cs9g14520	3.21398	0.255071	1.62151e-06	7.73071e-05
Cs8g18450	-1.91268	4.29204	1.64e-06	7.79663e-05
Cs6g01740	-2.3281	2.05423	1.64377e-06	7.79663e-05
Cs9g01160	-2.64106	2.72716	1.6467e-06	7.79663e-05
Cs5g05650	1.12356	9.66578	1.6605e-06	7.84396e-05
Cs7g05170	-1.22177	5.96372	1.68661e-06	7.93093e-05
Cs6g12620	-1.06805	6.80653	1.69606e-06	7.95719e-05
Cs4g09090	-1.28103	5.26705	1.71935e-06	8.04812e-05
orange1.1t00706	-1.50538	3.602	1.72793e-06	8.06992e-05
Cs8g12690	-1.34977	7.55777	1.7581e-06	8.19229e-05
Cs2g27760	-2.45399	1.34834	1.79004e-06	8.31784e-05
Cs6g09420	-2.09891	5.51294	1.79313e-06	8.31784e-05
Cs6g15920	1.07574	6.05788	1.82612e-06	8.45185e-05
Cs1g03930	-4.54625	0.864281	1.88872e-06	8.72201e-05
orange1.1t01704	2.61336	1.47963	1.89366e-06	8.72525e-05
Cs6g12920	-2.53339	2.0347	1.92812e-06	8.86419e-05
orange1.1t02800	-1.3367	3.6213	1.93632e-06	8.88206e-05
Cs1g13690	-1.0427	7.76461	1.95266e-06	8.93713e-05
Cs5g12930	-4.93107	-0.279116	1.95763e-06	8.94001e-05
Cs9g17670	2.19905	2.16633	1.99893e-06	9.10842e-05
Cs5g02420	-3.24111	1.40335	2.02729e-06	9.21721e-05
Cs3g12210	-1.45228	6.85349	2.04299e-06	9.26815e-05
Cs6g15480	-1.42444	3.96498	2.08266e-06	9.42736e-05
Cs1g09665	-2.96954	1.11657	2.12594e-06	9.60218e-05
Cs3g19930	-1.43366	3.24106	2.20409e-06	9.93337e-05
Cs2g09020	-1.41921	8.14847	2.2193e-06	9.98004e-05
Cs3g23050	-2.97006	5.96751	2.22627e-06	9.9896e-05
Cs8g14280	1.46053	6.72777	2.24644e-06	0.000100582
orange1.1t02980	2.55542	2.31941	2.26407e-06	0.000101152
Cs2g09160	1.53918	4.35166	2.28917e-06	0.000102051
Cs8g06370	-1.33317	6.4851	2.30747e-06	0.000102645
orange1.1t04499	-1.00464	6.24601	2.3324e-06	0.00010353
Cs5g28320	-1.01144	6.04827	2.40996e-06	0.000106743
Cs7g22600	-1.38046	3.884	2.4293e-06	0.000107369
Cs2g06900	-1.43429	5.64284	2.43888e-06	0.000107561
Cs2g19300	-1.66768	6.03189	2.46583e-06	0.000108329
Cs7g09590	-1.18014	7.18288	2.46686e-06	0.000108329
Cs1g01220	-3.08828	0.589255	2.47207e-06	0.000108329
Cs2g01120	-5.29664	-0.648689	2.49352e-06	0.000109037
Cs7g27190	-1.11325	7.56261	2.51661e-06	0.000109658
Cs9g12710	-1.82388	3.64888	2.51838e-06	0.000109658
Cs9g03200	1.0927	4.71767	2.56022e-06	0.000110859
orange1.1t00072	-3.32513	1.0287	2.56065e-06	0.000110859
Cs3g18050	-1.8862	3.28442	2.56208e-06	0.000110859
orange1.1t05417	-2.42666	1.91854	2.78984e-06	0.00012046
Cs8g02230	2.37541	2.57399	2.87532e-06	0.000123891
Cs1g04570	-1.10826	7.79474	2.92605e-06	0.000125814
Cs5g03390	-3.53296	-0.00613413	3.01419e-06	0.000129334
Cs4g03220	-2.35562	0.95877	3.06543e-06	0.000131259
Cs2g16120	-2.68031	1.762	3.07254e-06	0.000131291
Cs2g04430	-1.56187	7.0166	3.09864e-06	0.000132132
Cs3g20230	1.27235	5.72684	3.14921e-06	0.000133734
Cs8g01090	-2.50667	3.88325	3.19279e-06	0.000135239
Cs5g28730	3.33669	2.64559	3.19777e-06	0.000135239
Cs1g20890	-1.38488	3.78235	3.21229e-06	0.000135564
Cs9g09530	-1.32439	4.76061	3.21863e-06	0.000135564
Cs3g11420	-1.27241	5.23754	3.24675e-06	0.000136167
orange1.1t01321	-1.15795	5.37872	3.24758e-06	0.000136167
orange1.1t00611	-1.74772	3.23163	3.25277e-06	0.000136167
Cs1g22910	2.37689	2.73862	3.29323e-06	0.000137581
Cs3g06830	1.68675	8.42731	3.3112e-06	0.000138052
Cs2g03110	-1.92698	6.65873	3.53395e-06	0.000146745
Cs4g14150	-6.62429	-1.11699	3.5754e-06	0.000148167
Cs4g10110	-2.13324	3.23189	3.68163e-06	0.000152263
Cs7g04340	1.10349	4.45169	3.7098e-06	0.00015312
Cs9g13980	-1.04922	5.03888	3.74084e-06	0.000154093
Cs3g03970	-2.74919	7.52797	3.7512e-06	0.000154211
Cs3g11760	1.22694	4.76502	3.76597e-06	0.000154477
Cs7g25790	-4.05625	-0.563646	3.77266e-06	0.000154477
Cs7g05440	-1.08418	5.21788	3.90688e-06	0.000159339
Cs3g08940	1.14085	4.45744	3.92985e-06	0.000159959
Cs5g17000	1.01868	6.53171	3.97078e-06	0.000161306
Cs7g09430	-1.93604	2.55429	4.00759e-06	0.000162481
Cs5g22810	1.37932	4.04686	4.02942e-06	0.000162839
Cs8g14690	-2.8731	1.50993	4.03225e-06	0.000162839
Cs2g23820	1.4029	4.48878	4.05088e-06	0.000163272
orange1.1t04743	-1.30814	4.1521	4.16223e-06	0.000167337
orange1.1t00235	-1.7837	2.39617	4.16798e-06	0.000167337
orange1.1t05252	-4.77402	-1.05968	4.256e-06	0.000170538
Cs5g01220	1.16995	4.71951	4.28955e-06	0.000171549
orange1.1t03613	-1.06497	5.08574	4.38729e-06	0.000175117
Cs9g06540	1.15149	6.29065	4.4113e-06	0.000175735
Cs1g08010	1.31753	8.11346	4.46412e-06	0.000177496
Cs1g02740	1.19933	5.02329	4.58778e-06	0.000182061
Cs8g19650	-1.00198	5.85694	4.61786e-06	0.000182903
Cs7g17630	2.34942	1.15708	4.67844e-06	0.000184947
Cs4g17260	-1.31985	6.48317	4.6921e-06	0.000185131
Cs3g01280	-1.1579	4.54684	4.76978e-06	0.000187836
Cs2g27220	-1.95783	2.31387	4.84816e-06	0.000190559
Cs5g18500	-1.68244	3.67938	4.8961e-06	0.000192076
Cs7g29770	-3.02571	4.34428	5.08721e-06	0.000199194
orange1.1t01749	-1.63177	4.10086	5.13189e-06	0.000200563
Cs8g17450	1.07144	7.55039	5.14997e-06	0.000200888
Cs7g06720	-3.26128	2.7245	5.26249e-06	0.000204889
Cs9g04120	3.233	1.73019	5.30593e-06	0.000205847
Cs6g11940	1.04193	9.40213	5.30708e-06	0.000205847
Cs9g04200	-2.94363	2.28182	5.32384e-06	0.000206109
Cs4g11700	-2.76646	1.67385	5.34874e-06	0.000206397
Cs2g21170	-1.04603	5.67124	5.35134e-06	0.000206397
Cs9g18470	1.0794	4.42779	5.41165e-06	0.000208333
Cs9g18680	-2.21323	2.24813	5.46253e-06	0.0002099
Cs7g12450	1.34607	3.8712	5.47686e-06	0.000209912
Cs4g02820	-1.78649	2.73475	5.48852e-06	0.000209912
Cs5g01890	-1.75949	2.89755	5.49342e-06	0.000209912
orange1.1t01117	-1.76568	2.3683	5.52211e-06	0.000210618
Cs2g28140	-3.48014	-0.447559	5.58257e-06	0.00021253
Cs1g19400	1.40763	3.70872	5.62354e-06	0.000213695
Cs7g08620	1.29956	9.98871	5.77319e-06	0.000218977
Cs7g31240	-1.76473	5.6781	5.83023e-06	0.000220734
orange1.1t02223	-1.57029	5.17384	5.84792e-06	0.000220998
Cs4g20060	4.14696	1.55953	5.8622e-06	0.000221131
Cs2g29060	-1.67127	3.09774	5.93498e-06	0.000223361
Cs2g10140	4.70471	4.56692	5.94299e-06	0.000223361
Cs4g03050	-1.94123	2.10146	6.02894e-06	0.000225767
Cs3g13300	-1.25925	6.19516	6.084e-06	0.000227416
Cs2g25360	-3.70637	-0.522848	6.16066e-06	0.000229448
Cs3g18660	-3.19162	0.27812	6.17233e-06	0.000229468
Cs1g26480	-1.24304	3.77154	6.22709e-06	0.000231087
Cs7g08220	-1.687	3.14128	6.24715e-06	0.000231414
Cs4g14510	-2.37219	3.93016	6.30947e-06	0.000233303
orange1.1t02759	-2.39651	4.09053	6.40155e-06	0.000236284
Cs5g03440	1.2898	6.68142	6.44213e-06	0.000237356
Cs9g06030	-2.89729	1.52783	6.5732e-06	0.000241582
Cs2g22800	4.25007	1.38388	6.58379e-06	0.000241582
Cs4g03740	2.14687	5.47067	6.59348e-06	0.000241582
Cs1g10100	1.23787	6.96206	6.60374e-06	0.000241582
Cs6g09640	1.1672	7.46048	6.64786e-06	0.000242765
orange1.1t03479	-1.14888	7.94978	6.7285e-06	0.000245275
orange1.1t02388	1.05087	6.20457	6.79165e-06	0.000247139
Cs5g29870	-3.42458	2.10346	6.8636e-06	0.000249317
Cs9g01250	-1.10575	4.8902	6.96002e-06	0.000252374
Cs8g17800	-1.97149	4.15118	7.10366e-06	0.000256679
Cs1g12560	1.18736	4.3346	7.31025e-06	0.000263681
Cs2g06730	-1.71813	2.70153	7.33564e-06	0.000264134
Cs1g19290	-1.33646	7.26115	7.3854e-06	0.000265462
Cs2g03820	1.50795	3.58196	7.42896e-06	0.000266563
Cs2g02180	-1.0121	8.12008	7.48541e-06	0.00026761
Cs2g09460	-1.19819	6.26514	7.51481e-06	0.00026761
Cs7g24030	-1.18619	8.31132	7.53104e-06	0.00026761
Cs5g33410	-1.99149	1.91911	7.53611e-06	0.00026761
Cs2g17260	-1.40569	3.74999	7.57836e-06	0.000268647
Cs9g09720	1.00991	4.6858	7.7832e-06	0.000275434
Cs8g17030	2.57053	2.1567	7.81426e-06	0.000275861
Cs5g31280	-2.14476	3.13322	7.82204e-06	0.000275861
Cs3g02600	-1.35994	5.52548	7.92434e-06	0.000278515
Cs1g05960	-3.16652	1.5857	8.01701e-06	0.000281292
Cs5g11490	2.64129	0.563857	8.15141e-06	0.00028548
Cs8g17930	-1.90991	4.23543	8.28084e-06	0.000289072
orange1.1t01766	-2.2103	4.03509	8.31092e-06	0.000289608
Cs3g18240	-1.08525	4.63168	8.43136e-06	0.000292837
Cs3g06640	-2.8233	0.287712	8.50866e-06	0.000295024
Cs5g19240	-3.35386	0.630945	8.74593e-06	0.000302233
Cs9g17380	2.57797	7.81153	8.77611e-06	0.000302768
Cs2g07190	-1.34523	5.46654	8.7966e-06	0.000302968
Cs8g10370	-1.09494	4.412	9.01532e-06	0.000309983
Cs6g17360	-1.88203	3.01161	9.35673e-06	0.000321185
Cs3g18710	1.87061	2.88202	9.80101e-06	0.000335876
Cs2g12170	2.95834	0.608847	9.87893e-06	0.000337984
Cs4g13160	-1.7375	3.84563	9.89631e-06	0.000338017
Cs1g21680	-1.97161	5.31344	9.93227e-06	0.000338684
Cs1g09010	1.35411	3.29696	1.00565e-05	0.000341788
orange1.1t03336	1.47317	3.92228	1.01723e-05	0.000345156
Cs6g15380	-2.80434	3.38838	1.04867e-05	0.000355235
Cs4g05890	-2.91356	4.46649	1.0701e-05	0.000361901
Cs8g09780	1.28152	8.69149	1.07898e-05	0.000363709
Cs3g23740	-1.46698	3.85541	1.09517e-05	0.000368564
Cs2g04220	-1.44121	5.7507	1.11145e-05	0.000373434
Cs5g30530	-1.22859	4.13871	1.11598e-05	0.000374345
Cs7g30170	-2.88787	2.67848	1.1399e-05	0.000381551
Cs5g10550	1.59482	9.6594	1.14117e-05	0.000381551
Cs2g10550	-1.21849	6.76313	1.163e-05	0.00038822
Cs2g17170	-2.88429	2.04482	1.16943e-05	0.000389735
Cs9g09450	-1.83019	4.7973	1.18135e-05	0.000393069
Cs5g10670	-1.30149	6.21327	1.19417e-05	0.000396056
Cs5g23150	1.0139	5.21405	1.2062e-05	0.000399405
Cs3g03335	-4.05432	-0.241507	1.21651e-05	0.00040217
Cs7g25850	1.1606	6.7661	1.24336e-05	0.000409733
Cs9g06270	1.13132	8.79472	1.24623e-05	0.000410023
Cs2g17370	-2.33442	1.91204	1.28434e-05	0.000421886
Cs2g11250	-1.02613	6.43757	1.30016e-05	0.000426402
Cs7g10200	-1.20082	7.62483	1.30607e-05	0.000426982
Cs3g21660	-1.7045	7.21835	1.3313e-05	0.000434539
Cs9g18740	1.21404	3.97529	1.34312e-05	0.000437703
Cs5g18010	-2.25786	6.04179	1.35605e-05	0.000441219
Cs5g09230	-1.81959	4.24563	1.36364e-05	0.000442989
Cs9g08750	-1.25307	8.19247	1.37767e-05	0.000446844
Cs1g23090	-1.99869	3.06044	1.38004e-05	0.000446909
Cs7g31000	-1.31445	8.32017	1.41681e-05	0.000457375
Cs1g03390	-2.75111	0.552983	1.4201e-05	0.000457721
orange1.1t03173	1.10161	4.43417	1.4236e-05	0.000458131
Cs2g13760	-1.28701	4.62115	1.42948e-05	0.000458995
Cs5g04020	1.01026	5.21037	1.43074e-05	0.000458995
Cs5g12890	1.96736	1.61089	1.4497e-05	0.000464356
Cs3g11620	-1.21522	4.69423	1.50844e-05	0.000481673
Cs6g13590	-1.4018	7.76632	1.51834e-05	0.000484081
Cs5g26130	1.01114	6.71552	1.53167e-05	0.000487578
Cs5g24990	2.98805	0.184942	1.55314e-05	0.00049365
Cs3g23030	-1.67977	3.13265	1.5804e-05	0.000500768
Cs7g13500	-1.23786	6.17706	1.59336e-05	0.0005041
Cs6g03020	1.12483	6.7852	1.61901e-05	0.000511428
Cs6g19340	-2.06757	2.92032	1.63068e-05	0.00051429
Cs9g06060	-2.55485	4.20766	1.63306e-05	0.00051429
Cs7g06010	-3.77082	-0.468831	1.67641e-05	0.00052553
Cs9g09290	4.15221	6.45125	1.6967e-05	0.000531082
Cs8g12000	-1.36219	6.30501	1.70367e-05	0.000532455
Cs5g28190	-1.51928	3.6708	1.70943e-05	0.00053344
Cs5g31400	2.33887	0.987004	1.71371e-05	0.00053344
Cs8g18700	-1.23331	6.30159	1.71459e-05	0.00053344
Cs3g24280	-2.39035	1.95533	1.74064e-05	0.000540558
Cs4g10140	-1.51088	5.63412	1.74272e-05	0.000540558
Cs1g23250	10.6011	2.48647	1.76343e-05	0.000546159
Cs5g16830	1.7533	2.40193	1.82355e-05	0.000563933
orange1.1t00829	-1.37859	3.56779	1.83665e-05	0.00056713
orange1.1t00446	-1.9137	1.68691	1.89938e-05	0.000584747
Cs2g13610	-1.30237	5.42154	1.90312e-05	0.000585024
Cs1g09575	-4.10349	-0.198496	1.91271e-05	0.000587096
Cs4g20530	-1.16595	3.77408	1.97751e-05	0.000605184
Cs8g20420	-1.2335	6.19733	1.99551e-05	0.000609784
Cs6g09550	-6.57613	-1.14973	2.05487e-05	0.000626995
Cs3g06740	-1.88879	2.63138	2.06967e-05	0.000630575
Cs5g04430	1.07291	6.41233	2.07558e-05	0.000631441
Cs6g16980	1.06764	8.4281	2.11833e-05	0.000643496
Cs4g12710	-1.65188	5.73227	2.20934e-05	0.000669171
Cs4g03580	-1.0709	6.39529	2.26757e-05	0.000683791
Cs2g22050	-4.53059	-1.23955	2.27764e-05	0.000685544
Cs7g09550	1.29112	3.50136	2.28004e-05	0.000685544
Cs1g09420	1.05943	9.49172	2.2858e-05	0.000686272
Cs9g10480	-2.0155	5.00419	2.30051e-05	0.00068939
Cs4g15280	-1.48607	6.85486	2.30288e-05	0.00068939
Cs8g13740	2.19123	7.44334	2.32837e-05	0.000695001
Cs2g21150	1.68235	3.87319	2.34379e-05	0.000698591
Cs7g30500	-1.28734	4.59479	2.34941e-05	0.000699255
Cs6g20030	-2.38715	4.37511	2.36108e-05	0.000701715
orange1.1t04009	1.09609	4.78463	2.41972e-05	0.000718101
Cs2g22180	-7.2024	-0.651621	2.42512e-05	0.000718101
Cs9g18030	1.00145	6.30611	2.42668e-05	0.000718101
Cs5g10830	-3.65297	-0.873848	2.46672e-05	0.000728902
Cs6g16930	-1.72006	5.42567	2.471e-05	0.000729121
Cs3g18490	-1.49823	3.98725	2.49854e-05	0.000736194
Cs4g11610	-2.78302	0.964375	2.52989e-05	0.000744365
Cs5g07160	-1.48369	3.33728	2.58518e-05	0.000757388
Cs6g15950	2.04779	1.09225	2.64898e-05	0.000774979
Cs5g19460	-2.2928	0.513472	2.65851e-05	0.000775563
Cs9g13750	9.03566	0.974721	2.70918e-05	0.000787924
Cs6g12480	-1.41465	7.27332	2.71236e-05	0.000787924
Cs4g02680	3.90463	2.34743	2.76191e-05	0.000799463
Cs1g15970	-1.6486	8.20077	2.76373e-05	0.000799463
Cs1g13410	-2.42316	2.41972	2.78633e-05	0.000804871
Cs2g22790	3.76516	0.727205	2.79564e-05	0.000806429
Cs1g07600	1.17219	4.77588	2.80803e-05	0.000808871
Cs3g23170	-4.40166	-0.711648	2.81323e-05	0.000809237
Cs2g03490	-2.77737	0.710162	2.81717e-05	0.000809239
Cs3g16240	-2.89065	5.45825	2.83121e-05	0.00081214
Cs1g21970	-1.90047	4.60801	2.91334e-05	0.000834536
Cs6g07410	5.16643	2.6777	2.94291e-05	0.000841835
Cs2g15260	-3.21054	1.75892	2.96037e-05	0.000845656
orange1.1t00493	1.1997	10.428	2.99368e-05	0.000853987
Cs9g16480	-1.13564	4.6016	3.06143e-05	0.000872105
orange1.1t00633	-2.43052	0.298107	3.07718e-05	0.000874481
Cs7g16380	1.66833	2.66621	3.07826e-05	0.000874481
Cs8g08310	-1.05603	4.54821	3.10063e-05	0.000879621
Cs9g04140	1.08785	5.0277	3.14684e-05	0.000890697
Cs3g08920	-3.80433	-0.446645	3.15264e-05	0.000890697
Cs1g24230	-1.16873	7.41032	3.16614e-05	0.000893285
Cs7g16980	-1.44217	3.8993	3.18459e-05	0.000897262
Cs1g10610	-1.17474	4.58598	3.18979e-05	0.000897499
Cs7g21230	-1.1221	8.66094	3.21326e-05	0.000902869
Cs9g06200	-6.06187	-1.52235	3.23488e-05	0.000907706
Cs1g08380	-1.90073	4.43073	3.24437e-05	0.000908398
Cs8g01470	-1.09304	6.22378	3.24852e-05	0.000908398
Cs7g28110	-1.07872	6.03486	3.26968e-05	0.000912499
Cs7g09440	-1.39718	5.62591	3.30175e-05	0.0009202
Cs8g15510	3.2525	1.42138	3.31152e-05	0.000921568
Cs6g15290	-1.6732	10.6629	3.33911e-05	0.00092685
Cs4g09770	-1.1154	6.58955	3.35524e-05	0.000930074
Cs2g27100	-2.47174	2.21353	3.39251e-05	0.000937626
Cs7g30530	-2.71861	0.37338	3.39614e-05	0.000937626
Cs3g16600	-1.2662	3.79243	3.43745e-05	0.000947762
Cs9g14450	-5.16413	-0.757564	3.48229e-05	0.000958841
Cs1g21830	-1.3044	5.16029	3.50389e-05	0.000962216
Cs6g08390	1.42993	3.19559	3.51853e-05	0.000964948
Cs6g08410	2.18716	0.87309	3.55753e-05	0.000974347
Cs7g31360	-1.69747	5.60139	3.62146e-05	0.000989226
orange1.1t01747	-3.51333	-0.976908	3.66473e-05	0.000999719
Cs4g20010	-1.53192	2.72746	3.7033e-05	0.00100757
Cs7g10130	-1.17514	6.25534	3.72708e-05	0.0010127
Cs8g10300	7.10993	2.82725	3.82903e-05	0.00103767
orange1.1t02003	-1.3409	4.35768	3.88145e-05	0.00105049
Cs7g27110	-2.16862	0.935995	3.92993e-05	0.00106108
Cs2g25210	1.65525	3.27304	3.96427e-05	0.00106869
Cs2g30300	-1.07779	6.31939	4.02861e-05	0.0010832
Cs4g19060	-1.74069	5.08752	4.06447e-05	0.00109077
orange1.1t00177	-1.92414	1.32713	4.06734e-05	0.00109077
Cs7g11270	-1.07572	6.5172	4.12645e-05	0.00110518
Cs3g25940	-1.62159	3.22293	4.16183e-05	0.00111321
Cs5g13490	-1.27226	3.07149	4.17409e-05	0.00111504
Cs6g07030	-2.20369	0.964229	4.21488e-05	0.00112448
Cs6g21850	1.00828	10.0722	4.31842e-05	0.00115035
orange1.1t00255	-5.36043	-0.60108	4.3261e-05	0.00115035
Cs1g20040	-4.83306	0.428285	4.3286e-05	0.00115035
Cs3g18760	-1.65711	6.74696	4.3405e-05	0.00115202
Cs7g17640	-6.53629	-1.1798	4.50961e-05	0.00119383
Cs5g18050	-2.39679	5.24414	4.56708e-05	0.0012044
orange1.1t02917	3.71674	-0.298046	4.88185e-05	0.00127922
orange1.1t01456	-4.6225	1.10565	5.04047e-05	0.0013191
Cs7g12610	-2.79015	2.29549	5.15834e-05	0.00134824
Cs7g07450	1.32935	3.65471	5.20212e-05	0.00135796
orange1.1t03024	2.95851	8.652	5.22606e-05	0.00136076
Cs3g23560	1.75113	3.62515	5.3343e-05	0.00138544
Cs2g04480	-3.57956	0.606994	5.42708e-05	0.00140422
Cs9g06500	1.38802	5.16569	5.46043e-05	0.00141108
Cs3g25570	-3.22397	-0.258133	5.47751e-05	0.00141372
Cs3g11300	-2.38622	0.265404	5.63581e-05	0.00145063
Cs6g18380	-1.17968	6.72805	5.64164e-05	0.00145063
Cs9g18910	-1.38497	4.3403	5.68458e-05	0.00145985
Cs1g16010	-2.83616	0.386653	5.72591e-05	0.00146863
Cs3g22170	3.21158	0.00458467	5.75569e-05	0.0014726
Cs4g12450	-4.90851	-0.954149	5.9548e-05	0.00151977
Cs4g06630	-1.41642	3.27778	5.99007e-05	0.00152622
orange1.1t03242	1.88895	2.43237	5.9949e-05	0.00152622
Cs1g16030	-2.70889	1.51887	6.05561e-05	0.00153792
orange1.1t02389	-1.20105	8.91828	6.0558e-05	0.00153792
orange1.1t01963	-1.08469	6.2472	6.08757e-05	0.00154408
Cs2g06420	9.65799	1.56893	6.16076e-05	0.00155881
orange1.1t03773	1.43447	4.39007	6.18285e-05	0.00156248
Cs4g16650	1.02548	7.57951	6.2163e-05	0.00156901
Cs6g16900	-1.63166	4.58717	6.26255e-05	0.00157875
orange1.1t01574	7.89739	-0.0758202	6.37426e-05	0.00160494
Cs9g05630	-2.06362	4.24245	6.40695e-05	0.0016112
Cs8g02590	-1.72319	2.43975	6.44912e-05	0.00161983
Cs4g07930	4.75561	-1.10893	6.4573e-05	0.00161991
Cs2g12740	-1.15753	4.59015	6.49662e-05	0.00162779
Cs5g01740	-3.16222	-0.485286	6.52732e-05	0.00163349
Cs3g05870	-2.71579	-0.102647	6.54776e-05	0.00163662
Cs3g21530	-1.29774	6.25983	6.58863e-05	0.00164484
Cs8g01880	-1.59775	6.83237	6.6e-05	0.00164568
Cs3g24940	-3.77352	-0.779688	6.62284e-05	0.00164801
Cs8g01260	-1.37981	4.68564	6.62533e-05	0.00164801
Cs5g21200	2.64446	0.353518	6.73282e-05	0.0016687
Cs8g12370	-1.42317	6.11933	6.7517e-05	0.00167137
orange1.1t04930	-2.04509	1.77057	6.76839e-05	0.00167336
orange1.1t02108	-1.12516	6.71737	6.776e-05	0.00167336
Cs7g26860	-1.97929	1.56745	6.83122e-05	0.00168498
orange1.1t05415	-2.37	1.47501	6.85061e-05	0.00168774
Cs1g26070	-1.10017	5.37479	6.8949e-05	0.00169662
orange1.1t02045	-1.59716	5.00792	7.06087e-05	0.00173332
orange1.1t01425	-2.69614	1.316	7.17723e-05	0.00175937
Cs8g18210	-1.01675	5.52222	7.18407e-05	0.00175937
Cs2g27090	-4.10647	0.0635595	7.21517e-05	0.00176489
Cs2g28330	-6.32862	-1.33777	7.43157e-05	0.00181351
orange1.1t04139	1.20258	9.11217	7.63456e-05	0.00186084
Cs5g28710	1.22487	6.79722	7.78751e-05	0.00189588
Cs4g08740	-2.5542	-0.117915	7.80834e-05	0.00189871
Cs8g12630	-5.40038	0.942948	7.83814e-05	0.00190243
orange1.1t05522	1.55843	4.65937	8.14718e-05	0.00197179
Cs3g26680	-2.3227	3.72906	8.26475e-05	0.00199616
Cs7g05970	-1.3186	3.34313	8.26724e-05	0.00199616
Cs7g18660	-3.08852	-0.541842	8.50376e-05	0.00205086
Cs3g27810	-1.5897	7.49806	8.57002e-05	0.00206442
Cs8g08600	-1.56705	5.30625	8.81572e-05	0.00211865
orange1.1t01968	-2.73781	1.77476	8.89334e-05	0.00213482
Cs7g07320	-2.07291	1.24424	9.00363e-05	0.00215878
Cs8g04525	-4.3384	-1.37336	9.03483e-05	0.00216374
Cs5g31660	-1.5414	4.15238	9.17789e-05	0.00219545
orange1.1t03034	1.24581	3.40137	9.38665e-05	0.00224278
Cs2g31050	2.69077	4.02268	9.48649e-05	0.00226138
Cs9g14190	-2.19788	1.51131	9.57035e-05	0.00227874
Cs1g21210	1.2581	3.71488	9.63478e-05	0.00229143
Cs5g23550	-2.56748	0.0848552	9.67615e-05	0.00229862
Cs2g11770	-1.30723	4.82406	9.77705e-05	0.00231991
orange1.1t00419	-1.37944	4.15479	9.8383e-05	0.00233176
orange1.1t05258	3.28546	0.417221	0.000100788	0.00238328
Cs4g16030	-1.14819	5.14966	0.000101215	0.00239062
Cs9g06870	1.15919	6.85759	0.000102702	0.00242297
Cs2g20140	-1.17118	3.51287	0.000103137	0.00243044
orange1.1t05175	-8.19279	0.198621	0.000103511	0.00243648
Cs1g21000	1.01331	5.60248	0.000103995	0.00244508
Cs6g15730	-1.30854	4.04385	0.000104852	0.00246182
Cs6g22320	-1.41187	2.50539	0.000104965	0.00246182
Cs1g14896	-1.29726	3.67203	0.000105066	0.00246182
Cs1g15710	-1.2774	4.63476	0.000106715	0.00249479
Cs9g08000	-1.26573	7.87989	0.000108207	0.00252567
Cs1g19830	-1.47063	10.0778	0.000108301	0.00252567
Cs1g08810	-1.19028	6.07427	0.000108491	0.00252567
Cs5g24680	-1.03578	7.75936	0.000108571	0.00252567
Cs1g18110	-3.42348	-0.0947764	0.000108649	0.00252567
Cs2g04320	-1.11089	5.00801	0.000110222	0.00255673
Cs9g19070	-3.26814	2.19916	0.000110234	0.00255673
Cs9g13630	-1.34632	4.74322	0.000110671	0.00256399
Cs9g07280	8.05297	2.5942	0.000112146	0.00259524
Cs1g08450	-1.33374	4.18314	0.000113318	0.00261941
Cs1g21920	-2.92309	-0.0588149	0.00011351	0.00262091
Cs7g31150	-1.42804	5.78911	0.000114208	0.00263293
Cs8g04610	-1.8	6.01005	0.000114286	0.00263293
Cs1g13620	1.00163	8.96918	0.000115009	0.00264661
orange1.1t01926	-1.74568	2.0986	0.00011591	0.0026622
Cs1g15730	-1.05235	7.50756	0.000116474	0.00267138
Cs7g27270	-3.4813	-0.0511532	0.000117168	0.00268432
Cs6g08950	-1.27786	7.83	0.00011959	0.00273674
orange1.1t00964	7.3323	-0.568049	0.000120384	0.00275185
Cs5g19930	-2.20667	2.15731	0.000120601	0.00275316
Cs6g08100	-1.26017	3.2809	0.000120708	0.00275316
Cs5g10750	8.29502	2.05906	0.000120908	0.00275467
Cs6g13640	-2.24753	6.00408	0.000124088	0.00282399
Cs8g10160	1.05695	3.91232	0.000124344	0.00282669
Cs4g06410	-2.21291	3.10524	0.000125364	0.00284674
Cs5g09080	-4.03596	-0.00406361	0.00012562	0.00284941
Cs2g10440	-1.21529	3.20076	0.000127738	0.00289289
Cs8g10950	-1.27379	4.28487	0.000127817	0.00289289
Cs5g03170	2.11549	1.67579	0.000128145	0.00289712
Cs1g14910	-1.0501	4.77333	0.000128639	0.00290509
Cs2g05280	-1.12841	7.94667	0.000135095	0.00304088
Cs8g20900	1.43591	4.14018	0.000136618	0.00306847
Cs3g12130	1.24783	4.25077	0.000137065	0.00307182
Cs1g20620	5.32782	2.66666	0.000137493	0.00307806
Cs7g09680	1.40981	3.40833	0.000137774	0.003081
Cs3g12220	-1.43578	4.73407	0.000140834	0.0031392
Cs5g07854	-6.01033	-1.5599	0.000142838	0.00317699
Cs7g04380	3.21953	-0.296359	0.000143299	0.00318381
Cs3g18110	-1.8233	1.78913	0.000145563	0.00323061
orange1.1t04609	2.33744	0.322041	0.000145973	0.00323361
Cs5g13940	2.2922	2.88514	0.000146012	0.00323361
Cs9g06670	1.51633	3.60505	0.000146261	0.00323565
Cs5g23570	1.16667	4.03657	0.000147193	0.00325278
orange1.1t01430	-2.4196	1.4834	0.000148524	0.00327868
Cs5g24610	2.56803	2.95557	0.000148781	0.00328082
Cs2g23280	-1.38356	4.46674	0.000149579	0.0032949
Cs2g29540	-1.03388	5.6403	0.000150121	0.0033033
orange1.1t01247	-1.9631	4.76067	0.000150744	0.00330993
orange1.1t04182	1.01742	11.5203	0.000151021	0.00331248
Cs5g19020	2.32633	5.28088	0.000153057	0.00335358
orange1.1t05635	5.97658	-1.59575	0.000153636	0.00336268
Cs1g02280	1.28028	7.28781	0.000154405	0.00337594
orange1.1t01290	-3.10519	-0.732411	0.000156551	0.00341565
Cs1g15940	-4.48778	-1.27066	0.000156553	0.00341565
Cs8g20250	-5.74618	-1.73093	0.000157089	0.0034237
Cs5g18660	-1.47528	2.91948	0.00016243	0.00353637
Cs5g03570	-1.05456	4.14192	0.000163789	0.00356219
Cs7g16890	-5.88441	-1.64282	0.000164582	0.00357566
orange1.1t03151	-1.24883	4.1319	0.000164921	0.00357926
Cs6g17210	-2.44881	-0.00522737	0.000165173	0.00358069
Cs2g07720	-1.40203	8.84262	0.000166079	0.00358927
Cs3g23920	-1.32406	6.9482	0.00016638	0.003592
Cs8g09620	-2.06889	2.14654	0.000167901	0.00361724
orange1.1t02914	1.96909	3.46006	0.000168378	0.00362374
Cs9g14660	-1.17489	6.79321	0.000168855	0.00363021
Cs3g14460	-1.21145	6.44949	0.000169523	0.00363558
Cs8g18120	1.29171	6.48403	0.000170278	0.00364558
Cs5g08950	-1.19313	5.53613	0.000172201	0.00368293
Cs2g03840	-1.15137	5.07845	0.000172613	0.00368789
Cs8g06750	-1.22437	5.06112	0.000173125	0.00369501
Cs7g16520	-1.95714	1.42785	0.000173825	0.0037061
Cs5g32740	1.86273	8.11574	0.000174604	0.00371886
Cs2g03430	1.22846	4.23861	0.000179414	0.00381343
orange1.1t04699	-1.28845	3.99904	0.000179738	0.00381637
Cs3g11290	-1.15267	5.37602	0.000181433	0.00384445
Cs8g17460	-1.31554	3.9755	0.000181651	0.0038451
Cs4g06430	-1.66905	4.88076	0.00018259	0.00386102
Cs6g20090	-1.29884	4.58174	0.000184163	0.00389029
Cs7g06130	-1.22375	4.1059	0.000184752	0.00389872
Cs3g03135	-2.17993	0.244042	0.000186838	0.00393321
Cs5g28890	-1.16401	3.89512	0.000186959	0.00393321
Cs9g10700	-1.72793	2.64946	0.00018864	0.00396451
Cs5g13250	-3.37383	0.642884	0.000189989	0.00398838
Cs2g03280	4.07587	-0.996755	0.000190225	0.00398838
Cs6g14840	-1.69652	1.44093	0.000190356	0.00398838
Cs1g21010	3.18982	-0.0231257	0.000190925	0.00399599
Cs4g11010	-2.47151	3.14373	0.000191108	0.00399599
Cs1g09635	-1.27406	3.56927	0.000192092	0.00400945
Cs5g25790	3.33629	1.98893	0.000193419	0.00402796
Cs9g15760	6.09167	-1.51626	0.000195604	0.00406935
Cs1g16000	-2.77099	4.04705	0.000196585	0.00408563
Cs2g18105	-5.81277	-1.68732	0.000196808	0.00408614
Cs4g05200	-1.8055	8.00046	0.000198005	0.00410686
orange1.1t04730	-1.31538	3.01564	0.000198721	0.00411757
Cs5g21870	2.23464	2.789	0.000200828	0.00415704
Cs9g13050	-1.36237	2.94316	0.000201294	0.00416251
Cs2g29090	-4.61612	-0.541227	0.000202538	0.00418403
Cs1g03890	-3.57007	-0.626419	0.000203716	0.00420414
Cs8g06740	-1.13117	5.2822	0.00020837	0.00429154
Cs9g06110	-2.96304	-0.0308204	0.000208864	0.00429154
Cs7g27640	-1.82006	6.06555	0.000208993	0.00429154
Cs7g27120	-3.12618	2.99996	0.000210432	0.00431303
Cs6g09540	-1.16439	6.14878	0.000210458	0.00431303
Cs2g24600	2.64765	2.43875	0.000212827	0.00435128
Cs7g08680	-1.75059	3.48843	0.000213174	0.00435136
Cs2g18240	1.03152	4.31209	0.000215207	0.00438852
Cs6g20220	-2.77859	0.0491228	0.000216856	0.00441034
Cs1g16220	-1.47844	6.82803	0.00021692	0.00441034
Cs1g20180	-1.94834	1.61321	0.000219409	0.00445414
Cs6g05010	-1.47896	2.76585	0.000219506	0.00445414
orange1.1t01945	-1.10567	3.55376	0.000222264	0.00450123
Cs9g17330	-1.75568	2.03259	0.000222677	0.00450516
Cs2g13400	1.06088	3.76296	0.000223657	0.00452055
Cs4g05250	-1.65031	2.7776	0.000224931	0.00454183
Cs3g17340	-5.81486	-1.68675	0.000226458	0.00456374
Cs2g06590	-1.96689	3.3866	0.000227581	0.00457926
Cs5g06980	-1.12932	6.31091	0.000230016	0.00462186
Cs4g06290	-1.22245	7.48529	0.000233185	0.00467908
Cs4g03600	1.99731	0.769065	0.000233318	0.00467908
Cs2g12870	-1.81417	2.99172	0.000233933	0.00468685
Cs9g07220	-6.77683	-1.00221	0.000237575	0.00475058
Cs3g26730	-3.10282	-0.976982	0.000238491	0.00476427
Cs5g03620	-1.57575	3.55446	0.00023917	0.00477321
Cs7g20030	-2.37934	1.14441	0.000242116	0.00482733
Cs9g07240	-3.64457	-1.2723	0.000243603	0.00485227
Cs5g08850	-1.00388	4.20278	0.000248223	0.00493474
Cs2g21210	-6.33075	-1.33724	0.000251834	0.00499689
Cs5g10180	-1.04908	8.46437	0.000252279	0.0050009
Cs7g13220	-1.03976	7.69269	0.000254517	0.00504042
Cs6g04150	2.42948	3.46229	0.000255412	0.00505327
orange1.1t02607	8.46657	0.443849	0.000260963	0.00514826
Cs8g04030	5.54543	1.04258	0.000265277	0.00522375
orange1.1t00281	1.62197	1.95645	0.00026555	0.00522375
Cs7g15620	7.23672	-0.63878	0.00026596	0.00522682
Cs8g16800	-1.48424	3.72047	0.000266375	0.00522999
Cs6g12470	-1.08772	3.50032	0.000266886	0.00523504
Cs7g08770	-1.54	2.389	0.000267607	0.00523512
Cs4g03850	1.60033	1.5361	0.000267613	0.00523512
Cs5g10150	-1.41222	3.21248	0.000267653	0.00523512
Cs4g18980	1.51588	2.97159	0.000269706	0.00527027
Cs1g13070	-1.35485	4.98284	0.000274472	0.00535324
Cs4g08480	1.27017	2.54726	0.000279311	0.00543733
orange1.1t03576	1.22277	3.63578	0.000280055	0.00544665
Cs8g10340	6.19463	0.813356	0.000283722	0.00550239
Cs6g07400	1.56196	8.66044	0.000284902	0.00552008
Cs1g02690	-3.01013	0.965187	0.000287007	0.00555564
Cs8g19260	-1.25603	3.21755	0.000296119	0.00572127
Cs8g12710	-1.48198	2.45318	0.000297809	0.00574852
Cs6g14130	-1.90108	0.476321	0.000300441	0.00578847
orange1.1t05518	-1.14916	5.76712	0.000302243	0.00581776
Cs5g10530	1.02865	5.25285	0.000305376	0.00586163
Cs5g29880	-3.93788	-0.0811112	0.000308359	0.00590786
Cs8g15250	-1.92015	1.29615	0.00031142	0.00596097
Cs7g28320	-1.08625	3.65797	0.000314986	0.00601805
Cs7g31730	6.13587	1.58699	0.000316308	0.00603769
orange1.1t03347	-1.08072	3.6595	0.000321897	0.00612169
Cs4g19440	-1.04326	3.91097	0.000324615	0.00616769
Cs7g31060	-1.33195	5.18122	0.000325369	0.00617631
Cs1g24840	-1.14153	4.81257	0.000325752	0.0061779
Cs7g12540	-1.18902	7.67817	0.000327873	0.00621239
Cs3g18770	-1.95948	2.60455	0.000329737	0.00624197
Cs2g13110	-1.12154	3.99289	0.000333825	0.00629046
Cs8g18430	-1.1204	5.90908	0.00033497	0.00630049
Cs8g03940	-2.66061	0.0632807	0.000335959	0.00631332
Cs2g13910	-1.25202	8.39357	0.000338632	0.00635777
Cs5g25240	7.99409	0.0153399	0.000340322	0.00638272
orange1.1t03455	-1.70765	6.06584	0.000340682	0.00638272
Cs7g13930	4.3548	2.3187	0.000340891	0.00638272
Cs3g02650	-2.69413	-0.5028	0.000342369	0.00640458
Cs5g13540	-1.11627	6.4889	0.00034597	0.00646019
Cs2g18270	1.11197	3.2516	0.000346726	0.00646829
Cs9g01760	-1.3603	7.81514	0.000349841	0.00650325
Cs5g20360	-1.68338	3.10739	0.000359422	0.00665707
Cs4g12760	1.30223	5.79678	0.000362966	0.00670788
Cs6g16770	3.4027	2.18736	0.000363143	0.00670788
Cs5g03690	-1.6455	1.31489	0.000365188	0.00673195
Cs2g07250	-1.59318	2.93862	0.000369039	0.0067803
Cs5g28640	-1.20154	2.90683	0.000370671	0.00680423
orange1.1t03118	3.66334	0.229008	0.00037223	0.00682677
Cs3g07850	-1.15792	3.53757	0.000373242	0.00683315
Cs4g10250	-1.57715	2.67858	0.000373665	0.00683482
Cs9g02930	4.08194	5.47137	0.000374239	0.00683925
Cs5g09800	-1.0306	3.93646	0.000375809	0.00685605
Cs4g18290	-1.88143	1.73855	0.00037903	0.00689011
Cs7g10110	-1.10903	4.51201	0.00038211	0.00693386
orange1.1t02191	-3.31426	-1.1167	0.000389875	0.00705612
orange1.1t03296	-1.71707	3.9101	0.000391549	0.00707198
Cs1g12670	-1.44171	2.32603	0.000392014	0.00707198
Cs2g29810	2.52353	0.253871	0.000392306	0.00707198
Cs9g19170	-1.08856	7.80643	0.000394636	0.00710482
Cs2g07340	-2.29702	0.823582	0.000397838	0.00714406
orange1.1t01612	-1.72916	1.35165	0.000397958	0.00714406
Cs5g27130	1.11921	3.99164	0.000398689	0.00714406
Cs2g20590	-1.13965	10.3971	0.000403226	0.00720906
Cs5g03680	-2.70904	-0.645277	0.000409822	0.00731441
Cs4g10040	-1.96955	3.27946	0.000410035	0.00731441
Cs1g20330	8.8472	0.797531	0.000412647	0.00734687
orange1.1t05736	-1.19006	2.74989	0.000412717	0.00734687
Cs7g07140	-1.29324	8.97381	0.000413885	0.00736128
Cs6g02190	-2.76639	-0.446676	0.000415549	0.00738451
Cs9g09120	-3.44045	-1.03016	0.000420138	0.00744678
Cs2g04420	-2.04612	0.437499	0.000424157	0.00751155
Cs1g25120	1.41039	7.10926	0.000443491	0.00782702
Cs3g27170	-1.1099	4.54125	0.000444124	0.0078315
Cs2g29700	-1.80703	0.742107	0.000446925	0.00787413
Cs3g23250	-1.5422	4.56872	0.000447659	0.00788034
Cs3g15900	-1.18495	8.49255	0.000449976	0.00791062
Cs1g23500	-1.65765	2.36071	0.000450458	0.00791062
Cs5g35060	4.04725	0.851896	0.000450836	0.00791062
Cs5g18510	-1.42246	2.14034	0.00045429	0.00794316
Cs1g20705	6.10182	-1.51358	0.000459892	0.00802027
Cs2g22100	-1.72899	2.77738	0.000462406	0.00805728
orange1.1t00587	-2.94542	-0.646088	0.000463929	0.00807017
Cs6g16935	-3.02639	-1.03008	0.000466952	0.0081159
Cs1g23040	-4.34209	-1.37219	0.000467362	0.00811618
Cs7g30280	-1.36016	5.7835	0.000468154	0.00812309
Cs4g15760	1.00248	3.54749	0.0004699	0.00813699
Cs2g28760	-2.4099	5.74626	0.000469915	0.00813699
Cs2g09980	1.00492	4.59883	0.000472338	0.00816284
orange1.1t01787	-2.0994	3.08435	0.000472427	0.00816284
Cs3g17400	1.53742	1.33386	0.000476347	0.00822368
Cs3g19070	-2.25782	0.54275	0.000479388	0.00826924
Cs4g01420	-2.94393	-0.849763	0.000480701	0.00828496
Cs7g20870	-1.10862	7.35146	0.000481561	0.00829283
Cs8g15390	1.16781	3.85072	0.000482454	0.00830128
Cs7g04660	-4.17371	-1.48453	0.000485297	0.00834322
Cs2g17860	-1.48183	1.89074	0.000486582	0.00835833
Cs1g16180	-3.02437	-1.03036	0.000488538	0.00838414
Cs9g06130	2.45346	2.43508	0.000489221	0.00838414
Cs8g16920	-1.47453	2.07049	0.000489305	0.00838414
orange1.1t06036	-3.41785	0.454987	0.000493307	0.00843166
Cs4g18420	-2.70134	0.996687	0.000506009	0.00863443
Cs1g03020	2.53064	0.405037	0.000508952	0.00867747
Cs7g30900	-1.2084	5.47575	0.000510997	0.00870513
Cs2g26610	-2.24289	1.34928	0.000512803	0.00872867
Cs2g13920	-1.4573	5.61079	0.000515951	0.00876129
Cs5g10320	-2.40531	0.0460896	0.000519117	0.00879978
Cs2g14940	-1.5259	2.34832	0.000520265	0.00881199
Cs5g26470	-2.08693	1.57625	0.00052186	0.00883174
Cs8g04700	1.60286	3.11123	0.000525214	0.00887392
Cs2g11740	3.07285	-0.591838	0.000529404	0.00893738
Cs2g27040	-2.08941	-0.103251	0.000541915	0.00911125
Cs7g17090	2.46683	1.85007	0.000544659	0.00914247
orange1.1t01937	-1.51293	3.29665	0.000552629	0.00926115
Cs7g32410	1.9729	1.42634	0.000555113	0.00928766
Cs8g05250	-1.55223	1.43975	0.000555763	0.00929098
Cs8g13800	-1.8604	0.447573	0.000560225	0.00935798
Cs8g16430	-2.27656	0.608896	0.00056083	0.0093605
Cs7g02580	1.05805	3.50258	0.000564429	0.00941293
Cs1g20290	5.11469	0.640143	0.000566367	0.00943625
Cs1g12580	-1.28373	4.21106	0.00056838	0.00944823
Cs3g19920	3.39974	-0.794444	0.000570286	0.00946463
Cs5g25850	1.54414	1.60418	0.000581963	0.00961999
Cs6g06670	-1.72609	0.857786	0.000581983	0.00961999
orange1.1t00674	-3.14031	-1.23893	0.000587775	0.00970795
orange1.1t04980	-2.18004	1.74158	0.000597856	0.00984824
orange1.1t02599	-1.98994	1.18049	0.000599965	0.00986184
Cs3g17890	-2.20843	2.75581	0.000604471	0.00992007
Cs5g27290	-1.58224	1.75384	0.000606191	0.00993415
Cs1g23870	-2.24	-0.163351	0.000606294	0.00993415
orange1.1t02946	1.73616	2.81623	0.000609181	0.00997352
Cs2g07550	1.35375	2.63337	0.000616879	0.0100724
Cs2g22570	-4.05642	-1.56142	0.000617177	0.0100724
Cs7g03570	-1.39596	7.10612	0.000621487	0.0101267
Cs1g04080	1.06543	3.11714	0.00063798	0.010379
Cs3g17180	-2.74312	-0.622952	0.000646814	0.0104896
Cs4g07800	-1.81603	1.16374	0.000658656	0.0106648
Cs4g16680	-1.22638	2.95342	0.000660883	0.0106841
Cs3g16370	-1.65494	2.00259	0.000661426	0.0106845
Cs1g23490	-4.05501	-1.56151	0.000662482	0.0106932
Cs6g22390	-2.85174	-0.540898	0.00066682	0.010739
Cs5g02760	-1.75704	4.53891	0.000666884	0.010739
Cs1g06220	-1.06081	3.40196	0.000669924	0.0107795
orange1.1t04913	-2.2346	-0.256261	0.000671077	0.0107896
Cs7g26250	-3.43554	-1.03152	0.00067273	0.0108078
Cs4g12260	1.71316	1.72968	0.000677379	0.0108655
orange1.1t00464	-1.1133	7.06323	0.000685116	0.0109725
orange1.1t02050	-1.50684	3.68359	0.000687708	0.0109969
Cs2g12990	-1.05676	3.83092	0.000691665	0.0110516
Cs5g12710	-1.01205	3.94641	0.000699493	0.0111594
Cs6g09610	-1.06832	5.76805	0.000708751	0.0112896
Cs6g20470	-1.29819	6.57475	0.000712803	0.0113344
orange1.1t02418	-1.00552	4.09078	0.000713463	0.0113344
Cs2g13180	-2.1684	3.50986	0.000713767	0.0113344
Cs5g24240	-1.57292	1.79232	0.000714524	0.0113377
orange1.1t05897	-2.66386	1.28834	0.000721199	0.011426
orange1.1t04356	1.23784	3.09764	0.000722312	0.0114348
Cs1g20300	6.31892	1.77413	0.000724658	0.0114632
Cs3g12230	-1.0987	8.12114	0.000726013	0.0114707
Cs1g21390	1.48664	3.03211	0.000726248	0.0114707
orange1.1t04303	-1.93091	0.18657	0.000740152	0.0116635
Cs8g15610	-1.59717	1.80971	0.000743763	0.0117025
Cs5g08030	-1.69769	2.3611	0.00075274	0.0117987
Cs1g20490	-1.43368	3.48529	0.000755308	0.011828
Cs1g01280	1.27642	2.34167	0.000759191	0.0118677
Cs5g16210	5.5483	-1.86776	0.000760344	0.0118727
Cs7g16560	-5.67938	-1.7752	0.00077358	0.012061
Cs4g11160	1.06531	4.18126	0.000775477	0.0120815
Cs5g11770	-3.54939	-1.3376	0.000784777	0.0122079
Cs4g19560	-1.45675	3.19756	0.000786541	0.0122109
Cs3g16620	-1.90234	1.04984	0.000786745	0.0122109
Cs5g08870	7.21085	-0.660144	0.000788037	0.0122154
Cs2g04650	-2.03066	0.373004	0.000790039	0.0122343
Cs3g23530	-2.7613	0.139273	0.000806601	0.012444
Cs6g09780	-1.45527	5.46421	0.000813019	0.0125336
Cs8g04530	-1.34172	3.45175	0.000813945	0.0125385
Cs5g18040	-2.46867	1.21276	0.000815519	0.0125534
Cs8g17810	-1.85814	5.42962	0.000816643	0.0125613
Cs2g28420	-2.82624	-0.732026	0.000826398	0.0126761
Cs6g09810	1.15915	3.46842	0.000826567	0.0126761
Cs5g19600	-2.67009	-0.848138	0.000827249	0.0126771
Cs2g03340	-2.75386	3.07694	0.000832395	0.012737
Cs3g26220	-2.92185	2.93477	0.000837367	0.0128036
Cs7g24730	1.20731	5.28979	0.000847505	0.0129452
Cs4g06180	-2.06432	1.80446	0.000847889	0.0129452
Cs7g30820	1.13485	3.71473	0.00085318	0.0130074
Cs1g13590	-5.42931	-1.92344	0.000859142	0.0130879
Cs7g08190	-1.15563	3.08616	0.000861979	0.0131214
Cs2g31130	-2.06772	1.10809	0.000867457	0.0131951
Cs3g25410	-1.11391	5.62025	0.000873356	0.0132652
Cs5g21860	2.27649	4.7287	0.000874838	0.0132779
Cs7g03170	-1.0238	5.23569	0.000876404	0.0132919
Cs6g15770	-1.82569	3.40803	0.000887831	0.0134257
Cs1g23200	1.00437	5.91512	0.000894541	0.0135073
Cs6g15680	1.23123	3.19911	0.000898299	0.0135541
Cs7g23120	-1.51625	2.58664	0.000899859	0.0135567
Cs1g21860	-3.54319	-1.3401	0.000900445	0.0135567
Cs1g22210	-3.34203	-0.80104	0.000910895	0.013694
orange1.1t00542	-3.09691	-0.0588231	0.000914087	0.013722
Cs9g02920	2.53228	2.98306	0.000921167	0.0138182
Cs1g16790	-1.9934	0.766463	0.000926113	0.0138722
Cs3g27320	-1.06055	5.55015	0.000932312	0.0139447
Cs2g25130	1.81769	0.853922	0.000933885	0.0139581
orange1.1t01713	-1.13501	6.41152	0.000938405	0.0140155
Cs8g08710	-1.21304	2.90091	0.0009515	0.0141716
orange1.1t04701	2.91968	-0.702343	0.000951606	0.0141716
Cs7g11830	2.79517	-0.794127	0.00096255	0.0143218
Cs2g31260	-1.15975	4.80332	0.000974647	0.0144833
Cs9g06160	-2.48057	2.41183	0.000978162	0.014525
orange1.1t04360	-1.6999	0.806658	0.000980057	0.0145427
Cs1g21400	-1.19963	2.79927	0.000983761	0.0145783
Cs2g21480	-2.16314	-0.307139	0.00099131	0.0146328
Cs7g19210	-1.72493	2.07786	0.000992437	0.0146328
Cs9g08660	8.17778	0.180572	0.000992904	0.0146328
Cs4g18380	-1.12672	5.10095	0.000994383	0.0146328
Cs6g19380	-1.01592	6.96733	0.00099463	0.0146328
Cs1g23170	1.18625	3.97604	0.000999152	0.0146675
Cs7g01980	-3.26753	-0.408994	0.00101945	0.0149442
Cs6g07360	-1.07135	8.60186	0.00102722	0.015028
Cs5g28650	1.52976	1.46641	0.00102736	0.015028
Cs1g05460	-1.6419	2.83845	0.00102935	0.0150421
Cs1g07100	-3.19042	-1.2073	0.00103442	0.0150983
orange1.1t00485	-1.05677	5.15724	0.00103509	0.0150983
orange1.1t04750	-3.54023	-0.952736	0.00104087	0.0151578
Cs7g01390	-1.04093	4.89402	0.00104138	0.0151578
Cs7g13190	-6.4209	-1.27087	0.00104266	0.0151657
Cs4g03660	1.12997	4.12616	0.00104658	0.0152119
Cs2g25720	5.54397	1.55959	0.0010553	0.0153171
Cs8g16140	-1.09956	4.5721	0.00106347	0.0154248
Cs3g13090	-2.51927	0.0467362	0.0010679	0.0154672
Cs5g31960	1.14581	3.09069	0.00109811	0.0158713
orange1.1t01984	1.05648	3.6429	0.00110428	0.0159493
Cs4g06650	-1.45025	6.40456	0.00112529	0.0161733
Cs7g02340	-1.07106	4.75573	0.00113399	0.0162677
Cs1g15670	-1.00135	6.89661	0.00113422	0.0162677
Cs8g09350	-3.5557	-0.64256	0.00113787	0.0163086
Cs5g09980	-1.5024	1.40443	0.00113873	0.0163097
Cs2g15220	1.0084	3.25977	0.00115268	0.0164866
Cs8g02530	-3.32874	-1.48237	0.00115879	0.0165624
orange1.1t00850	-1.18989	4.14187	0.00116388	0.0166236
Cs2g15850	-1.50705	2.14515	0.00116768	0.0166664
Cs7g29020	-1.11138	4.27659	0.00116902	0.0166739
Cs6g15130	-1.12137	6.65598	0.00118195	0.0168466
Cs2g01990	4.09401	0.741732	0.00119124	0.0169557
Cs1g26060	-3.99616	-1.60171	0.00120635	0.0171351
Cs5g09950	-3.99372	-1.60149	0.00120898	0.0171607
Cs9g07420	-1.15835	4.23742	0.00121511	0.017224
orange1.1t00510	-1.6561	1.72377	0.001227	0.0173305
Cs5g28220	3.05373	0.519612	0.00122767	0.0173305
Cs4g03200	-1.21024	6.32109	0.00123419	0.0174105
Cs2g21400	-2.37451	-0.732357	0.00123777	0.0174491
Cs7g10510	-3.23196	0.525041	0.00124684	0.0175649
Cs2g15440	-3.23117	-1.17623	0.00125671	0.0176772
Cs3g02310	-4.11426	-1.52325	0.00125701	0.0176772
Cs2g28150	-1.5792	1.69909	0.00126973	0.0177939
Cs1g21370	-1.70356	1.96541	0.00127001	0.0177939
orange1.1t01694	-1.64767	6.06888	0.00127113	0.0177975
Cs6g16450	-1.95911	1.49937	0.00127622	0.0178566
Cs5g31020	7.99346	0.015065	0.00127729	0.0178595
Cs9g14040	-1.53383	4.88627	0.00128593	0.0179437
orange1.1t05194	4.96881	-0.942594	0.00128878	0.0179714
Cs5g01380	-4.23606	-1.44435	0.00129992	0.0181042
orange1.1t04594	-1.50812	5.13922	0.00130006	0.0181042
Cs3g12600	-2.63824	0.134433	0.00131336	0.0182647
orange1.1t03701	-1.53151	1.40612	0.00131829	0.0182961
Cs5g29920	-1.5764	3.38776	0.0013209	0.0183201
Cs5g33380	-2.1032	1.07552	0.00134019	0.0185656
Cs2g16140	-1.79859	1.06178	0.00134041	0.0185656
Cs9g12530	3.15571	-1.26495	0.00134154	0.0185687
orange1.1t02079	3.73222	0.910737	0.00134289	0.0185749
orange1.1t05115	-3.92895	-1.64373	0.00136351	0.0188096
Cs2g16180	-2.3212	-0.195678	0.00136449	0.0188106
Cs7g21340	-1.21648	4.08899	0.00136733	0.0188371
Cs6g08500	1.56089	5.87264	0.00137299	0.0189025
orange1.1t05946	2.40555	0.504429	0.0013742	0.0189065
Cs7g06320	-1.05829	6.79124	0.00137789	0.0189446
Cs2g22770	2.46874	0.557242	0.0013807	0.0189706
Cs1g06810	-1.30703	2.81401	0.0013827	0.0189854
Cs5g19950	-2.55605	-0.753296	0.00138419	0.0189932
Cs5g01530	5.56958	1.78999	0.00138731	0.0190145
Cs5g20500	-1.15506	3.07646	0.00138759	0.0190145
Cs9g14510	-1.7433	2.24006	0.00139298	0.0190757
Cs8g20170	-1.06866	4.56973	0.00140046	0.0191399
Cs8g17160	1.32024	7.78077	0.0014042	0.0191783
Cs7g17750	6.39234	-1.30035	0.00143409	0.0195227
Cs1g22530	-3.85723	-1.68685	0.00143434	0.0195227
Cs5g33920	-2.27283	-0.8004	0.0014351	0.0195227
Cs2g29820	2.24056	-0.201081	0.00144303	0.0196176
Cs5g11390	-5.59575	-1.82403	0.00144941	0.0196913
Cs2g01720	7.89974	-0.068233	0.00145798	0.0197817
Cs7g27080	-1.45204	1.62375	0.00146697	0.0198775
Cs8g18310	-2.0915	-0.104656	0.00147263	0.019941
Cs8g08810	-5.33784	-1.97586	0.00148087	0.0200263
orange1.1t01756	-3.86423	-1.6855	0.0014934	0.0201825
Cs1g22360	-1.18406	2.197	0.00149517	0.0201931
Cs9g08460	-1.21318	4.79062	0.00150171	0.0202682
Cs8g06060	1.11785	2.69911	0.00150477	0.0202961
Cs5g10480	-3.3262	0.381608	0.0015099	0.020352
Cs6g05320	6.35733	1.4389	0.00151246	0.0203732
Cs1g16730	-1.20673	4.01338	0.00151407	0.0203812
Cs5g02310	1.28993	2.52606	0.00152861	0.0205236
Cs3g20680	5.21294	-0.748167	0.0015442	0.0206925
Cs6g09880	-1.0491	3.10746	0.00154775	0.0207266
Cs3g15780	-1.11829	6.63578	0.00155659	0.0208034
Cs1g09550	1.08548	4.0858	0.00155787	0.0208034
Cs4g10500	-1.20034	3.06746	0.00156481	0.0208601
Cs3g13830	-1.33875	3.01796	0.00157225	0.0209322
orange1.1t01362	-2.19007	0.493679	0.00157379	0.0209391
Cs4g10570	-1.16132	2.49975	0.00158032	0.0210124
Cs3g14590	1.24475	2.27309	0.00159474	0.0211905
Cs2g10210	3.78525	0.741309	0.00159645	0.0211995
Cs2g13700	-1.60292	6.71538	0.00160445	0.0212921
Cs2g30830	-3.87591	-0.708154	0.00161326	0.0213952
Cs2g06910	2.70876	-1.05219	0.00163129	0.0215926
Cs2g22010	3.47263	3.04694	0.0016407	0.0216947
Cs5g19320	5.39162	0.540733	0.00164153	0.0216947
Cs5g13970	1.90579	5.86673	0.00164326	0.0216947
Cs5g08370	-3.08888	0.190937	0.00164432	0.0216947
Cs7g24020	-2.07359	0.0324054	0.00164669	0.0216988
Cs8g17200	-1.18422	4.34718	0.00164818	0.0217045
Cs6g02710	-1.43618	3.54334	0.00165272	0.0217505
Cs4g17320	-1.55352	2.97035	0.00166043	0.0217961
Cs7g32120	-2.96927	0.299004	0.00167254	0.0219224
Cs5g15800	-1.56501	0.925119	0.00167324	0.0219224
Cs2g16900	-1.09718	8.39836	0.00168272	0.0220187
Cs8g04720	-1.54228	1.39337	0.00168431	0.0220255
Cs3g24360	-1.47619	3.02048	0.001689	0.0220587
Cs6g19790	-2.38677	-0.872949	0.00172432	0.022463
orange1.1t03749	-1.13148	3.09614	0.00172794	0.0224961
Cs4g01110	3.28906	-1.17085	0.00173545	0.0225795
Cs5g19260	-1.40089	1.27332	0.00174334	0.0226679
Cs2g14800	7.15681	-0.704233	0.00175639	0.0228087
Cs1g22820	7.76449	-0.187347	0.00175996	0.0228406
Cs5g17380	2.64164	0.559872	0.0017669	0.0228731
Cs5g23520	-2.75959	-1.20848	0.00178375	0.0230768
orange1.1t01821	-3.27527	-1.14496	0.00179142	0.0231469
Cs2g19970	-1.44239	6.01294	0.0018211	0.0234862
Cs2g29710	-2.44916	0.937968	0.00182976	0.0235632
Cs2g31250	-1.36836	3.70412	0.00183051	0.0235632
Cs1g14893	-1.22777	2.96856	0.00183906	0.0236289
Cs6g15150	-1.50218	5.45847	0.00184338	0.0236697
orange1.1t00399	2.30207	-0.816606	0.00184516	0.0236763
Cs2g07740	1.51749	2.22439	0.00184619	0.0236763
orange1.1t00508	-1.04386	3.60353	0.00185063	0.0237102
Cs6g15710	-1.31772	2.144	0.00185114	0.0237102
Cs8g09390	1.88671	3.44311	0.00185283	0.0237171
Cs2g01770	1.13079	5.0839	0.00186225	0.0238229
Cs5g04810	-1.91081	2.20497	0.00186814	0.0238686
Cs7g01400	-1.18605	8.8902	0.00187571	0.0239505
orange1.1t01260	1.18245	3.4216	0.00187727	0.0239556
Cs2g01740	1.05413	3.4612	0.00188336	0.0240083
orange1.1t02746	1.3453	1.46324	0.00188373	0.0240083
Cs2g22610	-2.93361	-1.37356	0.00189561	0.0241298
orange1.1t05429	-1.94065	1.94471	0.00190481	0.0242319
Cs5g31250	-5.33638	-1.97614	0.00194156	0.0246279
Cs5g03240	-1.54924	2.58021	0.00194782	0.0246646
Cs3g19580	-1.77956	0.828427	0.00195074	0.0246646
Cs2g01560	-1.42738	1.33094	0.00195218	0.0246669
Cs4g17050	-2.11898	1.04749	0.00195434	0.0246791
Cs2g28530	2.41216	-0.890772	0.00196894	0.024833
orange1.1t03342	-4.00071	-1.6	0.00197439	0.024856
Cs3g02640	-1.28683	2.12348	0.00199158	0.0250114
Cs3g25930	-1.9129	0.0505424	0.00202167	0.0253274
Cs9g07210	-3.07844	0.811755	0.0020339	0.0254342
Cs5g19840	-1.54774	3.54771	0.00205027	0.0255768
Cs4g17960	-1.69115	6.2151	0.00205354	0.0256022
Cs9g14710	1.71113	7.10688	0.00205533	0.025609
Cs6g05990	-1.30075	6.70788	0.0020608	0.0256615
Cs5g13070	1.1335	3.57121	0.00206858	0.0257428
Cs6g07830	-1.06143	9.71327	0.0020775	0.0258227
Cs3g20890	-1.12041	3.10507	0.00208546	0.025906
orange1.1t01623	-4.00124	-1.60048	0.00209997	0.0259969
Cs6g18320	-1.61997	0.676775	0.00210005	0.0259969
Cs4g08990	-1.05946	5.54602	0.00210035	0.0259969
Cs3g12020	5.46208	-1.91859	0.00212865	0.0262998
Cs3g03045	-3.06162	0.280004	0.0021309	0.0263008
orange1.1t01609	-1.49348	1.06132	0.00214424	0.0264263
Cs5g02440	-1.22458	7.73198	0.00214671	0.0264278
Cs2g23260	-2.69666	-0.501678	0.00216878	0.0265882
Cs1g18540	-1.42923	8.34833	0.00217301	0.0266242
Cs5g21220	2.49895	-0.680409	0.00217864	0.0266435
Cs7g16760	-1.10537	5.58489	0.00217936	0.0266435
orange1.1t03684	1.47355	2.84939	0.00217976	0.0266435
Cs5g31140	-2.77181	0.247868	0.00218247	0.0266608
orange1.1t05275	1.72396	0.447816	0.00219731	0.0267627
Cs5g15220	-1.86241	-0.117449	0.00220817	0.0268632
Cs4g06340	1.00322	4.35495	0.00222497	0.0270516
Cs5g20520	-1.24334	7.36362	0.0022334	0.0271222
Cs2g11380	-1.17107	3.01646	0.00225115	0.0273055
orange1.1t03175	-1.28891	3.75709	0.00226204	0.027373
orange1.1t01955	-2.05329	0.631	0.00230349	0.0278419
Cs7g30410	6.04386	1.51256	0.00232568	0.0280279
Cs9g07530	-2.04436	1.99548	0.00234473	0.0281751
Cs7g10380	-1.41773	1.93883	0.00237876	0.0285213
Cs8g17940	1.00735	2.84177	0.00237908	0.0285213
Cs3g03620	1.87699	2.95503	0.00239267	0.0286509
Cs8g13710	-1.31373	4.45873	0.00239619	0.0286763
Cs2g03330	-1.50283	3.2321	0.00240333	0.028745
Cs5g01460	-5.43787	-1.92157	0.00241291	0.0288303
Cs7g31620	-2.77221	-0.975963	0.00241325	0.0288303
orange1.1t01383	3.39363	-1.47607	0.00242628	0.0289523
Cs4g07370	-1.19961	2.55644	0.00243743	0.0290349
Cs5g31010	5.58606	1.36144	0.00244405	0.0290969
Cs1g23590	-1.51422	2.92588	0.00246651	0.0293135
Cs2g29720	-2.55881	0.827525	0.0024783	0.0294027
Cs9g06370	-1.03527	3.28766	0.00249562	0.0295855
Cs8g01550	-2.91158	-0.875879	0.00249658	0.0295855
Cs1g26270	-5.14195	-2.08549	0.00250179	0.0296302
Cs9g09650	3.66809	0.636224	0.00250604	0.0296635
Cs9g17780	-1.33342	1.36431	0.00251549	0.0297582
Cs2g15790	-1.78506	0.137972	0.0025407	0.030022
orange1.1t03574	5.17379	-2.0817	0.00256919	0.0302304
orange1.1t02225	-6.07289	-1.51955	0.00257002	0.0302304
Cs6g21120	-6.07289	-1.51955	0.00257302	0.0302304
Cs1g01260	1.21416	2.16354	0.00258625	0.0303512
Cs9g04040	-1.75954	0.279913	0.00261202	0.0305839
Cs5g15190	1.09305	7.43924	0.00262563	0.0307084
Cs5g05240	-1.04354	3.10225	0.00263972	0.0308557
Cs4g19300	1.32767	2.79564	0.00264875	0.0309086
orange1.1t03874	-1.00105	2.89719	0.00267011	0.031105
orange1.1t05763	-2.52164	-0.948705	0.00267638	0.0311603
Cs2g13280	-1.31335	3.27686	0.00268585	0.031253
Cs1g13900	-1.41538	1.40053	0.00270001	0.0313823
Cs7g07990	-1.09815	6.56579	0.00271693	0.0315433
Cs1g09170	-2.86248	-1.14525	0.0027337	0.0317201
Cs3g03350	-2.4899	-0.799493	0.0027388	0.0317614
Cs7g16680	-3.08365	-1.27328	0.00275886	0.0319761
Cs2g22660	3.05686	4.06743	0.00276362	0.0319772
orange1.1t04768	-1.26132	2.06171	0.00276958	0.0320282
Cs5g15150	-1.32574	2.30806	0.00278192	0.0321349
Cs8g04300	-2.1833	1.16566	0.00278863	0.0321637
Cs6g06610	-1.04146	2.66489	0.00283273	0.0325756
Cs6g02180	-1.30136	3.29261	0.00283761	0.0326029
Cs7g06440	-2.35579	-1.05924	0.00283827	0.0326029
Cs1g19660	1.00469	3.20885	0.00284444	0.0326556
Cs5g26630	-2.16842	-0.503446	0.0028513	0.0327161
Cs1g09040	-2.48477	-0.802988	0.0028601	0.0327805
Cs9g02980	-1.61515	0.677174	0.00288336	0.0329921
Cs1g18230	-2.3226	0.537856	0.00288612	0.0330053
Cs6g14100	-3.55284	-0.949888	0.00289602	0.0331002
Cs2g27640	-1.59401	1.47324	0.00291318	0.0332175
Cs8g02380	-1.38634	1.32319	0.00293148	0.0333942
Cs3g26720	1.76286	0.513624	0.00294068	0.0334806
Cs7g22420	-1.09341	2.86976	0.00298452	0.0339069
Cs5g19220	-1.28805	1.87298	0.00298472	0.0339069
Cs3g26900	-3.35152	-0.160169	0.00299163	0.0339667
Cs1g15390	-1.42563	3.23962	0.00299584	0.0339958
Cs3g26140	-3.63244	-1.8227	0.00299792	0.0340006
Cs8g09070	-2.71417	-0.100891	0.00306284	0.0346035
Cs7g11190	-1.62191	0.936031	0.00307497	0.0347026
Cs9g14470	-1.01551	3.08601	0.00308691	0.0347611
Cs5g27560	-1.11444	4.86995	0.00309667	0.0348329
Cs7g08110	-1.87016	1.47649	0.00310859	0.0349288
Cs5g02110	-1.64877	1.22255	0.00311273	0.0349372
Cs7g10240	1.39827	2.17029	0.0031312	0.0350872
orange1.1t01250	7.38304	-0.526691	0.00313653	0.0351277
Cs8g05230	-2.68792	-1.02916	0.00315264	0.0352699
Cs7g22760	1.15442	2.00814	0.00315828	0.0353138
Cs2g13670	-1.43231	3.339	0.0031924	0.0356712
Cs7g21580	-1.06103	3.36065	0.00319838	0.0356712
orange1.1t02242	2.37776	0.352925	0.0031989	0.0356712
Cs6g02700	-2.01487	4.47184	0.00321879	0.0358347
Cs5g08200	-1.0892	2.84356	0.00322593	0.0358948
Cs7g29570	-2.01812	2.79965	0.0032367	0.0359952
orange1.1t01769	-1.18217	8.30518	0.00324134	0.0360174
Cs3g10680	-1.63196	0.541033	0.00324557	0.0360174
orange1.1t01831	1.4094	1.01787	0.00327573	0.0362726
Cs1g02160	3.26519	-1.55564	0.00330121	0.036535
Cs2g14360	-1.6332	3.0625	0.00331169	0.0366313
Cs7g31430	-1.6652	5.32697	0.00333291	0.0368265
Cs8g16110	-2.04399	-0.13459	0.00337406	0.0371616
Cs1g19150	-3.53194	-0.665614	0.00339627	0.0373312
Cs6g07850	-3.13723	-1.60151	0.00339675	0.0373312
Cs3g20300	-1.26537	3.28387	0.00339693	0.0373312
Cs1g17430	-3.50551	-0.979084	0.00341069	0.0374292
Cs2g10530	-1.03887	4.28429	0.00341636	0.0374672
Cs7g09870	1.54423	0.817277	0.00344077	0.0376947
Cs4g07320	7.26045	-0.618206	0.00347207	0.0379781
Cs2g08390	-1.20818	2.06979	0.00350169	0.0382198
Cs1g16023	3.90224	-0.404522	0.00352702	0.0384506
Cs2g31400	3.0471	-1.33339	0.0035349	0.0385007
Cs9g09780	2.81274	0.329695	0.00355411	0.0386895
Cs3g11700	-1.80716	1.39196	0.00360888	0.0391615
Cs5g09600	-1.99854	0.114275	0.00362493	0.0393149
Cs7g09020	-1.23902	2.52042	0.00367669	0.0397925
Cs4g10770	-1.19119	1.99033	0.00368484	0.0398598
Cs8g18610	-3.16858	-0.925744	0.00370771	0.040044
Cs4g10050	-3.6273	-1.82368	0.00374328	0.0403624
Cs7g04750	-2.74078	-0.328164	0.00374503	0.0403624
Cs6g19070	-1.01163	4.58043	0.00378189	0.0407171
Cs1g17550	1.08166	2.82337	0.00379608	0.0408485
Cs2g19880	-1.26162	1.93337	0.00382676	0.0410927
orange1.1t00204	-1.96208	-0.447714	0.00384035	0.0411987
Cs1g16650	2.37454	0.223265	0.00384062	0.0411987
Cs3g07720	-5.75515	-1.72895	0.00384675	0.0412429
Cs1g24010	-1.08008	4.35386	0.00385143	0.0412717
orange1.1t03484	1.4974	1.24363	0.00387628	0.0414516
Cs4g08710	-2.69648	-0.229055	0.00390133	0.0416331
Cs7g20890	-1.1752	2.45098	0.00390338	0.0416333
Cs2g24740	1.05322	3.22164	0.0039209	0.0417769
orange1.1t02029	-1.09024	3.24839	0.0039397	0.0419413
orange1.1t02879	-2.20254	0.919671	0.00402676	0.0427061
Cs5g10270	-2.27756	-0.227549	0.00407581	0.0431596
Cs7g07640	-1.18941	9.18221	0.00409021	0.0432898
Cs5g31030	3.3652	1.03557	0.00412571	0.0436207
Cs6g07450	6.0873	-1.51708	0.00419919	0.0443066
Cs8g02650	-1.94527	0.196517	0.00423526	0.0445958
Cs6g18360	-1.6461	5.73026	0.00423834	0.0446054
Cs5g20440	1.2637	1.24274	0.00426166	0.0448051
Cs5g20410	1.34807	0.97732	0.00430255	0.0452119
Cs4g17780	1.36192	1.47684	0.00433343	0.0454205
Cs5g28460	-2.1984	-0.848035	0.00435863	0.0455919
Cs4g03145	-2.07405	-0.464287	0.00436592	0.0456449
Cs4g06150	6.00212	-0.0826521	0.00437968	0.0457655
orange1.1t00539	-2.92614	-0.191664	0.00438936	0.0458434
Cs7g03100	1.8192	-0.331658	0.00439713	0.0459014
Cs8g15780	3.56422	-0.970712	0.00441449	0.0460592
orange1.1t03841	-2.0051	-0.16539	0.00443605	0.0462607
Cs3g02020	1.32407	3.7525	0.00446592	0.0465486
orange1.1t03623	-3.70853	-1.77715	0.0044867	0.0467179
Cs8g10380	5.30708	0.0011921	0.00449876	0.0467962
Cs5g05820	-2.04858	-0.483218	0.00450447	0.046809
Cs8g04860	-1.11215	4.4931	0.00450454	0.046809
Cs3g19260	-1.49713	1.04318	0.0045184	0.0469294
Cs2g07180	-5.03096	-2.14406	0.00452693	0.0469706
Cs8g05740	-1.4067	1.90847	0.00454409	0.0471012
orange1.1t01652	-1.21022	2.47613	0.00456831	0.0472809
Cs2g10430	-1.40475	1.1457	0.00460281	0.0475662
Cs9g09620	-1.12494	2.81327	0.00461273	0.047621
Cs8g14510	-5.02807	-2.14465	0.00468224	0.0482418
Cs9g18250	-1.408	1.39902	0.00471215	0.0484531
Cs8g08620	2.94805	-1.40282	0.00473498	0.0486635
Cs1g08590	-2.27162	-0.326165	0.00474161	0.0487074
orange1.1t03594	-1.57388	0.33495	0.00475558	0.0488265
Cs2g13320	-1.41108	4.35189	0.00476049	0.0488383
orange1.1t04745	-1.51947	0.162672	0.0048058	0.0491705
Cs5g31460	5.54708	-1.86789	0.00481002	0.0491893
Cs2g20410	-1.30663	2.14692	0.00482207	0.049288
Cs7g10570	-1.10919	5.93382	0.00485164	0.0495657
Cs7g15050	-1.03549	3.28885	0.00487183	0.0497226
Cs5g09050	-1.33057	2.34659	0.00488171	0.0497988

## Sheet: 280 WTvsMT
Gene_ID	logFC	logCPM	PValue	FDR
Cs4g18090	6.14054	9.04199	5.1814e-204	1.05934e-199
Cs3g23440	4.4224	6.78377	5.85194e-137	5.98214e-133
Cs3g04540	9.10957	5.99074	1.50274e-110	1.02411e-106
Cs6g07400	6.41551	7.85326	1.09396e-101	5.59151e-98
Cs6g08500	7.1121	5.55431	3.65127e-92	1.493e-88
orange1.1t00214	4.16237	6.34343	4.0869e-84	1.39261e-80
Cs9g17380	5.57336	9.59782	5.73254e-74	1.67431e-70
Cs7g27010	3.28018	5.73924	1.06376e-69	2.71856e-66
Cs9g14590	3.77425	4.46414	1.67508e-67	3.80523e-64
orange1.1t01192	6.03089	3.78061	8.3518e-64	1.70752e-60
Cs2g03270	5.3949	5.29892	8.34235e-62	1.55054e-58
Cs7g08730	-3.10465	4.59805	3.7356e-61	6.36453e-58
orange1.1t02977	6.11261	3.14791	3.06628e-60	4.82231e-57
Cs9g02570	3.95165	6.66798	1.69415e-59	2.47406e-56
Cs2g21470	-3.33701	5.24728	2.97898e-58	4.06035e-55
Cs3g16430	3.5086	5.59533	7.05241e-58	9.01166e-55
Cs5g16860	4.24738	7.38613	3.75653e-57	4.51778e-54
Cs2g04110	9.65756	3.50292	5.99339e-57	6.80749e-54
Cs4g14090	2.41211	7.0833	4.0162e-56	4.32164e-53
Cs7g16980	-2.70591	4.80341	5.20401e-56	5.3198e-53
Cs3g12130	3.59697	4.73162	2.3231e-53	2.26171e-50
Cs8g19720	3.65138	4.109	2.97274e-53	2.76262e-50
Cs9g14480	6.74092	3.02405	1.7905e-51	1.5916e-48
orange1.1t02041	2.59512	7.99624	4.22251e-51	3.59705e-48
Cs9g15830	-5.73533	2.68625	7.24594e-51	5.92573e-48
orange1.1t03576	2.66153	6.49416	3.20021e-50	2.51647e-47
Cs6g11990	2.10072	8.54722	1.88318e-47	1.42598e-44
Cs8g15390	3.06735	3.98596	2.57216e-46	1.87814e-43
Cs5g25740	3.58455	6.03763	4.46171e-46	3.1455e-43
orange1.1t00634	4.04825	8.88455	1.06067e-45	7.22844e-43
orange1.1t03603	3.17843	6.57674	2.38846e-45	1.57523e-42
Cs1g16430	2.45632	6.65674	2.53205e-45	1.61774e-42
orange1.1t03602	3.38493	5.67081	7.03373e-45	4.35772e-42
orange1.1t01705	-7.15529	2.34303	1.0929e-44	6.57186e-42
Cs6g05280	2.33029	6.54898	1.22757e-44	7.17074e-42
Cs7g24730	2.44937	4.84136	5.11691e-44	2.90598e-41
Cs3g01585	4.93888	8.97947	2.7894e-43	1.54133e-40
Cs7g32150	-2.92855	4.26777	6.64248e-43	3.57383e-40
Cs5g12900	2.45761	8.56435	1.09048e-42	5.71661e-40
Cs5g18500	-3.06133	4.83013	1.27494e-42	6.51656e-40
orange1.1t03042	2.62192	5.22103	2.37494e-42	1.18428e-39
Cs2g07170	3.76406	5.84252	3.40782e-42	1.65888e-39
orange1.1t03773	2.33379	5.10796	1.7387e-41	8.26694e-39
Cs5g05650	2.36386	8.6972	4.00994e-41	1.86326e-38
orange1.1t04489	3.34236	6.21536	4.22921e-41	1.92147e-38
Cs7g31410	3.0259	4.2651	4.55391e-40	2.02402e-37
orange1.1t00635	1.85271	7.18304	1.02473e-39	4.45758e-37
Cs5g30790	7.36693	5.71851	1.64728e-39	7.01637e-37
Cs6g22150	-3.60549	4.48486	2.1258e-39	8.86977e-37
Cs5g30850	1.8443	8.15517	3.27563e-39	1.33941e-36
Cs8g09780	2.24909	9.50254	3.86781e-38	1.55054e-35
Cs5g27570	2.10654	9.67118	1.50675e-37	5.92413e-35
Cs5g33540	3.13539	4.3625	2.85223e-37	1.10026e-34
Cs3g10430	3.52452	4.18481	5.59624e-37	2.1188e-34
Cs7g13310	-2.15586	6.8733	2.20331e-36	8.1903e-34
Cs5g10530	2.49959	5.42679	6.40053e-36	2.33676e-33
Cs8g05410	2.38847	8.25728	2.35576e-35	8.44975e-33
Cs7g12440	3.01185	4.59056	5.07656e-35	1.78949e-32
Cs2g21220	-2.09418	7.28059	1.57665e-34	5.46348e-32
Cs1g06320	-1.79546	7.75831	1.77478e-34	6.04758e-32
Cs4g03580	-2.23795	5.66726	2.34373e-34	7.85533e-32
Cs5g10550	2.27634	10.9365	8.53854e-34	2.81565e-31
Cs8g17160	2.00599	8.06304	2.23618e-33	7.25695e-31
Cs2g07740	3.119	3.64936	2.43198e-33	7.76903e-31
Cs5g19020	4.32204	7.03878	3.31565e-33	1.0429e-30
Cs3g27360	2.11692	5.82536	3.65626e-33	1.13261e-30
Cs6g13560	-2.41496	4.55251	7.16979e-33	2.18786e-30
orange1.1t01245	2.07293	7.80818	9.5962e-33	2.88521e-30
Cs9g01750	4.00007	2.81311	1.21143e-32	3.58952e-30
orange1.1t02831	1.85199	6.16992	3.24976e-32	9.49163e-30
Cs3g09120	-2.55806	6.01208	6.23128e-32	1.79435e-29
orange1.1t01707	-2.12554	7.52459	6.56066e-32	1.86295e-29
orange1.1t02319	2.22948	5.0694	6.65808e-32	1.86472e-29
Cs8g14690	-4.48526	2.45403	6.76478e-32	1.869e-29
orange1.1t00386	2.17095	7.83636	6.99158e-32	1.90591e-29
Cs8g13740	3.61539	9.08907	1.1405e-31	3.06809e-29
Cs3g21160	2.04577	8.44592	1.18301e-31	3.14113e-29
Cs9g06270	1.56947	9.09213	1.3583e-31	3.56031e-29
Cs1g25280	-1.95959	6.19644	1.54003e-31	3.96904e-29
Cs7g13200	-3.59301	6.19949	1.55306e-31	3.96904e-29
Cs5g10040	-1.87994	7.0602	2.22381e-31	5.61305e-29
Cs9g15430	3.96457	7.58847	3.14141e-31	7.83244e-29
Cs1g24500	-1.77425	7.50035	7.72273e-31	1.9023e-28
Cs3g14610	2.78613	4.75774	1.33049e-30	3.23831e-28
Cs5g28320	-1.77221	7.9405	1.66009e-30	3.993e-28
Cs6g11950	3.70218	4.97174	2.15547e-30	5.12425e-28
Cs6g07410	7.42074	2.57895	3.85823e-30	9.06683e-28
Cs6g02180	-2.5916	4.47244	4.30491e-30	1.00016e-27
Cs4g09080	2.1184	4.6414	4.68439e-30	1.07609e-27
Cs5g15130	-1.74275	5.7969	4.89629e-30	1.11227e-27
Cs3g06820	4.4467	2.51373	7.1669e-30	1.61019e-27
Cs4g12760	3.05291	3.96488	1.28731e-29	2.86076e-27
Cs7g25170	-3.38179	3.28444	2.99153e-29	6.57653e-27
Cs5g33200	2.1989	4.32427	3.04437e-29	6.62151e-27
orange1.1t03024	5.61366	10.7575	3.08282e-29	6.63456e-27
Cs4g05190	3.74102	3.91501	4.99625e-29	1.06405e-26
Cs3g18330	2.35933	6.20521	8.69685e-29	1.83306e-26
orange1.1t04360	-3.25007	3.4763	9.32261e-29	1.94491e-26
orange1.1t03582	2.8389	3.59206	1.06649e-28	2.20246e-26
Cs7g25580	5.36241	5.82743	1.51719e-28	3.1019e-26
orange1.1t01751	1.84429	6.20683	5.08993e-28	1.03033e-25
Cs9g15800	-4.79727	3.55121	5.91309e-28	1.18523e-25
Cs6g01980	1.71377	7.62715	7.66152e-28	1.52077e-25
Cs8g19450	4.19572	3.86764	1.38058e-27	2.71403e-25
orange1.1t01658	4.47813	2.80822	1.47523e-27	2.87249e-25
Cs5g02910	-2.81915	3.15192	1.52157e-27	2.93476e-25
orange1.1t01957	4.80834	6.12643	1.82653e-27	3.49004e-25
Cs1g24440	3.60887	9.96059	2.34142e-27	4.43243e-25
Cs8g05000	-2.04737	4.37626	3.21766e-27	6.03533e-25
Cs6g07200	-2.11003	6.84678	4.61379e-27	8.57535e-25
Cs8g09730	1.67329	6.5643	5.69117e-27	1.04825e-24
Cs2g25450	4.23189	4.81373	6.06647e-27	1.1074e-24
Cs7g15760	2.43807	4.99882	2.39542e-26	4.33402e-24
Cs2g06730	-2.53613	4.26276	2.4655e-26	4.42169e-24
Cs7g07050	-2.44771	4.49664	4.74289e-26	8.43203e-24
orange1.1t04182	1.94498	10.7568	4.83312e-26	8.51838e-24
Cs9g03630	2.29386	9.29323	5.60466e-26	9.72958e-24
Cs5g07856	-9.10822	1.15485	5.61551e-26	9.72958e-24
Cs8g11330	3.94923	5.61782	6.7181e-26	1.15421e-23
Cs1g13520	1.92724	6.43621	9.25448e-26	1.57673e-23
Cs7g26930	1.91939	5.94782	1.22261e-25	2.06581e-23
Cs5g11130	4.32524	5.03832	1.80887e-25	3.03134e-23
Cs9g04880	-2.07846	5.43561	2.33236e-25	3.87683e-23
orange1.1t02754	1.59859	8.87644	3.71859e-25	6.13118e-23
Cs1g20890	-2.01775	4.17066	4.59803e-25	7.52053e-23
Cs7g32220	1.8332	8.8017	4.70227e-25	7.63e-23
Cs2g07240	5.73479	6.05547	5.92927e-25	9.54519e-23
Cs8g09160	2.29245	6.94314	6.66142e-25	1.05845e-22
orange1.1t03040	1.74951	5.03995	6.67843e-25	1.05845e-22
Cs7g10800	-1.5518	6.35573	6.77768e-25	1.06592e-22
Cs3g13870	1.61305	6.37166	7.35798e-25	1.14835e-22
orange1.1t03684	4.72352	2.58906	8.57561e-25	1.32824e-22
Cs5g27580	2.09901	7.3187	9.53399e-25	1.46558e-22
Cs5g16850	4.95734	7.41165	9.88941e-25	1.50887e-22
Cs2g18800	-1.6752	6.2408	1.23661e-24	1.87278e-22
Cs4g19980	-1.77119	9.5284	1.27528e-24	1.91714e-22
Cs1g06750	-1.73857	7.71914	1.51493e-24	2.26078e-22
orange1.1t02122	-2.59591	3.71304	1.54108e-24	2.28314e-22
Cs5g08850	-2.22385	4.67476	2.38544e-24	3.50866e-22
Cs5g15510	1.96075	6.16155	2.63664e-24	3.84046e-22
Cs1g13700	-1.56506	6.04333	2.64859e-24	3.84046e-22
Cs4g18280	-2.40203	5.5099	4.66082e-24	6.71059e-22
Cs6g21840	2.51202	4.3079	5.83796e-24	8.34665e-22
Cs4g06430	-2.6741	3.46215	6.10084e-24	8.66192e-22
Cs3g08400	-1.65224	5.93295	9.20844e-24	1.29839e-21
Cs7g24940	3.61409	7.3961	9.66112e-24	1.35289e-21
Cs1g24060	-2.00109	5.18382	1.24805e-23	1.7358e-21
Cs7g28340	-1.9186	5.14449	1.79969e-23	2.48612e-21
Cs6g11690	3.08051	2.72857	2.1536e-23	2.95505e-21
orange1.1t02755	3.56516	3.78076	2.32568e-23	3.1541e-21
Cs5g02430	-6.71932	1.43388	2.32951e-23	3.1541e-21
Cs2g02180	-2.2901	9.30328	2.54063e-23	3.41732e-21
Cs1g12670	-2.59513	3.4139	3.08491e-23	4.12229e-21
Cs8g12630	-4.8603	2.52861	3.15243e-23	4.18516e-21
orange1.1t04376	2.42558	10.3651	3.25628e-23	4.29514e-21
Cs8g05060	2.09091	8.34357	4.24758e-23	5.56677e-21
Cs5g07400	1.47418	6.9105	4.3244e-23	5.63136e-21
Cs5g09860	-3.1965	2.33573	4.46254e-23	5.77447e-21
Cs4g02670	4.30562	4.23489	4.96992e-23	6.39057e-21
Cs1g13320	2.36076	3.88107	6.09958e-23	7.79412e-21
Cs3g11760	2.03644	5.1107	6.77945e-23	8.60907e-21
Cs8g17920	-3.72431	2.22755	7.31252e-23	9.22867e-21
Cs4g13890	-1.51804	5.23519	1.11475e-22	1.39823e-20
Cs2g15260	-4.91704	2.13368	1.39482e-22	1.73885e-20
Cs2g14490	-1.9853	4.33088	1.42505e-22	1.76576e-20
Cs6g05260	7.04158	3.80667	1.44091e-22	1.77466e-20
Cs1g11780	1.39237	6.64	1.60728e-22	1.96771e-20
Cs7g14940	4.16791	2.96914	1.68476e-22	2.05029e-20
Cs1g25830	-3.56551	2.4031	1.77369e-22	2.14574e-20
Cs5g22080	3.34905	3.19733	2.43937e-22	2.9337e-20
Cs9g07230	-2.8096	4.52461	4.10621e-22	4.90944e-20
Cs1g03280	-2.17254	5.5698	6.22858e-22	7.40368e-20
Cs1g06760	1.50961	9.13159	7.16868e-22	8.47189e-20
Cs9g03320	-1.51332	5.63668	1.11542e-21	1.31062e-19
Cs5g28310	5.42318	2.48104	1.44504e-21	1.68822e-19
orange1.1t02069	-1.57676	5.11577	1.46658e-21	1.70365e-19
Cs3g06830	2.57951	8.45283	1.86844e-21	2.15821e-19
Cs9g07830	-1.43103	5.19089	2.5327e-21	2.90905e-19
Cs8g10950	-2.57678	3.41802	2.65227e-21	3.02937e-19
Cs5g27880	-1.60741	5.68232	3.21949e-21	3.6568e-19
Cs9g10430	2.83644	3.64748	4.67944e-21	5.2857e-19
Cs3g25010	4.64057	1.49671	6.20348e-21	6.96869e-19
orange1.1t02547	1.38576	6.08373	6.50223e-21	7.26438e-19
Cs6g09160	1.35492	5.93757	6.81373e-21	7.57101e-19
Cs9g16640	1.77439	9.05673	6.91388e-21	7.64077e-19
Cs5g09390	1.27185	8.54206	9.22657e-21	1.01418e-18
Cs4g05390	-1.44095	5.63042	9.44047e-21	1.03214e-18
Cs6g20830	1.57082	5.06171	1.04864e-20	1.14039e-18
orange1.1t04139	1.59956	10.2136	1.17981e-20	1.27625e-18
Cs5g05240	-2.13276	6.23456	1.2124e-20	1.30461e-18
Cs4g02680	4.62918	1.48616	1.32672e-20	1.42015e-18
Cs5g12890	3.30818	2.21921	1.58534e-20	1.68814e-18
Cs4g01680	2.00059	6.23897	1.64184e-20	1.73925e-18
Cs2g10210	7.08538	1.00528	1.96559e-20	2.07147e-18
Cs3g23020	-1.91627	5.32039	3.61094e-20	3.78593e-18
orange1.1t00246	4.13571	1.48593	3.78269e-20	3.94577e-18
Cs3g20970	1.88546	5.97051	4.65741e-20	4.83355e-18
Cs3g21170	1.5826	10.208	4.85277e-20	5.01085e-18
Cs7g29040	-3.42868	3.29148	4.97665e-20	5.11295e-18
Cs9g14710	3.51627	7.69571	6.73612e-20	6.886e-18
Cs9g01250	-1.79226	7.62323	7.34097e-20	7.46697e-18
orange1.1t03798	-3.35155	1.84894	7.83388e-20	7.9289e-18
Cs2g27470	1.36526	7.94508	1.04536e-19	1.05282e-17
Cs9g11750	-3.90732	1.85681	1.21878e-19	1.22147e-17
Cs4g13160	-2.02964	5.27445	1.72582e-19	1.72119e-17
orange1.1t01926	-2.77509	2.56756	2.19895e-19	2.1824e-17
Cs6g02260	-1.36457	6.7671	2.21791e-19	2.19059e-17
Cs3g15460	-2.78513	8.50284	2.5125e-19	2.46962e-17
Cs5g07854	-8.53811	0.622265	2.62452e-19	2.56739e-17
Cs5g10140	-1.68222	6.66119	3.39921e-19	3.30937e-17
Cs2g20140	-2.5193	5.02421	3.67276e-19	3.55875e-17
Cs4g12290	5.23203	1.13741	4.06778e-19	3.92291e-17
Cs8g03710	-1.71754	4.60347	4.44242e-19	4.2641e-17
Cs1g16000	-4.301	2.92971	6.23339e-19	5.95522e-17
Cs1g02070	9.55309	1.56977	7.51379e-19	7.14509e-17
Cs6g15210	-1.79822	4.144	7.57337e-19	7.16841e-17
orange1.1t00340	-2.07897	6.34854	8.71763e-19	8.21345e-17
Cs5g08640	1.73676	6.4797	8.9045e-19	8.35103e-17
Cs1g26340	4.86212	1.40535	9.8468e-19	9.1926e-17
orange1.1t03833	1.21907	7.49533	1.01854e-18	9.46549e-17
Cs4g16000	-1.74224	4.37201	1.17032e-18	1.08268e-16
Cs3g18490	-1.88073	4.03672	1.26286e-18	1.16303e-16
Cs3g18810	1.4192	5.72879	1.42981e-18	1.31087e-16
Cs7g04580	-1.48791	8.35431	1.54556e-18	1.41066e-16
Cs1g25530	-2.5538	5.9573	1.70359e-18	1.54799e-16
Cs9g16720	-4.21253	1.48196	1.94162e-18	1.75648e-16
Cs5g28710	1.64392	7.30522	2.20894e-18	1.9895e-16
orange1.1t00230	3.272	1.84285	2.39119e-18	2.14421e-16
Cs2g31050	5.34852	7.79265	2.45671e-18	2.19334e-16
Cs9g18830	4.32327	0.91367	2.61005e-18	2.3201e-16
Cs9g10520	-2.02003	6.23877	2.67493e-18	2.36749e-16
Cs6g07780	1.90904	3.61547	2.78974e-18	2.45846e-16
Cs1g23870	-4.00173	1.39028	3.06644e-18	2.6907e-16
Cs4g03740	3.76206	4.39381	3.11446e-18	2.72116e-16
Cs9g04030	-1.7521	5.24466	3.39498e-18	2.95363e-16
Cs4g07280	-1.28105	5.98458	4.26974e-18	3.69894e-16
Cs1g26700	1.37743	7.41167	4.70921e-18	4.06244e-16
Cs5g08360	-2.35991	5.37804	5.3131e-18	4.56413e-16
Cs7g31010	2.22263	5.90481	5.77531e-18	4.94043e-16
Cs2g30650	-1.25779	6.31223	6.42634e-18	5.47444e-16
Cs2g25150	1.37066	6.42798	7.07855e-18	6.00502e-16
Cs1g12560	1.95969	5.13294	7.28762e-18	6.15683e-16
Cs3g18690	-3.26444	6.99083	7.91257e-18	6.65731e-16
Cs7g18940	2.14634	3.72325	8.64873e-18	7.24686e-16
Cs9g09290	4.05712	6.44326	9.03213e-18	7.53722e-16
orange1.1t02078	2.155	2.8525	1.01345e-17	8.42273e-16
Cs8g19930	4.63535	1.73716	1.10864e-17	9.1766e-16
orange1.1t00636	1.3709	5.22654	1.15246e-17	9.50079e-16
Cs6g16650	1.80923	6.75873	1.19824e-17	9.83854e-16
Cs1g16550	-2.15055	6.50964	1.31437e-17	1.07489e-15
Cs5g13970	1.93056	6.10205	1.40327e-17	1.14303e-15
Cs1g09665	-2.83118	2.10458	1.46823e-17	1.19119e-15
Cs1g22680	1.96657	5.15871	1.54469e-17	1.24827e-15
Cs2g06900	1.4597	4.57724	1.59837e-17	1.28656e-15
Cs1g14580	1.88434	3.87741	1.99572e-17	1.6001e-15
orange1.1t03227	1.58226	6.11389	2.49416e-17	1.99192e-15
Cs5g21860	4.15517	6.22413	3.13711e-17	2.49553e-15
Cs1g19930	-1.34454	4.84237	3.14916e-17	2.49553e-15
Cs5g05900	1.87733	4.21002	3.248e-17	2.56392e-15
Cs2g21100	-1.38536	8.30629	3.30481e-17	2.59873e-15
Cs8g21020	1.68174	4.54202	3.5271e-17	2.76289e-15
Cs2g21235	2.262	4.57242	3.78925e-17	2.95692e-15
Cs4g20590	-1.76747	4.86485	3.83585e-17	2.9819e-15
Cs8g19840	1.71991	5.26438	3.85645e-17	2.98656e-15
Cs2g10630	-2.26376	3.56381	4.15782e-17	3.20779e-15
Cs7g28380	1.46521	6.83591	4.36444e-17	3.35454e-15
Cs2g28830	-1.86903	4.29963	5.04192e-17	3.86075e-15
Cs2g30460	1.16448	8.08559	6.82279e-17	5.18556e-15
Cs6g16980	2.27334	7.1269	6.84091e-17	5.18556e-15
Cs6g21420	-1.76388	6.70572	6.84814e-17	5.18556e-15
Cs8g12690	-2.03486	6.76486	8.0427e-17	6.06764e-15
Cs6g09420	-1.85119	5.67793	8.66525e-17	6.49611e-15
Cs4g08380	5.04962	1.57871	8.67419e-17	6.49611e-15
Cs6g01210	1.15684	7.45867	1.01414e-16	7.56717e-15
Cs8g01040	-1.30575	7.14737	1.02751e-16	7.6391e-15
Cs1g22750	-2.18988	3.07882	1.04874e-16	7.76862e-15
Cs8g17450	1.20142	7.77638	1.09564e-16	8.0868e-15
Cs1g21920	-4.9436	0.622602	1.10318e-16	8.11311e-15
Cs5g11310	1.66813	5.31943	1.11079e-16	8.13979e-15
orange1.1t02075	-3.43933	3.61816	1.17846e-16	8.60486e-15
Cs2g16620	-1.31789	4.91687	1.65966e-16	1.20753e-14
Cs2g13530	1.25176	5.44619	2.04975e-16	1.48607e-14
Cs7g10050	-1.42427	6.5589	2.43357e-16	1.7581e-14
Cs7g06080	3.98657	4.77405	2.47517e-16	1.78186e-14
Cs5g27140	-2.53426	2.99848	2.61669e-16	1.87713e-14
Cs1g18460	2.20722	7.45292	2.9679e-16	2.12164e-14
Cs5g24520	2.3204	8.43908	3.31986e-16	2.36497e-14
Cs8g16590	-1.91509	3.54812	3.43857e-16	2.43458e-14
Cs2g19230	-2.39043	4.14509	3.4414e-16	2.43458e-14
Cs8g14280	1.27782	5.74268	3.69738e-16	2.60665e-14
Cs8g06820	1.13771	6.83294	4.06202e-16	2.85388e-14
Cs3g19360	-2.30808	5.28993	4.2171e-16	2.95269e-14
Cs6g09820	1.09225	9.80164	4.39334e-16	3.06559e-14
Cs1g17320	1.17106	6.83424	5.01838e-16	3.48982e-14
Cs3g06580	1.69275	5.02342	5.08218e-16	3.52221e-14
Cs7g27180	1.16403	7.28301	5.30916e-16	3.66709e-14
Cs9g13990	1.56071	4.65656	5.40295e-16	3.7193e-14
Cs7g14450	1.14944	5.92079	5.46545e-16	3.7497e-14
Cs7g13790	1.1955	6.82104	5.56784e-16	3.80717e-14
Cs2g16570	1.34454	6.02437	6.07893e-16	4.14279e-14
Cs4g06650	-2.17426	3.69346	6.20444e-16	4.21428e-14
orange1.1t00251	-1.10696	6.08569	6.5923e-16	4.4629e-14
Cs7g12600	-2.2433	3.5687	6.80785e-16	4.59362e-14
Cs6g06690	-1.09765	5.72733	7.23133e-16	4.86331e-14
Cs5g06720	-1.23047	8.01148	7.45425e-16	4.99679e-14
Cs7g29860	1.27992	5.71598	7.75394e-16	5.17927e-14
Cs2g15820	-1.32102	6.0269	7.77714e-16	5.17927e-14
Cs3g23040	-1.59319	4.2247	7.84739e-16	5.20909e-14
Cs2g18250	2.14504	7.74048	8.83929e-16	5.84852e-14
Cs1g16750	1.14646	6.16291	1.06627e-15	7.03223e-14
Cs4g17630	1.85476	6.78046	1.1152e-15	7.33129e-14
orange1.1t02713	-2.56719	3.61619	1.12905e-15	7.39852e-14
orange1.1t03023	6.08739	0.0953973	1.38577e-15	9.05181e-14
Cs1g21390	2.12415	3.36289	1.47139e-15	9.58047e-14
Cs1g26330	3.33621	6.39796	1.51272e-15	9.81826e-14
Cs4g14230	1.56598	5.41328	1.62597e-15	1.05199e-13
Cs2g30480	3.61699	3.70003	1.77729e-15	1.14627e-13
Cs3g09160	-4.75831	0.732045	2.51878e-15	1.61938e-13
orange1.1t01704	4.13825	2.44142	2.53695e-15	1.62596e-13
orange1.1t00805	-1.14748	6.42436	2.83604e-15	1.81196e-13
Cs5g10060	-1.16227	5.5313	2.87338e-15	1.8301e-13
orange1.1t00555	1.35581	7.09129	3.13259e-15	1.989e-13
Cs6g12830	-3.09181	1.52877	3.26915e-15	2.06928e-13
Cs7g18460	2.28943	3.17565	3.50555e-15	2.21206e-13
Cs2g20010	1.34541	6.13084	3.81716e-15	2.40129e-13
orange1.1t01260	2.56292	1.8825	4.58941e-15	2.87824e-13
Cs4g20420	1.3076	7.7058	4.94998e-15	3.09487e-13
Cs1g22240	1.25866	6.64279	5.21109e-15	3.24819e-13
Cs2g29840	3.82606	1.99747	5.32339e-15	3.30811e-13
Cs5g23960	2.08024	3.3121	5.94035e-15	3.68031e-13
Cs1g22140	2.15819	7.52098	5.9678e-15	3.68615e-13
Cs9g06670	1.86218	4.19463	6.4716e-15	3.9853e-13
Cs2g21460	1.10454	8.80602	6.55115e-15	4.02217e-13
Cs9g05010	-1.33785	4.67558	6.62539e-15	4.05557e-13
orange1.1t02887	1.44587	6.11608	7.55308e-15	4.59706e-13
Cs2g15270	-4.00796	4.45962	7.55496e-15	4.59706e-13
Cs7g16060	-1.54688	4.02317	8.1377e-15	4.93695e-13
Cs2g19210	1.70388	4.17187	9.04966e-15	5.47397e-13
orange1.1t03118	4.60787	1.17094	9.29191e-15	5.60393e-13
Cs2g28800	2.68943	5.58462	9.41787e-15	5.66318e-13
Cs6g19640	1.31286	6.90844	1.00699e-14	6.03748e-13
Cs7g26710	2.48881	5.89332	1.07242e-14	6.411e-13
Cs8g19910	-1.06714	8.38997	1.0765e-14	6.41664e-13
Cs7g15480	-2.64981	2.74344	1.09508e-14	6.50843e-13
Cs9g16450	-2.11649	4.56388	1.13081e-14	6.70121e-13
Cs5g06140	-4.56014	0.783723	1.13408e-14	6.70121e-13
orange1.1t02388	1.36003	6.20825	1.17736e-14	6.93692e-13
Cs7g13190	-7.95025	0.0896099	1.28758e-14	7.56454e-13
Cs7g30820	2.88362	2.71399	1.36113e-14	7.97371e-13
orange1.1t03155	-2.45377	5.53076	1.4506e-14	8.47355e-13
Cs1g20590	-1.21823	5.78532	1.52662e-14	8.89222e-13
Cs4g04530	4.31866	1.20227	1.63156e-14	9.47652e-13
Cs2g09450	1.23983	5.12675	1.73008e-14	1.00203e-12
Cs3g26630	1.03668	8.83174	1.92817e-14	1.1136e-12
orange1.1t01755	1.17731	9.72278	1.94042e-14	1.11752e-12
Cs9g02530	1.19315	6.50565	2.01123e-14	1.15505e-12
Cs1g25820	-5.90506	-0.0394421	2.08666e-14	1.19501e-12
Cs6g15150	1.71316	4.21289	2.3069e-14	1.31745e-12
orange1.1t04895	3.19652	1.26467	2.36445e-14	1.34655e-12
Cs3g07330	-1.71162	5.58262	2.42878e-14	1.37934e-12
Cs9g14380	-9.30318	1.33942	2.584e-14	1.46343e-12
Cs1g20600	-1.09625	5.68531	3.01191e-14	1.70106e-12
Cs3g03790	-3.96887	1.36236	3.29338e-14	1.85491e-12
Cs4g09140	1.70658	5.98923	3.34225e-14	1.87726e-12
orange1.1t02608	-2.16856	3.44973	3.73682e-14	2.09313e-12
Cs5g01020	-4.34012	1.69901	3.84392e-14	2.14724e-12
Cs5g10170	-6.12904	0.15665	3.94865e-14	2.19973e-12
Cs2g27610	-1.29567	7.30879	4.14811e-14	2.30457e-12
Cs2g19590	-1.27547	5.60297	4.32926e-14	2.39869e-12
Cs1g16730	-1.33036	4.86315	4.41373e-14	2.43888e-12
orange1.1t00956	-1.47659	8.31534	4.65289e-14	2.5641e-12
Cs5g10080	-1.11181	5.18454	4.74369e-14	2.60712e-12
Cs7g24680	-1.5308	3.69818	4.93517e-14	2.70508e-12
Cs5g34950	2.52059	1.87447	5.65599e-14	3.09189e-12
Cs7g07300	1.84654	6.95712	5.73775e-14	3.12822e-12
Cs7g11210	1.53977	6.94859	5.86876e-14	3.19114e-12
Cs5g04770	-1.37821	4.82944	5.93792e-14	3.22018e-12
Cs7g22420	-1.37807	5.05028	6.13139e-14	3.31631e-12
Cs5g32930	-1.27513	10.0847	6.61958e-14	3.57091e-12
Cs2g06990	4.12686	1.27102	6.88558e-14	3.70463e-12
Cs9g10530	-2.01255	3.20936	7.41449e-14	3.97872e-12
Cs9g12370	-1.09724	5.44583	8.36971e-14	4.47955e-12
Cs4g16220	-6.18744	0.208196	9.72693e-14	5.19235e-12
Cs1g16440	-1.27385	4.4278	1.01189e-13	5.38151e-12
Cs6g04120	-2.01439	4.75943	1.01339e-13	5.38151e-12
Cs3g10410	2.01824	7.50708	1.04114e-13	5.51455e-12
orange1.1t00313	-3.0574	2.75128	1.15506e-13	6.10213e-12
Cs5g04690	-3.48766	1.3455	1.22824e-13	6.47199e-12
Cs5g09560	1.98866	3.25472	1.31731e-13	6.92349e-12
Cs8g04150	1.3696	6.08518	1.32444e-13	6.9431e-12
Cs7g26250	-5.29616	0.593883	1.35336e-13	7.07659e-12
Cs1g25560	1.91006	3.07488	1.35887e-13	7.08725e-12
Cs5g01770	-2.17812	3.53642	1.49751e-13	7.79049e-12
Cs7g09860	-3.25319	6.12978	1.51898e-13	7.88213e-12
Cs2g29540	-1.35786	4.6945	1.55987e-13	8.07381e-12
Cs9g09370	-2.4961	2.72196	1.83253e-13	9.46112e-12
Cs3g26820	-1.01909	6.00595	1.90264e-13	9.79834e-12
Cs8g14150	1.33493	6.54708	2.10291e-13	1.08025e-11
Cs6g16770	3.26136	2.21108	2.23102e-13	1.14319e-11
Cs2g21480	-3.75899	0.732316	2.49548e-13	1.2755e-11
Cs6g06610	-2.92409	1.52361	2.97607e-13	1.51735e-11
Cs4g18310	-1.23614	8.04532	3.12924e-13	1.59148e-11
Cs5g24460	-2.19405	2.51815	3.26095e-13	1.65435e-11
Cs6g05130	-1.13852	6.26119	3.33165e-13	1.68603e-11
Cs5g03170	2.81768	2.17687	3.70522e-13	1.87045e-11
Cs6g07840	-1.29309	7.1807	3.77965e-13	1.90213e-11
Cs3g09820	-1.60103	5.20506	3.78658e-13	1.90213e-11
orange1.1t00267	-1.16874	6.19254	3.8652e-13	1.93686e-11
Cs4g02910	1.06773	7.28075	4.09512e-13	2.04706e-11
Cs8g20410	2.13633	4.42729	4.399e-13	2.1936e-11
Cs2g09600	1.75924	3.78045	4.43849e-13	2.2079e-11
Cs7g22000	1.19448	7.4041	5.16076e-13	2.56096e-11
orange1.1t01622	-1.42833	8.87214	5.19171e-13	2.57009e-11
Cs6g07830	-1.62851	9.78116	6.30756e-13	3.10742e-11
Cs4g20550	-1.89924	3.20646	6.45117e-13	3.17053e-11
orange1.1t03769	8.35836	0.447074	6.55091e-13	3.21183e-11
Cs7g08450	1.29052	7.7548	7.22902e-13	3.53582e-11
Cs2g13690	1.26886	6.06623	7.99425e-13	3.90077e-11
Cs2g22320	1.89724	2.95424	9.08328e-13	4.42161e-11
Cs3g18480	-1.01339	6.76078	9.55777e-13	4.64154e-11
Cs9g18030	1.046	6.60004	1.00542e-12	4.87105e-11
Cs1g19830	-1.75388	7.71465	1.05687e-12	5.10819e-11
orange1.1t03594	-2.50148	1.9093	1.10765e-12	5.34102e-11
Cs3g10420	3.62465	1.20843	1.11103e-12	5.34472e-11
Cs7g19420	-2.26514	6.33022	1.13783e-12	5.46077e-11
Cs6g03940	-1.06184	5.52975	1.18146e-12	5.65689e-11
Cs8g18490	-1.13404	6.74307	1.21976e-12	5.82663e-11
orange1.1t03052	-1.14898	4.89431	1.25954e-12	6.00263e-11
Cs8g13110	-1.14318	5.19446	1.26564e-12	6.01768e-11
Cs4g18920	-1.0668	5.12014	1.29833e-12	6.1532e-11
Cs3g16860	1.05377	5.92797	1.30016e-12	6.1532e-11
orange1.1t01283	1.22638	5.36033	1.35666e-12	6.40573e-11
Cs2g16800	-1.43296	5.21743	1.37695e-12	6.4866e-11
Cs3g19070	-3.08173	2.37565	1.42538e-12	6.6993e-11
Cs6g15460	1.12483	9.7465	1.4423e-12	6.76325e-11
Cs3g25140	3.81192	2.03815	1.46557e-12	6.85664e-11
Cs8g05810	-2.26959	2.37929	1.53296e-12	7.15556e-11
Cs7g06320	-1.42433	7.45837	1.55552e-12	7.24431e-11
Cs5g08960	-1.11572	5.4929	1.62667e-12	7.55845e-11
Cs5g26130	1.25789	7.49082	1.74973e-12	8.11186e-11
Cs2g10540	-1.91446	3.44921	1.80843e-12	8.36503e-11
Cs2g16120	-3.78864	0.882268	1.87915e-12	8.6725e-11
orange1.1t02780	1.97814	3.06937	2.00068e-12	9.21258e-11
Cs6g03020	1.57479	8.07415	2.09787e-12	9.63842e-11
orange1.1t00508	-1.6632	4.84769	2.12114e-12	9.72349e-11
Cs4g18120	1.87916	9.96539	2.15738e-12	9.86749e-11
Cs3g18100	2.3175	1.99738	2.34108e-12	1.06838e-10
orange1.1t01790	-1.66871	6.34757	2.40523e-12	1.09521e-10
orange1.1t01713	-1.21879	5.81578	2.41203e-12	1.09587e-10
orange1.1t05715	1.17202	4.59894	2.46084e-12	1.11556e-10
Cs9g07970	-2.20747	1.86616	2.47889e-12	1.12126e-10
Cs4g20580	-1.82686	3.8541	2.57896e-12	1.16395e-10
Cs7g01140	-1.41962	3.74394	2.69759e-12	1.21481e-10
Cs1g12650	-1.5877	4.59513	2.72892e-12	1.22621e-10
Cs9g10650	-3.3398	3.2829	2.79511e-12	1.2532e-10
Cs5g29050	1.51264	5.03378	3.00854e-12	1.34301e-10
orange1.1t00449	2.25373	2.66788	3.0394e-12	1.35382e-10
Cs1g16220	-1.28579	7.34987	3.22448e-12	1.43314e-10
Cs6g18640	-1.70934	4.37704	3.37586e-12	1.49717e-10
orange1.1t01787	-2.39622	2.26843	3.5701e-12	1.57988e-10
Cs8g19730	-1.12613	5.91298	3.67426e-12	1.62247e-10
Cs5g18280	-1.22254	4.49348	3.7302e-12	1.64009e-10
Cs8g14120	1.71155	6.58935	3.77843e-12	1.65773e-10
orange1.1t02191	-3.10014	0.784283	3.94158e-12	1.7256e-10
Cs1g22500	-1.06763	5.58446	4.63255e-12	2.01516e-10
Cs1g18540	-2.52253	7.84641	4.7048e-12	2.03996e-10
Cs7g05360	1.53196	5.13003	4.70952e-12	2.03996e-10
Cs3g17580	1.20304	6.52504	5.18576e-12	2.2415e-10
Cs8g10280	-1.03238	6.31345	5.2407e-12	2.26047e-10
Cs2g22040	-2.35788	2.15836	5.25207e-12	2.2606e-10
Cs9g06130	2.60728	2.60185	5.28702e-12	2.26805e-10
Cs1g08440	-1.59789	7.75178	5.30022e-12	2.26805e-10
Cs3g19630	3.22669	0.944325	5.39091e-12	2.30099e-10
Cs9g07090	-1.13523	4.77866	5.45603e-12	2.32393e-10
Cs8g18710	-1.73998	5.68577	5.59818e-12	2.37952e-10
orange1.1t03222	1.44569	3.742	5.7148e-12	2.42405e-10
Cs8g09720	1.52885	9.0012	6.04348e-12	2.55287e-10
Cs3g19760	1.22919	7.47525	6.37153e-12	2.68037e-10
Cs6g07320	-1.09008	7.79886	6.45338e-12	2.70923e-10
Cs7g01030	-1.1309	5.88604	7.0774e-12	2.95301e-10
Cs2g10550	-1.054	6.01	7.36119e-12	3.06517e-10
Cs9g11480	-2.2238	3.37104	7.77045e-12	3.229e-10
Cs9g16960	-1.56214	3.62549	8.13258e-12	3.37263e-10
Cs5g13450	2.40291	4.0318	8.28705e-12	3.42973e-10
Cs3g11700	-3.43359	1.96534	8.50094e-12	3.51114e-10
Cs9g16440	-2.17517	2.50281	8.73288e-12	3.59967e-10
Cs1g20800	1.11628	8.79832	8.91578e-12	3.66767e-10
Cs5g20360	-2.82048	1.85346	9.35157e-12	3.83921e-10
orange1.1t02321	-2.0584	2.75297	9.43564e-12	3.86596e-10
Cs1g26190	-1.51717	6.87531	9.46288e-12	3.86937e-10
Cs5g32640	-1.05349	7.76599	9.81974e-12	4.00728e-10
Cs7g25700	-1.33614	4.45502	1.01595e-11	4.13765e-10
Cs3g06220	1.52588	4.11551	1.01918e-11	4.14259e-10
Cs7g29270	1.37976	4.60369	1.027e-11	4.16606e-10
Cs6g06320	-1.4992	4.36375	1.07059e-11	4.32572e-10
Cs8g16920	-2.71495	1.51363	1.09891e-11	4.4314e-10
Cs8g13100	1.49607	5.11933	1.18354e-11	4.76328e-10
Cs1g21130	-2.28373	2.63346	1.24976e-11	5.0199e-10
Cs9g04190	-2.40384	2.15512	1.35546e-11	5.4338e-10
Cs9g08760	-2.1456	6.47235	1.3828e-11	5.53256e-10
Cs2g28060	-1.60705	3.76286	1.50001e-11	5.98468e-10
Cs4g17870	-1.78636	7.3251	1.50166e-11	5.98468e-10
Cs1g06810	-1.64545	3.32389	1.50776e-11	5.9973e-10
Cs4g18400	-1.0217	5.98616	1.53187e-11	6.08137e-10
Cs2g10320	-2.28176	2.28665	1.57612e-11	6.24492e-10
Cs5g13940	2.11629	3.2706	1.69025e-11	6.68418e-10
Cs2g27760	-5.6811	-0.231731	1.72892e-11	6.81073e-10
Cs1g14030	1.13952	4.50455	1.73976e-11	6.84026e-10
Cs3g14240	3.04033	2.01719	1.75942e-11	6.9043e-10
Cs6g18610	-3.62711	2.86195	1.79468e-11	7.02918e-10
orange1.1t00358	-1.04902	5.40826	1.98429e-11	7.72738e-10
Cs2g14940	-2.80243	2.79263	2.13644e-11	8.27263e-10
Cs4g08740	-2.55909	1.30538	2.3701e-11	9.16004e-10
Cs4g07210	-3.44361	0.329615	2.4316e-11	9.38001e-10
Cs7g10200	-1.05978	6.34696	2.72265e-11	1.0474e-09
Cs6g20630	1.54226	3.56586	2.72545e-11	1.0474e-09
Cs2g10710	-1.11581	5.12913	2.78216e-11	1.06719e-09
Cs6g22020	-1.12215	5.50847	2.89205e-11	1.10727e-09
Cs5g18660	-2.40195	1.53933	2.94771e-11	1.12647e-09
Cs5g35060	7.62085	-0.210396	2.95328e-11	1.12649e-09
Cs3g02020	1.65174	5.72487	3.23035e-11	1.22988e-09
Cs3g14550	-1.12602	8.8896	3.34761e-11	1.27215e-09
Cs7g12610	-4.73594	3.25491	3.55731e-11	1.34934e-09
orange1.1t01981	1.14729	4.77901	4.00129e-11	1.51213e-09
Cs9g18840	1.02042	7.91812	4.09932e-11	1.54546e-09
Cs6g07970	1.75832	8.83729	4.11455e-11	1.54636e-09
Cs2g08110	1.13627	5.06182	4.19615e-11	1.57413e-09
orange1.1t06010	2.653	2.44065	4.21948e-11	1.57999e-09
Cs1g09420	1.26145	9.41724	4.90103e-11	1.83184e-09
Cs3g15040	-1.24662	6.36287	5.0955e-11	1.90105e-09
orange1.1t02024	-3.97545	0.921576	5.7906e-11	2.15645e-09
Cs5g24610	2.02442	2.87434	6.01342e-11	2.23129e-09
Cs5g25920	1.86414	3.79539	6.1051e-11	2.26121e-09
Cs3g20340	-2.15007	2.76773	6.51977e-11	2.41043e-09
Cs7g19640	3.2468	0.881427	6.70177e-11	2.47324e-09
Cs7g16860	1.08015	4.82554	6.90229e-11	2.54266e-09
Cs8g08820	-3.88114	2.831	7.21494e-11	2.65305e-09
Cs4g05760	-2.46693	5.18164	7.65976e-11	2.79693e-09
Cs2g15360	-1.04884	5.90978	7.66095e-11	2.79693e-09
Cs1g14690	4.19514	0.952223	7.82011e-11	2.84995e-09
Cs8g16290	1.25747	8.24996	7.95723e-11	2.89476e-09
Cs3g26790	-2.22858	3.29183	8.22591e-11	2.98719e-09
Cs2g11750	1.27316	5.15449	8.38723e-11	3.04037e-09
Cs9g15300	2.32422	2.81502	8.83032e-11	3.19533e-09
orange1.1t02202	-2.58745	2.05684	9.33058e-11	3.37038e-09
Cs3g23120	-1.91506	3.98596	9.35368e-11	3.37277e-09
Cs3g04530	2.84898	1.14308	9.76843e-11	3.51612e-09
orange1.1t00647	2.90553	2.61669	1.00434e-10	3.60423e-09
Cs1g04910	-1.39185	4.15478	1.00949e-10	3.61452e-09
Cs9g14040	-1.51961	3.58509	1.0668e-10	3.8064e-09
Cs3g07770	1.80309	4.05733	1.08275e-10	3.85658e-09
orange1.1t02788	-1.35236	6.39725	1.15109e-10	4.09286e-09
Cs6g12110	-2.0246	3.54913	1.2331e-10	4.3617e-09
Cs2g03430	2.17451	3.00457	1.25096e-10	4.40964e-09
Cs2g28610	1.33836	4.00229	1.35124e-10	4.75494e-09
Cs5g16290	1.34712	4.2475	1.41502e-10	4.9708e-09
Cs6g11935	-1.78559	2.21379	1.55785e-10	5.46315e-09
Cs9g09640	1.89518	3.8383	1.58794e-10	5.55915e-09
Cs1g20120	2.26761	4.50945	1.73793e-10	6.06348e-09
Cs1g08610	2.45586	2.84738	1.76083e-10	6.12246e-09
Cs3g17150	-2.52773	3.70175	1.76577e-10	6.12924e-09
Cs5g10410	1.22942	3.97325	1.79215e-10	6.21026e-09
Cs8g15510	3.31929	0.943682	1.86244e-10	6.44292e-09
orange1.1t00194	-1.83762	5.78539	2.05692e-10	7.09169e-09
orange1.1t05946	7.58071	-0.244857	2.09065e-10	7.19585e-09
Cs3g10950	-2.03238	2.2071	2.1521e-10	7.39489e-09
Cs7g22830	-1.52303	7.06633	2.17423e-10	7.4584e-09
Cs1g02370	2.53816	2.41998	2.25958e-10	7.73821e-09
Cs8g14960	1.12872	9.65993	2.29235e-10	7.83732e-09
orange1.1t04983	-1.62814	3.37714	2.30912e-10	7.88147e-09
Cs9g15150	2.86062	2.28922	2.38179e-10	8.11595e-09
orange1.1t03235	2.44102	1.14312	2.44908e-10	8.33137e-09
Cs7g02950	-1.43179	6.06282	2.64377e-10	8.97873e-09
Cs3g07310	-7.32127	-0.453892	2.67973e-10	9.08318e-09
Cs5g33420	4.57349	-0.0650423	2.77157e-10	9.36606e-09
Cs3g17530	1.45458	4.07653	2.8593e-10	9.64659e-09
Cs8g05300	-1.11723	4.93975	2.92704e-10	9.85888e-09
Cs4g07930	7.02113	-0.713176	2.9478e-10	9.91246e-09
Cs7g08770	-2.21414	5.48527	3.05558e-10	1.02412e-08
Cs1g01540	1.27932	7.42042	3.26104e-10	1.08941e-08
orange1.1t02040	1.76902	2.62526	3.31499e-10	1.10563e-08
Cs5g22980	9.10467	1.14008	3.52949e-10	1.17525e-08
Cs5g33980	-3.49851	0.375469	3.59928e-10	1.19654e-08
Cs1g12880	1.02807	5.03671	3.6515e-10	1.21193e-08
orange1.1t00416	2.85388	1.30057	3.75435e-10	1.24203e-08
Cs2g13170	2.58296	1.72595	3.76897e-10	1.24486e-08
Cs1g11880	-1.91154	3.03924	3.78243e-10	1.24729e-08
Cs3g14760	-2.05579	3.70061	3.88844e-10	1.28018e-08
Cs5g26150	1.60303	2.91335	4.04531e-10	1.32755e-08
Cs5g02660	2.41931	2.55882	4.05658e-10	1.32912e-08
Cs8g01960	1.76565	5.96824	4.2736e-10	1.39575e-08
Cs4g15770	2.69901	0.848623	4.47678e-10	1.45547e-08
Cs1g15390	-2.25502	2.78019	4.47782e-10	1.45547e-08
Cs7g01280	-1.44294	3.9927	4.64259e-10	1.50663e-08
Cs2g05090	1.1709	5.31204	4.74093e-10	1.53611e-08
Cs5g10240	1.65182	4.4351	4.75606e-10	1.53857e-08
Cs6g18700	2.20441	4.63828	4.94953e-10	1.59558e-08
Cs5g03060	-3.03481	3.53	4.95571e-10	1.59558e-08
Cs6g08120	-3.98874	-0.197706	5.05312e-10	1.62184e-08
Cs4g13350	1.00085	5.62803	5.1795e-10	1.6598e-08
Cs8g04160	2.4735	1.91369	5.44542e-10	1.73956e-08
Cs7g07860	-2.57701	1.71404	5.691e-10	1.81234e-08
Cs9g17460	2.14032	1.87761	5.705e-10	1.81398e-08
Cs9g12450	-1.48397	6.84743	5.90244e-10	1.86804e-08
Cs3g03335	-4.13399	0.408524	6.42462e-10	2.02079e-08
Cs5g27000	1.03079	9.09262	7.23444e-10	2.26505e-08
Cs4g09520	1.02792	5.68426	7.25968e-10	2.26948e-08
Cs6g13590	-1.04017	7.60435	7.78415e-10	2.42972e-08
Cs1g23630	1.07203	4.79576	7.81708e-10	2.43628e-08
Cs9g08340	4.24781	0.480163	7.87059e-10	2.4455e-08
Cs8g19105	4.61256	-0.47021	8.74524e-10	2.70904e-08
Cs3g26480	-1.65973	5.23408	9.17666e-10	2.83838e-08
Cs5g21760	1.19071	3.98891	9.20544e-10	2.84298e-08
Cs4g17260	-1.36991	6.39312	9.27591e-10	2.86042e-08
orange1.1t02899	1.12849	4.63586	9.38643e-10	2.89014e-08
orange1.1t00292	-5.36551	-0.494455	9.60914e-10	2.95427e-08
Cs3g21510	-1.61801	4.3589	9.7939e-10	3.00655e-08
Cs2g01750	-1.75398	4.92834	1.04739e-09	3.21048e-08
Cs1g07510	-1.0474	8.59349	1.05178e-09	3.21911e-08
Cs7g05340	-1.00081	7.62423	1.06275e-09	3.23926e-08
Cs8g02380	-2.21612	2.08504	1.06312e-09	3.23926e-08
Cs6g15730	-1.51637	4.08647	1.06545e-09	3.24155e-08
Cs7g29600	1.22651	4.29685	1.08924e-09	3.30899e-08
Cs9g01410	1.13866	9.50858	1.13534e-09	3.44392e-08
Cs5g25690	-2.71938	1.47755	1.16137e-09	3.51283e-08
orange1.1t02409	1.07609	8.7537	1.16149e-09	3.51283e-08
Cs3g16310	-2.77281	1.81258	1.17075e-09	3.53558e-08
Cs7g30780	-1.20456	6.16738	1.19907e-09	3.61578e-08
Cs9g10830	-2.27141	2.44464	1.26955e-09	3.81311e-08
Cs6g13360	1.65346	2.56931	1.2701e-09	3.81311e-08
Cs7g02540	2.24575	2.75107	1.2734e-09	3.81739e-08
orange1.1t05396	-2.05033	1.93283	1.33255e-09	3.98888e-08
Cs3g19420	-1.97061	3.45279	1.37466e-09	4.1089e-08
orange1.1t01984	1.51854	3.9885	1.39865e-09	4.16511e-08
Cs5g20660	1.02395	8.61565	1.39957e-09	4.16511e-08
Cs5g32300	1.93977	4.409	1.40222e-09	4.16692e-08
Cs4g17340	-1.62643	2.85626	1.46754e-09	4.34838e-08
orange1.1t04155	3.2279	1.51812	1.65509e-09	4.86825e-08
Cs2g09030	-1.16563	4.18843	1.66686e-09	4.88937e-08
Cs7g14550	-1.16013	3.84654	1.72578e-09	5.05494e-08
orange1.1t05411	-2.22773	2.05329	1.75306e-09	5.11287e-08
Cs2g04220	-2.39378	2.48239	1.76324e-09	5.13526e-08
Cs7g31170	-1.00103	7.68449	1.78523e-09	5.18452e-08
Cs8g05290	-1.38999	4.51544	1.80395e-09	5.23146e-08
Cs1g21210	3.2163	0.935981	1.81647e-09	5.2603e-08
orange1.1t05863	-2.68486	2.1873	1.90248e-09	5.50159e-08
Cs3g21070	2.0782	2.59154	1.94049e-09	5.60358e-08
Cs4g18790	1.05316	11.7729	1.95524e-09	5.63822e-08
Cs6g17360	-1.99523	1.85013	1.99865e-09	5.74969e-08
Cs3g02720	-1.35265	3.62131	2.0094e-09	5.76997e-08
Cs8g12070	-1.34759	4.41735	2.03135e-09	5.82482e-08
Cs7g30580	-1.537	3.49945	2.04655e-09	5.86017e-08
orange1.1t02946	2.19068	2.58998	2.05362e-09	5.87219e-08
Cs7g24820	-1.38222	4.38745	2.07194e-09	5.91631e-08
Cs7g22270	3.62111	-0.0495758	2.1316e-09	6.07819e-08
Cs1g09600	-1.30708	3.6874	2.13931e-09	6.09167e-08
orange1.1t03726	4.42068	2.16437	2.15144e-09	6.11769e-08
Cs9g07140	-2.48782	1.16287	2.15654e-09	6.12368e-08
Cs5g13980	2.13108	2.32507	2.18174e-09	6.18664e-08
Cs2g06950	1.47061	3.77622	2.31253e-09	6.53937e-08
Cs8g20900	1.66117	3.05453	2.32384e-09	6.56229e-08
Cs6g06550	1.06672	4.33544	2.3279e-09	6.56468e-08
Cs5g04280	-2.09025	1.57943	2.37289e-09	6.68234e-08
Cs3g03135	-3.4088	-0.00933508	2.39845e-09	6.73577e-08
Cs1g11740	-1.36848	3.1094	2.46412e-09	6.89179e-08
Cs6g12060	-3.49179	1.66794	2.48543e-09	6.94188e-08
Cs2g17260	-2.39812	3.92085	2.50635e-09	6.99077e-08
Cs4g16180	-1.41094	6.30352	2.64234e-09	7.36004e-08
Cs2g18270	1.60001	3.13482	2.7356e-09	7.60944e-08
Cs4g19765	1.02276	4.43401	2.75166e-09	7.64371e-08
Cs1g22410	-2.45608	2.24082	2.78061e-09	7.71366e-08
orange1.1t00536	3.06003	1.61569	2.84729e-09	7.8666e-08
Cs3g05040	4.46146	-0.159976	2.85177e-09	7.86833e-08
Cs2g04400	-1.16402	7.44097	3.00302e-09	8.26337e-08
Cs3g01480	-2.96512	2.30086	3.24142e-09	8.90738e-08
Cs3g03045	-7.22267	-0.536175	3.65325e-09	1.00122e-07
orange1.1t03837	3.18905	1.89468	3.7578e-09	1.02712e-07
Cs6g12430	-5.11941	-0.692735	3.84714e-09	1.05013e-07
Cs1g25540	-1.77529	5.1258	3.89542e-09	1.06189e-07
Cs3g26800	2.14508	2.25575	4.01321e-09	1.09254e-07
Cs3g09720	1.05546	6.21994	4.02025e-09	1.093e-07
Cs2g12670	-1.02556	5.61304	4.07972e-09	1.1077e-07
orange1.1t02212	-1.16219	4.90086	4.14362e-09	1.12356e-07
Cs1g21000	1.60586	5.18943	4.76911e-09	1.28634e-07
Cs4g09810	-1.00296	5.99949	4.78398e-09	1.28865e-07
Cs4g03940	1.01271	4.75616	5.11895e-09	1.37345e-07
Cs5g19460	-3.57745	0.294147	5.53063e-09	1.47691e-07
Cs8g06750	-1.35889	4.21526	5.58074e-09	1.48759e-07
orange1.1t03729	3.23744	1.57844	5.98042e-09	1.59205e-07
Cs3g06780	2.33761	1.36426	6.17988e-09	1.64301e-07
Cs7g16380	1.60956	3.18117	6.35341e-09	1.68695e-07
Cs7g09420	-4.32481	0.574486	6.59415e-09	1.7486e-07
Cs7g23080	1.20471	4.18455	6.86511e-09	1.81575e-07
Cs5g10320	-1.93719	1.63215	7.06165e-09	1.86532e-07
Cs1g15170	-1.8131	2.7231	7.18669e-09	1.89589e-07
orange1.1t02045	-2.57399	3.77059	7.2077e-09	1.89899e-07
Cs5g16830	5.54106	0.790401	7.59578e-09	1.99609e-07
Cs6g08550	1.65468	4.05342	7.70499e-09	2.02219e-07
Cs2g03110	-2.09951	4.55567	7.87471e-09	2.06114e-07
Cs5g06840	-1.101	4.10451	7.88364e-09	2.06114e-07
orange1.1t03822	-2.62537	1.27541	8.7739e-09	2.28804e-07
Cs5g02420	-3.51244	1.94281	8.94412e-09	2.32946e-07
Cs1g22350	-2.8201	1.34552	9.10379e-09	2.36803e-07
orange1.1t04181	1.18709	4.3489	9.49468e-09	2.46344e-07
Cs6g17210	-3.29671	0.0623234	9.7555e-09	2.5279e-07
Cs3g16960	-1.14255	4.32979	1.00793e-08	2.6085e-07
orange1.1t00051	1.10347	4.53234	1.01231e-08	2.61653e-07
Cs8g08300	1.65332	3.21408	1.02309e-08	2.64105e-07
Cs3g08520	-1.49674	2.70107	1.04864e-08	2.70359e-07
Cs3g09090	-1.44604	3.48806	1.05872e-08	2.7227e-07
Cs2g04760	-1.05244	4.99321	1.09707e-08	2.8072e-07
Cs4g20530	-1.85602	1.78426	1.1311e-08	2.89066e-07
Cs5g12880	2.47408	2.40298	1.14615e-08	2.92547e-07
Cs5g15350	-2.73642	1.45098	1.15438e-08	2.9426e-07
Cs1g21970	-1.19711	3.92753	1.15574e-08	2.9426e-07
Cs4g11690	-1.67098	2.57408	1.18768e-08	3.02017e-07
Cs7g28970	-4.69616	-0.375858	1.23331e-08	3.13231e-07
Cs6g20030	-3.67304	0.208389	1.25079e-08	3.17275e-07
Cs5g32010	-1.07553	3.89767	1.26933e-08	3.21578e-07
Cs7g08600	1.39426	4.98634	1.34089e-08	3.39287e-07
orange1.1t00291	-1.34791	3.06997	1.37384e-08	3.46339e-07
Cs7g27640	-1.30333	5.11216	1.42707e-08	3.58873e-07
Cs2g07700	2.35286	7.38575	1.54935e-08	3.88191e-07
Cs5g24240	-2.15006	2.5532	1.57502e-08	3.94142e-07
Cs9g08000	-1.07382	8.11078	1.59644e-08	3.9868e-07
Cs1g25290	-6.62917	-1.0085	1.59706e-08	3.9868e-07
Cs8g05490	-1.48818	3.41184	1.60613e-08	4.00456e-07
Cs5g19160	-1.26721	6.52045	1.61104e-08	4.01189e-07
Cs9g18740	1.53785	3.22259	1.61466e-08	4.01603e-07
Cs4g01350	1.6453	2.83112	1.68544e-08	4.17178e-07
orange1.1t04194	2.55464	3.09098	1.77305e-08	4.37275e-07
Cs2g20590	1.65998	8.6607	1.82175e-08	4.48202e-07
Cs1g01110	5.1013	0.738626	1.97558e-08	4.84884e-07
Cs1g12430	1.30452	4.11022	2.07127e-08	5.0776e-07
Cs7g15410	-1.16296	3.63478	2.09716e-08	5.13491e-07
Cs6g14250	-1.22634	4.63881	2.10823e-08	5.15361e-07
Cs6g16160	-1.40275	4.23322	2.10984e-08	5.15361e-07
Cs5g19060	1.03889	7.96327	2.11562e-08	5.16155e-07
Cs3g18800	-4.99472	-0.790508	2.17113e-08	5.27809e-07
Cs4g11620	-1.0782	4.79281	2.18515e-08	5.30586e-07
Cs7g09640	-1.67997	7.29738	2.22371e-08	5.38669e-07
Cs2g25360	-3.13802	0.545364	2.42452e-08	5.8662e-07
Cs5g02940	1.30354	5.91967	2.45309e-08	5.92829e-07
Cs3g07970	3.29516	0.312103	2.48156e-08	5.99001e-07
Cs1g24950	1.20589	5.72465	2.49239e-08	6.00907e-07
Cs2g24730	-1.00897	4.73597	2.53045e-08	6.08647e-07
Cs2g31410	1.94123	1.65735	2.54143e-08	6.1057e-07
Cs5g08340	1.12942	5.48309	2.72948e-08	6.53658e-07
Cs9g18750	4.10665	0.135763	2.73037e-08	6.53658e-07
Cs1g01800	-1.5922	4.19515	2.7967e-08	6.67975e-07
Cs5g25760	2.71362	5.87735	2.86083e-08	6.82493e-07
Cs5g01040	-1.00301	5.87891	3.06457e-08	7.28548e-07
Cs7g02920	-1.85655	2.45394	3.09414e-08	7.34724e-07
orange1.1t00566	-1.25733	10.5141	3.12394e-08	7.40938e-07
Cs9g15160	-1.24341	3.67026	3.20061e-08	7.5649e-07
Cs2g07420	-1.74911	3.28199	3.24135e-08	7.64125e-07
orange1.1t02793	1.08246	5.34746	3.29157e-08	7.74409e-07
orange1.1t06037	1.50313	2.97428	3.31008e-08	7.77868e-07
Cs9g14860	2.239	1.14266	3.3321e-08	7.82143e-07
orange1.1t01623	-6.58995	-1.03824	3.41497e-08	8.00677e-07
Cs7g16680	-3.144	1.30505	3.42355e-08	8.01769e-07
Cs7g22990	-2.07002	1.11011	3.54638e-08	8.29586e-07
Cs2g18950	-1.40611	3.13632	3.56845e-08	8.33795e-07
Cs4g03550	-1.26854	4.06611	3.71163e-08	8.65272e-07
Cs2g28330	-3.80575	0.130574	3.78291e-08	8.80692e-07
Cs1g13600	-1.06057	7.64745	3.78639e-08	8.80692e-07
Cs9g12530	3.26313	0.00962753	3.86314e-08	8.96504e-07
Cs5g03420	-1.38464	6.76778	3.92277e-08	9.09308e-07
orange1.1t03987	5.87263	1.09633	3.9734e-08	9.20002e-07
Cs8g16930	-1.59143	2.24208	3.98869e-08	9.22498e-07
Cs5g01530	7.26771	-0.511178	4.04897e-08	9.35382e-07
Cs2g28590	-1.02748	3.93741	4.12601e-08	9.52102e-07
Cs2g19630	2.90588	1.01855	4.16665e-08	9.59315e-07
Cs8g18370	-1.01122	9.2583	4.19239e-08	9.64155e-07
Cs6g11700	2.23588	2.51497	4.48085e-08	1.02934e-06
Cs9g14660	-1.49663	5.68135	4.48592e-08	1.02935e-06
Cs2g27680	-1.11536	3.86486	4.57538e-08	1.0487e-06
Cs8g05070	-1.18976	3.54111	4.5988e-08	1.05288e-06
Cs1g25650	-1.88531	1.47309	4.72111e-08	1.07968e-06
Cs2g22010	5.40216	-0.490061	4.82192e-08	1.1015e-06
Cs9g10630	1.30867	8.62205	4.95357e-08	1.13031e-06
Cs3g20290	-1.06024	4.49417	4.96895e-08	1.13256e-06
Cs7g04390	1.20747	6.0506	5.20148e-08	1.18292e-06
orange1.1t02681	3.90213	-0.034824	5.21458e-08	1.18458e-06
Cs7g27685	1.19609	4.33422	5.22487e-08	1.18539e-06
Cs8g04720	-1.48728	2.44895	5.22975e-08	1.18539e-06
orange1.1t02800	-1.9396	1.51441	5.37414e-08	1.21408e-06
Cs3g22330	-1.68825	2.42143	5.4314e-08	1.22566e-06
Cs3g24190	-1.31156	2.87281	5.53471e-08	1.2476e-06
Cs7g06310	-1.02997	6.76986	5.88388e-08	1.32193e-06
Cs6g08175	1.32625	3.38577	6.10465e-08	1.36853e-06
Cs5g09980	-1.61301	3.30044	6.35341e-08	1.42118e-06
Cs5g01200	1.38474	2.81617	6.38355e-08	1.42636e-06
Cs7g25460	-1.02766	4.57718	6.45123e-08	1.43991e-06
Cs5g11280	-2.29922	2.67453	6.49842e-08	1.44728e-06
Cs2g30590	-1.04782	5.32754	6.75463e-08	1.5023e-06
Cs6g04390	-1.28635	3.56591	6.76017e-08	1.5023e-06
Cs3g10860	1.07222	3.93791	6.78161e-08	1.50543e-06
Cs3g10930	-1.34935	3.73328	6.80914e-08	1.50955e-06
Cs7g16890	-6.59018	-1.03818	6.90882e-08	1.52861e-06
Cs3g19860	1.18259	3.43814	7.00398e-08	1.5464e-06
Cs8g11340	-1.03489	4.34085	7.02911e-08	1.55027e-06
Cs4g07650	-1.34844	3.31142	7.24015e-08	1.5923e-06
Cs3g07570	2.88545	2.26029	7.24305e-08	1.5923e-06
orange1.1t00434	2.33676	1.14252	7.2634e-08	1.59506e-06
Cs7g16840	1.25951	3.41489	7.41282e-08	1.62438e-06
Cs5g21830	-1.48821	3.09383	7.42414e-08	1.62512e-06
Cs1g22610	-1.167	3.66707	7.58118e-08	1.65595e-06
orange1.1t01006	-1.63244	2.35777	7.6415e-08	1.66557e-06
Cs7g08980	-1.44175	2.90811	7.7809e-08	1.69235e-06
Cs8g08340	1.58575	2.28852	7.89422e-08	1.71517e-06
Cs3g16480	-1.27964	5.15888	8.03485e-08	1.74387e-06
Cs1g13690	-1.17799	6.10754	8.32889e-08	1.80195e-06
Cs1g04340	-1.0424	5.21929	8.56861e-08	1.85185e-06
Cs5g04130	-1.54248	2.51929	8.6646e-08	1.87062e-06
Cs7g19830	1.94535	4.59329	8.835e-08	1.9054e-06
Cs5g13490	-2.08333	2.26269	8.89069e-08	1.91539e-06
Cs1g25030	-1.13729	4.13956	8.98986e-08	1.93471e-06
Cs5g12590	-2.59609	0.90647	9.10791e-08	1.95806e-06
Cs3g11790	1.52772	3.95213	9.54117e-08	2.04905e-06
Cs8g03980	-2.52212	0.733133	9.81629e-08	2.10371e-06
Cs5g22460	-2.34815	0.86712	9.89066e-08	2.11521e-06
Cs4g03700	1.00511	7.15461	1.00064e-07	2.13773e-06
Cs5g04300	-5.31481	-0.536054	1.0708e-07	2.28284e-06
orange1.1t01321	-2.23436	2.59223	1.08721e-07	2.31541e-06
Cs2g27650	-1.26331	7.07728	1.11414e-07	2.37029e-06
Cs5g24990	2.37018	0.702447	1.18703e-07	2.51229e-06
Cs4g16390	-1.76884	3.23608	1.19084e-07	2.51776e-06
Cs3g25470	-1.65095	2.7342	1.2003e-07	2.53515e-06
Cs6g01570	1.21575	3.33265	1.20432e-07	2.541e-06
Cs2g23870	1.75129	3.56585	1.21753e-07	2.56622e-06
Cs1g16670	-3.1718	-0.197404	1.24218e-07	2.6101e-06
Cs6g10590	-1.00521	4.50843	1.25055e-07	2.62499e-06
orange1.1t05232	2.83521	3.44422	1.27227e-07	2.66239e-06
Cs6g17510	-1.4207	3.3671	1.29968e-07	2.71697e-06
Cs2g10140	4.38848	3.72725	1.32154e-07	2.75984e-06
Cs5g20410	2.01879	1.1158	1.33372e-07	2.77677e-06
Cs1g04870	1.00415	7.76557	1.34396e-07	2.79525e-06
Cs5g26220	-1.05832	7.40164	1.36406e-07	2.83417e-06
Cs5g20600	2.48267	0.8969	1.38761e-07	2.88018e-06
orange1.1t02719	1.20335	4.71363	1.46447e-07	3.02742e-06
Cs7g02620	-1.23743	5.41107	1.49334e-07	3.07776e-06
Cs2g03280	4.77705	-0.33475	1.51489e-07	3.11902e-06
Cs5g09020	1.00098	6.28867	1.51979e-07	3.12597e-06
Cs2g12650	3.76951	0.26296	1.55576e-07	3.19674e-06
Cs4g08370	3.54066	1.43378	1.56531e-07	3.21313e-06
orange1.1t00556	-1.50152	5.27431	1.5684e-07	3.21623e-06
Cs2g05170	-2.24989	6.78591	1.57163e-07	3.21963e-06
Cs1g23710	-1.77762	3.80147	1.58179e-07	3.23722e-06
orange1.1t01882	-1.19067	3.51188	1.62344e-07	3.31582e-06
Cs3g24350	6.39644	-1.19435	1.65861e-07	3.38425e-06
Cs4g17540	1.58973	2.60135	1.75931e-07	3.57547e-06
Cs3g08350	-6.14478	0.169944	1.76882e-07	3.59122e-06
orange1.1t01983	1.05124	5.16511	1.78467e-07	3.61979e-06
Cs1g15670	1.74271	3.96291	1.78918e-07	3.62535e-06
Cs5g18050	2.90306	4.52143	1.81475e-07	3.67353e-06
orange1.1t02775	1.83873	3.77533	1.88075e-07	3.79959e-06
Cs8g17800	-2.56139	1.76185	1.88748e-07	3.80943e-06
Cs7g30610	-1.90572	1.82176	1.90293e-07	3.83682e-06
orange1.1t01952	1.0288	4.92086	2.06354e-07	4.15247e-06
Cs2g03610	1.29441	3.31827	2.08347e-07	4.18434e-06
Cs8g15060	-1.24081	4.46135	2.11733e-07	4.24401e-06
Cs5g22660	-2.60585	0.0200587	2.12507e-07	4.25535e-06
Cs2g10930	-3.96459	-0.536054	2.12766e-07	4.25637e-06
Cs9g09070	-1.33267	2.88091	2.15314e-07	4.30312e-06
Cs1g23250	4.30531	-0.713424	2.18244e-07	4.35743e-06
Cs7g01700	-2.29691	0.967885	2.26798e-07	4.51498e-06
Cs4g18340	5.53299	0.313013	2.28176e-07	4.53799e-06
Cs6g21560	-1.2949	2.91593	2.35759e-07	4.68425e-06
Cs1g24225	-6.84382	-0.842064	2.39074e-07	4.7455e-06
Cs4g20090	1.88389	1.3179	2.398e-07	4.7553e-06
Cs8g15800	-1.08394	3.77496	2.42054e-07	4.79535e-06
Cs3g07850	-3.31962	-0.473785	2.42789e-07	4.80525e-06
Cs3g23880	-1.30058	3.28782	2.46291e-07	4.86984e-06
Cs8g15240	-2.44837	2.25294	2.50065e-07	4.93968e-06
Cs1g04540	-1.0441	5.87754	2.60917e-07	5.13915e-06
Cs1g15840	-1.98559	1.9405	2.67036e-07	5.24956e-06
Cs2g21000	1.25086	8.19737	2.86949e-07	5.61941e-06
Cs1g08450	-1.5392	3.75981	2.87417e-07	5.62319e-06
Cs7g05690	-1.94092	3.14512	2.89614e-07	5.66077e-06
orange1.1t05122	1.94732	1.54595	2.9379e-07	5.73144e-06
Cs4g17780	1.47156	2.67863	3.03152e-07	5.9028e-06
orange1.1t05518	1.18013	3.26398	3.15969e-07	6.13101e-06
Cs5g24940	1.02558	4.58137	3.16072e-07	6.13101e-06
Cs2g18240	1.13417	4.04929	3.23707e-07	6.26723e-06
Cs9g07560	-1.14692	4.74209	3.24698e-07	6.27453e-06
Cs4g09670	-1.10861	3.82104	3.25365e-07	6.28147e-06
Cs6g16130	-1.74289	1.679	3.37186e-07	6.4852e-06
orange1.1t01844	-1.73804	3.74004	3.39124e-07	6.51023e-06
orange1.1t02914	1.504	2.99609	3.45354e-07	6.62361e-06
Cs2g17130	-2.00856	3.62243	3.61461e-07	6.91954e-06
Cs4g04890	-1.23324	3.40841	3.62565e-07	6.93418e-06
Cs6g21340	-1.29854	3.28613	3.65933e-07	6.99206e-06
Cs6g14370	3.43471	0.148838	3.76393e-07	7.18521e-06
Cs8g20130	2.77712	0.22641	3.80983e-07	7.25927e-06
Cs4g19060	-2.38382	3.48686	3.96977e-07	7.55699e-06
Cs7g11100	-2.42856	0.246474	4.19883e-07	7.97816e-06
Cs8g01670	1.07827	4.82263	4.2195e-07	8.01e-06
Cs1g07460	1.15613	3.60502	4.22767e-07	8.01805e-06
Cs5g30640	-1.00769	7.13443	4.30438e-07	8.15597e-06
Cs8g08710	-1.33153	3.58016	4.33064e-07	8.19814e-06
Cs5g01440	2.57237	1.748	4.41895e-07	8.34986e-06
Cs2g29780	2.10771	3.58597	4.61826e-07	8.71036e-06
Cs9g14330	1.44724	2.56358	4.88082e-07	9.18862e-06
Cs8g02840	1.24653	5.76371	5.00902e-07	9.42129e-06
Cs1g02160	7.10738	-0.642817	5.03466e-07	9.46081e-06
Cs6g20120	1.04996	3.77432	5.06401e-07	9.4985e-06
Cs1g02580	-1.65821	1.92193	5.22796e-07	9.78806e-06
orange1.1t00454	-1.1986	3.24209	5.35301e-07	1.0013e-05
Cs5g13070	1.18039	3.73318	5.63559e-07	1.05221e-05
Cs6g05440	2.81568	1.16905	5.64062e-07	1.05221e-05
Cs7g17750	5.37357	-0.511611	5.67688e-07	1.05801e-05
Cs3g01530	1.22091	5.94778	5.75363e-07	1.07134e-05
Cs8g19500	1.26875	2.86956	5.92411e-07	1.09908e-05
Cs1g15970	-1.21763	7.51823	5.97171e-07	1.1059e-05
Cs4g18220	-1.80403	1.85864	5.99669e-07	1.10952e-05
Cs2g24290	1.20009	7.00142	6.30905e-07	1.16521e-05
Cs5g25850	1.51607	1.99198	6.45584e-07	1.19124e-05
Cs3g11620	-1.30941	4.20872	6.57025e-07	1.21126e-05
orange1.1t01821	-4.10431	-0.841875	6.59097e-07	1.21399e-05
Cs6g11940	1.01148	8.86753	6.64024e-07	1.22196e-05
Cs7g08690	1.23963	2.92233	6.70288e-07	1.23238e-05
Cs5g22710	-1.24002	3.28211	7.02437e-07	1.28917e-05
Cs7g25890	1.22056	4.17179	7.04359e-07	1.29114e-05
Cs2g22690	6.92784	-0.787455	7.06847e-07	1.29328e-05
Cs2g19300	-1.80783	4.99658	7.3259e-07	1.3373e-05
Cs2g17100	-2.76341	0.733088	7.37019e-07	1.34351e-05
Cs2g20580	-1.45235	3.29779	7.37303e-07	1.34351e-05
Cs8g06060	1.48637	2.75619	7.64347e-07	1.39031e-05
Cs7g02060	-1.30646	3.55821	7.7183e-07	1.40267e-05
Cs1g03290	-2.96254	0.66968	7.7993e-07	1.41613e-05
Cs1g24730	-1.11781	4.87207	7.84453e-07	1.42308e-05
Cs2g05490	1.31303	2.93421	8.20021e-07	1.48235e-05
orange1.1t02418	1.55542	1.65265	8.45489e-07	1.52703e-05
Cs6g07140	-1.68564	1.85892	8.54639e-07	1.5422e-05
orange1.1t04803	-2.03086	3.51492	8.65969e-07	1.56126e-05
Cs2g30190	-2.74625	0.0200053	8.79839e-07	1.58487e-05
Cs2g17860	-1.66218	4.53698	8.85757e-07	1.59413e-05
Cs2g27460	2.0192	2.17275	8.97495e-07	1.61242e-05
Cs2g02660	-1.68295	1.82213	9.20118e-07	1.65016e-05
Cs3g11420	-1.34876	2.96711	9.21001e-07	1.65029e-05
orange1.1t03764	-1.29103	7.1058	9.24054e-07	1.65432e-05
Cs1g03960	-1.73289	3.14505	9.3766e-07	1.67428e-05
Cs3g20300	-2.40887	1.44635	9.46751e-07	1.68762e-05
Cs7g13290	-1.51891	2.41916	9.61071e-07	1.71159e-05
Cs3g16490	-2.23216	1.69191	9.69194e-07	1.72456e-05
Cs5g33940	-1.12274	3.54373	9.89501e-07	1.75916e-05
Cs2g09310	4.62958	-0.0188815	1.00423e-06	1.78226e-05
Cs5g32090	1.58238	2.98148	1.01287e-06	1.79602e-05
Cs1g09635	-1.06417	3.60504	1.01843e-06	1.80275e-05
Cs1g23460	1.10824	3.61803	1.03419e-06	1.82432e-05
Cs5g18010	2.61764	5.2984	1.0737e-06	1.88913e-05
Cs8g08010	-4.4449	-0.579054	1.09295e-06	1.9197e-05
Cs5g05300	-1.55148	3.51448	1.10763e-06	1.94254e-05
Cs7g30970	1.83001	2.42291	1.10785e-06	1.94254e-05
Cs4g19300	2.06893	2.03942	1.13083e-06	1.97943e-05
Cs7g11415	6.39712	-1.19421	1.13267e-06	1.98096e-05
Cs2g16260	1.45709	9.93283	1.1566e-06	2.02109e-05
Cs5g15530	-2.45807	0.42012	1.26745e-06	2.20537e-05
Cs2g10720	2.45841	2.17726	1.30653e-06	2.26677e-05
Cs4g01490	-2.87525	0.679114	1.30717e-06	2.26677e-05
Cs1g24210	-1.71339	1.44147	1.312e-06	2.27321e-05
Cs2g22660	3.60025	2.4469	1.32974e-06	2.30005e-05
Cs9g18760	4.6111	-0.470488	1.36212e-06	2.35406e-05
Cs1g13290	-2.16681	2.29569	1.49641e-06	2.57526e-05
Cs9g06010	2.64443	0.540444	1.55588e-06	2.66638e-05
orange1.1t01694	-1.73138	4.56431	1.58273e-06	2.71013e-05
orange1.1t02794	-3.58626	-0.266229	1.59268e-06	2.72488e-05
Cs2g03330	-1.52777	3.87034	1.59587e-06	2.72805e-05
Cs7g17670	-1.76747	1.73696	1.63564e-06	2.7937e-05
Cs4g07730	1.51201	1.9317	1.70342e-06	2.90462e-05
Cs2g27640	-1.66315	2.26966	1.71664e-06	2.92472e-05
Cs5g09460	-1.70738	1.41437	1.7626e-06	2.99553e-05
Cs7g09540	-4.81714	1.93157	1.78054e-06	3.02351e-05
Cs8g17830	-3.05517	0.660692	1.80532e-06	3.05998e-05
Cs8g08990	-1.44188	2.53498	1.81292e-06	3.0683e-05
Cs7g17600	-1.23208	4.14279	1.81694e-06	3.07256e-05
orange1.1t03247	-6.18021	-1.33743	1.84818e-06	3.12282e-05
Cs9g06160	2.03835	1.5912	1.8817e-06	3.1742e-05
orange1.1t01837	1.18234	2.8301	1.92919e-06	3.24895e-05
Cs8g18300	-1.26875	4.11465	1.97903e-06	3.32468e-05
orange1.1t03632	1.20685	3.44572	1.99273e-06	3.34494e-05
Cs3g10710	-2.24749	0.633175	2.00796e-06	3.36139e-05
Cs9g13100	-1.05609	3.56635	2.00911e-06	3.36139e-05
orange1.1t00156	-1.33082	2.51202	2.03513e-06	3.39937e-05
orange1.1t01159	3.04927	0.446444	2.0394e-06	3.40372e-05
Cs5g33440	1.22772	2.62172	2.10107e-06	3.50093e-05
Cs7g24340	-1.36279	3.46064	2.11429e-06	3.52009e-05
Cs2g24960	-1.11718	3.09111	2.12544e-06	3.53578e-05
orange1.1t03053	-3.56155	-0.84174	2.1722e-06	3.60183e-05
orange1.1t01918	-1.1367	2.8471	2.17571e-06	3.60473e-05
Cs2g14610	1.00364	3.67346	2.19483e-06	3.63347e-05
Cs7g08350	-1.3744	2.08617	2.27623e-06	3.7591e-05
Cs2g07730	6.14574	-1.37291	2.28121e-06	3.76428e-05
Cs3g03590	1.89141	4.98468	2.28338e-06	3.76481e-05
Cs4g01480	-1.8167	1.49413	2.32416e-06	3.82896e-05
Cs6g11570	-3.70366	2.37564	2.32829e-06	3.83268e-05
Cs5g29320	-1.73114	1.71055	2.3309e-06	3.83389e-05
Cs2g20400	-3.39683	-0.41421	2.33565e-06	3.83862e-05
Cs1g19400	1.57548	2.61977	2.47194e-06	4.04958e-05
Cs4g01920	1.01921	3.35404	2.56881e-06	4.19818e-05
Cs3g01900	1.382	2.32088	2.61143e-06	4.26444e-05
Cs6g09940	-1.15622	9.80703	2.62017e-06	4.2753e-05
Cs9g01710	-3.02213	0.117212	2.64246e-06	4.30479e-05
Cs2g13910	-1.51922	8.14826	2.65854e-06	4.32753e-05
Cs2g13140	6.72236	-0.948248	2.68667e-06	4.36984e-05
Cs1g09010	1.05488	3.89686	2.71448e-06	4.40382e-05
orange1.1t05409	-1.43895	1.82652	2.71617e-06	4.40382e-05
Cs4g16770	2.56443	5.18947	2.7191e-06	4.40507e-05
Cs8g03480	4.01249	0.790909	2.75129e-06	4.45369e-05
Cs7g16790	2.55505	0.148328	2.82053e-06	4.56216e-05
Cs3g23780	2.46468	-0.112082	2.90348e-06	4.68151e-05
Cs7g30680	-1.82472	1.67908	2.93986e-06	4.73009e-05
Cs3g11280	1.10696	3.89181	2.94102e-06	4.73009e-05
Cs6g06650	2.85149	1.34693	2.96689e-06	4.76496e-05
Cs8g04860	1.07716	3.21882	2.97391e-06	4.7725e-05
Cs8g10300	5.26857	0.0815694	3.0049e-06	4.81467e-05
Cs4g05250	-2.50001	2.96901	3.01119e-06	4.82098e-05
Cs4g15280	-1.22488	6.15573	3.02052e-06	4.82968e-05
Cs3g18750	4.24169	-0.762428	3.09546e-06	4.94042e-05
Cs2g01210	-1.60592	3.77033	3.1326e-06	4.99578e-05
Cs4g18050	-1.00951	5.28061	3.17458e-06	5.05485e-05
Cs6g04580	-1.40391	2.59863	3.28059e-06	5.21959e-05
Cs9g10730	-4.58392	-1.09955	3.41225e-06	5.42483e-05
orange1.1t02606	1.2527	4.0652	3.42378e-06	5.43895e-05
orange1.1t01434	1.15029	3.44184	3.48848e-06	5.53312e-05
Cs6g16900	-1.15521	4.06497	3.49641e-06	5.5414e-05
orange1.1t01968	-2.04729	1.64619	3.6359e-06	5.75355e-05
Cs1g13620	1.01	9.53288	3.67838e-06	5.81178e-05
Cs8g03750	1.01763	3.62683	3.70115e-06	5.84324e-05
Cs3g08320	2.63068	-0.210601	3.76997e-06	5.93813e-05
orange1.1t03629	1.61455	1.36938	3.79883e-06	5.9744e-05
Cs5g23950	1.50449	3.12286	3.88437e-06	6.09954e-05
Cs4g03490	3.59892	-0.83913	3.93999e-06	6.18212e-05
Cs5g27990	-6.07074	-1.41331	3.95096e-06	6.19459e-05
orange1.1t00354	1.27168	3.09729	4.07398e-06	6.3699e-05
Cs2g22810	3.46614	0.0101315	4.07524e-06	6.3699e-05
Cs2g28370	2.07921	3.74505	4.09201e-06	6.39123e-05
Cs8g02230	3.05058	0.872562	4.22115e-06	6.57785e-05
Cs8g14600	1.32028	3.55994	4.24805e-06	6.61473e-05
Cs9g13580	3.32857	-0.73773	4.29447e-06	6.67176e-05
Cs2g26640	-2.16109	0.330225	4.33296e-06	6.72645e-05
Cs7g15050	-1.43204	2.31464	4.38958e-06	6.80917e-05
Cs2g16200	-1.78702	2.11262	4.40635e-06	6.83001e-05
Cs2g29090	-6.07036	-1.41338	4.55154e-06	7.03905e-05
Cs4g16160	-2.44674	-0.100043	4.55524e-06	7.03945e-05
Cs9g17680	-1.26886	3.56687	4.61859e-06	7.12657e-05
orange1.1t03508	2.48947	0.48911	4.68183e-06	7.21104e-05
Cs6g13530	2.67658	0.413621	4.82074e-06	7.4161e-05
Cs2g05280	-1.07715	6.60527	5.11814e-06	7.85588e-05
Cs8g07020	1.20802	3.51168	5.15034e-06	7.89938e-05
Cs5g09930	-1.34574	1.94906	5.15495e-06	7.90052e-05
Cs4g11610	-2.93395	-0.557213	5.40248e-06	8.26131e-05
Cs5g06100	-2.4984	0.130984	5.60075e-06	8.54532e-05
orange1.1t02204	1.35338	3.87856	5.60917e-06	8.55178e-05
Cs8g09070	-5.14924	-0.669367	5.6466e-06	8.5836e-05
Cs9g08250	4.70348	-1.03533	5.64683e-06	8.5836e-05
Cs7g06720	-2.27448	2.2068	5.66633e-06	8.60046e-05
Cs3g26730	-2.15143	0.614401	5.74559e-06	8.7041e-05
orange1.1t02228	2.60775	-0.353372	5.74738e-06	8.7041e-05
Cs5g10190	-1.25442	2.7611	5.77536e-06	8.73999e-05
Cs3g25130	-2.15193	0.982517	6.01719e-06	9.09249e-05
Cs2g29790	3.63371	-0.813224	6.04475e-06	9.12739e-05
Cs4g10140	-1.02124	3.88633	6.46156e-06	9.72803e-05
Cs6g15560	-2.49923	0.883165	6.51764e-06	9.80524e-05
orange1.1t01388	2.52464	0.647356	6.55194e-06	9.84939e-05
orange1.1t00272	-4.13969	-0.815854	6.58688e-06	9.87817e-05
Cs8g18970	-1.04228	3.36417	6.59028e-06	9.87817e-05
Cs7g18660	-3.52577	-0.868199	6.60865e-06	9.89609e-05
Cs7g17550	-1.45246	2.76929	6.61191e-06	9.89609e-05
orange1.1t01339	-1.72394	4.00883	6.6355e-06	9.91885e-05
Cs8g19230	-1.0781	5.05805	6.63682e-06	9.91885e-05
Cs2g29120	1.05327	6.40053	6.78118e-06	0.000101243
Cs7g32410	2.32342	1.86536	6.78419e-06	0.000101243
Cs7g05660	3.26021	-0.787651	6.88955e-06	0.000102591
Cs4g11440	1.07011	4.36391	7.0678e-06	0.000105015
orange1.1t05622	1.35364	2.90126	7.17233e-06	0.000106321
Cs7g25760	2.54537	1.22746	7.17645e-06	0.000106321
Cs9g01160	-1.12265	3.15991	7.3083e-06	0.000108039
Cs3g27500	6.60772	-1.03584	7.43032e-06	0.000109605
Cs9g09120	-3.29145	-0.494172	7.47894e-06	0.000110243
orange1.1t03246	-3.69849	-0.740674	7.5181e-06	0.00011074
orange1.1t04113	-2.75257	-0.514713	7.82292e-06	0.000115064
Cs7g13010	-3.31145	0.22134	7.92999e-06	0.000116472
Cs7g27350	2.50658	1.43096	7.94042e-06	0.000116541
Cs1g03390	-3.7928	-0.669075	7.95089e-06	0.000116611
Cs5g34700	1.43134	1.75175	8.02341e-06	0.00011759
Cs5g34830	1.38493	5.04096	8.06307e-06	0.000118087
Cs5g21870	1.82567	3.15047	8.07846e-06	0.000118228
Cs8g05840	-2.78151	-0.494043	8.29564e-06	0.000120887
Cs2g16240	2.7622	-0.532888	8.43563e-06	0.000122839
Cs3g23560	1.51717	4.293	8.66787e-06	0.000125695
Cs8g05940	-1.61074	1.49971	8.67354e-06	0.000125695
orange1.1t05275	3.05844	0.638657	8.68256e-06	0.000125716
Cs9g07210	2.79856	-0.210794	8.68854e-06	0.000125716
Cs2g30660	-1.51796	1.53546	8.70204e-06	0.000125823
Cs7g21330	2.29049	2.9058	8.81365e-06	0.000127346
Cs6g15300	-1.13934	9.47105	8.96521e-06	0.000129445
Cs5g17080	1.63648	1.081	9.04004e-06	0.000130433
Cs5g11010	2.03382	0.334461	9.21821e-06	0.000132629
Cs5g18420	1.63626	1.45207	9.37147e-06	0.00013474
Cs5g06000	-1.03472	4.00548	9.58465e-06	0.000137322
orange1.1t02445	-3.36137	0.117466	9.645e-06	0.00013809
Cs3g11590	-1.1852	3.55505	9.89511e-06	0.000141571
Cs6g07450	6.89427	-0.813274	1.01305e-05	0.000144736
Cs2g09770	-1.21401	2.89256	1.02781e-05	0.000146641
Cs9g07280	5.52017	-0.391058	1.04978e-05	0.000149671
orange1.1t02243	-1.58042	3.89635	1.05836e-05	0.000150789
Cs9g07540	-1.22304	2.35261	1.08827e-05	0.000154941
Cs5g22390	-1.81571	0.604851	1.12476e-05	0.000159804
Cs8g03430	3.88836	-0.620393	1.17697e-05	0.000166874
Cs5g03480	-3.45065	-0.92266	1.18344e-05	0.000167558
Cs1g21010	4.4823	-1.19448	1.19062e-05	0.000168459
Cs6g07240	1.74558	2.2302	1.21967e-05	0.000172091
Cs2g25080	2.26037	0.560841	1.22267e-05	0.000172278
orange1.1t03417	1.33152	3.84253	1.24491e-05	0.00017517
orange1.1t01353	-1.30428	2.36975	1.26796e-05	0.000177801
Cs1g19350	-1.83597	1.2208	1.29641e-05	0.000181666
Cs7g29030	-3.23632	-0.535952	1.30073e-05	0.000182146
Cs3g26240	-1.24475	6.35134	1.31114e-05	0.000183478
Cs3g17520	1.08399	8.34274	1.31285e-05	0.000183592
Cs3g14730	-2.49971	3.0555	1.33634e-05	0.000186611
orange1.1t01992	-1.43282	1.94158	1.38289e-05	0.000191943
Cs8g19460	1.11445	6.57169	1.47262e-05	0.000203129
orange1.1t04768	-1.91731	2.98269	1.47342e-05	0.000203129
Cs5g33170	-1.29927	3.36188	1.48354e-05	0.000204387
Cs1g10900	-1.62636	0.851685	1.52756e-05	0.000210309
orange1.1t04573	-2.10222	2.74423	1.53754e-05	0.000211398
Cs8g19350	3.33254	-0.280018	1.5405e-05	0.000211663
Cs8g02590	-1.9299	1.20162	1.59073e-05	0.000218126
orange1.1t02820	1.50824	1.85331	1.5941e-05	0.000218441
Cs3g22600	1.36991	2.85699	1.61635e-05	0.00022075
Cs5g23250	1.0431	4.52682	1.63346e-05	0.000222937
Cs9g17780	-1.46469	1.45796	1.67602e-05	0.000228441
Cs2g10910	-3.12134	1.45061	1.70729e-05	0.000232394
orange1.1t03618	5.97095	-1.49174	1.73259e-05	0.000235525
Cs6g14560	2.65672	0.550511	1.7635e-05	0.000239566
orange1.1t00742	1.84331	2.24858	1.78531e-05	0.000242369
Cs7g01750	-2.22038	0.090692	1.79513e-05	0.000243539
Cs4g11070	2.43569	-0.353417	1.80511e-05	0.000244731
Cs9g18850	-1.26435	2.80333	1.82832e-05	0.00024755
Cs1g08110	-2.23335	0.776321	1.84552e-05	0.000249547
Cs7g10500	-1.65432	0.96818	1.85687e-05	0.000250752
Cs7g07980	1.59834	2.70102	1.88608e-05	0.00025436
Cs6g18430	-1.0923	3.92472	1.95214e-05	0.000262922
Cs6g18090	1.45581	4.26765	1.99665e-05	0.000268543
Cs8g08920	-2.39711	1.68737	1.99782e-05	0.000268543
Cs4g18450	1.05945	7.16971	2.02295e-05	0.000271563
Cs2g20110	4.38347	-1.26337	2.08649e-05	0.00027936
orange1.1t04766	-2.47369	0.0201561	2.09091e-05	0.000279769
orange1.1t04499	-1.784	3.03876	2.10353e-05	0.00028109
Cs1g23760	-3.66471	-0.765216	2.11552e-05	0.000282507
Cs3g08550	2.92625	0.346023	2.15535e-05	0.000287263
Cs2g07660	-2.05719	2.81647	2.16034e-05	0.000287553
Cs5g13650	-6.07013	-1.41341	2.24574e-05	0.000298532
Cs8g15320	-1.7546	1.42525	2.27366e-05	0.000301851
Cs5g33730	-1.1899	2.08987	2.30519e-05	0.000305243
orange1.1t01118	-1.5095	1.48952	2.33247e-05	0.000308656
Cs1g08130	-1.61687	2.90609	2.34021e-05	0.00030948
Cs2g13320	-1.38321	2.52242	2.36872e-05	0.000313047
Cs1g25670	1.45317	1.23217	2.40049e-05	0.000317042
Cs3g02870	-1.07385	2.68164	2.41512e-05	0.000318767
Cs6g16450	-1.82262	0.565987	2.45921e-05	0.000323959
Cs1g13900	-2.44629	-0.100187	2.46172e-05	0.000324082
Cs3g11350	1.23598	2.4059	2.53802e-05	0.000333268
Cs7g05210	-1.27257	2.83896	2.54627e-05	0.000333955
Cs1g16030	-3.03661	-0.922581	2.55499e-05	0.000334851
Cs1g11080	2.59296	0.425022	2.55798e-05	0.000335028
Cs2g12080	-1.18853	5.85802	2.56646e-05	0.000335709
Cs9g10190	-5.8893	-1.53519	2.57602e-05	0.000336743
Cs2g26760	-1.14063	2.30625	2.58718e-05	0.000337962
Cs9g03040	1.18972	2.05649	2.58897e-05	0.000337962
Cs3g12080	-3.5074	-0.579019	2.59975e-05	0.000338978
orange1.1t01258	1.37047	1.86047	2.6472e-05	0.000344507
Cs3g22910	-2.23206	4.08832	2.72501e-05	0.000354182
Cs2g24300	1.21645	2.45536	2.77694e-05	0.000360702
Cs1g17550	1.36261	3.10247	2.78259e-05	0.000361206
Cs5g11890	-2.63603	-0.180489	2.84577e-05	0.000368006
Cs6g15750	-1.75685	1.16327	2.88951e-05	0.00037302
Cs2g28870	-4.24476	-1.3374	2.91914e-05	0.000376304
Cs8g15600	4.10406	-0.86583	2.95102e-05	0.000380063
orange1.1t01526	2.32861	-0.316545	2.95673e-05	0.000380252
Cs8g04300	2.53246	0.0380811	2.97962e-05	0.000382652
Cs5g22060	1.16229	3.37995	3.03271e-05	0.000388982
Cs1g08150	-1.89647	1.17648	3.0822e-05	0.000394341
Cs1g01130	7.26464	-0.511858	3.11475e-05	0.000397758
Cs5g23550	-5.82291	-1.57829	3.20635e-05	0.000407926
Cs2g16510	2.26992	0.251001	3.21261e-05	0.000408469
Cs4g05890	-2.18951	3.31073	3.27834e-05	0.000416567
Cs6g11040	1.35028	3.02488	3.29251e-05	0.000418108
Cs7g03710	-1.11334	2.95674	3.29896e-05	0.000418667
Cs3g06300	1.11692	2.53054	3.38348e-05	0.000428065
Cs3g19920	3.48678	-0.920297	3.40056e-05	0.000429694
Cs7g30690	-2.11717	0.0905963	3.47365e-05	0.000437847
Cs3g09280	-1.17559	4.93711	3.47651e-05	0.000437937
Cs6g17340	1.61748	2.23886	3.48365e-05	0.000438567
Cs7g04900	-1.69051	1.05512	3.48799e-05	0.000438732
orange1.1t03242	2.48827	1.18167	3.48926e-05	0.000438732
Cs2g06560	-3.22318	-0.790276	3.4976e-05	0.000439241
Cs5g05590	6.61403	0.570665	3.50503e-05	0.000439903
Cs5g26670	1.0672	3.04771	3.53164e-05	0.000442428
orange1.1t02046	-2.17391	1.11662	3.54271e-05	0.000443544
Cs1g18380	-1.08678	5.808	3.55296e-05	0.000444554
Cs2g01150	-2.32558	0.944869	3.57274e-05	0.000446756
Cs8g14510	-4.10407	-0.841892	3.59599e-05	0.000449389
orange1.1t00681	-1.71381	0.442467	3.63908e-05	0.000453389
Cs5g08400	2.27948	0.738187	3.65924e-05	0.000455345
Cs5g09090	5.90823	-1.53353	3.7273e-05	0.000463532
Cs5g11840	2.88215	-0.620338	3.74137e-05	0.000464639
Cs2g18150	-4.29853	-1.3009	3.74302e-05	0.000464639
Cs6g15350	-2.14072	0.604438	3.75563e-05	0.000465922
Cs5g04320	3.57554	0.413866	3.78195e-05	0.000468618
Cs3g13100	1.58403	0.79814	3.88147e-05	0.000479787
Cs7g14430	-1.25375	2.33541	3.92716e-05	0.000484555
Cs4g13490	6.64653	-1.0061	3.93446e-05	0.00048487
orange1.1t00401	-3.24334	-1.06839	4.01332e-05	0.000494291
Cs3g01590	-3.28724	-1.03803	4.05612e-05	0.000498961
Cs4g20560	-1.6041	2.88782	4.07062e-05	0.000500444
Cs2g18010	-4.18918	-1.3748	4.0859e-05	0.00050202
Cs4g02690	6.19976	-1.33533	4.14398e-05	0.000507935
Cs2g06550	-4.34969	-1.26527	4.1887e-05	0.000512935
Cs7g11810	-1.83599	2.48866	4.52868e-05	0.000551781
orange1.1t05425	-1.51725	1.27658	4.58315e-05	0.000558086
orange1.1t04730	-1.43838	1.12417	4.60906e-05	0.000560848
Cs5g12270	-1.50222	1.11738	4.64474e-05	0.000564576
Cs5g22260	-2.95655	0.29425	4.6625e-05	0.000566398
Cs1g03070	-2.17032	0.270759	4.67014e-05	0.000566986
Cs2g02880	-2.43622	-0.00923007	4.67566e-05	0.000566986
orange1.1t01708	-1.24288	2.29745	4.68125e-05	0.000567328
Cs6g17090	1.02462	7.30278	4.70675e-05	0.00057008
Cs4g07400	1.25354	1.79426	4.73952e-05	0.00057337
Cs1g21060	-1.66847	1.28854	4.78035e-05	0.000577968
Cs5g19110	-2.46245	-0.433488	4.78405e-05	0.000578073
Cs5g29300	3.2353	-1.09723	4.81283e-05	0.000581206
Cs1g24200	-2.42225	-0.338009	4.8221e-05	0.000581983
Cs8g07230	-1.02902	8.17363	4.92649e-05	0.00059365
orange1.1t05893	1.29827	2.53847	4.95092e-05	0.000596123
Cs5g07230	1.39894	5.04712	4.96946e-05	0.000598002
Cs2g03950	-1.18554	4.07388	5.01822e-05	0.000603514
Cs2g12290	-1.4859	1.78037	5.05321e-05	0.000606653
Cs4g14510	-1.64394	1.94494	5.06687e-05	0.000607935
Cs2g14400	-1.46456	2.21145	5.07853e-05	0.000608976
Cs5g32635	-1.01365	5.09256	5.12428e-05	0.000613743
Cs5g31030	4.27979	-1.33526	5.12926e-05	0.000613945
Cs2g10310	2.40546	0.424491	5.19595e-05	0.000620509
Cs5g09800	-1.75803	1.40366	5.24302e-05	0.0006254
Cs8g17960	-1.03161	5.98236	5.26294e-05	0.000627044
Cs7g26870	6.03417	-1.45065	5.31176e-05	0.000632124
Cs1g19430	3.9445	-0.576218	5.37611e-05	0.000639038
orange1.1t03231	3.78597	-1.09731	5.48305e-05	0.000650993
Cs7g10000	-1.35139	1.58541	5.59284e-05	0.000662106
Cs3g06260	1.31958	1.75137	5.60324e-05	0.000662952
Cs8g02370	-1.66308	0.661554	5.65647e-05	0.00066809
Cs3g10190	-3.02574	-0.692535	5.77335e-05	0.000680272
Cs8g08810	-3.24342	-1.06836	5.78192e-05	0.000680549
orange1.1t02353	-2.02053	-0.0535029	5.8555e-05	0.000688814
orange1.1t00031	-1.21485	2.59425	5.88651e-05	0.000692062
Cs3g04020	-1.6063	0.733784	5.98191e-05	0.000701262
Cs6g04110	-1.47857	2.01527	6.07776e-05	0.000711683
Cs3g04140	-1.84464	1.16992	6.13014e-05	0.000717405
Cs6g14430	1.18556	1.84419	6.18598e-05	0.000723113
Cs1g04470	6.19919	-1.33541	6.19541e-05	0.000723601
Cs7g27330	1.43162	2.16565	6.23306e-05	0.000726953
Cs5g10870	1.13286	2.12857	6.3276e-05	0.000737395
Cs2g18290	1.83756	0.980478	6.32981e-05	0.000737395
orange1.1t03628	2.03692	0.14846	6.44753e-05	0.000749401
Cs8g10860	-1.6342	4.14993	6.4605e-05	0.000750482
Cs6g07730	-1.46934	1.04125	6.47456e-05	0.000751689
Cs2g16150	1.02664	4.29943	6.54523e-05	0.000759462
orange1.1t03504	-1.51227	2.92373	6.61917e-05	0.000766736
orange1.1t05971	-1.28816	2.31773	6.6251e-05	0.000766988
Cs9g14500	6.03425	-1.45064	6.79521e-05	0.000785348
Cs7g26690	-2.47164	-0.301344	6.87584e-05	0.000792874
Cs9g04200	-1.55009	3.34764	7.01099e-05	0.000806639
Cs3g24530	-1.34965	1.53055	7.06356e-05	0.000811773
Cs6g10940	-1.26743	1.96045	7.11046e-05	0.000816704
Cs7g09910	1.98993	0.46779	7.15577e-05	0.000821447
Cs6g07850	-2.81688	-0.841653	7.20679e-05	0.000826376
Cs5g32540	-1.33047	2.22089	7.21143e-05	0.000826444
Cs8g18640	1.1185	4.17494	7.27239e-05	0.000832964
Cs6g15330	-1.1777	2.46804	7.30672e-05	0.000835959
Cs3g15080	1.18565	1.94661	7.32552e-05	0.000837173
Cs9g09740	-1.45266	4.37723	7.33314e-05	0.000837407
Cs5g10150	-1.52193	0.84381	7.36049e-05	0.000839292
Cs3g20790	2.01691	0.13476	7.42007e-05	0.000845615
Cs7g16240	-1.16103	3.25806	7.42474e-05	0.000845676
Cs5g28190	-1.15756	3.02778	7.58464e-05	0.000862447
Cs5g17870	-1.31606	3.12119	7.61003e-05	0.000864853
Cs6g09660	-3.15117	-1.13098	7.70126e-05	0.000872795
Cs7g29900	1.40965	1.72056	7.92258e-05	0.000895891
Cs6g02000	-5.60497	-1.71565	7.97443e-05	0.000901256
orange1.1t01577	-3.50802	-1.2652	7.9839e-05	0.000901828
Cs7g03390	-2.0149	0.157862	8.06224e-05	0.000910174
Cs3g21340	2.18286	1.37142	8.06804e-05	0.000910326
Cs9g05220	1.3923	2.75286	8.15733e-05	0.000918879
Cs5g32150	-1.64529	2.29317	8.31242e-05	0.000933777
Cs5g28620	-1.87264	0.183903	8.50207e-05	0.000951422
orange1.1t01934	-1.45702	1.34749	8.50802e-05	0.000951567
orange1.1t05700	1.25204	2.80279	8.67541e-05	0.000968837
Cs9g14600	-1.35165	2.91598	8.67665e-05	0.000968837
Cs1g15360	-5.75361	-1.62267	8.97444e-05	0.000997729
Cs3g26140	-6.01187	-1.45293	9.14785e-05	0.00101425
Cs5g25790	1.89659	1.79117	9.31809e-05	0.00103145
Cs6g21160	-1.62817	1.55549	9.38447e-05	0.00103711
Cs9g16620	-1.10326	5.07372	9.43339e-05	0.00104083
Cs2g31090	-2.51939	0.234135	9.52457e-05	0.00104976
orange1.1t06019	1.08962	5.09277	9.61267e-05	0.00105776
Cs5g31280	-1.28457	1.35335	9.64162e-05	0.0010598
Cs4g07940	1.17244	4.98589	9.66885e-05	0.00106165
orange1.1t01539	-2.16769	-0.301329	9.71944e-05	0.00106621
Cs8g14810	-2.19022	0.144512	9.72078e-05	0.00106621
Cs8g20850	3.26362	-0.334372	9.78999e-05	0.0010715
Cs2g17980	-1.36081	5.81363	9.84561e-05	0.00107701
Cs8g04660	-1.80548	0.30717	0.000100014	0.00109347
Cs2g13310	-2.35836	0.270617	0.000100501	0.00109821
orange1.1t03581	2.06624	-0.210779	0.000101274	0.00110547
Cs6g18360	1.32224	3.83585	0.000101762	0.00110902
Cs5g24260	1.65893	0.379943	0.000102363	0.0011141
Cs6g05320	6.29935	-1.26342	0.000102756	0.00111748
Cs5g20520	1.04788	6.78652	0.000103161	0.00112128
Cs7g08890	-5.88855	-1.5353	0.000103455	0.00112387
orange1.1t02600	-1.31166	2.47047	0.000103813	0.00112716
Cs9g13050	-1.38089	2.4028	0.000105831	0.00114665
Cs7g11770	-1.65824	0.536059	0.000106701	0.00115484
Cs3g25000	-1.11852	4.708	0.000108178	0.00117021
Cs5g28150	1.11145	2.86018	0.000110745	0.00119481
Cs6g18540	-1.64561	1.3923	0.000111346	0.00120003
Cs7g31000	-1.14177	9.13727	0.000112061	0.0012052
Cs2g07250	5.97392	-1.49132	0.000113511	0.00121695
Cs1g03020	1.77086	0.675002	0.000115025	0.00123254
Cs7g11920	-1.66664	1.79274	0.000115844	0.00124067
orange1.1t05092	1.21575	4.26722	0.00011799	0.00126167
Cs5g06350	2.40304	0.729008	0.000119005	0.00127186
orange1.1t01718	-1.47744	1.29473	0.000119709	0.00127804
Cs7g08830	-1.01654	3.28827	0.000121147	0.00129137
Cs1g15990	-4.07078	-1.45272	0.000121267	0.00129198
Cs1g14500	-1.28025	2.35253	0.000122963	0.001308
Cs3g09140	1.45136	1.6146	0.000124104	0.00131876
orange1.1t03359	3.07542	-0.919997	0.000125339	0.00133051
Cs2g26290	-1.93258	-0.115427	0.000126605	0.00134185
orange1.1t05024	-4.53983	-1.13109	0.000127259	0.00134809
Cs2g21940	-1.0799	4.69836	0.000128968	0.00136478
Cs7g31730	6.52679	-1.09716	0.000130924	0.00138262
Cs7g22450	-1.36187	1.77201	0.000132692	0.00139912
Cs5g01880	-4.24473	-1.33742	0.000133656	0.0014071
Cs7g15300	2.39904	0.275167	0.00013424	0.0014118
Cs9g06490	3.02172	0.848789	0.000135377	0.00142229
Cs4g09090	1.95663	1.10188	0.000135699	0.00142453
Cs9g17750	-1.68122	1.98574	0.00013573	0.00142453
Cs7g02970	2.66842	1.32931	0.000136691	0.00143241
Cs9g04630	-2.06625	1.55955	0.00013686	0.00143346
Cs5g31180	-2.74608	-0.692388	0.000140938	0.0014739
Cs6g20900	1.51385	1.12866	0.000141091	0.00147474
Cs9g09050	1.14371	2.12525	0.000142031	0.00148382
Cs1g21600	1.02865	3.64495	0.000142322	0.00148609
Cs9g15760	6.08813	-1.41164	0.000145634	0.00151372
Cs2g17110	1.11069	2.36631	0.000147204	0.00152771
Cs3g20070	-1.37474	1.87128	0.000152151	0.00157558
Cs5g12070	-1.66122	0.495194	0.000152202	0.00157558
Cs1g13350	-2.12737	-0.433364	0.000154423	0.00159373
Cs2g14150	1.96857	-0.194142	0.000156044	0.00160802
Cs3g06280	1.20683	2.54313	0.000157917	0.00162382
Cs1g09250	1.20233	2.54803	0.00015794	0.00162382
Cs6g08930	-1.20738	1.94547	0.000157974	0.00162382
Cs5g06380	-1.5502	1.20229	0.000159316	0.00163351
orange1.1t02795	1.10304	4.74697	0.000160062	0.00163952
Cs5g29880	6.1464	-1.3728	0.000162106	0.00165547
Cs3g02610	-5.68146	-1.66838	0.000167734	0.00171038
Cs7g07570	-1.69349	0.11808	0.000168587	0.00171822
Cs5g15220	-2.99671	-0.950503	0.000169104	0.00172092
Cs5g03570	-1.00585	4.01182	0.000170075	0.00172822
orange1.1t02697	-1.96388	0.364728	0.000172558	0.00175172
Cs8g03550	1.77968	1.06684	0.000172883	0.00175414
Cs2g05180	-2.84568	-0.148227	0.000173314	0.00175589
Cs9g04050	1.949	-0.128383	0.0001735	0.00175604
Cs2g31040	-2.33284	1.45165	0.000173647	0.00175666
orange1.1t03073	1.01021	3.73475	0.000173856	0.0017579
Cs8g20310	1.06168	3.56067	0.000176849	0.00178464
Cs2g06570	-1.35121	2.20193	0.000177317	0.00178759
Cs1g06060	1.25906	2.53649	0.000179004	0.00180282
Cs8g06590	3.23415	-1.09736	0.000179482	0.00180586
Cs1g20180	-1.56846	0.997851	0.000181797	0.00182825
Cs7g07210	2.82176	0.755368	0.000183462	0.00184409
Cs9g01430	1.60843	0.390972	0.000183574	0.00184431
Cs7g29760	-1.50069	4.51447	0.000186347	0.00187125
orange1.1t00851	1.08519	4.68796	0.000187211	0.001879
Cs1g23430	-1.17455	1.67523	0.000189638	0.00190243
Cs1g23770	-2.26062	-0.453281	0.000192522	0.00192947
Cs3g06250	1.25771	2.65024	0.000194177	0.0019451
Cs1g03210	-1.24095	2.16978	0.000194627	0.00194865
Cs3g05310	1.8316	1.81938	0.000194898	0.00195041
Cs2g20040	1.45355	1.81512	0.000195095	0.00195143
Cs1g06250	2.06564	-0.210979	0.000196606	0.00196366
orange1.1t01163	3.97501	-1.53362	0.000197338	0.00197001
orange1.1t00576	-2.43286	-0.740298	0.000200553	0.0019982
Cs5g28730	1.59557	0.903502	0.000201774	0.00200548
Cs4g18100	2.01816	0.322851	0.000204234	0.00202796
Cs7g23120	-1.67923	1.93669	0.000207461	0.002056
Cs3g13720	1.19396	1.60455	0.000209346	0.00207368
Cs3g16980	-1.03235	2.55055	0.000211879	0.00209572
orange1.1t05258	3.35887	0.97561	0.000213169	0.00210543
Cs4g04880	1.75253	0.134692	0.000214637	0.00211686
Cs8g12000	-1.01976	6.49628	0.00021511	0.0021205
Cs5g04670	-1.08014	2.65619	0.00022144	0.00217661
Cs7g19120	-1.71979	0.0770383	0.00022234	0.00218231
Cs2g18260	1.98667	0.413413	0.000225636	0.00221147
Cs6g20620	1.01911	3.78643	0.000226662	0.0022194
Cs8g19550	-1.20984	1.34187	0.000227031	0.00222191
orange1.1t04770	-5.43869	-1.81512	0.000227136	0.00222191
Cs3g01490	-3.00669	1.24462	0.000228486	0.00223299
Cs1g21430	-2.05226	1.74493	0.000233511	0.00227991
Cs1g07450	-2.00536	-0.413657	0.000238944	0.00232962
Cs6g15880	1.08986	5.47987	0.000241863	0.00235359
Cs5g21190	1.49291	1.8276	0.000247115	0.00240013
orange1.1t03347	-1.12897	2.99706	0.000247279	0.00240058
Cs2g22790	3.54651	-1.26304	0.000248201	0.00240838
orange1.1t02077	2.99796	-0.737944	0.000248552	0.00241065
orange1.1t02715	-1.11337	3.50948	0.000252268	0.00243859
Cs9g16870	-2.43432	-0.214141	0.000253051	0.00244385
Cs1g22000	-4.29858	-1.30089	0.000255201	0.00246113
Cs7g10510	-2.27262	1.46734	0.000259122	0.00249541
Cs1g05220	2.3522	-0.00505924	0.000260594	0.00250722
Cs7g11950	-1.84944	0.715834	0.000262901	0.00252823
Cs5g05410	2.16142	0.238656	0.000263818	0.00253585
Cs5g34770	-1.08669	2.21188	0.000264593	0.00253853
Cs1g12460	-1.50969	0.516091	0.000266299	0.0025537
orange1.1t00472	-1.01086	5.20182	0.000266476	0.0025542
orange1.1t04609	2.06935	0.238011	0.000270383	0.00258922
Cs6g21460	-3.18129	5.21241	0.000272316	0.00260529
Cs8g16430	-2.46835	-0.716162	0.000273999	0.00261894
Cs5g22400	-1.64786	0.442478	0.0002772	0.00264459
Cs9g08260	3.28201	-1.06583	0.000281107	0.00267812
orange1.1t00778	2.27131	-0.470417	0.000281884	0.00268426
Cs3g18780	6.40038	-1.19378	0.000283779	0.00270105
orange1.1t01956	1.014	3.13257	0.000284789	0.00270814
Cs2g05570	-1.09853	2.54832	0.000288822	0.0027414
Cs7g13660	1.2695	1.62371	0.000293128	0.00277839
Cs5g32740	1.90287	6.71954	0.000298396	0.00282179
Cs7g23810	-2.37833	-0.493943	0.000306941	0.00289323
Cs3g23530	-1.17696	1.55098	0.000308805	0.00290946
Cs2g12700	-2.05584	-0.283402	0.000312455	0.00293978
Cs5g14970	-1.04064	2.12068	0.000314784	0.00295897
Cs5g33680	-1.00075	2.3674	0.000315484	0.00296418
Cs7g28560	-1.2347	1.59037	0.000318919	0.00299234
orange1.1t05042	-2.16736	1.64092	0.000322025	0.00302009
Cs1g23720	-1.51667	1.85062	0.000323847	0.00303579
Cs8g03670	-3.00108	-1.23043	0.000324017	0.00303599
Cs4g14150	-3.87255	-1.57816	0.000325242	0.00304328
Cs8g10380	2.6077	-0.643387	0.000327636	0.00306288
Cs7g13830	-2.53221	-0.841491	0.000330453	0.00308216
Cs3g09175	-4.13084	-1.4133	0.00033237	0.00309863
Cs1g17390	-1.10361	5.8273	0.000337617	0.00314325
Cs7g10030	-1.19164	2.57017	0.000339268	0.00315718
Cs3g09170	-5.60474	-1.71568	0.000340455	0.00316535
Cs6g01740	-1.60986	0.998191	0.000349228	0.00323808
Cs3g12750	1.81653	-0.144618	0.000355532	0.00329056
Cs3g26230	1.2799	1.69373	0.000357073	0.00329939
orange1.1t05635	2.11586	-0.576284	0.000360261	0.0033268
orange1.1t02668	-2.96464	-0.535872	0.000364246	0.003353
Cs2g19430	-1.28089	1.98271	0.000369252	0.0033945
Cs2g30370	1.02274	2.24443	0.000369751	0.00339702
orange1.1t05515	5.77173	-1.62122	0.000369859	0.00339702
Cs1g23940	-2.43344	-0.740348	0.00037419	0.00343217
Cs9g18620	-1.21866	1.59495	0.000376912	0.00345404
Cs3g18110	1.36837	1.60896	0.000378393	0.0034645
Cs8g04000	-5.43891	-1.81509	0.000380047	0.00347498
Cs5g25010	1.10655	2.04566	0.00038089	0.00348113
Cs2g30800	1.0549	2.31148	0.00038337	0.00349911
Cs2g11560	-2.39762	-0.764946	0.000383736	0.00350089
Cs6g15710	-1.50769	1.27083	0.000388259	0.00353899
orange1.1t03780	-2.20117	-0.493679	0.000388822	0.00354255
Cs5g27370	-1.69664	-0.131351	0.000391452	0.00356333
Cs2g16290	-3.28108	-1.41318	0.000394164	0.00358642
Cs6g20850	2.27814	-0.353126	0.000401286	0.0036496
Cs7g13180	-1.0761	3.83218	0.000402675	0.00365897
orange1.1t04767	-1.68827	0.170952	0.00040515	0.00367656
Cs7g29550	1.82916	-0.0655588	0.000407449	0.00369251
orange1.1t05143	3.83392	-1.62104	0.000408087	0.00369502
Cs3g19660	-1.78658	0.89963	0.000417828	0.00377819
Cs1g26480	-1.00668	2.65181	0.000418505	0.00378265
Cs5g14090	3.32555	-1.03562	0.000427914	0.00385745
Cs5g10750	4.52937	-1.16124	0.000429266	0.00386794
Cs5g32780	2.77744	-0.892838	0.000430259	0.00387347
Cs6g14740	-1.33117	0.892063	0.000432857	0.00389343
orange1.1t03346	-3.19677	-1.09924	0.000437723	0.00393028
Cs2g18820	-1.45669	0.73374	0.000438163	0.0039325
Cs5g11490	1.62193	1.30516	0.000438905	0.00393517
Cs7g17470	-3.79982	-1.62253	0.000439038	0.00393517
Cs8g13950	-2.72871	-1.13097	0.000439892	0.0039411
Cs7g21940	1.06734	3.19759	0.000440304	0.00394306
Cs4g02060	-1.06632	1.63361	0.000443936	0.00396863
Cs9g01180	-4.83331	0.182755	0.000444161	0.00396891
Cs6g20450	-1.63088	0.131603	0.000453537	0.00404386
Cs2g09840	1.14445	3.65781	0.000459798	0.00409076
Cs1g21585	-1.10947	2.38654	0.000460649	0.00409477
Cs2g29360	-1.06354	2.68162	0.000462159	0.00410641
Cs7g17090	6.03028	-1.45116	0.000469577	0.00416146
Cs4g05200	-1.41963	6.22385	0.000470556	0.00416627
Cs5g07852	-5.34766	-1.86757	0.00047073	0.00416627
Cs4g19480	-1.22179	1.78123	0.00047174	0.0041734
orange1.1t03701	-1.72973	2.2133	0.000480464	0.00423957
Cs5g09080	-4.13148	-1.41321	0.000483573	0.00426359
Cs9g05300	-1.81437	-0.196901	0.000494967	0.00435252
Cs3g25940	-1.35264	1.35899	0.000500473	0.00439337
orange1.1t02853	1.07891	1.57498	0.00050124	0.00439822
Cs3g26680	-1.23405	2.46255	0.000504064	0.0044211
Cs1g11380	-1.52089	1.37013	0.00050665	0.00443617
Cs9g02240	-1.32635	1.42019	0.000515009	0.00450357
Cs6g09570	5.45721	-1.81392	0.000518005	0.00452397
Cs6g09690	-1.55045	0.131649	0.000518827	0.00452922
Cs5g06040	-5.3476	-1.86757	0.000521945	0.00454866
Cs1g16200	-2.94793	-1.26516	0.000524547	0.00456356
Cs5g35100	1.72712	0.831261	0.000527264	0.00458525
Cs1g17410	-1.06656	5.66648	0.000532913	0.00462846
Cs1g16560	-1.1125	3.92463	0.000533587	0.00463235
orange1.1t00746	4.0401	-1.49187	0.000544685	0.00471468
Cs5g14960	-1.67001	0.157789	0.0005478	0.00473964
orange1.1t04588	-1.43176	1.80561	0.000549748	0.00475046
Cs8g17810	1.99556	3.49107	0.000550419	0.00475425
orange1.1t05657	1.07412	2.0024	0.000551914	0.00476515
Cs2g04840	2.39926	-0.787703	0.000552497	0.00476817
Cs4g03220	-1.95647	1.69278	0.000566289	0.00488102
Cs8g21070	-1.47447	1.12444	0.000567484	0.00488514
Cs8g05250	-1.37358	0.976312	0.000576563	0.00495912
Cs8g07190	-2.89183	-1.30071	0.00058571	0.00502933
Cs4g09360	-1.30229	1.19625	0.000595458	0.00510232
Cs6g16990	1.5017	1.09444	0.000601205	0.00514725
Cs6g08230	-1.06993	1.80225	0.000602598	0.00515702
Cs1g23370	1.17092	1.19391	0.000603335	0.00516117
orange1.1t00643	1.39038	2.67065	0.000605937	0.00518126
Cs7g10940	-1.18718	3.64991	0.000607837	0.00519316
Cs2g17390	-1.04402	2.36993	0.000614173	0.00523635
Cs9g03000	-1.78789	0.968361	0.000622322	0.0052992
orange1.1t05488	3.69488	-1.16133	0.000635888	0.00540571
Cs2g29810	1.9484	-0.128598	0.000637198	0.0054146
Cs4g17820	-1.97627	-0.248132	0.000648234	0.00549923
Cs5g03530	-1.10535	1.85176	0.000649948	0.00551149
Cs4g10020	1.91873	-0.228189	0.000658358	0.00557125
Cs5g24910	3.49268	-1.2988	0.000660519	0.00558491
Cs2g21150	1.51445	4.45054	0.000679893	0.00573213
Cs5g03240	-1.41902	1.42572	0.000686302	0.00577976
Cs4g20010	-1.22016	1.22777	0.000688663	0.00579412
Cs3g02400	-2.14012	-0.535609	0.000692528	0.00581946
orange1.1t02265	-1.42369	0.983439	0.000703671	0.00590096
Cs2g31420	3.75787	-1.66685	0.000711032	0.00595293
Cs5g18330	-2.62374	-0.453397	0.00071156	0.00595491
Cs2g21130	-6.06975	-1.41344	0.00071547	0.00598273
Cs3g24170	-1.48841	0.376538	0.000719732	0.00601345
Cs9g09800	-1.26982	1.0345	0.00072105	0.00602201
Cs9g10920	-2.52569	-1.03776	0.000722738	0.00603229
Cs4g03870	-5.34815	-1.8675	0.000737332	0.00614043
Cs9g14520	5.26977	-1.92086	0.000739125	0.00615089
Cs3g10480	3.60436	1.84991	0.000739189	0.00615089
Cs1g09640	-1.19403	1.49502	0.0007397	0.00615263
Cs7g24650	-1.97633	-0.645615	0.000741924	0.00616611
orange1.1t01840	-2.53153	-0.84165	0.000745692	0.00619491
Cs7g25750	-6.50994	-1.09933	0.00075395	0.00625488
Cs8g12370	1.00247	4.418	0.000756155	0.00626655
Cs5g31210	-5.4388	-1.8151	0.000757137	0.00627215
Cs4g04740	3.28063	-1.06609	0.000765837	0.00634165
Cs3g15590	-1.02073	3.69947	0.000783471	0.00646672
Cs7g15900	1.92533	-0.491416	0.000784906	0.00647334
Cs3g23890	1.24751	1.50921	0.000787178	0.0064819
Cs2g02870	-2.56942	-0.815677	0.000788681	0.00649138
orange1.1t04643	1.18793	1.51977	0.000789939	0.00649911
Cs7g30620	-1.48655	1.15728	0.000796347	0.00654657
Cs4g06840	-1.48198	0.283614	0.000797177	0.00655076
Cs5g23785	-2.83419	-1.33724	0.000797651	0.00655202
orange1.1t05899	1.22751	1.23156	0.000813508	0.00667155
orange1.1t04193	2.74508	0.467852	0.000829878	0.00679217
Cs5g32110	1.21701	2.81347	0.000830706	0.00679623
Cs2g31150	-1.35999	3.30354	0.000832391	0.00680729
Cs2g29650	-5.34803	-1.86752	0.000834768	0.00681552
Cs6g01480	-5.3481	-1.86751	0.000834882	0.00681552
Cs7g09050	-1.71994	0.0770151	0.000842508	0.00686805
Cs1g06410	1.43507	0.627738	0.00084328	0.0068716
Cs9g06750	1.35533	1.56547	0.000847859	0.00690341
Cs2g16400	1.08641	1.57984	0.000852486	0.00693391
Cs7g27980	-1.22586	1.90727	0.000858356	0.00697252
Cs2g28790	-1.76792	0.0490218	0.000858392	0.00697252
Cs6g01270	-6.01271	-1.45282	0.000862783	0.00699984
Cs4g13170	-6.07006	-1.41341	0.000868043	0.00703693
Cs5g22730	-1.30055	0.900053	0.000873991	0.00707673
Cs2g08100	1.57914	0.579547	0.000875445	0.0070857
Cs4g13780	-5.2511	-1.92192	0.000877067	0.00709601
Cs6g21960	-1.32735	1.38163	0.000878981	0.00710869
Cs2g08540	-4.00608	-1.49343	0.000890661	0.00718893
Cs5g31010	3.83272	-1.62122	0.000891417	0.00719219
Cs2g26590	-1.9069	1.38588	0.000896078	0.00722695
orange1.1t04659	1.09389	1.84779	0.000899551	0.00724709
Cs2g14170	1.08554	3.44854	0.000902329	0.00726304
orange1.1t04425	1.95405	-0.0500889	0.000914574	0.00734714
Cs4g08150	-3.63145	-0.790322	0.000917273	0.00736524
orange1.1t00342	2.36356	-0.976976	0.000917548	0.00736524
Cs8g02440	1.35662	0.467082	0.000923726	0.00740611
Cs3g18580	-1.63846	0.342034	0.000924826	0.00741202
Cs3g14690	3.40624	-0.977091	0.0009294	0.00743993
Cs3g18610	-1.10294	1.4691	0.000932212	0.00745881
Cs3g02125	-3.28086	-1.41312	0.000934325	0.00746619
Cs2g26110	-1.26461	0.819457	0.000934507	0.00746619
Cs7g16290	1.28444	1.04572	0.000935227	0.00746903
Cs7g28060	1.62403	0.402047	0.000939218	0.00749505
Cs5g33380	-1.21903	1.04874	0.000950822	0.00756992
Cs5g26310	1.3402	0.957209	0.000954014	0.00759238
Cs2g06420	5.90648	-1.53371	0.000955681	0.00759973
Cs5g09110	-1.51967	0.353927	0.000964603	0.00765282
Cs6g13930	2.46976	-1.09728	0.000969341	0.00768017
orange1.1t05337	-3.28023	-1.4131	0.000977064	0.00773068
orange1.1t00573	-1.1731	1.39323	0.000983639	0.00777668
Cs1g22650	1.9442	-0.211129	0.000986914	0.00779936
Cs7g14270	1.77705	-0.245476	0.000990298	0.00782026
Cs2g02950	1.4295	0.357019	0.000992014	0.00783079
Cs5g32060	1.04357	2.97119	0.00100046	0.00788834
orange1.1t02242	1.71446	2.97438	0.00100325	0.00790724
orange1.1t02980	1.34631	1.35245	0.00100581	0.00791525
orange1.1t00072	-1.68176	1.27031	0.00101583	0.00797571
Cs7g31640	-1.50477	-0.00841375	0.0010168	0.00798025
Cs2g14650	2.22775	1.09541	0.0010197	0.0079999
orange1.1t02620	2.34997	0.161718	0.00102126	0.00800787
Cs3g25300	-2.77754	-1.09925	0.00102607	0.00803143
Cs8g17030	1.78989	2.94168	0.00103831	0.00810237
Cs3g01460	-1.16497	2.67002	0.00105678	0.00823457
Cs4g04790	-5.14678	-1.9785	0.00105713	0.00823457
orange1.1t04701	1.9454	-0.210798	0.00106303	0.00827317
orange1.1t03700	-1.82254	-0.535436	0.00106548	0.00828906
Cs6g09810	1.26081	2.97569	0.00107601	0.00836145
Cs5g31020	5.6998	-1.66696	0.00108516	0.00842617
Cs4g11670	-1.20247	1.67984	0.00109038	0.00845061
Cs6g12480	-1.05887	7.63823	0.00109642	0.00849425
Cs2g06470	1.77907	0.368391	0.00110816	0.00857543
Cs2g17750	2.2145	-0.762929	0.00111165	0.00859269
Cs7g04380	3.00039	-0.532959	0.0011153	0.0086144
Cs7g29570	-1.57839	2.9094	0.00111588	0.00861559
Cs3g26340	-3.6421	-1.71556	0.00112054	0.00864507
Cs4g11700	-3.52614	-0.868308	0.00112923	0.00870379
Cs4g11500	1.13076	1.71128	0.00113128	0.0087143
Cs2g10440	-1.36472	1.24042	0.00115304	0.00885135
Cs6g04620	-1.52501	0.526322	0.00116016	0.00889035
Cs5g28650	1.57376	0.274605	0.00116076	0.00889162
Cs4g04000	1.37927	2.18757	0.0011648	0.00891588
Cs9g09530	-1.68898	1.59908	0.00116569	0.00891934
Cs5g12720	1.23074	1.21294	0.0011961	0.00913152
Cs8g10390	1.26624	3.40126	0.0012099	0.00922998
Cs8g11512	5.16608	-1.97743	0.00122493	0.00933074
Cs3g16290	-2.64382	-0.765052	0.00122608	0.009336
Cs2g20210	-1.4527	5.32299	0.00123085	0.00936191
orange1.1t02586	-1.35109	0.661801	0.00123538	0.00938584
Cs8g20740	-5.14664	-1.97852	0.00124023	0.00941146
Cs8g07080	1.1444	1.53996	0.00124412	0.00943059
Cs7g14590	1.2109	2.07057	0.00125934	0.00953248
Cs7g08200	-5.4389	-1.81509	0.00126244	0.00955237
Cs1g24770	-5.4389	-1.81509	0.00126327	0.00955513
Cs6g21530	-1.9181	-0.473319	0.00127805	0.00964908
orange1.1t04852	3.49221	-1.29889	0.00128864	0.00971768
Cs6g20220	-2.3814	-1.13086	0.00129683	0.00976206
Cs8g20250	-2.62691	-1.19648	0.00133759	0.0100375
Cs2g11570	-1.51642	0.259215	0.00133784	0.0100375
Cs2g25720	2.64683	-0.787549	0.00134079	0.0100486
Cs2g13800	-1.27551	1.979	0.00134835	0.0100978
Cs1g23190	1.99188	-0.177467	0.00135104	0.0101142
Cs8g10340	6.19802	-1.33555	0.00135502	0.0101403
Cs8g18310	-2.46865	-0.716335	0.00136116	0.0101751
orange1.1t05190	-2.43318	-0.740286	0.00136658	0.0102045
Cs2g07460	-1.04408	5.92208	0.00137351	0.0102487
Cs1g22040	1.19701	1.23195	0.00137695	0.0102677
Cs2g04140	-1.18724	1.47411	0.00137706	0.0102677
Cs3g09000	1.11628	3.18562	0.00137793	0.0102705
Cs2g09520	-1.30994	1.85564	0.0013897	0.0103468
Cs6g13550	-1.38708	0.652511	0.00139143	0.0103559
Cs6g14150	1.75874	-0.112841	0.00139195	0.010356
Cs6g21270	-1.208	1.78549	0.00139244	0.010356
Cs3g23080	1.22354	2.42521	0.00140137	0.0104072
Cs8g15250	-3.15211	-1.49328	0.00142453	0.010571
Cs1g18450	-2.05891	-0.841449	0.00143389	0.0106217
Cs2g13360	-2.38157	-0.148091	0.00146709	0.0108323
Cs4g07310	-2.51707	-1.26501	0.00150041	0.0110584
Cs1g21370	-1.04526	2.24312	0.00150281	0.011072
orange1.1t01780	1.3232	1.56046	0.00150979	0.0111195
Cs9g03590	-2.94099	-0.3756	0.00151297	0.0111349
Cs5g06850	-3.34208	-1.37471	0.00151757	0.0111607
orange1.1t00909	-3.11174	1.3899	0.00154796	0.0113475
Cs7g29770	-1.4465	2.30261	0.00155027	0.0113603
Cs1g14210	-5.14654	-1.97853	0.00155569	0.0113959
Cs6g02540	-1.25755	0.976444	0.00155987	0.0114139
Cs4g17160	-5.14687	-1.97849	0.00155988	0.0114139
Cs6g03090	-2.17609	-0.764852	0.00156715	0.0114408
Cs8g04970	1.27156	0.519215	0.00156845	0.0114443
Cs5g34260	1.07727	2.62632	0.00157364	0.011474
Cs6g06210	1.18474	0.979951	0.00158054	0.0115202
Cs3g20720	1.16859	4.65422	0.00158405	0.0115334
Cs4g09890	1.23585	0.719866	0.00158663	0.0115399
orange1.1t05494	1.55989	0.40203	0.00159055	0.0115643
Cs3g16370	-1.14526	1.9418	0.00160279	0.0116367
Cs5g17970	3.91853	-1.00524	0.00160949	0.0116812
Cs6g06120	1.40244	0.379955	0.00164318	0.011888
orange1.1t02678	-2.51766	-1.26511	0.00165902	0.0119854
Cs6g08100	-1.11433	2.89695	0.00166525	0.0120262
orange1.1t02163	-1.11492	3.28911	0.00168508	0.0121651
Cs5g05670	-3.08219	-1.53509	0.00169355	0.0122176
Cs2g04700	-2.00412	-0.319614	0.00170804	0.0123134
Cs9g04120	4.10245	-1.45126	0.00175198	0.0125858
Cs9g10960	-2.1849	-1.06809	0.00175725	0.0126193
Cs8g18810	2.09472	0.379967	0.00177051	0.0126966
Cs3g13030	-1.91727	-0.473316	0.00177544	0.0127275
orange1.1t00520	1.5413	-0.0659192	0.00178503	0.0127812
Cs2g25850	1.10055	2.37765	0.00178543	0.0127812
Cs1g25250	-5.89026	-1.5351	0.00178728	0.01279
Cs8g16110	-1.46445	0.0207343	0.00179326	0.0128238
Cs5g26420	-5.0347	-2.03735	0.00185098	0.0131754
Cs8g07870	-5.03483	-2.03734	0.00185145	0.0131754
Cs4g06320	1.0234	1.73751	0.00187009	0.0133034
orange1.1t04298	1.16166	1.36288	0.00187402	0.0133267
orange1.1t05120	-1.03501	1.84376	0.00187583	0.0133349
orange1.1t04653	-1.46373	0.271538	0.00188556	0.0133995
Cs9g11040	-1.23542	1.54077	0.0019025	0.0134964
orange1.1t04169	-1.7566	-0.578546	0.00190773	0.0135288
Cs2g03180	1.7949	1.52482	0.0019114	0.0135502
Cs1g17770	-1.22573	0.794401	0.00192368	0.0136238
Cs6g14570	1.16989	3.46409	0.00193037	0.013657
Cs4g12260	1.0919	1.98003	0.00193048	0.013657
Cs8g05740	-1.30132	1.10427	0.00194085	0.0137209
Cs5g19950	-2.23236	-1.03769	0.00195741	0.0138284
Cs2g14725	5.54237	-1.76327	0.00198606	0.0140216
Cs2g07640	2.51745	-1.06631	0.00198614	0.0140216
orange1.1t01124	1.28026	2.51711	0.00199564	0.0140741
orange1.1t02165	-2.03533	-0.394487	0.00200462	0.0141277
Cs1g19190	-1.38514	1.71147	0.00201265	0.0141768
orange1.1t05260	-1.44218	0.546355	0.00201297	0.0141768
Cs2g03310	-5.68091	-1.66843	0.00201666	0.0141979
Cs2g14090	-1.78886	0.398562	0.00203287	0.0142825
Cs4g03140	-1.18723	3.43622	0.0020341	0.0142862
Cs2g02390	-1.25823	0.634039	0.00206397	0.0144861
Cs2g31260	1.33581	3.19365	0.00208771	0.0146125
Cs2g08000	1.51399	0.814506	0.00209588	0.0146626
Cs2g24600	1.5448	-0.00560703	0.00211904	0.0148115
Cs2g08310	1.58779	3.36515	0.00212187	0.0148224
Cs5g03680	-5.03477	-2.03734	0.00215392	0.0150143
Cs1g24820	-1.87803	-0.600556	0.00216093	0.0150507
Cs6g20470	-1.00268	6.07418	0.00217343	0.0151142
Cs3g12580	-1.28763	1.54094	0.00217874	0.015146
Cs1g17030	6.21867	0.213322	0.0021828	0.0151639
Cs3g25900	-1.34144	1.56082	0.00220704	0.0153271
Cs2g20640	-2.11441	-0.95035	0.00221374	0.015365
orange1.1t05187	-4.10369	0.386551	0.00223765	0.0155081
Cs9g17330	1.33406	0.559882	0.00224092	0.0155255
Cs8g09010	-1.57205	-0.28312	0.00224551	0.0155467
Cs2g07080	1.69145	-0.228187	0.00226589	0.0156666
Cs1g01860	1.6169	1.71557	0.0022835	0.0157564
Cs4g10830	-1.19711	0.884106	0.00229445	0.0158216
Cs3g04030	-2.49286	-0.868053	0.002317	0.015923
Cs7g31260	2.01532	0.134411	0.00239747	0.0164209
Cs5g11770	-5.03492	-2.03733	0.00240222	0.0164479
orange1.1t01731	-1.18349	1.0488	0.0024169	0.0165429
Cs6g09250	1.12005	1.18115	0.00245367	0.0167777
Cs8g02530	-3.64314	-1.71552	0.00248977	0.0169791
Cs5g28160	1.5132	-0.1448	0.00250149	0.0170363
Cs2g22800	2.76768	-1.1287	0.00250262	0.0170383
Cs5g02760	-1.00361	2.82256	0.00250604	0.0170559
Cs4g17900	-1.21625	1.18384	0.00254728	0.0172848
Cs3g04040	-1.84394	-0.62287	0.00255284	0.0173111
Cs3g12370	1.15443	1.68405	0.00255985	0.0173356
Cs9g18090	1.7031	-0.372748	0.00256838	0.0173818
Cs2g02010	-3.46622	-1.81505	0.00257372	0.0174122
Cs5g17260	-1.10296	1.56611	0.00261112	0.0176303
Cs9g03290	-1.44867	-0.163571	0.00261289	0.0176364
Cs2g13200	1.15057	4.19891	0.00262437	0.0176963
Cs3g19580	-1.29556	1.12433	0.00262624	0.0177031
Cs2g01560	-1.18106	1.1379	0.00265159	0.0178505
Cs5g19070	5.26892	-1.92092	0.002653	0.0178541
Cs5g30350	5.69818	-1.66711	0.00267332	0.0179731
Cs5g01660	-3.21769	-1.45262	0.00273275	0.0183424
Cs4g17810	-1.16594	1.31287	0.00277309	0.018601
Cs5g24700	-2.15985	-0.922361	0.00279853	0.0187532
Cs3g13670	1.20244	0.50886	0.00282252	0.018883
Cs7g13930	1.42637	0.656175	0.00283152	0.0189246
Cs3g23950	-1.42122	1.44734	0.00284888	0.019022
Cs3g18890	-1.56824	0.388066	0.00285546	0.0190597
Cs1g20330	5.54363	-1.76314	0.00286377	0.0191059
Cs5g25950	1.53887	3.73615	0.00286518	0.0191059
Cs6g16935	-3.79961	-1.62244	0.00289341	0.0192753
Cs4g15440	-2.05174	-0.716168	0.00290309	0.0193286
Cs1g13410	-1.25677	1.94158	0.00290331	0.0193286
Cs2g04720	-2.27569	-1.1963	0.00292825	0.0194629
Cs7g17630	1.32274	1.27503	0.00293392	0.0194816
orange1.1t02032	-1.15425	0.566616	0.00294275	0.019534
Cs4g14100	4.93265	-2.09777	0.00296044	0.0196322
Cs1g09960	2.41478	-0.491401	0.00297566	0.019714
Cs4g06630	-1.39299	0.875945	0.00298057	0.0197337
Cs1g20300	5.45874	-1.81375	0.00301271	0.0199336
Cs6g19340	-1.78676	1.51966	0.00303013	0.0200254
Cs8g14840	-2.11414	-0.950258	0.00306522	0.0202156
Cs5g08600	1.3045	0.879361	0.00312081	0.020538
Cs9g10310	1.02424	1.5397	0.00315392	0.0207071
orange1.1t04751	-1.59261	0.827164	0.00315975	0.0207387
Cs5g19240	-1.92558	-0.283512	0.00316724	0.0207745
Cs5g05870	1.46866	-0.112919	0.00317425	0.0208139
Cs5g33880	-2.01311	-0.740224	0.00318097	0.0208427
orange1.1t00594	1.64063	-0.335234	0.00321181	0.0210197
Cs5g23090	1.27781	5.40336	0.00327574	0.021356
Cs1g18680	-5.25165	-1.92187	0.0033005	0.0214695
Cs9g06230	-1.37363	0.742567	0.00330435	0.0214857
Cs7g05030	-4.7162	0.419432	0.00333393	0.0216388
Cs8g06090	1.7455	0.186848	0.00333849	0.0216546
Cs1g14530	-1.93747	-0.789907	0.00335135	0.0217312
Cs9g04820	-1.02461	3.84557	0.00342214	0.022134
Cs3g15890	-2.93394	-1.62246	0.00342881	0.0221701
Cs3g07780	-4.91344	-2.09868	0.00349135	0.0225531
orange1.1t01766	-1.62895	1.51559	0.00350251	0.0226038
Cs3g01390	-4.20809	-0.765096	0.00351079	0.0226501
Cs9g06210	1.81083	-0.666557	0.00353229	0.0227816
Cs9g01130	-1.19329	0.907808	0.00353851	0.0228145
Cs4g11180	1.26933	0.333657	0.00355035	0.0228649
Cs9g11190	-1.25297	1.27117	0.0035508	0.0228649
Cs1g16276	-1.57349	-0.433036	0.00359147	0.0230687
Cs2g10070	1.4608	1.72442	0.00366894	0.0234704
Cs5g17380	2.43017	-0.244475	0.0036836	0.0235421
Cs7g16990	-1.35824	0.00640417	0.00369753	0.0236164
Cs1g18710	-3.55743	-1.76442	0.00370629	0.0236502
Cs6g13210	1.27732	0.488061	0.00371161	0.0236693
Cs3g02370	-1.9411	-0.668654	0.00371831	0.0237046
orange1.1t03827	-1.21049	1.15779	0.00382662	0.0243344
Cs9g06150	-1.32786	2.59636	0.00386386	0.0245255
Cs2g09320	1.94816	-0.128769	0.00390075	0.0247213
Cs5g24105	1.44061	0.445797	0.00392848	0.0248585
Cs3g08500	-1.18533	0.953699	0.00397482	0.0251051
Cs1g04200	4.93217	-2.09782	0.00399172	0.025173
Cs2g10220	4.9334	-2.09769	0.00400833	0.0252621
Cs7g18050	-1.72128	-0.600404	0.00403475	0.0254051
Cs5g02210	1.25245	0.788956	0.00403831	0.0254119
Cs8g04550	-1.62442	0.945692	0.00407244	0.0256188
Cs9g02790	-2.49612	0.584874	0.00412245	0.0258697
Cs4g11520	1.50622	1.01649	0.00412638	0.0258771
Cs2g12630	-2.09128	-0.0842125	0.00412954	0.0258771
Cs2g24050	-1.61621	0.00594969	0.00412955	0.0258771
Cs6g12330	-1.32512	-0.0684285	0.0041574	0.0260251
Cs6g16620	-3.46608	-1.81507	0.00419601	0.0262267
Cs1g20620	1.86171	-0.533109	0.00425618	0.0265459
Cs2g24040	1.29941	1.5096	0.00425791	0.0265486
Cs2g31130	-1.14342	2.0482	0.00426062	0.0265574
Cs9g14190	-1.02603	0.900278	0.00427579	0.0266305
Cs6g19300	-1.21588	0.99846	0.00428022	0.0266471
Cs3g11110	-1.3797	0.387668	0.00429462	0.0267087
Cs3g26570	-1.70863	0.183751	0.00431412	0.0268173
Cs3g23860	-2.93363	-1.62251	0.0043455	0.026996
Cs2g28140	-1.76071	-0.394073	0.00435979	0.0270765
Cs4g18560	-1.19294	0.307753	0.00436681	0.0271119
Cs7g22980	-1.14392	1.68437	0.0044	0.0272848
Cs9g09570	-1.57211	-0.147445	0.00440541	0.0273018
orange1.1t00539	-2.8532	-1.66823	0.00441933	0.0273592
Cs8g09350	-2.8532	-1.66823	0.00442003	0.0273592
orange1.1t05415	-1.61154	0.0633271	0.00446227	0.0275706
Cs7g06650	-1.2404	1.38192	0.0044658	0.0275841
Cs3g04515	-1.06339	1.28325	0.00447244	0.0276167
Cs9g02920	-2.8704	1.75758	0.00450333	0.0277823
Cs1g14300	1.11597	2.40555	0.00453118	0.0279373
orange1.1t04627	-1.83548	-0.433227	0.00464228	0.0285534
Cs1g02330	1.5554	-0.316954	0.00464784	0.0285704
Cs8g05800	-2.77376	-1.37471	0.00468154	0.028743
Cs2g18060	-2.94914	-1.2651	0.0046943	0.0288127
Cs3g23100	-2.64449	-1.45266	0.00471645	0.0289139
Cs9g17930	-1.35015	1.06263	0.00472392	0.028951
Cs1g09140	-1.22761	1.99796	0.00473825	0.0290186
Cs3g02650	-1.36945	-0.213444	0.00477169	0.0291825
orange1.1t02444	-1.0306	1.3538	0.00477948	0.0292127
Cs1g12190	1.09739	1.39182	0.00480736	0.029348
Cs1g24170	-1.03311	1.30137	0.00483787	0.0294991
Cs2g02410	-1.28149	0.196902	0.00484392	0.029525
Cs4g01940	-4.91289	-2.09874	0.00484925	0.029542
orange1.1t04633	-1.38903	0.2225	0.00487462	0.0296612
Cs4g20300	-2.3351	-1.37451	0.00487712	0.0296676
Cs4g02940	-1.87639	-0.600364	0.00489045	0.029731
orange1.1t03054	-2.39758	-1.33704	0.00493417	0.0299485
Cs2g03890	-1.06184	2.02691	0.00495616	0.0300376
Cs5g02110	-2.27588	-1.19638	0.00495852	0.0300376
Cs6g10340	-1.23021	0.33118	0.00500323	0.0302547
orange1.1t01401	-1.00625	1.69382	0.00501258	0.0302933
Cs3g06650	-3.46567	-1.815	0.00511474	0.0308287
Cs2g28420	-1.8292	-0.7402	0.00512885	0.0309046
Cs3g02435	-4.78056	-2.16279	0.00514458	0.0309776
orange1.1t00188	-4.7805	-2.1628	0.00514551	0.0309776
Cs5g06430	-4.7805	-2.1628	0.00514921	0.0309816
Cs5g14480	-1.6308	0.431956	0.00515131	0.0309852
orange1.1t05075	2.36745	-1.16154	0.00515791	0.0310157
Cs2g08030	-2.0581	-0.841257	0.00518242	0.0311356
Cs1g11960	-2.11692	-0.337667	0.00519337	0.0311923
Cs9g12170	-1.15817	0.661922	0.00524651	0.0314376
Cs9g16110	1.85571	-0.353914	0.00526249	0.0315056
Cs6g17120	1.28063	0.173898	0.00528907	0.0316462
Cs7g27110	-1.82337	0.318604	0.00529229	0.0316562
orange1.1t05200	1.36179	0.134396	0.00529864	0.0316849
Cs3g21870	-1.0482	2.19608	0.00533002	0.0318373
Cs4g17600	1.42801	0.0799103	0.00534116	0.0318739
Cs8g13940	-4.91364	-2.09867	0.00537887	0.0320802
Cs5g03100	-1.35378	-0.163477	0.00545651	0.0324675
Cs2g03760	2.46244	-0.334554	0.00546293	0.0324962
Cs6g19330	-3.08299	-1.53511	0.00547786	0.0325661
Cs3g20630	-1.47655	-0.493442	0.00548208	0.0325817
Cs5g13790	2.45004	-0.920329	0.0055417	0.0328738
Cs2g28070	-1.63761	-0.473088	0.00554248	0.0328738
Cs4g01190	-2.39762	-1.33702	0.00556988	0.0330267
orange1.1t01487	1.44045	0.665575	0.00567161	0.0335424
Cs6g15900	-1.76453	1.04843	0.0056747	0.0335496
orange1.1t03645	-2.21989	-1.23032	0.00570284	0.0336589
Cs3g04410	1.29401	-0.00592655	0.00576553	0.0339897
Cs4g05880	2.19441	-0.643568	0.00582389	0.034314
Cs5g29260	2.54017	-1.5337	0.00588234	0.0345886
Cs2g08390	-1.0092	1.86399	0.00596263	0.0350405
Cs7g04880	2.01455	-0.081394	0.00598559	0.035125
Cs7g01820	1.82962	-0.554414	0.00599487	0.0351693
Cs6g13310	-4.78032	-2.16282	0.00600599	0.0352245
Cs3g26830	-1.37111	0.209742	0.00607465	0.0355456
Cs5g22690	-1.19546	0.624621	0.00609213	0.0356274
Cs7g04930	-1.26469	-0.0529932	0.00610292	0.0356804
Cs5g18510	-1.09628	1.53126	0.00616565	0.0360265
Cs5g03136	-3.36957	-1.86744	0.00617584	0.0360757
Cs2g13280	-1.33642	0.652379	0.00620312	0.0362144
Cs5g11390	-4.91378	-2.09866	0.0062223	0.0363056
Cs7g27630	2.6622	-1.1949	0.00623478	0.0363564
Cs2g16880	1.16884	1.29286	0.00623633	0.0363564
orange1.1t05560	-2.07026	-0.473445	0.0062954	0.0366694
Cs5g27170	-2.64418	-1.45248	0.00634238	0.0368695
Cs8g02760	-1.1852	1.43652	0.00641102	0.0372156
Cs1g26820	1.78643	-0.317043	0.00641753	0.0372428
Cs5g33920	-2.31569	-0.53538	0.00650778	0.0376917
Cs4g18290	-1.22538	0.794361	0.00650972	0.0376922
Cs3g19100	-3.36869	-1.86742	0.00651798	0.037708
Cs6g22380	-2.26916	-1.41295	0.00652369	0.0377243
Cs6g10500	-1.1881	0.453639	0.00659568	0.0380498
Cs9g14510	-1.72851	1.43054	0.00659945	0.0380609
Cs5g19260	-1.0717	1.13129	0.00660306	0.0380709
Cs5g19990	3.77366	-0.712498	0.00663091	0.0381884
Cs5g22790	-1.15497	0.566625	0.00664391	0.0382522
Cs7g22840	-2.4596	-1.30076	0.00664573	0.0382522
Cs4g06180	-1.01817	0.716691	0.00673059	0.0385906
Cs2g24070	-3.26464	-1.92185	0.00673094	0.0385906
orange1.1t00559	3.40492	-0.97716	0.00677773	0.0388153
orange1.1t03580	1.01054	1.66113	0.00678337	0.0388259
Cs6g07000	-1.01835	1.74255	0.00680531	0.0389188
orange1.1t01578	-2.2206	-1.23021	0.00683147	0.0390247
Cs3g03350	-2.52792	-1.0378	0.00683683	0.0390344
Cs5g18040	1.94162	0.323613	0.00683803	0.0390344
Cs7g32200	-1.92441	-1.06796	0.00683997	0.0390344
Cs6g13860	-2.02323	-1.008	0.00685122	0.0390611
orange1.1t00587	-1.82959	-0.265874	0.00698349	0.0396494
Cs6g22000	-2.01804	-0.867771	0.00700136	0.0397234
Cs5g12300	2.1226	-1.12898	0.00705812	0.0399953
orange1.1t03967	1.65599	-0.763038	0.00707447	0.0400547
Cs2g02820	-1.86621	-0.715789	0.0071066	0.0402032
Cs3g18660	-1.20422	1.71142	0.00715821	0.0404504
Cs9g09310	4.79871	-2.16205	0.00716192	0.0404602
orange1.1t01610	1.81381	-0.298818	0.00717694	0.0404779
Cs2g07280	4.80013	-2.16192	0.007186	0.0405067
Cs7g22760	1.26064	1.39198	0.00723245	0.0407236
Cs3g09020	1.43108	0.47808	0.00726894	0.0409065
Cs2g23570	-1.4982	-0.130946	0.00730662	0.0410734
Cs5g20180	1.58114	-0.450692	0.00731471	0.0411075
orange1.1t01850	1.82766	0.674994	0.00736364	0.0413484
Cs2g12170	1.17741	0.424046	0.00736729	0.0413575
Cs4g04310	2.01352	-1.03585	0.00754692	0.0422384
orange1.1t04913	-1.88639	-0.950311	0.00755412	0.0422671
Cs1g03940	-3.46647	-1.81502	0.00761192	0.0425434
Cs7g28190	1.19899	0.402028	0.0076139	0.0425434
Cs1g21620	-1.87635	-0.00848283	0.00761886	0.0425478
Cs8g05870	-1.67088	-0.453058	0.00765579	0.0427307
Cs3g19250	-2.33597	-1.37465	0.00765792	0.0427309
Cs6g01720	1.16767	0.345245	0.00766401	0.0427532
orange1.1t01599	-1.22405	0.876531	0.00775439	0.0431515
Cs3g20890	-1.10023	2.46836	0.00776222	0.0431833
Cs1g06340	-1.34135	0.145332	0.00778448	0.0432953
Cs6g01080	-1.10026	1.17084	0.0078138	0.0434174
Cs1g02270	1.44372	1.05339	0.00781492	0.0434174
Cs1g14810	-1.90372	0.144544	0.00782634	0.0434572
Cs1g26640	-1.24783	0.526439	0.00782909	0.0434607
Cs9g13750	5.27347	-1.92054	0.00803834	0.0445015
Cs4g10460	1.21957	0.262103	0.00804686	0.0445366
Cs5g01190	-2.50282	-1.53504	0.00821089	0.0452916
Cs2g04920	-1.79166	-1.00792	0.00821156	0.0452916
Cs5g03070	-1.13773	1.13105	0.0082143	0.0452916
Cs6g13270	-2.6767	-1.76439	0.00824696	0.0454472
Cs7g06630	1.62209	0.488025	0.00827303	0.045554
orange1.1t01050	-1.40706	-0.31915	0.00829012	0.0456235
orange1.1t04969	-1.05188	5.07221	0.00830789	0.0456968
Cs2g11930	-1.19906	0.271871	0.00833353	0.0458131
Cs6g05460	-4.91318	-2.09871	0.00835223	0.0459036
Cs3g23350	-4.91318	-2.09871	0.00835619	0.045913
Cs9g07530	1.33982	-0.194573	0.00839496	0.0460889
orange1.1t00339	-1.33488	-0.00817083	0.00845177	0.0462889
Cs5g12430	-4.78072	-2.16278	0.00850503	0.0465308
Cs1g24850	-2.32985	-1.16332	0.00851253	0.0465469
Cs7g19070	2.37313	-1.37324	0.00852269	0.0465775
orange1.1t03022	1.32197	0.367957	0.00864472	0.0471475
Cs2g16700	1.35386	-0.245689	0.00864932	0.0471475
Cs6g09525	-2.67857	-1.16342	0.00865005	0.0471475
Cs7g30140	5.05439	-2.03632	0.00866635	0.0472112
Cs2g28680	1.28879	0.134323	0.00867958	0.047258
Cs7g02120	-1.40322	0.035067	0.00875879	0.0476133
Cs3g25930	1.00285	0.934134	0.00879054	0.0477731
Cs6g15050	2.8037	-1.71439	0.00880412	0.0478088
orange1.1t00787	2.76667	-1.12888	0.00881765	0.0478569
[truncated: 9 more rows]

## Sheet: 190vs210 WT
Gene_ID	logFC	logCPM	PValue	FDR
Cs6g09960	5.0111	8.59362	3.5013e-71	7.27956e-67
Cs1g16390	5.77709	4.70426	1.49772e-69	1.55696e-65
Cs5g09370	4.48197	6.204	2.14536e-63	1.4868e-59
Cs3g13440	-4.59516	4.68318	3.77767e-61	1.96354e-57
Cs4g08360	-5.015	4.67531	2.71841e-60	1.13037e-56
Cs6g17190	-4.25324	5.73214	5.4425e-59	1.88592e-55
orange1.1t05522	-5.12182	7.50656	2.98773e-56	8.874e-53
Cs2g03080	-4.29391	4.69037	8.73381e-49	2.26981e-45
orange1.1t00580	3.72826	6.96877	3.75561e-48	8.67587e-45
Cs9g16640	7.33555	6.48491	1.90623e-47	3.96324e-44
Cs5g25590	-8.38048	6.93972	5.25275e-46	9.92818e-43
Cs2g09850	5.95367	4.1619	7.87053e-46	1.36363e-42
Cs5g10550	3.46176	7.14136	1.32072e-42	2.11224e-39
Cs6g02360	2.94958	6.25405	1.06469e-40	1.58114e-37
Cs5g19060	4.26647	7.71569	1.33468e-40	1.84996e-37
Cs8g12640	3.26025	7.95127	2.79404e-40	3.63068e-37
Cs5g16360	3.07744	5.03714	3.79951e-40	4.6468e-37
orange1.1t05560	-4.59088	4.13834	6.70626e-37	7.7461e-34
orange1.1t01663	-3.01099	4.78461	1.63179e-36	1.7856e-33
Cs8g02530	-5.45235	3.86778	2.06032e-36	2.1418e-33
Cs3g03045	-4.42192	4.90981	5.11879e-36	5.06785e-33
Cs5g05670	-5.1003	3.31858	1.13961e-35	1.07698e-32
Cs2g12490	-4.1099	3.63925	4.6201e-35	4.17637e-32
Cs2g13450	-3.39839	5.15776	1.47703e-34	1.27954e-31
orange1.1t02075	4.45123	3.17568	8.48112e-34	7.05323e-31
Cs8g09350	-4.19955	4.24395	9.27591e-34	7.41752e-31
Cs6g21400	3.06711	5.08841	1.10013e-33	8.47139e-31
Cs5g21690	3.29624	4.60323	6.98371e-33	5.18566e-30
Cs1g22140	4.76052	5.07311	1.87826e-32	1.34659e-29
orange1.1t04155	-4.09482	3.95549	3.98874e-32	2.76433e-29
orange1.1t03043	4.14035	4.24384	4.51805e-32	3.03015e-29
orange1.1t03382	3.51974	3.94379	5.88724e-32	3.82505e-29
Cs2g26650	-4.09955	3.45622	7.28042e-32	4.58688e-29
Cs9g17380	3.48467	4.87802	1.14215e-31	6.98425e-29
orange1.1t04613	2.51456	5.47503	1.99708e-31	1.18632e-28
Cs4g03330	2.82533	6.95862	2.19757e-31	1.26916e-28
Cs5g13010	2.8939	6.12189	3.28476e-31	1.84577e-28
Cs5g14370	3.08906	8.01065	3.41019e-31	1.86582e-28
Cs3g14550	2.83367	7.2075	3.57278e-31	1.90466e-28
Cs1g02760	2.76728	8.9761	4.31815e-31	2.24447e-28
Cs4g07790	2.59632	5.64138	4.4964e-31	2.28011e-28
Cs5g11630	2.92667	4.55917	4.68853e-31	2.32093e-28
Cs4g15770	-3.81509	4.26713	9.09053e-31	4.39538e-28
Cs2g08460	2.9581	6.97219	1.09624e-30	5.17997e-28
Cs8g14690	-3.15321	7.18947	2.9176e-30	1.348e-27
orange1.1t02243	5.1619	2.95518	3.40013e-30	1.53678e-27
Cs2g03110	-2.48034	9.82162	8.57491e-30	3.79321e-27
Cs7g31640	-4.23273	4.04781	1.9666e-29	8.51825e-27
Cs7g31975	-4.18593	3.98517	2.46105e-29	1.04424e-26
Cs1g16670	-2.76287	4.82435	3.72173e-29	1.54757e-26
Cs2g09840	5.43074	2.45726	1.08626e-28	4.4283e-26
Cs6g22390	-4.30467	3.48194	4.45282e-28	1.78036e-25
Cs2g05560	-2.79545	6.84613	2.19713e-27	8.61897e-25
Cs6g09530	-2.485	5.41245	3.93421e-27	1.51474e-24
Cs3g14590	-3.14063	4.70507	4.32644e-27	1.63547e-24
orange1.1t04497	-2.57767	7.21967	6.3113e-27	2.34318e-24
Cs9g15150	-6.13077	4.57497	8.40728e-27	3.06659e-24
Cs6g12430	-3.37867	6.7065	9.47451e-27	3.39628e-24
Cs7g09900	-2.74404	4.52472	1.24214e-26	4.37716e-24
[truncated: 2,442 more rows]

## Sheet: 210vs230 WT
Gene_ID	logFC	logCPM	PValue	FDR
[truncated: 1,931 more rows]

## Sheet: 230vs250 WT
Gene_ID	logFC	logCPM	PValue	FDR
[truncated: 3,095 more rows]

[truncated: 5 more sheets: 250vs280 WT, 190vs210 MT, 210vs230 MT, 230vs250 MT, 250vs280 MT]
