# Supplementary material for: Regulation of carotenoid and chlorophyll pools in hesperidia, anatomically unique fruits found only in Citrus
Source: Oxford University Press journal article supplement (doi:10.1093/plphys/kiab291), 2021-06-23
Supplement: kiab291_supplementary_data.zip [file kiab291_supplementary_data.zip › pp.00610.2021-s04.xlsx]

## Sheet: 190 Orange vs Brown
Supplemental Table S6 DEGs from comparison of flavedo sectors in chimeric MT fruit.
Gene_ID	logFC	logCPM	PValue	FDR
Cs5g10040	-2.60315	8.21271	2.36051e-34	4.87138e-30
Cs7g15150	5.55664	3.11745	1.14096e-30	1.1773e-26
orange1.1t02947	4.67017	3.33931	1.4822e-24	1.0196e-20
Cs9g01400	-2.13881	6.51778	1.04905e-22	5.41232e-19
Cs5g28655	-5.55633	1.56745	3.48952e-17	1.44026e-13
Cs9g17760	-1.69461	6.00065	3.03161e-16	1.04272e-12
Cs2g21595	4.45304	1.96696	5.17041e-16	1.52431e-12
orange1.1t06004	4.28602	1.92244	7.37016e-16	1.90122e-12
orange1.1t03296	8.80059	1.25006	1.76228e-15	4.0409e-12
Cs1g06390	-3.58413	2.29465	1.46725e-14	3.02797e-11
orange1.1t02800	-2.84201	3.73404	3.91668e-14	7.34805e-11
Cs7g13900	1.61943	5.37727	2.33266e-12	4.0116e-09
Cs2g21470	-2.37046	3.797	1.11706e-11	1.77329e-08
Cs3g23040	-1.77094	4.8533	1.48967e-11	2.19588e-08
Cs5g09880	-1.39458	8.914	2.80871e-11	3.86422e-08
Cs8g15460	7.6762	0.231848	1.35937e-10	1.75333e-07
orange1.1t06036	-2.49784	2.46435	2.06866e-10	2.51123e-07
Cs3g18090	3.90294	4.78311	2.48851e-10	2.85307e-07
Cs7g15130	1.42307	7.75656	4.09383e-10	4.44655e-07
orange1.1t00013	1.31451	5.79767	9.47932e-10	9.78124e-07
orange1.1t03455	2.5004	4.44904	4.70592e-09	4.62457e-06
Cs4g07040	3.198	2.85531	5.52335e-09	5.18115e-06
orange1.1t03541	2.36488	2.67505	5.92254e-09	5.31406e-06
Cs2g08310	1.8554	3.94251	6.21295e-09	5.34236e-06
Cs9g09640	1.94351	5.30395	7.28495e-09	6.01358e-06
Cs7g15190	4.91772	0.180676	8.0726e-09	6.04131e-06
Cs3g03970	4.51132	4.87664	8.1403e-09	6.04131e-06
Cs8g01970	-2.77823	1.91083	8.19677e-09	6.04131e-06
Cs5g29930	1.45133	5.62687	1.69462e-08	1.20592e-05
Cs2g14720	-1.45842	5.6083	2.23037e-08	1.5163e-05
Cs7g31790	2.27939	3.29477	2.27772e-08	1.5163e-05
Cs5g09980	-3.11787	2.62004	2.44894e-08	1.57934e-05
Cs3g23050	4.99076	1.54509	2.63317e-08	1.64669e-05
Cs5g11310	2.45028	4.61328	4.25411e-08	2.52637e-05
Cs2g04490	1.91634	4.90891	4.28469e-08	2.52637e-05
Cs7g14020	1.14132	8.97773	4.86326e-08	2.78787e-05
Cs3g24220	-1.47964	4.1364	6.64641e-08	3.70708e-05
Cs1g26340	1.4532	4.8186	8.03457e-08	4.36341e-05
Cs7g10200	1.33438	8.4282	9.54869e-08	5.0045e-05
Cs5g09930	-1.53539	3.52734	9.77675e-08	5.0045e-05
Cs7g13880	1.16594	5.67309	9.94256e-08	5.0045e-05
orange1.1t01675	-1.53623	6.69188	1.17097e-07	5.62634e-05
Cs5g20610	8.10005	3.14433	1.17232e-07	5.62634e-05
orange1.1t02662	1.40657	5.23655	1.33284e-07	6.25132e-05
Cs6g21420	1.67104	4.77915	1.67384e-07	7.67622e-05
Cs5g09860	-2.65569	2.47771	2.2397e-07	0.00010048
Cs7g14050	1.12155	5.5641	2.33782e-07	0.00010265
Cs4g05660	5.54797	2.60542	2.90322e-07	0.000123464
Cs7g09900	-2.57391	2.65992	2.93489e-07	0.000123464
Cs7g14000	1.12758	8.08152	2.99133e-07	0.000123464
Cs6g07420	1.1648	6.32227	3.12064e-07	0.000126276
Cs2g01840	-1.09903	6.74873	5.05e-07	0.000200417
Cs7g29760	2.46472	3.74711	5.57241e-07	0.000216977
Cs5g08640	1.40275	7.54945	5.94692e-07	0.000227271
Cs8g12370	1.83019	3.97526	6.47988e-07	0.000243137
orange1.1t04489	2.92631	6.23315	9.20111e-07	0.000331045
Cs5g30850	1.91696	8.52757	9.20866e-07	0.000331045
Cs4g10160	4.13001	3.61973	9.30397e-07	0.000331045
Cs1g23450	-1.70879	6.29107	1.00354e-06	0.000351019
Cs3g23020	-1.08939	4.85886	1.03706e-06	0.000356608
orange1.1t02755	2.09385	5.60765	1.05408e-06	0.000356608
Cs7g19830	3.10826	4.87532	1.19995e-06	0.000399409
Cs7g13940	1.08551	5.3507	1.23225e-06	0.000402794
Cs7g31800	-1.15654	6.10693	1.25806e-06	0.000402794
orange1.1t02041	1.70123	6.94121	1.26867e-06	0.000402794
Cs6g11950	2.59427	6.07826	1.3698e-06	0.000428311
orange1.1t03603	1.56305	7.07519	1.47972e-06	0.000455775
orange1.1t03602	1.45772	6.52427	1.80716e-06	0.000548446
Cs7g24940	2.8452	6.32142	1.87177e-06	0.000559822
Cs9g17770	-1.40192	3.89629	2.06002e-06	0.000598769
Cs8g09780	2.85043	6.25301	2.15127e-06	0.000616606
Cs5g28560	-1.82461	3.51924	2.30582e-06	0.000646194
Cs2g18250	1.73858	5.72695	2.3807e-06	0.000646194
Cs1g08440	1.1059	7.21312	2.38764e-06	0.000646194
Cs5g31180	-3.37103	2.20279	2.40022e-06	0.000646194
orange1.1t02389	1.77921	6.78945	2.41106e-06	0.000646194
Cs8g12640	1.17128	7.46906	2.6127e-06	0.00069126
Cs5g32740	3.86876	8.35893	2.66053e-06	0.000692485
Cs4g06040	-4.39693	-0.23234	2.7108e-06	0.000692485
Cs3g01530	1.19468	7.62874	2.71799e-06	0.000692485
Cs1g25510	-1.2565	5.3664	2.8534e-06	0.000718117
orange1.1t03729	4.24802	4.01753	3.39099e-06	0.000838145
Cs3g11790	1.25667	4.29332	3.41155e-06	0.000838145
Cs8g07400	-3.98013	2.23661	3.51693e-06	0.000851967
Cs2g22650	-1.22262	4.64967	3.55038e-06	0.000851967
Cs2g23820	1.98663	3.9627	3.66085e-06	0.00086838
Cs8g03230	-2.10391	2.81585	3.82251e-06	0.000896423
Cs2g30400	-1.88082	2.52146	4.44426e-06	0.00101777
Cs3g21660	1.99623	3.82298	4.47178e-06	0.00101777
Cs9g09800	-1.61798	3.24227	4.48792e-06	0.00101777
Cs1g03980	-1.37399	3.51044	5.04201e-06	0.001131
Cs9g02570	1.34331	4.31057	5.14589e-06	0.00114189
Cs5g22520	-3.17578	0.625342	5.36865e-06	0.00116848
Cs2g19970	2.38486	3.02109	5.37936e-06	0.00116848
Cs2g06650	1.26889	8.57016	5.4356e-06	0.00116848
Cs5g27560	1.48343	3.90874	5.68826e-06	0.00121019
Cs2g22010	3.25576	2.13899	5.75206e-06	0.00121128
Cs6g12480	1.20862	5.68881	5.85373e-06	0.0012126
Cs1g22540	1.9709	4.23398	5.87585e-06	0.0012126
Cs8g20130	4.97333	1.53114	6.12092e-06	0.00125067
orange1.1t03504	-2.20923	3.73433	6.22218e-06	0.00125889
Cs7g32220	1.77828	9.25443	6.37762e-06	0.00126795
Cs5g17380	8.34019	0.821645	6.3898e-06	0.00126795
Cs7g24250	-3.27208	0.574946	6.96738e-06	0.00136939
Cs5g02940	1.21001	5.53805	7.54704e-06	0.00144371
Cs5g08360	1.73132	3.4378	7.54993e-06	0.00144371
Cs4g06410	3.60726	0.691821	7.61145e-06	0.00144371
orange1.1t02204	2.27617	3.43461	7.62536e-06	0.00144371
orange1.1t01957	2.98285	5.37149	7.94886e-06	0.00149128
Cs3g01585	3.81782	6.19431	8.12624e-06	0.00151082
Cs2g26250	2.34647	1.73361	8.75034e-06	0.00158795
Cs7g11415	3.76727	0.825607	8.77193e-06	0.00158795
Cs3g10430	1.57813	5.34177	8.95544e-06	0.00160707
Cs5g19990	3.32882	3.67859	9.55404e-06	0.00169971
Cs5g16860	1.95526	7.17752	9.72004e-06	0.00171446
Cs7g14190	2.90343	0.725681	9.8227e-06	0.00171789
Cs3g07770	1.81528	5.09743	1.05606e-05	0.00183142
Cs2g10140	4.06833	1.23592	1.07623e-05	0.00185085
Cs5g03420	1.04739	5.02067	1.12501e-05	0.00190754
orange1.1t00416	3.7753	2.28965	1.12768e-05	0.00190754
Cs4g05190	3.03607	5.26962	1.2794e-05	0.00214658
Cs1g15170	-1.62714	3.52767	1.33667e-05	0.00222458
Cs5g23840	-1.7926	3.05903	1.39247e-05	0.00229891
Cs6g11430	1.42059	4.74503	1.52181e-05	0.00249252
Cs2g06640	1.80986	4.21212	1.57496e-05	0.00255924
Cs9g05680	-1.29474	3.95859	1.60517e-05	0.00258796
Cs7g17300	1.28628	3.83976	1.62315e-05	0.00259666
Cs7g09440	1.41083	3.60405	1.65877e-05	0.00263324
Cs2g03080	-2.26453	2.77702	1.67256e-05	0.00263486
Cs6g07400	2.30577	5.37118	1.69236e-05	0.00264083
Cs8g04280	1.09027	6.08432	1.70194e-05	0.00264083
Cs4g18120	2.24646	8.44216	1.78361e-05	0.00274689
Cs2g30390	1.03817	8.57775	1.89068e-05	0.00286896
orange1.1t02265	-1.72797	2.99004	2.03858e-05	0.00307081
Cs4g07650	-1.8418	3.63401	2.0827e-05	0.00311454
Cs3g14590	-1.12779	5.33213	2.18769e-05	0.00324801
Cs9g06660	-1.62622	2.93685	2.23347e-05	0.00326895
orange1.1t00386	1.08791	7.08279	2.30085e-05	0.00334384
Cs7g18780	-1.38373	5.32504	2.35593e-05	0.00339995
Cs3g27170	1.30161	4.22226	2.38196e-05	0.00341365
orange1.1t03183	-1.47824	2.82823	2.44092e-05	0.00345023
Cs8g10860	-1.06603	6.34807	2.48053e-05	0.00348236
Cs8g05940	-1.67525	3.51281	2.51885e-05	0.00349716
Cs5g16830	1.83737	3.40707	2.52497e-05	0.00349716
Cs2g10620	-1.28456	6.00032	2.67528e-05	0.00368065
orange1.1t02319	1.80183	4.97548	2.70784e-05	0.0036902
orange1.1t02678	6.1414	-0.981258	2.71799e-05	0.0036902
Cs6g08175	1.70208	2.67308	2.7584e-05	0.0037206
Cs8g05060	1.2668	9.40901	2.87335e-05	0.00385048
Cs9g14480	1.65764	5.97204	2.90944e-05	0.00385886
Cs1g25830	-1.14888	6.70813	2.91701e-05	0.00385886
Cs3g19760	1.38607	6.49839	3.13274e-05	0.00409179
Cs9g18660	1.68099	7.07976	3.16058e-05	0.00409917
Cs3g01120	-1.16637	5.1788	3.18969e-05	0.00409917
Cs7g27290	-2.88569	2.64339	3.19797e-05	0.00409917
Cs7g06080	3.24873	7.40937	3.25472e-05	0.0041386
Cs5g31680	-1.27972	3.33195	3.26885e-05	0.0041386
Cs8g08760	-1.30005	3.97624	3.46997e-05	0.00436645
Cs6g15880	1.89844	5.44004	4.02591e-05	0.00498909
orange1.1t00072	-2.08735	1.54174	4.02903e-05	0.00498909
Cs2g07100	1.4037	4.43955	4.0373e-05	0.00498909
Cs4g06030	-1.86807	2.70244	4.2215e-05	0.00515497
Cs7g11810	-1.26354	4.8617	4.31408e-05	0.00523704
Cs6g08500	3.27127	5.12909	4.43315e-05	0.00535011
Cs7g32120	6.528	-0.704076	4.51886e-05	0.00542184
Cs2g02790	1.11836	6.92254	4.55277e-05	0.00543096
Cs7g15160	2.91749	0.279385	4.60593e-05	0.0054628
Cs7g13960	1.40207	3.00783	4.80205e-05	0.00564654
Cs7g31010	1.63602	5.72209	4.82829e-05	0.00564654
Cs2g20590	2.42363	9.44238	4.84294e-05	0.00564654
Cs2g06470	3.09486	4.89489	4.88408e-05	0.00566252
Cs8g13660	-1.06867	5.61632	5.03606e-05	0.00578764
Cs9g16720	-4.5321	0.640524	5.04809e-05	0.00578764
Cs3g18030	1.78803	9.79062	5.21754e-05	0.00591617
Cs4g09550	-1.1621	8.84301	5.36516e-05	0.00605032
Cs3g06440	1.5143	6.88613	5.49797e-05	0.00613306
Cs4g02670	1.45045	3.87233	5.58317e-05	0.00619461
orange1.1t04859	2.6637	1.15545	5.72624e-05	0.00628787
Cs6g13640	2.07649	3.23283	5.72815e-05	0.00628787
Cs9g04820	2.66934	2.73138	5.88272e-05	0.00642337
Cs4g18090	2.65484	7.14318	5.92911e-05	0.00643994
Cs5g30790	1.09838	6.38124	6.05665e-05	0.00654403
Cs7g02380	1.70132	3.16678	6.2382e-05	0.00667382
Cs1g08020	-1.13541	3.90575	6.27103e-05	0.00667382
Cs5g32300	2.9667	1.93097	6.27378e-05	0.00667382
Cs3g04020	-2.40986	0.536176	6.42736e-05	0.00680213
Cs4g03700	1.07735	8.22211	7.06489e-05	0.00743868
Cs7g13790	1.13119	5.72148	7.23155e-05	0.00757551
Cs4g15735	1.55946	4.59784	7.31383e-05	0.007623
orange1.1t01192	3.28621	4.14208	7.60203e-05	0.00788357
Cs5g29860	1.54553	7.7357	7.75787e-05	0.00800495
Cs4g14230	1.55756	4.53678	7.81204e-05	0.00802075
Cs3g07440	1.68691	2.96173	8.01901e-05	0.00819249
Cs3g03045	-1.39044	4.79476	8.06986e-05	0.00820383
Cs2g21460	1.34086	8.76515	8.11162e-05	0.00820585
Cs4g10560	3.90398	-0.614985	8.22042e-05	0.00823808
Cs2g05530	-1.14731	4.81166	8.22331e-05	0.00823808
Cs9g10480	2.38489	3.82223	8.52724e-05	0.00850129
Cs1g18220	1.54501	7.37808	8.59397e-05	0.00851089
Cs3g23440	1.88564	6.07925	8.6403e-05	0.00851089
Cs6g18680	-1.36366	5.1364	8.69689e-05	0.00851089
Cs5g32110	3.29947	2.12637	8.70183e-05	0.00851089
Cs4g14890	1.37868	4.46424	8.84075e-05	0.00860597
Cs3g19890	1.2822	8.4038	9.47392e-05	0.00917903
orange1.1t00942	1.93486	2.006	9.57972e-05	0.00923816
Cs7g29750	5.15033	-0.29582	9.9567e-05	0.00955704
Cs9g17380	1.67532	5.60266	0.000100322	0.00958491
Cs5g21190	1.82446	3.16695	0.000101228	0.00962696
Cs6g19205	1.27832	4.96356	0.000105081	0.00988546
Cs7g14030	1.24147	4.01055	0.000105384	0.00988546
Cs4g12710	1.77617	3.14791	0.000106267	0.00992322
orange1.1t01260	2.12684	4.49548	0.000110828	0.0102563
Cs4g06970	1.00377	7.63417	0.000111822	0.0103021
Cs1g23230	-1.29983	3.65069	0.000118617	0.0108796
Cs1g24170	-1.3904	3.40144	0.000121876	0.011129
Cs5g29830	1.91442	4.74558	0.000123313	0.0112106
Cs1g22200	1.34767	7.20657	0.000125769	0.011353
Cs2g04110	6.44218	-0.768157	0.000126153	0.011353
Cs6g12430	-1.50858	4.9327	0.000127058	0.011353
Cs2g23750	1.12684	7.1008	0.000127079	0.011353
Cs3g18540	1.54395	5.31751	0.000128135	0.0113979
orange1.1t03024	3.00321	5.04322	0.000132018	0.0116512
orange1.1t02820	2.71915	3.97155	0.00013274	0.0116512
orange1.1t03757	-5.89388	-1.14368	0.00013317	0.0116512
orange1.1t03798	-2.14361	0.938812	0.000133241	0.0116512
Cs7g15480	-1.05532	6.54675	0.000134258	0.0116742
Cs9g02930	4.57567	4.71565	0.000134861	0.0116742
Cs3g03620	3.84574	2.95762	0.000135927	0.0116742
Cs3g18330	1.77403	4.09931	0.000136589	0.0116742
Cs1g06850	-1.10781	4.01258	0.000136731	0.0116742
Cs7g06330	1.93173	6.28927	0.000136897	0.0116742
Cs7g15170	2.61714	0.990685	0.000139701	0.0117855
Cs9g14500	2.37566	1.40327	0.000139916	0.0117855
Cs8g14690	-1.15977	5.56064	0.000146819	0.0122668
Cs8g07630	-8.8588	1.31	0.000149777	0.0124635
Cs1g09140	-1.64853	3.14303	0.000151693	0.0125723
Cs7g13980	1.14346	6.40313	0.000153332	0.0126573
Cs3g14420	1.01607	7.04597	0.000154845	0.0127313
Cs2g19380	-1.36768	4.5204	0.000156995	0.0128568
Cs3g20970	3.439	3.90635	0.000158289	0.0128718
Cs7g14060	1.08947	3.52344	0.000159225	0.0128718
Cs5g18620	-1.98769	1.80515	0.000159673	0.0128718
orange1.1t03726	2.39708	2.06103	0.000161446	0.012964
orange1.1t02321	-1.01829	6.30316	0.000167327	0.0133325
Cs2g06990	2.64389	2.11202	0.000169415	0.013447
Cs3g09720	1.39334	4.67197	0.000170917	0.0135021
Cs5g10190	-1.19065	4.049	0.000171681	0.0135021
Cs3g27320	1.15461	4.83665	0.000172072	0.0135021
Cs2g29430	-1.24819	4.12959	0.000175253	0.0136996
Cs4g06950	2.6855	2.26908	0.000176147	0.0137175
Cs8g20020	1.27305	5.58539	0.000177874	0.0137999
Cs3g11760	1.25197	5.22864	0.000178917	0.0138289
Cs7g07600	-7.03803	-0.300339	0.00018428	0.0141903
Cs3g18780	6.28931	0.671633	0.000188538	0.0144341
Cs2g16900	1.48977	6.14925	0.000188846	0.0144341
Cs5g17920	1.61814	6.31292	0.000189975	0.0144669
Cs7g22730	2.30577	7.70469	0.000200059	0.0151788
Cs5g11630	1.44436	5.75025	0.000206429	0.0156047
Cs8g09390	2.92541	3.80638	0.00020749	0.0156277
Cs7g25580	2.38251	4.43826	0.000209202	0.0156993
Cs2g10790	1.32008	4.71267	0.000214856	0.0160651
Cs7g22250	1.16044	7.06861	0.000224802	0.0166879
Cs7g26690	-2.11997	2.08794	0.000235034	0.0173015
Cs9g14150	1.02413	4.69123	0.000235583	0.0173015
Cs5g34300	-2.01373	1.55566	0.000238272	0.017437
orange1.1t03149	3.66766	1.64153	0.000240237	0.0175186
Cs1g24440	2.16207	8.38325	0.00024285	0.0176468
Cs7g19720	-1.38157	2.7065	0.000246959	0.0178824
Cs2g29990	6.6507	-0.612276	0.00025414	0.0183381
Cs3g19630	4.49151	0.863766	0.000255273	0.0183556
Cs2g29780	2.80131	1.44824	0.0002573	0.0184372
Cs3g18410	1.08624	4.87941	0.000264899	0.018916
Cs1g18460	1.23115	6.67426	0.000271434	0.0192932
Cs2g24600	2.91759	-0.396592	0.000272051	0.0192932
Cs4g14510	2.36193	1.74695	0.000280804	0.0198322
Cs7g01400	1.12912	5.55189	0.000283328	0.0198322
Cs8g19010	-1.19082	3.9588	0.000283386	0.0198322
Cs1g18240	5.84055	-1.18438	0.000285106	0.0198322
Cs4g09140	2.11217	7.48767	0.000286111	0.0198322
Cs1g21010	4.56918	-0.736051	0.000286582	0.0198322
Cs6g05660	6.08983	-1.01874	0.000289841	0.0198463
Cs6g05990	1.85746	4.25521	0.000290042	0.0198463
orange1.1t00313	3.32849	0.460791	0.000293361	0.0199805
Cs1g04870	1.97241	8.07108	0.000306949	0.0207339
Cs4g18370	1.84142	1.88761	0.000307436	0.0207339
orange1.1t01623	-2.91586	-0.187059	0.000309309	0.0207922
Cs2g24670	1.76716	7.85402	0.000312471	0.0208914
Cs7g31430	2.31221	5.17945	0.000316046	0.0209828
orange1.1t05429	2.24494	0.630167	0.000316211	0.0209828
Cs3g23080	1.25244	3.37965	0.000317905	0.0210007
Cs4g06290	1.54303	5.13296	0.000326726	0.0214734
Cs5g28400	1.5212	3.66012	0.000331061	0.0216371
Cs2g30870	-1.29527	2.71856	0.000334514	0.0217772
Cs7g29570	1.54452	4.58522	0.000337116	0.021809
Cs6g08070	3.06664	-0.528336	0.000338668	0.0218409
Cs2g20200	1.21379	4.31569	0.000345203	0.022193
Cs5g21220	3.01992	0.819417	0.000349156	0.0223775
orange1.1t03987	7.19123	-0.181876	0.000350712	0.0224076
Cs4g19480	-1.27523	3.55736	0.000353608	0.0225229
Cs3g12510	-1.25462	3.9822	0.000359419	0.0228226
Cs3g18760	1.2907	4.11169	0.000365494	0.0229961
Cs1g12300	3.75593	2.99118	0.000368979	0.0231448
Cs2g22660	4.22625	1.96416	0.000375962	0.0233332
Cs9g17340	1.34467	7.33348	0.000376734	0.0233332
orange1.1t01124	2.80584	1.70702	0.000377294	0.0233332
Cs5g10550	1.75282	7.09464	0.000377955	0.0233332
orange1.1t05115	-2.23937	0.323405	0.000378151	0.0233332
Cs2g08765	-1.57753	2.47033	0.000380359	0.0233332
Cs8g20490	-1.81924	1.37502	0.000381029	0.0233332
Cs5g28650	-1.51718	1.97674	0.00038847	0.0236903
Cs6g10120	1.81448	6.39537	0.000389156	0.0236903
orange1.1t05258	4.85652	0.916817	0.000391711	0.0237582
orange1.1t03155	1.15076	3.34634	0.000394632	0.0238129
Cs4g03940	1.1469	3.32512	0.000397513	0.0239169
orange1.1t02759	1.80718	2.21742	0.000401288	0.024004
Cs8g16770	1.19201	5.94061	0.00040819	0.0243463
Cs6g16650	1.34797	6.35517	0.000409823	0.0243733
orange1.1t03632	1.69099	4.66671	0.000424388	0.0250342
Cs7g07300	1.47967	7.91855	0.00042739	0.0251283
Cs3g24260	2.51952	4.79879	0.000437887	0.0256724
Cs7g27350	2.50606	0.511418	0.000445611	0.0259044
orange1.1t00964	7.10317	-0.251291	0.000447014	0.025913
Cs5g17870	1.88391	2.09941	0.000448893	0.025949
orange1.1t00578	3.9958	1.93351	0.000455886	0.0262065
orange1.1t02796	2.92353	5.71786	0.000457492	0.0262257
Cs1g08610	3.85025	0.0591293	0.000462396	0.0264334
Cs3g20250	-1.7761	3.10558	0.000468948	0.0267339
Cs5g21910	3.82569	-0.673593	0.000478704	0.0272149
Cs8g03700	1.8939	3.09812	0.000492384	0.0278844
Cs7g09640	1.45737	7.29991	0.000493183	0.0278844
Cs7g20870	1.03887	5.62719	0.000494609	0.0278886
Cs4g09080	1.11199	4.50566	0.000504555	0.0282143
Cs2g12510	-1.27222	2.90161	0.000505854	0.0282143
Cs9g17780	1.95771	0.990388	0.000508458	0.0282832
Cs7g29540	1.27081	3.1105	0.000519074	0.0287961
Cs3g10250	1.30983	7.27995	0.000525889	0.0290959
Cs7g02820	1.44976	6.32244	0.000529954	0.0292424
Cs3g09510	-1.0731	3.6034	0.00053963	0.0296969
orange1.1t00831	-2.18753	1.02436	0.000545101	0.0298389
Cs2g17970	1.29602	3.47065	0.000546981	0.0298626
orange1.1t01769	1.34082	6.25077	0.00055372	0.0301151
Cs8g17160	1.30175	5.28007	0.000562395	0.03034
Cs4g19640	-1.84582	1.29053	0.000563078	0.03034
Cs1g17220	1.41512	5.75345	0.000563406	0.03034
Cs5g33320	1.39506	2.30267	0.000565269	0.03034
Cs7g14390	2.29909	0.356166	0.000566018	0.03034
Cs5g18640	-7.33321	-0.0593721	0.000569811	0.0304642
Cs9g10100	-1.99068	1.07235	0.00057238	0.0305225
Cs5g29210	2.83783	1.58363	0.000578479	0.0307682
Cs6g20470	2.00131	5.53671	0.000584851	0.0310272
Cs3g12130	1.07682	5.06033	0.000613602	0.032469
Cs6g15150	1.91752	3.75422	0.000617151	0.0325733
Cs1g12430	1.71238	3.97571	0.000633194	0.0332499
Cs7g24240	-2.96936	-0.349445	0.000643999	0.0335611
Cs5g13010	1.54909	5.5068	0.000648335	0.033702
Cs5g22790	1.3016	2.85762	0.000679274	0.0352141
Cs4g20420	1.11935	8.51353	0.000686077	0.0352141
Cs8g06630	-1.69645	2.88938	0.000686087	0.0352141
Cs3g10090	2.08316	2.02299	0.000686453	0.0352141
Cs5g17900	1.73308	4.43102	0.000687363	0.0352141
Cs5g18740	2.67224	0.443675	0.000689369	0.0352141
Cs3g26730	-3.00377	-0.325195	0.000694978	0.035413
Cs4g07400	3.59476	-0.446195	0.000701377	0.035651
Cs3g26210	1.17031	5.14486	0.000705432	0.035769
Cs2g23870	1.23917	3.27399	0.000708434	0.0358332
Cs3g03670	-1.61144	2.35181	0.000712675	0.0358844
Cs4g04210	2.27011	5.92381	0.00071583	0.0358844
Cs5g21200	4.09445	1.10813	0.000716316	0.0358844
Cs7g10110	1.73724	5.02724	0.000719423	0.0358844
Cs8g03430	3.45363	0.705891	0.00071988	0.0358844
Cs6g01310	1.01084	9.30718	0.000730378	0.03632
Cs3g26760	-1.48791	2.53815	0.00073599	0.0365111
orange1.1t03628	2.22833	1.98024	0.000758198	0.0374329
Cs4g12760	1.97145	2.67389	0.000767068	0.0377804
Cs2g09545	1.27405	5.21721	0.000771014	0.0378518
Cs4g05490	1.39045	8.06633	0.000772187	0.0378518
Cs6g08260	-1.80608	3.43858	0.000777386	0.0380164
Cs1g14920	2.66585	2.66357	0.000780376	0.0380724
orange1.1t03682	1.04895	6.48418	0.000785041	0.0382097
orange1.1t00272	-1.44668	2.12037	0.000789622	0.0383422
Cs2g05170	1.94032	2.70642	0.000794946	0.0385101
Cs3g08480	-1.50309	2.92749	0.00079952	0.038641
Cs8g17960	1.12742	3.11532	0.00081357	0.0391367
Cs1g17840	1.07856	4.10294	0.000829092	0.039515
Cs3g01946	5.96542	-1.10041	0.000840907	0.0398938
Cs6g08600	1.18036	9.11238	0.000845115	0.0400014
Cs6g15450	1.88439	2.9105	0.000861485	0.0405592
Cs3g06370	-3.3204	0.307627	0.000862795	0.0405592
Cs6g15290	1.37764	7.20684	0.000882644	0.041398
Cs5g23250	1.12318	3.5817	0.000891779	0.0416881
Cs8g14710	1.02136	4.11294	0.000892869	0.0416881
Cs4g04530	2.19604	2.18517	0.000895533	0.0417181
Cs7g20340	-1.68288	1.40388	0.000902119	0.0419303
Cs2g07460	1.78777	5.20919	0.000934954	0.043063
orange1.1t02040	1.92939	4.87248	0.000939373	0.0430797
Cs9g17790	3.42648	-0.944327	0.000958324	0.0437543
Cs7g26640	2.61613	2.66387	0.000968172	0.0441063
Cs3g13200	1.03645	4.20743	0.000971858	0.0441767
Cs2g17260	-1.04441	4.64481	0.000974863	0.0442159
Cs3g23110	2.08259	9.55117	0.000982947	0.0444848
Cs4g11440	1.93686	2.42298	0.000994166	0.0447961
Cs6g19180	2.21288	3.25356	0.00101299	0.0453472
Cs7g13230	3.10689	3.934	0.00101713	0.0454338
Cs5g11620	1.52669	5.2769	0.00104659	0.0464482
Cs1g08280	1.25088	5.75974	0.00105395	0.0466744
Cs8g14950	1.25839	5.98678	0.0010601	0.0468465
Cs1g03290	-1.7141	2.40956	0.00107111	0.0472318
Cs9g03040	1.55753	1.93799	0.00107367	0.0472437
Cs1g20610	1.76677	5.6902	0.00108112	0.0474704
Cs9g13630	1.57147	4.89714	0.00109676	0.0480547
Cs2g28830	1.05448	5.21866	0.00110737	0.0484168
Cs6g15610	-1.11195	4.55903	0.00111323	0.0484678
Cs7g31270	1.03473	7.15205	0.00112428	0.0487123
Cs1g05120	5.36332	-1.47457	0.00113037	0.0488023
Cs2g07110	1.10375	5.12529	0.00113872	0.0489578
Cs4g14150	-1.55835	1.51546	0.00114902	0.0492979
orange1.1t04705	-2.82333	-0.449879	0.00116535	0.0496454
Cs3g17760	-1.98967	0.927236	0.00116659	0.0496454
orange1.1t02980	2.5525	1.90076	0.00116674	0.0496454

## Sheet: 210 Orange vs Brown
Gene_ID	logFC	logCPM	PValue	FDR
Cs5g10040	-2.53249	8.2423	1.8639e-48	3.75483e-44
Cs9g01400	-1.78986	5.94962	1.47313e-31	1.48381e-27
Cs2g21470	-3.68158	4.08247	6.6445e-30	4.46178e-26
Cs9g17760	-1.55199	5.90953	9.84932e-26	4.96037e-22
Cs7g13940	1.73899	4.5462	1.73882e-19	7.0057e-16
Cs5g09880	-1.4948	9.10197	1.3489e-16	4.52892e-13
Cs5g11730	1.10159	6.71375	1.45579e-15	4.18954e-12
Cs3g23040	-1.72389	4.13571	2.67495e-13	6.73587e-10
Cs7g15150	3.28435	3.43605	6.54254e-13	1.46444e-09
Cs7g15170	3.93153	1.22748	1.07806e-12	2.17176e-09
Cs5g28655	-2.94956	1.89066	3.57382e-12	5.78007e-09
Cs9g17770	-1.54478	4.10311	3.82867e-12	5.78007e-09
orange1.1t02947	3.29456	5.3577	4.01693e-12	5.78007e-09
Cs1g24440	1.21984	9.51249	1.32035e-11	1.77323e-08
orange1.1t06032	2.4465	2.23562	1.75078e-11	2.20434e-08
Cs7g17300	1.43579	3.9403	3.07533e-11	3.64426e-08
Cs5g09860	-2.76432	1.69002	5.385e-11	6.02671e-08
Cs7g13900	1.34011	4.9861	6.38895e-11	6.51955e-08
Cs4g09140	1.18134	7.11052	6.47262e-11	6.51955e-08
Cs5g09890	-1.07898	5.45549	7.47992e-11	6.84923e-08
Cs8g20130	4.93495	2.00186	4.59262e-10	3.85493e-07
Cs1g06390	-2.99641	2.01689	1.4105e-09	1.09287e-06
Cs7g24250	-7.18053	-0.219668	3.81047e-09	2.84303e-06
orange1.1t01260	1.26379	4.10089	8.5879e-09	5.63761e-06
Cs2g23820	1.56046	4.62476	8.67539e-09	5.63761e-06
orange1.1t03773	1.36065	4.36425	1.09864e-08	6.32347e-06
orange1.1t06004	4.02146	2.09338	1.47217e-08	8.01539e-06
Cs9g17780	6.8866	-0.456883	1.75303e-08	9.29337e-06
orange1.1t05128	-5.92399	0.321433	2.63484e-08	1.361e-05
Cs2g06470	2.1998	1.87491	3.2626e-08	1.64313e-05
Cs7g22990	-2.14637	2.3137	3.85537e-08	1.8943e-05
orange1.1t02828	-4.49046	-0.198181	6.68382e-08	3.06013e-05
Cs7g14370	2.55502	1.16224	7.18017e-08	3.21432e-05
Cs5g17870	2.23502	1.61818	2.42797e-07	0.000101899
Cs2g01990	5.48225	0.641839	2.90845e-07	0.000119573
Cs2g26250	2.9199	0.895379	4.85586e-07	0.000195643
orange1.1t00942	1.75849	2.01637	5.08499e-07	0.000200857
Cs6g08500	2.95415	5.22562	6.87401e-07	0.000261277
Cs8g07690	2.97062	0.422063	7.39068e-07	0.000275714
Cs2g21595	2.4741	2.06642	7.83096e-07	0.000286827
Cs3g05115	-1.47484	4.2476	1.02737e-06	0.000356622
Cs7g06080	2.11235	6.817	1.06216e-06	0.000356622
Cs7g09540	-5.76599	1.36598	1.29999e-06	0.000424387
Cs5g22520	-3.78675	-0.0163319	1.3272e-06	0.000424387
Cs5g32740	1.28873	8.27243	1.43435e-06	0.000451485
orange1.1t06036	-3.07319	2.65732	1.68578e-06	0.000506865
Cs3g21510	-1.19037	5.06718	1.88501e-06	0.000550341
orange1.1t04473	-2.27849	0.945235	1.96893e-06	0.00056663
Cs7g31790	1.32551	3.41359	3.11599e-06	0.000830826
Cs7g15760	1.21561	6.5738	3.13442e-06	0.000830826
Cs7g14270	2.39967	1.56238	3.49726e-06	0.000903234
Cs9g04050	5.35701	-0.155926	5.34275e-06	0.0013624
orange1.1t03541	2.07839	2.74461	6.35717e-06	0.00160081
orange1.1t04513	-2.08146	0.905759	6.73609e-06	0.00167529
Cs2g28800	1.0187	4.47102	8.02368e-06	0.00197118
Cs7g22760	-1.1839	3.82831	9.30046e-06	0.00215354
Cs3g01585	1.13097	7.98362	1.04331e-05	0.00238015
orange1.1t04419	1.72377	2.77123	1.09002e-05	0.00241301
Cs5g34830	1.60497	2.93281	1.12363e-05	0.00246039
orange1.1t01250	7.91466	0.408787	1.25347e-05	0.0027094
Cs6g07400	1.09288	5.06634	1.57499e-05	0.00327094
Cs6g17890	2.20854	1.00252	1.69617e-05	0.00347433
Cs8g01670	1.17358	5.18782	1.70742e-05	0.00347433
orange1.1t02800	-1.6382	3.4564	2.21562e-05	0.00433336
Cs2g01090	3.30894	-0.381728	2.46468e-05	0.00472866
Cs5g05410	1.71385	2.69239	2.81395e-05	0.00529785
Cs1g12950	7.55501	0.094164	3.40029e-05	0.00625697
Cs2g16260	1.088	6.96493	4.94072e-05	0.00850691
Cs7g03770	1.31422	5.24611	5.1631e-05	0.00881446
Cs8g08760	-1.20855	2.56875	5.85505e-05	0.00974794
orange1.1t01736	3.89647	-0.649676	6.47486e-05	0.0106045
orange1.1t05369	-5.35704	0.992605	6.95336e-05	0.0112964
Cs9g13580	1.89425	1.09354	7.53959e-05	0.0119594
orange1.1t02532	2.6387	0.0397665	9.65767e-05	0.0146281
orange1.1t03583	1.48302	2.43275	0.000107058	0.0158579
Cs2g08650	1.30625	2.84218	0.000121279	0.0174511
Cs8g13690	-4.316	-0.942229	0.000122414	0.0174895
Cs9g05630	-1.49723	2.48132	0.000125343	0.0177819
Cs2g04110	3.6501	-0.431411	0.000127765	0.0179988
Cs5g26210	-1.614	1.61882	0.000133828	0.0185256
Cs3g20970	1.17578	5.37606	0.00015159	0.0203585
Cs9g12220	1.95533	2.18614	0.000164202	0.0216199
Cs5g33320	1.67608	2.86069	0.000171336	0.0224127
Cs3g11715	2.2154	0.350528	0.000204685	0.0263413
Cs3g10620	2.13838	0.593526	0.000205658	0.0263413
Cs7g05180	-3.24221	-0.431347	0.000245584	0.0303514
Cs4g04530	3.87845	2.29994	0.000255091	0.0313342
Cs3g04020	-2.18113	0.689861	0.000265968	0.0324723
Cs5g18740	1.80713	1.03059	0.00028387	0.0342429
orange1.1t05258	2.8574	2.32749	0.000304591	0.0361382
Cs2g06270	2.7176	0.895128	0.000327563	0.0381431
orange1.1t00245	4.14745	-1.05488	0.000332175	0.0384578
Cs4g10140	1.56902	4.46011	0.000358132	0.0407602
Cs9g02930	1.37561	3.89611	0.000374767	0.042177
orange1.1t04562	4.20648	-1.01617	0.000377902	0.0422936
orange1.1t05089	-5.94102	1.05594	0.0003986	0.0443636
Cs5g19280	-5.53449	-1.40618	0.000410609	0.045449
Cs7g23790	3.81273	-0.709598	0.000413813	0.0455533
Cs5g16860	1.00118	7.91554	0.000423549	0.0463717
orange1.1t01749	1.22964	2.59347	0.000430965	0.046704
Cs7g05450	-3.48118	0.556652	0.00043122	0.046704
Cs8g19110	2.79239	2.80558	0.000450372	0.0476157
orange1.1t04489	1.56224	5.724	0.000463258	0.0478815
orange1.1t05430	-4.08719	-1.09439	0.000463485	0.0478815
Cs5g17210	-1.09594	3.38481	0.000468892	0.048193
Cs5g28730	1.59731	1.336	0.000493195	0.0499267

## Sheet: 230 Orange vs Brown
Gene_ID	logFC	logCPM	PValue	FDR
orange1.1t02947	4.06612	5.04254	3.10602e-75	6.17043e-71
Cs7g15150	3.75459	3.6086	8.82645e-35	8.76731e-31
Cs9g01400	-1.8578	5.95225	2.64632e-28	1.75239e-24
Cs9g17760	-1.47831	5.93738	2.63207e-18	1.30722e-14
Cs5g10040	-1.74011	7.66346	7.46833e-18	2.96732e-14
Cs2g21595	4.44682	1.69707	8.95024e-17	2.96343e-13
Cs7g13810	1.22959	7.34152	2.50274e-15	7.10277e-12
Cs2g01990	-5.18868	3.57289	3.38463e-14	8.40488e-11
orange1.1t06004	3.77837	2.08753	5.52589e-14	1.21975e-10
Cs7g17300	1.49518	4.63395	4.49887e-13	8.93745e-10
Cs7g13900	1.45073	4.60397	1.06403e-12	1.92163e-09
Cs7g15130	1.07153	7.52055	2.8884e-12	4.78175e-09
Cs7g14020	1.10517	7.8362	4.55341e-12	6.95831e-09
Cs5g09880	-1.05654	10.3638	3.98037e-11	5.64815e-08
Cs7g14050	1.04035	5.74334	4.3451e-10	5.75465e-07
Cs2g23820	1.9074	4.32807	6.04961e-10	7.51135e-07
Cs7g13940	1.71338	3.39903	1.07946e-09	1.26145e-06
Cs5g11730	1.44124	6.56015	1.64913e-09	1.82009e-06
Cs1g06390	-4.42228	0.545588	2.90692e-09	2.88744e-06
Cs2g21470	-2.63335	4.3558	3.09894e-09	2.93159e-06
Cs7g15170	2.97224	1.14676	6.4276e-09	5.55177e-06
orange1.1t05128	-5.04246	0.0250916	1.17824e-08	9.75292e-06
Cs9g17770	-1.40229	4.15194	1.57717e-08	1.25329e-05
orange1.1t00942	2.51235	1.4569	2.76469e-08	2.11243e-05
Cs7g13980	1.07949	5.80594	4.32357e-08	3.18119e-05
Cs5g20610	10.1396	2.26443	5.13354e-08	3.64225e-05
Cs5g16850	1.2265	7.02035	5.53548e-08	3.79199e-05
orange1.1t03541	2.49846	1.72696	6.18122e-08	4.0932e-05
orange1.1t05897	4.25388	1.51999	1.24457e-07	7.72645e-05
Cs2g31450	-1.24811	4.70901	3.72419e-07	0.000224196
Cs7g22990	-2.52544	2.26214	4.07135e-07	0.000237887
Cs9g17380	1.30795	8.62561	4.92575e-07	0.000279586
Cs7g15190	4.38854	0.244767	5.26951e-07	0.000290789
Cs5g06800	-3.19732	0.894152	5.53618e-07	0.000297248
Cs6g07700	-2.20844	4.47596	6.71549e-07	0.000351079
Cs7g13960	1.30289	3.30308	8.29495e-07	0.000411969
Cs9g05220	-1.20813	4.85388	1.13685e-06	0.000525224
Cs9g17780	6.92197	-0.66434	1.21736e-06	0.00054964
Cs7g13660	2.86349	1.53678	1.48918e-06	0.000657424
Cs5g18740	3.86193	0.28428	1.76913e-06	0.000764034
orange1.1t02397	4.32092	-0.140431	2.08667e-06	0.000881994
Cs3g23020	-1.06333	4.51696	2.14912e-06	0.000889469
Cs5g28655	-2.7431	1.60936	2.72204e-06	0.00110359
Cs8g13740	1.00362	6.56388	3.349e-06	0.00133062
orange1.1t04513	-2.39278	1.36515	3.44188e-06	0.00134071
Cs3g23040	-1.22257	4.3062	4.35295e-06	0.001663
orange1.1t04700	-4.14047	1.17958	6.7575e-06	0.00248601
Cs9g04120	1.51464	2.75514	1.61825e-05	0.00574075
Cs9g15430	1.03923	7.12235	1.70782e-05	0.00595219
Cs5g23510	1.12185	6.73575	1.80613e-05	0.00618631
Cs1g14090	-1.79704	1.83204	1.89959e-05	0.00639615
Cs8g20130	1.72827	4.33053	2.3512e-05	0.00778481
Cs2g16500	1.30158	4.00617	2.50442e-05	0.00815619
Cs7g02450	-6.59744	0.690401	2.76631e-05	0.00886379
Cs1g22410	-1.77685	2.00458	4.72503e-05	0.0140101
Cs6g08500	1.34807	5.94367	4.9678e-05	0.0145133
Cs7g15360	-1.06665	3.57581	5.52063e-05	0.0156675
Cs7g31790	1.3491	4.23376	5.72601e-05	0.0160215
Cs3g25140	1.83494	4.39622	6.35056e-05	0.0170725
Cs4g02570	-2.11244	3.84361	6.72486e-05	0.0178128
orange1.1t06036	-1.92427	2.34714	8.96365e-05	0.0228297
Cs5g23840	1.70601	1.87694	0.000102233	0.0257083
Cs7g14360	-5.9607	-1.36899	0.000120748	0.0292535
Cs7g02970	-4.96849	1.03248	0.000128701	0.0308044
Cs2g25080	2.72746	-0.269126	0.000155833	0.0364209
Cs9g06010	1.45812	2.09849	0.000161016	0.036895
Cs1g24440	1.02435	10.2964	0.00016525	0.0373053
Cs1g25530	-1.43151	4.71791	0.000183398	0.0409369
orange1.1t01250	5.98063	0.133478	0.000190236	0.0419914

## Sheet: 190vs210 Orange
Gene_ID	logFC	logCPM	PValue	FDR
Cs1g02750	5.1657	4.98537	3.5845e-78	7.32528e-74
orange1.1t03024	3.38197	5.38383	7.16733e-63	7.32358e-59
orange1.1t00580	2.51974	6.4824	4.0661e-52	2.76983e-48
Cs9g17380	3.63898	7.281	8.91778e-45	4.55609e-41
Cs7g13200	-1.93539	7.93511	2.91086e-44	1.18973e-40
Cs2g26590	-3.79083	5.00489	1.23938e-43	4.22134e-40
Cs9g07420	-2.33609	5.71374	1.07838e-42	3.14825e-39
Cs1g13620	2.19147	9.53459	2.43573e-41	6.22208e-38
orange1.1t02719	-1.85631	7.60016	4.94487e-36	1.12282e-32
Cs2g03110	-2.13371	9.9102	6.53568e-36	1.33563e-32
Cs2g10570	2.24573	6.17116	1.2807e-34	2.3793e-31
Cs9g15430	3.16817	4.80288	2.07429e-34	3.53251e-31
Cs5g10550	2.97499	8.1132	4.78594e-33	7.52349e-30
Cs3g01585	4.07947	6.43907	6.16469e-33	8.99869e-30
Cs7g28340	-3.07459	5.72685	7.38145e-33	1.00565e-29
Cs4g13020	-1.7334	6.75673	1.8817e-32	2.4034e-29
Cs3g03135	-3.11221	4.2759	3.43049e-32	4.12385e-29
orange1.1t02321	-2.50053	5.96087	4.02741e-32	4.57246e-29
orange1.1t01993	2.06593	10.3299	1.00144e-30	1.07713e-27
Cs6g17190	-2.69818	5.35821	1.36599e-30	1.39576e-27
Cs4g05490	1.67661	8.27938	4.74651e-30	4.61903e-27
Cs6g12870	1.86243	8.60273	1.09806e-28	9.86433e-26
Cs7g30170	-2.14651	5.13548	1.1102e-28	9.86433e-26
Cs6g11570	-2.74797	5.88848	1.82451e-28	1.55357e-25
Cs9g19340	-1.91456	5.62841	4.29259e-28	3.50893e-25
Cs2g09840	2.65648	3.98117	4.46469e-28	3.50924e-25
Cs6g09960	2.18908	10.3133	1.08321e-27	8.19873e-25
Cs3g25420	2.01062	9.36852	1.90875e-27	1.39311e-24
Cs8g14150	1.6345	9.23901	1.98463e-27	1.39855e-24
Cs8g09780	3.53146	6.86429	4.71127e-27	3.20932e-24
Cs2g20010	-1.75079	7.53881	8.91614e-27	5.87775e-24
Cs1g25830	-1.90397	6.51413	1.15585e-26	7.35825e-24
Cs3g21730	-2.45798	5.9601	1.18821e-26	7.35825e-24
Cs7g20030	-4.06029	4.85663	3.46239e-26	2.0811e-23
orange1.1t00436	1.72507	6.35391	4.32938e-26	2.52786e-23
Cs4g03330	1.50119	7.4252	7.71635e-26	4.29692e-23
Cs7g10570	3.19536	4.02219	7.7797e-26	4.29692e-23
Cs3g27650	-9.17761	1.61412	1.32392e-25	7.11989e-23
Cs1g01220	-2.76995	3.758	1.55927e-25	8.17059e-23
orange1.1t00634	2.95625	4.6486	3.00384e-25	1.53466e-22
Cs5g05050	-1.36202	8.51184	3.44093e-25	1.71509e-22
Cs8g17160	2.03982	5.83925	7.07243e-25	3.44124e-22
Cs9g16640	2.29947	7.73222	7.37257e-25	3.50386e-22
orange1.1t04497	-2.57674	5.73616	1.42871e-24	6.63569e-22
Cs8g04550	-3.00252	4.46661	1.49333e-24	6.78172e-22
Cs6g05140	-1.46411	9.02892	1.65775e-24	7.36472e-22
Cs9g17330	-2.639	4.11863	6.81713e-24	2.96415e-21
Cs1g23450	-3.24706	6.05262	7.30396e-24	3.10966e-21
Cs4g06710	-3.10303	3.20458	7.56282e-24	3.11029e-21
Cs5g16360	2.03722	5.61929	7.60982e-24	3.11029e-21
Cs7g03630	-1.8219	8.85276	2.22918e-23	8.93245e-21
Cs1g12430	2.35379	4.48603	2.78955e-23	1.09629e-20
Cs2g29430	-2.61689	3.84486	5.06217e-23	1.95189e-20
Cs2g22650	-2.57651	4.36202	6.73281e-23	2.548e-20
Cs3g21160	-2.09176	7.41552	8.00691e-23	2.97508e-20
Cs2g22040	-3.62642	4.10884	2.79342e-22	1.0194e-19
Cs1g06850	-2.84488	3.65643	3.8277e-22	1.37233e-19
Cs2g22100	-3.39582	5.03778	4.49118e-22	1.58244e-19
Cs3g05310	5.02351	1.77688	4.83871e-22	1.676e-19
Cs2g14940	-3.26146	4.80261	5.44355e-22	1.85407e-19
Cs5g13010	1.64661	5.57978	5.55707e-22	1.86171e-19
Cs2g10620	-2.33678	5.7665	7.27046e-22	2.39644e-19
Cs4g13160	-1.79847	6.22444	1.04095e-21	3.37663e-19
Cs4g15270	-1.26822	9.88355	1.37316e-21	4.38466e-19
Cs1g15830	-1.73594	5.91801	2.10016e-21	6.60289e-19
Cs2g26610	-3.58213	4.05262	2.84027e-21	8.79452e-19
Cs5g08460	-2.13745	4.39598	5.35858e-21	1.63445e-18
Cs6g09640	1.36318	6.90987	6.10985e-21	1.83619e-18
Cs7g31930	2.25419	4.92718	6.87773e-21	2.037e-18
Cs5g08910	-3.1467	4.02003	7.93508e-21	2.28684e-18
Cs3g06840	-2.00289	5.43924	7.94507e-21	2.28684e-18
Cs8g02450	-1.25412	6.88012	8.12719e-21	2.30677e-18
Cs6g22390	-5.33645	1.88733	9.93082e-21	2.78009e-18
Cs3g12510	-3.06277	3.64581	1.15081e-20	3.17811e-18
Cs6g13860	-2.63673	3.58655	1.38316e-20	3.76884e-18
Cs3g03045	-3.38728	4.46452	2.36146e-20	6.34985e-18
Cs6g16900	-1.42234	7.44122	2.58917e-20	6.87173e-18
Cs8g19010	-3.05098	3.60513	2.80524e-20	7.34974e-18
Cs2g14720	-2.48074	5.40008	2.84266e-20	7.35349e-18
Cs4g19660	-2.03292	5.59192	6.74428e-20	1.72283e-17
Cs6g21120	-4.41363	2.42253	1.05339e-19	2.65767e-17
Cs2g30590	-1.24438	6.59643	1.17794e-19	2.93566e-17
Cs6g08600	1.18081	9.11297	1.31171e-19	3.22965e-17
Cs6g12480	1.75801	6.09154	1.54613e-19	3.76151e-17
Cs2g19010	-1.24359	6.89147	1.6213e-19	3.89798e-17
Cs2g28420	-3.45457	4.024	1.76938e-19	4.20455e-17
Cs5g11630	1.90283	6.09825	2.00011e-19	4.6982e-17
Cs5g24680	-1.35543	8.41866	2.27755e-19	5.28908e-17
Cs8g09350	-4.14278	2.17343	2.51496e-19	5.77479e-17
Cs3g23440	2.03269	6.1951	2.8093e-19	6.37899e-17
Cs7g31190	-2.60985	5.03158	4.14335e-19	9.30477e-17
Cs4g03320	-3.05431	2.89762	4.75689e-19	1.05211e-16
orange1.1t02319	1.87364	5.03058	4.78792e-19	1.05211e-16
Cs7g23810	-1.61221	4.73848	6.34399e-19	1.37921e-16
Cs2g31410	4.65245	1.76529	6.7465e-19	1.45128e-16
Cs5g15150	-2.04859	5.39854	1.02577e-18	2.18361e-16
Cs2g18800	-1.19791	7.30789	1.12362e-18	2.36726e-16
Cs6g12430	-4.06249	4.58639	1.81085e-18	3.77617e-16
orange1.1t03296	8.50339	0.975491	1.98874e-18	4.10525e-16
Cs4g06630	-2.13344	5.1661	2.08318e-18	4.25718e-16
Cs7g09200	-1.73406	4.47546	2.1271e-18	4.30389e-16
Cs1g03700	-5.97708	2.25535	2.73551e-18	5.48067e-16
Cs3g14550	2.19932	7.71845	3.04208e-18	6.03573e-16
orange1.1t02046	-2.57152	3.50804	3.72427e-18	7.31819e-16
Cs1g06830	-1.78841	4.71043	4.13229e-18	8.04262e-16
Cs2g13390	-1.15622	6.94639	4.99941e-18	9.63849e-16
Cs3g18490	-1.40552	6.31172	5.36046e-18	1.0238e-15
Cs9g03190	-1.65697	4.9282	5.45701e-18	1.03259e-15
Cs1g24950	-1.63376	5.22938	7.29412e-18	1.36755e-15
Cs2g06890	-1.71409	5.73227	7.92364e-18	1.47207e-15
Cs4g13440	-2.63053	4.06223	8.04962e-18	1.482e-15
Cs2g30260	1.29302	7.2569	9.46753e-18	1.72749e-15
Cs4g16200	-1.43514	5.02393	9.70841e-18	1.75576e-15
Cs2g17100	-1.56852	5.61429	1.08393e-17	1.94308e-15
orange1.1t04613	2.10695	5.50678	1.22432e-17	2.17567e-15
Cs8g07330	-4.99224	2.09925	1.89537e-17	3.33912e-15
orange1.1t01469	-2.79677	2.83453	2.10693e-17	3.6801e-15
Cs8g18970	-1.22462	5.88972	2.22197e-17	3.82226e-15
Cs5g30100	-1.42808	6.33138	2.22572e-17	3.82226e-15
Cs1g16670	-1.6849	5.04369	2.30641e-17	3.92782e-15
Cs7g19720	-3.8779	2.34557	2.57669e-17	4.35184e-15
Cs8g06630	-3.91744	2.60379	2.83948e-17	4.75636e-15
Cs1g10540	-2.43432	6.59899	3.28698e-17	5.46119e-15
Cs7g11860	-1.58122	4.46535	3.47701e-17	5.73033e-15
Cs6g02180	-1.36819	6.1992	3.88331e-17	6.34875e-15
Cs4g08750	-2.25392	5.10872	4.29112e-17	6.95979e-15
Cs2g04470	-1.31594	5.68661	4.63542e-17	7.45901e-15
Cs9g02570	1.69873	4.57206	5.04831e-17	8.05993e-15
orange1.1t00617	-2.81607	3.12578	5.15625e-17	8.16846e-15
Cs8g09720	1.29803	8.95918	5.3104e-17	8.34796e-15
Cs8g04280	1.4427	6.33256	1.048e-16	1.63488e-14
Cs2g28370	1.83033	7.49774	1.08711e-16	1.68304e-14
Cs3g25000	-1.5819	4.71904	1.1331e-16	1.74106e-14
Cs3g01480	-1.96865	4.87768	1.14634e-16	1.74825e-14
Cs1g13850	1.07136	7.06371	1.84342e-16	2.78606e-14
Cs2g06900	-1.22301	5.58521	1.8541e-16	2.78606e-14
Cs3g20970	3.38449	3.85632	2.17572e-16	3.24547e-14
Cs5g15190	1.06758	8.69835	2.51965e-16	3.73127e-14
Cs1g02740	1.65643	5.12519	2.78462e-16	4.094e-14
Cs6g07970	1.52443	9.90598	3.53086e-16	5.15404e-14
Cs5g02430	-2.88229	3.6644	3.75822e-16	5.44702e-14
Cs1g13300	-4.0981	2.71592	4.07377e-16	5.86278e-14
Cs8g05940	-2.76106	3.32266	4.40539e-16	6.2957e-14
Cs2g30480	2.28569	4.46593	4.76146e-16	6.75731e-14
Cs5g33130	-1.63907	4.6769	5.18842e-16	7.31246e-14
Cs5g32270	-3.41615	2.58818	5.73867e-16	8.03256e-14
Cs8g08250	1.23003	6.53243	5.79843e-16	8.061e-14
Cs7g12410	1.33321	7.67161	6.22273e-16	8.59241e-14
Cs5g09220	1.09242	7.79634	6.95312e-16	9.53651e-14
Cs9g14150	2.31383	5.66347	7.44941e-16	1.01491e-13
Cs7g15480	-1.43099	6.43612	8.12135e-16	1.09912e-13
Cs7g08730	-1.44414	5.59737	8.29976e-16	1.11588e-13
Cs7g22555	-1.5423	4.9491	8.52704e-16	1.13894e-13
Cs8g03410	-3.11034	4.66742	1.04784e-15	1.39049e-13
Cs7g31975	-1.43684	5.65476	1.10346e-15	1.45485e-13
Cs8g14690	-1.91946	5.36709	1.20819e-15	1.58273e-13
Cs1g24440	1.89354	8.16671	1.34431e-15	1.74983e-13
Cs5g19060	1.7743	7.86704	1.37077e-15	1.77298e-13
Cs5g11430	-1.28752	5.78598	1.44066e-15	1.85166e-13
orange1.1t04404	1.18885	7.51274	1.46668e-15	1.87331e-13
Cs1g21920	-2.2055	3.93121	1.48446e-15	1.88425e-13
Cs2g29780	3.60457	2.13896	1.80298e-15	2.27443e-13
Cs4g12760	2.46877	3.07392	1.86604e-15	2.33953e-13
orange1.1t04983	-1.74864	5.96849	2.11506e-15	2.63557e-13
Cs6g15560	-1.07921	6.57701	2.20895e-15	2.73589e-13
orange1.1t02409	1.16914	9.19237	2.44229e-15	3.00666e-13
Cs8g08270	-1.83991	6.34858	2.74209e-15	3.35553e-13
Cs9g06490	2.3197	5.69332	2.83553e-15	3.44922e-13
Cs5g25680	-2.95249	5.90725	2.86578e-15	3.46539e-13
orange1.1t04699	-1.46682	5.59898	2.92004e-15	3.51023e-13
Cs6g17360	-1.70158	5.11761	2.9638e-15	3.54201e-13
Cs3g15740	1.24148	6.35259	2.98431e-15	3.54578e-13
Cs5g08670	-1.93587	3.58113	3.34703e-15	3.95375e-13
Cs4g06030	-3.66369	2.47194	3.62804e-15	4.26108e-13
orange1.1t04220	-3.05083	3.51417	3.8277e-15	4.46988e-13
Cs1g23230	-2.49955	3.3993	4.20931e-15	4.88759e-13
Cs7g18780	-1.90896	5.19936	4.5485e-15	5.25159e-13
Cs1g26650	1.06475	8.60224	4.87976e-15	5.6024e-13
orange1.1t02754	1.09918	8.39923	5.02434e-15	5.73617e-13
Cs9g05630	4.08484	2.17849	5.21287e-15	5.91834e-13
Cs2g15230	1.21533	5.47091	5.45984e-15	6.16449e-13
Cs7g01530	-2.20257	6.61244	6.02978e-15	6.77058e-13
Cs7g03680	-4.17673	1.35433	6.96339e-15	7.77616e-13
orange1.1t05560	-4.60826	2.33757	8.00037e-15	8.88563e-13
Cs5g04290	-1.17414	6.20344	9.58538e-15	1.05885e-12
Cs8g16930	-1.58295	4.9798	1.01819e-14	1.1187e-12
Cs7g21940	-1.34669	5.43039	1.07634e-14	1.17191e-12
Cs7g22980	-2.94147	2.31582	1.07809e-14	1.17191e-12
Cs3g25900	-2.28194	3.71082	1.28974e-14	1.39456e-12
orange1.1t02003	-1.84545	5.20707	1.43173e-14	1.53197e-12
Cs3g15830	1.23464	7.75942	1.43182e-14	1.53197e-12
Cs5g18500	-1.78323	5.05108	1.57576e-14	1.6772e-12
Cs1g17420	1.04309	8.55567	1.71637e-14	1.81739e-12
Cs5g10530	-1.45458	6.53753	1.80315e-14	1.89944e-12
Cs7g09900	-3.95707	2.53258	1.98012e-14	2.07516e-12
Cs6g06530	-1.35448	8.2303	2.45822e-14	2.56308e-12
Cs5g12900	1.10328	8.04181	2.55385e-14	2.64926e-12
Cs2g28140	-5.18018	1.94294	2.58056e-14	2.66345e-12
Cs2g05960	-1.57847	4.68955	3.03992e-14	3.1218e-12
orange1.1t05522	-1.6464	8.39443	3.12657e-14	3.19473e-12
orange1.1t02041	1.06945	6.48544	3.31678e-14	3.37222e-12
Cs8g05460	-1.50668	5.42988	3.45459e-14	3.49495e-12
Cs2g02180	-1.09882	7.97312	3.64487e-14	3.66929e-12
orange1.1t02547	1.62045	6.04243	3.97085e-14	3.97786e-12
Cs2g22050	-3.42358	2.39407	4.36623e-14	4.35259e-12
Cs9g14040	-1.18616	6.02928	4.3985e-14	4.36348e-12
Cs2g30865	-1.61611	3.92429	4.47821e-14	4.4211e-12
Cs5g26220	-1.05579	7.82295	4.6281e-14	4.5471e-12
Cs7g27350	3.69635	1.49046	4.68157e-14	4.57764e-12
Cs8g01260	-1.49471	4.53856	4.98727e-14	4.83088e-12
Cs5g06720	1.12006	8.63205	4.98784e-14	4.83088e-12
Cs5g25950	2.52194	5.48495	6.36374e-14	6.13441e-12
Cs8g13800	-2.74115	2.55328	6.46149e-14	6.19939e-12
Cs4g06850	-1.14279	9.06493	6.61388e-14	6.31595e-12
Cs3g06820	2.076	3.78088	6.79951e-14	6.46301e-12
Cs1g21050	-1.61216	7.29175	6.86437e-14	6.49446e-12
Cs3g21530	-1.20796	8.00984	7.0219e-14	6.61288e-12
Cs1g23200	1.70941	6.88079	7.21534e-14	6.76388e-12
Cs7g32220	1.28487	8.88824	8.06887e-14	7.52947e-12
Cs2g07330	-3.29452	3.41475	8.26508e-14	7.67751e-12
orange1.1t04360	-2.5012	4.80111	1.14354e-13	1.05744e-11
Cs9g09120	-3.18908	1.95407	1.41126e-13	1.29912e-11
Cs3g26760	-3.40437	2.24026	1.72515e-13	1.58095e-11
Cs7g16680	-2.8553	2.81814	1.8012e-13	1.64327e-11
orange1.1t01269	-1.84547	3.78715	1.85519e-13	1.68501e-11
Cs2g04490	1.59349	4.66069	1.88879e-13	1.70794e-11
Cs3g27280	-1.06396	9.14194	2.13964e-13	1.92624e-11
Cs9g06010	4.75174	1.09752	2.26932e-13	2.03403e-11
Cs5g03580	-2.07176	3.77976	2.37318e-13	2.11783e-11
orange1.1t00255	-3.68218	2.22764	2.41369e-13	2.14344e-11
Cs1g20120	3.09129	2.12555	2.42286e-13	2.14344e-11
Cs3g27360	1.78067	6.00988	2.44353e-13	2.14581e-11
Cs6g04060	1.49423	5.57472	2.44654e-13	2.14581e-11
Cs7g31010	1.6312	5.71869	2.47283e-13	2.1596e-11
orange1.1t03813	-4.35593	1.36175	2.5022e-13	2.17595e-11
orange1.1t00272	-2.91354	1.86215	2.54246e-13	2.19625e-11
Cs4g07040	2.99208	2.67198	2.61263e-13	2.24335e-11
Cs2g02520	1.06342	9.30495	2.78679e-13	2.38288e-11
Cs1g21820	-1.9046	5.0153	2.98672e-13	2.54319e-11
Cs4g09550	-1.77735	8.68046	3.17392e-13	2.69138e-11
Cs3g03970	2.67098	3.19903	3.39476e-13	2.86675e-11
orange1.1t02029	-1.81182	5.35952	3.45526e-13	2.90583e-11
Cs9g04830	-4.69634	1.49687	3.53521e-13	2.96088e-11
Cs2g10690	-1.32846	8.46207	3.68238e-13	3.07155e-11
Cs5g09050	-1.42526	4.5219	3.83345e-13	3.18457e-11
orange1.1t04182	1.50287	11.2763	3.94916e-13	3.26741e-11
Cs4g13640	-1.59593	5.21529	4.13565e-13	3.40791e-11
Cs7g26690	-5.07499	1.8453	4.3654e-13	3.58278e-11
Cs5g32450	-1.26209	5.52834	4.4061e-13	3.60173e-11
Cs1g22620	1.05298	7.82188	4.53418e-13	3.69166e-11
Cs5g30500	-1.14503	5.89636	4.76598e-13	3.86498e-11
Cs1g09140	-2.99916	2.92049	4.87659e-13	3.93905e-11
Cs5g33940	-1.55073	4.75365	5.2891e-13	4.25544e-11
Cs6g19205	1.59166	5.19047	5.55926e-13	4.45525e-11
Cs9g14610	-1.69377	4.69663	5.73108e-13	4.57501e-11
Cs7g01980	-4.14785	2.25568	5.9887e-13	4.76206e-11
Cs5g25740	2.87278	2.79145	6.02838e-13	4.77504e-11
Cs1g08380	-1.48454	4.87447	6.11011e-13	4.82109e-11
Cs6g18640	-1.06754	6.74274	6.42915e-13	5.05331e-11
Cs7g28970	-2.44113	2.55688	7.5171e-13	5.88581e-11
Cs1g22140	1.10785	6.32277	8.32643e-13	6.49461e-11
orange1.1t00405	-1.23676	5.24862	9.31515e-13	7.23819e-11
Cs2g09850	1.56237	4.49002	1.01348e-12	7.84525e-11
Cs3g14610	1.9365	5.84053	1.02938e-12	7.93825e-11
Cs7g20870	1.28219	5.79415	1.07486e-12	8.22692e-11
Cs2g28960	1.23745	5.84088	1.19596e-12	9.11965e-11
Cs6g19640	1.01297	6.32159	1.46209e-12	1.11076e-10
Cs1g20890	-1.4779	4.79502	1.54558e-12	1.16983e-10
Cs9g16680	-1.04282	6.13916	1.70338e-12	1.28451e-10
Cs4g05900	-3.59328	1.4205	1.81666e-12	1.3649e-10
Cs6g18250	1.05677	6.48542	1.8436e-12	1.38007e-10
Cs2g03490	-4.62853	1.76277	1.88554e-12	1.40631e-10
Cs1g20460	-1.77084	3.67766	1.91206e-12	1.4209e-10
Cs3g19430	-1.04253	6.14565	1.95228e-12	1.44553e-10
Cs5g04020	1.32241	4.89114	2.02336e-12	1.49276e-10
Cs2g19380	-1.99513	4.37378	2.49093e-12	1.8311e-10
Cs2g13230	-1.27482	4.80655	2.49989e-12	1.8311e-10
Cs4g08360	-3.19385	3.30323	2.55455e-12	1.86446e-10
Cs2g04190	-1.34006	4.53368	2.69894e-12	1.96283e-10
Cs7g11620	-1.5914	7.63787	2.78092e-12	2.01528e-10
orange1.1t00573	-2.81856	2.66932	2.85543e-12	2.06196e-10
Cs5g03420	1.36476	5.24072	3.25845e-12	2.34471e-10
Cs5g01440	2.2666	2.75108	3.31163e-12	2.37461e-10
Cs4g07790	1.2427	5.99141	3.65485e-12	2.61156e-10
Cs9g14690	1.37753	5.37466	3.73162e-12	2.65712e-10
Cs7g01700	-3.0113	2.62305	3.8406e-12	2.72522e-10
Cs2g20030	-1.23584	6.0486	4.13956e-12	2.9272e-10
Cs2g15360	-1.2565	6.85365	4.61319e-12	3.23349e-10
orange1.1t02662	1.34056	5.18855	4.62018e-12	3.23349e-10
Cs8g13740	1.67855	4.87689	5.01363e-12	3.48499e-10
Cs8g16290	1.05887	6.34945	5.28805e-12	3.66327e-10
orange1.1t04376	1.04027	11.3596	5.37985e-12	3.71427e-10
Cs7g24340	1.69982	4.38336	5.71212e-12	3.9304e-10
Cs1g18400	-1.47723	4.76516	5.90188e-12	4.04734e-10
Cs4g14890	1.82718	4.79861	6.03042e-12	4.12166e-10
Cs1g07420	-2.07657	2.75797	6.09956e-12	4.15502e-10
Cs6g09030	1.44716	4.19166	6.29382e-12	4.27311e-10
Cs1g23710	-1.49961	4.65201	6.70022e-12	4.519e-10
Cs2g03080	-4.34533	2.58152	6.99056e-12	4.69932e-10
Cs3g24260	2.67311	4.92888	7.54612e-12	5.05615e-10
Cs8g02530	-5.10739	1.16159	7.75491e-12	5.17906e-10
Cs8g17390	-1.39235	5.32107	8.036e-12	5.3493e-10
Cs2g26640	-3.14523	1.29356	8.33953e-12	5.51543e-10
Cs2g06150	-1.26043	5.21846	8.37707e-12	5.52238e-10
Cs4g18090	1.81212	6.44969	9.36793e-12	6.15572e-10
Cs5g06400	-1.35817	4.90768	9.77251e-12	6.38883e-10
orange1.1t00589	-3.16753	1.77498	9.81545e-12	6.38883e-10
Cs4g17340	-1.26127	5.88074	9.81646e-12	6.38883e-10
Cs2g27090	-1.94973	3.74763	9.92949e-12	6.44187e-10
Cs9g03730	-1.2678	5.66437	1.02959e-11	6.64644e-10
Cs1g15170	-2.43777	3.3719	1.12248e-11	7.2135e-10
Cs4g09900	-2.73387	2.13984	1.15909e-11	7.40224e-10
Cs2g12510	-2.58441	2.63288	1.20389e-11	7.66439e-10
orange1.1t01353	-2.24214	6.92422	1.2693e-11	8.05571e-10
Cs2g06640	1.79029	4.1968	1.31022e-11	8.26406e-10
Cs4g15260	-1.47394	4.04	1.3425e-11	8.42289e-10
Cs5g25420	-2.8612	1.5706	1.34364e-11	8.42289e-10
Cs7g20060	-2.83124	2.37995	1.43998e-11	8.98465e-10
Cs7g31000	1.53532	7.00459	1.56248e-11	9.70545e-10
Cs2g21150	1.81584	3.66821	1.91459e-11	1.18565e-09
Cs2g17980	-2.13749	7.19875	1.99881e-11	1.23407e-09
Cs6g13820	1.54798	5.5093	2.12422e-11	1.30755e-09
orange1.1t03382	1.58543	4.39484	2.15744e-11	1.32401e-09
Cs6g07420	1.07532	6.26157	2.31605e-11	1.41709e-09
Cs4g16650	1.36754	5.60322	2.3234e-11	1.41734e-09
Cs1g03210	-1.94704	3.75201	2.62392e-11	1.59591e-09
Cs6g20220	-4.15124	1.91804	2.6357e-11	1.59831e-09
orange1.1t01704	4.96093	2.19163	2.67002e-11	1.61433e-09
Cs2g15270	-2.41686	4.82567	2.72166e-11	1.6407e-09
Cs5g12040	-1.6579	3.74366	2.73424e-11	1.64344e-09
Cs1g24330	-1.00712	6.27905	2.83727e-11	1.70037e-09
Cs1g08610	4.76105	0.830959	2.85618e-11	1.70669e-09
Cs2g03890	-1.59596	3.45611	3.75345e-11	2.22981e-09
Cs6g15800	-1.13451	6.59986	3.79953e-11	2.25064e-09
Cs1g25670	-2.46001	2.75163	4.13727e-11	2.43588e-09
Cs1g08150	-1.79893	3.17253	4.148e-11	2.43588e-09
orange1.1t03603	1.18653	6.80354	4.19995e-11	2.45932e-09
orange1.1t04588	-1.43092	4.15653	4.43805e-11	2.59132e-09
Cs9g04630	-1.48113	4.93807	4.5354e-11	2.64061e-09
Cs1g21000	1.28639	4.77505	4.85801e-11	2.82041e-09
Cs5g04740	-1.07214	7.79087	4.93811e-11	2.85879e-09
Cs3g27520	-1.47826	4.12919	5.21677e-11	3.01158e-09
Cs6g21460	-1.11743	9.27111	5.48274e-11	3.1562e-09
Cs9g02540	-2.15969	2.47011	5.69336e-11	3.26824e-09
orange1.1t03325	1.28857	5.68216	5.84231e-11	3.34435e-09
Cs8g08760	-1.41256	3.94594	7.03896e-11	3.99578e-09
Cs2g30710	1.00177	6.93164	7.17103e-11	4.05948e-09
Cs2g13280	-2.13588	3.36697	7.19855e-11	4.0638e-09
Cs6g16780	-2.39718	3.00212	7.56067e-11	4.25647e-09
Cs1g25510	-1.24194	5.37146	7.79552e-11	4.37663e-09
Cs2g09620	-1.11725	5.48939	8.38057e-11	4.6922e-09
Cs5g20790	-1.21902	4.56771	8.40566e-11	4.69339e-09
Cs4g06230	-1.49404	4.12813	8.66367e-11	4.82427e-09
Cs5g27580	1.11831	7.40457	9.34653e-11	5.19037e-09
Cs4g02520	1.06499	8.55849	9.56353e-11	5.28217e-09
Cs2g17570	-1.17378	5.73709	9.65918e-11	5.30548e-09
Cs7g22760	1.91283	3.68801	9.68361e-11	5.30548e-09
Cs5g06250	-1.20757	4.7644	1.02409e-10	5.59578e-09
Cs7g22600	-1.20882	5.43416	1.03737e-10	5.65327e-09
Cs2g01910	-1.82476	6.71951	1.04995e-10	5.69143e-09
Cs6g09340	-4.47549	0.603211	1.12183e-10	6.06502e-09
Cs4g15440	-2.78991	2.00767	1.12778e-10	6.08107e-09
Cs4g05980	-4.45978	1.45561	1.21265e-10	6.52153e-09
Cs6g07690	1.01523	7.27058	1.21827e-10	6.53454e-09
Cs9g06110	-3.06511	2.28029	1.2459e-10	6.66525e-09
Cs4g17505	-3.5728	2.07252	1.28341e-10	6.83761e-09
orange1.1t04996	1.08835	5.99172	1.28481e-10	6.83761e-09
Cs7g04380	5.13376	0.819531	1.33049e-10	7.0623e-09
Cs1g05180	-4.03219	1.07373	1.34645e-10	7.12854e-09
Cs6g09440	-1.25318	5.08202	1.45558e-10	7.62776e-09
Cs2g06620	1.0341	10.5363	1.55704e-10	8.11725e-09
Cs4g03870	-4.99277	0.262616	1.58347e-10	8.23404e-09
Cs1g25850	-1.47848	4.88743	1.60253e-10	8.31201e-09
Cs1g06880	-1.17734	5.08782	1.72649e-10	8.93228e-09
Cs2g27100	-1.31362	5.50099	1.74825e-10	9.02204e-09
Cs3g19060	-2.34949	7.54906	1.77078e-10	9.11529e-09
Cs1g19320	-1.09342	6.2117	1.84879e-10	9.46915e-09
Cs6g09530	-1.26501	4.21912	1.99902e-10	1.0213e-08
Cs8g08680	-7.95135	0.484322	2.00738e-10	1.02301e-08
Cs1g20920	-1.39297	6.48437	2.08689e-10	1.06089e-08
Cs7g11810	-1.14826	4.89693	2.2278e-10	1.1278e-08
Cs7g24940	1.3993	5.15445	2.22956e-10	1.1278e-08
orange1.1t03155	1.72344	3.75835	2.47529e-10	1.24594e-08
Cs4g15735	2.35122	5.22115	2.64031e-10	1.32249e-08
Cs8g06470	-1.1382	6.59134	2.77505e-10	1.38658e-08
orange1.1t01124	3.01768	1.885	2.82087e-10	1.40603e-08
Cs3g25820	-1.17083	4.45308	2.89072e-10	1.43734e-08
Cs8g20420	1.77756	5.11139	2.95521e-10	1.46584e-08
Cs1g22540	2.11658	4.34847	3.29361e-10	1.61411e-08
Cs2g23280	-2.06297	5.39316	3.30828e-10	1.61742e-08
Cs5g13180	-1.66863	3.34526	3.42226e-10	1.66915e-08
Cs9g17270	1.10669	6.92751	3.52379e-10	1.71457e-08
Cs6g07130	-1.2689	6.70176	3.72069e-10	1.80608e-08
Cs1g16220	1.01311	5.52625	3.85696e-10	1.86779e-08
Cs1g21830	-1.85316	4.02488	3.87915e-10	1.8741e-08
Cs6g10500	-2.31459	2.12267	3.97259e-10	1.91471e-08
Cs7g06720	-1.52522	4.5158	4.23423e-10	2.03124e-08
Cs2g08540	-3.29849	1.88793	4.6469e-10	2.22398e-08
Cs2g12990	-1.11738	5.32948	4.74644e-10	2.26631e-08
Cs4g14150	-3.20233	1.26169	4.77816e-10	2.27614e-08
Cs6g03020	1.79003	6.59598	4.93989e-10	2.34771e-08
Cs7g13250	-1.66306	5.36209	5.02161e-10	2.38101e-08
Cs5g23050	-1.27088	4.52549	5.81801e-10	2.74589e-08
Cs4g01980	-1.09273	5.73076	6.15821e-10	2.89746e-08
orange1.1t02914	1.75853	4.02588	6.29762e-10	2.9518e-08
Cs1g19740	-1.08156	5.15697	6.38503e-10	2.98592e-08
orange1.1t04496	-1.51513	4.24616	6.47148e-10	3.01944e-08
Cs2g23870	1.5876	3.5227	6.63597e-10	3.07512e-08
Cs7g07120	-1.04895	6.21417	6.92805e-10	3.19597e-08
Cs9g14190	-1.74336	3.28503	7.63751e-10	3.51532e-08
Cs2g25450	2.18163	2.58013	8.17821e-10	3.75573e-08
orange1.1t01766	-1.68828	3.2696	8.60775e-10	3.9353e-08
Cs8g08590	-1.01271	5.1007	8.79966e-10	4.01406e-08
Cs2g22680	-1.24432	4.37456	8.83095e-10	4.01936e-08
Cs6g11600	-1.16656	6.453	9.0843e-10	4.12548e-08
Cs3g03350	-3.93294	0.628478	9.12696e-10	4.13567e-08
Cs8g03680	-1.54862	6.9522	9.52164e-10	4.30496e-08
Cs2g04800	-1.92861	2.82473	9.80567e-10	4.42359e-08
orange1.1t01624	-1.90838	2.88573	1.05521e-09	4.74984e-08
Cs8g02780	-1.06547	7.86641	1.06164e-09	4.7683e-08
Cs4g12020	-1.97914	2.4387	1.06952e-09	4.79315e-08
Cs7g16840	-1.48272	4.346	1.12745e-09	5.01972e-08
Cs1g15670	-1.2863	5.76498	1.14253e-09	5.07582e-08
Cs8g19380	-1.14401	4.85558	1.1506e-09	5.1006e-08
Cs5g34390	-2.64512	2.54669	1.18066e-09	5.21122e-08
Cs8g01700	-1.60084	3.46644	1.22362e-09	5.38919e-08
Cs8g13660	-1.43165	5.5103	1.23848e-09	5.44294e-08
Cs3g08920	-2.90034	1.49086	1.25446e-09	5.50132e-08
Cs2g15600	-2.1241	2.97845	1.26174e-09	5.52141e-08
Cs2g25050	-7.78795	0.340147	1.27012e-09	5.54618e-08
orange1.1t00072	-3.26057	1.39184	1.30449e-09	5.67205e-08
Cs1g13320	2.76031	1.75869	1.40088e-09	6.0779e-08
Cs1g23770	-2.35448	2.07346	1.40378e-09	6.0779e-08
Cs1g23060	-1.4587	3.63251	1.45906e-09	6.30389e-08
Cs4g04750	-2.85294	1.39206	1.50437e-09	6.4587e-08
Cs6g03520	-1.32644	4.01197	1.57426e-09	6.74459e-08
Cs2g07660	-2.11313	6.86726	1.64827e-09	7.04686e-08
Cs5g04280	-1.39805	4.22581	1.83783e-09	7.8409e-08
Cs9g03570	1.38745	7.81882	1.86396e-09	7.93579e-08
Cs8g20490	-3.40678	1.1623	1.90141e-09	8.07844e-08
Cs8g03940	-2.26752	3.50476	1.97059e-09	8.34611e-08
Cs8g13600	-1.69268	2.85196	1.97258e-09	8.34611e-08
Cs2g02940	-4.78988	0.0928989	2.13254e-09	8.9672e-08
Cs7g31800	-1.15821	6.10732	2.40621e-09	1.00972e-07
Cs6g07200	-1.03144	6.28635	2.48008e-09	1.03858e-07
Cs3g09120	-1.2382	7.64566	2.55989e-09	1.06763e-07
Cs7g06840	-1.07492	4.94935	2.6911e-09	1.11552e-07
Cs1g25280	-1.43769	5.04384	2.71716e-09	1.12369e-07
Cs4g02910	1.20546	5.34257	2.77793e-09	1.14065e-07
Cs7g12400	-2.54381	1.8411	2.77963e-09	1.14065e-07
Cs8g02760	-2.10025	2.1959	2.82933e-09	1.15872e-07
Cs2g03950	1.44289	3.40327	3.13417e-09	1.2759e-07
Cs5g29180	-2.35996	1.92959	3.27635e-09	1.32848e-07
Cs3g25010	-3.76068	1.46955	3.30506e-09	1.33747e-07
Cs1g19840	-1.12706	6.37307	3.52272e-09	1.41993e-07
orange1.1t01372	-3.8218	0.724616	3.55785e-09	1.43126e-07
Cs9g10480	1.64007	3.23323	3.60909e-09	1.44902e-07
Cs5g25920	1.48105	4.65717	3.97095e-09	1.58807e-07
Cs7g01430	-1.05464	4.65533	4.05322e-09	1.61465e-07
Cs2g16940	-1.35973	4.26845	4.25898e-09	1.68675e-07
Cs1g03980	-1.53737	3.4684	4.29899e-09	1.69931e-07
Cs1g16000	-1.09036	7.2018	4.32849e-09	1.70437e-07
Cs6g20170	-1.34662	4.7397	4.4454e-09	1.74704e-07
Cs2g23260	-2.7372	2.64852	4.69539e-09	1.84174e-07
Cs8g16800	-1.0084	5.63492	4.73712e-09	1.85456e-07
Cs2g24030	-2.26898	2.23701	4.87865e-09	1.90631e-07
Cs1g13640	-2.00929	2.31278	5.30189e-09	2.05781e-07
Cs5g28560	-1.92419	3.5002	5.56633e-09	2.15035e-07
Cs9g06660	-2.37795	2.79113	5.6351e-09	2.17281e-07
Cs9g09450	2.59389	1.78678	5.71527e-09	2.19957e-07
Cs7g13940	-1.23861	4.22531	5.76306e-09	2.2138e-07
Cs7g19710	-2.26537	2.93852	5.83754e-09	2.2382e-07
Cs5g25900	1.15729	5.38134	5.85739e-09	2.2416e-07
Cs5g31180	-4.50223	2.13841	5.87391e-09	2.24372e-07
Cs3g14680	1.80327	8.13142	6.05648e-09	2.30915e-07
Cs8g05610	-4.3046	0.724341	6.13798e-09	2.33442e-07
Cs7g10040	1.75975	3.00488	6.14561e-09	2.33442e-07
orange1.1t03893	-6.94242	-0.370664	6.20791e-09	2.35371e-07
Cs2g10160	2.02348	2.6218	6.27275e-09	2.3695e-07
Cs6g07920	1.13722	8.68537	6.66641e-09	2.50265e-07
Cs2g22820	-2.26161	2.324	6.67423e-09	2.50265e-07
orange1.1t03034	1.42031	4.89015	6.78284e-09	2.53872e-07
Cs8g03370	-1.48224	5.18548	6.95817e-09	2.59958e-07
orange1.1t03504	-2.49323	3.69105	7.04239e-09	2.62624e-07
Cs4g07270	-1.40103	4.11842	7.22605e-09	2.68983e-07
orange1.1t00635	1.29872	5.98075	7.70237e-09	2.85673e-07
Cs5g03620	-2.37322	3.25838	8.02142e-09	2.9643e-07
Cs3g27660	4.57648	0.669987	8.34243e-09	3.07736e-07
Cs6g21420	1.3931	4.57336	8.45754e-09	3.1142e-07
Cs2g25470	1.02174	5.25014	8.57476e-09	3.15169e-07
Cs9g14230	-1.40554	4.26138	8.72761e-09	3.19637e-07
Cs9g02090	1.23048	6.88013	8.82532e-09	3.2223e-07
Cs2g09430	-1.0631	4.55828	8.90753e-09	3.24482e-07
Cs2g04590	-7.06151	-0.274619	9.13777e-09	3.31686e-07
Cs4g06040	-7.06161	-0.274593	9.22811e-09	3.34372e-07
Cs4g11370	1.17364	4.66731	9.29889e-09	3.3634e-07
Cs4g12280	-1.88914	2.78087	9.6953e-09	3.50059e-07
orange1.1t01192	2.80972	3.71889	9.80507e-09	3.53397e-07
Cs5g27990	-3.15426	0.736344	1.0035e-08	3.61049e-07
Cs2g18330	-1.21737	4.01342	1.03276e-08	3.70272e-07
Cs1g19860	-2.10477	4.41918	1.03827e-08	3.71597e-07
Cs8g14260	-1.04155	4.51524	1.04971e-08	3.74884e-07
orange1.1t01736	-5.67432	0.857733	1.10233e-08	3.92459e-07
orange1.1t01983	1.32024	5.53304	1.12289e-08	3.99085e-07
Cs6g07800	-7.98157	0.51139	1.13074e-08	4.01177e-07
Cs2g31260	3.78229	1.65915	1.21131e-08	4.28275e-07
Cs1g17220	1.32455	5.68867	1.26366e-08	4.46012e-07
orange1.1t03602	1.02568	6.22078	1.29687e-08	4.56946e-07
Cs8g09070	-1.66051	3.53261	1.30373e-08	4.58572e-07
Cs3g17970	-2.21704	2.19591	1.34863e-08	4.73549e-07
Cs5g04300	-5.3697	-0.0995594	1.43251e-08	5.00423e-07
Cs6g19210	1.0673	7.38177	1.51062e-08	5.2681e-07
Cs5g20610	9.15868	4.18673	1.53195e-08	5.33337e-07
Cs5g27290	-1.1052	4.55319	1.56568e-08	5.43229e-07
Cs1g21130	-1.27518	5.63876	1.58216e-08	5.47089e-07
Cs7g23020	-1.33288	4.03308	1.60662e-08	5.52742e-07
orange1.1t00437	-1.04602	5.83543	1.63776e-08	5.62507e-07
Cs2g13060	-1.3403	3.48766	1.65343e-08	5.66939e-07
Cs6g04310	-6.84593	-0.447209	1.66215e-08	5.68972e-07
Cs6g06690	1.12897	5.12001	1.69201e-08	5.78227e-07
Cs9g06150	-2.02689	2.52757	1.70634e-08	5.8118e-07
Cs7g17670	-1.50013	6.41722	1.74958e-08	5.92943e-07
Cs7g31500	-4.58589	0.969543	1.8252e-08	6.17546e-07
Cs4g12120	-2.15749	3.90679	1.83485e-08	6.19784e-07
Cs1g15920	-1.95907	3.02201	1.83906e-08	6.20181e-07
orange1.1t03462	-4.2498	0.677252	1.84214e-08	6.20197e-07
Cs3g10430	1.13524	5.02439	1.85776e-08	6.24429e-07
Cs4g07340	-3.2091	0.781707	1.88981e-08	6.33116e-07
Cs9g02920	4.23985	2.24147	1.89936e-08	6.35276e-07
Cs2g30400	-2.17924	2.46633	1.95024e-08	6.51228e-07
Cs1g25680	-3.95281	0.836072	2.03393e-08	6.78066e-07
orange1.1t03403	-1.20848	5.50774	2.0503e-08	6.82408e-07
Cs7g03770	-1.22316	5.22709	2.15656e-08	7.16609e-07
Cs1g24810	-2.87206	0.814972	2.18719e-08	7.25608e-07
Cs1g03390	-2.52656	1.899	2.20424e-08	7.28896e-07
Cs2g03240	2.25938	4.84596	2.21293e-08	7.3059e-07
Cs5g18660	-1.73775	4.49003	2.23248e-08	7.35856e-07
Cs7g14940	2.48113	1.61493	2.36801e-08	7.78016e-07
Cs3g16250	-1.37256	4.16208	2.37476e-08	7.78983e-07
Cs1g04870	1.18492	7.48209	2.39089e-08	7.82666e-07
orange1.1t02463	-1.03989	4.80649	2.39365e-08	7.82666e-07
Cs4g16680	-2.37469	3.67984	2.40299e-08	7.84466e-07
Cs1g13710	-1.41929	5.45706	2.43563e-08	7.92587e-07
Cs2g12490	-4.89243	1.47609	2.49888e-08	8.11878e-07
Cs1g21210	2.28166	3.11445	2.70904e-08	8.7598e-07
Cs8g15390	1.50752	2.94794	2.73173e-08	8.81921e-07
Cs2g08310	1.33824	3.55835	2.84812e-08	9.16601e-07
Cs1g15970	1.26284	5.16286	3.05319e-08	9.78036e-07
Cs5g34690	-2.15248	2.36563	3.05337e-08	9.78036e-07
orange1.1t00409	-1.19885	4.73718	3.09733e-08	9.90564e-07
Cs4g09520	1.12655	6.19242	3.10266e-08	9.90718e-07
Cs8g13780	-1.00126	4.54193	3.2387e-08	1.03255e-06
Cs3g25410	-1.31322	4.61756	3.35594e-08	1.06659e-06
Cs7g12690	-2.87261	1.21298	3.45543e-08	1.09651e-06
Cs3g10410	-1.05775	9.23024	3.6914e-08	1.16776e-06
Cs8g05230	-2.68373	1.57712	3.73542e-08	1.17804e-06
Cs1g08030	-3.39066	0.677267	3.83187e-08	1.2066e-06
Cs2g31050	2.77832	1.68307	3.99354e-08	1.25172e-06
orange1.1t05508	-1.01998	4.64608	4.11102e-08	1.28657e-06
Cs2g05170	2.60156	3.24367	4.20513e-08	1.31401e-06
Cs5g03340	-1.45285	3.35861	4.22823e-08	1.3172e-06
Cs3g16510	7.04911	-0.294768	4.25221e-08	1.32064e-06
Cs7g22920	-2.36288	1.498	4.45363e-08	1.379e-06
Cs1g04220	-2.30872	2.11817	4.52631e-08	1.39939e-06
Cs3g22260	-1.56001	3.28734	4.59783e-08	1.41936e-06
Cs6g22210	-1.60724	2.52835	4.64612e-08	1.4321e-06
Cs9g03590	-2.94225	2.47586	4.76302e-08	1.46152e-06
Cs8g10470	4.22234	0.0411716	4.81706e-08	1.47588e-06
Cs6g05580	1.01309	6.22619	5.4026e-08	1.64787e-06
Cs2g01750	-1.42597	3.91288	5.42853e-08	1.65331e-06
Cs9g02520	-7.45907	0.0561083	5.47792e-08	1.66587e-06
Cs3g14590	-1.35163	5.26631	5.58001e-08	1.6944e-06
Cs2g27040	-2.36146	1.72986	5.62691e-08	1.70611e-06
Cs9g17630	1.13324	5.11782	5.71317e-08	1.72969e-06
Cs3g26220	-1.25313	4.35576	6.05501e-08	1.83048e-06
Cs3g17580	1.03712	5.93352	6.13776e-08	1.85275e-06
Cs2g04980	-2.66367	1.23772	6.61615e-08	1.99127e-06
Cs4g12310	-1.14094	4.00036	6.68633e-08	2.00649e-06
Cs2g10720	1.19971	4.88661	6.81637e-08	2.04251e-06
Cs4g11440	1.79513	2.31479	6.84356e-08	2.04766e-06
Cs6g11770	1.1971	5.76492	7.02389e-08	2.08938e-06
Cs2g06290	-1.78371	2.64611	7.04849e-08	2.09365e-06
Cs7g15000	-1.19307	4.27487	7.11514e-08	2.11038e-06
Cs2g25040	-1.51572	3.39763	7.20526e-08	2.12477e-06
orange1.1t00434	1.60113	3.12682	7.36639e-08	2.16293e-06
Cs5g16860	1.48216	6.8159	7.41637e-08	2.17448e-06
Cs5g25590	-7.08496	1.42008	8.40197e-08	2.43205e-06
Cs9g10630	1.36044	5.78689	8.44455e-08	2.44092e-06
Cs4g17540	-1.01019	5.07803	8.46245e-08	2.44264e-06
Cs1g15390	-1.1191	4.96779	8.48961e-08	2.44702e-06
Cs5g06080	1.03409	4.68344	8.55985e-08	2.46379e-06
Cs5g19990	-3.99075	0.457081	8.60762e-08	2.47405e-06
Cs2g01090	-3.77188	0.0191412	8.8008e-08	2.52132e-06
orange1.1t04221	-2.45527	2.3653	8.80908e-08	2.52132e-06
orange1.1t00587	-2.64747	1.16265	8.87966e-08	2.53797e-06
Cs3g07330	-1.43084	7.14884	8.92733e-08	2.54803e-06
Cs5g03440	1.27599	8.52676	8.94162e-08	2.54855e-06
Cs3g23050	3.74078	0.44701	9.11394e-08	2.59044e-06
Cs9g18370	-1.01567	4.50844	9.2737e-08	2.63218e-06
Cs4g11600	1.25199	4.04093	9.35699e-08	2.65214e-06
Cs6g11950	1.31894	5.07124	9.39126e-08	2.65817e-06
Cs1g06790	-1.61141	3.93185	9.62461e-08	2.71669e-06
Cs5g05670	-4.80174	0.888803	9.69199e-08	2.73194e-06
Cs3g18710	2.05926	2.9614	1.05578e-07	2.96374e-06
Cs4g07650	-2.18484	3.56918	1.09673e-07	3.06186e-06
orange1.1t03142	-4.67753	6.91379e-05	1.15576e-07	3.20913e-06
Cs3g03335	-3.51498	1.68785	1.21808e-07	3.37257e-06
Cs4g06670	-1.55692	2.99171	1.22554e-07	3.38449e-06
Cs8g16910	1.1106	4.53031	1.23571e-07	3.40797e-06
Cs7g18060	-3.16703	0.960144	1.45254e-07	3.95789e-06
Cs8g07520	3.59807	0.329548	1.50854e-07	4.0941e-06
orange1.1t00185	-2.27613	1.47066	1.53793e-07	4.15729e-06
Cs2g10040	-2.16399	2.31242	1.53999e-07	4.15737e-06
Cs7g13470	-1.96337	2.65519	1.54723e-07	4.17139e-06
Cs9g01780	-2.11303	2.80242	1.57598e-07	4.23772e-06
Cs1g01330	-4.1098	0.294272	1.59235e-07	4.27052e-06
Cs3g20250	-2.06859	3.0475	1.61663e-07	4.32428e-06
Cs2g30870	-1.91486	2.57035	1.63339e-07	4.36338e-06
Cs2g16900	1.05716	5.84386	1.63776e-07	4.36935e-06
Cs1g01850	-5.15226	-0.274559	1.70773e-07	4.55007e-06
Cs9g19160	-1.22929	5.15187	1.71201e-07	4.55554e-06
Cs2g18250	1.02742	5.21531	1.72923e-07	4.59538e-06
Cs4g06180	-1.63874	2.80062	1.74577e-07	4.63332e-06
Cs4g03740	2.22676	1.5304	1.81425e-07	4.80883e-06
Cs5g32740	2.13992	6.82879	1.82423e-07	4.82902e-06
Cs5g32090	1.67278	2.7499	1.94273e-07	5.1228e-06
Cs7g04110	-3.85024	0.340545	1.94826e-07	5.12714e-06
Cs5g08360	1.51955	3.27993	2.02736e-07	5.32533e-06
Cs6g13230	-4.19336	0.0378313	2.06378e-07	5.40711e-06
Cs4g09080	1.1247	4.51364	2.11665e-07	5.53852e-06
Cs2g05090	-1.24625	6.64333	2.12658e-07	5.55739e-06
Cs7g19240	-1.13601	3.94142	2.14833e-07	5.60706e-06
Cs2g24640	-1.94249	2.69708	2.15894e-07	5.62756e-06
Cs6g21840	3.01998	0.717322	2.16594e-07	5.63714e-06
Cs4g20170	-2.41485	1.15435	2.18775e-07	5.68014e-06
Cs3g04110	-1.09983	4.1883	2.19023e-07	5.68014e-06
orange1.1t04969	2.9045	3.07148	2.24723e-07	5.8132e-06
Cs5g28520	-2.34393	1.52501	2.27348e-07	5.86628e-06
Cs7g10740	-1.93052	3.31193	2.3311e-07	5.98472e-06
Cs9g07140	-1.57985	4.93003	2.33967e-07	5.99917e-06
Cs6g12920	-1.81613	3.51913	2.36947e-07	6.06798e-06
Cs5g26910	-4.93199	-0.447124	2.4022e-07	6.1441e-06
Cs2g17200	-1.65422	2.72975	2.60879e-07	6.631e-06
Cs4g06410	3.33071	0.461487	2.67948e-07	6.78536e-06
orange1.1t04132	1.07595	4.39534	2.74344e-07	6.93016e-06
Cs1g15190	-1.1426	3.86713	2.81425e-07	7.10026e-06
Cs6g21160	-1.37434	3.04861	2.86222e-07	7.20348e-06
Cs7g08380	-1.26458	3.59018	2.90657e-07	7.29712e-06
Cs7g29810	-1.02104	4.78082	2.94291e-07	7.37702e-06
orange1.1t05692	1.24045	3.55689	2.94561e-07	7.37702e-06
Cs8g01670	-1.03965	5.14179	2.97258e-07	7.43546e-06
Cs4g02970	1.25368	4.04239	2.99058e-07	7.46269e-06
Cs5g08720	-3.04813	0.400307	2.99077e-07	7.46269e-06
Cs9g17480	-1.5006	3.37134	3.02217e-07	7.53184e-06
Cs5g23210	-2.69576	1.1365	3.05972e-07	7.61614e-06
Cs1g12520	-1.05539	4.38879	3.10006e-07	7.69778e-06
Cs7g10510	4.12011	1.4206	3.14574e-07	7.78284e-06
Cs5g12420	-3.85055	0.340491	3.23742e-07	7.99032e-06
Cs6g18060	-2.13182	2.87478	3.48524e-07	8.57093e-06
Cs7g08390	-1.09011	4.48436	3.49927e-07	8.59508e-06
Cs7g28700	1.58591	2.68573	3.58439e-07	8.77252e-06
Cs6g10280	-1.01887	5.63703	3.64101e-07	8.8954e-06
Cs7g02670	-1.26891	5.68726	3.69962e-07	9.01137e-06
Cs3g23110	1.61522	9.18424	3.70613e-07	9.01648e-06
Cs3g04610	-1.69363	2.07416	3.7352e-07	9.06563e-06
Cs5g26290	-2.37805	2.60796	3.769e-07	9.12599e-06
orange1.1t04029	-1.15171	3.91092	3.82585e-07	9.24174e-06
Cs1g23170	1.8061	4.5736	3.92707e-07	9.46073e-06
orange1.1t00304	-1.47556	3.58494	4.09043e-07	9.83435e-06
Cs4g01020	-4.14846	0.325148	4.12031e-07	9.89456e-06
Cs6g08260	-2.29539	3.34733	4.27534e-07	1.02548e-05
Cs1g15990	-2.34431	1.78665	4.35505e-07	1.04093e-05
Cs7g09380	-1.82597	1.94032	4.44074e-07	1.05894e-05
Cs7g02820	1.25508	6.18295	4.51873e-07	1.07503e-05
Cs7g12610	-2.41675	5.21406	4.5251e-07	1.07529e-05
Cs7g10950	-1.13092	4.56045	4.69056e-07	1.11073e-05
Cs8g08710	-1.90187	2.86747	4.72436e-07	1.11691e-05
orange1.1t00235	-1.7062	2.47377	4.72766e-07	1.11691e-05
Cs3g24220	-1.2037	4.21502	4.73305e-07	1.11691e-05
Cs6g15880	1.16392	4.89755	4.73935e-07	1.11711e-05
Cs5g02770	-1.23526	3.89697	4.77891e-07	1.12514e-05
Cs7g32200	-1.55039	2.94721	4.79199e-07	1.12692e-05
Cs2g06840	1.39822	5.15344	5.18218e-07	1.21448e-05
Cs5g31970	-1.86076	2.1795	5.19465e-07	1.21499e-05
Cs9g19120	-4.35725	0.770382	5.20061e-07	1.21499e-05
Cs9g15690	-1.30431	3.15831	5.20218e-07	1.21499e-05
Cs6g20270	-1.15167	4.74426	5.2894e-07	1.23395e-05
Cs5g30185	4.8419	0.114926	5.58223e-07	1.29635e-05
Cs5g03240	-1.15733	4.27987	5.65863e-07	1.3126e-05
Cs3g02125	-1.82586	2.66463	5.86218e-07	1.35827e-05
Cs7g05360	1.50126	5.39874	6.00781e-07	1.38729e-05
Cs3g26900	-2.54337	1.87804	6.05707e-07	1.39552e-05
Cs3g03670	-2.41025	2.19975	6.10394e-07	1.40473e-05
orange1.1t02791	-1.81254	2.44578	6.13462e-07	1.4102e-05
Cs4g04310	-2.21484	1.90416	6.14942e-07	1.41202e-05
Cs5g25860	-1.68777	4.37919	6.19945e-07	1.42191e-05
Cs7g06140	-1.17796	3.72016	6.27014e-07	1.4349e-05
orange1.1t00590	-3.54868	0.310151	6.32988e-07	1.44533e-05
Cs3g26790	-1.87395	3.82847	6.36134e-07	1.4509e-05
Cs3g17310	-1.17818	3.84835	6.39511e-07	1.45697e-05
Cs1g03040	-1.20572	3.68012	6.42312e-07	1.46173e-05
Cs2g05030	-7.0033	-0.321807	6.48011e-07	1.47305e-05
Cs7g04390	1.10359	7.193	6.65319e-07	1.50737e-05
Cs7g26930	1.06088	4.36509	6.73976e-07	1.5236e-05
Cs6g14840	-2.00936	1.95967	6.93733e-07	1.56308e-05
Cs5g02420	-2.77476	3.05364	7.03846e-07	1.58238e-05
Cs7g10990	-1.21398	3.86422	7.04824e-07	1.58283e-05
Cs7g14430	-1.31471	4.7042	7.21373e-07	1.61645e-05
Cs1g09575	-2.97657	0.899806	7.24583e-07	1.62186e-05
Cs6g10120	-3.1024	4.38621	7.4736e-07	1.67101e-05
orange1.1t00339	-1.80042	2.11441	7.78471e-07	1.73677e-05
Cs5g28680	-3.23914	0.246671	8.20026e-07	1.82749e-05
Cs3g12580	-1.28789	3.42664	8.25945e-07	1.83867e-05
Cs4g08090	-1.35965	3.89406	8.41248e-07	1.86569e-05
Cs6g18680	-1.81884	5.02477	8.41549e-07	1.86569e-05
Cs3g18660	-2.72476	1.65819	8.61934e-07	1.90427e-05
Cs1g18460	1.08885	6.57632	8.65495e-07	1.91007e-05
Cs7g08110	-3.25847	1.03711	8.76585e-07	1.93081e-05
Cs3g26020	-2.78788	0.653431	8.76784e-07	1.93081e-05
Cs1g24030	-1.19211	4.80386	8.95885e-07	1.97076e-05
Cs9g02790	-2.16556	3.72434	9.07152e-07	1.99339e-05
Cs7g18940	1.61428	3.68274	9.20314e-07	2.02014e-05
Cs5g08860	-2.15223	1.9937	9.32922e-07	2.03906e-05
Cs9g10530	-1.3619	4.9817	9.40178e-07	2.05053e-05
Cs5g26010	-1.45041	2.48119	9.75615e-07	2.12103e-05
Cs2g13040	-3.10074	1.33204	1.01804e-06	2.2109e-05
Cs8g10910	-1.71273	2.79768	1.0619e-06	2.28672e-05
Cs3g09900	-1.342	3.00866	1.08294e-06	2.32714e-05
Cs4g09530	1.33109	3.48309	1.08893e-06	2.33753e-05
orange1.1t03183	-1.51466	2.81998	1.13325e-06	2.43013e-05
Cs3g10720	2.57206	2.05184	1.15377e-06	2.46375e-05
Cs1g22630	-1.54634	3.56727	1.19285e-06	2.53798e-05
orange1.1t02024	-1.85641	2.60252	1.19553e-06	2.53969e-05
Cs7g08180	-1.67673	2.40666	1.19871e-06	2.54381e-05
Cs4g16770	-1.46043	6.0788	1.20616e-06	2.55697e-05
Cs3g19840	-1.20514	3.6077	1.27971e-06	2.69611e-05
Cs5g22800	-1.2437	3.19664	1.48645e-06	3.09655e-05
Cs2g02550	-2.95938	0.578032	1.51166e-06	3.14265e-05
Cs6g14340	-2.53822	1.13661	1.556e-06	3.23155e-05
Cs2g10530	-1.58778	3.53916	1.63047e-06	3.37652e-05
Cs8g03710	-1.32844	3.08986	1.63076e-06	3.37652e-05
orange1.1t02980	2.6959	2.01959	1.64226e-06	3.39689e-05
Cs9g14960	-6.66893	-0.584636	1.68314e-06	3.47792e-05
Cs1g24170	-1.51789	3.36948	1.69199e-06	3.49268e-05
Cs4g15770	-1.2682	3.6572	1.71485e-06	3.53272e-05
Cs2g26760	-1.31339	3.16461	1.79103e-06	3.67108e-05
orange1.1t00510	-1.31549	3.1123	1.80699e-06	3.69277e-05
Cs7g12850	1.33548	3.06983	1.82304e-06	3.72183e-05
Cs6g06670	-2.71037	0.858214	1.89202e-06	3.84729e-05
orange1.1t02445	-2.16028	2.17494	1.91974e-06	3.89978e-05
Cs4g05660	5.80125	2.84962	1.97573e-06	4.00556e-05
orange1.1t00600	-1.09944	3.55199	2.07528e-06	4.18662e-05
Cs4g04150	-1.36692	2.72454	2.29947e-06	4.61612e-05
Cs8g01970	-1.6778	2.10117	2.30587e-06	4.6244e-05
Cs5g25320	-1.09058	3.75754	2.35722e-06	4.71726e-05
Cs5g14110	-1.42941	2.54181	2.38461e-06	4.76363e-05
Cs7g27685	1.7659	4.00006	2.47246e-06	4.92434e-05
orange1.1t03628	1.84774	1.68798	2.49733e-06	4.95971e-05
Cs3g23450	-1.50523	2.58386	2.54492e-06	5.04932e-05
Cs4g15980	-1.17186	3.27631	2.55912e-06	5.07257e-05
orange1.1t02947	3.37218	2.14417	2.57788e-06	5.1048e-05
Cs8g02230	2.8177	0.447075	2.67826e-06	5.28532e-05
Cs5g24590	-1.42563	3.25168	2.67938e-06	5.28532e-05
Cs9g14380	-3.64637	3.77365	2.69532e-06	5.31162e-05
Cs5g11770	-2.71468	0.940346	2.84077e-06	5.58346e-05
orange1.1t02850	-1.54446	2.59989	2.84146e-06	5.58346e-05
Cs9g03160	-4.16918	0.0188889	2.8472e-06	5.58401e-05
Cs8g17960	1.27264	3.21416	2.86772e-06	5.61886e-05
Cs1g05030	-1.19204	4.21993	2.87768e-06	5.63297e-05
Cs3g25140	4.39091	-0.248669	2.88136e-06	5.63478e-05
orange1.1t05409	-1.6363	3.30486	2.98527e-06	5.79458e-05
Cs9g12710	1.90997	1.62083	2.98961e-06	5.79655e-05
Cs3g06370	-4.95452	0.230389	3.01094e-06	5.83238e-05
Cs4g15830	-1.05061	5.11454	3.02177e-06	5.84781e-05
Cs4g02810	1.56124	4.31785	3.03231e-06	5.85751e-05
Cs1g08890	-2.64671	1.80831	3.03251e-06	5.85751e-05
orange1.1t01623	-4.33375	-0.274358	3.13141e-06	6.04283e-05
Cs7g03580	-2.6621	0.736392	3.29093e-06	6.33271e-05
Cs4g01990	-4.87441	0.162891	3.35524e-06	6.45039e-05
Cs2g21840	-2.71601	0.940179	3.39362e-06	6.49987e-05
orange1.1t01118	-2.0869	1.58387	3.44839e-06	6.59226e-05
Cs7g05210	-1.1114	3.58588	3.49069e-06	6.65445e-05
Cs9g17670	2.31107	2.32322	3.52309e-06	6.70996e-05
Cs6g12060	-2.48614	0.759655	3.53543e-06	6.72719e-05
Cs8g20240	-1.4687	3.99129	3.57912e-06	6.804e-05
Cs5g01570	1.60135	2.93816	3.58748e-06	6.80723e-05
Cs4g20550	-1.13018	5.78053	3.59133e-06	6.8082e-05
Cs3g03090	-2.441	1.1191	3.60444e-06	6.82673e-05
Cs5g23250	1.08519	3.55647	3.64295e-06	6.89327e-05
Cs4g05160	-2.24205	1.07435	3.71381e-06	7.02085e-05
Cs5g02310	1.96555	2.44511	3.72016e-06	7.02636e-05
Cs3g26470	-1.94583	2.6851	3.72954e-06	7.03479e-05
Cs8g17950	-2.92187	0.759169	3.73151e-06	7.03479e-05
Cs6g11010	-6.33187	-0.835905	3.79137e-06	7.14106e-05
Cs7g18040	1.3006	3.0771	3.80245e-06	7.15533e-05
Cs8g09390	1.62039	2.74666	3.82221e-06	7.1797e-05
Cs5g34450	-1.56723	3.40611	3.84197e-06	7.20979e-05
Cs7g30970	1.54409	2.43743	3.88765e-06	7.2888e-05
Cs9g06870	1.5108	6.60697	3.92282e-06	7.34801e-05
Cs7g12120	-2.77157	0.538985	4.06299e-06	7.5897e-05
Cs7g23240	1.28757	4.0424	4.08227e-06	7.6118e-05
Cs7g05140	-1.13544	4.37918	4.15742e-06	7.74486e-05
Cs7g16240	-1.23977	3.75712	4.16263e-06	7.7475e-05
orange1.1t03773	-1.48028	4.49554	4.20465e-06	7.81859e-05
Cs9g15750	-7.29804	-0.0794292	4.29899e-06	7.97949e-05
Cs2g13610	1.39959	3.68013	4.50929e-06	8.34708e-05
Cs7g22930	-3.22855	0.67755	4.54359e-06	8.40298e-05
Cs9g04190	-1.15347	4.00494	4.59088e-06	8.48275e-05
Cs3g23740	-1.05672	3.59394	4.59778e-06	8.48782e-05
Cs1g19160	-3.17421	0.355871	4.68953e-06	8.6494e-05
Cs4g20590	-1.09436	7.09481	4.82668e-06	8.87032e-05
Cs4g10160	2.29146	2.00426	4.87648e-06	8.94575e-05
Cs5g19020	1.38043	5.02104	4.94165e-06	9.05718e-05
Cs8g14280	1.37215	5.65947	4.98548e-06	9.12932e-05
Cs1g22340	2.35433	1.87371	5.07147e-06	9.27018e-05
Cs1g09580	-1.49854	2.52852	5.24969e-06	9.56173e-05
Cs2g06470	-2.25515	1.96488	5.26106e-06	9.57391e-05
Cs5g23950	2.0136	1.47526	5.27793e-06	9.59606e-05
Cs2g05560	-1.216	6.69568	5.36988e-06	9.7459e-05
Cs9g01710	-2.02933	2.83517	5.60561e-06	0.000101467
Cs3g27050	-3.8423	0.0747507	5.75261e-06	0.000103852
Cs1g21585	-1.14027	3.5102	5.77496e-06	0.000104163
Cs7g28520	-1.58842	2.52814	5.8592e-06	0.000105358
Cs8g18310	-3.09149	0.564951	5.87584e-06	0.000105517
Cs8g19720	1.42181	2.91489	6.13961e-06	0.000110061
Cs5g11310	1.21152	3.65787	6.15492e-06	0.000110238
Cs7g22000	1.03662	6.27496	6.25176e-06	0.000111875
orange1.1t04730	-1.45973	3.64497	6.30723e-06	0.000112769
Cs5g10830	-2.58965	1.2935	6.34023e-06	0.000113161
Cs8g04300	-3.25169	0.0750205	6.3994e-06	0.000114117
Cs6g04580	-1.10145	3.83514	6.47099e-06	0.000115293
Cs8g05250	-1.34998	2.85265	6.59747e-06	0.000117444
Cs3g22870	-1.04146	3.8776	6.7128e-06	0.000119393
Cs7g29730	2.05849	5.8601	6.77036e-06	0.000120215
Cs1g07650	-1.13867	3.42496	6.77663e-06	0.000120215
Cs4g19900	-1.30424	2.89453	7.06205e-06	0.000124629
Cs3g13440	-1.46313	3.0784	7.14252e-06	0.00012594
Cs8g02870	-2.4314	1.22133	7.18056e-06	0.000126502
Cs1g12580	-1.05905	4.6725	7.22729e-06	0.000127215
Cs9g15290	1.03903	4.34794	7.28235e-06	0.000128074
orange1.1t03042	2.07756	5.02214	7.34955e-06	0.000129145
Cs1g15940	-3.42133	-0.251221	7.40816e-06	0.000129951
Cs5g10870	-1.71087	2.73568	7.42388e-06	0.000130096
orange1.1t04786	-1.16356	3.47077	7.50051e-06	0.000131122
Cs5g22950	1.02449	4.2364	7.50208e-06	0.000131122
Cs4g04730	-1.65704	2.87039	7.67756e-06	0.000133834
Cs4g02530	2.07558	2.2025	7.68221e-06	0.000133834
Cs1g22750	1.44319	2.18877	7.7768e-06	0.000135142
orange1.1t03827	-1.42385	3.74143	7.79428e-06	0.00013533
Cs2g01210	-1.44884	3.88718	7.90822e-06	0.00013696
Cs5g07780	-1.01881	3.73206	8.01121e-06	0.000138509
Cs9g18130	-3.17928	0.0192785	8.46517e-06	0.000145618
Cs5g15000	-1.80433	2.43866	8.52843e-06	0.000146583
orange1.1t05115	-2.85214	0.246921	8.76084e-06	0.000150073
Cs3g23360	-2.73352	0.792836	8.8095e-06	0.000150669
Cs1g10500	-1.17291	4.36894	8.85764e-06	0.00015135
Cs9g07670	3.02921	7.57848	8.89729e-06	0.000151901
Cs5g03980	-2.56205	1.21336	8.92517e-06	0.000152249
Cs3g17390	1.29429	5.27174	8.93879e-06	0.000152354
orange1.1t02123	-1.90941	1.27065	8.99969e-06	0.000153265
Cs4g17810	-1.33038	3.16886	9.04105e-06	0.000153841
Cs4g19640	-2.94535	1.12766	9.13758e-06	0.000155354
Cs7g02970	6.14406	-0.978323	9.17776e-06	0.000155811
Cs2g29700	-1.45909	2.29408	9.17968e-06	0.000155811
Cs6g11170	-1.11168	4.05205	9.38005e-06	0.000158816
Cs6g03220	-6.46804	-0.736399	9.82397e-06	0.000165646
Cs5g13890	-4.03705	-0.500444	9.97523e-06	0.000168058
Cs1g25250	-1.95984	1.64696	1.00548e-05	0.000169258
Cs2g28500	-1.17296	3.33443	1.01114e-05	0.000170072
orange1.1t00055	-4.03643	-0.500445	1.01526e-05	0.000170623
Cs2g22260	-3.45179	-0.228605	1.0201e-05	0.000171296
Cs7g04900	-1.60489	2.22541	1.02289e-05	0.000171624
orange1.1t03589	-1.12989	5.2916	1.03479e-05	0.000173336
Cs5g25890	-3.59347	-0.120054	1.03816e-05	0.000173758
Cs7g15080	-6.42405	-0.768811	1.05397e-05	0.000175844
Cs1g19190	-1.77156	2.09196	1.05407e-05	0.000175844
Cs3g08810	-2.02197	1.00926	1.05997e-05	0.000176684
orange1.1t02265	-1.6894	3.0008	1.06896e-05	0.000178039
Cs6g14270	-2.8342	0.0932192	1.09153e-05	0.000181353
orange1.1t00571	1.52435	3.89989	1.12742e-05	0.000186709
Cs8g08430	-1.85894	2.38048	1.13727e-05	0.000188189
Cs5g17260	-2.01685	1.56473	1.14242e-05	0.00018887
Cs2g12530	-1.15377	4.47192	1.15193e-05	0.000190152
Cs8g17520	1.27037	7.06325	1.1534e-05	0.000190242
Cs1g05090	-2.04041	1.64651	1.18385e-05	0.000194793
Cs8g03230	-1.63312	2.91695	1.18814e-05	0.00019514
Cs6g18920	-1.76445	2.08753	1.18883e-05	0.00019514
orange1.1t01564	-1.06339	3.79699	1.21705e-05	0.000199611
Cs8g03110	-1.83855	1.99399	1.2536e-05	0.000204949
Cs5g25760	1.72718	1.72912	1.25768e-05	0.000205451
Cs5g28460	-1.99487	1.12819	1.2674e-05	0.000206874
Cs2g06180	-2.05715	1.08352	1.27263e-05	0.000207562
Cs5g05820	-3.15397	5.03888e-05	1.27552e-05	0.000207867
orange1.1t03535	-2.28103	0.603947	1.2888e-05	0.000209642
Cs4g05030	1.11092	5.17485	1.29107e-05	0.000209733
Cs2g13300	-2.17701	0.970515	1.33432e-05	0.0002159
Cs7g10810	-1.02567	4.05226	1.33706e-05	0.000216172
orange1.1t00542	-1.72207	3.47035	1.34098e-05	0.000216586
Cs1g22410	-1.59705	2.8143	1.34174e-05	0.000216586
Cs7g18240	-3.12094	1.01826	1.35339e-05	0.000217813
Cs7g04740	-1.28615	2.88163	1.3536e-05	0.000217813
Cs3g18750	-3.88232	-0.613475	1.37816e-05	0.000221241
Cs2g20750	-1.57675	2.06509	1.40137e-05	0.000224087
Cs3g12630	-2.74668	0.803902	1.40923e-05	0.000224993
Cs6g02200	-1.24815	3.17122	1.42952e-05	0.000227875
Cs9g04030	1.12167	3.36203	1.43215e-05	0.000228117
Cs7g03530	-1.1258	3.17144	1.48325e-05	0.000235888
Cs1g20870	-1.057	4.59096	1.48517e-05	0.000236011
Cs7g26580	-3.96814	-0.141259	1.49365e-05	0.000237089
Cs4g13010	-6.37816	-0.802062	1.49428e-05	0.000237089
Cs4g11180	3.00579	0.904129	1.51452e-05	0.000239556
orange1.1t05133	-2.45855	1.07419	1.63292e-05	0.000256892
Cs9g17050	1.68642	3.29193	1.66893e-05	0.000262356
Cs3g16525	-1.34078	2.49167	1.71396e-05	0.000268608
Cs1g19850	-1.68166	1.58448	1.72173e-05	0.000269619
Cs2g05530	-1.0771	4.83535	1.74626e-05	0.000273251
Cs7g31060	1.2415	3.51366	1.75618e-05	0.000274594
Cs4g12290	-2.21573	1.7183	1.80382e-05	0.000281826
Cs3g16520	-1.33366	3.22326	1.80728e-05	0.000282151
Cs2g28260	-1.25655	3.44059	1.83154e-05	0.000285353
Cs4g15330	-1.23143	4.37551	1.83198e-05	0.000285353
Cs9g14140	1.96824	2.07515	1.85727e-05	0.000288852
Cs1g20150	1.2636	5.54882	1.88247e-05	0.000292548
Cs7g03460	-1.69193	2.22122	1.89767e-05	0.000294687
Cs8g02560	-2.31019	2.11824	1.9433e-05	0.000301255
Cs2g15260	-1.67778	3.14665	1.94735e-05	0.000301485
Cs8g19620	-3.44992	0.0190176	1.95319e-05	0.00030216
Cs8g09730	1.28622	5.46271	1.97727e-05	0.000305424
Cs5g09980	-2.37493	2.71713	1.98481e-05	0.000306014
Cs3g06740	-1.7892	2.79485	1.98548e-05	0.000306014
orange1.1t04818	-1.31247	2.66533	1.9887e-05	0.000306262
orange1.1t01595	5.41387	1.42097	2.0235e-05	0.000310452
Cs9g09570	-1.16965	3.54687	2.03946e-05	0.000312666
Cs5g03170	1.78005	2.11973	2.06385e-05	0.000315931
orange1.1t01769	1.02861	6.03323	2.06678e-05	0.000316144
Cs9g09170	-3.88715	0.1109	2.07459e-05	0.0003171
Cs5g12260	-1.21155	2.75658	2.07794e-05	0.000317129
Cs7g08190	-1.10563	3.31351	2.07943e-05	0.000317129
Cs2g21820	-3.17226	0.3559	2.09878e-05	0.000319602
Cs1g03290	-2.02684	2.34695	2.13243e-05	0.000324003
Cs3g19580	-1.55174	2.0832	2.18657e-05	0.000331244
Cs8g15290	-2.45742	1.29418	2.21266e-05	0.0003347
Cs2g10525	-2.16466	0.725314	2.23828e-05	0.000337825
Cs5g06140	-2.66184	2.11339	2.25315e-05	0.000339818
Cs7g28690	1.91896	1.25869	2.26995e-05	0.000341936
Cs1g25480	-1.07311	4.47512	2.2766e-05	0.000342596
Cs7g11770	-2.0237	0.960655	2.34979e-05	0.000352573
orange1.1t03313	-2.16019	1.64069	2.39678e-05	0.000359002
Cs4g06340	1.34243	3.02601	2.40537e-05	0.000359855
Cs6g17530	-1.10882	3.53193	2.4223e-05	0.000361857
Cs6g13840	-6.01444	-1.05811	2.46854e-05	0.000368496
orange1.1t02260	2.08095	1.45492	2.48576e-05	0.000370796
Cs2g28430	-1.8591	1.15461	2.48788e-05	0.000370841
Cs4g07380	-2.18621	0.804355	2.50759e-05	0.000373507
Cs9g17780	-6.23357	-0.906237	2.52938e-05	0.000376478
Cs6g22010	-1.02198	3.52038	2.55512e-05	0.000379756
Cs3g06580	1.11693	3.63794	2.56055e-05	0.000380011
Cs7g26790	-3.17231	0.355925	2.62038e-05	0.000388044
Cs7g30680	-1.13715	3.21355	2.64827e-05	0.00039189
orange1.1t02482	1.33913	2.92014	2.65769e-05	0.000393
orange1.1t03668	1.00795	4.44583	2.68445e-05	0.000396383
Cs4g20580	-1.23039	6.30372	2.73492e-05	0.000402672
orange1.1t00612	-3.62027	-0.0995784	2.75273e-05	0.000405002
Cs2g17170	-2.75423	0.526009	2.81288e-05	0.000412664
orange1.1t00271	-1.92233	1.70693	2.81687e-05	0.000412953
Cs5g15450	-1.12753	3.9638	2.89255e-05	0.000421628
orange1.1t01599	-1.57644	2.18816	2.99284e-05	0.000435004
orange1.1t02428	-4.99761	-0.3958	3.01948e-05	0.00043831
Cs4g20530	-1.28809	4.4617	3.01987e-05	0.00043831
Cs2g08030	-1.77552	1.65299	3.06087e-05	0.000443852
Cs5g27620	-1.04202	4.169	3.06239e-05	0.000443852
Cs3g18330	1.09661	3.60964	3.06603e-05	0.000444063
Cs4g01240	-2.55163	0.263073	3.07945e-05	0.000445691
Cs5g18370	-2.3519	0.499059	3.09026e-05	0.000446624
orange1.1t05258	3.38984	-0.294967	3.2266e-05	0.000463705
Cs2g08020	2.34409	1.07927	3.49738e-05	0.000498511
orange1.1t04495	-1.7805	1.13723	3.49807e-05	0.000498511
Cs2g10290	-1.23729	3.11908	3.54477e-05	0.000504463
Cs2g08390	-1.27236	2.81756	3.61425e-05	0.000513279
Cs5g27370	-1.53251	2.05144	3.62081e-05	0.000513853
Cs3g05040	4.3287	-0.90435	3.81892e-05	0.000540468
Cs8g12020	-1.38282	2.1326	3.86941e-05	0.000546477
Cs5g32300	2.16776	1.28301	3.94929e-05	0.000556605
orange1.1t01397	-2.18784	2.54746	3.99679e-05	0.000562523
Cs5g07160	1.7209	1.2587	4.0073e-05	0.000563614
Cs2g06570	-1.32298	2.46751	4.02565e-05	0.000565417
Cs3g27870	-1.002	4.26523	4.03121e-05	0.00056581
Cs7g15810	-4.5445	-0.736311	4.1391e-05	0.000580155
Cs2g09520	-2.11929	1.60926	4.16776e-05	0.000583372
Cs8g18760	-2.2537	1.60914	4.25189e-05	0.000593117
Cs5g25690	-1.99398	5.57074	4.31852e-05	0.000602001
Cs7g01180	-1.18306	3.50676	4.3604e-05	0.000607011
Cs7g16220	-6.07242	-1.01861	4.44037e-05	0.000617302
Cs7g29570	-2.05295	2.94694	4.49994e-05	0.000625159
Cs1g01610	-2.83984	-0.0586852	4.52308e-05	0.000627519
Cs6g15380	3.91046	-0.611517	4.59613e-05	0.000636789
Cs4g17300	-1.11629	4.19976	4.60796e-05	0.000637997
orange1.1t04637	-1.71204	1.6593	4.6169e-05	0.000638802
Cs2g29630	-1.23583	2.94307	4.6546e-05	0.000643582
Cs7g06030	-1.26234	6.67007	4.6746e-05	0.000644894
Cs9g10730	-2.43935	0.180741	4.67671e-05	0.000644894
Cs7g06330	-1.47934	4.47097	4.81832e-05	0.000661298
Cs7g08330	-2.81306	-0.0788191	4.92509e-05	0.000673688
Cs2g04680	-2.27672	1.04676	4.93931e-05	0.000675182
Cs8g07010	-1.07838	3.11941	4.96893e-05	0.000678265
Cs6g07410	4.32841	-0.904403	4.9778e-05	0.000678628
Cs3g24530	-2.28461	0.748156	5.0365e-05	0.000685259
Cs3g12080	-1.49666	2.19664	5.04348e-05	0.000685752
Cs1g10460	-3.6199	-0.0995018	5.108e-05	0.000692681
orange1.1t06019	1.15939	7.30834	5.12725e-05	0.000694831
Cs7g14960	-2.07833	0.950693	5.24583e-05	0.00070902
Cs2g12730	-6.63008	-0.613883	5.28874e-05	0.000714347
Cs6g15140	1.33136	2.25892	5.3706e-05	0.000723969
Cs5g10850	-4.27246	-0.321679	5.39062e-05	0.000726188
Cs7g23170	1.50225	1.77494	5.43711e-05	0.000731486
Cs1g09650	-1.37234	2.21769	5.46637e-05	0.000734939
Cs7g32270	-2.25608	1.13672	5.53926e-05	0.000744097
Cs5g05260	1.02001	4.79563	5.66328e-05	0.000757923
Cs4g08740	-2.17367	0.665955	5.69773e-05	0.000762034
Cs6g15930	-2.6423	0.538996	5.7995e-05	0.000773329
Cs5g18620	-2.26818	1.75826	5.8133e-05	0.00077445
orange1.1t03294	-1.91655	1.19688	5.85249e-05	0.000778655
Cs5g08340	1.03916	4.46605	5.90852e-05	0.000784577
Cs5g01400	4.43085	-0.833855	5.95028e-05	0.000789609
Cs2g29810	3.69862	-0.367898	6.05192e-05	0.000802056
Cs6g02320	1.01181	3.47194	6.08948e-05	0.000806298
Cs5g32150	-1.9913	1.54494	6.19235e-05	0.000818014
Cs7g24920	1.7128	3.58339	6.24436e-05	0.000823289
Cs2g01800	-3.49197	-0.500476	6.25587e-05	0.000823607
Cs4g16130	-2.80584	0.340987	6.25886e-05	0.000823607
Cs2g08110	-1.01114	4.84256	6.28173e-05	0.000826084
Cs8g02380	-1.90335	1.77593	6.29348e-05	0.000827097
Cs6g12450	-3.17941	0.0191727	6.45034e-05	0.000846079
Cs3g26050	-1.01203	3.33484	6.45474e-05	0.000846114
Cs9g18390	-4.75138	-0.584526	6.46292e-05	0.000846642
orange1.1t02782	-1.33077	3.33419	6.47028e-05	0.000846895
Cs6g17590	1.92644	4.20166	6.52841e-05	0.000853581
Cs9g04040	-1.67725	1.52551	6.53991e-05	0.000854537
Cs3g17760	-2.15639	0.900192	6.58082e-05	0.000858784
Cs9g16350	-3.01834	0.074886	6.63403e-05	0.000862973
Cs2g19970	1.90519	2.63688	6.69502e-05	0.000868695
Cs7g29660	1.00786	3.93662	6.86927e-05	0.000889046
Cs1g15120	-1.03904	3.17363	6.91743e-05	0.000894712
Cs2g16070	-1.44431	1.9703	6.99323e-05	0.000902803
orange1.1t01660	1.98647	3.19077	7.02426e-05	0.000905612
Cs6g06660	-1.49112	2.64652	7.02829e-05	0.000905612
Cs3g12830	1.3235	2.34845	7.14693e-05	0.000919161
Cs5g01990	1.5261	3.16612	7.21545e-05	0.000926225
Cs6g05210	-3.7977	-0.673647	7.32941e-05	0.000939084
Cs5g08450	-1.98245	1.02813	7.42415e-05	0.000948843
Cs7g17090	3.12405	-0.248635	7.4844e-05	0.00095574
Cs7g27080	-1.38752	2.41066	7.48747e-05	0.00095574
Cs6g20290	-4.49858	-0.768716	7.51922e-05	0.000959194
Cs6g07770	-1.25607	2.39639	7.58188e-05	0.000966501
Cs8g02370	-1.35098	2.11057	7.58596e-05	0.000966501
Cs2g19630	-1.25161	2.41812	7.60347e-05	0.000968128
Cs9g17460	2.38112	0.582233	7.7124e-05	0.000979557
Cs5g15530	-1.57978	3.91742	7.76161e-05	0.000985194
orange1.1t01487	1.11334	4.28128	7.99322e-05	0.00101145
Cs1g21870	-3.7543	-0.704682	8.05883e-05	0.00101912
Cs5g28620	-1.72559	1.53245	8.0942e-05	0.00102201
Cs1g14920	2.09092	2.19343	8.09668e-05	0.00102201
Cs7g26290	1.0378	3.13006	8.30655e-05	0.00104335
orange1.1t02739	-1.71473	1.23852	8.57007e-05	0.00107118
Cs8g20410	-2.27004	2.13982	8.73282e-05	0.00108952
Cs4g18320	1.85372	1.92019	8.83825e-05	0.00109947
Cs6g10900	1.47188	2.47952	8.83944e-05	0.00109947
Cs3g23170	-4.49814	-0.768794	8.87908e-05	0.00110373
Cs3g07240	-1.06235	2.82614	9.16281e-05	0.00113623
Cs1g16390	1.10599	4.62518	9.18959e-05	0.00113886
Cs9g07720	1.64721	1.62064	9.19617e-05	0.00113899
Cs3g18760	1.09703	3.97752	9.36615e-05	0.00115864
Cs8g05040	-1.75857	1.43589	9.37755e-05	0.00115918
orange1.1t03484	3.00679	0.904711	9.38187e-05	0.00115918
orange1.1t03729	2.24981	2.25134	9.49068e-05	0.00117121
Cs3g11620	-1.10974	3.37057	9.67443e-05	0.00119029
Cs6g14090	-1.79832	1.1107	9.70446e-05	0.00119255
Cs2g29060	-1.47667	4.08249	9.74536e-05	0.00119596
Cs7g29540	1.10413	2.99666	9.74976e-05	0.00119596
Cs8g16920	-1.06683	3.44998	9.76113e-05	0.00119663
Cs7g06120	1.51953	3.61265	0.000102136	0.0012491
orange1.1t03694	1.03341	3.22422	0.000103361	0.00126333
Cs6g08175	1.48423	2.51364	0.000105299	0.00128395
orange1.1t00249	1.16036	2.62676	0.000105377	0.00128413
Cs1g14450	-3.43629	0.846798	0.000107334	0.00130642
Cs7g15320	-1.2038	5.59976	0.000107514	0.00130783
orange1.1t04767	-2.38616	0.246985	0.000108273	0.00131628
Cs6g01740	-1.41454	2.30557	0.000108934	0.00132196
Cs3g16310	-1.03651	3.60478	0.00010929	0.0013255
Cs6g16430	-1.00428	3.48304	0.000110743	0.00134073
Cs6g20900	-1.10465	3.21143	0.000111171	0.00134352
Cs5g34280	-3.226	-0.395539	0.000111935	0.00135196
Cs7g16430	-1.03042	4.55094	0.000115782	0.00139287
Cs2g28870	-2.85748	0.803805	0.000117192	0.00140796
Cs8g05490	-1.32908	2.44632	0.000121208	0.00145024
Cs1g03570	-1.63246	1.9898	0.000121918	0.00145702
Cs3g02370	-2.97003	0.0383138	0.000122432	0.00146165
Cs6g07510	2.39361	2.60305	0.000122853	0.00146563
Cs3g14615	1.01836	3.99557	0.00012569	0.00149599
Cs7g24650	-1.7187	1.09303	0.00012622	0.00150054
Cs5g10240	3.27465	3.37911	0.000126621	0.00150443
Cs2g03420	-2.17604	0.525979	0.000127222	0.00150982
Cs7g27910	1.25345	2.92984	0.00012879	0.00152665
Cs7g21730	-1.31346	1.9508	0.000128909	0.00152719
Cs7g13230	-3.02834	0.940665	0.000129568	0.00153409
Cs2g10070	-1.91643	2.47695	0.000129713	0.00153493
Cs5g09240	-1.56267	1.60352	0.000131514	0.00155165
orange1.1t03583	-1.79687	2.70953	0.000133427	0.0015716
orange1.1t02946	1.52268	1.74619	0.000136579	0.00160318
Cs3g15200	-1.02001	3.69235	0.000138363	0.0016204
Cs3g11610	2.02862	0.893776	0.000139088	0.00162769
Cs7g20340	-1.6122	1.42189	0.000139145	0.00162769
Cs7g29760	1.71664	3.15001	0.000141481	0.00165352
Cs1g08535	-3.00052	-0.555684	0.000142573	0.00166492
Cs7g31640	-3.20236	0.653379	0.000142943	0.00166829
Cs7g02340	1.36323	3.27791	0.000145229	0.00169111
orange1.1t01388	2.30088	0.740615	0.000145814	0.00169696
Cs6g01710	-2.03953	1.67714	0.000158091	0.00183148
Cs1g22350	-2.1079	1.34018	0.000158305	0.00183293
Cs2g09900	-1.19199	2.42525	0.00015933	0.00184271
Cs6g19180	1.7494	2.88938	0.000160415	0.00185316
Cs8g17430	-1.18991	2.27478	0.000161598	0.00186367
orange1.1t03054	-4.8981	-0.473621	0.000162753	0.00187593
Cs8g06620	-3.47858	0.603046	0.000166468	0.00191443
Cs3g10980	-1.34216	1.97045	0.000166724	0.0019163
Cs8g04070	-3.0225	-0.0993724	0.00016716	0.00192023
Cs6g10660	2.01378	0.657336	0.00016788	0.00192633
orange1.1t03645	-1.68905	1.25489	0.000168107	0.00192666
Cs2g08210	-2.15946	0.18084	0.000168118	0.00192666
Cs8g05870	-1.80583	1.87907	0.000168516	0.0019293
orange1.1t03363	1.33736	2.23437	0.000168875	0.00193124
Cs3g11500	-3.00053	-0.555765	0.000169227	0.00193418
Cs4g01190	-2.64806	0.44325	0.000169412	0.00193521
Cs2g09820	-1.78288	1.35596	0.000171734	0.00195737
Cs4g18100	5.84078	-1.18202	0.000175068	0.00198871
Cs1g19170	-6.23279	-0.906351	0.000176051	0.00199605
Cs5g15210	-1.28609	2.28626	0.000176105	0.00199605
Cs2g13180	2.93933	-0.181364	0.000176994	0.0020039
orange1.1t02796	1.84304	4.81718	0.000177916	0.00201211
Cs9g02930	2.00582	2.44092	0.00017843	0.00201569
Cs6g13180	-1.16775	2.43252	0.000179811	0.00203018
Cs2g15160	-3.415	-0.555776	0.000181909	0.0020516
Cs6g09480	-1.54691	2.18392	0.000182627	0.00205743
orange1.1t00245	-4.19317	-0.980011	0.000186803	0.00209869
Cs5g16230	-2.42283	1.04669	0.000189836	0.00213042
orange1.1t00208	-1.75806	1.19727	0.000192173	0.00215201
Cs3g23910	-2.14666	0.0753707	0.0001928	0.00215775
Cs7g03860	-1.04777	2.87395	0.000193587	0.0021642
Cs3g03790	-1.84056	0.970634	0.000194222	0.0021701
Cs3g08650	-5.68362	-1.27362	0.000200064	0.00222564
Cs4g08780	-1.22891	3.02782	0.000201437	0.00223727
Cs6g07990	-1.01719	3.76634	0.000203756	0.00225933
orange1.1t01137	-4.45251	-0.801739	0.000204866	0.00226918
Cs7g27290	-2.37292	2.71675	0.00020546	0.00227453
Cs1g09610	-1.60966	1.16349	0.000205739	0.00227638
Cs9g14060	-1.28107	2.57773	0.000210101	0.00232088
orange1.1t00831	-2.42967	0.989615	0.000212132	0.00234204
Cs7g18550	-1.05696	4.75563	0.000214785	0.00236495
Cs2g28150	-1.19839	2.62895	0.000215946	0.00237517
Cs5g28840	-2.05	0.279263	0.000216755	0.00238278
Cs6g18880	-5.75636	-1.22783	0.000218108	0.00239538
Cs9g04050	-4.40473	-0.835693	0.000218135	0.00239538
Cs2g31360	-3.33411	-0.613588	0.000219455	0.00240858
Cs6g13110	-1.0059	3.37074	0.000223928	0.00245241
orange1.1t03176	-1.1407	3.40315	0.000232674	0.00254274
orange1.1t01763	-1.04677	3.7506	0.000234221	0.00255692
Cs8g07220	-1.04568	3.91641	0.000234525	0.00255886
Cs4g03930	5.62227	-1.31966	0.000235509	0.00256685
Cs2g28760	9.20957	1.6364	0.000235995	0.00257079
Cs2g28330	-4.02094	-0.099772	0.000236602	0.00257603
Cs2g16140	-3.45365	-0.527944	0.000237727	0.00258552
orange1.1t01577	-3.2263	-0.395571	0.000241812	0.00262715
Cs3g03620	2.5862	1.8571	0.000243994	0.00264945
orange1.1t04155	-1.57068	2.07874	0.000245754	0.00266431
Cs5g05200	-2.04696	1.29378	0.000253195	0.00273628
Cs2g04090	-1.54974	1.318	0.000254301	0.00274533
orange1.1t02557	-1.21587	2.67135	0.000254989	0.00274839
Cs1g18980	-5.68356	-1.27363	0.000256423	0.00276094
Cs1g18410	-3.61415	-0.801865	0.000256607	0.00276146
Cs7g19210	-2.14648	1.37027	0.000258346	0.00277871
Cs5g16200	-1.85235	0.499379	0.000258627	0.00278028
Cs3g20100	-5.6069	-1.32094	0.000262068	0.00281579
Cs1g05500	-6.12735	-0.980284	0.000267779	0.00287564
Cs9g16770	-1.80278	1.30236	0.000268047	0.002877
Cs2g13800	2.53898	0.62051	0.000271263	0.00290085
Cs6g06880	-6.50912	-0.70497	0.000273903	0.00292297
Cs3g24360	-1.32635	1.79343	0.000279656	0.00297814
Cs6g03350	-1.3332	2.03312	0.000286869	0.00304227
Cs7g02320	-2.4382	-0.0585818	0.0002875	0.00304422
orange1.1t01321	-1.20882	4.61153	0.000288287	0.00304939
Cs3g05810	-1.19324	6.89615	0.00028977	0.0030635
Cs5g02810	-1.41578	1.95057	0.000293281	0.00309421
Cs6g21530	-1.22196	2.54861	0.000301585	0.00316873
Cs4g12270	-1.36276	1.89478	0.000310497	0.00325401
Cs7g17970	-1.02775	2.725	0.0003139	0.00328462
Cs1g03020	2.60267	0.282118	0.000316453	0.00330795
Cs3g12970	-2.31354	0.628821	0.000316711	0.00330895
Cs6g20430	-6.28262	-0.870775	0.000326463	0.0034004
Cs4g02980	1.91112	0.388868	0.000331896	0.00344296
Cs5g07100	-6.01375	-1.0582	0.000332766	0.00345023
Cs4g02190	-1.01896	4.87852	0.00033477	0.00346503
Cs2g16120	-1.97276	1.31757	0.000334871	0.00346503
orange1.1t04768	-1.29958	2.00922	0.000337011	0.00348364
Cs2g03610	-1.68192	1.47113	0.0003382	0.00349084
Cs6g13330	1.20506	2.73497	0.00033822	0.00349084
Cs2g21440	-1.09153	4.07507	0.000344321	0.00354844
orange1.1t03798	-1.77295	1.00968	0.000345691	0.00356076
Cs2g07700	1.00425	6.62649	0.000347597	0.00357498
Cs8g17890	1.5893	0.903579	0.000348526	0.00358209
Cs7g25720	1.72673	2.11982	0.000350226	0.0035966
Cs7g10000	-1.26658	2.82285	0.00035086	0.00360129
orange1.1t05369	4.70281	1.05218	0.000353874	0.00362638
Cs2g11860	-1.25417	2.46749	0.000354014	0.00362638
Cs1g14360	-1.982	0.231027	0.000357728	0.00365408
Cs3g26730	-3.29559	-0.345851	0.000358977	0.00366425
Cs1g24710	-2.3225	1.18794	0.000359145	0.00366425
Cs4g16220	-4.54275	-0.736469	0.000362125	0.00369097
Cs9g03000	-1.50796	4.40575	0.000365209	0.00371869
orange1.1t00549	-2.42222	-0.205962	0.000368499	0.00374437
Cs6g05950	1.44336	1.64513	0.000373007	0.00378113
Cs4g04210	-1.39926	3.85666	0.00038293	0.00386447
Cs5g01240	-4.24134	-0.346151	0.00038551	0.00388284
Cs1g12820	2.19703	2.95209	0.000386891	0.00389483
Cs1g03190	5.69978	-1.27219	0.000392517	0.00394563
orange1.1t00674	-2.62945	-0.0584011	0.000407517	0.00408436
Cs3g16650	-1.08533	2.8067	0.000409242	0.00409965
Cs5g11280	-1.35738	3.20257	0.000413597	0.00413921
Cs1g11380	-1.15964	2.99677	0.000417702	0.00417533
Cs5g22810	1.23654	4.06157	0.000420975	0.00419661
Cs1g15440	-1.52139	1.67198	0.000422198	0.00420674
Cs9g09290	1.95081	3.46108	0.000426857	0.00424902
Cs4g08150	-2.76095	0.0383029	0.000428055	0.00425888
Cs8g11514	-3.26038	-0.370458	0.000430615	0.00428226
Cs4g02220	-3.10661	-0.768643	0.000434723	0.00432101
Cs7g14740	-1.13923	2.08853	0.000441129	0.00438042
Cs6g13830	-1.0472	2.96797	0.000443087	0.00439578
Cs9g03040	1.3815	1.81375	0.000447439	0.00442802
Cs6g18610	-1.66242	1.72454	0.000454408	0.00449046
Cs2g14250	-1.74839	0.858663	0.000455586	0.00449993
Cs9g06360	1.26965	2.60774	0.000459595	0.00453296
orange1.1t00363	-1.02607	2.45052	0.000469108	0.00462009
Cs2g29840	3.97205	-1.13895	0.000474993	0.00466905
orange1.1t02444	-1.32296	1.68988	0.000482088	0.00472062
orange1.1t04133	1.76749	0.944227	0.00048357	0.00473061
Cs4g12970	-1.4982	1.55886	0.00048452	0.00473763
Cs1g09060	-1.36162	1.93065	0.000485803	0.00474563
Cs8g08340	-1.38647	1.50565	0.000490048	0.00477341
Cs1g16010	-1.71125	1.16352	0.000493993	0.00479811
Cs5g34800	-5.75531	-1.22797	0.000496059	0.0048159
Cs2g12450	-2.61187	-0.395341	0.00049846	0.00483232
Cs7g09050	-3.79794	-0.673589	0.000503212	0.00487608
Cs3g14690	2.53826	0.233981	0.000505788	0.00489871
orange1.1t01957	1.65576	4.27453	0.000508767	0.00492057
Cs5g18640	-7.32517	-0.0585349	0.000521953	0.0050338
Cs3g13820	-1.33751	1.63529	0.000525292	0.00506123
Cs5g21780	1.43976	1.94973	0.00052648	0.00507028
orange1.1t05089	5.44911	1.10511	0.000526852	0.00507148
orange1.1t05466	-1.41163	2.52837	0.000528084	0.00508094
orange1.1t02582	-1.25125	2.47801	0.000536614	0.00514901
Cs5g12890	1.20386	2.48599	0.00053667	0.00514901
orange1.1t02903	-1.09616	2.32555	0.000539885	0.00517257
Cs5g08600	2.25399	1.30687	0.000544379	0.00520343
Cs2g10910	-1.52342	3.24569	0.000545084	0.00520773
Cs4g09360	-1.05174	2.68668	0.000546355	0.005215
Cs7g15630	-2.10227	0.230953	0.000550098	0.00524583
Cs4g07210	-2.08476	1.05612	0.000553163	0.00527013
Cs8g19970	5.90644	-1.13896	0.000554936	0.00528457
Cs8g10650	-1.38587	1.42929	0.000555972	0.00529196
Cs9g10970	-1.98184	0.231052	0.000560478	0.00532741
Cs7g18280	-1.07318	3.19679	0.000568446	0.0053906
Cs7g10630	-5.68277	-1.27373	0.000583046	0.00551371
orange1.1t05598	1.03593	3.23216	0.000588568	0.00555308
Cs7g12600	-1.09357	4.45146	0.00059422	0.00559607
Cs2g16870	-2.15736	0.51272	0.000595431	0.00560489
Cs3g26690	-1.64933	2.70034	0.000617659	0.00579013
Cs4g06320	2.32221	-0.15998	0.000624597	0.0058416
Cs8g14510	-1.59663	1.15499	0.000630276	0.00588411
Cs6g16770	2.46937	0.183331	0.000641324	0.00597361
Cs8g12370	1.003	3.38052	0.000642742	0.00598409
Cs5g31400	3.48741	-0.904378	0.000649376	0.00604035
Cs6g19790	-1.95271	1.75925	0.000656242	0.00609313
orange1.1t02071	-2.02137	1.05624	0.000658964	0.00611561
Cs3g23540	-1.41795	1.37109	0.000660494	0.00612171
Cs1g11960	-1.96148	0.371285	0.00066856	0.00618221
Cs4g05910	-5.44113	-1.42035	0.000674676	0.00622749
Cs4g17220	-2.12763	0.759919	0.000678971	0.00625829
orange1.1t02078	-1.00286	3.11064	0.000680588	0.00626791
Cs4g11610	-1.40475	2.43563	0.000687118	0.0063195
Cs4g02390	-3.9445	-1.14045	0.000688914	0.00633318
orange1.1t00382	-3.945	-1.14036	0.000691754	0.00635642
Cs7g08810	-1.34452	2.66502	0.000696864	0.00639475
Cs3g17890	1.92373	1.18413	0.00069924	0.0064108
Cs2g14440	-1.36087	1.83709	0.000701029	0.00642144
Cs7g03710	1.82361	0.79695	0.000702698	0.00642809
Cs5g33450	-2.1951	-0.228251	0.000707814	0.0064689
Cs8g08100	-1.42194	1.31809	0.000720181	0.00657624
Cs5g32610	-5.68292	-1.27371	0.000731213	0.00666506
Cs7g12100	1.71698	1.64556	0.000743085	0.00675821
Cs1g14790	-4.13446	-1.01845	0.000745297	0.00676769
Cs1g20710	-1.61531	1.64113	0.000745453	0.00676769
Cs4g14960	-1.31042	1.52607	0.000759457	0.0068765
orange1.1t00313	2.81571	0.0596867	0.000760953	0.00688699
orange1.1t03247	-2.91948	0.000183381	0.000768351	0.0069478
Cs7g22860	-1.22978	1.99488	0.000775362	0.0070019
Cs5g20440	1.62457	1.79704	0.000786302	0.00709129
Cs3g08290	-5.52575	-1.36986	0.000788541	0.00710835
Cs5g22080	1.38156	2.56273	0.000789276	0.00710985
Cs1g09665	-1.2866	1.84238	0.000790917	0.00711721
Cs8g16840	-5.34984	-1.47283	0.000791993	0.00712376
Cs6g21410	1.42112	1.46101	0.000795106	0.00713918
Cs9g04180	2.19147	-0.24886	0.000797099	0.00715394
orange1.1t04514	-2.3903	-0.228341	0.000809966	0.00725986
orange1.1t00330	-1.0285	3.53051	0.000816004	0.00730437
orange1.1t04895	2.55029	0.00293662	0.000838252	0.00747404
Cs3g13380	3.90306	-1.18203	0.000842976	0.00750962
Cs8g01230	1.26514	1.88333	0.000843774	0.00751344
orange1.1t04174	-2.4737	-0.321356	0.000852579	0.00757864
orange1.1t02077	-1.71772	1.76443	0.000876137	0.00776104
Cs3g07660	-6.37821	-0.802036	0.000876969	0.00776505
Cs3g23280	-3.20186	-0.704662	0.000878123	0.0077719
orange1.1t02478	1.14258	2.30236	0.000907689	0.0080093
Cs4g20060	-3.62117	0.86894	0.000924144	0.00814394
Cs5g13580	2.45266	0.924423	0.00093573	0.00822646
Cs8g07690	-2.29305	-0.0385138	0.000949442	0.00833278
Cs9g10760	-2.5205	0.000259025	0.00094965	0.00833278
Cs8g15610	-1.47284	1.2948	0.000959582	0.00841271
Cs5g29200	-3.33653	0.325147	0.000960674	0.00841867
orange1.1t00089	-5.44124	-1.42033	0.000968394	0.00848268
orange1.1t01572	1.45183	1.20071	0.000972051	0.00851107
Cs3g09100	-2.08572	0.129179	0.000977663	0.00854191
Cs4g18440	5.36577	-1.47168	0.00097885	0.00854862
Cs5g12220	-5.60628	-1.32101	0.000982486	0.00856939
Cs4g06170	-1.41346	1.66582	0.000987296	0.00859956
Cs1g23610	-1.14509	2.21789	0.000989738	0.00861059
Cs5g20110	3.28525	2.06746	0.000997799	0.00866965
Cs7g06250	-2.25394	-0.321327	0.0010004	0.00868852
Cs2g27640	-1.11592	2.3747	0.0010014	0.00869351
Cs6g07700	1.94388	5.04219	0.00100392	0.00871169
Cs9g07540	-1.02379	2.52275	0.001009	0.0087521
Cs9g14360	-1.37702	2.29458	0.00101247	0.00877851
Cs4g09050	1.22315	1.81912	0.00101893	0.00882567
Cs2g16200	-1.18876	4.16365	0.00101964	0.00882567
Cs6g16750	-5.35009	-1.4728	0.00102377	0.00885465
Cs7g08690	1.46164	0.934158	0.00102386	0.00885465
Cs4g18650	-1.81042	0.591553	0.00102828	0.00888541
Cs5g03136	-2.29436	0.180954	0.00103006	0.00889702
orange1.1t04379	-1.56005	1.2628	0.00104195	0.00898074
orange1.1t03452	1.02912	2.48876	0.00105012	0.00903967
orange1.1t03701	1.76218	0.41808	0.0010632	0.00914071
Cs5g32970	1.34496	2.31023	0.00109674	0.0093778
orange1.1t04733	-3.94493	-1.14038	0.00111296	0.00948473
Cs8g06570	-3.52719	0.294108	0.00111727	0.00950568
Cs3g02330	-1.66506	0.889967	0.00112044	0.00952864
Cs4g01370	-1.75704	0.910581	0.00112718	0.00956998
Cs8g07630	-6.19172	1.33049	0.0011372	0.00962327
Cs9g05660	-1.60202	2.15384	0.0011435	0.00966843
Cs1g14160	-1.57465	0.539725	0.00114567	0.00968277
Cs1g07740	-1.85872	0.146618	0.00114981	0.00969368
Cs1g18450	-2.91638	-0.613472	0.00115859	0.00975561
Cs5g05870	-1.47654	2.30607	0.0011603	0.00976197
Cs1g20130	1.36387	1.69977	0.00116247	0.00977434
Cs5g29040	-1.34318	2.226	0.00116622	0.0097853
Cs5g17380	5.36444	-1.47184	0.00117132	0.00981428
Cs7g03880	-5.25299	-1.52722	0.00117673	0.00984749
Cs5g18050	1.66987	3.3758	0.0011779	0.00985331
Cs5g02910	-1.37563	2.11035	0.00118044	0.00986763
Cs4g12530	5.69923	-1.27226	0.00118058	0.00986763
orange1.1t00250	-2.32285	-0.273987	0.00118549	0.00990459
Cs8g15510	2.55177	0.00317525	0.00119567	0.00996924
Cs7g15150	2.53058	0.433173	0.00119818	0.00998614
Cs1g17210	1.3385	5.12071	0.00120543	0.0100261
orange1.1t00666	1.47788	1.91956	0.00121308	0.0100857
Cs2g09830	-2.34979	0.578288	0.00121402	0.0100893
Cs3g07780	-1.98167	0.31058	0.00121479	0.0100916
orange1.1t02977	1.67798	2.70655	0.00122262	0.0101443
Cs5g21250	1.16229	2.4005	0.00123396	0.010226
Cs7g06750	-2.35461	1.26254	0.00124184	0.0102663
Cs6g08440	-5.68305	-1.27369	0.00124304	0.0102679
Cs9g06750	2.11062	0.728823	0.00124599	0.0102757
Cs3g13910	-1.84238	0.725479	0.00125812	0.0103632
Cs5g31860	-5.25275	-1.52726	0.00126901	0.0104395
Cs6g17170	-1.38584	1.75394	0.00126994	0.0104395
orange1.1t03339	2.49818	-0.0360157	0.0012766	0.0104816
Cs3g11700	-1.62673	2.89106	0.00128205	0.0105203
Cs9g07440	-1.24838	1.4367	0.0012839	0.0105246
Cs3g24680	-1.10078	2.54236	0.00128458	0.0105259
Cs7g05620	-5.52695	-1.36972	0.001306	0.0106678
Cs5g21690	1.02525	4.95287	0.00131878	0.010763
Cs6g06220	-2.45743	-0.500261	0.00132261	0.0107856
Cs6g19670	-1.04554	2.91319	0.00132609	0.0108054
Cs9g09530	-1.17944	4.65049	0.00132825	0.0108144
Cs7g01390	1.55554	2.98342	0.00133503	0.0108514
Cs7g18330	1.15392	2.95279	0.00134364	0.0109067
Cs5g21190	1.16294	2.68782	0.00134659	0.0109159
Cs2g18270	1.60296	1.42579	0.00134746	0.0109186
Cs9g16820	1.43104	4.9284	0.00135004	0.0109288
Cs3g07850	-1.02884	3.92171	0.00135068	0.0109288
Cs5g18010	1.51327	3.59532	0.00135781	0.0109647
Cs2g24600	2.51389	-0.671695	0.00136249	0.0109957
Cs3g17800	-1.09198	2.04258	0.00136289	0.0109957
Cs3g17150	1.71815	0.818906	0.00136778	0.0110221
Cs5g01880	-2.12997	0.989761	0.00137084	0.011038
Cs6g08060	1.02279	3.24844	0.0013782	0.0110842
Cs3g24580	-1.02308	2.5718	0.00138	0.0110899
Cs1g16180	-3.92147	-0.584494	0.00139199	0.0111731
Cs5g19795	1.03433	3.21191	0.00140498	0.0112557
Cs7g05460	2.08886	4.5699	0.00140503	0.0112557
Cs4g12260	2.03954	0.0778438	0.00141315	0.0112986
Cs6g15970	-1.54463	1.00981	0.00144815	0.0115378
Cs3g14730	2.49729	3.18367	0.0014585	0.0116157
Cs2g12810	1.24493	1.68113	0.0014659	0.011661
Cs6g08855	1.15473	4.41996	0.00149089	0.0118347
Cs4g12990	-1.50083	1.40063	0.00149876	0.0118854
Cs5g27950	-4.01113	-1.09867	0.00150395	0.0119153
Cs7g16890	-2.73507	0.512195	0.00150443	0.0119153
Cs7g30110	-1.86696	1.11928	0.00150487	0.0119153
Cs6g17750	-1.34396	2.05589	0.00151325	0.0119701
Cs6g15650	-5.6828	-1.27372	0.00151354	0.0119701
Cs1g22040	3.13683	-0.766753	0.00151928	0.0120062
Cs4g10730	-2.61159	-0.39534	0.00152205	0.0120234
Cs5g24820	-7.83976	0.385213	0.00155367	0.0122343
Cs3g01590	-2.53171	1.54491	0.00155414	0.0122343
Cs8g21000	-2.01777	0.616535	0.00157108	0.0123392
Cs3g18420	-5.60804	-1.3208	0.00158715	0.0124463
Cs5g30390	-1.85888	3.01278	0.00158877	0.0124494
Cs6g06180	-5.25265	-1.52727	0.00159897	0.0125198
Cs2g16510	-5.25317	-1.5272	0.0016021	0.0125346
Cs6g20890	-1.70624	0.629224	0.00161758	0.012637
Cs1g23370	2.05288	0.417983	0.00162737	0.0126983
Cs2g21700	-1.14146	1.78243	0.00163782	0.0127662
Cs9g16810	2.06388	4.56281	0.00163794	0.0127662
Cs2g24110	-1.13808	1.96566	0.00166046	0.0129072
Cs5g25630	-1.26302	1.42228	0.0016625	0.0129182
Cs4g05510	-1.16257	2.46433	0.00171287	0.0132084
Cs5g33830	-1.56011	1.05677	0.0017176	0.0132306
orange1.1t01320	-4.13321	-1.01862	0.00173954	0.0133586
orange1.1t05194	4.10363	-0.0551563	0.0017401	0.0133586
Cs6g10340	-2.31731	0.197508	0.001767	0.0135346
Cs2g06550	-1.99822	0.72535	0.00178041	0.0136271
Cs1g16200	-2.40923	-0.0786703	0.00178817	0.0136814
Cs5g34010	-1.5396	0.713966	0.00179371	0.0137187
orange1.1t00452	-1.3215	1.43641	0.00180906	0.0138206
Cs9g15620	1.14158	2.7111	0.00181655	0.0138726
Cs5g05240	-1.18045	2.42922	0.00182947	0.0139387
Cs5g12850	-1.73297	0.847894	0.00182998	0.0139387
Cs1g12300	-4.86366	-0.50017	0.00185476	0.0141117
Cs9g18240	-3.28416	-1.01842	0.00187172	0.0142195
Cs6g18930	-2.78144	-0.473388	0.00191431	0.0144915
Cs6g21600	-1.15463	1.59772	0.00191868	0.0145169
Cs7g05470	-1.4367	0.690417	0.00192013	0.0145225
orange1.1t01910	-1.08176	2.58149	0.00192374	0.0145403
orange1.1t04700	3.90123	0.360558	0.00192641	0.0145538
orange1.1t00167	-6.01341	-1.05823	0.0019738	0.0148788
Cs8g03840	5.16403	-1.58286	0.00198143	0.0149309
orange1.1t05897	-2.74912	1.17962	0.00198331	0.0149395
Cs5g32110	1.68443	0.840398	0.00198761	0.0149664
Cs2g22140	-2.32493	-0.27405	0.00200818	0.0150869
Cs7g07980	1.46008	0.774226	0.00201967	0.015152
Cs9g14100	1.66383	0.913779	0.00203164	0.0152306
Cs5g31660	1.41186	1.32131	0.00203447	0.0152407
Cs1g20970	-1.49376	1.47831	0.00206371	0.0154314
Cs7g02350	1.07453	3.05811	0.00206587	0.0154419
orange1.1t00046	-1.6268	0.678269	0.00207043	0.015459
Cs2g14790	1.09696	3.24725	0.00208474	0.0155545
Cs8g19850	-5.43997	-1.42048	0.00210589	0.0156785
Cs8g14700	-1.24155	1.79346	0.0021121	0.0157184
Cs2g04740	-2.73229	-0.736193	0.00211501	0.0157344
Cs7g08460	-2.41608	-0.527715	0.00211784	0.0157497
orange1.1t06010	1.2601	2.48973	0.00212398	0.0157782
Cs4g03390	-1.18809	2.2864	0.00213759	0.0158735
orange1.1t03711	1.93464	0.0958703	0.00215389	0.0159771
Cs5g24240	1.7132	0.446429	0.00219493	0.0162109
Cs7g08680	1.56952	1.66383	0.00220855	0.0162938
orange1.1t04296	1.67	0.785455	0.00221027	0.0163006
Cs7g01770	-5.14863	-1.58382	0.00221535	0.0163322
Cs9g09650	3.19882	0.965692	0.00222658	0.0164057
orange1.1t03587	-1.63478	0.869177	0.00222692	0.0164057
Cs2g03280	-1.31103	1.27119	0.00223219	0.0164327
Cs7g13670	5.84011	-1.1821	0.00224677	0.0165222
Cs9g17640	-1.53784	0.617038	0.00225001	0.0165341
Cs6g06060	1.23667	1.41111	0.00225535	0.0165614
Cs1g21010	4.27483	-0.940903	0.00228125	0.0167435
Cs8g16580	-3.8027	-1.22785	0.00229375	0.0168071
Cs7g18660	-2.73155	-0.736113	0.00233808	0.0170891
Cs4g02270	-5.82425	-1.18362	0.00234011	0.0170978
Cs5g23630	-1.31748	1.24692	0.00234175	0.0171036
orange1.1t04064	-5.25253	-1.52728	0.00234795	0.0171385
orange1.1t02937	1.44056	0.993456	0.0023482	0.0171385
Cs7g27110	-1.37051	1.39327	0.00235963	0.0172097
Cs4g13780	-1.46613	1.19741	0.00236483	0.0172291
Cs5g31090	-1.25319	1.41509	0.00236725	0.0172304
Cs8g09146	5.36379	-1.4719	0.00239752	0.0174114
Cs2g07720	1.46587	6.01737	0.00240647	0.017464
Cs4g07160	1.84956	0.200483	0.00243089	0.0176224
Cs3g16930	2.92551	-0.904404	0.00245078	0.017754
Cs1g13940	-3.64608	-1.32083	0.00245343	0.0177669
Cs6g12900	-1.3275	0.971164	0.00246025	0.01781
Cs4g09440	1.06403	3.05119	0.00246714	0.0178535
Cs7g16030	1.04017	6.49745	0.00254426	0.0183273
Cs3g17400	1.02647	2.14945	0.00256538	0.0184664
Cs3g23530	-2.33696	1.3921	0.00259983	0.0186753
Cs4g03720	-1.44506	1.21414	0.00264163	0.018922
Cs1g19890	-2.32967	-0.584223	0.00271272	0.0193493
Cs7g16380	1.23338	1.50236	0.00274039	0.0195199
Cs2g07630	-3.72762	-1.27354	0.00275174	0.0195736
Cs2g21340	-2.50735	-0.297604	0.00278687	0.0197821
Cs8g17030	1.95697	0.022044	0.00280778	0.0199166
Cs5g21700	1.38281	3.89309	0.0028367	0.0201008
Cs6g07310	-1.80683	0.111505	0.00284162	0.0201287
Cs8g12730	-4.13521	-1.01851	0.00284918	0.0201753
Cs6g12400	-1.09061	2.61606	0.00288228	0.0203744
Cs2g22365	1.42269	1.14944	0.00289448	0.0204323
Cs5g07230	2.70311	2.8006	0.00290215	0.0204794
Cs7g15690	1.19228	1.2821	0.00291084	0.0205142
Cs6g22380	-3.22212	-1.05789	0.0029111	0.0205142
orange1.1t01834	1.0373	2.62332	0.00293871	0.0206803
Cs2g23820	1.04172	3.27289	0.0029668	0.0208564
Cs7g10470	-1.59561	0.444112	0.00298529	0.0209719
Cs6g10970	-3.56037	-1.36973	0.00305095	0.0213451
Cs2g16810	-5.14909	-1.58376	0.0030596	0.0213837
Cs6g05260	1.60613	0.373799	0.00306537	0.0214167
Cs1g17770	-2.07461	0.294998	0.00309703	0.0216231
Cs6g20750	5.05233	-1.64174	0.00312382	0.0217804
Cs2g19920	1.43802	1.75178	0.00312579	0.0217867
Cs6g07470	-1.47227	0.713902	0.00313858	0.0218609
Cs7g04300	3.75325	-1.27242	0.0031579	0.0219656
Cs8g15350	-1.70773	0.198003	0.00316943	0.0220233
orange1.1t04400	-2.46214	0.197313	0.00322323	0.0223137
Cs7g25470	-5.03662	-1.64267	0.00325396	0.0224655
Cs3g07150	-2.81703	-0.251306	0.00329126	0.0226847
orange1.1t03594	-1.62715	1.30997	0.00333579	0.0229452
Cs3g20060	-1.15794	1.93114	0.003337	0.0229452
Cs7g05450	2.71602	0.670255	0.00334009	0.0229516
orange1.1t04098	2.35987	-0.582486	0.00334576	0.0229828
Cs2g06270	-2.31511	0.628661	0.00336351	0.0230893
orange1.1t04208	-3.156	-1.09851	0.00338321	0.0231933
Cs2g27910	-1.47264	1.29471	0.00338584	0.0232035
Cs5g27660	-5.34931	-1.47288	0.00339698	0.0232721
Cs5g31130	-2.8262	-0.673512	0.0033983	0.0232733
Cs8g16090	-1.05878	2.45022	0.00341671	0.0233681
orange1.1t05027	5.90879	-1.13869	0.00342753	0.023425
Cs1g12890	1.45563	1.00308	0.00343905	0.0234738
Cs3g27810	1.01048	3.43912	0.00344996	0.0235246
Cs1g02890	-2.7766	-0.979955	0.00345245	0.0235338
Cs8g16025	-3.2211	-1.05795	0.00349324	0.0237406
Cs5g27320	-3.72785	-1.27352	0.00356294	0.0241741
orange1.1t03618	2.48297	0.489115	0.00358039	0.0242666
Cs8g04310	-1.83886	-0.0384311	0.00358133	0.0242666
Cs4g08610	-1.03189	2.46456	0.00358953	0.024306
orange1.1t03948	-1.42037	0.539928	0.00360357	0.0243688
Cs6g21260	3.04232	-1.18218	0.00360649	0.0243724
Cs1g03850	1.82455	-0.160136	0.00364053	0.0245538
Cs4g01120	-2.32947	-0.584189	0.00365813	0.0246643
Cs2g29090	-2.71725	0.146055	0.00367543	0.0247646
Cs7g01750	-2.73343	-0.736229	0.00373384	0.0250673
Cs1g21380	-5.0371	-1.64261	0.00374531	0.025136
Cs1g13970	-2.53637	-0.446667	0.00375985	0.0252088
Cs6g03700	-1.52422	0.748619	0.00376286	0.0252199
Cs1g18240	5.05262	-1.64171	0.00376622	0.0252199
Cs4g20010	-1.04132	2.46092	0.00381646	0.025488
orange1.1t04039	1.21085	1.41826	0.00384231	0.0256355
Cs3g07440	1.41462	2.76199	0.00384784	0.025664
orange1.1t00760	1.19952	1.41101	0.00387281	0.0257745
Cs3g13090	-3.87579	-1.18342	0.00393388	0.0261355
Cs3g20430	-1.70043	0.263399	0.00395474	0.0262315
orange1.1t02156	-1.45155	0.4581	0.00395796	0.026243
Cs8g04000	-1.34837	1.23909	0.00396674	0.0262514
orange1.1t03987	5.05137	-1.64184	0.0039811	0.0263294
orange1.1t03643	1.10398	1.58812	0.00399991	0.0264281
Cs2g23970	1.58038	0.166155	0.00404526	0.0266913
Cs8g15830	-1.14314	1.41521	0.00406233	0.0267627
orange1.1t02720	3.67343	-1.31965	0.00411494	0.0270221
orange1.1t01764	-2.57652	-0.613267	0.0041226	0.0270587
Cs7g12820	-2.7765	-0.979965	0.00417016	0.027332
Cs9g08030	-2.18798	0.000303053	0.00417236	0.0273377
orange1.1t01111	-5.03701	-1.64262	0.00417712	0.0273601
Cs1g11080	1.98009	-0.159953	0.0041862	0.0274108
Cs3g20630	-2.47327	-0.321427	0.00422281	0.0276151
Cs7g01880	-1.23925	2.0331	0.00424804	0.0277358
Cs3g23650	-2.61908	-0.584298	0.00426177	0.0278165
Cs8g17420	-3.24718	-0.673557	0.00438106	0.0284536
orange1.1t01307	5.6989	-1.2723	0.00438305	0.0284536
Cs7g31620	-3.00396	-0.835718	0.00438668	0.0284682
Cs7g18150	-2.66154	-0.55558	0.00438881	0.0284729
orange1.1t01873	-1.59833	0.326185	0.00442112	0.0286552
Cs4g04170	-1.2093	1.14658	0.00442827	0.0286924
Cs8g01290	-2.62781	-0.0586598	0.00442965	0.0286924
Cs5g21890	1.32891	0.954072	0.00445066	0.0287589
Cs9g03290	-2.06307	-0.44657	0.00447567	0.0288897
orange1.1t03735	-3.46977	-1.42029	0.0044772	0.0288904
Cs7g32160	-2.27972	-0.80164	0.00449212	0.0289661
Cs6g06610	-1.03207	2.2469	0.00449499	0.0289686
Cs6g04940	-1.94071	-0.395107	0.00453868	0.0292266
orange1.1t03453	1.90477	1.95947	0.00454861	0.029274
orange1.1t05497	-1.51629	0.553064	0.00458535	0.0294581
Cs1g10680	1.1129	2.36761	0.00459918	0.0295284
Cs3g23200	-1.43886	1.00967	0.00461535	0.029578
Cs9g15830	-1.04922	1.99994	0.00461989	0.029587
Cs4g16610	-7.06188	-0.274519	0.00467368	0.0298753
Cs6g11190	-1.49931	0.198091	0.00475587	0.0303153
Cs1g23090	-1.32471	2.2132	0.00475996	0.0303319
Cs6g13780	-2.7771	-0.979868	0.00476617	0.0303526
Cs9g10100	-1.42101	1.19772	0.0048042	0.0305472
Cs5g30770	-2.46282	-0.905859	0.00480991	0.030574
orange1.1t05169	1.4177	0.56828	0.00486528	0.0308779
Cs8g14810	-2.71386	-1.01833	0.00488314	0.0309624
Cs2g27070	1.38565	1.05981	0.00489382	0.0310013
Cs7g18270	-4.35509	-0.87046	0.00491124	0.0310827
Cs4g18420	-1.36234	2.06955	0.00493722	0.0312181
Cs5g04690	-1.1704	1.47865	0.00495643	0.0313202
Cs9g13780	-4.91536	-1.704	0.0049887	0.0314989
Cs5g31460	-5.03628	-1.6427	0.00498951	0.0314989
orange1.1t03043	1.0073	4.5488	0.00500046	0.0315497
orange1.1t04524	-1.84604	0.616918	0.00501223	0.0316142
Cs9g02960	5.33812	0.542014	0.00502249	0.0316691
Cs4g06090	2.80712	-0.978496	0.00502503	0.0316753
orange1.1t03450	-5.14922	-1.58375	0.00502658	0.0316754
Cs4g10020	3.11381	-1.13919	0.00504687	0.0317659
Cs7g10620	-1.00744	1.79911	0.0050478	0.0317659
Cs7g21340	1.93343	0.403852	0.00504872	0.0317659
Cs1g22010	-1.01992	1.96596	0.0050686	0.0318812
Cs8g01960	1.8446	2.91574	0.005084	0.0319583
Cs3g10320	-5.8236	-1.18369	0.00510421	0.0320558
Cs7g27510	-1.00652	1.86392	0.00510579	0.0320559
orange1.1t01747	-5.25193	-1.52733	0.00515957	0.0323439
Cs3g24170	-1.33102	1.69567	0.00520412	0.0325731
Cs6g14010	-1.08511	3.64237	0.00521984	0.0326316
Cs5g24320	-1.11528	1.57207	0.00525426	0.0328166
Cs7g11790	-3.3438	-0.980104	0.00527294	0.0328931
Cs2g30970	-2.46275	-0.905883	0.0053352	0.0332023
Cs5g12880	1.43384	1.70591	0.00533674	0.0332023
Cs6g06120	-1.02371	2.81801	0.00545255	0.0337764
Cs4g17230	-1.82884	0.27957	0.00547579	0.0338837
orange1.1t03154	-1.5216	0.702216	0.00553133	0.0341883
Cs7g13190	-3.56054	-1.36969	0.00553861	0.0342058
Cs7g13970	-1.30894	1.96577	0.00556915	0.0343425
Cs4g11700	-2.39999	-0.370168	0.00560698	0.0345445
Cs4g07310	-1.24835	0.848369	0.00566227	0.0348059
Cs3g03590	1.36515	4.14105	0.00571123	0.0350705
Cs7g10530	-2.00933	0.0753821	0.00578976	0.0354888
Cs6g15270	2.03052	0.60708	0.00580463	0.035541
Cs6g18360	-2.0848	0.128868	0.00581109	0.0355661
orange1.1t01518	-4.44966	-0.802106	0.00583418	0.0356541
orange1.1t02050	1.41893	1.11444	0.00587219	0.0358435
Cs3g04040	-1.5116	0.443903	0.00587396	0.0358436
orange1.1t03582	1.11627	1.69303	0.00597161	0.0363743
Cs5g21910	2.96589	-1.22663	0.00599905	0.0364979
Cs5g33980	-1.05085	1.95608	0.00606685	0.0368009
Cs4g19680	-2.40287	-0.942456	0.00607248	0.0368241
Cs3g16130	1.6257	0.502151	0.00607592	0.036834
Cs2g29120	1.07642	4.76553	0.00609198	0.0368986
Cs1g09640	-1.27833	1.1026	0.00610216	0.0369493
Cs1g18300	-1.05842	2.63491	0.00610773	0.0369611
Cs2g05360	5.05184	-1.64179	0.00614244	0.0371381
Cs4g15725	-1.32187	1.33364	0.00616295	0.0372401
Cs8g17470	-3.08565	-1.14035	0.00617778	0.0373187
orange1.1t02398	-1.48634	0.678581	0.00618194	0.0373328
Cs2g30750	-1.1807	1.0384	0.00618965	0.0373572
Cs7g30650	-1.61156	0.617032	0.00619911	0.0373901
orange1.1t01356	-1.14335	1.68983	0.0062071	0.0374184
Cs9g15130	-1.46476	0.616948	0.00629406	0.0378756
Cs5g24105	1.42811	1.72355	0.00633888	0.0381116
orange1.1t05372	-2.13878	-0.704266	0.00634626	0.0381448
Cs3g26140	-2.22745	-0.205848	0.00635176	0.0381553
Cs6g21960	1.98205	-0.0562419	0.00638357	0.0383239
Cs4g12320	-1.07966	2.00478	0.00640393	0.0384123
Cs9g04760	-3.46925	-1.42035	0.00641497	0.0384672
Cs6g01270	4.92966	-1.70328	0.00645889	0.0386966
Cs9g11670	-5.03714	-1.64261	0.00646569	0.0387259
Cs8g16130	-5.03613	-1.64271	0.00647046	0.0387431
Cs3g07720	-4.49639	-0.768967	0.00647833	0.0387726
Cs8g14870	-1.02249	1.55287	0.00650776	0.0389095
Cs9g05820	1.7028	0.313404	0.00651966	0.0389692
Cs7g21950	-2.4031	-0.942387	0.00655447	0.0391201
orange1.1t02868	-1.08937	1.86905	0.00659597	0.0392875
Cs1g08190	-1.30469	1.23905	0.00663619	0.0394609
Cs3g16600	-1.02393	3.06984	0.0066579	0.0395296
Cs2g05740	-1.56143	1.35581	0.00666	0.0395306
Cs3g12700	-3.15706	-1.0985	0.00667671	0.0395952
Cs3g18110	-1.27958	1.66015	0.00668578	0.0396376
Cs7g24240	-2.16151	-0.251017	0.00672537	0.0398376
orange1.1t02504	-1.78485	1.71242	0.00678401	0.0401152
Cs7g02510	-1.27644	1.03822	0.00679719	0.0401815
Cs8g07870	-5.52728	-1.3697	0.00681862	0.0402965
Cs6g09420	1.02911	3.1966	0.0068406	0.0403914
orange1.1t05979	1.33637	0.850771	0.00687751	0.0405624
Cs2g11480	-3.4035	-0.942675	0.00689441	0.0405936
Cs5g21870	1.12976	1.86184	0.00698123	0.0410557
Cs2g01100	-1.70128	0.263566	0.00707249	0.0414968
Cs9g11990	-3.46982	-1.42026	0.00709626	0.0416124
Cs1g09300	-3.46914	-1.42036	0.00710203	0.0416224
Cs8g15720	-5.25177	-1.52734	0.00711811	0.041688
Cs8g01090	2.35475	-0.419082	0.00712813	0.0417222
Cs6g13360	1.32396	1.73476	0.0071377	0.0417595
Cs6g06240	-1.62973	0.146739	0.00718765	0.0420397
Cs7g29030	-2.25495	-0.321233	0.00719185	0.0420523
Cs1g16850	1.57816	0.0217557	0.00723964	0.0422592
Cs4g18160	2.3134	-0.611675	0.00727791	0.0424462
Cs1g20180	-1.21395	2.35584	0.00734817	0.0427705
Cs6g02325	1.18426	2.04138	0.00735096	0.0427746
Cs2g29820	3.04138	-1.1823	0.00736192	0.0428017
Cs2g31090	-1.37437	0.604455	0.00739014	0.0429244
Cs2g17400	1.65229	0.343847	0.00739695	0.0429444
orange1.1t02204	1.16171	2.59772	0.00743618	0.0431237
Cs7g23610	1.45468	0.388697	0.00749164	0.0433832
Cs7g01340	-1.21298	1.1203	0.00752174	0.0435328
orange1.1t00751	3.32807	0.861313	0.00756728	0.0437468
Cs2g22370	-2.6479	-1.05794	0.00765317	0.0441559
Cs7g07910	-5.60552	-1.32107	0.00770687	0.0444532
Cs5g11300	-1.51712	0.000820832	0.00771154	0.0444675
Cs7g17130	-1.57716	0.0386642	0.00771764	0.0444902
Cs9g11270	-1.49618	0.129343	0.00772701	0.0445191
Cs9g16230	3.62741	0.54195	0.0077638	0.0446807
Cs5g12270	-1.58973	0.702121	0.00776685	0.0446856
Cs4g17370	-5.03703	-1.64262	0.00778285	0.0447525
Cs2g30830	-4.14511	-2.79728e-05	0.0077979	0.0448012
Cs2g10140	1.93103	-0.41909	0.00786599	0.045091
Cs1g09366	-1.37833	0.858878	0.0078835	0.045166
Cs8g05520	-1.14519	1.29491	0.0079205	0.0453399
orange1.1t01050	-2.41419	0.163697	0.0079327	0.045397
Cs7g05540	1.21968	2.20997	0.00795475	0.0454977
Cs2g25300	-1.13253	1.03844	0.00799203	0.0456726
Cs8g08010	-1.23263	2.25056	0.00800176	0.0457026
Cs6g21450	-4.78243	-1.76812	0.00805604	0.0459662
Cs4g05960	-4.78243	-1.76812	0.00805691	0.0459662
Cs1g21860	-4.78243	-1.76812	0.0080602	0.0459721
orange1.1t00904	-1.28251	0.941303	0.00808356	0.0460797
Cs1g23480	-2.46524	-0.0384876	0.00809984	0.0461466
Cs4g02230	-3.40294	-0.942444	0.0081196	0.0462335
orange1.1t04042	-2.71494	-1.01828	0.00819239	0.0465831
Cs4g14510	1.87711	1.37382	0.00823434	0.0467696
Cs1g25820	-2.85662	-1.27355	0.00828757	0.0470196
Cs3g08500	-1.03389	1.51956	0.00829748	0.0470628
Cs3g02020	1.51161	1.04133	0.00836528	0.0473423
Cs3g08570	1.11493	1.06869	0.0083964	0.0474789
Cs2g17070	-5.14783	-1.58388	0.00843357	0.0476364
orange1.1t01992	-1.43011	0.4441	0.00874758	0.049179
Cs2g07380	2.21963	-0.671692	0.00879373	0.0493705
orange1.1t02748	-4.78232	-1.76813	0.00880763	0.0494262
Cs7g20260	-4.78232	-1.76813	0.00881085	0.0494262
Cs1g09050	1.18217	1.14041	0.00883012	0.0494796
Cs8g17410	-2.57437	-0.613349	0.00891022	0.0498465
Cs1g23940	-2.4012	-0.370013	0.00891327	0.0498499

## Sheet: 210vs230 Orange
Gene_ID	logFC	logCPM	PValue	FDR
Cs7g01400	4.60375	8.36583	4.41592e-115	8.89455e-111
Cs7g22730	3.17123	9.03733	1.9305e-67	1.94421e-63
Cs6g16980	3.03938	8.5125	4.88671e-64	3.28094e-60
Cs3g26210	2.97363	7.30945	1.42102e-62	7.15553e-59
Cs2g15520	2.82188	9.63859	4.96751e-61	2.00111e-57
Cs8g05970	2.90919	8.96076	4.17696e-60	1.4022e-56
Cs5g10180	2.8014	8.57219	3.1355e-58	9.02217e-55
Cs2g17030	2.94687	7.25729	1.76057e-57	4.43267e-54
Cs1g20270	3.71235	8.31701	1.11917e-55	2.5047e-52
Cs4g03740	3.77656	4.9096	1.95226e-54	3.93224e-51
Cs7g09440	3.82691	5.17765	2.2381e-54	4.09816e-51
Cs6g18330	-2.88492	6.55926	1.02958e-52	1.72815e-49
Cs5g30850	2.55257	9.57002	2.14504e-52	3.17824e-49
Cs3g06440	2.8545	8.43136	2.20908e-52	3.17824e-49
Cs1g25120	-2.71684	8.3747	6.66294e-51	8.94699e-48
Cs6g05140	-3.47116	7.09286	7.48648e-50	9.42454e-47
Cs3g26410	2.88324	6.12747	2.66975e-49	3.16318e-46
Cs9g17990	2.44962	10.3936	3.20842e-49	3.59022e-46
Cs4g12760	2.81755	5.67073	1.02435e-48	1.08592e-45
Cs5g05470	2.44182	6.75462	1.00242e-47	1.00954e-44
Cs2g23750	2.852	8.85402	3.06682e-46	2.94152e-43
Cs3g18330	3.6227	6.62443	3.33814e-46	3.05622e-43
Cs2g18250	2.69101	7.38195	9.7762e-46	8.5614e-43
Cs5g28990	2.39198	8.29521	3.14313e-45	2.63787e-42
Cs3g10250	2.54457	8.77082	2.46848e-44	1.9888e-41
Cs4g01430	2.20424	7.25321	9.32238e-44	7.22198e-41
Cs2g09840	2.33861	6.20581	1.29014e-42	9.62442e-40
Cs3g16570	2.39579	7.5314	3.93696e-42	2.83208e-39
Cs9g18660	2.02167	7.94439	1.08773e-41	7.55485e-39
Cs6g16650	2.45608	7.38424	2.21315e-41	1.48591e-38
Cs9g17750	-3.27909	6.64481	2.79582e-41	1.81656e-38
Cs2g13440	2.59493	5.57646	2.99921e-41	1.88782e-38
Cs3g25370	2.06109	8.28041	1.19713e-40	7.30684e-38
Cs8g12640	2.1883	8.89777	1.48001e-39	8.76773e-37
Cs8g10860	-2.38341	5.71082	3.3103e-39	1.90503e-36
Cs2g16770	2.48372	5.6569	1.70043e-38	9.51388e-36
Cs2g06950	3.32053	5.58964	3.70034e-38	2.01438e-35
Cs5g15510	1.97933	7.52352	3.88458e-38	2.02929e-35
Cs2g10080	2.26222	9.94907	3.92921e-38	2.02929e-35
Cs7g03050	2.01184	7.25755	4.23184e-38	2.13094e-35
Cs5g17920	3.09551	6.83419	2.60661e-37	1.28055e-34
Cs3g19760	2.55639	8.14163	6.81271e-37	3.26718e-34
Cs2g16900	2.47227	7.83456	1.16349e-36	5.45e-34
Cs3g21500	-2.39515	7.56742	3.06199e-36	1.40169e-33
Cs9g16640	2.68002	10.2021	3.31046e-36	1.48176e-33
Cs3g21660	4.01965	5.95975	3.48976e-36	1.52806e-33
Cs1g14300	4.09882	3.4538	8.26442e-36	3.54174e-33
Cs8g11330	1.97995	8.98754	1.26844e-35	5.32271e-33
Cs7g11210	1.9649	6.76176	1.75552e-35	7.21626e-33
Cs2g24670	2.91915	8.82822	4.98049e-35	2.00634e-32
Cs8g16910	2.29886	6.38873	5.79192e-35	2.28747e-32
Cs2g07100	3.44953	6.26984	6.12695e-35	2.37325e-32
Cs1g17220	2.71065	7.96558	3.87323e-34	1.47197e-31
Cs3g17230	2.77168	5.93034	7.50722e-34	2.80019e-31
Cs5g17900	2.85315	5.36181	1.06034e-33	3.88317e-31
Cs6g11940	2.04274	9.11682	1.70524e-33	6.13339e-31
Cs8g16290	2.46044	8.3314	3.49224e-33	1.23405e-30
Cs1g13530	1.90105	9.53535	4.72698e-33	1.64156e-30
Cs5g30230	-2.14105	7.09728	7.09212e-33	2.42118e-30
Cs3g20040	-2.73802	6.20498	1.28526e-32	4.3146e-30
Cs6g15130	2.26954	6.14085	1.8893e-32	6.23842e-30
Cs6g15150	2.83378	4.70037	2.80397e-32	9.10928e-30
Cs4g06290	2.69533	6.26627	3.39309e-32	1.08482e-29
Cs3g24230	2.65843	9.29046	4.69672e-32	1.47815e-29
Cs7g02540	2.38308	5.21425	5.31297e-32	1.64637e-29
Cs2g21960	2.09153	6.42629	8.16975e-32	2.49326e-29
Cs2g06650	1.87631	9.11374	8.61754e-32	2.56923e-29
Cs1g22200	-1.90546	5.80161	8.67379e-32	2.56923e-29
Cs1g20420	-2.40527	6.40056	9.66015e-32	2.81992e-29
Cs4g14230	2.95437	6.0347	1.58665e-31	4.56548e-29
Cs5g13010	1.94702	7.30467	2.28159e-31	6.47263e-29
Cs4g09670	-2.87141	5.50177	2.97542e-31	8.32374e-29
Cs8g14950	3.88762	8.97588	3.73999e-31	1.03193e-28
Cs6g21210	1.90479	8.16231	4.47126e-31	1.21703e-28
orange1.1t02389	2.6808	7.76362	6.07429e-31	1.63131e-28
Cs5g03460	-1.79198	6.37747	1.62654e-30	4.31077e-28
orange1.1t02608	-3.04416	4.49325	1.8515e-30	4.84323e-28
Cs5g32110	3.60818	3.90882	1.93528e-30	4.99749e-28
Cs2g30320	1.73302	8.11137	1.98216e-30	5.05375e-28
Cs2g28030	-1.95668	7.32614	4.77012e-30	1.201e-27
Cs2g07700	3.09671	9.14589	6.62987e-30	1.64863e-27
Cs4g09440	4.08002	6.47505	9.96979e-30	2.44892e-27
Cs8g01240	1.75035	8.43306	1.02929e-29	2.49782e-27
Cs4g17630	2.15812	7.67076	1.08697e-29	2.60641e-27
Cs9g07830	-2.62811	6.74117	1.47344e-29	3.49152e-27
Cs6g15290	2.97527	9.06801	1.03696e-28	2.42866e-26
Cs3g18160	1.69369	7.21763	2.67093e-28	6.18366e-26
Cs2g09850	2.07118	6.29014	5.21564e-28	1.19379e-25
Cs4g09200	-2.30331	4.84663	9.88965e-28	2.23817e-25
Cs2g28610	-2.48268	4.79199	1.65449e-27	3.70274e-25
Cs1g20120	2.66037	4.64575	2.38533e-27	5.27971e-25
Cs3g16440	1.83337	7.19849	3.11024e-27	6.8094e-25
Cs1g22430	-2.28486	7.33951	6.62601e-27	1.43507e-24
Cs7g32340	1.94338	6.53074	1.07273e-26	2.29862e-24
Cs7g25640	-2.61485	4.66649	1.34444e-26	2.85049e-24
Cs1g26700	1.84636	8.62942	1.37321e-26	2.88116e-24
Cs7g03150	-1.65663	10.1364	1.44941e-26	3.00153e-24
Cs5g29860	2.09368	8.91908	1.46038e-26	3.00153e-24
Cs6g07400	4.8006	8.15949	2.68081e-26	5.45424e-24
Cs7g02500	-2.11766	5.32995	2.83061e-26	5.70142e-24
Cs7g02060	1.97144	5.32599	2.86999e-26	5.72351e-24
Cs5g02340	1.5387	9.28685	4.20345e-26	8.30057e-24
Cs3g22600	2.74825	4.14558	5.34637e-26	1.0455e-23
Cs8g19230	2.7598	4.21603	5.664e-26	1.09697e-23
Cs3g24860	2.36871	5.32322	7.45638e-26	1.43035e-23
Cs9g06620	2.19947	8.92911	8.38697e-26	1.59368e-23
Cs3g23680	2.26649	5.42887	8.69458e-26	1.63669e-23
Cs2g06510	1.96377	8.32004	9.04276e-26	1.68648e-23
Cs3g09800	-1.74261	5.8882	1.61096e-25	2.97688e-23
Cs4g18270	1.622	7.01389	1.82005e-25	3.33267e-23
Cs4g15880	1.90432	7.18205	2.03741e-25	3.69708e-23
Cs3g19060	3.96718	8.84687	2.17434e-25	3.91032e-23
Cs7g14940	2.99438	4.3301	2.51014e-25	4.47427e-23
Cs2g30390	1.71773	8.86914	2.62456e-25	4.63719e-23
Cs9g01760	2.01477	7.06977	2.67307e-25	4.68183e-23
Cs3g27810	3.57573	6.38168	3.06092e-25	5.31493e-23
Cs7g28380	2.21642	6.92633	3.92676e-25	6.76007e-23
Cs3g18280	2.27013	4.60346	4.94744e-25	8.44502e-23
Cs3g14770	1.58646	7.60633	5.11865e-25	8.66386e-23
Cs9g01410	2.27872	9.22339	6.00725e-25	1.00832e-22
Cs5g12250	1.75969	8.40124	1.04258e-24	1.73551e-22
orange1.1t04040	-2.0304	4.91931	1.99796e-24	3.29859e-22
Cs4g09780	2.47583	9.883	2.10104e-24	3.44058e-22
Cs2g27050	1.78609	8.20056	2.82346e-24	4.5863e-22
Cs3g15380	-1.52613	9.24996	2.8738e-24	4.63073e-22
Cs6g12050	1.75568	6.13611	4.03002e-24	6.44228e-22
Cs4g05930	-1.80361	5.65211	4.14475e-24	6.5735e-22
orange1.1t01969	1.58341	8.80747	4.2939e-24	6.75685e-22
Cs7g30250	2.01612	6.36454	4.60081e-24	7.18368e-22
Cs6g21850	1.72175	10.3958	4.95763e-24	7.68127e-22
Cs8g17450	1.73784	7.34234	5.2675e-24	8.09908e-22
Cs2g13450	-4.24096	3.55776	9.80438e-24	1.49606e-21
Cs6g20490	1.77462	8.10049	1.36494e-23	2.06712e-21
Cs1g04650	6.08647	2.98932	1.54716e-23	2.31767e-21
Cs8g05810	-2.04976	4.7035	1.5534e-23	2.31767e-21
Cs7g15030	-1.808	5.85993	2.08395e-23	3.08639e-21
orange1.1t05522	-3.08485	6.35883	3.56755e-23	5.24508e-21
Cs6g16900	-2.50452	5.64682	4.83204e-23	7.05268e-21
Cs6g07420	2.26726	8.08751	5.08051e-23	7.36199e-21
Cs7g17060	1.86393	7.34019	6.47557e-23	9.3165e-21
Cs9g18910	2.72438	3.68399	6.87172e-23	9.81633e-21
Cs5g33320	3.07806	3.90774	9.09969e-23	1.29075e-20
Cs9g04630	-3.43663	3.0084	1.10725e-22	1.5596e-20
Cs2g11590	1.57487	6.87641	1.28595e-22	1.79872e-20
Cs8g14690	-3.27089	3.1175	1.52233e-22	2.11467e-20
Cs4g18730	2.02793	8.26381	1.89326e-22	2.61193e-20
Cs8g19570	-2.37581	5.8634	1.99743e-22	2.73688e-20
Cs7g22250	1.5229	7.71965	2.02881e-22	2.76111e-20
Cs7g32220	1.79138	10.3976	2.06756e-22	2.79496e-20
Cs2g17100	-2.8256	3.67581	2.39457e-22	3.21543e-20
Cs2g09450	2.05595	6.48434	3.14261e-22	4.19196e-20
Cs2g27100	-3.27946	3.70011	3.52549e-22	4.65477e-20
Cs4g01450	1.6368	9.72031	3.5358e-22	4.65477e-20
Cs2g07460	2.47843	5.91001	3.64888e-22	4.77245e-20
Cs7g32300	1.45568	7.89584	4.27936e-22	5.56096e-20
Cs4g20430	1.72184	8.10597	4.75764e-22	6.14285e-20
Cs7g06330	2.84723	5.42707	4.98027e-22	6.38934e-20
Cs5g03870	1.59232	6.54336	5.21273e-22	6.64525e-20
Cs3g14420	2.06618	8.24777	5.85227e-22	7.41362e-20
Cs6g07370	1.95974	5.82406	7.45699e-22	9.38742e-20
Cs6g04230	-1.82011	4.86626	9.48235e-22	1.1863e-19
Cs7g22000	2.22524	8.0532	1.01447e-21	1.26133e-19
Cs1g22380	2.51641	3.92594	1.04404e-21	1.29012e-19
Cs2g07660	-2.69234	4.51708	1.33448e-21	1.63897e-19
Cs8g20480	-1.7995	5.37353	1.83648e-21	2.24185e-19
Cs7g06620	1.46515	6.84021	2.06047e-21	2.50012e-19
Cs4g12710	2.99497	4.34585	2.152e-21	2.59554e-19
Cs5g08520	1.501	9.10028	2.29407e-21	2.75042e-19
Cs2g01990	8.76569	3.66224	2.78411e-21	3.3182e-19
Cs1g24500	-1.92166	7.91741	3.24955e-21	3.85015e-19
Cs2g13700	4.10983	4.94872	3.46788e-21	4.0848e-19
Cs4g11440	2.2263	4.27089	3.89335e-21	4.55929e-19
Cs3g27760	1.3954	9.84039	4.93776e-21	5.74892e-19
Cs3g18410	1.76493	5.30657	6.72558e-21	7.78544e-19
Cs6g01310	1.74144	9.90872	7.88646e-21	9.07709e-19
Cs1g26530	-1.76149	5.67477	8.39416e-21	9.60654e-19
Cs1g24700	-2.28411	3.92594	8.91212e-21	1.01417e-18
Cs6g10660	3.0041	3.24	9.25525e-21	1.0473e-18
orange1.1t01648	-1.52792	5.80104	1.11379e-20	1.2533e-18
Cs9g17340	1.93326	7.8566	1.13792e-20	1.27333e-18
Cs9g13990	1.8061	5.78108	1.15443e-20	1.28206e-18
Cs6g16280	1.51218	6.38735	1.1597e-20	1.28206e-18
orange1.1t02551	1.40906	7.88492	1.16871e-20	1.28206e-18
Cs4g18310	-1.88845	6.48418	1.17118e-20	1.28206e-18
Cs4g02910	1.79295	6.82642	1.18489e-20	1.29006e-18
Cs3g01530	1.50887	8.56381	1.227e-20	1.32872e-18
Cs6g09510	1.46584	6.44567	1.65388e-20	1.78142e-18
Cs3g01820	1.44179	6.45633	1.66309e-20	1.78181e-18
Cs8g18120	-1.91823	7.32523	2.02605e-20	2.1592e-18
Cs3g23310	1.44955	7.71076	2.20556e-20	2.33812e-18
Cs3g09720	2.53342	5.25629	2.46309e-20	2.59747e-18
Cs3g18760	1.88282	5.49218	2.98099e-20	3.12724e-18
Cs1g12520	-3.26423	2.77595	2.99683e-20	3.12757e-18
Cs7g19800	1.30722	10.9654	4.01272e-20	4.1662e-18
Cs5g10280	3.30316	3.32795	4.17962e-20	4.31723e-18
Cs6g07670	2.10219	6.71646	4.48885e-20	4.61298e-18
orange1.1t02241	1.48733	9.90243	4.77245e-20	4.8596e-18
Cs4g05380	-1.64665	8.42623	4.77709e-20	4.8596e-18
Cs7g02010	2.33739	7.10735	4.88948e-20	4.94894e-18
Cs3g17300	-3.0017	3.04118	5.22912e-20	5.26625e-18
Cs1g04870	1.86772	9.0206	5.47698e-20	5.48843e-18
orange1.1t00436	1.63725	7.85918	5.84162e-20	5.82484e-18
Cs3g14440	-1.74646	8.54486	6.11689e-20	6.06928e-18
Cs4g17120	1.33219	7.66022	7.51263e-20	7.41762e-18
Cs3g17670	1.65777	5.97421	7.60428e-20	7.44502e-18
Cs5g32300	3.29639	4.1998	7.6143e-20	7.44502e-18
Cs3g21105	2.18975	6.26074	8.32863e-20	8.10412e-18
Cs1g26050	1.45758	7.32786	9.01494e-20	8.72975e-18
orange1.1t04983	-2.99007	3.87369	9.06063e-20	8.73202e-18
Cs8g04490	1.53128	6.66452	1.0955e-19	1.05074e-17
Cs6g08950	1.59275	7.21755	1.13206e-19	1.08066e-17
Cs5g24500	1.36589	8.01494	1.29604e-19	1.23136e-17
Cs6g19210	1.32288	8.47462	1.33989e-19	1.26704e-17
Cs5g09880	1.36921	10.3977	1.61808e-19	1.52296e-17
orange1.1t01911	-1.69924	6.14824	1.73748e-19	1.62774e-17
Cs6g15770	3.90593	2.33319	1.98368e-19	1.84978e-17
Cs3g05360	-1.87612	4.35959	2.01654e-19	1.87175e-17
Cs5g13540	2.36339	5.80951	2.16956e-19	2.00456e-17
orange1.1t00851	1.53916	5.52766	2.20718e-19	2.03e-17
Cs5g11310	2.86496	6.02541	2.30789e-19	2.11298e-17
Cs8g17160	2.00346	7.6956	2.63779e-19	2.40409e-17
Cs9g02530	1.54104	8.22154	3.25434e-19	2.95265e-17
Cs1g26190	-1.70637	8.22775	3.31442e-19	2.99368e-17
Cs2g04260	1.56817	6.9997	4.32785e-19	3.89159e-17
orange1.1t03682	1.3434	7.02008	4.58591e-19	4.10531e-17
Cs4g06820	1.33187	8.18008	5.25766e-19	4.68583e-17
Cs5g09800	2.01531	4.26582	5.4798e-19	4.84444e-17
Cs2g11750	1.9687	6.18981	5.48373e-19	4.84444e-17
Cs3g11290	3.22719	4.4339	5.59598e-19	4.92202e-17
Cs3g07120	1.35963	7.14342	5.77194e-19	5.05472e-17
orange1.1t05347	2.35938	4.56773	5.83455e-19	5.08742e-17
Cs7g15020	1.60924	6.31611	5.90713e-19	5.12851e-17
Cs2g07800	1.5064	5.63944	6.70618e-19	5.79725e-17
Cs4g11370	-2.09981	4.29072	6.96249e-19	5.9931e-17
Cs3g22270	1.49291	6.31116	7.66213e-19	6.56726e-17
Cs4g06880	1.64675	7.77867	8.32081e-19	7.1016e-17
Cs1g22770	1.43487	6.19457	9.3852e-19	7.97624e-17
Cs2g19860	1.47994	5.81948	1.03547e-18	8.76323e-17
Cs5g28400	3.89738	5.49724	1.15647e-18	9.74624e-17
Cs9g17800	-3.48543	3.41368	1.21126e-18	1.01655e-16
Cs1g19300	1.52603	5.74539	1.44801e-18	1.2102e-16
orange1.1t00580	1.54339	8.06598	1.80878e-18	1.50547e-16
Cs8g02170	1.94521	5.62268	1.95085e-18	1.61704e-16
Cs4g09270	1.99588	6.9986	2.05821e-18	1.69904e-16
Cs7g08400	1.55275	6.68604	2.13019e-18	1.75127e-16
Cs1g01910	-2.33263	4.37425	2.33315e-18	1.91034e-16
Cs6g13890	2.41742	3.79542	2.40427e-18	1.9606e-16
Cs8g05460	-2.6425	3.56199	2.50171e-18	2.03184e-16
Cs1g23640	1.98413	7.26574	2.53575e-18	2.05121e-16
Cs1g17380	2.05494	8.36719	2.73096e-18	2.20028e-16
orange1.1t04045	1.87732	5.19571	2.90525e-18	2.33138e-16
Cs1g09030	1.30499	7.74019	2.93475e-18	2.3457e-16
Cs4g02730	1.75928	6.68988	3.04715e-18	2.42592e-16
Cs6g20340	1.73739	5.27027	3.11186e-18	2.46768e-16
Cs7g15940	1.40186	6.82754	3.17682e-18	2.50931e-16
Cs6g15880	2.36535	6.82981	3.20183e-18	2.51919e-16
Cs6g10180	1.368	7.0001	3.22931e-18	2.53092e-16
Cs1g18220	2.62326	7.82145	3.63711e-18	2.83948e-16
Cs7g08730	-2.4216	3.80664	3.7799e-18	2.93956e-16
Cs2g10980	-1.55654	5.74222	3.81233e-18	2.95338e-16
Cs6g11950	2.77203	7.39814	4.12172e-18	3.18083e-16
Cs4g03700	1.90276	8.60808	4.44094e-18	3.40206e-16
Cs5g34480	1.43874	5.94569	4.44218e-18	3.40206e-16
Cs9g08750	1.50875	7.65005	5.0471e-18	3.85071e-16
Cs5g05900	3.67704	2.63209	5.80873e-18	4.41507e-16
Cs7g25850	1.75683	6.91365	6.05513e-18	4.58506e-16
Cs4g07840	1.41938	7.9859	8.26924e-18	6.23817e-16
Cs1g19400	2.99203	3.718	8.54106e-18	6.41918e-16
Cs4g03510	1.50718	9.43711	9.23191e-18	6.91261e-16
Cs3g11590	2.41973	4.49121	9.3661e-18	6.98711e-16
Cs6g08600	1.4412	10.3274	1.0302e-17	7.63901e-16
Cs3g16430	2.66439	3.44591	1.03158e-17	7.63901e-16
Cs2g07390	1.46356	6.16593	1.0431e-17	7.69601e-16
Cs5g15130	-1.43841	6.59418	1.08751e-17	7.99439e-16
Cs9g05220	2.29676	4.73337	1.28333e-17	9.39958e-16
Cs3g21470	-1.88647	4.20857	1.33953e-17	9.77567e-16
Cs5g02940	2.26135	6.57679	1.40562e-17	1.02209e-15
Cs3g16030	1.38089	6.7191	1.64013e-17	1.18601e-15
Cs4g04300	1.29147	9.43254	1.6494e-17	1.18601e-15
Cs6g06570	-1.67304	5.60583	1.65104e-17	1.18601e-15
Cs4g15220	1.27801	8.14889	1.6546e-17	1.18601e-15
Cs9g08050	1.64448	6.34211	1.73793e-17	1.24133e-15
Cs5g11560	2.74443	3.95651	1.86423e-17	1.32683e-15
Cs4g05490	1.66514	9.79534	2.01725e-17	1.43069e-15
orange1.1t01626	1.41856	6.40574	2.04064e-17	1.44219e-15
Cs2g30300	1.63524	5.92203	2.10116e-17	1.47977e-15
Cs9g05020	-1.42308	5.77664	2.18676e-17	1.53469e-15
Cs9g18850	-2.17418	4.29349	2.3853e-17	1.66822e-15
Cs3g22990	-1.58091	5.92215	2.45083e-17	1.70812e-15
Cs4g13160	-1.92735	4.25397	2.64041e-17	1.8339e-15
Cs8g18530	1.87628	6.50332	2.70514e-17	1.8724e-15
Cs5g04110	1.40856	7.13563	2.8175e-17	1.9435e-15
Cs8g06820	1.60796	8.49136	3.44635e-17	2.36916e-15
Cs2g02790	1.79147	7.93149	3.4855e-17	2.38792e-15
Cs5g12300	-3.18195	4.23379	3.63028e-17	2.47868e-15
Cs6g05580	-2.16691	5.78477	3.74439e-17	2.54796e-15
orange1.1t03953	-1.65626	5.9161	3.82573e-17	2.59454e-15
orange1.1t03475	-1.68776	6.69754	4.64832e-17	3.14183e-15
orange1.1t02254	-1.34713	6.09682	4.90937e-17	3.30324e-15
Cs7g04150	1.64196	5.62257	4.91992e-17	3.30324e-15
Cs3g23380	1.86141	6.51554	5.00697e-17	3.35051e-15
Cs5g02790	-3.55622	2.22214	5.50468e-17	3.67136e-15
Cs5g31430	-2.02384	3.90402	5.78659e-17	3.84665e-15
Cs9g03570	-1.66188	7.59686	6.05901e-17	4.01449e-15
orange1.1t00156	-2.85849	2.8382	6.98385e-17	4.61209e-15
Cs2g11250	1.41027	5.86578	1.15089e-16	7.57556e-15
Cs4g11450	1.4619	5.3678	1.23045e-16	8.07288e-15
Cs1g01600	1.571	5.5833	1.24023e-16	8.11064e-15
orange1.1t02318	1.20369	7.90254	1.39332e-16	9.0823e-15
Cs5g01260	2.25178	7.07732	1.4003e-16	9.09834e-15
Cs8g02230	2.66489	2.84338	1.52086e-16	9.84992e-15
Cs6g18250	1.43688	7.6564	1.52746e-16	9.86093e-15
Cs1g21880	-1.67061	4.62738	1.60629e-16	1.03367e-14
Cs5g24430	-1.53458	5.56183	1.7362e-16	1.11371e-14
orange1.1t00247	-1.96053	4.00529	1.74848e-16	1.11803e-14
Cs6g15760	1.35435	7.02764	1.8486e-16	1.17616e-14
Cs9g14780	-1.48826	5.13316	1.85531e-16	1.17616e-14
Cs2g15270	-5.6993	2.07565	1.85691e-16	1.17616e-14
Cs6g08550	2.69091	4.32938	1.94611e-16	1.2288e-14
Cs3g02020	3.00111	3.53693	2.15193e-16	1.3545e-14
Cs3g15800	-1.52035	6.53668	2.4459e-16	1.53474e-14
Cs2g06860	1.22946	8.32732	2.48262e-16	1.55295e-14
orange1.1t01769	1.87786	7.52928	2.57624e-16	1.60652e-14
Cs3g23870	1.26176	7.45451	2.66204e-16	1.6549e-14
Cs1g03220	-1.67139	5.96502	3.03533e-16	1.88116e-14
Cs9g09740	2.21233	5.24763	3.29806e-16	2.03771e-14
Cs8g20130	5.4823	2.41008	3.43163e-16	2.11376e-14
Cs5g33170	-1.64479	4.62251	3.53429e-16	2.17036e-14
Cs3g18030	1.71875	9.90901	3.61471e-16	2.20922e-14
Cs4g05200	2.11147	6.58766	3.61952e-16	2.20922e-14
orange1.1t03831	-1.90288	3.8723	3.66398e-16	2.2296e-14
Cs9g17050	2.04463	5.0919	3.68681e-16	2.23674e-14
Cs8g02450	-1.43846	5.42506	3.77002e-16	2.28035e-14
Cs5g28140	1.40775	6.778	3.99092e-16	2.40674e-14
Cs1g24060	-1.8227	7.35216	4.16333e-16	2.50322e-14
Cs5g01990	-2.9014	2.7715	4.19811e-16	2.51662e-14
orange1.1t04233	-2.3497	4.31026	4.35789e-16	2.60465e-14
Cs2g28830	1.60107	6.25744	4.61482e-16	2.75005e-14
Cs7g29010	1.15524	10.9215	5.03777e-16	2.99324e-14
Cs9g16600	-2.27567	4.59911	5.86276e-16	3.47317e-14
Cs3g10930	-1.93309	4.69741	6.09265e-16	3.59877e-14
Cs3g25000	-2.58589	2.81173	6.5125e-16	3.83552e-14
Cs4g15280	1.81896	5.42454	6.56344e-16	3.85425e-14
Cs7g07200	-1.59234	5.69154	6.7163e-16	3.93255e-14
orange1.1t00261	-1.65882	4.60978	7.00078e-16	4.08724e-14
Cs2g13390	-1.45583	5.55463	7.2318e-16	4.20991e-14
Cs5g04350	1.32829	6.60656	7.32641e-16	4.2527e-14
Cs1g15390	-2.23486	3.43946	7.43037e-16	4.30064e-14
Cs3g01630	1.22381	7.73656	8.1844e-16	4.7235e-14
Cs3g27160	1.31861	6.62127	8.25659e-16	4.75155e-14
Cs6g19580	-1.72971	5.7699	8.43992e-16	4.84321e-14
Cs1g02750	1.86404	7.00319	8.98089e-16	5.13901e-14
orange1.1t01433	1.27393	7.75335	9.5976e-16	5.47634e-14
Cs8g09780	1.79069	8.7482	1.01892e-15	5.79747e-14
Cs6g07040	-1.6275	4.66702	1.06447e-15	6.03961e-14
Cs1g15970	2.04507	6.86234	1.0732e-15	6.07203e-14
Cs5g04290	-1.81455	4.71422	1.08683e-15	6.13193e-14
Cs2g27090	-4.78621	1.42395	1.10147e-15	6.19715e-14
Cs7g29780	-1.34156	7.51012	1.18453e-15	6.64592e-14
Cs1g20470	1.23021	8.68471	1.21896e-15	6.8201e-14
Cs6g05830	-1.2485	6.34826	1.41533e-15	7.88534e-14
Cs5g28950	1.1722	8.67807	1.41718e-15	7.88534e-14
orange1.1t01192	1.58986	5.3678	1.44925e-15	8.04156e-14
Cs4g17420	1.46989	5.15562	1.5065e-15	8.33625e-14
Cs8g05330	1.61478	5.63607	1.54547e-15	8.52845e-14
Cs7g08920	-1.62468	4.75702	1.59278e-15	8.75457e-14
Cs8g18010	-1.20853	7.88101	1.59514e-15	8.75457e-14
Cs3g23850	1.51513	9.33255	1.60029e-15	8.75896e-14
Cs2g19970	2.58351	4.92168	1.61119e-15	8.79472e-14
Cs6g02630	1.81012	4.32098	1.66993e-15	9.09075e-14
Cs6g02260	1.25094	6.83705	1.74152e-15	9.45489e-14
Cs3g25170	1.31116	6.31061	1.74698e-15	9.45906e-14
Cs5g10430	1.37551	6.01415	1.75199e-15	9.46073e-14
Cs5g05300	2.53156	4.17975	1.80615e-15	9.72716e-14
Cs4g09520	1.17892	7.20206	1.82508e-15	9.80285e-14
Cs2g21460	1.22694	9.04778	1.88378e-15	1.00679e-13
orange1.1t01124	2.18403	3.9918	1.88443e-15	1.00679e-13
Cs1g26810	1.90931	8.50657	1.89376e-15	1.0091e-13
Cs4g03900	1.23108	6.63107	1.91021e-15	1.01518e-13
Cs1g06300	1.3298	6.50927	1.96865e-15	1.04349e-13
orange1.1t03034	-1.68682	4.67182	2.20023e-15	1.16318e-13
Cs4g11830	-2.24227	3.3506	2.28356e-15	1.20407e-13
Cs2g08320	-1.1428	8.01717	2.29697e-15	1.20798e-13
Cs7g11130	1.90207	4.8332	2.31281e-15	1.21314e-13
Cs2g10580	1.20425	8.41655	2.41304e-15	1.26243e-13
Cs2g05280	1.43946	7.03857	2.44726e-15	1.27701e-13
Cs4g17095	-5.35061	1.22953	2.62135e-15	1.36432e-13
orange1.1t03941	-1.82556	4.28385	2.68441e-15	1.39354e-13
Cs8g01190	1.49773	5.02016	2.76141e-15	1.42983e-13
Cs2g14930	-1.69866	4.49342	2.85586e-15	1.47173e-13
Cs2g07010	-1.25885	6.00867	2.85695e-15	1.47173e-13
Cs6g15740	1.25108	8.55797	3.01747e-15	1.55046e-13
Cs3g01120	-2.35353	4.37029	3.0268e-15	1.55129e-13
Cs3g16060	-2.95111	2.91914	3.08756e-15	1.57842e-13
orange1.1t01707	1.56891	5.84554	3.20427e-15	1.63394e-13
Cs8g01940	-2.00444	5.26895	3.44717e-15	1.75336e-13
Cs6g21540	1.25503	10.1603	3.51259e-15	1.78213e-13
Cs2g06720	1.23801	5.93738	3.62163e-15	1.83284e-13
Cs8g01670	2.84076	6.40386	3.85056e-15	1.94381e-13
orange1.1t01398	-1.54681	4.69386	3.88956e-15	1.95859e-13
Cs8g14960	1.12801	10.6892	3.98605e-15	2.00217e-13
Cs1g23410	-2.75313	2.50821	4.83119e-15	2.41868e-13
Cs1g16590	-2.2621	3.81735	4.83928e-15	2.41868e-13
Cs4g05920	-2.54757	2.70845	5.09606e-15	2.54071e-13
Cs6g11080	-1.27407	5.78464	5.27197e-15	2.62193e-13
Cs2g01360	-2.51763	2.91891	5.75012e-15	2.85268e-13
Cs6g18360	5.67682	3.09753	6.26121e-15	3.09861e-13
Cs2g02390	-3.51636	2.4869	6.36728e-15	3.14338e-13
Cs2g13790	1.63083	5.07988	6.59585e-15	3.24825e-13
Cs1g17390	1.91798	5.47294	6.61201e-15	3.24827e-13
Cs2g28000	1.67398	6.95201	6.81703e-15	3.34084e-13
Cs1g24230	1.39046	6.65486	6.87468e-15	3.36092e-13
Cs1g25830	-1.96036	4.45364	7.11148e-15	3.46794e-13
Cs4g13020	-1.86273	4.84752	7.12803e-15	3.46794e-13
Cs1g19830	1.946	8.95299	7.30695e-15	3.54642e-13
Cs3g15980	1.26916	6.2925	7.3464e-15	3.557e-13
Cs9g13610	-1.74701	4.79078	8.05295e-15	3.88308e-13
Cs7g26940	1.30159	5.84394	8.06518e-15	3.88308e-13
Cs4g18740	1.78826	7.91277	8.0777e-15	3.88308e-13
Cs5g06360	-1.58642	4.51023	8.3362e-15	3.9978e-13
Cs1g11430	1.51437	4.74719	8.92327e-15	4.26918e-13
Cs2g10910	-8.90136	1.20615	9.09583e-15	4.34143e-13
orange1.1t01865	1.65024	4.88124	9.50553e-15	4.52625e-13
Cs2g15260	-6.81017	1.0123	9.55451e-15	4.53884e-13
Cs3g24380	1.5802	6.40613	9.6444e-15	4.57076e-13
Cs7g07640	2.89869	8.46533	9.82314e-15	4.64455e-13
Cs5g08340	1.31031	5.53629	9.89299e-15	4.66662e-13
Cs7g13800	-1.19649	6.26211	9.93028e-15	4.67326e-13
Cs8g13600	-5.71051	0.737421	1.02152e-14	4.79614e-13
Cs1g23600	2.40759	4.1446	1.10327e-14	5.16793e-13
Cs9g01390	-1.95251	4.64337	1.1098e-14	5.18644e-13
Cs3g16150	-1.38352	5.71598	1.11731e-14	5.20947e-13
Cs7g04160	3.18105	3.07955	1.13755e-14	5.28786e-13
Cs2g04490	1.57471	6.08315	1.13938e-14	5.28786e-13
Cs4g13600	1.4529	5.16126	1.14729e-14	5.31233e-13
Cs9g08460	3.31826	3.43319	1.16928e-14	5.40173e-13
Cs5g08010	1.21945	7.48946	1.18599e-14	5.4664e-13
Cs5g11450	1.21022	6.27266	1.19016e-14	5.47311e-13
Cs5g14010	-1.52112	5.20949	1.19683e-14	5.49124e-13
Cs4g09550	-1.44899	6.83405	1.27911e-14	5.85541e-13
Cs8g19110	4.42656	4.18464	1.39753e-14	6.383e-13
Cs7g09100	1.23816	7.82361	1.4335e-14	6.53248e-13
orange1.1t00309	1.15144	8.18454	1.44153e-14	6.55426e-13
Cs7g02900	1.49147	6.19319	1.45416e-14	6.5968e-13
Cs3g15390	-1.51429	7.2337	1.48846e-14	6.73721e-13
Cs8g12370	2.33591	5.22668	1.51978e-14	6.86354e-13
Cs8g02840	1.46336	8.33823	1.52519e-14	6.87257e-13
Cs5g17880	1.73863	5.42902	1.5683e-14	7.05105e-13
Cs4g04050	1.19822	7.66777	1.58613e-14	7.11532e-13
Cs5g25740	2.11813	4.84968	1.69448e-14	7.58448e-13
orange1.1t02388	-1.18511	7.32201	1.71901e-14	7.67722e-13
Cs8g20570	-2.10508	4.1781	1.73603e-14	7.73608e-13
Cs9g01260	1.41991	6.02386	1.76695e-14	7.84812e-13
Cs3g16650	2.1923	3.47599	1.76896e-14	7.84812e-13
Cs5g11630	1.35287	7.43207	1.78311e-14	7.8935e-13
Cs3g24180	-1.93252	4.17197	1.79968e-14	7.94939e-13
Cs4g09140	1.29887	7.08629	1.8262e-14	8.04888e-13
Cs4g02530	2.43595	4.38869	1.95622e-14	8.60312e-13
Cs1g21830	2.77192	4.6303	2.29759e-14	1.00824e-12
Cs1g07040	-2.41791	3.02413	2.35021e-14	1.02909e-12
Cs4g18290	4.27374	1.2874	2.46842e-14	1.07686e-12
Cs7g19290	1.14143	8.59745	2.47e-14	1.07686e-12
Cs7g31740	-1.32957	6.42151	2.50241e-14	1.08863e-12
Cs5g12540	1.17995	6.76419	2.57854e-14	1.11933e-12
Cs3g08530	-2.59922	2.59769	2.87965e-14	1.24735e-12
orange1.1t03463	1.16019	6.19618	3.04746e-14	1.31721e-12
Cs7g04050	1.31273	7.4406	3.07105e-14	1.32456e-12
Cs8g06750	-1.52288	6.66064	3.20814e-14	1.38073e-12
Cs6g10670	1.16748	6.62066	3.36714e-14	1.44608e-12
orange1.1t00051	1.78891	5.02726	3.76616e-14	1.614e-12
Cs9g09450	2.37839	3.99608	3.77485e-14	1.61429e-12
Cs7g04100	1.35728	6.56677	3.96474e-14	1.6919e-12
Cs9g07750	1.81047	9.40748	4.05031e-14	1.72476e-12
Cs3g25380	1.32556	5.50435	4.17325e-14	1.77337e-12
Cs5g29580	1.39619	6.52546	4.86918e-14	2.06474e-12
Cs5g03440	-1.51726	8.30933	5.01201e-14	2.12084e-12
Cs5g14020	1.20303	7.19002	5.15799e-14	2.17803e-12
Cs2g12130	1.59069	7.32539	5.41459e-14	2.2816e-12
Cs3g23490	-1.76027	4.81486	5.86575e-14	2.46655e-12
Cs9g06580	1.13145	7.456	6.54751e-14	2.7475e-12
Cs2g05560	-2.55964	5.04121	6.65755e-14	2.78335e-12
Cs3g05770	1.93261	3.74131	6.66059e-14	2.78335e-12
Cs7g18840	1.18232	6.99578	7.02766e-14	2.93067e-12
Cs1g06440	-2.22352	3.12493	7.12217e-14	2.96394e-12
Cs9g06270	-1.29411	9.53933	7.28768e-14	3.02657e-12
Cs1g13520	1.3246	7.75635	7.56799e-14	3.13651e-12
orange1.1t04648	1.14884	7.31229	7.64408e-14	3.16154e-12
Cs6g21840	3.10696	3.54548	8.43538e-14	3.48167e-12
Cs7g12610	-6.0892	2.4483	8.65105e-14	3.56338e-12
Cs7g15060	1.18698	6.83184	8.68437e-14	3.56981e-12
Cs3g12210	1.44547	5.81819	9.09505e-14	3.72461e-12
Cs5g23640	-1.57918	4.59116	9.09795e-14	3.72461e-12
Cs1g26610	1.25698	7.96671	9.74172e-14	3.98008e-12
Cs4g02970	-2.47427	3.6275	9.86871e-14	4.0238e-12
Cs6g10610	1.80563	5.59674	1.0242e-13	4.16755e-12
Cs7g07990	1.30682	5.46163	1.12934e-13	4.58613e-12
Cs7g28070	1.19215	6.94408	1.15348e-13	4.67473e-12
Cs2g12850	1.48109	5.54307	1.21483e-13	4.91348e-12
Cs2g02040	1.34232	5.56017	1.2256e-13	4.9471e-12
orange1.1t04856	1.53133	4.58475	1.22933e-13	4.95224e-12
Cs7g18350	1.14831	8.96125	1.3091e-13	5.26304e-12
Cs9g07160	-2.52101	3.6679	1.32778e-13	5.32753e-12
Cs3g16780	1.32045	7.96217	1.35209e-13	5.41426e-12
Cs1g04910	-1.91079	6.4621	1.47281e-13	5.88599e-12
Cs5g26660	-1.7608	3.90187	1.49497e-13	5.96269e-12
Cs9g13450	-1.89256	3.74674	1.58732e-13	6.31855e-12
Cs4g09690	-1.57631	4.31643	1.64986e-13	6.55452e-12
Cs3g13780	1.20929	5.93458	1.76782e-13	7.00935e-12
orange1.1t02337	1.13143	7.28726	2.01811e-13	7.98601e-12
Cs7g22420	-2.02598	4.07775	2.07162e-13	8.17874e-12
Cs4g03750	-1.20124	5.74537	2.07493e-13	8.17874e-12
Cs2g03560	-1.8514	3.87676	2.17147e-13	8.54252e-12
Cs3g21510	-1.67651	4.83015	2.21159e-13	8.68342e-12
orange1.1t01622	1.51382	8.59559	2.35973e-13	9.24703e-12
Cs5g01300	1.0863	7.18007	2.36665e-13	9.25615e-12
Cs1g15730	1.48099	7.39272	2.38296e-13	9.30187e-12
Cs4g17200	1.28825	5.47031	2.41633e-13	9.41389e-12
Cs4g18480	-2.77467	3.29824	2.4579e-13	9.55734e-12
Cs7g24030	1.09809	7.52443	2.46431e-13	9.5629e-12
Cs7g02820	1.96919	7.82277	2.46883e-13	9.5629e-12
Cs2g30380	1.34918	8.03855	2.50756e-13	9.69431e-12
Cs8g16540	-1.47858	7.08005	2.52896e-13	9.7583e-12
orange1.1t01956	-2.22405	3.78632	2.66457e-13	1.02619e-11
Cs6g08610	2.96519	3.23972	2.8314e-13	1.08836e-11
Cs2g21000	1.7752	8.87296	2.86947e-13	1.10028e-11
Cs4g20410	-1.96491	3.54964	2.87334e-13	1.10028e-11
Cs3g27850	1.27654	6.73743	2.92521e-13	1.11802e-11
Cs7g31975	-1.70188	4.00742	2.97423e-13	1.13308e-11
Cs9g10160	-1.21368	5.89475	2.97588e-13	1.13308e-11
orange1.1t00369	1.12451	6.91938	3.02775e-13	1.15066e-11
Cs9g05750	1.17212	6.2528	3.12018e-13	1.18355e-11
orange1.1t04270	1.76417	4.04593	3.30058e-13	1.24963e-11
orange1.1t04132	1.99185	5.99198	3.58284e-13	1.35395e-11
Cs2g06990	4.64427	2.90509	3.63441e-13	1.37087e-11
Cs3g27880	-1.73777	3.98348	3.69099e-13	1.3896e-11
Cs7g27200	-2.17256	3.88746	3.83746e-13	1.44205e-11
Cs1g18720	1.1866	7.14681	3.9115e-13	1.46714e-11
Cs9g02090	1.14887	7.9012	3.96558e-13	1.48384e-11
Cs4g02130	1.27251	6.09546	3.9733e-13	1.48384e-11
Cs4g16020	-2.63413	3.17848	3.97812e-13	1.48384e-11
Cs6g15870	1.15913	7.23381	4.15944e-13	1.5486e-11
Cs7g02050	2.7697	3.48856	4.72944e-13	1.75757e-11
orange1.1t00270	-1.87152	3.72412	4.74103e-13	1.75863e-11
Cs5g09390	1.20228	8.7355	4.75911e-13	1.76209e-11
Cs6g09960	1.21752	11.6093	5.0911e-13	1.88156e-11
Cs4g03600	-3.6931	1.76406	5.32556e-13	1.9646e-11
Cs2g27870	1.03398	8.32668	5.52422e-13	2.03417e-11
Cs7g16020	1.6582	6.28041	5.54348e-13	2.03753e-11
Cs3g18010	1.08944	6.51925	5.56788e-13	2.04277e-11
Cs9g17960	1.13423	7.26066	5.75033e-13	2.10588e-11
Cs5g04340	1.40573	6.51632	6.01326e-13	2.19817e-11
Cs5g14540	-1.89271	3.81278	6.05037e-13	2.20773e-11
Cs3g25180	-1.22645	5.71507	6.3162e-13	2.30056e-11
Cs8g14110	-1.31662	5.47506	6.35066e-13	2.30893e-11
Cs8g18260	-1.25902	9.23503	6.36676e-13	2.31062e-11
Cs1g13320	2.11099	3.77104	6.40605e-13	2.3207e-11
Cs5g03580	-3.48403	1.42994	6.49372e-13	2.34823e-11
Cs5g05050	-1.31199	7.01341	6.59266e-13	2.37974e-11
Cs7g19490	1.1949	6.0488	6.68156e-13	2.40751e-11
Cs1g14920	2.3919	4.34424	6.69544e-13	2.40821e-11
orange1.1t00211	2.00006	4.42898	6.77454e-13	2.43232e-11
Cs1g17290	-1.41511	5.02568	6.90542e-13	2.47489e-11
Cs2g09590	1.14547	6.07091	6.94878e-13	2.48601e-11
Cs3g03130	4.37334	4.55929	7.19428e-13	2.56928e-11
Cs7g06310	-1.35035	6.47229	7.387e-13	2.63343e-11
Cs3g11280	1.65098	4.18734	7.75463e-13	2.75961e-11
Cs8g16750	1.12338	8.14649	7.79689e-13	2.76975e-11
Cs5g26470	-2.51333	2.85149	8.01736e-13	2.84235e-11
Cs5g13300	1.26897	7.04386	8.02948e-13	2.84235e-11
orange1.1t00535	1.19675	6.64194	8.21827e-13	2.90408e-11
Cs6g09710	-3.48464	2.29458	8.29632e-13	2.92652e-11
Cs8g12690	1.3503	7.97593	8.57711e-13	3.02028e-11
Cs5g22710	-1.64381	4.23993	8.75391e-13	3.07222e-11
Cs7g10580	-1.43191	5.35085	8.75512e-13	3.07222e-11
Cs2g15710	-1.23811	6.69144	8.81779e-13	3.08884e-11
Cs9g08480	-2.20096	3.42978	9.18611e-13	3.21227e-11
Cs5g15780	-1.70946	4.00414	9.45531e-13	3.30067e-11
Cs2g03950	-2.59053	3.02589	9.75139e-13	3.39814e-11
Cs7g09390	-1.53595	5.15491	1.00325e-12	3.49005e-11
Cs3g13770	1.17675	7.00635	1.02026e-12	3.54312e-11
Cs1g26210	-2.07298	4.09442	1.03961e-12	3.6041e-11
Cs2g03920	-1.53714	4.89962	1.05327e-12	3.64518e-11
Cs5g28330	-2.26949	4.68755	1.14395e-12	3.95224e-11
Cs2g16135	1.16378	6.1391	1.18469e-12	4.08598e-11
Cs5g02140	1.12798	8.06781	1.22056e-12	4.20161e-11
Cs1g14130	-1.36453	5.53529	1.22239e-12	4.20161e-11
Cs8g17830	-1.97132	4.99381	1.26872e-12	4.35341e-11
Cs2g04430	1.32288	6.24695	1.36017e-12	4.65926e-11
Cs9g06630	1.10831	9.08133	1.37848e-12	4.71397e-11
orange1.1t02977	1.99751	4.45905	1.39857e-12	4.77457e-11
Cs6g13710	-1.28023	5.39481	1.45695e-12	4.96545e-11
Cs4g17910	-1.26394	5.66256	1.52251e-12	5.18012e-11
Cs6g05990	2.24168	5.1729	1.63232e-12	5.54083e-11
Cs2g25520	-1.23234	5.58919	1.63402e-12	5.54083e-11
Cs6g17110	-2.0795	3.1288	1.72074e-12	5.82507e-11
orange1.1t02547	-2.02597	5.80192	1.74098e-12	5.88206e-11
Cs1g04070	-1.41762	4.70586	1.74342e-12	5.88206e-11
Cs2g01290	1.11237	6.31097	1.74769e-12	5.8866e-11
Cs7g08390	1.5935	4.691	1.82574e-12	6.13924e-11
Cs9g09180	1.35637	5.14181	1.84298e-12	6.18688e-11
Cs6g15590	2.66954	3.50926	1.85251e-12	6.20851e-11
Cs5g29830	3.05034	5.66093	1.91904e-12	6.42081e-11
Cs5g27920	1.41465	4.73826	2.03407e-12	6.7944e-11
Cs3g27390	-1.37137	6.21876	2.05638e-12	6.85756e-11
Cs4g11250	4.55329	1.6793	2.07198e-12	6.89817e-11
Cs6g10950	-1.58094	4.4469	2.07943e-12	6.91153e-11
Cs7g02380	1.76942	3.8723	2.25262e-12	7.47485e-11
Cs4g08560	-1.88263	3.63756	2.32355e-12	7.69753e-11
Cs8g15910	1.09278	9.197	2.72884e-12	9.02534e-11
Cs3g03110	1.35113	6.17894	2.80082e-12	9.24822e-11
orange1.1t01434	1.73075	3.92494	2.86725e-12	9.45207e-11
Cs4g12750	1.09723	5.83515	2.94462e-12	9.69127e-11
Cs6g08840	1.44959	9.71013	2.97654e-12	9.78033e-11
Cs3g15630	1.20024	5.88269	3.03542e-12	9.95757e-11
Cs8g09090	1.60541	6.81241	3.07305e-12	1.00646e-10
Cs9g04120	4.60659	1.06325	3.10813e-12	1.0163e-10
Cs3g24780	-1.53973	4.07595	3.12369e-12	1.01973e-10
orange1.1t02832	-1.36182	4.72105	3.29912e-12	1.07526e-10
Cs4g01970	1.04499	8.72005	3.42859e-12	1.11565e-10
Cs1g24030	-2.3642	3.2058	3.58359e-12	1.16282e-10
Cs1g08280	1.69215	6.34476	3.5851e-12	1.16282e-10
Cs5g12050	1.01975	7.2059	3.59284e-12	1.16346e-10
Cs4g04380	-2.00406	3.38546	3.75538e-12	1.21414e-10
Cs3g12230	1.86075	6.67514	3.79548e-12	1.22514e-10
Cs3g18470	1.20499	7.75974	3.87542e-12	1.24894e-10
Cs4g08850	-2.64862	3.14852	3.95714e-12	1.27324e-10
Cs2g24960	-1.93039	3.73931	4.02949e-12	1.29445e-10
Cs4g15970	1.21424	5.61632	4.10423e-12	1.31636e-10
Cs3g16610	1.46775	6.15016	4.1301e-12	1.32146e-10
orange1.1t03827	-4.03062	1.83447	4.13325e-12	1.32146e-10
Cs1g12650	-1.59298	5.14706	4.47647e-12	1.42892e-10
Cs2g06320	1.28251	5.77671	4.54529e-12	1.44859e-10
Cs7g04490	-1.07149	7.62455	4.5737e-12	1.45535e-10
orange1.1t03470	1.11526	9.48387	4.60502e-12	1.463e-10
Cs2g18560	-1.16098	5.74608	4.7299e-12	1.50031e-10
Cs8g17300	1.08923	6.52275	5.10631e-12	1.61716e-10
Cs7g28370	1.35281	8.53419	5.12515e-12	1.62058e-10
Cs4g04260	-1.25218	5.46462	5.21077e-12	1.64254e-10
Cs3g16480	1.51384	4.88475	5.21104e-12	1.64254e-10
Cs1g20580	1.08754	11.9911	5.21906e-12	1.64254e-10
Cs2g29300	1.15256	6.25518	5.39239e-12	1.69444e-10
Cs2g02610	-1.65481	3.9349	5.95008e-12	1.86677e-10
Cs5g04080	1.49579	4.85393	6.20956e-12	1.94515e-10
Cs2g10570	1.26464	7.50838	6.2358e-12	1.95033e-10
Cs9g10520	-1.4878	7.53842	6.29309e-12	1.9652e-10
Cs3g19560	1.13652	7.05587	6.5784e-12	2.05112e-10
orange1.1t03228	1.13623	7.06361	6.95706e-12	2.16583e-10
Cs7g08690	2.2274	2.75583	7.0961e-12	2.2057e-10
Cs7g27420	1.08594	6.02188	7.25982e-12	2.25312e-10
Cs8g20880	1.04946	6.13305	7.55867e-12	2.34178e-10
Cs3g02680	1.00262	7.37472	7.56875e-12	2.34178e-10
Cs3g03980	1.12352	6.37856	7.83543e-12	2.42057e-10
orange1.1t00221	-1.37922	5.40445	8.01831e-12	2.47327e-10
Cs1g21600	-1.47361	5.38162	8.07788e-12	2.48784e-10
Cs6g15560	-2.15406	5.08304	8.10259e-12	2.49164e-10
Cs4g02800	1.13728	8.52502	8.37654e-12	2.57196e-10
orange1.1t01089	1.19677	6.20169	8.69442e-12	2.66549e-10
Cs1g06910	1.52433	5.67496	8.71206e-12	2.66684e-10
Cs6g13590	1.24573	6.60863	9.05643e-12	2.76805e-10
Cs3g13860	-1.31086	5.23362	9.59328e-12	2.92769e-10
Cs2g12100	-1.0428	7.66196	9.72718e-12	2.96407e-10
Cs5g02520	1.60953	4.60266	1.08396e-11	3.29807e-10
Cs5g29350	1.10118	5.60672	1.12201e-11	3.40816e-10
Cs6g19180	2.28042	4.89101	1.12353e-11	3.40816e-10
Cs3g11620	1.83885	3.74786	1.13112e-11	3.42602e-10
Cs5g09600	-3.9775	1.1605	1.19642e-11	3.61837e-10
Cs7g09080	-2.30443	2.91746	1.28476e-11	3.8797e-10
Cs1g20150	2.29285	7.45356	1.33684e-11	4.03093e-10
orange1.1t01827	1.33299	4.86576	1.42426e-11	4.2881e-10
Cs9g18600	1.25246	7.88337	1.44823e-11	4.35376e-10
Cs2g17390	-2.36618	2.36376	1.48274e-11	4.45086e-10
orange1.1t06054	1.62263	4.18148	1.49886e-11	4.49256e-10
Cs2g25150	1.18688	6.85689	1.5814e-11	4.73291e-10
Cs5g09370	1.458	6.2056	1.59979e-11	4.78085e-10
Cs8g19420	-2.84519	1.93793	1.63072e-11	4.86606e-10
Cs9g14590	3.10461	3.3767	1.75947e-11	5.2425e-10
Cs7g28710	-1.38531	4.98079	1.77528e-11	5.28177e-10
orange1.1t00466	1.1593	7.00601	1.807e-11	5.36824e-10
Cs7g32520	1.72899	5.76447	1.81178e-11	5.37452e-10
Cs2g24290	1.6527	6.89602	1.83965e-11	5.44914e-10
Cs1g13960	-1.35233	6.67715	1.90465e-11	5.6334e-10
Cs2g17570	-2.15958	4.1802	1.92908e-11	5.69728e-10
orange1.1t00643	-2.51252	3.70649	1.95018e-11	5.75118e-10
Cs1g08600	1.66503	4.01165	1.96488e-11	5.78606e-10
Cs2g18210	1.9736	2.96001	1.9886e-11	5.84737e-10
Cs4g16000	-1.80298	4.68081	2.00998e-11	5.90159e-10
Cs6g08500	2.25723	4.52546	2.04368e-11	5.99182e-10
Cs1g18290	1.60048	4.31024	2.11446e-11	6.19033e-10
Cs1g18200	1.73653	4.68766	2.20946e-11	6.45907e-10
Cs1g16670	-2.39409	3.08408	2.2721e-11	6.63255e-10
Cs1g20230	-2.02307	3.28787	2.34258e-11	6.82841e-10
Cs7g24680	-1.36847	6.05446	2.54873e-11	7.41859e-10
Cs5g10550	1.47584	9.70681	2.58381e-11	7.50984e-10
orange1.1t00308	-1.30822	5.58239	2.58961e-11	7.51584e-10
orange1.1t03286	-3.31983	1.50598	2.66325e-11	7.71845e-10
Cs2g30260	1.061	8.23686	2.68396e-11	7.7673e-10
Cs3g24610	1.13469	5.32591	2.6893e-11	7.77157e-10
Cs8g19840	1.92417	7.02146	2.70317e-11	7.80046e-10
orange1.1t02260	-4.86265	1.06396	2.70892e-11	7.80588e-10
Cs3g07810	-1.21313	5.60974	2.79393e-11	8.03933e-10
Cs5g24040	-1.13983	7.14669	2.85936e-11	8.21587e-10
Cs3g25410	1.78232	4.81363	2.86631e-11	8.22411e-10
Cs2g18170	-1.40615	5.75517	2.87931e-11	8.24966e-10
Cs6g17190	-2.7994	2.52407	2.89866e-11	8.29329e-10
Cs6g21740	1.13587	6.00763	2.94315e-11	8.40864e-10
Cs2g15300	-1.13791	5.30719	3.00908e-11	8.58482e-10
Cs9g05170	2.16022	3.55234	3.09437e-11	8.81567e-10
Cs2g19930	1.55032	7.61577	3.21407e-11	9.14084e-10
Cs7g31240	2.49288	5.14742	3.21758e-11	9.14084e-10
Cs3g21180	1.20593	5.33715	3.23478e-11	9.17674e-10
Cs9g11850	1.29574	7.41602	3.29258e-11	9.32759e-10
Cs6g20230	-2.03166	3.08046	3.35426e-11	9.47566e-10
Cs7g13500	1.82448	5.81658	3.43315e-11	9.68495e-10
Cs1g16750	1.46373	5.4245	3.74215e-11	1.05419e-09
Cs3g27320	2.58318	5.07891	3.74885e-11	1.0546e-09
Cs1g21740	1.82429	6.29901	3.86518e-11	1.08581e-09
Cs2g17950	1.00108	8.52008	3.98177e-11	1.117e-09
Cs4g04990	-4.12668	0.640199	4.13688e-11	1.15729e-09
orange1.1t02122	-2.0752	3.44255	4.32849e-11	1.20921e-09
Cs7g04670	1.21863	6.38406	4.73669e-11	1.32142e-09
Cs3g18540	1.35932	5.86857	4.75657e-11	1.32513e-09
Cs5g23840	-3.62199	3.61651	4.86199e-11	1.35263e-09
Cs9g13790	1.40774	6.2549	4.93256e-11	1.37037e-09
Cs8g17360	1.46373	6.93178	4.99065e-11	1.3846e-09
Cs5g01720	-1.72541	3.6304	5.03677e-11	1.39547e-09
Cs5g07570	1.75476	4.43151	5.12592e-11	1.41627e-09
orange1.1t05715	1.75481	6.51521	5.18179e-11	1.42975e-09
Cs5g05010	-2.06717	2.67058	5.37624e-11	1.48137e-09
Cs4g10250	-1.86432	3.52101	5.39593e-11	1.48477e-09
orange1.1t03175	3.50434	3.26079	5.53768e-11	1.52169e-09
Cs5g31960	-1.5932	3.93958	5.60444e-11	1.53794e-09
Cs7g26410	-1.52006	8.67875	6.18821e-11	1.69582e-09
orange1.1t02000	-1.06963	6.28026	6.22991e-11	1.70493e-09
Cs2g04390	-1.43652	4.81705	6.3804e-11	1.74374e-09
Cs8g03700	1.58894	3.68825	6.52755e-11	1.78154e-09
Cs6g17040	-1.03864	7.14142	6.81689e-11	1.858e-09
orange1.1t03161	-1.15264	6.20226	6.89763e-11	1.87746e-09
Cs4g13640	-2.39349	3.32019	7.49625e-11	2.03765e-09
Cs3g04800	1.44427	4.52835	7.57524e-11	2.05634e-09
Cs2g04900	-1.81136	3.44467	7.62186e-11	2.06621e-09
Cs3g17010	1.03032	7.13444	7.77631e-11	2.10242e-09
Cs2g04300	1.35833	5.31562	8.01265e-11	2.16342e-09
Cs5g07400	1.34077	7.23077	8.24357e-11	2.22278e-09
Cs7g29300	-1.57941	4.3605	8.52557e-11	2.29575e-09
Cs4g15260	-3.35671	2.13685	8.93795e-11	2.40358e-09
Cs2g12520	-1.45874	4.26137	9.0275e-11	2.42443e-09
Cs4g17040	1.03942	7.39033	9.11895e-11	2.44572e-09
Cs3g23500	1.02295	7.69371	9.26293e-11	2.47774e-09
Cs4g01460	1.1444	7.02876	9.66377e-11	2.58153e-09
orange1.1t01283	-1.33853	5.37994	9.68085e-11	2.58267e-09
Cs2g12590	1.21967	6.27868	9.73094e-11	2.5926e-09
Cs5g27140	-1.91069	3.75441	9.82609e-11	2.61449e-09
Cs4g17340	-1.4885	4.40992	1.00319e-10	2.66572e-09
Cs7g19320	1.34357	9.052	1.00516e-10	2.66745e-09
Cs3g02740	-1.35221	4.27666	1.01662e-10	2.69432e-09
Cs1g17310	1.24542	5.08595	1.02686e-10	2.71786e-09
Cs2g22900	-1.23924	5.02097	1.03891e-10	2.74617e-09
Cs6g21200	1.25954	6.32436	1.04554e-10	2.76007e-09
Cs4g05190	3.48014	6.46154	1.07522e-10	2.83469e-09
Cs2g17230	1.03997	8.23939	1.09271e-10	2.87704e-09
Cs9g03190	-2.01522	3.05719	1.16877e-10	3.07329e-09
orange1.1t02747	1.27542	5.71919	1.20067e-10	3.15306e-09
Cs7g13310	-1.44138	7.91769	1.21211e-10	3.17894e-09
Cs7g29840	1.06731	5.94133	1.24797e-10	3.2645e-09
Cs1g16440	-1.32021	5.25005	1.28557e-10	3.35848e-09
Cs9g01590	1.00132	6.63938	1.30745e-10	3.41123e-09
Cs8g04610	2.57653	5.06662	1.31698e-10	3.43165e-09
orange1.1t00743	-1.23596	6.49905	1.33646e-10	3.47789e-09
orange1.1t03572	1.06645	8.90355	1.39131e-10	3.61132e-09
Cs3g14120	-1.08399	5.69332	1.39841e-10	3.62471e-09
orange1.1t01791	1.11661	5.33843	1.40007e-10	3.62471e-09
Cs4g14090	1.32688	7.49653	1.40332e-10	3.62845e-09
orange1.1t01469	-7.4463	-0.10397	1.42602e-10	3.68242e-09
orange1.1t00392	1.23325	5.72443	1.442e-10	3.71892e-09
Cs9g17460	3.13599	3.34017	1.45879e-10	3.75741e-09
Cs3g03420	1.07287	5.87804	1.46468e-10	3.76776e-09
Cs3g26850	-1.72614	8.55968	1.46721e-10	3.76945e-09
Cs2g04980	4.48608	2.69324	1.47014e-10	3.77218e-09
Cs8g18970	-1.28093	4.50167	1.50568e-10	3.85844e-09
Cs9g05010	1.61642	4.6792	1.5325e-10	3.92219e-09
Cs2g09880	1.06797	5.70441	1.55608e-10	3.97749e-09
Cs4g15890	1.03071	8.95474	1.61167e-10	4.10926e-09
Cs1g25480	-2.10354	3.00578	1.61171e-10	4.10926e-09
Cs2g14860	1.1808	5.72479	1.65101e-10	4.20413e-09
Cs9g01660	1.13512	5.13813	1.65848e-10	4.21782e-09
Cs1g20370	-1.47164	4.37594	1.70629e-10	4.33168e-09
Cs4g08690	1.67012	4.06048	1.70755e-10	4.33168e-09
Cs2g02980	1.71667	8.66	1.71424e-10	4.34318e-09
Cs1g17780	-1.1651	5.32446	1.89646e-10	4.79882e-09
orange1.1t03299	-1.32666	4.83108	1.89961e-10	4.80075e-09
orange1.1t01779	-1.03384	6.43257	1.92964e-10	4.87054e-09
orange1.1t00459	-1.25547	4.79165	1.94844e-10	4.91183e-09
Cs4g10950	1.01514	5.60807	1.96467e-10	4.94656e-09
Cs6g09120	-1.11499	6.04981	1.97468e-10	4.96555e-09
Cs1g23430	1.71902	4.24666	2.02319e-10	5.08118e-09
Cs9g18610	1.23929	5.01593	2.06839e-10	5.18343e-09
orange1.1t04714	1.15488	5.22161	2.06905e-10	5.18343e-09
Cs1g04570	1.49307	7.34158	2.07404e-10	5.18948e-09
Cs9g01710	-6.21681	0.473812	2.13299e-10	5.33036e-09
Cs8g02290	-1.42588	4.1852	2.14811e-10	5.3615e-09
Cs5g29050	1.05068	5.91419	2.19442e-10	5.4703e-09
Cs6g03010	-1.37075	4.11705	2.21411e-10	5.51257e-09
Cs8g04700	3.34722	3.87024	2.27386e-10	5.65432e-09
Cs1g13070	1.69706	4.02257	2.35296e-10	5.82984e-09
orange1.1t00430	1.13099	5.12136	2.35312e-10	5.82984e-09
Cs6g10560	1.03747	7.84699	2.4104e-10	5.96441e-09
Cs7g30680	-2.95632	1.6009	2.42248e-10	5.98693e-09
orange1.1t00546	-1.85426	3.24337	2.43757e-10	6.01685e-09
orange1.1t01665	1.07035	5.72411	2.45685e-10	6.05703e-09
Cs7g30330	-1.4398	4.50008	2.56578e-10	6.31014e-09
Cs1g05780	-1.18267	5.48648	2.57552e-10	6.32636e-09
Cs5g24300	1.14758	5.81048	2.58716e-10	6.34721e-09
Cs1g12420	-1.16692	5.11511	2.64612e-10	6.47608e-09
Cs5g10220	1.20229	5.90957	2.65281e-10	6.47737e-09
Cs7g32390	-1.53104	4.033	2.65308e-10	6.47737e-09
Cs6g07360	1.12243	7.82122	2.66795e-10	6.5058e-09
Cs7g15050	2.99512	1.99088	2.80055e-10	6.82089e-09
Cs4g03660	-1.29443	4.73567	2.86023e-10	6.95782e-09
Cs6g03640	1.11315	5.93578	2.88931e-10	7.02007e-09
Cs3g24430	-1.49829	4.72502	2.90452e-10	7.04854e-09
Cs3g05760	2.32716	2.98853	2.92835e-10	7.09782e-09
orange1.1t02196	1.01079	6.62641	2.9353e-10	7.1061e-09
Cs5g09300	-1.10633	7.504	2.98424e-10	7.21591e-09
orange1.1t02044	-1.3672	5.1046	3.04908e-10	7.36385e-09
Cs3g25140	3.0694	2.5202	3.0597e-10	7.38067e-09
Cs8g19650	1.43596	4.808	3.10286e-10	7.46715e-09
Cs8g17030	2.63107	2.20273	3.10297e-10	7.46715e-09
Cs7g02730	1.02238	6.23116	3.15217e-10	7.57648e-09
Cs2g17480	-1.19759	5.66498	3.25094e-10	7.7953e-09
orange1.1t02586	-2.31729	2.76851	3.25565e-10	7.7973e-09
orange1.1t00498	-1.83989	3.07998	3.30095e-10	7.89055e-09
Cs4g19400	-1.18976	7.61317	3.30242e-10	7.89055e-09
Cs2g13920	2.9034	3.69951	3.31381e-10	7.90839e-09
Cs2g16980	1.02827	7.45863	3.35556e-10	7.99854e-09
Cs7g19830	2.62909	5.48875	3.38735e-10	8.05847e-09
Cs2g16260	2.92883	8.31971	3.3887e-10	8.05847e-09
Cs4g03200	2.08595	4.56967	3.46665e-10	8.23412e-09
orange1.1t01647	-1.01638	5.71176	3.53914e-10	8.3964e-09
Cs8g12070	1.37146	4.71212	3.60203e-10	8.53555e-09
Cs4g02250	-1.28997	4.39257	3.61652e-10	8.55981e-09
Cs1g09130	1.93677	4.91243	3.62956e-10	8.58059e-09
Cs1g11390	-1.31472	4.64229	3.65524e-10	8.63117e-09
Cs2g01510	-1.88416	3.00624	3.79918e-10	8.96054e-09
orange1.1t00566	1.02295	10.3723	3.81617e-10	8.9901e-09
Cs8g12840	-1.13383	5.46285	3.96259e-10	9.32413e-09
Cs1g13250	1.50391	3.73997	4.02887e-10	9.46903e-09
Cs3g06580	1.26701	4.69837	4.04147e-10	9.48757e-09
Cs3g21140	1.00626	6.21705	4.11216e-10	9.64227e-09
Cs3g25990	-1.37968	4.43029	4.29278e-10	1.00342e-08
Cs7g09330	-1.07169	5.5636	4.29824e-10	1.00342e-08
Cs9g09750	-1.58821	4.80423	4.29922e-10	1.00342e-08
Cs4g15710	-1.55352	6.08037	4.35592e-10	1.01547e-08
orange1.1t00634	1.53831	6.28137	4.3678e-10	1.01618e-08
Cs7g08550	-1.38561	4.1704	4.36904e-10	1.01618e-08
Cs3g08570	-4.20832	0.487002	4.53724e-10	1.05312e-08
Cs8g20170	1.64354	3.90311	4.53834e-10	1.05312e-08
Cs7g12540	1.24063	7.08574	4.57546e-10	1.06052e-08
Cs4g16200	-1.68641	3.38538	4.6785e-10	1.08315e-08
Cs7g31930	1.27876	6.27316	4.77238e-10	1.10362e-08
Cs6g13110	-2.68125	1.87258	4.98508e-10	1.15149e-08
Cs6g05440	4.3201	1.59496	5.02873e-10	1.16024e-08
Cs9g07790	2.86136	2.22122	5.12363e-10	1.18078e-08
Cs2g20590	1.95272	9.08533	5.16762e-10	1.18956e-08
Cs9g19220	-1.45199	4.84872	5.24885e-10	1.20688e-08
Cs4g04530	5.07492	3.31472	5.37196e-10	1.23378e-08
orange1.1t04964	-1.24323	4.58932	5.46333e-10	1.25333e-08
Cs8g17810	3.00505	3.38174	5.48628e-10	1.25716e-08
Cs1g05480	-1.30777	5.23003	5.55776e-10	1.2721e-08
Cs5g28410	1.66232	4.20012	5.66646e-10	1.2955e-08
Cs3g07530	1.04847	5.51192	5.83429e-10	1.33236e-08
Cs2g05510	-2.52801	5.55627	5.85606e-10	1.33582e-08
Cs5g32310	1.33365	4.48542	5.92588e-10	1.35022e-08
Cs5g08950	1.38395	4.51553	6.03497e-10	1.37197e-08
Cs5g01110	-1.1259	5.56565	6.05321e-10	1.37456e-08
Cs9g05650	-1.19961	4.74823	6.18044e-10	1.40187e-08
Cs1g12410	1.18686	7.03156	6.45564e-10	1.45937e-08
orange1.1t01787	-1.68624	3.32801	6.61521e-10	1.49376e-08
Cs6g16730	-1.04287	6.08476	6.68181e-10	1.50711e-08
Cs6g02180	-2.16349	4.50341	6.91086e-10	1.55703e-08
orange1.1t00448	1.06675	6.68479	6.93109e-10	1.55984e-08
Cs7g18460	-1.40354	4.8361	7.02306e-10	1.57878e-08
Cs4g06330	-1.02302	5.53768	7.37039e-10	1.65501e-08
Cs3g07770	2.15599	5.36151	7.40298e-10	1.66048e-08
Cs2g08600	1.0044	5.62449	7.46599e-10	1.67275e-08
Cs2g28060	-1.5407	5.52422	7.48071e-10	1.67418e-08
Cs7g26820	-1.00284	5.73472	7.61881e-10	1.7032e-08
orange1.1t02261	-1.01419	6.26983	7.77299e-10	1.73574e-08
Cs8g19800	-1.10294	7.2299	7.96639e-10	1.77696e-08
Cs7g29420	-2.77954	2.5545	8.13133e-10	1.81174e-08
Cs7g14550	-1.43154	4.38739	8.15099e-10	1.81411e-08
orange1.1t00727	-1.74419	3.65009	8.44657e-10	1.87469e-08
Cs1g17360	-3.92789	0.82938	8.45109e-10	1.87469e-08
Cs2g01740	-1.70921	5.46765	8.4863e-10	1.88043e-08
Cs8g20900	2.33868	2.97277	8.51888e-10	1.88557e-08
Cs3g20290	1.68008	3.50242	8.99811e-10	1.98617e-08
Cs2g03220	1.15092	4.86845	9.00295e-10	1.98617e-08
Cs5g08850	2.15253	3.6108	9.34055e-10	2.05839e-08
Cs6g09780	1.45925	5.06194	9.49122e-10	2.08931e-08
Cs5g09080	-5.23571	0.316204	9.64028e-10	2.11792e-08
Cs3g18050	3.84232	2.10105	9.64221e-10	2.11792e-08
orange1.1t03197	-1.42834	4.00269	9.66644e-10	2.12093e-08
orange1.1t03073	1.2779	4.18556	9.82001e-10	2.14994e-08
Cs5g34820	-1.16225	4.97129	9.84029e-10	2.15204e-08
Cs5g33410	5.51305	0.5601	1.00542e-09	2.19643e-08
Cs8g16640	-1.1287	6.97177	1.03016e-09	2.24804e-08
Cs3g27170	1.54883	4.37387	1.03244e-09	2.2506e-08
Cs5g30570	1.42053	5.37872	1.05806e-09	2.30393e-08
Cs4g10710	1.40503	5.06414	1.05985e-09	2.30534e-08
Cs4g07440	-1.65743	3.74506	1.10777e-09	2.40697e-08
Cs3g20570	1.51958	5.01263	1.11705e-09	2.42452e-08
Cs2g06920	1.25452	5.88032	1.13891e-09	2.46932e-08
Cs2g14240	1.82879	5.00359	1.14599e-09	2.482e-08
Cs3g25800	-1.19665	4.79889	1.14836e-09	2.48445e-08
orange1.1t01990	-1.08479	5.206	1.16133e-09	2.50983e-08
Cs4g07550	1.00796	6.32284	1.16674e-09	2.5188e-08
Cs5g07250	-1.31391	4.46574	1.19817e-09	2.58389e-08
Cs7g13320	1.86066	3.79976	1.21518e-09	2.61778e-08
Cs2g04370	-1.86109	5.61704	1.21844e-09	2.622e-08
Cs8g19530	-1.19373	5.66495	1.23213e-09	2.64863e-08
orange1.1t01401	-2.13973	2.77063	1.25023e-09	2.68467e-08
Cs3g17220	2.84832	1.55956	1.26522e-09	2.71395e-08
Cs7g03800	1.44991	4.20002	1.2726e-09	2.72689e-08
Cs6g19205	1.09011	6.26797	1.28945e-09	2.7542e-08
Cs3g16510	2.87472	2.35319	1.31375e-09	2.80312e-08
Cs4g12600	1.04577	5.83731	1.33181e-09	2.83566e-08
Cs8g19150	-1.60384	3.38584	1.35828e-09	2.88896e-08
orange1.1t03683	1.02399	7.73703	1.40082e-09	2.9763e-08
Cs8g11000	1.01564	6.85154	1.42615e-09	3.02692e-08
Cs2g23870	1.22429	4.68439	1.47846e-09	3.13464e-08
Cs8g08820	-3.14351	4.01077	1.52602e-09	3.23207e-08
Cs7g21340	2.81561	2.78378	1.54207e-09	3.25922e-08
Cs7g15750	-2.66905	2.06	1.56374e-09	3.30155e-08
Cs9g14150	1.62541	7.2754	1.62943e-09	3.43305e-08
Cs1g19290	1.52333	6.40705	1.63705e-09	3.44192e-08
Cs6g01180	-1.2259	4.62735	1.64101e-09	3.44664e-08
Cs7g10810	-1.96449	2.64594	1.67467e-09	3.51367e-08
Cs8g20990	1.08778	5.20556	1.71642e-09	3.59005e-08
Cs3g21490	-1.94116	2.90047	1.80507e-09	3.76373e-08
orange1.1t00650	-1.64473	3.28187	1.81097e-09	3.77214e-08
Cs2g11370	1.00338	7.90795	1.82285e-09	3.79297e-08
Cs2g11380	1.65706	3.49755	1.87513e-09	3.89771e-08
Cs9g03660	1.08021	5.24212	1.90302e-09	3.94816e-08
Cs1g25530	2.32156	4.65753	1.92682e-09	3.9928e-08
Cs3g11285	1.21406	5.05363	1.94671e-09	4.02574e-08
Cs2g06970	1.03472	6.10067	1.95698e-09	4.04281e-08
Cs5g10170	-3.3093	1.11319	1.97408e-09	4.07397e-08
Cs7g01870	-3.79678	0.716537	2.02504e-09	4.17485e-08
Cs7g30900	1.66714	4.31765	2.03494e-09	4.19099e-08
Cs2g06050	-1.03409	5.38515	2.21716e-09	4.5511e-08
Cs2g03990	-1.70395	3.2889	2.21884e-09	4.5511e-08
orange1.1t00296	-1.73763	3.21244	2.25353e-09	4.61755e-08
Cs8g06810	1.28984	8.11857	2.25749e-09	4.62098e-08
Cs3g15040	-1.18226	7.66325	2.28533e-09	4.67321e-08
Cs4g15290	-1.49671	3.5192	2.30871e-09	4.71146e-08
Cs4g15510	1.83348	6.71018	2.41792e-09	4.91937e-08
Cs7g08110	3.32865	0.941963	2.49466e-09	5.07038e-08
Cs1g19280	1.38738	8.12893	2.5261e-09	5.12911e-08
Cs5g01510	1.30629	8.96646	2.54717e-09	5.16147e-08
Cs8g01970	2.04248	2.22518	2.6442e-09	5.35271e-08
Cs1g21000	1.1717	5.82522	2.70815e-09	5.47116e-08
Cs7g16280	1.5574	4.37143	2.85285e-09	5.74622e-08
Cs4g06520	1.01142	8.25582	2.85633e-09	5.74747e-08
Cs2g18270	2.13309	3.23243	2.89032e-09	5.80953e-08
Cs9g06420	-1.32103	4.30154	2.89294e-09	5.80953e-08
Cs8g05280	-1.01813	6.0964	2.98297e-09	5.9784e-08
Cs5g04620	-1.71719	3.11307	3.01602e-09	6.03864e-08
Cs2g08760	-1.76484	2.96484	3.08935e-09	6.17318e-08
Cs7g15990	-1.71482	3.1027	3.11007e-09	6.20843e-08
Cs7g07140	1.42007	7.94638	3.23032e-09	6.43571e-08
orange1.1t02100	-2.43772	1.83872	3.24076e-09	6.45013e-08
orange1.1t00571	1.31299	5.11037	3.26332e-09	6.48862e-08
Cs2g03110	-1.85862	7.68127	3.35298e-09	6.66033e-08
orange1.1t00246	3.21669	0.84817	3.44138e-09	6.82783e-08
Cs5g20610	-11.8091	4.03536	3.513e-09	6.94395e-08
Cs5g32100	1.23188	4.67331	3.53065e-09	6.97199e-08
Cs8g16300	1.12457	5.88674	3.61089e-09	7.12346e-08
Cs4g17620	1.1452	4.67207	3.70031e-09	7.27139e-08
Cs5g30500	-1.46787	4.51168	3.73447e-09	7.33135e-08
orange1.1t03764	1.02092	6.21121	3.75574e-09	7.36594e-08
orange1.1t03382	1.09804	5.47412	3.77774e-09	7.39468e-08
Cs7g20870	1.03196	6.75013	3.87803e-09	7.57626e-08
Cs3g22030	1.1065	4.7576	3.92767e-09	7.66451e-08
Cs9g03020	1.00905	5.58892	3.93306e-09	7.66451e-08
Cs9g12570	2.09585	2.16832	3.93462e-09	7.66451e-08
Cs2g09020	1.05997	7.51132	3.95147e-09	7.6879e-08
Cs3g25420	1.11655	10.5606	3.95807e-09	7.6879e-08
Cs3g09020	-2.14928	2.01281	4.07853e-09	7.90662e-08
Cs4g18560	-1.51058	3.58634	4.25996e-09	8.2504e-08
Cs1g04350	1.18572	4.45404	4.2737e-09	8.26906e-08
Cs9g04690	1.7103	3.24006	4.48717e-09	8.66545e-08
Cs8g15610	2.81834	2.18731	4.52289e-09	8.72064e-08
Cs3g16420	-1.81295	2.96186	4.52441e-09	8.72064e-08
Cs3g06120	-1.33611	4.0957	4.53294e-09	8.72873e-08
Cs5g01970	1.2202	7.72804	4.5931e-09	8.8277e-08
Cs1g17920	1.3522	5.53659	4.59965e-09	8.83186e-08
orange1.1t03043	1.00281	5.39703	4.73799e-09	9.08017e-08
Cs2g01770	1.48889	4.70364	4.94621e-09	9.4612e-08
Cs9g10300	1.05628	8.13254	5.16649e-09	9.8732e-08
Cs7g32200	-3.9348	0.986075	5.18268e-09	9.89473e-08
Cs6g05980	-2.34791	1.94205	5.68032e-09	1.08243e-07
Cs6g18510	-1.79444	3.13694	5.94589e-09	1.13197e-07
Cs8g20560	-1.17646	4.95936	5.98289e-09	1.13794e-07
Cs1g17210	2.35616	7.09908	6.09667e-09	1.15739e-07
Cs3g18340	2.33441	2.55078	6.12825e-09	1.16229e-07
Cs3g07240	-2.72206	1.30146	6.1482e-09	1.16498e-07
Cs5g01210	-1.28529	4.0814	6.30035e-09	1.19269e-07
Cs7g12860	-1.70276	3.67277	6.43421e-09	1.21581e-07
Cs2g14760	1.19093	6.59835	6.43456e-09	1.21581e-07
Cs9g11610	-1.20012	4.35804	6.46965e-09	1.22129e-07
Cs2g30930	1.18206	5.44602	6.49284e-09	1.22337e-07
Cs2g28370	-1.42398	7.44564	6.59531e-09	1.24152e-07
Cs3g26870	-1.47781	3.70559	6.60909e-09	1.24295e-07
Cs1g19700	-1.27335	4.58812	6.69788e-09	1.25848e-07
Cs4g06720	2.14616	2.32583	6.85023e-09	1.28471e-07
Cs1g05970	1.8966	4.25484	6.93174e-09	1.29878e-07
Cs3g09670	-1.23772	4.35896	7.12656e-09	1.33404e-07
Cs3g18700	-1.528	3.53642	7.16925e-09	1.34079e-07
Cs4g01630	1.51146	7.157	7.1848e-09	1.34245e-07
Cs7g07120	-1.60273	4.85953	7.3005e-09	1.36117e-07
Cs2g09460	1.35843	5.43626	7.30524e-09	1.36117e-07
Cs5g22920	1.09597	5.71432	7.37584e-09	1.37305e-07
Cs7g25930	1.14562	4.73699	7.40318e-09	1.37687e-07
Cs6g11690	-2.2854	4.25168	7.49241e-09	1.39099e-07
Cs2g05350	1.14023	8.30336	7.498e-09	1.39099e-07
Cs1g09550	-1.21361	5.09221	7.49981e-09	1.39099e-07
orange1.1t03024	1.86551	7.31155	7.56274e-09	1.40137e-07
Cs6g19380	2.02576	6.54704	7.58581e-09	1.40435e-07
Cs3g17120	-1.07124	4.85983	7.79709e-09	1.43818e-07
Cs5g28500	1.09931	4.82196	8.21297e-09	1.51074e-07
Cs7g27910	1.35152	4.08506	8.29109e-09	1.52233e-07
Cs5g06590	1.98759	4.47164	8.43253e-09	1.54689e-07
Cs2g07110	1.02345	5.66694	8.61709e-09	1.57643e-07
Cs8g12000	1.24723	5.47437	8.68235e-09	1.58693e-07
Cs2g27230	1.15696	5.50707	8.81352e-09	1.60945e-07
Cs7g32280	-1.35901	4.243	9.57823e-09	1.74277e-07
Cs4g17900	-2.18474	2.39368	9.74931e-09	1.77205e-07
Cs4g20030	-1.27388	6.39496	9.89161e-09	1.79493e-07
Cs2g18260	2.58015	1.95548	1.00393e-08	1.82009e-07
Cs4g10240	1.80057	6.51523	1.01742e-08	1.84123e-07
Cs6g13740	1.71541	2.93728	1.03551e-08	1.87228e-07
Cs6g15610	-1.52709	4.28391	1.04973e-08	1.8963e-07
Cs5g27890	-1.19509	4.69751	1.05588e-08	1.90569e-07
orange1.1t02606	-1.77722	4.55721	1.06486e-08	1.92018e-07
Cs8g01150	-1.62992	3.50242	1.10718e-08	1.99471e-07
Cs2g09620	-1.44962	4.13024	1.13226e-08	2.03625e-07
Cs6g14570	2.7058	3.44562	1.13507e-08	2.03948e-07
Cs5g29870	-2.85988	1.7939	1.16283e-08	2.08749e-07
Cs7g16260	1.25312	4.33449	1.17153e-08	2.10124e-07
orange1.1t04715	1.0404	5.18085	1.21673e-08	2.18037e-07
Cs4g03640	-1.7527	3.00417	1.22242e-08	2.18862e-07
Cs6g02780	1.20646	4.41762	1.23259e-08	2.20487e-07
Cs7g06120	1.936	5.28916	1.23477e-08	2.20681e-07
Cs1g23030	-1.73728	3.11052	1.26034e-08	2.25037e-07
orange1.1t01402	-1.16411	4.54393	1.26138e-08	2.25037e-07
Cs5g08980	-1.19052	4.49802	1.31515e-08	2.34268e-07
Cs7g29490	1.01619	5.32994	1.31545e-08	2.34268e-07
Cs5g04300	5.38296	-0.241782	1.31818e-08	2.34548e-07
orange1.1t00200	-2.02587	2.37422	1.34041e-08	2.38293e-07
Cs6g20990	1.28101	4.41203	1.34982e-08	2.39755e-07
Cs7g15950	1.48912	5.12199	1.36076e-08	2.41271e-07
orange1.1t04139	1.67375	9.26787	1.36321e-08	2.41493e-07
Cs6g05880	1.19103	5.17539	1.38916e-08	2.45657e-07
Cs7g11120	1.13868	5.05744	1.39818e-08	2.4682e-07
Cs1g01190	-1.71798	4.72978	1.41798e-08	2.50096e-07
Cs1g06860	-1.22953	5.02346	1.41984e-08	2.50205e-07
Cs1g20260	1.28341	4.44132	1.42653e-08	2.51163e-07
Cs8g01960	3.45507	5.96744	1.4458e-08	2.53989e-07
Cs5g18230	1.22773	6.63553	1.44612e-08	2.53989e-07
Cs8g16140	1.48941	4.23827	1.45827e-08	2.55858e-07
Cs2g13250	-1.10238	5.34645	1.49369e-08	2.61389e-07
Cs6g22020	-1.09477	5.80359	1.4979e-08	2.61898e-07
Cs7g24730	1.3986	4.55427	1.50862e-08	2.63544e-07
Cs2g18290	2.29419	2.51794	1.5164e-08	2.64673e-07
Cs8g20240	1.61476	3.9476	1.5412e-08	2.6877e-07
Cs6g02540	-1.7572	2.91944	1.54806e-08	2.69498e-07
Cs7g03750	1.27598	5.75815	1.59745e-08	2.77857e-07
orange1.1t01745	1.21367	7.37947	1.62872e-08	2.83052e-07
orange1.1t01790	-1.16	5.58296	1.63451e-08	2.83812e-07
Cs5g02440	1.91165	6.51616	1.69396e-08	2.93882e-07
Cs7g17520	-1.49076	3.66939	1.72927e-08	2.99492e-07
Cs8g16930	-1.70686	3.22949	1.76206e-08	3.04909e-07
Cs1g07030	-2.13749	3.15485	1.76847e-08	3.05493e-07
Cs7g28155	-1.25384	4.32089	1.78367e-08	3.07855e-07
Cs6g15140	1.49457	3.52968	1.79885e-08	3.10209e-07
Cs6g13990	1.13356	4.43887	1.80485e-08	3.10978e-07
Cs3g19890	1.12653	8.60003	1.86196e-08	3.2027e-07
Cs4g09330	1.26288	4.9058	1.8913e-08	3.25039e-07
Cs2g21170	1.2264	5.68899	1.91239e-08	3.28103e-07
Cs7g29980	2.16427	2.44891	1.92547e-08	3.30067e-07
Cs8g20580	1.24169	4.18261	1.92782e-08	3.30189e-07
Cs3g22210	1.24027	4.10581	2.01978e-08	3.45352e-07
Cs4g10040	4.96038	1.75894	2.02546e-08	3.4603e-07
Cs1g05460	3.44017	1.46859	2.04695e-08	3.49404e-07
Cs1g20460	-3.07208	1.59533	2.10023e-08	3.57892e-07
Cs2g14990	1.76073	4.0305	2.10752e-08	3.58528e-07
Cs5g07880	-1.01624	5.12269	2.17503e-08	3.68767e-07
Cs4g10140	1.4615	4.27399	2.17733e-08	3.68847e-07
Cs2g30150	-2.83634	2.00383	2.18433e-08	3.69721e-07
Cs6g07600	-1.23696	4.32094	2.20457e-08	3.72521e-07
Cs4g17100	-1.4266	4.61908	2.21858e-08	3.73947e-07
Cs7g26870	4.98402	0.896268	2.24956e-08	3.78535e-07
Cs5g26900	1.14583	4.28999	2.28947e-08	3.84929e-07
Cs2g23850	-1.52698	3.61512	2.33989e-08	3.93079e-07
Cs7g06580	2.29309	1.75321	2.38366e-08	4.00097e-07
Cs7g06720	-3.14342	2.5868	2.39894e-08	4.02327e-07
Cs1g08110	-2.26588	3.61374	2.4208e-08	4.05655e-07
Cs9g07630	-1.13172	4.56943	2.42345e-08	4.05761e-07
Cs2g26630	-1.0116	6.31359	2.45228e-08	4.10248e-07
Cs3g24200	-2.43059	2.99375	2.49058e-08	4.15964e-07
Cs3g20220	1.00383	4.9699	2.5484e-08	4.25268e-07
Cs5g24440	-1.11155	4.38977	2.55484e-08	4.2599e-07
Cs8g02010	1.05477	7.63692	2.63262e-08	4.37871e-07
Cs2g21235	1.87178	4.37256	2.6474e-08	4.39966e-07
orange1.1t02094	-1.06894	4.67809	2.71055e-08	4.49865e-07
Cs7g20440	-1.03559	4.96909	2.71143e-08	4.49865e-07
Cs3g23070	1.61724	7.72322	2.714e-08	4.49921e-07
Cs6g11130	-2.74855	1.15227	2.74092e-08	4.54011e-07
Cs8g17200	1.94128	3.41871	2.7596e-08	4.56729e-07
Cs3g20340	-1.67656	3.03864	2.76218e-08	4.5678e-07
Cs5g08500	1.03984	6.98342	2.80364e-08	4.62497e-07
Cs7g27640	1.56526	4.41914	2.81745e-08	4.64395e-07
orange1.1t04729	-1.06167	5.67323	2.8879e-08	4.75229e-07
Cs5g04750	-1.31959	3.90893	2.89253e-08	4.75603e-07
orange1.1t00537	1.06426	7.40902	2.91026e-08	4.78127e-07
orange1.1t02418	1.34302	4.09373	2.91647e-08	4.78757e-07
orange1.1t03275	-5.10399	4.41129	2.92477e-08	4.79729e-07
Cs9g06130	3.92057	0.243652	2.93874e-08	4.81628e-07
orange1.1t00937	-1.07918	5.2602	2.9794e-08	4.87894e-07
Cs2g23970	-5.30525	-0.304934	3.09178e-08	5.04657e-07
orange1.1t01713	1.55217	5.58327	3.12028e-08	5.08896e-07
Cs3g26750	-1.51379	3.62194	3.22671e-08	5.24978e-07
Cs6g07280	1.14898	7.05816	3.38337e-08	5.50023e-07
Cs3g23940	-1.58334	3.33628	3.39581e-08	5.516e-07
Cs8g10820	-1.03054	5.91858	3.44596e-08	5.58844e-07
Cs4g16650	1.02667	6.57951	3.51837e-08	5.6967e-07
Cs1g22750	-2.28367	1.86285	3.53916e-08	5.72117e-07
Cs6g11510	-1.17201	5.52311	3.61961e-08	5.84652e-07
Cs9g19280	-1.25174	4.41611	3.64754e-08	5.88692e-07
Cs1g01800	2.59579	4.58517	3.71019e-08	5.98325e-07
Cs3g03970	2.44198	5.5043	3.7543e-08	6.04953e-07
Cs9g09800	-1.95956	2.4679	3.80779e-08	6.13081e-07
Cs8g02780	-1.28633	6.58236	3.81564e-08	6.13854e-07
Cs5g28250	-1.46581	7.29478	3.85834e-08	6.19734e-07
Cs2g13860	1.54479	3.45885	3.92528e-08	6.29983e-07
Cs9g16680	-1.18805	4.90226	3.93285e-08	6.30697e-07
Cs5g09930	-2.47465	2.51484	3.98086e-08	6.36875e-07
Cs6g15450	2.38661	4.06286	3.99134e-08	6.38045e-07
Cs7g04580	1.03896	7.72048	3.9968e-08	6.38411e-07
Cs5g31270	-1.08471	4.56997	4.11414e-08	6.56112e-07
Cs5g31040	1.09784	4.73576	4.13702e-08	6.5777e-07
Cs2g05660	-1.28393	4.36551	4.1376e-08	6.5777e-07
Cs7g15610	1.42754	5.18161	4.14566e-08	6.58532e-07
Cs9g02540	-4.06809	0.104727	4.36167e-08	6.9121e-07
Cs7g04700	1.67293	3.97756	4.38713e-08	6.94152e-07
Cs9g06490	-1.16108	5.81094	4.55296e-08	7.19261e-07
orange1.1t03466	2.15409	2.01723	4.63357e-08	7.30276e-07
orange1.1t01405	-1.27012	3.76872	4.66221e-08	7.34216e-07
Cs6g18400	4.55083	1.01263	4.68808e-08	7.37713e-07
Cs1g14030	1.14413	4.61246	4.73697e-08	7.44824e-07
Cs3g05280	-1.10451	4.46419	4.75519e-08	7.46523e-07
Cs5g16310	-2.11288	3.09173	4.77397e-08	7.47951e-07
Cs5g31400	2.61319	1.26564	4.95188e-08	7.73783e-07
Cs5g27530	1.23253	5.06054	4.97204e-08	7.75678e-07
Cs9g07970	-2.01344	4.50784	4.97498e-08	7.75678e-07
Cs3g03045	-3.92651	0.978766	4.97556e-08	7.75678e-07
Cs2g27460	3.16952	1.97358	4.99381e-08	7.77923e-07
Cs1g25540	-2.87834	3.40234	5.12494e-08	7.97116e-07
Cs6g07920	-1.08343	8.55134	5.15929e-08	8.01839e-07
Cs4g06650	-1.07865	6.6992	5.22035e-08	8.10079e-07
Cs3g14680	-1.14707	8.15376	5.29859e-08	8.20325e-07
Cs2g14290	1.06413	4.89922	5.36729e-08	8.30322e-07
orange1.1t05301	-2.26783	2.08377	5.45678e-08	8.43519e-07
Cs5g13070	1.32923	4.0626	5.49382e-08	8.48593e-07
orange1.1t00394	-1.13981	5.10113	5.55189e-08	8.56905e-07
Cs2g22030	-1.41857	3.6979	5.65863e-08	8.72044e-07
Cs3g12850	1.05196	4.7571	5.85074e-08	8.98898e-07
orange1.1t02784	-1.14016	6.53174	5.93453e-08	9.10056e-07
Cs4g05430	1.04003	7.16768	5.93692e-08	9.10056e-07
Cs7g09780	-1.22	4.48016	5.98499e-08	9.16728e-07
Cs6g13360	1.61592	3.08009	6.10068e-08	9.33029e-07
Cs2g21560	-1.0145	5.39477	6.16085e-08	9.41517e-07
Cs3g13710	1.17676	4.88946	6.42185e-08	9.79174e-07
Cs5g08000	1.46791	3.57742	6.49147e-08	9.88293e-07
orange1.1t04049	-1.14652	4.52982	6.55175e-08	9.96717e-07
Cs4g19950	-1.12394	4.33371	6.68738e-08	1.01658e-06
Cs1g13880	1.73471	4.78602	6.75158e-08	1.02557e-06
Cs8g01880	2.62549	5.66372	6.83867e-08	1.03801e-06
Cs5g29130	-1.08869	4.67646	6.88512e-08	1.04428e-06
Cs3g09280	2.33614	4.76808	6.89387e-08	1.04482e-06
Cs8g18380	-2.90625	1.83348	7.02925e-08	1.06453e-06
Cs1g21680	1.48181	4.10111	7.2965e-08	1.10335e-06
Cs2g24680	1.21771	4.61004	7.36155e-08	1.11068e-06
Cs1g22670	-1.13842	4.28161	7.42998e-08	1.12017e-06
Cs5g29510	1.1899	5.01598	7.6129e-08	1.14689e-06
Cs3g24260	1.63412	6.59919	7.64715e-08	1.15033e-06
Cs1g10560	-1.08468	4.34498	8.23452e-08	1.23486e-06
Cs2g29360	1.21957	4.81953	8.23883e-08	1.23486e-06
Cs3g05470	-1.72622	3.19509	8.24587e-08	1.23486e-06
Cs7g25700	-1.10577	5.37815	8.35121e-08	1.24878e-06
Cs2g21640	1.07016	4.93912	8.39776e-08	1.2548e-06
Cs4g12310	-1.93458	2.52413	8.72877e-08	1.30233e-06
Cs3g27610	-1.01869	6.92318	9.05172e-08	1.34852e-06
Cs7g02940	1.02443	7.91561	9.09822e-08	1.35444e-06
Cs6g02030	-1.59654	3.83372	9.24178e-08	1.3748e-06
Cs3g02030	-1.44202	3.71511	9.32513e-08	1.38618e-06
Cs5g06800	3.02462	1.03804	9.44543e-08	1.40302e-06
Cs9g07070	-1.09323	4.85014	9.62761e-08	1.42798e-06
Cs2g09500	3.38075	0.986742	9.80097e-08	1.45262e-06
Cs2g09600	1.87736	3.74132	9.91812e-08	1.4689e-06
Cs7g10770	1.13206	4.83677	1.02115e-07	1.51124e-06
Cs3g23980	1.11037	4.19211	1.04069e-07	1.53677e-06
Cs6g04260	-1.17625	4.57447	1.05534e-07	1.55613e-06
Cs8g17890	1.89918	2.49648	1.07846e-07	1.58905e-06
Cs9g18700	1.20101	6.84542	1.10166e-07	1.62086e-06
Cs3g16590	-1.26405	3.82848	1.13978e-07	1.67451e-06
Cs5g24610	3.47676	2.10377	1.16815e-07	1.71243e-06
orange1.1t01772	-1.30474	4.58339	1.20152e-07	1.75879e-06
Cs3g03170	-1.04297	4.82752	1.22383e-07	1.78885e-06
Cs5g28770	-1.59537	2.96022	1.22554e-07	1.78982e-06
orange1.1t03479	1.2938	7.3108	1.22968e-07	1.7922e-06
Cs8g07560	1.03476	8.70833	1.23883e-07	1.80424e-06
Cs2g13120	-1.26002	4.30769	1.28698e-07	1.86895e-06
orange1.1t02851	-2.24727	2.7114	1.28892e-07	1.87039e-06
Cs2g13300	3.12364	1.58295	1.29858e-07	1.88172e-06
Cs3g24285	2.00036	2.96877	1.31424e-07	1.90306e-06
Cs8g07470	1.56467	5.36543	1.32813e-07	1.92041e-06
Cs5g06980	1.17823	5.50229	1.33702e-07	1.93186e-06
Cs5g27080	-1.4004	4.33988	1.37912e-07	1.99126e-06
Cs1g10640	-1.49753	3.60451	1.44067e-07	2.07716e-06
Cs8g05800	-2.30063	1.37715	1.45402e-07	2.09342e-06
Cs7g07460	1.00819	4.75325	1.46936e-07	2.114e-06
Cs3g18090	3.22406	3.72062	1.48724e-07	2.13667e-06
Cs5g07220	1.08232	4.67671	1.50261e-07	2.1572e-06
Cs1g10610	1.39045	4.41257	1.5439e-07	2.21175e-06
Cs5g21900	2.75282	4.67651	1.56003e-07	2.23327e-06
orange1.1t05396	-2.17916	1.72223	1.56455e-07	2.23815e-06
Cs9g07680	1.25183	10.0481	1.58578e-07	2.2637e-06
Cs9g08000	1.25875	7.27562	1.60599e-07	2.29092e-06
orange1.1t02557	1.92203	3.03641	1.62531e-07	2.31684e-06
Cs5g04160	4.57359	0.199046	1.64851e-07	2.34659e-06
Cs1g08485	-1.42338	3.36405	1.65386e-07	2.35255e-06
Cs1g15670	1.03058	5.43739	1.65532e-07	2.35296e-06
Cs2g17890	1.04567	5.85282	1.68065e-07	2.38392e-06
orange1.1t03240	-1.14969	4.73721	1.68423e-07	2.38732e-06
orange1.1t05936	-1.29687	4.20521	1.70592e-07	2.41297e-06
Cs2g07350	-1.06222	4.71536	1.72132e-07	2.43304e-06
orange1.1t01255	-1.15467	4.71119	1.75378e-07	2.47718e-06
Cs3g18710	1.19279	4.1996	1.75578e-07	2.47828e-06
Cs6g20190	-1.09942	5.19396	1.75936e-07	2.48158e-06
Cs3g26940	-1.28375	4.24128	1.76274e-07	2.48462e-06
orange1.1t03313	-6.75033	-0.670574	1.7978e-07	2.52872e-06
Cs7g16660	1.25461	6.72279	1.85418e-07	2.6062e-06
Cs1g05100	-1.00073	4.98118	1.88665e-07	2.64815e-06
Cs3g12220	1.62098	3.66244	1.91329e-07	2.68366e-06
Cs9g07670	2.46939	9.96676	1.93828e-07	2.71494e-06
Cs5g06920	-1.44826	5.48371	2.00515e-07	2.8047e-06
Cs4g02190	-1.24784	3.64448	2.01219e-07	2.8126e-06
Cs2g21940	-1.29961	4.07375	2.03458e-07	2.84193e-06
orange1.1t03081	-1.65234	2.9754	2.05794e-07	2.87255e-06
Cs7g26250	-4.06757	0.104627	2.11116e-07	2.94276e-06
Cs4g18660	1.18318	4.8841	2.11719e-07	2.94913e-06
Cs7g08080	1.46666	3.3119	2.15776e-07	3.00149e-06
orange1.1t04113	-2.35966	1.8957	2.16933e-07	3.01342e-06
Cs4g10830	-2.25534	1.75341	2.17837e-07	3.02389e-06
orange1.1t02114	-1.27889	4.5723	2.19432e-07	3.04394e-06
Cs2g05450	3.65186	2.91996	2.21049e-07	3.06425e-06
Cs1g24950	1.51749	4.99109	2.21923e-07	3.07426e-06
orange1.1t00266	-1.14827	4.29971	2.33471e-07	3.22979e-06
Cs6g17360	-1.54584	3.31578	2.34994e-07	3.24863e-06
Cs5g13290	2.14898	2.38344	2.35501e-07	3.2534e-06
Cs4g06630	-1.6419	3.00381	2.35837e-07	3.25581e-06
Cs1g06830	1.31668	4.20918	2.36564e-07	3.26361e-06
orange1.1t00899	-1.05855	4.71444	2.53388e-07	3.48378e-06
Cs7g08370	-1.05976	4.62931	2.55189e-07	3.50615e-06
Cs3g24440	-2.20327	2.79428	2.66637e-07	3.65596e-06
Cs4g15590	-1.10791	6.69877	2.71959e-07	3.7264e-06
Cs1g11110	-1.10304	4.36263	2.72452e-07	3.73061e-06
Cs6g03770	-2.6818	1.21415	2.72886e-07	3.73402e-06
Cs7g26730	1.03836	4.91459	2.79416e-07	3.81819e-06
Cs3g19430	-1.01983	4.9622	2.81786e-07	3.84796e-06
Cs1g21580	-1.09279	4.66648	2.82873e-07	3.86018e-06
Cs6g09160	-1.47058	7.77967	2.84115e-07	3.87451e-06
orange1.1t01663	-1.39076	3.29639	2.89603e-07	3.94401e-06
Cs7g15480	-3.60208	4.51881	2.92994e-07	3.9848e-06
Cs2g06640	-1.54548	4.10412	2.94357e-07	3.99988e-06
Cs1g02860	-1.02989	4.58942	2.945e-07	3.99988e-06
Cs5g02430	-4.37325	0.629116	2.9476e-07	4.00031e-06
Cs4g02170	-1.06581	4.29444	2.98807e-07	4.04745e-06
orange1.1t05003	1.35591	3.79891	3.00519e-07	4.06518e-06
Cs7g26990	1.021	5.00769	3.01482e-07	4.07547e-06
orange1.1t03429	1.00838	5.21809	3.14636e-07	4.24474e-06
Cs2g10090	-1.13938	4.84549	3.20553e-07	4.31589e-06
Cs5g29020	1.00802	6.37104	3.35131e-07	4.49714e-06
orange1.1t01564	-1.99126	2.36426	3.42217e-07	4.58611e-06
orange1.1t02550	1.62099	4.41256	3.43593e-07	4.6015e-06
Cs2g11760	1.51037	4.06273	3.45982e-07	4.63041e-06
Cs2g07170	2.29469	4.84412	3.47621e-07	4.64926e-06
Cs8g17930	2.35361	2.4333	3.54269e-07	4.73503e-06
Cs6g07510	1.98707	4.48669	3.69661e-07	4.93093e-06
Cs9g07450	-1.09186	5.53201	3.72891e-07	4.96802e-06
Cs1g05200	1.03892	5.33043	3.72935e-07	4.96802e-06
Cs9g02120	-1.41429	3.22713	3.80061e-07	5.05906e-06
Cs9g08720	1.0716	4.48839	3.80271e-07	5.05906e-06
Cs5g20250	2.00284	2.47112	3.83763e-07	5.09878e-06
Cs3g27010	1.03279	7.12031	3.95724e-07	5.24041e-06
Cs8g10260	-1.05507	4.52466	4.06899e-07	5.38486e-06
Cs3g19260	-2.09471	2.39408	4.12917e-07	5.46006e-06
Cs4g06340	1.41063	4.25083	4.13124e-07	5.46006e-06
Cs8g07410	-1.07325	5.27036	4.17169e-07	5.50991e-06
Cs5g15790	-1.14977	4.6147	4.2179e-07	5.56e-06
Cs7g29480	1.08999	4.52554	4.2697e-07	5.61726e-06
Cs9g19180	1.14025	5.35332	4.2726e-07	5.61741e-06
orange1.1t01334	-1.11787	5.556	4.40108e-07	5.78255e-06
Cs2g22320	2.54108	2.28011	4.57406e-07	6.002e-06
Cs9g01010	-1.21339	3.6938	4.66761e-07	6.10883e-06
Cs1g13290	1.40432	4.71882	4.6874e-07	6.13075e-06
Cs2g13320	2.37508	3.20277	4.75646e-07	6.21704e-06
Cs6g20970	-1.40121	3.25821	4.88869e-07	6.38573e-06
Cs5g25760	2.70003	4.05007	4.95309e-07	6.46565e-06
Cs9g02490	1.37899	3.85538	4.97154e-07	6.48554e-06
Cs5g27900	-1.09287	4.1187	4.98381e-07	6.49734e-06
Cs5g21190	1.30532	3.77985	5.069e-07	6.5956e-06
Cs2g12180	2.43816	1.4866	5.07348e-07	6.59716e-06
Cs3g15780	1.22617	6.00758	5.14252e-07	6.67831e-06
Cs6g13570	-1.0395	4.36962	5.18331e-07	6.72262e-06
Cs7g10130	1.02013	5.46936	5.19511e-07	6.73358e-06
Cs9g02790	-4.40341	1.25044	5.30002e-07	6.86515e-06
Cs2g12700	-5.04399	0.152488	5.32839e-07	6.89746e-06
Cs7g01880	-4.3192	0.314898	5.35176e-07	6.92326e-06
Cs4g03830	-1.44619	3.39275	5.44144e-07	7.03475e-06
Cs2g18590	-1.16648	3.81001	5.84878e-07	7.55167e-06
Cs1g03820	-2.87888	0.571551	6.04392e-07	7.79364e-06
Cs8g14280	1.19885	6.75522	6.18089e-07	7.96516e-06
Cs6g16110	-1.32339	3.72091	6.40721e-07	8.24626e-06
Cs4g03520	-1.71139	2.59545	6.58358e-07	8.44179e-06
Cs2g13400	-1.01701	4.4028	6.59629e-07	8.45181e-06
Cs9g19340	-1.31126	3.7217	6.67147e-07	8.54271e-06
Cs3g16230	-1.09611	4.22975	6.91422e-07	8.84792e-06
Cs4g09240	-1.15109	3.87805	6.99991e-07	8.94808e-06
Cs1g22720	4.88832	0.0215371	7.00138e-07	8.94808e-06
Cs5g01570	1.52291	4.31197	7.10088e-07	9.058e-06
Cs1g25150	1.13304	4.74939	7.1244e-07	9.07652e-06
Cs1g14500	-1.41637	3.13709	7.23337e-07	9.20951e-06
Cs4g09800	-1.08963	5.02739	7.4319e-07	9.44437e-06
Cs7g07550	-1.03457	4.65934	7.44884e-07	9.45993e-06
orange1.1t01006	-1.72328	3.26553	7.46096e-07	9.46936e-06
Cs4g08440	-1.2057	3.78772	7.50421e-07	9.51825e-06
orange1.1t02237	-1.09063	3.95776	7.55499e-07	9.57663e-06
orange1.1t00747	1.00295	4.99929	7.69788e-07	9.73937e-06
Cs1g25850	-1.79905	3.19298	7.70755e-07	9.74548e-06
orange1.1t00297	-1.03041	4.42692	7.78884e-07	9.82975e-06
Cs8g14310	-1.3642	3.44131	7.80012e-07	9.83783e-06
Cs7g09380	-3.78698	-0.122995	7.82311e-07	9.86064e-06
Cs2g16620	-1.13822	4.33814	7.92138e-07	9.97826e-06
Cs9g07600	-1.11027	4.28256	8.0956e-07	1.0185e-05
Cs2g29540	1.30354	4.5541	8.15408e-07	1.02521e-05
Cs4g19700	-1.42441	2.88895	8.28372e-07	1.04022e-05
Cs8g04720	3.31733	0.82839	8.30628e-07	1.04175e-05
Cs3g24630	1.4454	3.99107	8.31478e-07	1.04217e-05
Cs1g23260	2.57463	0.951092	8.40533e-07	1.05155e-05
Cs6g16930	1.31113	3.7976	8.41165e-07	1.05169e-05
Cs8g02960	-1.127	3.85797	8.65679e-07	1.07966e-05
Cs2g24730	-1.711	3.67868	8.76731e-07	1.09277e-05
Cs4g09930	-1.52375	3.6077	8.98245e-07	1.11544e-05
Cs4g18330	1.1899	3.83834	9.01156e-07	1.11792e-05
Cs2g10630	-1.51744	5.93565	9.01355e-07	1.11792e-05
Cs4g18120	1.67645	8.77102	9.02316e-07	1.11843e-05
Cs2g05440	-1.07511	4.78791	9.38731e-07	1.15999e-05
Cs2g22660	3.11149	2.30855	9.49555e-07	1.17193e-05
Cs3g23050	2.77182	3.01951	9.52301e-07	1.17316e-05
Cs5g15150	-1.76512	3.27378	9.53466e-07	1.17388e-05
Cs9g09080	-1.3137	4.7777	9.72128e-07	1.19467e-05
Cs3g16350	1.05111	4.67661	1.00268e-06	1.22996e-05
Cs3g11790	1.07857	4.72239	1.00716e-06	1.23471e-05
Cs4g03940	1.28251	4.18832	1.03035e-06	1.26083e-05
Cs4g10360	-1.06883	4.04474	1.03749e-06	1.26803e-05
Cs2g07920	1.34573	4.04831	1.07783e-06	1.31176e-05
Cs6g07100	-1.0287	5.10533	1.10189e-06	1.33794e-05
orange1.1t00311	-1.13612	3.78525	1.1055e-06	1.34138e-05
orange1.1t05899	-2.25649	1.78404	1.1063e-06	1.34155e-05
Cs6g11935	-1.57752	3.54359	1.1119e-06	1.34639e-05
Cs9g01620	1.22074	4.59163	1.15203e-06	1.39114e-05
Cs8g08590	-1.1227	3.9074	1.15534e-06	1.3943e-05
Cs5g34060	1.44527	3.96525	1.18741e-06	1.42702e-05
Cs5g10190	-1.39993	3.26345	1.192e-06	1.42967e-05
Cs1g08490	-1.51642	3.2024	1.19246e-06	1.42967e-05
Cs3g24480	-2.22449	1.66797	1.19414e-06	1.43083e-05
Cs1g07950	1.1123	7.86151	1.20514e-06	1.4423e-05
Cs9g16960	-1.86721	2.83213	1.22797e-06	1.46441e-05
Cs1g14893	1.64473	2.86511	1.23391e-06	1.46997e-05
Cs4g04210	1.61411	3.86279	1.24249e-06	1.47822e-05
Cs5g09840	-1.46813	3.88857	1.25274e-06	1.48866e-05
Cs5g01290	-1.45463	3.81528	1.25767e-06	1.49363e-05
Cs5g08030	2.5739	1.01283	1.26526e-06	1.50176e-05
Cs2g12810	1.5984	2.98865	1.26802e-06	1.50327e-05
Cs4g10310	1.39805	5.58458	1.30041e-06	1.5397e-05
Cs7g21860	1.11214	4.10084	1.30236e-06	1.54035e-05
Cs8g20760	1.26618	5.0812	1.31518e-06	1.55277e-05
Cs7g30580	-1.18392	4.00393	1.32061e-06	1.55827e-05
orange1.1t02853	-1.74277	3.4493	1.32173e-06	1.55868e-05
orange1.1t00199	-1.1758	3.84056	1.32931e-06	1.5667e-05
Cs8g08460	-1.25926	3.30881	1.35881e-06	1.60054e-05
Cs2g07960	1.07423	4.11581	1.36143e-06	1.60268e-05
Cs4g02260	-1.48032	5.23655	1.39077e-06	1.6334e-05
Cs3g16330	-1.76803	2.43965	1.39961e-06	1.6411e-05
Cs7g08350	-2.45662	1.61726	1.40013e-06	1.6411e-05
Cs3g02980	1.04999	4.8864	1.40434e-06	1.6436e-05
Cs7g06850	-1.02573	4.33739	1.40605e-06	1.64464e-05
orange1.1t02791	-3.38313	0.370559	1.43629e-06	1.67806e-05
Cs5g16690	-1.30732	3.40677	1.44173e-06	1.68281e-05
Cs5g29680	-2.00479	1.94641	1.44455e-06	1.68478e-05
orange1.1t00416	2.95678	2.56004	1.44731e-06	1.68702e-05
Cs8g01410	-1.02846	4.28564	1.46124e-06	1.70031e-05
Cs2g14550	-1.18462	3.88541	1.46635e-06	1.70429e-05
orange1.1t01015	1.51375	2.82611	1.48345e-06	1.72316e-05
Cs3g08550	-2.03902	2.4835	1.49909e-06	1.73975e-05
Cs7g15980	-1.03326	4.2835	1.51975e-06	1.76228e-05
Cs6g13500	1.09418	4.40701	1.5266e-06	1.76819e-05
Cs4g04030	-1.13133	7.70816	1.53908e-06	1.78059e-05
Cs5g28280	4.0336	0.55999	1.56723e-06	1.81005e-05
Cs5g03530	2.83072	0.716262	1.56861e-06	1.8106e-05
Cs5g07690	1.12267	5.13786	1.57474e-06	1.81606e-05
Cs2g27520	1.67611	2.19141	1.57514e-06	1.81606e-05
Cs7g13370	-1.0273	4.31989	1.57664e-06	1.81674e-05
Cs5g27370	-3.37375	0.199271	1.62263e-06	1.86653e-05
Cs5g30640	1.22098	7.14321	1.62602e-06	1.86937e-05
Cs6g10310	-1.09428	4.52789	1.62889e-06	1.8716e-05
Cs3g23740	1.47167	3.73129	1.63815e-06	1.88009e-05
Cs6g18580	1.03252	5.05483	1.63992e-06	1.88105e-05
Cs2g07790	1.11942	4.29454	1.64254e-06	1.88259e-05
Cs2g20860	-1.05496	4.82069	1.64313e-06	1.88259e-05
Cs7g23080	1.41437	4.3163	1.70189e-06	1.94659e-05
Cs5g02200	-1.56352	2.41017	1.7357e-06	1.98188e-05
Cs2g13760	1.39033	3.82266	1.78721e-06	2.03609e-05
orange1.1t05657	1.95022	2.01247	1.80686e-06	2.05731e-05
Cs6g07340	-2.48557	1.30929	1.81819e-06	2.06787e-05
Cs1g22490	1.34241	3.99337	1.8335e-06	2.08175e-05
Cs1g22470	-1.72769	2.87691	1.86826e-06	2.11904e-05
Cs6g12830	-2.11771	2.62303	1.86844e-06	2.11904e-05
Cs7g25780	-2.04778	2.04616	1.87554e-06	2.12589e-05
Cs2g12280	-1.11719	4.09033	1.89782e-06	2.14752e-05
Cs4g03320	-3.73914	-0.161115	1.9106e-06	2.16077e-05
Cs4g10410	1.67951	4.22857	1.93996e-06	2.19151e-05
Cs1g15830	-1.07541	4.21899	1.99216e-06	2.24544e-05
orange1.1t05598	1.18756	4.20828	1.99917e-06	2.25208e-05
Cs6g03750	-1.53969	2.48104	2.00414e-06	2.25642e-05
Cs5g15190	-1.28355	8.48043	2.0565e-06	2.31021e-05
Cs2g24300	3.28724	1.6671	2.07784e-06	2.33158e-05
Cs7g32410	-2.22827	3.38878	2.10918e-06	2.3628e-05
Cs4g06580	-1.58718	3.1236	2.11886e-06	2.36874e-05
Cs6g11800	1.7473	2.80628	2.11919e-06	2.36874e-05
Cs4g11670	-2.15465	1.73218	2.17969e-06	2.43136e-05
Cs1g20820	-1.12919	5.7066	2.18004e-06	2.43136e-05
orange1.1t05518	1.245	4.95017	2.24355e-06	2.49666e-05
orange1.1t01117	-1.68974	2.70881	2.24614e-06	2.49817e-05
Cs8g04000	-5.07603	-0.488242	2.28943e-06	2.54069e-05
Cs2g07720	1.89728	7.65982	2.43722e-06	2.69137e-05
Cs7g13290	4.57296	1.40452	2.44091e-06	2.69396e-05
Cs5g03480	-4.03756	-0.24124	2.48577e-06	2.74047e-05
Cs2g04830	-1.01761	4.36039	2.60417e-06	2.86093e-05
Cs3g24280	4.35266	0.343594	2.60497e-06	2.86093e-05
Cs1g15050	-1.24514	3.5601	2.6352e-06	2.89097e-05
Cs5g27300	-1.06487	4.23742	2.64005e-06	2.89314e-05
Cs6g22260	2.40988	2.14888	2.66433e-06	2.91657e-05
Cs3g07760	-1.25772	4.11121	2.6913e-06	2.94369e-05
Cs2g27910	2.16376	1.65162	2.72492e-06	2.97642e-05
Cs6g07780	1.81391	3.35821	2.76852e-06	3.01914e-05
Cs9g02100	1.32077	4.61653	2.78517e-06	3.03566e-05
Cs1g03430	-1.35743	3.06557	2.80024e-06	3.05043e-05
Cs7g23810	-2.01733	2.90285	2.80854e-06	3.05781e-05
orange1.1t01749	1.8724	2.9555	2.83324e-06	3.08304e-05
Cs2g25500	-1.97316	2.11284	2.85781e-06	3.1081e-05
orange1.1t05946	2.97248	0.995101	2.91624e-06	3.1597e-05
Cs3g09000	2.84086	3.27075	2.94434e-06	3.18843e-05
Cs7g10000	-2.27066	1.22912	2.95843e-06	3.20198e-05
Cs5g05180	-1.59914	2.47428	2.9981e-06	3.24143e-05
Cs1g01500	-1.37718	3.09458	3.03788e-06	3.28091e-05
orange1.1t04009	1.00156	4.6888	3.06245e-06	3.30213e-05
Cs5g32840	-1.46676	3.07561	3.06824e-06	3.30661e-05
Cs8g19640	-1.0469	4.19697	3.10238e-06	3.33982e-05
Cs3g14590	-1.76712	3.66761	3.1625e-06	3.40206e-05
orange1.1t00286	1.57528	2.14859	3.16357e-06	3.40206e-05
Cs8g08600	1.60922	4.24079	3.17408e-06	3.40972e-05
Cs6g21550	1.23989	3.6106	3.21874e-06	3.45586e-05
Cs6g05690	-1.05413	4.26729	3.24307e-06	3.47827e-05
Cs4g18370	1.92342	2.82811	3.2826e-06	3.5188e-05
Cs3g22260	-2.16612	1.4926	3.34837e-06	3.57787e-05
Cs4g08990	1.08909	5.04856	3.39382e-06	3.62259e-05
orange1.1t05945	1.29773	3.52525	3.39603e-06	3.62303e-05
Cs7g10380	3.4636	0.583276	3.41063e-06	3.63669e-05
Cs7g10080	1.05959	4.3198	3.41354e-06	3.63786e-05
Cs7g10240	-1.42174	2.97967	3.44732e-06	3.66804e-05
Cs7g03500	-1.07301	4.05761	3.46996e-06	3.68823e-05
orange1.1t00611	2.60685	1.58371	3.57862e-06	3.79971e-05
Cs6g10840	7.18089	-0.326285	3.63025e-06	3.84238e-05
Cs2g08040	-1.2576	3.71105	3.71378e-06	3.92666e-05
orange1.1t00388	-1.07778	3.84345	3.73395e-06	3.94385e-05
Cs9g02040	1.19996	6.32335	3.76066e-06	3.96998e-05
Cs1g14896	1.70949	3.4511	3.80956e-06	4.01727e-05
Cs5g02160	-1.26111	3.54624	3.88131e-06	4.08024e-05
Cs3g17390	1.43735	6.51501	3.93842e-06	4.13596e-05
Cs7g25590	-1.27363	3.10691	3.95109e-06	4.14494e-05
Cs3g16530	-1.4414	3.00164	4.01786e-06	4.20405e-05
Cs6g20030	-2.51973	5.72982	4.07049e-06	4.25468e-05
Cs1g01220	-2.51025	0.960129	4.15645e-06	4.33778e-05
Cs7g27930	-1.07825	3.82863	4.25947e-06	4.44069e-05
Cs5g34230	2.72683	1.83907	4.32827e-06	4.50784e-05
Cs6g16790	-1.01501	4.32755	4.3691e-06	4.54558e-05
Cs4g12280	-2.69925	0.695149	4.39737e-06	4.57263e-05
Cs2g04330	1.31878	3.77649	4.4918e-06	4.6636e-05
Cs9g18530	-1.45593	3.0674	4.54883e-06	4.71186e-05
orange1.1t00635	1.25295	7.09319	4.56952e-06	4.72453e-05
Cs7g09540	-5.09046	1.27175	4.61696e-06	4.76635e-05
orange1.1t00050	1.5148	3.18776	4.62905e-06	4.77411e-05
Cs1g19730	-2.32509	1.54802	4.71744e-06	4.85285e-05
Cs3g04110	-1.83127	2.75872	4.7735e-06	4.90801e-05
Cs1g01180	1.91201	2.67327	4.80906e-06	4.93952e-05
Cs4g10110	-2.48613	3.89282	4.82301e-06	4.95132e-05
Cs2g08410	-1.0212	4.12611	4.89014e-06	5.01003e-05
orange1.1t00080	-1.2798	3.47045	4.93935e-06	5.05788e-05
Cs7g02250	1.64675	2.58313	4.96976e-06	5.08384e-05
Cs7g32250	-1.03137	3.89688	5.09775e-06	5.20231e-05
Cs8g16030	1.10334	4.63733	5.19161e-06	5.29197e-05
orange1.1t00419	1.56579	3.49359	5.21636e-06	5.31451e-05
Cs7g13120	1.70529	3.71503	5.26896e-06	5.36539e-05
orange1.1t00272	-6.34029	-0.978561	5.2918e-06	5.38592e-05
Cs7g26110	-1.33286	2.78892	5.33514e-06	5.42456e-05
Cs5g23830	1.33745	2.81885	5.34785e-06	5.43199e-05
Cs8g16440	-1.14926	3.35874	5.44554e-06	5.52286e-05
Cs3g21810	1.05871	4.34938	5.70916e-06	5.7641e-05
Cs8g07690	2.899	0.25831	5.74122e-06	5.79067e-05
Cs8g02940	-1.04385	4.54736	5.75085e-06	5.79747e-05
Cs3g08480	1.32304	3.21555	5.77247e-06	5.81345e-05
Cs1g06220	1.30043	3.58453	5.80218e-06	5.83463e-05
Cs3g25850	-1.58431	3.39852	5.84744e-06	5.87134e-05
Cs7g24940	1.67697	6.60458	5.85885e-06	5.87987e-05
Cs7g10180	-1.35806	2.96652	5.95145e-06	5.96983e-05
Cs5g27650	1.05916	6.45268	6.00254e-06	6.01807e-05
Cs2g10320	-1.68458	2.16427	6.01013e-06	6.02269e-05
Cs5g06830	-1.21558	3.4633	6.01598e-06	6.02545e-05
Cs3g11300	3.80967	-0.104033	6.07248e-06	6.07007e-05
Cs3g15460	-1.01099	6.92806	6.21823e-06	6.2046e-05
Cs4g16180	1.12685	5.11655	6.25703e-06	6.23364e-05
Cs4g13890	-1.13352	5.14339	6.28041e-06	6.25e-05
Cs2g13170	4.28721	0.287166	6.3334e-06	6.2934e-05
Cs7g12400	-4.76559	-0.726933	6.35109e-06	6.30787e-05
Cs1g26520	-1.24226	3.47652	6.42467e-06	6.37467e-05
Cs7g12330	1.38125	2.84069	6.5102e-06	6.44683e-05
Cs5g22130	-1.18821	3.60338	6.57257e-06	6.50219e-05
Cs2g03340	5.7585	0.0724081	6.59853e-06	6.52468e-05
Cs2g11540	-1.96367	1.66761	6.95834e-06	6.85019e-05
Cs8g01090	2.85708	1.94675	7.01952e-06	6.90704e-05
Cs3g16240	2.49185	2.52747	7.08324e-06	6.96634e-05
Cs8g15180	-1.10609	4.32708	7.095e-06	6.97449e-05
Cs3g15200	-1.45851	2.41007	7.21541e-06	7.07905e-05
Cs7g27620	3.2186	1.35076	7.23773e-06	7.09403e-05
Cs7g08170	-1.08347	3.73369	7.33181e-06	7.1688e-05
Cs3g27200	3.42181	0.0554991	7.42695e-06	7.25127e-05
Cs1g21920	-2.67502	1.55408	7.45699e-06	7.27002e-05
Cs7g06370	1.15232	4.88243	7.55708e-06	7.36404e-05
Cs7g12250	-1.39093	2.58905	7.56936e-06	7.37244e-05
Cs1g01310	1.24424	3.3397	7.59301e-06	7.38767e-05
Cs2g28220	-1.00857	3.86023	7.596e-06	7.38767e-05
Cs1g05350	1.96041	2.72155	7.60709e-06	7.39489e-05
Cs7g31360	1.63458	4.54645	7.65012e-06	7.43313e-05
Cs3g02720	-1.3675	3.44924	7.70479e-06	7.48264e-05
orange1.1t00353	-1.2601	2.98235	7.70991e-06	7.484e-05
Cs7g09050	4.5677	-0.241887	7.71509e-06	7.48542e-05
orange1.1t00362	-1.01004	4.00217	7.78307e-06	7.54048e-05
Cs2g15700	-2.69168	1.32968	7.83347e-06	7.5849e-05
Cs1g05420	-1.3769	2.82879	7.86734e-06	7.61114e-05
Cs9g15010	-1.31094	3.22009	7.93182e-06	7.66616e-05
orange1.1t02075	-2.14586	1.17554	8.072e-06	7.7867e-05
Cs7g07980	1.67836	2.16025	8.2644e-06	7.94566e-05
orange1.1t02461	-1.17036	3.66004	8.28019e-06	7.95324e-05
Cs1g26340	1.19531	4.86047	8.28806e-06	7.95478e-05
Cs1g24840	1.46598	3.91465	8.41566e-06	8.06798e-05
Cs4g10750	-1.74306	3.08044	8.45193e-06	8.09504e-05
Cs4g06380	-1.13398	3.47888	8.56935e-06	8.19971e-05
Cs2g22410	4.61952	-0.200758	8.58122e-06	8.20717e-05
Cs5g09560	2.9072	2.19886	8.60072e-06	8.22172e-05
Cs6g14250	-1.04345	3.8726	8.62254e-06	8.23495e-05
Cs9g14140	1.84122	3.75684	8.68796e-06	8.28172e-05
Cs6g10210	-2.04786	1.49917	8.69719e-06	8.28343e-05
Cs2g09430	-1.18457	3.31587	8.75392e-06	8.32884e-05
Cs6g21780	-1.41338	2.52966	8.86653e-06	8.42404e-05
Cs8g01470	1.09104	5.43959	9.02508e-06	8.5666e-05
Cs4g10930	1.20708	6.75712	9.10256e-06	8.63043e-05
Cs4g12130	1.54282	7.4378	9.10519e-06	8.63043e-05
Cs7g15410	-1.06034	3.56276	9.46885e-06	8.96248e-05
Cs3g23260	-1.08836	3.79289	9.64245e-06	9.11395e-05
Cs3g09040	-2.22607	1.46905	9.77502e-06	9.23059e-05
Cs6g17480	-2.09357	1.43609	9.96063e-06	9.39705e-05
Cs7g27880	-1.14977	3.60014	9.99656e-06	9.42653e-05
Cs5g12710	1.28135	3.04922	1.00063e-05	9.43126e-05
Cs6g20830	1.23258	5.5699	1.02934e-05	9.65835e-05
Cs6g02530	-1.17074	3.41676	1.02951e-05	9.65835e-05
orange1.1t04327	1.33026	4.82697	1.03502e-05	9.69644e-05
Cs4g10500	1.98476	2.07983	1.04278e-05	9.75552e-05
Cs7g12440	1.16831	6.03342	1.04609e-05	9.77292e-05
Cs8g20020	1.00676	5.84877	1.05378e-05	9.83898e-05
Cs1g19610	-1.21925	3.21369	1.05414e-05	9.83898e-05
Cs9g07610	-1.22125	3.10481	1.06266e-05	9.90932e-05
Cs3g19070	-7.25573	-0.262946	1.07524e-05	0.000100173
Cs2g10740	1.08415	4.55232	1.08455e-05	0.000100945
orange1.1t00363	-1.96589	1.0802	1.09047e-05	0.000101405
Cs2g14720	1.76384	4.66772	1.11067e-05	0.000103017
orange1.1t04633	-3.74333	1.39798	1.11858e-05	0.000103683
Cs5g25765	-1.20025	3.30341	1.11917e-05	0.00010369
orange1.1t03169	-2.073	0.941776	1.12887e-05	0.000104446
Cs3g09120	-1.39598	6.21251	1.13484e-05	0.00010495
orange1.1t00550	-1.02007	4.06035	1.13563e-05	0.000104974
Cs2g16580	-1.0861	3.91209	1.14105e-05	0.000105378
Cs3g19360	-1.05611	7.24935	1.16188e-05	0.000107154
Cs7g02270	1.68506	1.97337	1.18431e-05	0.000109123
Cs3g13940	1.21803	3.78349	1.18735e-05	0.000109303
Cs8g14260	-1.13265	3.30302	1.21467e-05	0.000111513
Cs7g28130	1.06022	4.81056	1.24191e-05	0.000113754
Cs9g08880	1.14887	5.13465	1.25329e-05	0.000114692
Cs9g15430	1.14544	6.17765	1.26263e-05	0.000115495
Cs6g12525	-1.30346	2.73246	1.26894e-05	0.000116019
Cs6g18380	1.32718	5.78787	1.31101e-05	0.000119594
Cs9g06060	2.71174	2.56291	1.31681e-05	0.000120068
Cs3g01870	-1.20211	3.40563	1.32317e-05	0.000120594
Cs3g14970	-1.06139	3.85531	1.34341e-05	0.000122328
Cs4g01030	-1.02958	3.7257	1.3449e-05	0.000122408
orange1.1t04594	1.63203	3.28741	1.35393e-05	0.000123175
Cs8g12710	2.92193	1.02997	1.37076e-05	0.00012465
Cs8g04350	1.30431	3.30502	1.37678e-05	0.000125141
orange1.1t01821	-4.12364	-0.58939	1.38889e-05	0.000126013
orange1.1t02174	1.39242	2.54785	1.39303e-05	0.000126275
Cs7g07930	2.0568	1.8674	1.40686e-05	0.000127414
Cs2g20400	-2.72901	2.31238	1.41205e-05	0.000127827
Cs7g29660	1.10393	4.8513	1.41603e-05	0.000128072
Cs8g04830	1.05213	4.76548	1.42e-05	0.000128373
Cs7g04400	-1.50713	2.42049	1.44254e-05	0.000130236
Cs9g10630	1.03006	6.76415	1.46956e-05	0.000132353
Cs7g17200	2.05015	0.876861	1.46994e-05	0.000132353
Cs6g16990	1.96914	1.23653	1.47574e-05	0.000132757
Cs3g25560	1.47432	2.21034	1.49244e-05	0.00013414
Cs5g06140	-6.82058	-0.61599	1.52272e-05	0.00013674
Cs5g05360	-1.80163	2.23599	1.53303e-05	0.000137587
Cs2g05600	2.15082	1.54775	1.53805e-05	0.00013787
Cs7g30170	-1.3662	3.0339	1.54647e-05	0.000138317
Cs6g12500	3.65027	-0.538036	1.5638e-05	0.000139619
Cs7g15470	-1.34494	6.27154	1.56681e-05	0.000139826
Cs2g25450	1.19746	3.83932	1.57485e-05	0.000140419
Cs3g11310	-1.02567	4.40635	1.5775e-05	0.000140531
Cs3g13830	1.84316	2.10898	1.58097e-05	0.000140778
Cs1g16850	1.79866	1.46175	1.58996e-05	0.000141515
Cs7g07830	-1.97002	1.27257	1.59303e-05	0.000141727
Cs2g04190	-1.62489	2.98225	1.59377e-05	0.000141729
Cs9g11690	-1.51705	2.62602	1.59799e-05	0.000142042
Cs3g26720	2.96957	0.183386	1.60918e-05	0.000142911
Cs1g12290	1.20323	3.65573	1.61694e-05	0.000143474
orange1.1t00612	3.94642	0.00427595	1.63193e-05	0.000144549
Cs1g06650	1.50943	2.30521	1.63753e-05	0.000144981
Cs7g05440	1.05138	4.89761	1.66044e-05	0.00014688
Cs1g14060	-1.13702	3.82593	1.66355e-05	0.00014709
Cs3g25470	-1.10488	3.30671	1.67826e-05	0.000148196
Cs9g04250	-1.29078	3.26365	1.68139e-05	0.000148363
Cs4g10580	1.46577	2.91931	1.71115e-05	0.000150704
Cs7g02720	-1.26723	3.62504	1.74289e-05	0.000153365
orange1.1t04360	-2.13893	2.24222	1.7838e-05	0.000156691
Cs7g30280	1.84733	5.09879	1.8076e-05	0.000158575
Cs4g12020	-2.46558	0.343332	1.82672e-05	0.000160182
orange1.1t02715	1.54292	3.468	1.82887e-05	0.000160255
Cs5g01400	-6.29162	-1.01341	1.82914e-05	0.000160255
Cs5g26210	-1.86968	1.4559	1.83689e-05	0.000160863
Cs1g18350	-1.3933	3.35506	1.85275e-05	0.000162182
Cs7g06180	-1.03365	3.85143	1.85721e-05	0.000162502
Cs7g14430	-1.43774	3.21619	1.86899e-05	0.000163462
Cs7g22600	-1.06456	4.12499	1.8953e-05	0.000165691
Cs3g02630	-1.48025	1.99971	1.91174e-05	0.000166983
Cs6g06910	-1.2482	2.94421	1.93183e-05	0.000168548
orange1.1t03698	-1.08806	3.85049	1.94253e-05	0.000169305
Cs2g30660	-1.44398	2.80451	2.00509e-05	0.00017423
Cs2g02310	-1.20377	6.38546	2.06216e-05	0.000178803
Cs7g31120	1.75246	1.45544	2.08374e-05	0.000180286
Cs5g09870	-1.40563	2.62021	2.08564e-05	0.000180373
Cs1g15120	-1.61976	1.84784	2.11396e-05	0.000182666
Cs8g01040	1.04984	4.97152	2.12588e-05	0.000183617
Cs5g07230	2.85281	5.46039	2.15829e-05	0.000186097
Cs1g09230	-2.45024	0.651392	2.16579e-05	0.000186664
Cs4g02300	-1.30208	2.52671	2.17415e-05	0.000187304
Cs6g15510	-1.147	3.18936	2.21246e-05	0.00019036
orange1.1t01837	1.56132	2.55641	2.21762e-05	0.000190712
Cs7g28970	-3.16867	0.0381838	2.23976e-05	0.000192299
Cs5g34930	-1.46257	2.91633	2.25137e-05	0.000193049
Cs7g31410	-1.78833	4.46964	2.2804e-05	0.000195288
Cs5g27290	-1.6115	3.16653	2.28529e-05	0.000195624
Cs1g02530	-1.54981	2.37419	2.31878e-05	0.000198154
Cs4g17540	-1.16283	3.87425	2.34638e-05	0.000200173
Cs8g16720	-1.20944	3.95221	2.36467e-05	0.000201392
Cs2g09630	-1.58227	2.27347	2.4138e-05	0.000205056
Cs5g01440	1.08653	3.95203	2.42156e-05	0.000205596
Cs9g01650	-1.23406	3.31534	2.4222e-05	0.000205596
Cs2g17210	-3.55415	-0.304621	2.45793e-05	0.000208278
Cs6g10520	1.17669	4.56135	2.46393e-05	0.000208698
Cs3g25430	-1.10017	3.47116	2.48358e-05	0.000210186
Cs3g18060	2.48849	4.67056	2.50582e-05	0.000211713
orange1.1t01595	-5.09993	1.28001	2.51348e-05	0.00021227
Cs8g18780	1.14574	4.97189	2.51996e-05	0.000212728
Cs5g19560	-1.45574	2.22491	2.53298e-05	0.000213738
Cs7g21490	2.59832	0.695209	2.53408e-05	0.000213742
Cs8g13780	-1.11991	3.36045	2.58987e-05	0.000218082
Cs1g15140	-1.98026	1.27998	2.60564e-05	0.000219226
Cs2g08370	-1.14501	3.20629	2.60937e-05	0.000219449
Cs6g20090	1.03409	3.68448	2.62969e-05	0.000221065
Cs9g06000	-1.73341	1.69496	2.72993e-05	0.000228919
Cs8g17250	-1.00321	3.82024	2.76526e-05	0.000231178
Cs5g30560	-1.08356	3.39395	2.76959e-05	0.000231282
Cs2g22915	-1.01396	3.66255	2.79603e-05	0.000233178
orange1.1t04050	1.05105	4.42124	2.82653e-05	0.000235548
Cs1g11350	1.11982	7.91334	2.84722e-05	0.000237174
Cs9g14490	1.71975	2.03373	2.85576e-05	0.000237787
Cs4g08290	-1.02184	3.9154	2.86349e-05	0.000238332
Cs6g12040	-1.07935	3.58455	2.90048e-05	0.000241212
Cs1g16000	-2.24031	5.68374	2.92373e-05	0.000243045
Cs5g01600	-1.19816	3.17398	2.94448e-05	0.000244598
Cs6g11430	1.16735	5.3467	2.95119e-05	0.000244957
Cs1g02000	1.05166	3.64568	2.95159e-05	0.000244957
Cs6g16130	-2.27853	1.71072	2.97364e-05	0.000246685
Cs3g09180	-3.15311	0.329707	2.97627e-05	0.0002467
Cs2g04800	-2.80418	0.695614	3.02836e-05	0.000250502
Cs1g24010	1.75726	2.79097	3.12179e-05	0.000257658
Cs3g24360	1.59374	1.82874	3.12254e-05	0.000257658
orange1.1t01599	2.23001	2.53662	3.14082e-05	0.00025906
Cs1g06810	-1.21576	3.36585	3.15189e-05	0.000259867
orange1.1t03262	1.18721	3.35169	3.18628e-05	0.000262166
Cs2g10380	1.04758	3.82749	3.19977e-05	0.000263168
Cs5g33540	1.50593	4.33928	3.21051e-05	0.000263836
Cs5g25410	-5.12886	0.227381	3.22974e-05	0.000265091
Cs4g11700	3.29303	0.137137	3.26159e-05	0.00026727
Cs1g22330	-1.06379	3.42689	3.30355e-05	0.000270599
Cs7g25460	-1.00374	4.23375	3.30917e-05	0.000270949
Cs7g06130	1.36276	3.26365	3.32335e-05	0.000271889
Cs2g09760	-1.42703	2.13283	3.39148e-05	0.000276576
orange1.1t03315	-1.08794	3.4727	3.39164e-05	0.000276576
Cs9g14190	-2.06063	1.377	3.41239e-05	0.000278043
Cs2g13670	1.83148	2.35354	3.43907e-05	0.000279878
orange1.1t03152	-1.7165	2.69464	3.45911e-05	0.000281395
Cs1g12440	1.40124	2.05522	3.46356e-05	0.000281643
Cs5g06670	-1.53338	3.03622	3.49037e-05	0.00028348
Cs7g08980	-1.67591	1.62955	3.62378e-05	0.000293605
orange1.1t04063	-1.36271	2.44899	3.63453e-05	0.000294147
orange1.1t01748	-1.14096	3.97468	3.63883e-05	0.000294351
Cs2g03140	-1.09263	4.52447	3.67463e-05	0.000297008
Cs3g19630	2.96331	0.536073	3.69818e-05	0.000298433
Cs2g10930	-3.46672	-0.371173	3.70314e-05	0.000298713
Cs5g01480	-4.43513	-0.348467	3.73515e-05	0.000300934
Cs9g18720	3.04557	0.243906	3.81171e-05	0.000306719
Cs8g15290	-6.13682	-1.12291	3.81305e-05	0.000306719
Cs1g24440	1.15047	9.35834	3.82266e-05	0.000307369
orange1.1t04133	1.98534	2.64792	3.8517e-05	0.000309457
Cs2g23790	4.19079	-0.538242	3.89508e-05	0.000312568
Cs5g03710	-1.10159	3.45726	3.94643e-05	0.000316437
Cs8g14400	-1.33843	2.54177	3.99553e-05	0.000319992
Cs7g02310	-1.33094	2.61816	3.9972e-05	0.000319999
Cs9g10650	-3.071	0.913914	4.01555e-05	0.000321085
Cs5g17530	-1.35299	3.88628	4.05261e-05	0.000323662
orange1.1t03544	-1.70346	1.84809	4.07265e-05	0.000325005
Cs6g04550	-1.8147	2.12474	4.12201e-05	0.000328553
Cs5g06320	-1.60411	2.45287	4.12759e-05	0.000328868
Cs3g08110	-1.07462	3.45866	4.19096e-05	0.00033339
Cs2g11140	-1.41146	1.99974	4.19446e-05	0.000333536
Cs2g14250	-6.24246	-1.04887	4.2996e-05	0.000341224
Cs5g15410	-1.06128	3.30509	4.31076e-05	0.000341974
Cs1g23440	-1.01095	4.07354	4.4398e-05	0.000351934
Cs2g16940	-1.22935	2.81165	4.48792e-05	0.000355329
Cs3g11320	-1.25885	3.13114	4.49334e-05	0.000355532
orange1.1t02078	1.205	3.09457	4.49402e-05	0.000355532
Cs1g03210	-2.17083	1.65702	4.53654e-05	0.000358614
Cs2g11520	3.14381	0.571597	4.56207e-05	0.00036035
orange1.1t05120	1.1956	2.98194	4.57968e-05	0.000361599
Cs2g20950	-4.01232	-0.261635	4.58833e-05	0.000361998
Cs8g11500	1.79524	2.55675	4.60258e-05	0.000362696
Cs7g13090	-1.28114	2.96707	4.63342e-05	0.000364311
Cs9g07530	3.00784	0.343069	4.63754e-05	0.000364311
Cs9g02190	-1.07846	9.09587	4.63987e-05	0.000364352
Cs9g15130	-6.18982	-1.08558	4.64647e-05	0.000364728
Cs9g18360	-1.12634	4.36579	4.6796e-05	0.000367043
Cs3g11050	1.35032	4.07426	4.74927e-05	0.000371639
Cs9g17240	3.95677	-0.30476	4.81256e-05	0.000376445
Cs7g05320	-1.49756	2.09245	4.89553e-05	0.000382341
Cs7g31060	1.11906	4.50924	4.8996e-05	0.00038251
Cs4g15210	3.15361	0.462275	4.93785e-05	0.000385347
Cs2g31260	1.87943	3.58283	4.97761e-05	0.000387931
Cs3g10220	-1.30124	2.97335	5.05854e-05	0.000393242
Cs7g22970	-1.14677	3.08065	5.06632e-05	0.000393696
Cs4g19360	-1.26217	3.1797	5.0801e-05	0.000394462
Cs9g01090	-2.69054	0.214382	5.16807e-05	0.000400984
Cs4g11820	-1.89532	2.93167	5.20075e-05	0.000403208
Cs7g08740	-1.02441	3.39556	5.22867e-05	0.000405061
Cs4g07450	-1.13965	3.35206	5.23648e-05	0.00040551
Cs3g01585	1.50996	8.14758	5.47034e-05	0.000423132
Cs7g03240	-2.99074	0.560182	5.55936e-05	0.000428865
Cs2g02050	1.06504	3.49614	5.57414e-05	0.000429812
Cs3g17310	-1.35269	2.48688	5.57792e-05	0.000429812
Cs6g08855	-1.57703	4.15112	5.67534e-05	0.000436475
Cs3g24810	6.18901	-1.08573	5.72587e-05	0.000440024
Cs9g09700	-1.19095	4.07831	5.77994e-05	0.000443841
Cs6g11460	-1.31226	5.96667	5.79775e-05	0.000444718
Cs2g31040	-3.08676	2.38749	5.82643e-05	0.00044673
Cs2g18980	1.35508	2.55393	5.84027e-05	0.000447621
Cs9g07410	-1.50439	1.80385	5.86981e-05	0.000449543
Cs6g21230	-2.24071	0.809466	6.00808e-05	0.000459259
Cs2g05640	1.45702	2.24021	6.1702e-05	0.000470937
Cs7g12910	1.38998	4.29754	6.26399e-05	0.000477733
Cs5g02780	-1.01301	3.78914	6.4212e-05	0.000488613
Cs3g22920	-1.02656	3.40715	6.45441e-05	0.000490954
Cs6g14710	-1.3413	2.43354	6.46231e-05	0.000491185
Cs2g12940	1.39055	4.49927	6.47257e-05	0.000491779
Cs2g04440	-1.08017	3.27329	6.51166e-05	0.000494376
Cs7g01640	-1.10296	3.25466	6.53085e-05	0.000495536
Cs1g23520	-1.6424	1.82375	6.53187e-05	0.000495536
Cs3g09030	-2.23773	1.28743	6.5648e-05	0.000497472
Cs3g25940	-1.15675	3.23853	6.64649e-05	0.000503284
Cs9g16870	2.55392	1.36391	6.80868e-05	0.000514598
Cs5g09230	-1.19549	4.16406	6.82819e-05	0.000515781
orange1.1t01365	2.1616	1.14506	6.84472e-05	0.000516547
Cs3g27870	-1.49119	2.9802	6.85452e-05	0.000517093
Cs2g28800	1.00654	4.35573	6.92847e-05	0.000522121
Cs2g08540	-6.02139	-1.20125	6.93338e-05	0.000522121
Cs5g32270	2.73412	1.8441	6.93534e-05	0.000522121
Cs1g06940	-1.94866	1.42336	6.93673e-05	0.000522121
Cs2g06630	1.30074	3.6962	6.9871e-05	0.000524932
Cs2g14490	-1.50077	2.22918	6.99641e-05	0.000525435
Cs4g17260	1.1267	5.64709	7.07968e-05	0.000530699
Cs5g09050	-1.18167	3.0297	7.09831e-05	0.000531898
Cs3g16490	1.72544	1.54186	7.30226e-05	0.000546165
Cs1g18530	2.3164	0.747916	7.3086e-05	0.000546233
Cs9g18390	4.60213	-0.847347	7.32202e-05	0.000547033
Cs2g14400	1.23663	2.58314	7.37831e-05	0.000550626
orange1.1t00554	-1.31632	2.29782	7.38484e-05	0.000550751
orange1.1t02758	-1.01471	5.22698	7.39726e-05	0.000551223
orange1.1t00001	-1.2612	2.65728	7.44958e-05	0.000554711
orange1.1t02118	2.654	0.487157	7.53799e-05	0.000560673
Cs1g21040	-1.59221	1.94144	7.60311e-05	0.000564682
Cs1g11900	2.04772	0.923718	7.61197e-05	0.000564924
Cs8g03980	-2.60534	1.09659	7.64281e-05	0.000566586
Cs5g11570	1.15237	7.01972	7.84762e-05	0.000579849
orange1.1t02723	2.98147	-0.283441	7.86821e-05	0.000580731
Cs3g26240	1.19717	5.44541	8.06409e-05	0.000593787
Cs8g14090	-1.61896	2.70104	8.06574e-05	0.000593787
Cs2g13060	-1.6886	1.9375	8.17889e-05	0.000601897
Cs8g07280	-5.96302	-1.24149	8.20985e-05	0.000603734
Cs2g28420	-2.80189	0.60591	8.23822e-05	0.000605379
Cs2g28590	-1.23387	3.23605	8.41219e-05	0.000617487
Cs2g14440	-2.93026	0.153134	8.43612e-05	0.000619018
Cs7g17335	1.17894	2.85783	8.57902e-05	0.000628618
Cs4g11560	-1.04306	3.38239	8.66582e-05	0.000634485
Cs5g03240	-1.22339	2.96494	8.69577e-05	0.000636216
Cs6g09320	2.24641	1.58924	8.80115e-05	0.000643458
Cs5g31660	1.58932	2.65686	8.81977e-05	0.000644473
Cs5g32740	1.60598	8.39611	8.93225e-05	0.00065186
orange1.1t01487	-1.00123	4.16661	9.01536e-05	0.000657449
Cs1g18190	-1.0759	4.47496	9.12514e-05	0.000664733
Cs2g08250	-1.5759	2.2403	9.14577e-05	0.000665995
Cs7g11680	-1.80418	1.65171	9.15997e-05	0.000666723
Cs5g04140	3.43763	-0.393685	9.16239e-05	0.000666723
Cs3g20790	3.00817	-0.0858514	9.18888e-05	0.000667815
Cs9g18100	-1.38416	2.16015	9.19942e-05	0.000668211
Cs3g17090	1.49611	2.43612	9.27634e-05	0.000673312
Cs7g23150	-1.1302	2.84802	9.28775e-05	0.000673897
Cs8g17460	1.11377	3.11659	9.35746e-05	0.000677491
Cs3g13430	-1.3672	3.07216	9.37546e-05	0.000678368
Cs7g12650	-1.89896	1.1833	9.42706e-05	0.000681305
Cs3g22730	-1.3165	2.80393	9.46199e-05	0.00068334
Cs4g18220	-1.65878	2.24033	9.48962e-05	0.000684938
Cs8g05040	-3.30861	-0.488515	9.64767e-05	0.000694879
orange1.1t00384	2.15489	0.90475	9.65148e-05	0.000694879
Cs7g18230	-1.59525	1.49915	9.66151e-05	0.000695256
Cs6g09420	1.19716	4.1766	9.67922e-05	0.000696282
Cs3g16370	2.65649	0.886685	9.71709e-05	0.000698756
orange1.1t03274	-4.72472	-0.756386	9.75986e-05	0.000701331
Cs5g28310	3.71804	0.798917	9.90022e-05	0.000710151
Cs3g18070	2.60856	6.84774	9.93418e-05	0.000712333
Cs5g03620	1.66648	2.55151	0.00010178	0.000728257
Cs6g11150	-1.53703	1.93755	0.00010203	0.000729792
orange1.1t03155	-1.10422	3.77546	0.000102433	0.000732155
Cs8g19720	1.45849	4.19449	0.000103708	0.000740268
orange1.1t00434	-1.43235	3.01956	0.000105771	0.000752744
Cs7g17340	1.41041	2.98932	0.0001058	0.000752744
Cs9g06110	-3.47	-0.670335	0.000106003	0.000753473
Cs1g10440	-4.31588	-1.0489	0.000106011	0.000753473
Cs8g08990	-1.27216	2.31576	0.000106014	0.000753473
Cs7g12870	1.43123	5.51437	0.000106108	0.00075382
orange1.1t04938	-1.84932	2.31969	0.000107281	0.000761401
orange1.1t05430	-5.96229	-1.24163	0.000108518	0.000769636
Cs9g02350	-1.204	2.95143	0.000109716	0.000777861
Cs3g07940	-1.22677	3.58205	0.000109892	0.00077883
Cs3g13670	2.53033	0.301631	0.000110014	0.000779424
Cs2g10640	-1.47402	2.26592	0.0001102	0.000780464
Cs5g19570	1.07701	3.04042	0.000110885	0.000784851
Cs5g34010	-4.36684	-1.01357	0.000112691	0.000795725
Cs5g22880	2.24275	1.07179	0.000114073	0.000804499
Cs5g30490	-1.92815	1.20571	0.000115785	0.000815149
Cs3g18490	-1.02469	4.87319	0.000116205	0.000817537
Cs5g03630	-2.14908	2.03519	0.000116673	0.000820253
Cs6g16590	-2.80313	0.410498	0.000117872	0.000827525
Cs2g15000	-1.77294	1.44274	0.000118228	0.00082974
Cs2g30870	1.58215	2.16778	0.000119504	0.000837319
Cs2g07240	1.34708	8.37455	0.000119516	0.000837319
Cs3g12935	-2.67858	1.0967	0.000121145	0.000847259
orange1.1t05294	-2.26167	1.72784	0.000121268	0.000847826
Cs8g07010	-1.42048	1.81915	0.000123342	0.000861729
Cs1g19760	-2.09745	1.25795	0.000124145	0.000866432
Cs1g02580	-1.48928	2.03843	0.000125803	0.000877093
orange1.1t00122	-1.358	2.46833	0.000126616	0.000882458
Cs9g07120	-1.15086	2.97373	0.000127242	0.000886515
Cs1g02590	-1.03693	3.47267	0.000128752	0.000896413
Cs7g07480	4.12317	-0.589491	0.000129176	0.000898746
Cs8g01080	-1.0054	3.53092	0.000130472	0.000907132
Cs7g21570	1.05797	4.66255	0.000131316	0.000912059
Cs7g06460	-1.06569	3.33465	0.000131576	0.000913234
Cs9g09100	-1.46318	2.06775	0.000132156	0.000916314
Cs6g08260	-2.20544	0.995054	0.000132226	0.000916483
Cs7g13740	-1.66284	1.93765	0.0001327	0.000919448
Cs9g06040	3.2924	-0.048974	0.000133753	0.000925155
Cs2g19370	-1.32379	2.87681	0.000134743	0.000931045
Cs7g04040	-1.54696	2.48622	0.000135623	0.000936434
Cs2g03330	1.5536	2.30836	0.000137335	0.000946583
Cs6g21080	-2.43983	0.41072	0.000138297	0.000952662
Cs4g08380	7.81154	0.213173	0.000139122	0.000957289
Cs4g10260	-1.13566	3.01247	0.00013974	0.000960298
Cs4g17600	3.03286	-0.0669817	0.000139958	0.00096147
Cs5g18600	-1.44493	2.31218	0.000141215	0.000969356
Cs6g10490	1.92838	0.737573	0.000142194	0.000975498
Cs4g11610	-2.39786	0.748097	0.000142254	0.000975583
Cs2g17160	2.64648	2.65427	0.000142393	0.000976199
Cs8g14120	1.279	6.95863	0.000148978	0.00101553
orange1.1t03483	-1.05919	3.4237	0.000148986	0.00101553
Cs6g14040	2.06963	0.43649	0.00014925	0.00101698
orange1.1t04286	1.13065	3.20816	0.000151078	0.00102804
Cs7g04120	-4.22087	-0.513691	0.000152151	0.001035
Cs5g02770	-1.37439	2.49073	0.000153158	0.00104149
Cs3g23540	-2.9538	-0.304625	0.000155417	0.00105579
Cs3g12600	6.08072	-1.16145	0.000156597	0.0010634
Cs9g05160	-1.01626	3.72493	0.000160136	0.00108638
Cs4g08750	1.33232	4.24713	0.000160897	0.00109081
Cs7g12100	1.5136	3.01317	0.000162401	0.00110063
Cs2g05605	1.08827	4.35361	0.000163221	0.00110545
Cs3g14240	2.44472	2.22918	0.000163769	0.00110841
Cs7g25030	2.0725	1.64047	0.000163915	0.00110903
Cs5g02920	2.20751	0.995109	0.000165108	0.00111635
Cs7g30070	-3.31064	-0.241921	0.000165552	0.0011186
Cs2g20020	-1.1772	3.1909	0.000165817	0.00112001
Cs4g14600	-1.40281	3.045	0.000170089	0.00114695
Cs1g19740	-1.31938	3.85893	0.000170579	0.00114948
Cs7g13180	1.62372	2.21339	0.000170863	0.00115063
orange1.1t02482	1.01171	3.86599	0.000171624	0.00115459
Cs6g12340	-1.77651	1.67909	0.00017231	0.00115882
Cs3g12380	-2.2975	0.53587	0.000173377	0.00116483
Cs2g16630	1.11482	3.27485	0.000174276	0.00117009
Cs7g11810	-1.02092	3.64632	0.000177821	0.00119191
Cs2g01260	-1.11917	3.15826	0.000178446	0.0011957
orange1.1t00214	3.12056	2.38023	0.000181254	0.00121209
Cs5g11130	2.20717	2.89287	0.000183701	0.00122608
Cs3g25360	-1.01435	3.15462	0.000183745	0.00122608
Cs1g04370	1.26265	2.35714	0.000183853	0.00122621
Cs2g02830	2.35423	0.167943	0.000185196	0.00123436
Cs6g19110	3.75043	-0.46399	0.000187247	0.00124679
Cs5g34700	-1.20031	3.36034	0.000190614	0.00126711
Cs5g35030	-2.94433	-0.513158	0.000191727	0.00127325
Cs5g25380	-1.03625	2.99337	0.000194342	0.0012891
Cs9g13460	1.02727	5.13513	0.00019445	0.00128921
Cs8g10910	-1.7849	0.986866	0.000197535	0.00130751
Cs1g04920	-2.70782	0.618368	0.000197681	0.00130804
Cs1g19550	-1.26396	2.41409	0.00019857	0.00131306
Cs8g19105	-1.56256	2.62616	0.000198808	0.00131378
Cs9g18760	3.31248	-0.241903	0.000199125	0.00131544
Cs7g03020	1.34181	2.33945	0.000200726	0.00132471
Cs9g17250	1.03153	7.53746	0.000201217	0.00132752
Cs9g09640	1.52607	4.98263	0.000203605	0.00134108
Cs5g04130	-1.06063	3.38426	0.000204356	0.0013447
Cs9g07230	1.4307	3.35498	0.000204659	0.00134626
Cs6g10620	-1.00219	3.21015	0.000205223	0.00134897
Cs9g18120	-1.45584	2.46804	0.00020646	0.00135633
orange1.1t01783	1.51266	1.71151	0.000206929	0.00135853
Cs6g13640	2.04451	4.51684	0.000207096	0.00135918
Cs4g09450	2.19015	0.524019	0.000211269	0.00138332
Cs3g15140	-1.37932	2.84796	0.000211427	0.00138332
Cs5g06510	1.08477	5.81794	0.000211468	0.00138332
Cs7g01260	4.26221	-1.08557	0.000212137	0.0013864
orange1.1t04497	-1.07714	3.35858	0.00021385	0.00139623
Cs4g06710	-2.39563	0.199012	0.000216709	0.00141169
Cs7g30845	-1.36305	4.15368	0.000217566	0.00141636
Cs5g19840	1.7927	1.56532	0.000218131	0.00141866
Cs4g18280	1.32899	3.87823	0.000219212	0.00142523
Cs5g31690	-1.0499	3.38191	0.000222055	0.00144139
Cs8g18850	-2.34863	0.342938	0.000224993	0.00145765
orange1.1t01777	-1.20806	2.81372	0.000225735	0.00146151
Cs7g26900	-2.35656	0.716357	0.000225867	0.00146189
Cs3g11700	-2.32643	1.03784	0.000228631	0.00147802
Cs7g25980	-1.41025	2.49387	0.000228703	0.00147802
Cs4g18380	1.08418	3.69616	0.000228726	0.00147802
Cs7g25680	1.3739	7.55342	0.000229646	0.00148302
orange1.1t05944	1.83076	1.54226	0.00023072	0.001489
[truncated: 887 more rows]

## Sheet: 190vs210 Brown
Gene_ID	logFC	logCPM	PValue	FDR
Cs2g26590	-3.77561	4.85625	6.43525e-49	1.31807e-44
Cs7g20030	-4.0932	4.60087	2.98348e-41	3.05538e-37
Cs1g02750	4.03252	4.97321	6.706e-37	4.57841e-33
orange1.1t04613	3.11458	5.42233	3.03767e-34	1.55544e-30
Cs7g31930	2.86248	4.87115	2.08221e-30	8.52957e-27
Cs5g16360	2.83984	5.42638	5.73374e-29	1.95731e-25
Cs2g22100	-3.54339	5.60755	1.61491e-24	4.72524e-21
orange1.1t00580	2.52883	6.70202	2.25197e-23	5.76562e-20
Cs1g03700	-6.77738	3.77399	5.68295e-23	1.29331e-19
Cs9g15430	3.63042	5.39448	1.06753e-21	2.18651e-18
Cs2g26610	-3.45504	3.89451	2.24415e-20	4.17861e-17
orange1.1t02947	2.00148	5.5421	2.61854e-17	4.46942e-14
Cs8g17520	1.92437	6.70736	2.34309e-16	3.69162e-13
Cs3g14550	1.91909	7.20091	8.62621e-16	1.18372e-12
Cs1g13620	1.87467	9.64495	8.66899e-16	1.18372e-12
Cs3g21730	-2.0161	5.63916	2.63752e-15	3.37635e-12
Cs5g21690	2.03109	4.54691	2.8623e-15	3.44856e-12
orange1.1t03042	1.76924	5.27332	7.05461e-15	7.63171e-12
orange1.1t00436	1.66758	5.93623	7.0795e-15	7.63171e-12
Cs6g12870	1.662	8.65496	1.14891e-14	1.1766e-11
Cs5g08910	-2.94375	4.03615	1.62308e-14	1.58305e-11
orange1.1t04360	-3.1206	4.0455	5.90772e-14	5.50008e-11
Cs5g33130	-1.8146	4.68893	5.36338e-13	4.77621e-10
orange1.1t00542	-3.04318	3.68267	7.28547e-13	6.21754e-10
Cs6g10120	-3.72461	6.0844	7.59868e-13	6.22545e-10
Cs6g09960	1.72828	10.2699	1.5539e-12	1.22411e-09
Cs7g29570	-2.85519	4.29504	2.179e-12	1.65297e-09
Cs3g03045	-3.0303	3.07748	2.8253e-12	2.06671e-09
Cs8g07330	-4.13905	1.95774	3.00977e-12	2.08895e-09
orange1.1t02003	-1.83568	5.82256	3.05968e-12	2.08895e-09
Cs1g16390	2.31226	4.4444	4.0395e-12	2.66893e-09
Cs5g19060	1.61788	8.32891	4.96802e-12	3.17985e-09
Cs9g17380	2.82823	8.16923	5.38385e-12	3.34158e-09
Cs1g12300	-7.81938	2.84192	5.7805e-12	3.48224e-09
Cs6g04060	1.50763	5.77619	6.56465e-12	3.84163e-09
Cs3g03135	-2.8341	3.56709	7.03145e-12	4.0005e-09
Cs9g19340	-1.49696	5.27776	9.1928e-12	5.08884e-09
Cs2g20010	-2.01681	6.85251	9.72569e-12	5.24215e-09
Cs5g23840	3.23589	4.22111	1.93008e-11	1.01364e-08
Cs2g31050	3.3035	1.8916	3.1344e-11	1.60497e-08
Cs3g14610	1.54898	5.62285	4.71818e-11	2.30812e-08
Cs9g10630	1.5292	5.68134	4.73965e-11	2.30812e-08
Cs5g21700	2.14036	3.56574	4.84568e-11	2.30812e-08
orange1.1t00571	2.12123	3.53383	5.17407e-11	2.40853e-08
Cs4g02910	1.71233	5.60501	1.08907e-10	4.95694e-08
Cs5g25950	1.70784	5.50134	1.23639e-10	5.50518e-08
Cs5g02430	-4.04599	3.2617	1.56017e-10	6.79901e-08
orange1.1t01983	1.36285	5.45242	2.32997e-10	9.94216e-08
Cs9g10530	-1.57867	4.97338	3.93579e-10	1.64516e-07
Cs5g06140	-5.44758	1.42972	4.2683e-10	1.74847e-07
orange1.1t03043	1.68678	4.25085	5.16745e-10	2.07529e-07
orange1.1t04497	-1.47153	5.2833	5.30466e-10	2.08942e-07
Cs2g09840	1.87487	4.2382	1.25046e-09	4.83242e-07
Cs4g17300	-1.44673	4.64927	1.28964e-09	4.89155e-07
Cs3g18090	-3.794	4.74294	1.75151e-09	6.52263e-07
orange1.1t00590	-4.42465	0.784984	2.1737e-09	7.95031e-07
Cs7g28340	-2.12508	5.4259	2.96903e-09	1.06687e-06
Cs8g09350	-2.60843	2.49695	3.24157e-09	1.14472e-06
Cs5g25740	2.40033	3.60554	3.48242e-09	1.19523e-06
Cs7g08110	-4.42285	1.67091	3.50131e-09	1.19523e-06
Cs3g27360	1.27985	5.68073	3.7297e-09	1.25232e-06
orange1.1t02321	-1.61806	5.07071	4.88938e-09	1.61523e-06
Cs1g19320	-1.42191	6.65745	5.22684e-09	1.6993e-06
Cs7g06330	-2.57265	6.12257	7.69663e-09	2.46316e-06
Cs5g22950	1.64267	3.94487	8.42087e-09	2.65348e-06
Cs3g05310	3.39412	1.85586	8.92388e-09	2.76938e-06
Cs9g07670	2.73275	6.55551	1.04303e-08	3.18857e-06
Cs2g19010	-1.1953	6.56435	1.24307e-08	3.74419e-06
Cs9g04630	-2.00605	4.50291	1.38897e-08	4.12302e-06
Cs3g06840	-1.54681	5.32911	1.49634e-08	4.37828e-06
Cs1g13300	-3.36526	1.78495	1.67242e-08	4.82457e-06
Cs3g09510	1.60468	3.93148	1.73275e-08	4.92165e-06
orange1.1t01704	2.67566	1.73595	1.76679e-08	4.92165e-06
Cs7g30580	-1.6993	5.18343	1.77816e-08	4.92165e-06
Cs4g13640	-1.46448	4.76451	1.93151e-08	5.27483e-06
Cs2g22040	-2.40613	3.30324	2.11402e-08	5.64244e-06
orange1.1t02532	7.28956	-0.135342	2.12122e-08	5.64244e-06
Cs7g20060	-2.21911	2.56839	2.31924e-08	6.0901e-06
orange1.1t01353	-1.73073	6.56504	2.38431e-08	6.18169e-06
Cs3g07660	-7.06384	-0.315004	3.39671e-08	8.69642e-06
Cs8g05460	-1.31895	5.04723	3.62391e-08	9.08362e-06
Cs7g15320	-1.98293	6.32776	3.63664e-08	9.08362e-06
Cs4g16680	-1.92858	3.19138	4.13078e-08	1.01936e-05
Cs2g13280	-2.13483	3.92772	4.31572e-08	1.04542e-05
Cs2g06150	-1.1638	5.29757	4.33848e-08	1.04542e-05
Cs1g02740	1.28165	5.44742	4.41984e-08	1.05264e-05
Cs4g08360	-2.71363	2.95778	4.5132e-08	1.06252e-05
Cs1g20120	2.75999	2.88909	4.88249e-08	1.1364e-05
Cs5g25690	-1.88975	5.61526	5.09755e-08	1.17312e-05
Cs6g22150	1.50987	3.75933	5.3047e-08	1.20723e-05
orange1.1t04404	1.13386	7.37707	5.87752e-08	1.3229e-05
orange1.1t01736	-4.19898	3.18294	6.10001e-08	1.35805e-05
orange1.1t05560	-3.12425	1.90465	6.56296e-08	1.4454e-05
Cs5g06250	-1.25661	4.51075	7.25073e-08	1.57779e-05
Cs5g32270	-2.50023	2.58465	7.38991e-08	1.57779e-05
Cs2g03110	-2.0349	9.28327	7.39519e-08	1.57779e-05
Cs1g19840	-1.1418	6.13366	7.71562e-08	1.62919e-05
Cs7g19720	-3.09344	1.04283	8.6113e-08	1.79976e-05
Cs5g25680	-1.60097	5.12266	8.70066e-08	1.80007e-05
Cs2g22050	-2.94656	1.29995	9.72316e-08	1.97365e-05
Cs1g26330	1.25989	6.01417	9.73239e-08	1.97365e-05
Cs6g07970	1.43798	10.0892	1.05282e-07	2.1141e-05
orange1.1t04221	-3.24985	1.85886	1.18546e-07	2.33819e-05
Cs6g03520	-1.56948	3.84722	1.18725e-07	2.33819e-05
Cs3g21790	1.38239	8.05728	1.25236e-07	2.44293e-05
orange1.1t00634	2.82008	4.9525	1.29506e-07	2.5024e-05
Cs4g06710	-2.83199	2.56269	1.3157e-07	2.51852e-05
Cs2g08540	-3.36939	1.08759	1.35262e-07	2.56523e-05
Cs5g15150	-1.50813	4.48364	1.40899e-07	2.64761e-05
Cs6g09030	1.35945	4.39817	1.45819e-07	2.71516e-05
orange1.1t05522	-1.63682	7.85763	1.70884e-07	3.12836e-05
Cs8g06470	-1.06698	6.60259	1.71066e-07	3.12836e-05
Cs9g03570	1.18732	7.3935	1.99315e-07	3.61272e-05
Cs6g19640	1.09405	6.66564	2.07171e-07	3.72218e-05
Cs2g06490	-4.49474	0.575477	2.12263e-07	3.7805e-05
Cs8g07400	3.91655	2.13313	2.33253e-07	4.11853e-05
Cs3g25420	1.25091	9.42146	2.53119e-07	4.4311e-05
orange1.1t00573	-3.73482	1.59401	2.66638e-07	4.62821e-05
Cs7g31500	-5.45332	2.88201	3.24187e-07	5.57984e-05
Cs2g17570	-1.38268	5.70095	3.35408e-07	5.72485e-05
orange1.1t00589	-2.1903	2.0334	3.41021e-07	5.77255e-05
Cs2g17980	-1.2903	7.16483	4.09036e-07	6.84953e-05
Cs2g30710	1.11456	6.75558	4.11333e-07	6.84953e-05
orange1.1t03567	2.83359	1.64361	4.5542e-07	7.52251e-05
Cs7g12850	1.86394	2.71903	4.90485e-07	8.03689e-05
Cs4g04480	1.05175	6.55244	5.00265e-07	8.08029e-05
Cs6g13860	-2.11655	3.61798	5.01024e-07	8.08029e-05
Cs1g15830	-1.32593	5.12984	5.15566e-07	8.24986e-05
Cs2g23280	-2.60561	6.76146	5.34665e-07	8.48915e-05
Cs4g17220	-4.70058	0.417072	5.40124e-07	8.50986e-05
Cs7g08730	-1.36489	4.70258	5.59282e-07	8.74444e-05
Cs1g13850	1.04739	7.07196	5.85464e-07	9.08445e-05
Cs9g02540	-2.22569	2.34057	6.46423e-07	9.95491e-05
Cs7g07120	-1.43487	6.10763	6.69215e-07	0.000102277
Cs7g22420	-1.33438	5.41746	6.74126e-07	0.000102277
orange1.1t03349	1.03738	6.29365	7.05148e-07	0.000106197
Cs7g06120	1.85092	3.51387	8.73202e-07	0.000130547
Cs7g09200	-1.27833	4.20062	8.92585e-07	0.000132478
Cs7g26690	-4.58183	-0.119998	9.02576e-07	0.000132997
Cs2g15230	1.20645	5.26779	9.09085e-07	0.000132999
Cs3g19060	-2.15766	8.23542	9.2687e-07	0.000134639
Cs1g09575	-4.13341	0.269671	1.3187e-06	0.000190208
Cs2g31410	2.62502	2.17904	1.44168e-06	0.000206493
Cs3g02125	-2.40662	2.10054	1.46945e-06	0.00020901
Cs5g19990	-4.763	3.54257	1.56142e-06	0.000220558
Cs5g25760	2.46842	2.58577	1.63105e-06	0.000228817
Cs6g13330	1.62818	3.11728	1.73031e-06	0.000241089
Cs7g05360	1.25424	4.90961	1.78825e-06	0.000247479
Cs7g30820	1.17678	4.37607	1.83179e-06	0.000251803
Cs5g25900	1.27331	5.32732	1.88005e-06	0.000256715
Cs1g23450	-1.66052	4.5554	1.89453e-06	0.000256978
Cs4g08090	-1.33976	3.85153	2.15272e-06	0.000290079
Cs4g03330	1.35272	7.39537	2.44933e-06	0.00032789
Cs1g10540	-1.32724	5.9556	2.4802e-06	0.000329867
Cs5g33940	-1.40151	4.17563	2.54997e-06	0.000336958
Cs2g08460	1.01096	8.33986	2.5776e-06	0.000338425
Cs2g30865	-1.30017	3.92994	3.11942e-06	0.00040438
Cs4g05980	-5.42172	-0.0993218	3.20213e-06	0.000412491
Cs5g03170	2.39232	2.46142	3.25608e-06	0.000415251
Cs4g09550	-1.10991	7.65118	3.2784e-06	0.000415251
Cs7g25720	2.35311	2.14906	3.28438e-06	0.000415251
Cs4g10560	-6.55335	-0.71437	3.69918e-06	0.000464826
orange1.1t01469	-2.07462	2.15624	3.9046e-06	0.000487647
Cs4g16200	-1.74382	4.54978	3.94658e-06	0.000489596
Cs7g13230	-4.55954	3.77829	3.96802e-06	0.000489596
Cs9g11730	-2.8486	0.7527	4.15783e-06	0.000509944
Cs9g16350	-5.00237	-0.435887	5.17238e-06	0.000626868
Cs1g22620	1.07879	7.60036	5.33186e-06	0.000642395
Cs2g28960	1.09655	5.60901	5.65639e-06	0.00067622
Cs9g07420	-1.39072	5.11242	5.67863e-06	0.00067622
Cs2g18590	1.31733	3.70844	5.89351e-06	0.000697344
Cs3g07940	-1.05992	4.99217	5.92412e-06	0.000697344
Cs3g06820	1.46382	3.84245	6.10424e-06	0.000711899
Cs7g22555	-1.25231	4.38536	6.11728e-06	0.000711899
Cs8g14690	-1.4552	4.27703	6.60749e-06	0.000764602
Cs8g04550	-2.53966	3.57347	6.7958e-06	0.000781975
Cs1g06850	-1.65592	2.72449	6.9249e-06	0.000792379
Cs8g08720	1.27088	4.50001	7.02443e-06	0.000799302
Cs1g13640	-1.7922	2.3555	7.16262e-06	0.000810524
Cs8g18970	-1.01372	5.41699	7.94376e-06	0.000893978
Cs9g10790	-4.79133	-0.596709	8.31945e-06	0.000930892
Cs1g21210	1.50838	3.06387	8.36267e-06	0.000930892
Cs6g22390	-3.06155	1.01543	8.48453e-06	0.000934302
Cs9g18240	-7.06176	-0.315809	9.03027e-06	0.00098908
Cs8g14150	1.53959	9.44207	9.27363e-06	0.00101033
Cs2g03950	1.74098	2.91083	9.42541e-06	0.00102144
Cs1g23710	-1.1557	4.28415	9.77965e-06	0.00105425
Cs5g04020	1.07751	4.96942	1.03995e-05	0.00110939
Cs2g28420	-2.57631	2.86125	1.04746e-05	0.00111161
Cs9g17050	1.94886	2.77207	1.0651e-05	0.0011245
Cs5g29870	-1.49186	3.1728	1.07623e-05	0.00113042
Cs4g04210	-2.81723	5.78556	1.08782e-05	0.00113677
Cs7g23240	1.11975	4.30771	1.12247e-05	0.00116703
Cs1g19160	-5.21357	-0.269018	1.14025e-05	0.00117777
Cs4g08750	-1.5934	4.98902	1.1443e-05	0.00117777
Cs2g06470	-3.13318	4.83192	1.17282e-05	0.00120109
Cs8g09720	1.02864	9.1846	1.2059e-05	0.00122882
Cs5g27370	-2.15952	1.25384	1.21872e-05	0.00123574
Cs7g12610	-3.48397	5.04677	1.2605e-05	0.0012718
Cs2g28370	1.09651	7.31833	1.27989e-05	0.00128392
Cs7g12600	-1.91322	4.13429	1.28912e-05	0.00128392
Cs8g05250	-1.80211	2.51843	1.29131e-05	0.00128392
Cs1g01220	-2.12574	3.34663	1.37904e-05	0.00136452
Cs1g21920	-2.07368	3.67077	1.41723e-05	0.00139556
orange1.1t03142	-4.18135	2.08393	1.47192e-05	0.00143561
Cs4g13440	-1.86067	3.82044	1.59937e-05	0.0015452
Cs8g13950	-6.18375	-0.983183	1.63263e-05	0.00156347
orange1.1t01577	-6.37962	-0.842745	1.63354e-05	0.00156347
Cs8g19980	1.14369	4.59634	1.65024e-05	0.0015721
Cs9g17330	-2.04013	3.78409	1.68856e-05	0.00160116
Cs3g27050	-4.03983	-0.541057	1.70647e-05	0.00161069
Cs9g03190	-1.27318	4.43889	1.80896e-05	0.00169183
Cs3g25140	3.55807	0.258583	1.95959e-05	0.00180794
orange1.1t03773	-1.05461	5.50929	2.04069e-05	0.00187432
Cs9g10760	-3.26371	0.222604	2.08023e-05	0.00190211
Cs8g09730	1.51274	5.42101	2.24722e-05	0.00203661
Cs8g04830	1.17577	3.78745	2.30545e-05	0.00207686
Cs2g12100	1.11004	7.6823	2.31191e-05	0.00207686
Cs9g14480	-1.26669	6.02356	2.39217e-05	0.00213958
Cs6g15570	-1.44305	3.46364	2.42239e-05	0.0021479
Cs6g07310	-4.53266	-0.160615	2.42245e-05	0.0021479
orange1.1t02719	-1.52048	7.62092	2.78937e-05	0.00246258
Cs5g04260	-6.882	-0.461328	3.00572e-05	0.00258669
Cs6g18930	-3.63294	0.836934	3.11281e-05	0.00265653
Cs9g07720	1.85612	1.81178	3.14632e-05	0.00267398
Cs5g18500	-1.77889	4.36259	3.22106e-05	0.00271497
Cs5g09370	1.50036	5.05198	3.26279e-05	0.00273887
orange1.1t03040	1.05924	5.45634	3.34711e-05	0.00279818
Cs4g03320	-2.56279	1.88484	3.4412e-05	0.00286515
Cs4g16860	1.37979	4.77224	3.60503e-05	0.00298135
Cs7g01980	-3.4144	1.55618	3.60987e-05	0.00298135
Cs1g24060	1.00213	7.50998	3.69227e-05	0.00303715
Cs2g10570	1.17448	6.13347	4.06002e-05	0.00331304
Cs2g14720	-1.21681	4.17903	4.12122e-05	0.00334515
Cs9g19170	-1.04498	6.70288	4.13204e-05	0.00334515
Cs4g15270	-1.02398	9.65748	4.16196e-05	0.00335611
Cs1g06470	-1.1456	4.26118	4.28486e-05	0.00344166
Cs5g32440	1.05197	4.95196	4.39326e-05	0.00351495
Cs5g03440	1.06814	8.08416	4.41939e-05	0.0035221
Cs1g01700	-1.03652	8.95904	4.4607e-05	0.00354048
Cs7g16240	-1.21514	3.92942	4.67462e-05	0.00367417
Cs2g13230	-1.12199	4.50126	4.70535e-05	0.00367417
Cs8g02450	-1.11368	6.52527	4.71473e-05	0.00367417
Cs5g06720	1.17324	8.20365	4.71783e-05	0.00367417
orange1.1t00272	-2.75799	0.485639	4.75863e-05	0.0036919
Cs2g09850	1.44787	4.49703	4.77739e-05	0.00369247
Cs2g30260	1.06748	7.46078	4.90364e-05	0.0037758
Cs5g10770	2.18912	2.1407	5.07734e-05	0.00389491
Cs5g08460	-1.11857	3.78306	5.19935e-05	0.00397363
Cs2g14940	-1.37146	4.1529	5.24755e-05	0.00399555
orange1.1t00617	-2.22767	2.36317	5.32209e-05	0.00403504
orange1.1t05042	2.62327	1.99	5.37396e-05	0.00404667
Cs6g09480	-1.71552	2.28089	5.40948e-05	0.00405485
orange1.1t05409	-1.43914	2.65817	5.42442e-05	0.00405485
Cs3g01590	-2.97894	0.550598	5.56831e-05	0.0041353
Cs7g09440	-1.2574	3.59704	5.57891e-05	0.0041353
Cs5g30100	-1.12985	5.80101	5.59261e-05	0.0041353
Cs5g03580	-1.55118	3.72031	5.62161e-05	0.00414179
Cs6g14100	-3.42428	-0.292039	5.77285e-05	0.00423797
Cs4g07080	3.86679	-0.680847	5.91369e-05	0.00432586
Cs2g30590	-1.07455	6.49306	6.09829e-05	0.00444503
Cs2g21940	1.43085	3.94606	6.36497e-05	0.00461617
Cs7g05180	-4.49346	0.574869	6.37817e-05	0.00461617
Cs2g01210	-1.39509	3.9631	6.42803e-05	0.00463587
Cs1g23670	-1.18354	9.02184	6.49214e-05	0.00464669
Cs2g24030	-2.03542	1.60048	6.51108e-05	0.00464669
Cs9g08730	-1.01794	6.70502	6.69952e-05	0.00475198
Cs1g24710	-2.20935	1.15667	6.70503e-05	0.00475198
Cs3g11620	-1.28458	3.29248	6.75646e-05	0.00477193
Cs3g17400	1.56558	2.20665	6.81316e-05	0.00479543
Cs1g22410	-1.84392	2.44312	6.94736e-05	0.00487314
orange1.1t02029	-1.69014	5.15205	7.07039e-05	0.00494252
orange1.1t05017	1.7023	3.86444	7.33962e-05	0.00510529
Cs3g23860	-4.30884	0.909444	7.36176e-05	0.00510529
orange1.1t01397	-2.01902	3.39454	7.37802e-05	0.00510529
Cs2g10720	1.07588	4.91823	7.5351e-05	0.00517899
Cs4g19660	-1.37303	5.23906	7.80653e-05	0.00532978
Cs4g13020	-1.01453	6.35151	8.12513e-05	0.00551056
Cs4g15440	-2.42829	1.74118	8.38546e-05	0.00566835
Cs4g06630	-1.35771	4.43841	8.76821e-05	0.00589116
Cs8g07520	2.68971	0.194327	8.77259e-05	0.00589116
Cs9g02530	-1.06631	8.21478	9.05982e-05	0.00606416
Cs5g14110	-1.58051	1.98785	9.27825e-05	0.00619013
orange1.1t03244	-7.06476	-0.314708	9.41034e-05	0.00625788
Cs8g06620	-4.90169	-0.513876	9.4519e-05	0.00626517
Cs5g25590	-5.15262	-0.315874	9.8683e-05	0.00649911
Cs2g22610	-3.03023	1.67004	9.90666e-05	0.00650347
Cs2g03220	1.43667	3.65732	9.9751e-05	0.00652747
Cs7g09540	-4.61307	0.343798	0.00010134	0.00661035
Cs7g22920	-2.15474	1.66096	0.000102219	0.00664652
Cs7g11620	-1.35338	7.18444	0.000104116	0.0067484
Cs3g09820	1.03286	6.2018	0.000105012	0.00677355
Cs3g20070	-4.03849	-0.541391	0.000112699	0.00723607
orange1.1t00521	-1.28453	3.13968	0.000116209	0.00743808
Cs1g10500	-1.0178	4.18212	0.000119189	0.00758308
Cs3g14730	2.27201	3.15684	0.000119215	0.00758308
Cs4g05370	7.33185	1.59891	0.00012269	0.007756
Cs7g11210	1.08823	5.39233	0.000123384	0.00777584
Cs2g22260	-6.55461	-0.713991	0.000125789	0.00790308
Cs4g06030	-2.18102	0.817851	0.00012644	0.00791973
orange1.1t00177	-2.1186	0.828514	0.000126846	0.00792093
Cs2g20140	-1.08141	4.03693	0.000128306	0.0079635
orange1.1t01564	-1.41296	3.47873	0.000129343	0.00800362
Cs4g02390	-3.80071	-0.714405	0.000131293	0.00809983
Cs2g29820	3.05704	0.349228	0.000133498	0.00821111
orange1.1t03382	1.15956	4.57551	0.000135426	0.00830477
Cs8g04300	-3.0609	0.728926	0.000137143	0.00838499
Cs2g28870	-5.80449	0.222317	0.000140445	0.00853586
orange1.1t01401	-1.07419	3.70491	0.000141237	0.0085586
Cs6g03280	-1.10505	7.86462	0.000144394	0.00869845
Cs5g02830	-6.07437	-1.05905	0.000146149	0.00877045
Cs9g14040	-1.09538	5.72242	0.000146445	0.00877045
Cs7g15360	1.23	3.31258	0.000147062	0.0087817
Cs1g05030	-1.14633	4.42828	0.000147523	0.00878362
Cs2g29090	-2.6318	0.752139	0.000149493	0.00882398
Cs2g18830	-1.87118	5.47909	0.000152182	0.00893119
orange1.1t01599	-1.71829	2.44022	0.000153271	0.00896939
Cs9g06660	-1.78995	1.28511	0.00015611	0.00908367
Cs5g30830	-1.07456	4.21958	0.000156613	0.0090871
Cs4g15260	-1.44125	3.8101	0.000158207	0.00915368
Cs8g19010	-1.46288	2.66438	0.00016244	0.00937209
Cs3g16430	2.23844	1.34352	0.000163443	0.00940347
Cs3g06740	-1.97	2.3888	0.000165342	0.00948611
Cs5g25410	-2.49343	1.22867	0.000166325	0.00950427
Cs8g03940	-1.81543	2.28893	0.000166587	0.00950427
Cs8g04610	-1.27197	4.40857	0.000167151	0.00950997
Cs9g03590	-2.97036	2.42613	0.000171052	0.00967816
Cs7g29030	-3.1205	-0.513992	0.000174529	0.00983181
Cs8g06630	-3.24907	0.987752	0.000174728	0.00983181
orange1.1t00235	-1.39346	2.56947	0.000177187	0.00994284
Cs5g10550	1.75357	8.79007	0.000181513	0.0101578
Cs7g27910	1.29561	2.83291	0.000182344	0.0101765
Cs3g12510	-1.59962	2.61026	0.000184703	0.0102624
Cs2g07600	1.03061	4.2087	0.000184885	0.0102624
Cs4g03870	-4.33745	-0.315023	0.000190169	0.0104845
Cs3g03350	-3.75792	-0.744897	0.000199015	0.0109282
Cs2g03080	-2.22083	0.588909	0.00020489	0.011164
Cs7g18040	1.28716	3.18635	0.000204944	0.011164
Cs5g20110	3.69323	2.44336	0.000206537	0.0111752
Cs9g06010	2.86626	1.5685	0.000206752	0.0111752
Cs9g07560	-1.25031	5.03215	0.000206786	0.0111752
Cs1g12950	5.69104	0.111664	0.000217061	0.0116689
Cs6g17500	-1.56556	5.02694	0.000223441	0.0119761
Cs3g18780	-6.25863	0.621848	0.000224145	0.0119761
orange1.1t02713	-1.52022	3.48704	0.000224531	0.0119761
orange1.1t03827	-1.52792	3.29085	0.000226338	0.012034
Cs6g12430	-1.96598	3.28815	0.00022679	0.012034
Cs6g13230	-6.5544	-0.71406	0.00023106	0.0122288
Cs8g05940	-2.07627	1.75296	0.000232527	0.0122748
Cs6g19340	-1.50913	2.5938	0.000237751	0.0124862
Cs1g15990	-2.16908	1.17338	0.000239114	0.0125256
Cs1g21585	-1.16649	3.4968	0.000240026	0.0125413
Cs5g25920	1.53634	4.40893	0.000241252	0.0125512
Cs2g11290	-2.07883	1.27676	0.000241693	0.0125512
Cs6g15210	-1.49748	5.7773	0.000242052	0.0125512
Cs3g08920	-2.31639	1.08838	0.000243811	0.0126104
Cs5g30390	-2.05186	1.92514	0.000249	0.0128233
orange1.1t00255	-3.00717	1.53735	0.000252721	0.012973
Cs7g30280	-1.03788	4.38027	0.00025641	0.0131295
Cs7g04110	-2.48973	0.719727	0.000257727	0.013164
Cs3g25380	1.12594	4.41929	0.000268556	0.013683
Cs4g04240	-5.9561	-1.1391	0.000273642	0.0138731
orange1.1t02046	-1.73984	3.14998	0.000279376	0.0141288
Cs6g06240	-3.53406	-0.51365	0.000284281	0.0143062
Cs7g06030	-1.54882	7.56389	0.000287612	0.0144031
Cs5g13890	-6.07584	-1.05868	0.000293215	0.0146122
Cs2g17100	-1.29822	5.4042	0.000295296	0.0146129
Cs2g31150	-2.12248	2.62863	0.00029537	0.0146129
Cs3g04110	-1.41081	3.61354	0.000300371	0.0148234
Cs5g17920	-1.60774	6.25954	0.000305715	0.01498
Cs6g11570	-1.70239	5.60155	0.000306685	0.0149917
Cs3g14590	-1.13158	4.16439	0.000313277	0.0152775
Cs7g19210	-2.25568	2.27552	0.000317423	0.0154429
Cs9g10970	-2.48824	0.173374	0.0003229	0.0156721
Cs2g16200	-1.46826	3.87832	0.000334037	0.0160982
Cs7g14940	1.81612	2.83038	0.000338409	0.0162325
Cs3g16510	3.41843	-0.311447	0.000341527	0.0163438
Cs5g12190	-1.23611	3.55578	0.000354677	0.0169335
Cs2g06890	-1.02077	5.28821	0.000359643	0.0171164
Cs4g17320	-1.51023	3.64446	0.000361144	0.0171226
Cs5g30185	2.97719	0.144529	0.000362329	0.0171391
Cs4g13160	-1.12616	5.69614	0.00038526	0.0181022
Cs6g14840	-1.53781	2.38109	0.000387068	0.0181417
Cs7g14960	-3.62436	-0.139557	0.00038936	0.0181798
Cs8g08710	-1.67279	1.99644	0.000389656	0.0181798
Cs1g16670	-1.56182	4.28543	0.000394293	0.0183012
Cs1g09610	-2.70444	0.445177	0.000394938	0.0183012
Cs1g05650	-5.32987	1.83847	0.000396522	0.0183331
Cs2g01990	3.67525	0.711904	0.000398767	0.0183954
Cs7g31975	-1.25248	5.00695	0.000406463	0.0187083
Cs8g17950	-2.34142	0.26993	0.000432421	0.0197257
Cs7g01700	-1.6402	1.99273	0.000436655	0.0198746
Cs9g06490	1.27633	5.99585	0.000444705	0.0201596
orange1.1t02143	-1.37337	2.38484	0.000444884	0.0201596
Cs8g17390	-1.26128	5.67091	0.000449221	0.0201646
Cs7g23810	-1.46658	4.40965	0.000449253	0.0201646
Cs2g29430	-1.51928	2.78035	0.000449605	0.0201646
Cs4g15330	-1.0395	4.00937	0.000449919	0.0201646
Cs7g15770	-1.54091	2.01537	0.000451659	0.0201984
Cs8g12710	-1.98488	0.838539	0.000456099	0.0203268
Cs1g03210	-1.30104	3.349	0.000456514	0.0203268
Cs5g09870	-1.13901	3.59727	0.000468305	0.0208065
Cs8g06880	-1.40484	2.38125	0.000470279	0.020849
Cs2g07660	-1.66197	6.31774	0.000478409	0.0211204
Cs3g07150	-6.4264	-0.809173	0.000480054	0.0211204
orange1.1t04099	1.21194	3.46627	0.000480382	0.0211204
orange1.1t04376	1.08882	11.8737	0.000480525	0.0211204
Cs6g15930	-3.18387	-0.0214845	0.000484544	0.0212515
Cs3g12560	-4.13695	-1.05912	0.000487788	0.0213074
Cs3g27200	-2.99908	-0.362496	0.000488882	0.0213074
Cs5g04690	-2.17006	1.17376	0.000489981	0.0213074
orange1.1t02791	-1.61943	2.35297	0.00049408	0.0214401
Cs3g19070	-2.79268	0.796575	0.000495987	0.0214774
Cs8g02230	2.62505	0.144169	0.000504979	0.0217747
Cs3g09900	-1.33772	2.61937	0.000517579	0.0221316
Cs5g26910	-6.94496	-0.410991	0.0005242	0.0223681
orange1.1t03813	-2.6723	1.25999	0.000530513	0.0225435
Cs8g08680	-4.6347	-0.713885	0.000542496	0.0229101
Cs8g19390	-1.32868	2.68722	0.000543787	0.0229174
orange1.1t03325	1.5053	4.88552	0.000559534	0.0234364
Cs9g13460	1.17814	4.18442	0.000565642	0.0236438
Cs5g33980	-1.61757	1.60066	0.000575759	0.0239203
Cs5g18370	-2.04561	0.389147	0.00057852	0.0239863
Cs7g30610	-1.58999	3.10228	0.000588159	0.0242388
Cs9g02790	-3.10765	3.24221	0.00060123	0.0247277
Cs2g12490	-2.732	-0.181409	0.000606713	0.0248038
Cs2g13310	-2.43631	1.63475	0.000610654	0.0248656
Cs4g12120	-1.77557	2.74196	0.000637412	0.0257119
Cs2g11570	2.11732	0.567843	0.000637487	0.0257119
orange1.1t04983	-1.35853	5.37852	0.000641204	0.0257119
Cs1g15660	2.79903	0.605317	0.000641682	0.0257119
orange1.1t00587	-1.703	1.22217	0.000643991	0.0257119
Cs9g16490	-3.48177	-0.247613	0.000645941	0.0257396
Cs4g04790	-3.04416	-0.568352	0.000653076	0.025923
Cs5g16230	-2.88524	1.18158	0.000659153	0.0261137
Cs1g01330	-4.93628	-0.487285	0.000673201	0.0265675
Cs5g17520	-1.77481	1.63767	0.000677075	0.0266577
Cs3g24360	-1.51586	1.84409	0.000678091	0.0266577
Cs9g14230	-1.18648	4.11617	0.000680069	0.0266593
orange1.1t02914	1.12448	3.38972	0.000681983	0.0266593
orange1.1t03247	-3.15864	-0.487595	0.000683338	0.0266593
orange1.1t02774	-5.52724	-1.41037	0.000686452	0.0266791
Cs6g07920	1.07943	8.41661	0.000689773	0.0267351
Cs8g17160	1.1719	6.43325	0.00069404	0.0267709
Cs2g02550	-1.9178	0.890091	0.000713921	0.027431
Cs5g26290	-2.39351	2.31921	0.00073649	0.0280386
Cs5g24680	-1.18041	8.18834	0.000770209	0.029268
Cs2g07330	-1.80934	2.1185	0.000773203	0.0292731
Cs2g08110	-1.13496	4.90478	0.000776392	0.0293123
Cs6g17190	-1.38441	4.98232	0.0007771	0.0293123
Cs9g16810	1.40499	3.47229	0.000811197	0.0303747
Cs9g14500	-1.97644	1.42352	0.000822024	0.0306679
Cs9g03000	-1.33226	4.52405	0.000853085	0.0317112
Cs7g10040	1.22806	2.87491	0.000873923	0.0323099
Cs1g15670	-1.12425	6.35505	0.000878072	0.0324048
Cs1g15940	-5.44203	-1.46088	0.000884116	0.0324822
Cs7g29040	-1.7711	1.08773	0.000884928	0.0324822
Cs7g02880	-1.09662	3.90836	0.000890323	0.0325668
Cs2g13040	-3.65261	-0.119042	0.000890648	0.0325668
Cs2g10620	-1.1024	4.73131	0.000897787	0.0327197
orange1.1t02795	-1.13881	3.3061	0.000907011	0.0328975
Cs5g08720	-2.7468	-0.540521	0.000907485	0.0328975
Cs2g29060	-1.4071	3.58287	0.000909503	0.0329124
Cs6g15050	-1.9351	0.637605	0.000920206	0.033241
orange1.1t04177	-1.85694	2.30211	0.000932184	0.0335554
Cs5g28520	-2.3599	0.764096	0.000941265	0.0338228
Cs2g01250	-5.29536	0.48278	0.000951838	0.0340236
Cs8g05910	1.67232	2.00279	0.000975851	0.0348159
Cs8g05800	-1.26453	2.46826	0.000980801	0.0348763
Cs2g16070	-1.78323	1.74629	0.000994652	0.0352784
Cs7g15810	-3.53044	-0.514521	0.000995552	0.0352784
Cs8g01960	1.51494	2.79678	0.00100307	0.0354835
Cs2g31400	5.61997	-1.3597	0.00101368	0.0357967
Cs1g23720	-1.27826	3.66295	0.0010219	0.0359848
Cs5g15870	-1.23331	3.04328	0.00104404	0.0365457
orange1.1t03822	-1.0546	3.70456	0.00104559	0.0365457
Cs3g27320	-1.04968	4.81829	0.00105085	0.0366422
Cs7g13250	-1.02082	5.15402	0.00105193	0.0366422
Cs3g09470	-3.66696	-0.808839	0.00105841	0.0367122
Cs2g01910	-1.1145	6.28378	0.00106357	0.0367122
orange1.1t04220	-1.98642	2.56968	0.00106549	0.0367122
Cs7g09050	-2.76004	-0.160754	0.00106649	0.0367122
orange1.1t02445	-1.74281	2.19767	0.00107035	0.0367834
Cs6g20220	-2.38001	1.19012	0.00109875	0.0376962
Cs7g11100	-2.85169	-0.268819	0.00112794	0.038633
Cs1g10460	-3.08356	-0.540851	0.00113662	0.0388651
Cs7g29910	1.42673	2.23085	0.00114926	0.0391844
Cs4g08780	-1.14366	2.69666	0.0011517	0.0391844
Cs6g20290	-3.65574	0.138571	0.00116875	0.039677
Cs2g06900	-1.06986	5.92652	0.00117299	0.039677
Cs3g24860	-1.36423	4.98278	0.00117343	0.039677
Cs9g18920	-4.07738	-1.0984	0.00117392	0.039677
orange1.1t01993	1.19603	10.839	0.00118994	0.039992
Cs3g07780	-2.24398	-0.00200802	0.00119105	0.039992
Cs4g17505	-2.60345	1.72968	0.00119818	0.0401654
Cs4g14150	-2.29514	-0.0790013	0.00120088	0.0401903
Cs5g08670	-1.26619	3.33773	0.00122431	0.0407746
Cs5g11770	-2.91447	0.499238	0.00124415	0.0411869
Cs5g01240	-6.0168	-1.09845	0.00124473	0.0411869
Cs5g18640	5.77041	-1.26621	0.00124715	0.0412003
orange1.1t04768	-2.02731	2.18349	0.00124988	0.041224
Cs3g15090	1.0017	3.43653	0.00125682	0.0412759
Cs5g22800	-1.17495	3.41987	0.0012575	0.0412759
Cs2g21820	-3.08903	0.389361	0.00127465	0.0417718
Cs5g24590	-1.21523	3.58287	0.00127689	0.0417783
orange1.1t05133	-1.8511	2.55474	0.00127955	0.0417985
Cs2g31090	-1.8657	0.900828	0.0012904	0.0420858
Cs2g13860	-1.35542	3.27438	0.00129725	0.0421911
Cs2g01750	-1.46654	3.03014	0.00129774	0.0421911
Cs8g08760	-1.31631	2.64669	0.00131148	0.0425702
Cs2g29630	-1.14559	2.79689	0.00132023	0.0427862
Cs7g28970	-2.06287	1.74167	0.00133671	0.0432132
Cs8g13510	-2.29304	-0.202932	0.00134029	0.0432132
Cs3g23170	-5.75756	-1.26836	0.00134294	0.0432132
Cs3g25000	-1.27129	4.05649	0.00134703	0.0432132
Cs5g27320	-3.42933	0.172018	0.00136884	0.0437388
orange1.1t01764	-5.35144	-1.51323	0.00138081	0.0439571
Cs1g05120	-5.35108	-1.51331	0.00138094	0.0439571
Cs6g19280	1.94709	1.61157	0.00138211	0.0439571
Cs7g04380	2.38142	0.463013	0.00139801	0.0443938
orange1.1t03462	-4.19578	-1.0204	0.0014217	0.0449499
Cs1g17030	7.99362	0.475582	0.00142211	0.0449499
Cs7g24340	1.17397	3.79199	0.00142491	0.0449693
Cs1g25100	-4.01415	-1.1388	0.00142755	0.0449832
Cs5g18330	-2.17666	1.03295	0.00143737	0.0451537
Cs3g19690	1.24775	2.58673	0.0014505	0.0453574
Cs3g24580	-1.13112	2.80455	0.00146458	0.0457281
Cs6g15110	3.31096	-1.05676	0.0014699	0.0458242
Cs4g10580	-1.30223	3.07598	0.00147287	0.0458469
Cs7g32200	-1.39773	2.50218	0.0014829	0.0460195
Cs7g13470	-1.98653	1.76924	0.00149676	0.0463791
orange1.1t00286	1.72985	1.0837	0.00153026	0.0472742
Cs8g05230	-1.92304	0.685068	0.00153531	0.0473587
Cs2g21210	-3.5685	-0.876046	0.00154905	0.0477106
Cs1g04700	-2.42425	-0.246603	0.00155813	0.0479184
Cs8g01260	-1.25228	4.08086	0.00157387	0.0481852
orange1.1t03644	-3.00346	-0.596276	0.00163064	0.0496824
Cs3g01480	-1.05408	4.19992	0.00163441	0.0496824
orange1.1t02850	-1.25986	2.41746	0.0016349	0.0496824

## Sheet: 210vs230 Brown
Gene_ID	logFC	logCPM	PValue	FDR
Cs6g07400	3.92195	8.40091	1.6384e-81	3.28369e-77
Cs7g01400	3.99353	8.08444	7.27931e-80	7.2946e-76
Cs3g26410	2.84458	6.25378	3.12141e-67	2.08531e-63
Cs4g09440	3.94053	6.72201	1.05872e-66	5.30473e-63
Cs5g01260	2.67963	7.36755	2.87781e-62	1.15354e-58
Cs9g17750	-3.13699	6.10642	1.74063e-61	5.81429e-58
Cs3g19760	2.73282	8.47656	1.37794e-59	3.94524e-56
Cs4g14230	2.82373	6.1017	1.80414e-57	4.51981e-54
Cs6g07670	2.51349	7.2087	4.54369e-57	1.01183e-53
Cs2g17030	2.6996	7.20077	2.86092e-56	5.73385e-53
Cs2g13920	3.9892	4.84382	7.51507e-54	1.36925e-50
Cs5g32110	3.83132	4.47783	4.63134e-53	7.73511e-50
Cs6g15290	3.03587	9.21149	3.72898e-52	5.74894e-49
Cs3g26210	3.0763	7.34247	7.25709e-52	1.0389e-48
Cs2g07700	3.17038	9.77939	2.1573e-51	2.88244e-48
Cs9g16640	2.52913	10.0543	2.63752e-51	3.30382e-48
Cs1g17210	3.34143	7.655	2.93786e-51	3.46356e-48
Cs4g05200	2.4738	6.92689	2.81451e-50	3.1338e-47
Cs8g14950	4.05358	9.24842	4.01166e-50	4.23166e-47
Cs8g17830	-2.74105	5.03064	5.23405e-49	5.24504e-46
Cs3g06440	2.46454	8.39699	7.12271e-49	6.79778e-46
Cs1g17220	3.32165	8.52362	1.1372e-48	1.03599e-45
Cs4g06290	2.64401	6.47133	3.17413e-46	2.76591e-43
Cs2g06950	2.78954	5.15068	2.04441e-44	1.70726e-41
Cs1g22200	-2.66474	6.29454	6.74534e-44	5.4076e-41
Cs3g17230	2.59396	5.80194	1.87246e-43	1.44338e-40
Cs6g16980	2.59564	8.51767	2.12652e-43	1.57851e-40
Cs7g02820	2.43044	7.98253	2.82385e-43	2.02127e-40
Cs2g16770	2.62143	5.59686	2.97513e-43	2.05612e-40
Cs4g12760	2.92419	5.9055	5.61816e-43	3.7533e-40
Cs3g24230	2.50356	9.39629	9.59428e-43	6.20285e-40
Cs8g05970	2.66215	8.59309	4.80696e-42	3.01066e-39
Cs2g13700	3.68399	5.40947	7.70507e-42	4.67955e-39
Cs3g18330	2.83354	6.62028	2.94825e-40	1.7379e-37
Cs3g27810	3.29887	6.04745	3.05209e-40	1.74771e-37
Cs8g17160	2.32767	8.36825	5.98913e-40	3.33428e-37
Cs5g11310	2.49879	6.24037	1.7357e-39	9.40188e-37
Cs8g16910	2.20316	6.5626	2.36453e-39	1.2471e-36
Cs3g10250	2.28435	8.79233	1.392e-38	7.15347e-36
Cs1g13530	2.16419	9.78198	4.23414e-38	2.12152e-35
Cs2g07100	3.16735	6.3076	2.341e-36	1.14435e-33
Cs9g01760	2.07339	7.1085	1.06855e-35	5.09902e-33
Cs5g05470	1.99061	6.64704	1.66714e-35	7.77042e-33
Cs6g15880	2.06257	7.03166	2.26573e-35	1.03204e-32
Cs1g23640	2.14701	7.49006	9.92864e-35	4.42199e-32
Cs5g02940	2.2767	6.92112	3.95929e-34	1.72505e-31
Cs5g17920	2.5865	6.92755	5.11605e-34	2.18162e-31
Cs2g23750	2.40311	8.66559	7.36355e-34	3.07459e-31
Cs7g17060	2.05959	7.41081	1.25692e-33	5.14105e-31
Cs6g16900	-3.30671	5.46795	1.39e-33	5.57166e-31
Cs5g30230	-2.31588	7.27528	1.97729e-33	7.77036e-31
Cs1g25120	-2.22783	8.27451	3.23711e-33	1.24766e-30
Cs1g20270	3.12606	8.1704	1.04306e-32	3.94433e-30
Cs5g17900	2.554	5.72349	1.25727e-32	4.66632e-30
Cs2g27100	-3.58976	3.57695	1.29988e-32	4.73676e-30
Cs1g20420	-2.31489	6.41072	1.35265e-32	4.84103e-30
Cs5g29860	2.17592	8.91382	3.60487e-32	1.26752e-29
Cs2g19970	2.44927	5.02964	2.0734e-31	7.16466e-29
Cs8g16290	2.36495	8.50697	4.37639e-31	1.48664e-28
Cs4g20430	1.7372	8.26842	5.5399e-31	1.85051e-28
Cs7g13310	-1.68179	7.70873	7.96066e-31	2.61553e-28
Cs5g10180	2.30993	7.90924	8.78694e-31	2.84045e-28
Cs2g07720	3.62875	8.01459	9.40452e-31	2.99183e-28
Cs3g02020	2.95715	4.33819	1.36535e-30	4.27567e-28
Cs4g03740	3.27917	5.06722	2.43356e-30	7.50361e-28
Cs4g01430	2.13984	7.20413	6.40363e-30	1.94457e-27
Cs7g07640	2.43165	8.24287	7.72851e-30	2.31186e-27
Cs2g13440	1.92719	5.30794	1.42159e-29	4.18992e-27
Cs2g18250	2.27352	7.44987	1.46519e-29	4.25586e-27
Cs6g21840	3.48017	3.76446	2.17372e-29	6.22368e-27
Cs8g02170	2.32486	5.66764	3.23415e-29	9.12942e-27
Cs6g07420	1.90093	8.21013	5.49847e-29	1.53056e-26
Cs9g09740	2.34323	5.1236	6.41969e-29	1.76251e-26
Cs5g25690	-3.91474	3.36392	7.83707e-29	2.12258e-26
Cs7g28380	1.87673	6.80948	9.39158e-29	2.50968e-26
Cs8g02780	-1.79356	6.5157	1.02346e-28	2.69897e-26
Cs6g08550	2.19499	4.58575	1.07048e-28	2.7863e-26
Cs4g04030	-1.66795	7.79068	1.17248e-28	3.01268e-26
Cs8g14280	1.80829	6.80972	1.63125e-28	4.13843e-26
Cs2g05560	-2.93608	5.36298	2.17175e-28	5.41051e-26
Cs2g04370	-2.04333	5.62468	2.18666e-28	5.41051e-26
Cs6g06570	-1.87018	5.59008	4.46982e-28	1.09249e-25
Cs2g15520	2.48871	9.8217	5.00166e-28	1.20775e-25
Cs7g02540	2.0395	5.43252	9.62364e-28	2.29616e-25
Cs2g27050	1.6897	8.18818	1.16523e-27	2.74749e-25
Cs6g10660	3.84283	3.46643	1.64385e-27	3.83093e-25
Cs1g15970	2.5351	7.10795	2.86834e-27	6.59376e-25
Cs2g09840	2.07772	6.14332	2.89517e-27	6.59376e-25
Cs1g26190	-1.82238	8.0821	3.65277e-27	8.2257e-25
Cs2g03240	2.22499	5.96691	3.70689e-27	8.25483e-25
Cs2g07660	-3.5848	4.25816	3.93462e-27	8.66568e-25
Cs7g09440	2.93625	4.81551	6.72954e-27	1.46601e-24
Cs2g17100	-2.70042	3.70614	8.84095e-27	1.90527e-24
Cs8g01940	-2.09488	4.9728	1.17774e-26	2.49792e-24
Cs3g14420	1.99578	8.18099	1.18403e-26	2.49792e-24
Cs5g12300	-3.51567	3.68407	1.46535e-26	3.05923e-24
Cs3g18490	-2.1593	4.87627	1.75121e-26	3.61832e-24
Cs7g25850	1.7241	7.15208	3.53652e-26	7.23254e-24
Cs3g25370	1.80764	8.13656	4.87301e-26	9.86514e-24
Cs1g26810	2.06142	8.42133	5.62254e-26	1.12687e-23
Cs2g02790	1.5695	8.12734	1.05678e-25	2.09703e-23
Cs7g25640	-2.34141	4.50273	1.27481e-25	2.50488e-23
Cs1g03220	-1.79981	5.92418	1.6335e-25	3.17851e-23
Cs1g21740	2.28045	6.37032	1.94512e-25	3.74848e-23
Cs9g17050	2.3728	4.92034	1.99729e-25	3.79349e-23
Cs7g22730	2.69785	9.52507	2.00633e-25	3.79349e-23
Cs1g26700	1.82716	8.75559	2.08693e-25	3.90899e-23
Cs1g20150	2.54417	7.28415	2.27928e-25	4.22975e-23
Cs2g05450	3.82935	3.19161	2.84575e-25	5.23252e-23
orange1.1t01334	-1.71119	5.51705	3.81629e-25	6.95329e-23
Cs1g14300	3.57111	3.19332	6.22288e-25	1.12359e-22
Cs1g17860	2.49324	6.15275	1.58611e-24	2.81702e-22
orange1.1t01124	2.40348	4.34731	1.58828e-24	2.81702e-22
Cs9g17990	1.81596	10.2294	2.11156e-24	3.71227e-22
Cs8g04490	1.70635	6.49681	2.47783e-24	4.31832e-22
Cs3g14440	-1.83788	8.12808	2.72844e-24	4.71409e-22
Cs9g14150	1.82385	6.91839	3.42237e-24	5.86249e-22
Cs9g18660	1.61446	8.10508	4.79103e-24	8.13745e-22
Cs4g12130	2.07888	7.36758	7.69391e-24	1.29581e-21
Cs1g13880	2.3383	5.14328	1.15393e-23	1.92726e-21
Cs3g21660	3.12997	5.69842	2.66351e-23	4.41175e-21
Cs6g06530	-1.81398	6.97151	3.32013e-23	5.45427e-21
Cs7g15610	1.9845	5.71785	3.41273e-23	5.56082e-21
Cs6g18360	5.12634	3.46713	3.96357e-23	6.40627e-21
Cs6g15130	1.95098	5.83807	4.33443e-23	6.94965e-21
Cs2g21000	1.98429	9.36746	5.53689e-23	8.80717e-21
Cs7g04700	2.28926	4.46547	6.11819e-23	9.65518e-21
Cs2g19930	1.54053	7.62499	8.05693e-23	1.26154e-20
Cs8g18530	1.59315	6.27437	8.63136e-23	1.34101e-20
Cs8g12370	2.21888	5.20962	1.63865e-22	2.5263e-20
Cs6g21210	1.44064	8.00562	1.74287e-22	2.66646e-20
Cs8g16360	-1.51366	6.82804	1.79054e-22	2.71864e-20
Cs5g32300	2.53051	4.2104	1.87164e-22	2.82041e-20
Cs6g17190	-3.03572	3.18692	1.93731e-22	2.89757e-20
Cs2g21960	1.6763	6.47793	2.43383e-22	3.61324e-20
Cs3g09280	2.91969	4.82735	2.55385e-22	3.76355e-20
orange1.1t01969	1.75121	8.91792	2.75472e-22	4.02993e-20
Cs1g14130	-1.57615	5.55957	2.78481e-22	4.04443e-20
Cs1g09130	1.79807	4.83936	2.81538e-22	4.05941e-20
Cs6g18250	1.65075	7.90501	2.84404e-22	4.07057e-20
Cs4g02530	2.70526	3.72616	2.86373e-22	4.07057e-20
Cs1g16000	-3.00865	5.31438	5.22276e-22	7.37144e-20
Cs5g30850	2.05275	9.84847	5.92982e-22	8.31088e-20
Cs7g26410	-1.78496	8.46373	6.69551e-22	9.31885e-20
Cs7g02450	-7.36335	1.50164	7.22989e-22	9.9932e-20
Cs3g18280	2.13051	4.54522	1.14068e-21	1.56585e-19
Cs3g16440	1.86213	6.83291	1.1634e-21	1.58618e-19
Cs9g09450	2.37371	4.25696	1.21796e-21	1.64935e-19
Cs6g01310	1.68376	10.1323	1.29159e-21	1.73732e-19
Cs9g04120	3.63272	2.54034	1.46179e-21	1.95315e-19
Cs5g11450	1.52794	6.39874	1.58307e-21	2.10118e-19
Cs4g18270	1.66961	7.07723	1.62369e-21	2.14091e-19
Cs6g07370	2.11048	5.88902	1.80737e-21	2.36753e-19
Cs7g15480	-4.27347	4.28822	1.83484e-21	2.38791e-19
Cs2g05510	-3.09906	5.46742	2.27832e-21	2.94594e-19
Cs7g06330	1.80793	5.37505	2.29981e-21	2.95466e-19
Cs5g05050	-1.74033	6.90064	2.60753e-21	3.32867e-19
Cs4g17340	-2.34788	4.34275	3.30716e-21	4.19507e-19
Cs1g22770	1.56584	6.51633	4.10812e-21	5.1783e-19
Cs7g32340	1.66638	6.36152	6.22447e-21	7.79693e-19
Cs4g15280	1.93114	5.56927	6.48155e-21	8.06853e-19
Cs9g18850	-2.29198	3.93165	7.25446e-21	8.97493e-19
Cs7g26940	1.44438	5.97182	1.17696e-20	1.44715e-18
Cs7g03050	1.62079	7.12338	1.24416e-20	1.52045e-18
Cs1g12650	-1.62234	5.18392	1.27972e-20	1.55443e-18
Cs6g19580	-1.8356	5.77684	1.42889e-20	1.72517e-18
Cs5g09880	1.78983	9.20538	1.47625e-20	1.77168e-18
Cs5g28400	2.96313	5.86114	1.69085e-20	2.01715e-18
Cs5g25740	1.946	5.49813	1.85721e-20	2.19373e-18
Cs3g11290	2.69181	4.13715	1.86076e-20	2.19373e-18
Cs1g20120	2.08578	4.93654	2.0491e-20	2.40164e-18
Cs4g11440	1.95535	4.40916	2.20039e-20	2.56396e-18
Cs1g24700	-2.38811	3.8055	2.9244e-20	3.37308e-18
orange1.1t05522	-1.88555	6.04265	2.92843e-20	3.37308e-18
Cs5g28990	1.801	8.26861	3.45287e-20	3.95443e-18
Cs7g03630	-1.75937	7.31032	3.73758e-20	4.25617e-18
Cs7g11130	1.80873	5.00609	7.39854e-20	8.37749e-18
Cs2g30320	1.68883	8.38162	7.65629e-20	8.62063e-18
Cs8g17360	1.95921	7.14073	8.08867e-20	9.0566e-18
Cs7g02060	1.81755	5.28364	8.72181e-20	9.71125e-18
orange1.1t00436	1.68656	7.49301	8.98856e-20	9.95297e-18
Cs9g11850	1.35602	7.54242	1.23518e-19	1.36019e-17
Cs1g19280	1.47447	8.02665	1.26926e-19	1.39009e-17
Cs9g09180	1.50643	5.36067	1.37479e-19	1.49747e-17
Cs7g13290	5.40742	1.99133	1.53271e-19	1.66046e-17
Cs6g11950	2.60948	7.98705	1.64981e-19	1.77772e-17
Cs6g12050	1.61591	6.04148	1.81686e-19	1.94725e-17
Cs3g23310	1.32295	7.68877	2.05036e-19	2.18581e-17
Cs6g05580	-1.40875	5.38624	2.29058e-19	2.42898e-17
Cs5g04290	-1.91897	4.31309	2.32955e-19	2.45731e-17
orange1.1t04040	-2.11923	4.59185	2.56469e-19	2.69118e-17
orange1.1t03275	-5.38557	4.40396	2.89233e-19	3.01918e-17
Cs3g12230	1.95511	7.00797	3.24664e-19	3.37146e-17
Cs8g01960	3.16654	5.53339	3.59316e-19	3.71207e-17
Cs2g10980	-1.57863	5.70444	3.88341e-19	3.98481e-17
Cs4g02730	1.50479	6.59897	3.89693e-19	3.98481e-17
Cs8g16540	-1.5914	6.74462	4.56744e-19	4.62889e-17
Cs7g15470	-1.73982	6.23459	4.573e-19	4.62889e-17
Cs2g19860	1.32715	5.87489	5.01768e-19	5.05348e-17
Cs3g16570	1.6965	7.42973	5.26394e-19	5.275e-17
Cs3g18070	3.23303	6.62715	6.80172e-19	6.78209e-17
Cs7g32220	1.93335	10.858	6.91661e-19	6.86251e-17
Cs1g24060	-1.79452	7.16816	7.32364e-19	7.23057e-17
Cs7g02900	1.34162	6.2095	7.93376e-19	7.79453e-17
Cs2g28030	-1.74618	7.18592	8.09054e-19	7.90979e-17
Cs4g05490	1.76146	9.92213	8.62821e-19	8.39449e-17
Cs1g03960	3.04493	3.5215	9.12558e-19	8.8355e-17
Cs6g11080	-1.5563	5.6003	9.66429e-19	9.3121e-17
Cs8g05460	-2.95014	3.30703	1.02748e-18	9.85296e-17
Cs9g14590	2.82518	4.05653	1.0388e-18	9.91407e-17
Cs3g25140	4.29724	4.21263	1.06358e-18	1.01025e-16
Cs4g15880	1.85837	7.17559	1.35681e-18	1.28269e-16
Cs7g32520	1.60446	5.69437	1.39766e-18	1.31511e-16
Cs9g01410	1.61247	9.31991	1.66912e-18	1.5632e-16
Cs4g15510	1.8619	6.72339	1.72293e-18	1.60609e-16
Cs5g27290	-2.88522	3.03958	1.78683e-18	1.65795e-16
Cs6g08950	1.5723	7.32308	1.82467e-18	1.68525e-16
Cs8g18120	-1.47463	7.19779	1.86919e-18	1.71845e-16
Cs7g04150	1.93479	5.81504	1.93394e-18	1.76987e-16
Cs9g08480	-2.16154	3.54038	2.02559e-18	1.84531e-16
Cs2g30300	1.45798	5.84094	2.31848e-18	2.10258e-16
orange1.1t00502	-1.39679	6.00314	2.34888e-18	2.12055e-16
Cs2g05280	1.40234	7.26696	2.58456e-18	2.32286e-16
Cs9g18910	2.17937	3.61834	2.72926e-18	2.44196e-16
Cs1g21970	-1.58514	4.88004	2.86666e-18	2.55349e-16
Cs3g14770	1.42328	7.56243	2.98102e-18	2.64361e-16
Cs7g04100	1.39091	6.45924	3.25225e-18	2.87144e-16
Cs7g31010	1.42623	7.24626	3.70009e-18	3.2525e-16
Cs3g22990	-1.5298	5.82907	4.72021e-18	4.13111e-16
Cs4g04300	1.23178	9.32562	5.25568e-18	4.57976e-16
Cs5g11560	2.59944	4.37866	5.87445e-18	5.09678e-16
Cs4g05930	-1.56573	5.47963	6.44542e-18	5.56806e-16
orange1.1t01745	1.23415	7.36645	6.94282e-18	5.97201e-16
Cs6g05990	2.30249	5.45947	7.28164e-18	6.2367e-16
Cs1g18720	1.24514	7.40197	7.40167e-18	6.31252e-16
Cs2g10580	1.22013	8.53285	8.2484e-18	7.00485e-16
Cs3g09120	-2.15457	5.94046	8.69848e-18	7.3559e-16
Cs1g07030	-2.61072	3.17155	9.71619e-18	8.18201e-16
Cs2g04260	1.31319	6.89879	1.03041e-17	8.6134e-16
Cs6g19180	2.33342	4.93283	1.03144e-17	8.6134e-16
Cs7g04050	1.25077	7.34008	1.18467e-17	9.85191e-16
Cs6g19380	2.66832	6.61024	1.19898e-17	9.92975e-16
orange1.1t02388	-1.26014	7.39217	1.24456e-17	1.02648e-15
Cs7g06620	1.358	7.20481	1.4696e-17	1.20712e-15
Cs8g01240	1.53478	8.40856	1.50158e-17	1.22835e-15
Cs1g17380	2.0874	8.89644	1.73865e-17	1.41651e-15
Cs5g17880	1.5105	5.55404	1.95664e-17	1.58765e-15
Cs4g09200	-2.26046	4.84824	2.08191e-17	1.68248e-15
Cs4g01630	1.97538	7.11046	2.14209e-17	1.72417e-15
Cs3g25420	1.36804	10.6329	2.16833e-17	1.73831e-15
Cs4g05380	-1.48449	8.35065	2.17917e-17	1.74004e-15
Cs9g07830	-1.98152	6.47523	2.58788e-17	2.05818e-15
Cs2g04490	1.44678	6.19624	2.67817e-17	2.12158e-15
Cs7g09620	-1.30337	5.93776	2.99724e-17	2.36499e-15
Cs4g16650	1.39836	6.87581	3.01394e-17	2.36884e-15
Cs5g34480	1.3497	5.96155	3.0871e-17	2.41686e-15
Cs7g12540	1.87313	7.24726	3.21251e-17	2.50525e-15
Cs7g29300	-2.0045	4.41386	3.22913e-17	2.50846e-15
Cs5g28140	1.38098	6.73936	3.63142e-17	2.81007e-15
Cs9g17960	1.20493	7.26443	3.65128e-17	2.81458e-15
Cs4g17630	1.61637	7.75604	3.77863e-17	2.90158e-15
Cs3g15780	1.59141	5.82576	4.03554e-17	3.08703e-15
Cs2g03110	-2.27858	7.08165	4.13026e-17	3.14748e-15
Cs1g20460	-5.09069	1.2417	4.20777e-17	3.1944e-15
Cs1g14920	2.14126	4.52183	4.92705e-17	3.72634e-15
Cs5g02520	1.67226	4.57119	4.96341e-17	3.73973e-15
Cs8g19230	2.57608	3.8758	5.40989e-17	4.06086e-15
Cs8g08820	-3.06343	3.62914	6.89958e-17	5.15975e-15
orange1.1t02784	-1.28117	6.59152	7.5742e-17	5.6432e-15
Cs4g13020	-1.88039	4.9836	7.97598e-17	5.92054e-15
Cs7g12860	-2.21616	3.87626	8.02557e-17	5.93537e-15
Cs6g07040	-1.7136	4.54754	8.38091e-17	6.17537e-15
Cs1g25480	-2.79466	3.04568	8.74029e-17	6.41659e-15
Cs3g13860	-1.56315	5.16679	9.49059e-17	6.93899e-15
Cs6g08600	1.32742	10.5997	9.52111e-17	6.93899e-15
Cs8g15910	1.21478	9.29922	1.01604e-16	7.37804e-15
Cs2g30380	1.38043	8.12975	1.03196e-16	7.45739e-15
Cs2g30930	1.39006	5.30774	1.03441e-16	7.45739e-15
Cs2g10570	1.81469	7.65465	1.0514e-16	7.55271e-15
Cs6g16930	1.85671	4.15041	1.10559e-16	7.91369e-15
Cs6g16650	2.18462	7.56953	1.13849e-16	8.12016e-15
Cs8g01190	1.46558	5.09241	1.16123e-16	8.25299e-15
Cs5g02440	2.62117	6.94947	1.27715e-16	9.04475e-15
Cs9g07670	3.20105	9.5781	1.37661e-16	9.68564e-15
orange1.1t01622	1.48293	8.67537	1.37731e-16	9.68564e-15
Cs6g10560	1.25423	8.00332	1.52814e-16	1.07088e-14
Cs7g30280	1.86406	4.85788	1.64994e-16	1.1522e-14
Cs9g16600	-2.02501	4.34663	1.76194e-16	1.22614e-14
Cs2g09020	1.18064	7.60293	1.92003e-16	1.32816e-14
Cs6g11940	1.75572	9.38385	1.9218e-16	1.32816e-14
Cs8g11330	1.53524	8.98836	2.12229e-16	1.46168e-14
Cs8g20570	-2.07605	4.24512	2.16851e-16	1.4884e-14
Cs8g16750	1.20134	8.15784	2.31249e-16	1.58181e-14
Cs5g10550	1.44506	10.1882	2.33569e-16	1.59224e-14
Cs2g10080	1.76535	9.90738	2.42167e-16	1.64526e-14
Cs2g07600	1.5116	5.44914	2.50094e-16	1.69337e-14
Cs6g15150	2.17263	4.47222	2.54618e-16	1.7182e-14
Cs7g13500	1.70594	5.89022	3.06028e-16	2.0582e-14
Cs2g14930	-1.70854	4.5116	3.1467e-16	2.10924e-14
Cs3g26240	1.48219	5.5942	3.23857e-16	2.16358e-14
Cs8g08270	-2.66477	4.04726	3.41932e-16	2.27675e-14
Cs9g17800	-3.18158	2.7006	3.43792e-16	2.28155e-14
Cs5g13290	2.76072	2.5264	3.47713e-16	2.29995e-14
Cs3g24180	-2.04449	4.03773	3.749e-16	2.47163e-14
Cs9g17340	1.55058	7.95318	3.78054e-16	2.48425e-14
Cs4g18480	-2.89248	2.87999	3.80992e-16	2.49537e-14
orange1.1t02241	1.3194	10.0313	3.88014e-16	2.53308e-14
Cs8g17450	1.39431	7.80458	3.92451e-16	2.55374e-14
Cs9g08000	1.62067	7.31146	3.9671e-16	2.57309e-14
Cs3g27850	1.33252	6.66376	4.0063e-16	2.58725e-14
Cs6g08610	3.28743	3.14123	4.01474e-16	2.58725e-14
Cs7g32300	1.1887	7.80267	4.15905e-16	2.67089e-14
Cs7g22250	1.36088	7.90501	4.17118e-16	2.67089e-14
Cs8g16640	-1.37308	7.21473	4.42043e-16	2.82148e-14
Cs3g01820	1.22247	6.521	4.44979e-16	2.8312e-14
orange1.1t02337	1.19634	7.30991	4.61867e-16	2.92935e-14
Cs7g16020	1.52961	5.93819	4.94635e-16	3.12728e-14
Cs1g17920	1.43037	5.51222	4.99415e-16	3.14757e-14
Cs1g16590	-2.35142	3.34256	5.04601e-16	3.17029e-14
orange1.1t00571	1.546	5.07131	6.44998e-16	4.0397e-14
Cs1g08280	1.58358	6.4994	6.53414e-16	4.07966e-14
Cs3g18410	1.31576	5.45195	6.58573e-16	4.0991e-14
Cs6g07510	2.50106	4.30107	7.01883e-16	4.35506e-14
Cs6g05830	-1.20998	6.32539	7.04041e-16	4.35506e-14
Cs1g04650	4.05788	2.40417	8.08752e-16	4.98739e-14
Cs4g03900	1.25707	6.64401	8.11808e-16	4.99087e-14
orange1.1t01769	1.50886	7.55951	8.32893e-16	5.10485e-14
Cs3g22600	2.60205	4.13176	8.63087e-16	5.27377e-14
Cs3g22270	1.30772	6.36355	8.97358e-16	5.46652e-14
Cs2g14240	1.75997	4.66222	9.287e-16	5.64031e-14
Cs7g27200	-2.24652	3.82009	1.01262e-15	6.13139e-14
Cs5g08520	1.25914	9.33062	1.08647e-15	6.55872e-14
Cs5g06360	-1.93413	4.14117	1.09102e-15	6.56641e-14
orange1.1t01626	1.42889	6.51913	1.46728e-15	8.80455e-14
Cs6g13710	-1.32308	5.53222	1.48256e-15	8.86969e-14
Cs6g05140	-3.38766	6.70009	1.50614e-15	8.95733e-14
Cs5g24500	1.2006	7.94621	1.50615e-15	8.95733e-14
Cs2g05170	2.36324	4.92658	1.56407e-15	9.24883e-14
Cs7g05460	3.04252	5.70863	1.56439e-15	9.24883e-14
Cs8g12640	1.47535	8.92977	1.57613e-15	9.29084e-14
Cs5g05300	2.45515	4.00066	1.62265e-15	9.53702e-14
Cs4g04210	1.71455	4.75613	1.67163e-15	9.79613e-14
Cs4g16180	1.77108	5.4017	1.82215e-15	1.06471e-13
Cs2g12850	1.53211	5.28111	1.88679e-15	1.09927e-13
Cs4g06820	1.15896	8.1936	1.94778e-15	1.13152e-13
orange1.1t02547	-1.46867	5.85157	2.16423e-15	1.25363e-13
Cs1g26610	1.14167	7.95204	2.22454e-15	1.28485e-13
Cs7g25680	1.60778	7.28574	2.44228e-15	1.40656e-13
Cs1g01910	-1.96199	4.43949	2.70719e-15	1.55466e-13
Cs7g18460	-1.67214	5.19932	2.87779e-15	1.64791e-13
Cs4g13600	1.71403	5.17969	2.90974e-15	1.66146e-13
orange1.1t02606	-1.63816	4.04665	3.36679e-15	1.91344e-13
Cs3g18240	-1.2969	5.33269	3.37014e-15	1.91344e-13
Cs8g03560	2.39756	5.20764	3.49024e-15	1.97603e-13
Cs2g10630	-1.5937	5.60046	3.84973e-15	2.17342e-13
orange1.1t04139	1.51606	9.44489	3.94185e-15	2.21917e-13
Cs3g19060	2.88198	8.72964	4.14329e-15	2.32318e-13
Cs2g07460	2.2195	6.11687	4.14978e-15	2.32318e-13
Cs7g11210	1.57585	6.70353	4.20303e-15	2.34644e-13
Cs5g28250	-1.4811	6.99318	4.31831e-15	2.4041e-13
Cs9g04890	1.28479	6.32236	4.44221e-15	2.46217e-13
Cs9g08460	3.70721	3.68177	4.44718e-15	2.46217e-13
Cs6g13890	2.29163	3.58819	4.46376e-15	2.46454e-13
Cs7g19800	1.20889	11.0351	4.63627e-15	2.55275e-13
Cs5g10220	1.29306	5.99029	4.7336e-15	2.5992e-13
orange1.1t01707	1.26452	5.41159	4.84639e-15	2.65386e-13
Cs4g01450	1.38073	9.52521	5.03128e-15	2.74605e-13
Cs5g14010	-1.52506	5.0814	5.04214e-15	2.74605e-13
Cs2g11750	1.4948	5.6954	5.43607e-15	2.95257e-13
orange1.1t02318	1.19555	7.87145	5.81021e-15	3.14725e-13
Cs1g13520	1.4989	7.88246	6.0675e-15	3.27776e-13
Cs9g01390	-2.00987	4.56351	6.50429e-15	3.50428e-13
Cs3g18160	1.24878	7.19516	6.77797e-15	3.64193e-13
orange1.1t00566	1.17156	10.4799	6.98453e-15	3.74289e-13
Cs2g06720	1.25763	5.76657	7.37533e-15	3.938e-13
Cs5g32100	1.44749	4.82815	7.38793e-15	3.938e-13
Cs2g04430	1.28666	6.11228	7.57963e-15	4.02947e-13
Cs2g16900	1.55555	7.65209	7.70128e-15	4.08331e-13
Cs2g29120	2.013	5.61319	7.92813e-15	4.19249e-13
orange1.1t02254	-1.18144	5.95276	8.34719e-15	4.40248e-13
Cs1g01600	1.32953	5.44796	9.15709e-15	4.81697e-13
orange1.1t01911	-1.54627	5.9584	9.53292e-15	4.99891e-13
Cs7g02010	1.88005	7.01082	9.55285e-15	4.99891e-13
Cs3g20040	-2.48898	6.11065	1.03312e-14	5.39214e-13
Cs5g07400	1.36636	7.2274	1.06466e-14	5.54231e-13
Cs3g03110	1.33703	6.05867	1.16326e-14	6.02585e-13
Cs7g15940	1.22118	6.7825	1.16356e-14	6.02585e-13
Cs6g07130	-1.85647	4.9811	1.17825e-14	6.08623e-13
Cs7g29660	1.62234	4.60764	1.1862e-14	6.11153e-13
Cs6g13590	1.62354	6.68486	1.24231e-14	6.38419e-13
Cs8g08600	2.29445	4.49726	1.2884e-14	6.60413e-13
Cs2g14860	1.36802	5.79361	1.30308e-14	6.66232e-13
Cs1g17390	1.40124	5.89153	1.30719e-14	6.66634e-13
Cs3g11280	1.81917	4.17853	1.31987e-14	6.71392e-13
Cs5g04340	1.19723	6.38999	1.47573e-14	7.48773e-13
Cs5g06590	2.00963	4.73912	1.53022e-14	7.74463e-13
Cs4g11450	1.33137	5.75166	1.58166e-14	7.98479e-13
Cs1g06300	1.24025	6.32823	1.6479e-14	8.2983e-13
orange1.1t02261	-1.10075	6.30448	1.73008e-14	8.6903e-13
Cs5g27920	1.37175	4.71791	1.81116e-14	9.0748e-13
Cs4g09670	-2.69861	5.2866	1.8597e-14	9.29481e-13
Cs6g05440	3.67652	1.66538	2.00794e-14	9.998e-13
Cs7g07200	-1.39045	5.53459	2.01037e-14	9.998e-13
Cs3g01630	1.13871	7.69766	2.20447e-14	1.09361e-12
Cs2g15710	-1.26726	6.56416	2.26345e-14	1.1201e-12
Cs2g05350	1.38347	8.2843	2.39478e-14	1.18217e-12
Cs1g08110	-2.47392	3.42173	2.4374e-14	1.20025e-12
Cs5g08010	1.16038	7.4446	2.49195e-14	1.22411e-12
Cs3g17300	-2.91842	2.92153	2.50826e-14	1.22911e-12
Cs3g09720	1.79948	5.36102	2.70508e-14	1.32232e-12
Cs8g20480	-1.57318	5.13235	2.8594e-14	1.39436e-12
orange1.1t02550	1.61593	4.53484	2.9041e-14	1.41272e-12
Cs6g19210	1.13038	8.62182	2.92893e-14	1.42135e-12
Cs1g21830	1.98236	4.0974	2.94255e-14	1.42451e-12
Cs2g06510	1.58355	8.19909	3.26183e-14	1.57527e-12
Cs8g04160	5.20292	1.59801	3.33735e-14	1.60787e-12
Cs3g12210	1.69774	5.88399	3.42747e-14	1.64409e-12
orange1.1t00466	1.11395	7.00588	3.42894e-14	1.64409e-12
Cs7g07140	1.29268	7.93441	3.51365e-14	1.68068e-12
Cs6g10670	1.19643	6.7637	3.72442e-14	1.77726e-12
Cs9g14140	2.57657	3.13114	3.75986e-14	1.78991e-12
Cs1g17480	1.08884	8.43202	3.85022e-14	1.82858e-12
Cs2g06320	1.10879	5.7532	4.1181e-14	1.95118e-12
Cs1g09030	1.13891	7.64462	4.38229e-14	2.07146e-12
Cs9g08750	1.35788	7.53352	4.53616e-14	2.13915e-12
Cs3g26420	1.13677	6.01383	4.69954e-14	2.21099e-12
Cs6g20490	1.43861	8.18817	4.82734e-14	2.26481e-12
Cs6g09510	1.26494	6.45621	4.83654e-14	2.26481e-12
Cs9g18610	1.35481	4.90356	5.14183e-14	2.3984e-12
Cs9g07160	-2.30702	3.35596	5.14576e-14	2.3984e-12
Cs2g13390	-1.32829	5.3447	5.32229e-14	2.47493e-12
Cs5g07230	3.87808	5.93403	5.95279e-14	2.76171e-12
Cs9g07970	-2.19224	4.28002	6.23553e-14	2.8862e-12
Cs1g21680	1.88743	4.09112	6.49082e-14	2.99744e-12
Cs5g07570	1.72144	4.41335	7.02778e-14	3.23795e-12
Cs9g06270	-1.35203	9.40885	7.97741e-14	3.66705e-12
Cs3g23380	1.43011	6.23155	8.19864e-14	3.76012e-12
Cs3g23850	1.30542	9.40525	9.22723e-14	4.2222e-12
orange1.1t02551	1.19618	7.91094	1.0043e-13	4.58502e-12
Cs7g13120	1.95835	3.8281	1.04747e-13	4.7712e-12
Cs5g01290	-1.91448	3.67299	1.05342e-13	4.78664e-12
Cs5g24040	-1.18928	7.04996	1.05563e-13	4.78664e-12
Cs4g10310	1.24521	5.19046	1.11453e-13	5.0423e-12
Cs3g24780	-1.62958	3.96194	1.12624e-13	5.08382e-12
orange1.1t00246	4.19637	1.58695	1.19963e-13	5.40291e-12
Cs2g12130	1.96947	7.77761	1.23572e-13	5.55299e-12
Cs2g07110	1.18406	6.05068	1.25267e-13	5.61655e-12
Cs6g09160	-1.54745	7.63125	1.26745e-13	5.67012e-12
Cs5g01510	1.20557	9.13937	1.29763e-13	5.79222e-12
Cs2g12590	1.25054	6.58027	1.40109e-13	6.24015e-12
orange1.1t00743	-1.15992	6.38864	1.42446e-13	6.33018e-12
Cs8g04040	1.16469	7.13301	1.5493e-13	6.86972e-12
Cs7g08920	-1.43812	4.86632	1.56983e-13	6.94536e-12
Cs4g17420	1.38626	5.0519	1.63888e-13	7.23488e-12
Cs2g14720	1.59477	4.32813	1.72535e-13	7.5999e-12
Cs7g28710	-1.41815	4.89901	1.73419e-13	7.62209e-12
Cs8g14120	1.79288	8.04312	1.74649e-13	7.65935e-12
Cs1g15730	1.27341	7.42048	1.8062e-13	7.90392e-12
Cs9g08050	1.25648	6.17446	1.84082e-13	8.03783e-12
Cs7g24030	1.13197	7.57833	1.9153e-13	8.3449e-12
Cs4g18740	1.6428	8.16476	1.92785e-13	8.38134e-12
Cs2g17480	-1.47222	5.54413	1.95615e-13	8.48596e-12
Cs3g18710	1.76762	4.05897	1.97118e-13	8.53269e-12
Cs4g08560	-2.37166	3.29586	2.03229e-13	8.77825e-12
orange1.1t04886	1.04052	6.74143	2.17073e-13	9.35609e-12
Cs7g08400	1.35031	6.85608	2.26709e-13	9.74947e-12
Cs5g23640	-1.53139	4.63939	2.27173e-13	9.74947e-12
Cs3g23050	2.97666	3.69252	2.31786e-13	9.92619e-12
Cs7g31740	-1.22664	6.30523	2.38869e-13	1.02077e-11
Cs6g18380	1.88095	5.62147	2.53794e-13	1.08224e-11
Cs8g02290	-1.66568	4.08496	2.59548e-13	1.10443e-11
Cs1g20470	1.13847	8.60283	2.69162e-13	1.14291e-11
Cs1g19300	1.33562	5.86116	2.88728e-13	1.22229e-11
Cs2g09400	1.14532	6.28599	2.89076e-13	1.22229e-11
Cs3g27390	-1.33899	5.94179	3.20621e-13	1.35282e-11
Cs4g04260	-1.18534	5.29536	3.21588e-13	1.35405e-11
Cs2g06650	1.58879	9.35019	3.30985e-13	1.39069e-11
orange1.1t00211	1.85799	4.40634	3.57868e-13	1.5005e-11
orange1.1t02832	-1.53319	4.71877	3.60765e-13	1.50949e-11
Cs9g05630	2.57171	3.20717	3.63018e-13	1.51575e-11
orange1.1t01089	1.06776	6.07552	3.94717e-13	1.64468e-11
Cs5g15510	1.41154	7.30835	4.57952e-13	1.90421e-11
Cs7g02730	1.09593	6.29982	4.74089e-13	1.96722e-11
Cs3g25170	1.16889	6.17756	4.75309e-13	1.96821e-11
Cs8g02450	-1.29793	5.2352	4.87271e-13	2.01358e-11
Cs7g04580	1.19766	7.59839	4.93679e-13	2.03587e-11
Cs1g12410	1.23379	6.86473	5.20489e-13	2.14202e-11
Cs2g11590	1.1569	6.79024	5.33437e-13	2.19081e-11
Cs7g31930	1.15066	6.24486	5.83769e-13	2.39262e-11
Cs6g18330	-2.24927	6.09306	5.96152e-13	2.43838e-11
Cs7g19290	1.15846	8.66857	6.1841e-13	2.52427e-11
Cs1g16440	-1.44539	4.88291	6.23775e-13	2.541e-11
Cs2g28610	-2.29123	4.55155	6.64887e-13	2.70298e-11
Cs6g16280	1.27811	6.28836	6.85389e-13	2.78068e-11
Cs1g04870	1.64009	9.45876	7.27725e-13	2.94648e-11
Cs8g20170	1.93449	3.58477	7.37363e-13	2.97948e-11
Cs1g22430	-1.78696	7.03873	7.54531e-13	3.04272e-11
Cs4g06430	-1.50237	4.70807	7.62294e-13	3.06785e-11
Cs5g29510	1.31707	4.97387	7.85273e-13	3.154e-11
Cs5g01300	1.0281	7.17367	7.95869e-13	3.19016e-11
Cs9g10160	-1.189	5.87374	8.09916e-13	3.23999e-11
Cs2g17160	3.02927	2.75816	8.1283e-13	3.24517e-11
Cs8g16600	-1.07072	6.66536	8.22462e-13	3.27709e-11
Cs1g05780	-1.15863	5.42845	8.38152e-13	3.33299e-11
Cs3g05470	-2.23812	3.01569	8.47881e-13	3.365e-11
Cs4g15710	-1.62486	5.74941	8.66329e-13	3.43141e-11
Cs5g02340	1.14871	9.05133	8.96165e-13	3.54259e-11
Cs8g12840	-1.24097	5.35873	9.32191e-13	3.67775e-11
Cs4g14090	1.14791	7.69115	9.55105e-13	3.76075e-11
Cs4g19660	-1.85531	3.63313	9.80354e-13	3.8526e-11
orange1.1t00312	5.9304	0.926397	9.89349e-13	3.88034e-11
Cs5g24610	4.15681	2.3741	1.06127e-12	4.14755e-11
Cs3g23680	1.32201	5.23672	1.06162e-12	4.14755e-11
Cs5g10430	1.16845	5.79715	1.09959e-12	4.28753e-11
Cs1g21880	-1.5729	4.61293	1.13286e-12	4.40869e-11
Cs9g07680	1.76125	9.67121	1.1643e-12	4.52226e-11
Cs1g26530	-1.59867	5.73007	1.16962e-12	4.53415e-11
Cs4g16020	-2.73922	2.80528	1.18483e-12	4.58423e-11
Cs1g01700	-1.13769	7.7673	1.27132e-12	4.90942e-11
Cs5g01720	-2.01161	3.47684	1.30762e-12	5.03986e-11
Cs5g03250	-1.1485	5.98287	1.31878e-12	5.07312e-11
Cs8g16680	-1.12665	6.95524	1.44004e-12	5.52897e-11
orange1.1t04045	1.41153	5.07392	1.49161e-12	5.71604e-11
Cs2g28000	1.71689	6.9987	1.52333e-12	5.82646e-11
Cs7g16760	1.44601	4.89566	1.5291e-12	5.83738e-11
Cs4g09520	1.05738	7.01969	1.54016e-12	5.86841e-11
Cs4g03750	-1.29391	5.49871	1.55971e-12	5.93162e-11
orange1.1t02389	2.22898	7.84406	1.59226e-12	6.04394e-11
Cs9g19220	-1.50876	5.03382	1.61831e-12	6.13123e-11
Cs8g13600	-8.11408	0.456913	1.65719e-12	6.26667e-11
Cs2g07170	2.49827	5.26563	1.72821e-12	6.52292e-11
Cs5g13010	1.49092	7.3807	1.82061e-12	6.85879e-11
orange1.1t00580	1.26085	8.11143	1.83944e-12	6.9167e-11
Cs3g24380	1.14045	6.03083	1.93264e-12	7.25357e-11
Cs2g29360	1.42675	4.78558	1.9447e-12	7.28516e-11
Cs1g26050	1.22958	7.24785	1.97515e-12	7.38543e-11
Cs7g28050	1.09884	8.75422	1.99029e-12	7.4282e-11
Cs3g15040	-1.4296	7.43447	2.01175e-12	7.49431e-11
Cs3g23070	1.81901	7.6681	2.24757e-12	8.35728e-11
Cs8g16030	1.37769	4.5551	2.42445e-12	8.99828e-11
Cs2g09450	1.39659	6.50263	2.49158e-12	9.23035e-11
Cs7g18840	1.10055	7.06443	2.58969e-12	9.5761e-11
Cs3g09800	-1.52021	5.90103	2.59835e-12	9.59043e-11
Cs1g04570	1.35292	7.01051	2.66665e-12	9.82445e-11
Cs7g10130	1.11905	5.51146	2.76136e-12	1.01547e-10
Cs1g23430	1.99519	4.32515	2.81623e-12	1.03375e-10
Cs1g22120	-1.14614	6.24798	2.824e-12	1.03471e-10
Cs7g19830	1.93259	6.11773	3.01819e-12	1.10017e-10
Cs8g14980	1.80451	5.50304	3.01853e-12	1.10017e-10
Cs3g19360	-1.81506	6.86718	3.01913e-12	1.10017e-10
Cs3g26850	-1.55089	8.2005	3.04606e-12	1.10797e-10
Cs2g06630	1.79446	3.99005	3.57362e-12	1.29751e-10
Cs5g27890	-1.29222	4.53846	3.62998e-12	1.31559e-10
Cs7g02050	2.64232	3.1308	3.65598e-12	1.32262e-10
Cs3g18760	1.88191	5.68949	3.7032e-12	1.33729e-10
Cs8g14900	1.07314	5.7679	3.77749e-12	1.36166e-10
Cs4g17120	1.22453	7.62852	3.78842e-12	1.36315e-10
orange1.1t04648	1.19237	7.37845	3.80596e-12	1.36701e-10
Cs5g28310	4.42128	1.25558	3.82311e-12	1.37071e-10
Cs1g24230	1.18361	6.6257	3.86662e-12	1.38384e-10
Cs5g03460	-1.66886	6.2208	3.90948e-12	1.39668e-10
Cs6g09960	1.41285	11.6389	3.93053e-12	1.4017e-10
Cs8g20020	1.06235	6.21518	4.0675e-12	1.44797e-10
orange1.1t03463	1.1139	6.20865	4.14978e-12	1.47464e-10
Cs7g30900	1.8343	4.41768	4.30459e-12	1.52695e-10
Cs5g01570	1.78785	3.97533	4.31593e-12	1.52827e-10
Cs3g16060	-3.19922	2.63565	4.32899e-12	1.53019e-10
Cs3g22260	-3.06175	1.6621	4.5316e-12	1.59899e-10
Cs1g22380	2.30153	3.5794	4.56027e-12	1.60627e-10
Cs7g28155	-1.538	4.15994	4.65703e-12	1.63649e-10
orange1.1t01648	-1.36498	5.795	4.66239e-12	1.63649e-10
Cs9g17020	1.03501	6.90135	5.00897e-12	1.75507e-10
Cs9g19180	1.22981	5.45329	5.08939e-12	1.78013e-10
Cs3g27160	1.0274	6.50828	5.10503e-12	1.78249e-10
Cs6g19205	1.14996	6.26559	5.17987e-12	1.80548e-10
Cs7g07120	-1.45399	4.54912	5.35274e-12	1.86249e-10
Cs4g02800	1.23243	8.49604	5.59381e-12	1.943e-10
Cs8g09780	1.15427	8.80841	5.64061e-12	1.95587e-10
Cs6g11690	-2.71481	4.74292	5.73296e-12	1.98446e-10
Cs2g28370	-1.04902	7.21062	5.81382e-12	2.00898e-10
Cs5g29350	1.1123	5.67018	6.25033e-12	2.15609e-10
Cs5g34230	2.85402	1.97106	6.32636e-12	2.17483e-10
Cs8g18260	-1.15987	9.10872	6.51046e-12	2.23429e-10
Cs2g27090	-4.42508	1.39372	6.71243e-12	2.29967e-10
Cs7g14940	2.11994	4.74405	6.79391e-12	2.32361e-10
Cs5g34820	-1.30237	4.73835	7.10006e-12	2.42006e-10
Cs6g07360	1.28695	7.72318	7.1217e-12	2.42331e-10
orange1.1t01192	1.3122	5.79764	7.19602e-12	2.44445e-10
Cs4g13640	-2.62199	2.96409	7.44515e-12	2.5248e-10
Cs3g18010	1.01177	6.59048	7.5631e-12	2.55615e-10
Cs3g21180	1.08438	5.50933	7.85559e-12	2.64505e-10
Cs4g06300	1.04411	5.94404	7.86573e-12	2.64505e-10
orange1.1t00247	-1.50092	4.00299	8.22486e-12	2.76118e-10
Cs2g07010	-1.17508	6.01721	8.24426e-12	2.76307e-10
Cs6g03270	-1.48081	4.03709	8.38541e-12	2.80568e-10
Cs2g05605	1.35245	4.53166	8.62639e-12	2.8815e-10
Cs4g06520	1.02661	8.56143	8.74063e-12	2.9148e-10
Cs4g10180	-1.02208	6.67821	9.07058e-12	3.01981e-10
Cs2g27870	1.01071	8.28317	9.21338e-12	3.06184e-10
Cs7g29780	-1.04586	7.32233	9.22737e-12	3.06184e-10
Cs2g07800	1.09925	5.61113	9.77826e-12	3.23927e-10
Cs4g07550	1.0051	6.45956	1.07881e-11	3.56791e-10
Cs3g17670	1.1738	6.0143	1.11178e-11	3.66484e-10
Cs7g07990	1.38637	5.50397	1.17677e-11	3.87271e-10
Cs6g02260	1.01889	6.78167	1.1826e-11	3.88551e-10
Cs8g20240	1.7674	3.8687	1.18929e-11	3.9011e-10
Cs7g10580	-1.47806	5.32264	1.20986e-11	3.96209e-10
Cs6g20230	-2.46505	3.12876	1.27604e-11	4.172e-10
Cs5g13540	1.88144	5.49114	1.31688e-11	4.29851e-10
Cs2g01740	-1.821	5.38861	1.403e-11	4.57218e-10
Cs2g18270	1.90299	3.51067	1.45382e-11	4.73012e-10
orange1.1t01772	-1.4219	4.34307	1.47956e-11	4.80607e-10
Cs8g10860	-1.88792	5.50983	1.50174e-11	4.87021e-10
Cs9g02040	1.22392	6.22278	1.5484e-11	5.01342e-10
Cs5g09230	-1.7347	3.96329	1.57965e-11	5.10633e-10
Cs3g20220	1.18736	4.83217	1.60599e-11	5.18315e-10
Cs2g16410	1.01185	7.11399	1.61834e-11	5.21459e-10
Cs6g13660	-1.03227	9.5164	1.71857e-11	5.51994e-10
Cs1g11350	1.025	7.77496	1.71861e-11	5.51994e-10
Cs5g11570	1.0221	6.42533	1.74159e-11	5.58413e-10
Cs2g28190	-1.0203	5.89759	1.74417e-11	5.58413e-10
Cs8g04150	1.15147	5.67328	1.75688e-11	5.61584e-10
Cs2g18560	-1.09172	5.77882	1.75995e-11	5.61672e-10
Cs8g19240	1.01575	6.3338	1.86025e-11	5.92657e-10
Cs8g10820	-1.0641	5.95176	1.86296e-11	5.92657e-10
Cs9g17630	1.02868	5.77298	1.89913e-11	6.03206e-10
Cs6g11510	-1.43678	5.33535	1.90685e-11	6.047e-10
Cs2g04390	-1.32382	4.73774	1.93915e-11	6.13303e-10
Cs2g12520	-1.45663	4.10776	1.9401e-11	6.13303e-10
Cs7g27900	1.1493	6.28161	1.97532e-11	6.23455e-10
orange1.1t00221	-1.25095	5.42308	2.01888e-11	6.36201e-10
Cs4g05340	1.12273	7.34906	2.04892e-11	6.44655e-10
Cs2g07390	1.11627	6.26614	2.11097e-11	6.63135e-10
Cs7g30250	1.33128	6.41985	2.19026e-11	6.86967e-10
Cs3g20570	1.71179	5.41977	2.2056e-11	6.90697e-10
Cs9g14120	1.07225	7.24114	2.29607e-11	7.1679e-10
Cs6g15560	-2.68643	4.66722	2.37209e-11	7.38946e-10
Cs3g06580	1.33116	4.86392	2.37442e-11	7.38946e-10
Cs8g12090	1.02687	8.25756	2.38828e-11	7.42108e-10
Cs3g15980	1.05054	6.32308	2.46731e-11	7.6467e-10
orange1.1t01884	-1.01718	7.60561	2.46852e-11	7.6467e-10
Cs4g08850	-2.70035	2.99914	2.52129e-11	7.78825e-10
Cs3g21470	-1.68336	4.09009	2.52199e-11	7.78825e-10
Cs1g20370	-1.40848	4.27363	2.56533e-11	7.9099e-10
Cs5g22710	-1.92887	4.21915	2.61557e-11	8.05243e-10
Cs9g10520	-1.40742	7.14934	2.71275e-11	8.33881e-10
Cs7g15050	2.58337	2.25582	2.83076e-11	8.67493e-10
Cs8g12450	1.31829	6.11047	2.90365e-11	8.88472e-10
Cs9g13610	-1.29797	4.8972	2.93752e-11	8.97467e-10
Cs3g07120	1.03275	7.12951	3.06583e-11	9.3524e-10
Cs2g17980	-1.4352	5.71262	3.26809e-11	9.95426e-10
Cs6g09710	-3.44919	2.27856	3.2872e-11	9.99728e-10
Cs8g14110	-1.44148	5.29914	3.31398e-11	1.00634e-09
Cs7g08390	1.30511	4.76613	3.33568e-11	1.0114e-09
Cs7g09330	-1.22461	5.51795	3.37102e-11	1.02057e-09
Cs3g07770	2.05148	5.64585	3.45687e-11	1.04341e-09
Cs1g07040	-2.09115	3.05754	3.52538e-11	1.06249e-09
Cs4g05430	1.08056	7.22531	3.5522e-11	1.06897e-09
Cs9g03660	1.24364	5.2609	3.80601e-11	1.14363e-09
Cs4g02910	1.212	6.82537	3.86781e-11	1.16046e-09
Cs1g01800	2.30187	5.00893	3.90487e-11	1.16983e-09
Cs5g29050	1.26123	6.03292	4.29035e-11	1.28339e-09
Cs9g01260	1.08417	6.0858	4.31358e-11	1.2865e-09
orange1.1t04729	-1.0661	5.51956	4.47254e-11	1.33193e-09
Cs6g13900	1.39617	4.38233	4.70374e-11	1.39663e-09
Cs5g08950	1.39218	4.60721	4.76855e-11	1.41378e-09
Cs7g31240	2.09858	3.9749	5.08588e-11	1.50563e-09
Cs2g20030	-1.30081	4.51175	5.0952e-11	1.50616e-09
Cs1g06440	-2.16677	2.94564	5.39218e-11	1.59161e-09
Cs5g28950	1.08007	8.75459	5.41266e-11	1.5953e-09
Cs3g16480	1.35986	4.75348	5.45363e-11	1.60266e-09
Cs5g12250	1.26603	8.33514	5.58603e-11	1.63917e-09
Cs7g09860	-1.01414	8.60325	5.61906e-11	1.64645e-09
Cs9g15430	1.49268	7.08712	5.68944e-11	1.66464e-09
Cs4g17200	1.24643	5.4768	5.8321e-11	1.70141e-09
Cs9g10630	1.20362	6.85054	6.02001e-11	1.75113e-09
Cs3g08530	-2.37181	2.36047	6.07337e-11	1.76409e-09
orange1.1t00261	-1.44821	4.57862	6.23621e-11	1.80877e-09
orange1.1t00535	1.0732	6.61058	6.25952e-11	1.81291e-09
Cs3g13770	1.08035	7.04461	6.53959e-11	1.89129e-09
Cs6g16110	-1.76079	3.47642	6.67026e-11	1.9263e-09
Cs2g06920	1.18585	5.82226	6.96492e-11	2.0085e-09
Cs2g01260	-1.91752	3.07361	7.26247e-11	2.0913e-09
Cs8g15150	1.28007	6.38216	8.01239e-11	2.29734e-09
Cs2g17890	1.27553	5.83728	8.05773e-11	2.30704e-09
Cs5g10670	-1.04125	6.53771	8.08745e-11	2.31225e-09
Cs1g24370	1.15138	6.56631	8.29404e-11	2.36457e-09
Cs5g08850	2.21269	3.31455	8.30778e-11	2.36512e-09
Cs3g21140	1.01428	6.26729	8.50489e-11	2.4178e-09
Cs6g05880	1.14857	4.98461	8.91122e-11	2.52973e-09
Cs2g16135	1.06872	6.00297	8.95022e-11	2.5372e-09
Cs5g03870	1.30305	6.37769	9.0601e-11	2.56446e-09
Cs7g29760	2.00778	5.12594	9.07195e-11	2.56446e-09
Cs7g31190	-2.33912	2.35364	9.16897e-11	2.58823e-09
Cs3g03420	1.19288	5.85388	9.72949e-11	2.74259e-09
orange1.1t01713	1.40252	5.29453	9.92659e-11	2.79422e-09
Cs7g06720	-4.11319	3.72417	9.95253e-11	2.7976e-09
Cs7g03800	1.80895	4.16643	9.99416e-11	2.80536e-09
orange1.1t04355	-1.20869	5.91323	1.02551e-10	2.87459e-09
Cs9g04820	2.37079	3.71175	1.02822e-10	2.87815e-09
Cs4g18310	-1.603	6.50526	1.08862e-10	3.04299e-09
Cs3g27880	-1.80382	3.69328	1.12618e-10	3.14357e-09
Cs9g19170	1.43586	6.85359	1.13013e-10	3.15022e-09
Cs8g20880	1.00485	5.99556	1.20674e-10	3.35909e-09
Cs2g29300	1.09093	6.22301	1.22022e-10	3.39191e-09
Cs3g11285	1.25021	4.86995	1.23515e-10	3.42866e-09
orange1.1t04714	1.09206	5.0624	1.25268e-10	3.47252e-09
Cs4g02170	-1.35194	4.20044	1.26474e-10	3.50108e-09
Cs5g14370	-2.10266	6.78783	1.28582e-10	3.55453e-09
Cs4g20410	-2.20973	3.54807	1.30345e-10	3.59337e-09
Cs4g04380	-1.88088	3.23608	1.34041e-10	3.68511e-09
Cs5g09840	-1.92192	3.42951	1.50558e-10	4.13353e-09
Cs3g15800	-1.47178	6.52664	1.51862e-10	4.16365e-09
orange1.1t02747	1.15058	5.77371	1.53008e-10	4.18932e-09
Cs1g24840	2.04087	3.82661	1.54769e-10	4.23176e-09
orange1.1t00270	-1.5122	3.61456	1.55724e-10	4.24645e-09
Cs7g06310	-1.28	5.85672	1.5573e-10	4.24645e-09
Cs8g05330	1.33212	5.72488	1.631e-10	4.44138e-09
Cs3g09670	-1.51995	4.11293	1.63778e-10	4.45378e-09
Cs6g09920	1.074	6.11426	1.64994e-10	4.4747e-09
orange1.1t01283	-1.20046	5.53536	1.69543e-10	4.59187e-09
Cs8g17800	-1.44669	4.75367	1.79778e-10	4.85594e-09
Cs6g10120	-3.19263	2.31671	1.85713e-10	5.0095e-09
Cs9g13790	1.28667	6.21907	1.94768e-10	5.23965e-09
Cs5g07880	-1.02403	5.30724	1.95352e-10	5.24832e-09
Cs3g26220	-2.63648	2.70048	1.96225e-10	5.26036e-09
orange1.1t04856	1.29649	4.82456	1.96325e-10	5.26036e-09
Cs5g07240	1.10964	4.99441	1.96844e-10	5.26721e-09
Cs4g18190	1.04424	6.63534	1.98596e-10	5.30703e-09
Cs9g05170	1.55897	3.60388	2.02112e-10	5.39379e-09
Cs5g27300	-1.63036	4.01079	2.03452e-10	5.41872e-09
Cs8g17030	2.37396	2.47817	2.03587e-10	5.41872e-09
Cs1g25850	-2.88953	3.11341	2.04108e-10	5.42536e-09
Cs6g21850	1.17206	10.1754	2.12555e-10	5.64241e-09
Cs3g26260	-1.00876	8.17152	2.14243e-10	5.67972e-09
Cs4g17620	1.13688	4.74892	2.17533e-10	5.7593e-09
Cs9g07230	2.26334	3.57347	2.19438e-10	5.80207e-09
Cs9g18360	-1.21489	4.48929	2.20934e-10	5.83394e-09
orange1.1t01181	1.14943	4.74095	2.21966e-10	5.85348e-09
Cs6g22020	-1.06211	5.4751	2.34964e-10	6.1881e-09
Cs3g05760	2.65052	2.40949	2.35939e-10	6.1975e-09
Cs3g15460	-1.15236	6.67893	2.37035e-10	6.21813e-09
Cs1g13320	1.42244	4.06387	2.39503e-10	6.27468e-09
orange1.1t02108	1.21407	6.15602	2.41971e-10	6.33104e-09
Cs7g29420	-2.78013	2.4802	2.4329e-10	6.35726e-09
Cs6g21320	2.61675	3.47342	2.45971e-10	6.41061e-09
Cs3g09020	-2.24965	2.155	2.52533e-10	6.57308e-09
Cs4g02810	1.46043	5.2558	2.57725e-10	6.69084e-09
Cs1g16670	-2.53536	2.43274	2.71398e-10	7.03668e-09
Cs4g15970	1.10063	5.80808	2.72943e-10	7.05039e-09
Cs7g14550	-1.54724	4.21863	2.72982e-10	7.05039e-09
Cs3g15390	-1.18791	7.22865	2.90326e-10	7.4887e-09
Cs3g01585	1.23525	9.06709	2.98453e-10	7.68843e-09
Cs1g05100	-1.01653	5.12679	3.11978e-10	8.02652e-09
Cs6g17360	-2.13665	3.07194	3.13559e-10	8.05685e-09
Cs6g15140	1.95304	3.3077	3.20971e-10	8.23676e-09
Cs3g10090	-3.65538	0.849864	3.28898e-10	8.42937e-09
Cs2g06050	-1.16221	5.43376	3.35848e-10	8.5965e-09
orange1.1t04132	1.32281	6.18609	3.53343e-10	9.03277e-09
Cs9g04690	1.61417	3.43376	3.57151e-10	9.09533e-09
orange1.1t00194	-1.33958	7.4733	3.77317e-10	9.58452e-09
Cs8g20900	1.86026	3.08338	3.86637e-10	9.80885e-09
Cs1g20230	-2.20953	3.14215	3.96553e-10	1.00477e-08
Cs7g09460	-1.39529	3.88547	3.9972e-10	1.01151e-08
Cs5g07690	1.14204	5.0537	4.12168e-10	1.0417e-08
Cs2g13180	2.59136	2.26259	4.13352e-10	1.04259e-08
Cs1g08485	-1.66015	3.345	4.13561e-10	1.04259e-08
Cs3g24630	1.50881	3.81375	4.29494e-10	1.0814e-08
Cs7g28170	-1.15605	6.26389	4.61486e-10	1.15904e-08
Cs4g06630	-2.15188	2.79212	4.62728e-10	1.1607e-08
orange1.1t04233	-1.78706	4.15281	4.6568e-10	1.16665e-08
Cs2g11250	1.41026	5.83635	4.67622e-10	1.17005e-08
Cs8g10260	-1.31242	4.48052	4.73401e-10	1.18303e-08
orange1.1t02851	-2.35194	2.80014	4.79489e-10	1.19675e-08
Cs3g21130	1.0926	5.83045	4.89737e-10	1.22081e-08
Cs6g20340	1.53579	5.27512	4.92592e-10	1.2264e-08
Cs2g08600	1.12394	5.83935	4.96371e-10	1.23428e-08
Cs8g01040	1.06606	5.04316	5.00173e-10	1.24219e-08
Cs7g15020	1.31444	6.31416	5.24411e-10	1.29917e-08
Cs2g15300	-1.12966	5.28572	5.38685e-10	1.33288e-08
Cs5g29870	-3.07634	1.33285	5.42103e-10	1.33968e-08
Cs4g09930	-1.60373	3.5763	5.48809e-10	1.35459e-08
Cs1g14500	-2.4209	2.82428	5.53754e-10	1.36511e-08
Cs2g02870	7.41678	-0.145256	5.70359e-10	1.40432e-08
Cs7g28910	-1.01448	5.95805	5.80257e-10	1.42693e-08
Cs1g02750	1.48529	6.68553	5.87514e-10	1.44301e-08
Cs5g16310	-2.56264	3.40113	5.91415e-10	1.45081e-08
Cs7g16860	-1.00052	5.13352	5.92906e-10	1.45269e-08
Cs3g22030	1.41239	4.6969	5.94336e-10	1.45442e-08
Cs4g05250	-2.35577	3.36406	5.9729e-10	1.45986e-08
Cs4g07130	1.12549	10.6225	6.01462e-10	1.46703e-08
Cs5g30640	1.06349	7.27089	6.0287e-10	1.46813e-08
Cs5g18230	1.2813	6.52558	6.06085e-10	1.47417e-08
orange1.1t04699	-1.45349	4.40193	6.11036e-10	1.48441e-08
Cs5g08030	3.03381	1.60457	6.25861e-10	1.51858e-08
Cs5g24440	-1.33921	4.19745	6.28803e-10	1.52388e-08
Cs4g18280	2.08967	4.73	6.39429e-10	1.54776e-08
Cs6g07920	-1.05145	8.30251	6.6505e-10	1.6059e-08
Cs7g32390	-1.49565	3.87639	6.74654e-10	1.62713e-08
Cs8g17890	2.15879	2.58198	7.1999e-10	1.73438e-08
Cs3g18060	2.4812	4.18788	7.29726e-10	1.75572e-08
Cs7g19490	1.01164	5.97049	7.32579e-10	1.75837e-08
Cs4g03660	-1.10161	4.67655	7.34672e-10	1.76128e-08
Cs6g03640	1.13481	5.74652	7.39752e-10	1.77134e-08
Cs1g18290	1.43389	4.14623	7.49164e-10	1.79174e-08
Cs1g04070	-1.14225	4.61346	7.63209e-10	1.82315e-08
Cs3g19430	-1.2467	4.8411	7.65807e-10	1.82501e-08
Cs5g04110	1.20194	7.30914	7.69153e-10	1.8308e-08
Cs3g18030	1.33674	10.3957	7.71574e-10	1.83439e-08
Cs3g12220	1.79674	3.69046	7.86714e-10	1.8661e-08
Cs7g19320	1.1433	8.92245	7.86774e-10	1.8661e-08
Cs8g12000	1.20643	5.80113	8.03509e-10	1.90354e-08
orange1.1t01791	1.05697	5.27273	8.20511e-10	1.94152e-08
Cs5g24430	-1.38795	5.32685	8.36855e-10	1.97553e-08
Cs3g10930	-1.47034	4.76045	8.6349e-10	2.03601e-08
Cs3g25410	1.47986	4.76534	8.92935e-10	2.10049e-08
Cs2g03340	4.54046	0.765239	8.98786e-10	2.11178e-08
Cs8g19570	-2.24046	5.78523	9.03749e-10	2.12095e-08
Cs2g09850	1.70499	6.00744	9.14376e-10	2.14338e-08
Cs7g04490	-1.2915	7.59685	9.31243e-10	2.17813e-08
Cs5g32820	-1.41708	3.8584	9.31372e-10	2.17813e-08
orange1.1t01398	-1.40877	4.60494	9.65411e-10	2.24986e-08
Cs2g04760	-1.30773	3.91633	9.681e-10	2.2535e-08
orange1.1t03240	-1.1438	4.67514	9.71098e-10	2.25786e-08
Cs6g10180	1.0487	6.97897	9.74991e-10	2.26428e-08
Cs8g05990	1.41907	4.14627	9.87632e-10	2.29099e-08
orange1.1t00555	1.01292	6.74593	1.02049e-09	2.36446e-08
Cs7g09100	1.27792	7.91607	1.02321e-09	2.36804e-08
Cs4g10860	-1.14799	5.37429	1.05622e-09	2.44161e-08
orange1.1t02207	-1.19823	5.90814	1.0736e-09	2.47893e-08
Cs5g15130	-1.3669	6.23382	1.08645e-09	2.50572e-08
Cs4g18730	1.63616	8.21526	1.09472e-09	2.52188e-08
orange1.1t01654	1.35262	5.94587	1.12205e-09	2.58188e-08
Cs7g03830	-1.09692	5.18677	1.12422e-09	2.58383e-08
Cs2g16620	-1.32526	4.51857	1.12548e-09	2.58383e-08
Cs7g04160	3.02593	2.63288	1.1429e-09	2.62082e-08
Cs2g28830	1.26525	6.31891	1.16045e-09	2.65499e-08
Cs7g25930	1.18418	4.66816	1.19427e-09	2.72293e-08
Cs6g07100	-1.30851	4.66767	1.19514e-09	2.72293e-08
Cs2g27650	-1.10967	6.78812	1.20136e-09	2.733e-08
Cs3g24860	1.58255	5.01999	1.21301e-09	2.75636e-08
Cs1g26210	-1.6107	3.80698	1.22683e-09	2.7846e-08
orange1.1t00635	1.1537	7.28287	1.22879e-09	2.7859e-08
Cs4g15220	1.00523	8.3019	1.2849e-09	2.90982e-08
Cs1g21600	-1.28364	4.71902	1.2864e-09	2.90994e-08
orange1.1t00498	-1.80684	2.88809	1.31085e-09	2.9619e-08
Cs4g02520	1.19555	9.31319	1.32545e-09	2.99153e-08
Cs1g17310	1.16663	5.08551	1.32999e-09	2.99839e-08
Cs1g24030	-2.63403	2.99043	1.33964e-09	3.01676e-08
Cs4g08440	-1.47633	3.66701	1.35146e-09	3.03994e-08
Cs5g07250	-1.36605	4.39076	1.39942e-09	3.14431e-08
orange1.1t00643	-1.79965	3.77602	1.45553e-09	3.26306e-08
Cs7g32280	-1.27582	4.10929	1.48788e-09	3.33186e-08
Cs1g05970	1.72297	4.02948	1.49513e-09	3.34436e-08
Cs5g29580	1.10134	6.42859	1.51386e-09	3.38248e-08
Cs6g20030	-2.89478	5.5062	1.53307e-09	3.42158e-08
Cs7g29770	2.19966	2.69162	1.53556e-09	3.42333e-08
Cs6g21540	1.04214	10.2479	1.5439e-09	3.43809e-08
Cs9g16270	-1.14149	5.26446	1.55713e-09	3.4637e-08
Cs3g05770	1.75908	3.60649	1.56491e-09	3.47716e-08
Cs2g05610	1.15143	7.0523	1.57872e-09	3.50394e-08
orange1.1t02586	-2.33344	2.10797	1.58548e-09	3.51506e-08
Cs3g16540	1.26845	6.11141	1.59713e-09	3.53697e-08
Cs6g11935	-1.86063	3.09592	1.61034e-09	3.56229e-08
orange1.1t01779	-1.17327	6.32603	1.64925e-09	3.64035e-08
Cs4g06340	1.54867	4.30084	1.67328e-09	3.68122e-08
Cs9g06130	4.35295	1.0225	1.71524e-09	3.7694e-08
Cs3g16150	-1.13116	5.50451	1.7282e-09	3.78956e-08
Cs1g15390	-1.99446	3.29002	1.73741e-09	3.80559e-08
Cs8g01920	-1.1014	5.07023	1.81357e-09	3.96808e-08
Cs5g25680	-1.59603	3.41103	1.82979e-09	3.9992e-08
orange1.1t01356	-4.28002	0.518189	1.881e-09	4.10217e-08
orange1.1t00655	1.30773	3.86314	1.88996e-09	4.11723e-08
Cs7g30000	-1.10276	4.6542	1.90915e-09	4.15453e-08
Cs9g02090	1.21718	8.15752	1.94419e-09	4.22161e-08
Cs7g15950	1.11236	4.7281	1.96368e-09	4.25932e-08
Cs5g04750	-1.31394	3.91297	2.09746e-09	4.52987e-08
Cs4g09330	1.20373	4.90758	2.11271e-09	4.55791e-08
Cs5g03580	-3.22887	1.80735	2.34492e-09	5.03292e-08
Cs1g19740	-1.51883	3.98818	2.34545e-09	5.03292e-08
Cs2g10740	1.20678	4.59912	2.39238e-09	5.12814e-08
Cs2g09630	-2.14806	2.20059	2.39898e-09	5.1368e-08
Cs5g29830	2.27442	5.7169	2.4513e-09	5.24323e-08
orange1.1t05301	-2.52985	2.14381	2.50399e-09	5.34452e-08
Cs5g18970	-1.34668	3.76367	2.58705e-09	5.51006e-08
Cs2g04080	1.06867	4.93723	2.62069e-09	5.57577e-08
Cs2g04800	-4.50383	0.444239	2.63298e-09	5.59496e-08
Cs2g31040	-2.53249	2.49189	2.63529e-09	5.59496e-08
Cs3g24950	-1.06765	5.16378	2.65571e-09	5.63051e-08
Cs9g04400	-1.14722	4.999	2.65765e-09	5.63051e-08
Cs9g18900	-1.29502	4.47129	2.66188e-09	5.63353e-08
Cs6g15870	1.12979	7.28988	2.79982e-09	5.90674e-08
Cs3g25850	-2.02233	3.24204	2.85716e-09	6.02136e-08
Cs3g03970	2.27129	6.00358	2.91914e-09	6.14553e-08
Cs3g27610	-1.01188	6.82747	3.01498e-09	6.32735e-08
Cs6g11600	-1.33093	5.34155	3.18288e-09	6.66575e-08
Cs5g01210	-1.31103	3.77373	3.20772e-09	6.71077e-08
Cs7g04390	-1.07458	7.33073	3.25156e-09	6.78041e-08
Cs2g01770	1.30133	4.90995	3.25394e-09	6.78041e-08
Cs7g07980	1.90485	2.5739	3.25454e-09	6.78041e-08
Cs7g01390	1.82741	4.34059	3.34069e-09	6.95265e-08
Cs8g09070	-4.0711	1.66261	3.36491e-09	6.99581e-08
Cs2g25280	-1.05645	5.17873	3.47957e-09	7.22669e-08
Cs6g02030	-1.57588	3.58317	3.48662e-09	7.23383e-08
Cs9g18600	1.01648	7.78641	3.50649e-09	7.26754e-08
Cs6g15380	2.73503	1.71834	3.61143e-09	7.45606e-08
Cs2g03560	-1.65196	4.01971	3.61233e-09	7.45606e-08
Cs1g23410	-2.05937	2.30193	3.65265e-09	7.53152e-08
Cs2g04300	1.27664	5.25964	3.74179e-09	7.7074e-08
Cs8g02230	2.44685	2.33222	3.74947e-09	7.71528e-08
Cs4g10240	1.54835	7.17558	3.83695e-09	7.88719e-08
Cs6g19760	-1.51594	5.9334	3.86204e-09	7.93064e-08
Cs9g06110	-7.23934	-0.302058	3.93868e-09	8.07974e-08
Cs2g08410	-1.20468	4.12607	4.07622e-09	8.35333e-08
orange1.1t04803	2.08001	2.69714	4.10307e-09	8.39977e-08
Cs7g27910	1.37674	4.04609	4.44216e-09	9.0582e-08
orange1.1t04594	1.71067	3.63669	4.44278e-09	9.0582e-08
Cs4g11370	-1.78706	3.97995	4.62526e-09	9.41112e-08
Cs6g21420	1.31155	5.89852	4.63795e-09	9.42737e-08
Cs8g01470	1.01631	5.25518	4.654e-09	9.45039e-08
Cs5g23840	-2.40354	4.20274	4.76004e-09	9.65595e-08
Cs1g13290	1.15174	4.77544	4.85394e-09	9.83647e-08
Cs7g13160	1.06638	7.41963	4.89627e-09	9.91223e-08
orange1.1t03073	1.18344	4.32269	4.99155e-09	1.00847e-07
Cs1g11390	-1.53722	4.45938	5.0284e-09	1.0149e-07
Cs3g11590	2.03731	4.33287	5.57941e-09	1.12159e-07
Cs7g03750	1.34923	5.88345	5.60296e-09	1.1252e-07
Cs3g17090	1.61427	3.01495	5.64909e-09	1.13219e-07
Cs6g07320	1.07496	5.81081	5.72862e-09	1.14698e-07
Cs1g25540	-2.94848	3.40985	5.82149e-09	1.16325e-07
Cs4g13160	-1.96236	4.23787	5.88071e-09	1.17158e-07
Cs9g17250	1.0598	7.1417	5.94094e-09	1.18123e-07
Cs3g16430	2.27618	3.42398	6.08211e-09	1.2081e-07
Cs3g15380	-1.12639	9.0831	6.10614e-09	1.21048e-07
Cs1g04910	-1.37121	5.89984	6.25856e-09	1.23881e-07
Cs3g13710	1.53617	4.70201	6.26142e-09	1.23881e-07
Cs7g16680	-4.39837	0.352637	6.36406e-09	1.25664e-07
Cs3g11620	1.89183	3.6193	6.40185e-09	1.26285e-07
orange1.1t01255	-1.35095	4.65565	6.4275e-09	1.26667e-07
orange1.1t04983	-3.03814	3.59699	6.49332e-09	1.27838e-07
Cs5g02790	-3.8321	2.1207	7.18217e-09	1.40846e-07
Cs5g15790	-1.14657	4.68113	7.18982e-09	1.40859e-07
orange1.1t01006	-1.8138	3.14167	7.2257e-09	1.41423e-07
Cs2g25520	-1.28355	5.36054	7.30803e-09	1.42895e-07
Cs8g17200	2.20182	3.24588	7.32388e-09	1.43066e-07
Cs3g05360	-1.73744	4.1615	7.5241e-09	1.46834e-07
Cs3g25180	-1.13825	5.61683	7.58609e-09	1.47791e-07
Cs3g17390	1.89436	6.54405	7.58791e-09	1.47791e-07
Cs4g11780	-2.2863	1.99562	7.64338e-09	1.48727e-07
Cs6g17110	-1.59746	3.18919	7.90987e-09	1.53763e-07
Cs5g15030	-1.21291	4.1447	8.08048e-09	1.56927e-07
Cs6g08920	1.40657	3.72051	8.28397e-09	1.60724e-07
Cs1g11430	1.01896	4.72968	8.41155e-09	1.63041e-07
Cs1g25250	-7.33823	-0.219501	8.41997e-09	1.63046e-07
orange1.1t00546	-1.63065	2.95817	8.85197e-09	1.71081e-07
Cs6g15770	2.71844	1.92734	8.91022e-09	1.72041e-07
Cs7g08080	1.58282	3.42988	8.92077e-09	1.72079e-07
Cs5g15780	-1.25292	3.81337	9.01572e-09	1.73743e-07
Cs1g23530	-1.1101	4.36594	9.08925e-09	1.74824e-07
Cs1g23600	1.7946	4.37588	9.11923e-09	1.75233e-07
orange1.1t02775	1.11008	4.57678	9.27924e-09	1.77966e-07
Cs3g24610	1.04469	5.42213	9.36971e-09	1.79529e-07
Cs5g01970	1.06421	7.60552	9.38886e-09	1.79725e-07
Cs3g14970	-1.33114	4.09343	9.43798e-09	1.80492e-07
Cs5g29020	1.00059	6.28769	9.79141e-09	1.86717e-07
Cs3g02030	-1.38697	3.59744	1.02355e-08	1.94814e-07
Cs4g14510	1.84775	2.80485	1.03998e-08	1.97755e-07
Cs3g24280	4.3058	0.292804	1.04903e-08	1.99285e-07
Cs1g01190	-1.38031	4.36262	1.08687e-08	2.06279e-07
Cs2g23280	-1.84802	4.17642	1.12644e-08	2.13586e-07
Cs6g18510	-1.98115	3.02399	1.12756e-08	2.13597e-07
Cs4g05920	-2.79918	2.61315	1.18429e-08	2.23498e-07
Cs9g06440	-1.10315	5.21654	1.19021e-08	2.2437e-07
Cs4g16000	-1.45206	4.49942	1.20368e-08	2.26519e-07
Cs6g04550	-2.7272	1.77192	1.22019e-08	2.29409e-07
Cs7g08730	-2.01824	3.07402	1.22756e-08	2.30394e-07
orange1.1t01624	-3.32082	0.90619	1.22773e-08	2.30394e-07
Cs4g09240	-1.32246	3.99635	1.23141e-08	2.30841e-07
orange1.1t06054	1.25137	4.34132	1.23241e-08	2.30841e-07
Cs7g19810	1.29401	4.03911	1.25432e-08	2.34507e-07
Cs6g02630	1.40365	4.4554	1.25599e-08	2.34599e-07
Cs2g13450	-4.26453	2.69339	1.29387e-08	2.41001e-07
Cs6g15300	1.01228	9.42446	1.3007e-08	2.42048e-07
Cs8g16930	-1.8841	3.03847	1.31387e-08	2.44046e-07
Cs2g17040	-2.21375	1.80649	1.36378e-08	2.52848e-07
Cs1g01540	1.21616	9.04607	1.37353e-08	2.5442e-07
Cs7g05170	1.13629	5.05143	1.41562e-08	2.61732e-07
Cs3g26820	1.03936	5.4308	1.52967e-08	2.82298e-07
Cs5g11430	-1.22597	4.38227	1.5626e-08	2.87847e-07
Cs1g02000	1.3617	3.74008	1.60416e-08	2.94959e-07
Cs5g09050	-1.98461	3.77236	1.60817e-08	2.95427e-07
Cs7g21340	2.65547	2.99164	1.62492e-08	2.98229e-07
Cs9g16360	1.00034	5.73957	1.62658e-08	2.9826e-07
orange1.1t04786	-2.19401	2.27744	1.66068e-08	3.04235e-07
orange1.1t01402	-1.20482	4.43969	1.69686e-08	3.0973e-07
orange1.1t00424	-1.62568	3.18743	1.70082e-08	3.10171e-07
Cs7g31060	1.21791	4.53434	1.70237e-08	3.10171e-07
Cs8g03700	1.47211	3.75355	1.71004e-08	3.11287e-07
Cs6g09420	1.69032	4.54799	1.83649e-08	3.32793e-07
Cs3g01870	-1.48099	3.68054	1.84998e-08	3.34632e-07
Cs5g05240	2.17192	2.17465	1.86025e-08	3.36187e-07
Cs2g18260	2.12493	2.17884	1.88705e-08	3.40417e-07
Cs9g07600	-1.32927	4.25571	1.92396e-08	3.46474e-07
Cs6g10550	1.09124	5.47073	1.92408e-08	3.46474e-07
Cs5g34060	1.15058	4.3281	2.00565e-08	3.60513e-07
Cs2g23850	-1.6527	3.52936	2.02406e-08	3.63172e-07
Cs5g27080	-1.30396	4.06686	2.03152e-08	3.64184e-07
Cs2g09430	-1.90127	2.85291	2.07611e-08	3.71513e-07
orange1.1t05003	1.12933	4.25711	2.14058e-08	3.82707e-07
Cs1g13250	1.35977	3.78408	2.149e-08	3.8387e-07
Cs2g20750	-3.80132	0.840364	2.15749e-08	3.85043e-07
Cs5g06980	1.06663	5.44433	2.17283e-08	3.87436e-07
Cs8g01590	-1.49332	3.05851	2.18956e-08	3.90072e-07
Cs1g17290	-1.01836	5.09707	2.19862e-08	3.9134e-07
Cs2g21560	-1.05457	5.58912	2.2454e-08	3.9931e-07
Cs8g16920	-2.07355	2.05874	2.26894e-08	4.03139e-07
Cs4g02300	-1.91609	2.52482	2.29162e-08	4.06809e-07
Cs1g21020	-1.38598	4.9563	2.31346e-08	4.10322e-07
Cs3g23490	-1.55355	4.52834	2.32133e-08	4.11354e-07
Cs4g08690	1.40573	4.14021	2.40084e-08	4.25067e-07
Cs2g13120	-1.34485	4.22837	2.41336e-08	4.26906e-07
orange1.1t00392	1.0486	5.66209	2.43241e-08	4.29897e-07
Cs9g06630	1.00174	8.97004	2.44933e-08	4.32358e-07
Cs3g11310	-1.22074	4.21331	2.45064e-08	4.32358e-07
Cs6g13250	7.4164	-0.145396	2.46899e-08	4.35211e-07
Cs3g24360	2.11028	2.16742	2.47318e-08	4.35566e-07
Cs2g09620	-1.74148	3.96466	2.52579e-08	4.44442e-07
Cs9g02720	1.25992	5.31864	2.5542e-08	4.48653e-07
Cs6g13110	-2.68596	1.34628	2.59877e-08	4.56081e-07
Cs7g21860	1.62103	3.93862	2.60927e-08	4.57524e-07
Cs7g12100	2.05098	3.16507	2.61216e-08	4.57631e-07
Cs3g16380	1.69819	5.73685	2.62605e-08	4.59662e-07
Cs4g03510	1.05965	9.4746	2.65591e-08	4.64483e-07
Cs5g09300	-1.0829	7.13712	2.68127e-08	4.6851e-07
Cs5g15150	-1.62342	2.84041	2.74596e-08	4.78978e-07
orange1.1t01171	-3.30317	0.553573	2.76098e-08	4.81178e-07
Cs4g18400	-1.04307	6.21529	2.77916e-08	4.83507e-07
orange1.1t02482	1.61936	4.61986	2.79693e-08	4.86176e-07
Cs5g08860	-6.00198	0.255062	2.91256e-08	5.05398e-07
Cs6g20970	-1.63611	3.26303	2.94517e-08	5.10616e-07
Cs3g20290	1.61392	3.49088	2.96213e-08	5.13111e-07
Cs2g25150	1.11655	7.08988	3.06315e-08	5.29694e-07
Cs5g05830	-1.23254	3.75335	3.11979e-08	5.39025e-07
Cs5g07760	1.01182	4.63971	3.181e-08	5.48655e-07
Cs8g13590	-1.74919	2.54539	3.21224e-08	5.53566e-07
Cs1g19700	-1.36568	4.30371	3.22618e-08	5.5549e-07
Cs4g18120	1.23981	9.06252	3.28212e-08	5.64152e-07
Cs9g03190	-2.29644	2.82694	3.29896e-08	5.66445e-07
orange1.1t00477	-1.17906	4.23514	3.3672e-08	5.76798e-07
orange1.1t00459	-1.18125	4.7299	3.38642e-08	5.78987e-07
Cs6g15600	-1.52884	3.07726	3.38864e-08	5.78987e-07
orange1.1t02122	-1.79077	3.20096	3.40616e-08	5.81485e-07
Cs3g21105	1.55948	6.33198	3.41284e-08	5.82128e-07
Cs1g13960	-1.06218	6.32129	3.43365e-08	5.8518e-07
orange1.1t04220	-6.03474	0.283719	3.4834e-08	5.93154e-07
Cs6g04900	-1.08985	4.59566	3.60559e-08	6.11882e-07
Cs1g19830	1.37601	8.96577	3.66473e-08	6.20866e-07
Cs1g22490	1.24151	4.1372	3.6778e-08	6.22554e-07
Cs9g04790	-1.17355	4.45825	3.68551e-08	6.23332e-07
Cs3g13940	1.2586	3.97753	3.72145e-08	6.28351e-07
Cs2g02610	-1.44064	3.89717	3.76333e-08	6.33849e-07
orange1.1t01434	1.20029	3.79228	3.7635e-08	6.33849e-07
Cs8g19720	1.6982	4.25677	3.77436e-08	6.3484e-07
Cs1g13070	1.39331	3.80362	3.80805e-08	6.3974e-07
Cs3g13210	-1.15746	5.25299	3.88884e-08	6.52765e-07
Cs4g09690	-1.3889	4.1247	3.89491e-08	6.53236e-07
Cs7g16030	1.15623	7.00922	3.9792e-08	6.66816e-07
Cs5g09800	1.3552	3.61011	4.24991e-08	7.1099e-07
Cs1g17780	-1.10471	5.10935	4.39183e-08	7.3412e-07
Cs2g02310	-1.10759	6.11244	4.43342e-08	7.40455e-07
Cs3g27200	3.94084	0.250131	4.52053e-08	7.53199e-07
Cs9g14190	-2.5058	1.38627	4.57974e-08	7.61087e-07
Cs6g17590	1.75842	5.18487	4.59504e-08	7.62997e-07
Cs3g23980	1.15508	4.21291	4.71236e-08	7.81184e-07
Cs2g14990	1.43423	3.974	4.73781e-08	7.84754e-07
Cs6g02700	2.22069	2.80959	4.80509e-08	7.94286e-07
orange1.1t04009	1.03049	4.46728	4.80725e-08	7.94286e-07
Cs7g32410	-2.74475	3.99367	4.8852e-08	8.05174e-07
Cs3g16890	-1.22997	3.97232	4.90926e-08	8.08475e-07
Cs2g22320	2.19635	2.54742	5.00013e-08	8.22764e-07
orange1.1t00416	2.64002	3.23889	5.23522e-08	8.59331e-07
Cs3g27320	1.87548	5.29839	5.322e-08	8.72861e-07
Cs4g02250	-1.21359	4.482	5.36467e-08	8.79138e-07
Cs3g25990	-1.1949	4.42777	5.49484e-08	8.99001e-07
Cs6g15800	-1.03826	5.38976	5.75931e-08	9.40735e-07
Cs4g17400	2.92929	1.79898	5.99723e-08	9.76413e-07
Cs9g14060	-3.4648	0.811129	6.01486e-08	9.78489e-07
Cs4g20560	-1.23416	4.50002	6.03733e-08	9.80668e-07
Cs5g03100	3.94005	0.249832	6.07682e-08	9.86167e-07
Cs3g26790	-2.51958	1.99564	6.46836e-08	1.04716e-06
Cs8g17960	1.41055	4.23392	6.52604e-08	1.05395e-06
Cs3g02740	-1.245	4.0112	6.54659e-08	1.05642e-06
Cs9g13460	1.16437	5.22381	6.61688e-08	1.0669e-06
Cs9g09080	-1.41319	5.0427	6.67619e-08	1.0756e-06
Cs1g12290	1.33838	3.34579	6.6878e-08	1.0766e-06
Cs7g15980	-1.21009	4.2363	6.75194e-08	1.08605e-06
Cs8g15180	-1.06841	4.19787	6.76497e-08	1.08661e-06
Cs2g30870	2.02218	2.23463	6.76627e-08	1.08661e-06
Cs6g21550	1.32586	3.43547	7.18408e-08	1.15003e-06
Cs9g05160	-1.23823	3.73144	7.19471e-08	1.15081e-06
Cs5g08500	1.30279	7.05169	7.33078e-08	1.1707e-06
Cs2g08040	-1.2563	3.62253	7.45009e-08	1.18881e-06
Cs7g09080	-1.88971	2.71533	7.80116e-08	1.24088e-06
Cs7g02500	-1.57408	4.90837	7.93881e-08	1.26177e-06
Cs4g07840	1.10785	7.96642	8.10432e-08	1.28604e-06
orange1.1t00727	-1.38974	3.73933	8.19242e-08	1.29899e-06
Cs2g30150	-2.07961	2.14717	8.25677e-08	1.30713e-06
Cs7g07930	2.29119	1.79986	8.2652e-08	1.30743e-06
Cs2g02390	-3.2241	2.23879	8.41472e-08	1.33003e-06
Cs3g24130	-1.08044	4.44943	9.16634e-08	1.44201e-06
Cs7g02340	1.22135	4.16229	9.22626e-08	1.4503e-06
Cs3g06120	-1.17298	4.16794	9.27574e-08	1.45693e-06
Cs2g18210	1.90841	2.49149	9.29868e-08	1.45751e-06
Cs3g04800	1.12297	4.90069	9.30122e-08	1.45751e-06
Cs7g23080	1.3836	4.00507	9.68658e-08	1.51434e-06
Cs1g18190	-1.16209	4.20282	9.7552e-08	1.52388e-06
orange1.1t02745	1.02066	5.10529	9.88133e-08	1.54238e-06
Cs7g21630	3.66226	0.425958	9.90097e-08	1.54304e-06
Cs3g15710	-2.12022	1.93823	1.01219e-07	1.57503e-06
orange1.1t03475	-1.34325	6.45602	1.02324e-07	1.59099e-06
orange1.1t01388	2.22367	2.35644	1.02495e-07	1.5924e-06
Cs5g31040	1.00129	4.77397	1.02888e-07	1.59654e-06
orange1.1t03953	-1.30245	5.82946	1.0292e-07	1.59654e-06
Cs2g04830	-1.12482	4.21299	1.03276e-07	1.60081e-06
Cs1g24500	-1.35409	7.53035	1.03908e-07	1.60937e-06
Cs2g31350	2.52599	1.23482	1.04343e-07	1.61486e-06
Cs1g08720	-2.40547	1.58325	1.07604e-07	1.66147e-06
Cs6g15760	1.04645	6.96393	1.10111e-07	1.69888e-06
Cs1g19320	-1.50067	5.09521	1.11247e-07	1.71508e-06
Cs4g01030	-1.18302	4.02057	1.14092e-07	1.75759e-06
Cs5g16290	-1.67487	3.98588	1.15237e-07	1.7726e-06
Cs9g09780	3.25525	1.29828	1.15243e-07	1.7726e-06
Cs2g01510	-1.52735	2.86415	1.18829e-07	1.82217e-06
Cs4g09310	-1.00347	5.73254	1.19e-07	1.8234e-06
Cs7g19420	-1.53818	4.2926	1.20555e-07	1.8444e-06
Cs7g16280	1.13968	4.68571	1.22091e-07	1.86647e-06
Cs3g22060	-1.38328	3.31368	1.22206e-07	1.86681e-06
Cs4g02190	-1.28806	3.55234	1.30195e-07	1.98176e-06
Cs8g04700	2.68588	3.96076	1.3025e-07	1.98176e-06
Cs2g10320	-2.0478	1.99538	1.32123e-07	2.00606e-06
Cs3g19260	-2.25436	1.99572	1.33065e-07	2.01885e-06
Cs4g15260	-2.35983	2.07966	1.35011e-07	2.04526e-06
Cs7g30170	-2.79493	3.34111	1.36128e-07	2.06063e-06
Cs2g28420	-4.55151	0.150086	1.39379e-07	2.10191e-06
Cs3g21490	-1.64248	2.74357	1.42329e-07	2.13733e-06
Cs9g05650	-1.16552	4.63671	1.42367e-07	2.13733e-06
Cs5g18600	-1.93639	2.25928	1.45193e-07	2.17648e-06
orange1.1t02114	-1.04991	4.57559	1.46075e-07	2.18807e-06
Cs5g09080	-4.43583	0.0537379	1.48897e-07	2.22797e-06
Cs2g15310	-3.0322	0.76092	1.48961e-07	2.22797e-06
Cs6g10310	-1.09789	4.44739	1.49258e-07	2.23074e-06
Cs5g31430	-1.30119	3.96249	1.49537e-07	2.23325e-06
Cs7g06450	-1.06248	4.1942	1.51905e-07	2.26355e-06
Cs2g07120	1.28392	4.30241	1.53928e-07	2.29199e-06
orange1.1t02105	1.0261	4.77334	1.57327e-07	2.33566e-06
Cs2g26550	-1.07228	6.23961	1.57671e-07	2.33847e-06
orange1.1t02758	-1.53611	4.89324	1.57749e-07	2.33847e-06
Cs4g06915	1.11059	4.21232	1.59985e-07	2.36811e-06
Cs9g13580	-3.08055	0.801055	1.60631e-07	2.37592e-06
Cs1g16650	4.22219	0.488347	1.61949e-07	2.39364e-06
Cs2g16940	-1.71245	2.89719	1.64012e-07	2.42057e-06
Cs7g04200	-1.20931	4.18712	1.65161e-07	2.43573e-06
Cs7g06030	-1.63582	5.87329	1.65563e-07	2.43987e-06
Cs1g08600	1.1292	4.1862	1.6784e-07	2.47161e-06
Cs1g12520	-2.25946	2.56668	1.69367e-07	2.49226e-06
Cs7g14420	-1.87086	2.33939	1.77584e-07	2.60552e-06
Cs7g10080	1.1769	4.2158	1.81389e-07	2.65746e-06
Cs7g22600	-1.23865	3.88407	1.82877e-07	2.67729e-06
Cs3g16240	2.47906	2.6935	1.84149e-07	2.69199e-06
Cs9g13500	-1.67419	2.38285	1.84469e-07	2.6947e-06
Cs3g21530	-1.49172	6.49021	1.85788e-07	2.71198e-06
Cs7g27620	3.58764	1.04804	1.86844e-07	2.72543e-06
Cs8g01880	2.12172	5.0822	1.87259e-07	2.72949e-06
Cs4g09530	1.00507	4.35203	1.88805e-07	2.75002e-06
Cs9g09700	-1.25045	4.09246	1.9082e-07	2.77735e-06
Cs2g03950	-2.21846	2.69208	2.05706e-07	2.97673e-06
Cs5g29680	-1.98471	1.947	2.06923e-07	2.99218e-06
Cs1g12440	1.733	2.1719	2.0789e-07	3.00182e-06
Cs4g17260	1.22697	5.7718	2.08511e-07	3.00646e-06
orange1.1t03831	-1.99625	3.75254	2.09927e-07	3.02469e-06
Cs7g06460	-1.29016	3.45516	2.1068e-07	3.03336e-06
Cs3g05810	-1.19237	5.4548	2.12414e-07	3.05614e-06
Cs5g06920	-1.08231	5.21831	2.18167e-07	3.13217e-06
Cs4g03200	1.64301	4.11593	2.18331e-07	3.13227e-06
Cs5g18660	-1.83465	2.557	2.21825e-07	3.17803e-06
Cs8g01970	2.52459	2.25657	2.24162e-07	3.20674e-06
Cs9g19280	-1.13795	4.27139	2.24506e-07	3.20937e-06
Cs4g18560	-1.51498	3.33299	2.27172e-07	3.24202e-06
orange1.1t01956	-1.82101	3.68952	2.27275e-07	3.24202e-06
Cs2g10550	1.05733	5.352	2.29412e-07	3.27018e-06
orange1.1t00199	-1.30461	3.80017	2.29952e-07	3.27555e-06
Cs2g30390	1.0068	8.95791	2.31518e-07	3.29552e-06
Cs1g06910	1.08795	5.42637	2.32045e-07	3.30066e-06
Cs7g06180	-1.16045	3.89755	2.33911e-07	3.32486e-06
Cs1g22910	1.49254	3.56632	2.35212e-07	3.34098e-06
Cs5g29690	-1.05307	4.31511	2.40574e-07	3.41472e-06
Cs1g11110	-1.08948	4.30211	2.47281e-07	3.50389e-06
Cs7g13180	1.96422	2.47523	2.47381e-07	3.50389e-06
Cs4g03640	-1.54861	2.85238	2.54848e-07	3.60202e-06
Cs5g04870	-1.05117	4.64542	2.55481e-07	3.60843e-06
Cs3g27870	-1.65652	2.65612	2.61364e-07	3.68631e-06
orange1.1t01401	-2.05409	2.281	2.69301e-07	3.79026e-06
Cs2g31260	2.0564	2.99032	2.69895e-07	3.79595e-06
Cs4g09280	1.05692	4.60573	2.74113e-07	3.85257e-06
Cs1g01110	4.0309	0.547772	2.75709e-07	3.87229e-06
Cs5g14540	-2.00552	3.72802	2.83102e-07	3.97056e-06
orange1.1t03429	1.0073	5.51329	2.87045e-07	4.02024e-06
Cs8g15960	-1.09736	4.49553	2.89823e-07	4.05347e-06
Cs1g02530	-1.78171	2.34982	2.90695e-07	4.06284e-06
orange1.1t04113	-2.80618	1.67832	2.94922e-07	4.11863e-06
Cs1g26620	1.65425	2.43846	2.9662e-07	4.13699e-06
orange1.1t03034	-1.26731	4.72746	2.9933e-07	4.16899e-06
Cs7g31410	-2.04648	4.52876	3.05617e-07	4.25064e-06
Cs9g01650	-1.78651	3.04881	3.23916e-07	4.48647e-06
Cs2g06710	-1.162	5.06261	3.33346e-07	4.60753e-06
Cs3g25800	-1.03252	5.02375	3.34835e-07	4.62493e-06
Cs5g28500	1.00996	4.86618	3.36251e-07	4.64128e-06
Cs1g19610	-1.38894	3.24068	3.41535e-07	4.70773e-06
Cs3g25380	1.0306	5.35222	3.43247e-07	4.72808e-06
Cs2g07790	1.08445	4.31865	3.44288e-07	4.73917e-06
Cs2g08760	-1.39394	2.91503	3.47442e-07	4.7793e-06
Cs3g01120	-1.74574	3.94918	3.47687e-07	4.77939e-06
Cs5g10240	1.98565	3.59714	3.56568e-07	4.89141e-06
Cs1g05420	-1.36344	3.32388	3.57877e-07	4.906e-06
Cs2g18170	-1.47325	5.70526	3.58904e-07	4.91672e-06
Cs2g27460	3.33218	2.3489	3.69421e-07	5.04699e-06
Cs3g24200	-2.80103	2.44895	3.71863e-07	5.0769e-06
Cs7g24800	1.3343	3.47461	3.72203e-07	5.07808e-06
Cs5g09600	-2.41127	1.72574	3.74019e-07	5.09938e-06
Cs5g05900	2.58173	2.30436	3.79042e-07	5.16084e-06
Cs5g05010	-1.77796	2.65337	3.90763e-07	5.30961e-06
Cs8g13740	1.0421	6.64872	3.92086e-07	5.31953e-06
orange1.1t01405	-1.23978	3.49842	3.9225e-07	5.31953e-06
Cs3g09140	-1.71479	2.56843	3.92289e-07	5.31953e-06
Cs5g03240	-1.74024	2.62581	3.95367e-07	5.35401e-06
Cs3g11320	-1.57755	3.08962	4.0687e-07	5.49494e-06
Cs8g04720	3.8338	0.161314	4.08724e-07	5.51627e-06
Cs8g17220	-1.03282	6.8226	4.09809e-07	5.52718e-06
Cs8g19530	-1.17979	5.56349	4.10184e-07	5.52852e-06
Cs8g17930	1.84041	2.70539	4.1168e-07	5.54496e-06
Cs2g13860	1.57909	3.31394	4.18142e-07	5.62443e-06
Cs5g33850	-1.70327	3.20626	4.20512e-07	5.64872e-06
Cs1g19400	1.73489	3.80177	4.2688e-07	5.73043e-06
Cs7g01530	-1.76003	4.51938	4.32889e-07	5.8072e-06
Cs5g30570	1.2251	5.30011	4.46533e-07	5.97424e-06
Cs9g16680	-1.21862	4.58097	4.50888e-07	6.02045e-06
Cs1g21820	-1.23059	3.81474	4.58947e-07	6.12397e-06
Cs2g23970	-4.79688	-0.0855949	4.6452e-07	6.1901e-06
Cs4g05030	1.45794	5.9402	4.65162e-07	6.19454e-06
Cs3g03045	-4.37412	0.00307767	4.72581e-07	6.28915e-06
orange1.1t02332	1.05335	4.25669	4.76827e-07	6.34145e-06
Cs8g04610	1.51065	4.45664	4.81666e-07	6.39732e-06
Cs1g08490	-1.51226	2.97576	5.08802e-07	6.72653e-06
Cs3g02720	-1.3957	3.24633	5.13354e-07	6.77776e-06
Cs9g13450	-1.37811	3.67483	5.16636e-07	6.81212e-06
Cs1g15900	-1.08722	3.92038	5.17589e-07	6.8202e-06
orange1.1t04788	-1.74246	2.34978	5.23652e-07	6.89556e-06
Cs6g01180	-1.21788	4.46963	5.28634e-07	6.95659e-06
Cs6g02540	-2.17609	2.39329	5.30982e-07	6.98289e-06
orange1.1t01967	1.24847	3.53511	5.34338e-07	7.02242e-06
Cs5g13070	1.21033	3.84372	5.45951e-07	7.17034e-06
Cs6g10950	-1.25305	4.25731	5.52181e-07	7.24268e-06
Cs1g10640	-1.63717	3.37711	5.67613e-07	7.4305e-06
Cs8g19420	-2.36049	1.18116	5.70868e-07	7.46337e-06
orange1.1t05936	-1.15297	3.9686	5.79689e-07	7.56881e-06
Cs1g08150	-3.14116	1.25586	5.88555e-07	7.67457e-06
Cs2g17260	-1.65564	3.06528	5.89027e-07	7.67574e-06
Cs3g16330	-1.76786	2.35283	5.99667e-07	7.80424e-06
Cs2g01840	1.02163	7.10345	6.05645e-07	7.87181e-06
orange1.1t01827	1.08243	4.528	6.06173e-07	7.87357e-06
orange1.1t03024	1.69442	8.15247	6.10616e-07	7.92102e-06
Cs2g03990	-1.44493	3.11549	6.20246e-07	8.04073e-06
Cs8g03370	-1.38035	3.7876	6.23778e-07	8.07608e-06
Cs4g04990	-3.38006	0.338849	6.23779e-07	8.07608e-06
Cs9g05020	-1.21902	5.52553	6.30091e-07	8.15254e-06
Cs4g17900	-2.22215	2.15492	6.3321e-07	8.18233e-06
Cs4g17540	-1.2932	3.70426	6.33716e-07	8.18359e-06
Cs3g23260	-1.4721	3.68837	6.37004e-07	8.22076e-06
orange1.1t00104	-1.82307	2.43811	6.49107e-07	8.36618e-06
Cs4g20030	-1.03004	6.22813	6.60687e-07	8.49903e-06
Cs2g03330	2.34957	2.58661	6.94608e-07	8.9125e-06
Cs8g01670	1.59327	6.54214	6.96045e-07	8.92523e-06
Cs3g08550	-2.5073	2.07174	7.01067e-07	8.97814e-06
Cs4g11560	-1.25285	3.32871	7.06262e-07	9.03312e-06
orange1.1t00308	-1.36263	5.49305	7.10436e-07	9.08069e-06
Cs6g08840	1.02678	9.72505	7.10887e-07	9.08069e-06
Cs7g09390	-1.46163	5.32105	7.2634e-07	9.27217e-06
Cs6g16990	2.67508	1.08155	7.57748e-07	9.64853e-06
Cs2g02230	-1.40765	3.36821	7.58904e-07	9.65098e-06
Cs7g04400	-1.67691	2.24076	7.70149e-07	9.78601e-06
Cs9g02120	-1.30077	3.09096	7.70498e-07	9.78601e-06
Cs3g16590	-1.43693	3.83829	7.76894e-07	9.85475e-06
Cs7g28130	1.14739	4.59076	7.80871e-07	9.89894e-06
Cs2g09160	1.20961	5.107	7.84237e-07	9.92905e-06
Cs7g31360	1.28099	4.3302	8.19349e-07	1.03409e-05
orange1.1t01783	1.82133	2.15278	8.20852e-07	1.03534e-05
Cs4g09450	3.31921	0.307269	8.26149e-07	1.04071e-05
Cs5g22130	-1.35876	3.41574	8.37857e-07	1.05413e-05
Cs3g20720	1.47734	3.81872	8.50207e-07	1.069e-05
Cs2g21235	1.76405	4.43523	8.66326e-07	1.0879e-05
Cs2g14710	-1.50432	3.37676	9.01929e-07	1.12978e-05
Cs2g17810	1.71839	3.66035	9.11594e-07	1.14117e-05
orange1.1t04964	-1.08558	4.34776	9.18111e-07	1.14861e-05
orange1.1t01420	-6.68454	-0.746123	9.22856e-07	1.15311e-05
Cs2g20860	-1.00693	4.57234	9.27934e-07	1.15873e-05
Cs6g21270	6.77788	-0.66504	9.2855e-07	1.15878e-05
orange1.1t01523	-1.21676	5.39557	9.32357e-07	1.16208e-05
Cs5g08340	1.0605	5.46332	9.35199e-07	1.1649e-05
Cs5g22800	-1.87554	1.96907	9.47374e-07	1.17933e-05
Cs3g03130	2.61252	3.83984	9.50805e-07	1.18214e-05
Cs4g02990	2.87292	1.18223	9.69982e-07	1.20448e-05
Cs8g14090	-1.71202	2.53055	1.00212e-06	1.24055e-05
Cs6g03010	-1.04179	3.99257	1.03224e-06	1.27626e-05
Cs3g20340	-1.95341	2.55473	1.035e-06	1.27889e-05
Cs7g08690	1.74576	3.06939	1.04912e-06	1.29473e-05
Cs9g09750	-1.18539	4.56696	1.05457e-06	1.29972e-05
Cs8g10690	-1.3688	3.17367	1.0551e-06	1.29972e-05
Cs3g26750	-1.32199	3.42377	1.06027e-06	1.30528e-05
Cs2g19920	1.47354	3.20157	1.07691e-06	1.32494e-05
Cs4g02970	-2.02657	3.2991	1.09816e-06	1.34867e-05
orange1.1t03544	-2.2491	1.72028	1.09981e-06	1.34981e-05
Cs2g10090	-1.68204	4.59017	1.10361e-06	1.35336e-05
Cs8g04350	1.3936	3.09365	1.1054e-06	1.35336e-05
orange1.1t01815	1.24715	4.40053	1.10955e-06	1.35761e-05
Cs1g05460	2.80389	1.51155	1.12605e-06	1.37528e-05
Cs5g21920	2.65757	1.00624	1.1596e-06	1.41304e-05
Cs8g02960	-1.31722	3.86792	1.15979e-06	1.41304e-05
Cs9g16940	6.87975	-0.585461	1.17852e-06	1.43325e-05
Cs4g03940	1.10316	4.51854	1.19308e-06	1.44831e-05
Cs1g22470	-1.62384	2.78165	1.19947e-06	1.45506e-05
Cs4g09900	-3.87282	0.392323	1.20009e-06	1.45506e-05
Cs1g26520	-1.59412	3.28983	1.20082e-06	1.45507e-05
Cs7g05320	-1.78321	2.19262	1.22865e-06	1.48341e-05
Cs4g10250	-1.62997	2.9845	1.23051e-06	1.48476e-05
Cs3g23560	-1.06928	4.77435	1.23283e-06	1.48667e-05
Cs4g12310	-1.97929	2.37694	1.23422e-06	1.48744e-05
Cs2g06470	-2.33928	1.73071	1.24114e-06	1.49488e-05
Cs6g13830	-2.02884	1.66102	1.24292e-06	1.49614e-05
Cs2g05660	-1.1167	4.12009	1.25636e-06	1.51099e-05
Cs2g23070	2.37701	1.25711	1.26428e-06	1.51911e-05
Cs3g18340	1.66659	2.63342	1.27448e-06	1.53045e-05
Cs7g09780	-1.00862	4.22288	1.27661e-06	1.53208e-05
Cs6g05980	-2.6182	1.68365	1.27904e-06	1.53408e-05
Cs6g16790	-1.25057	4.18304	1.28486e-06	1.53922e-05
Cs7g02350	1.39979	3.95747	1.29921e-06	1.55363e-05
orange1.1t04497	-1.08524	3.80942	1.34526e-06	1.60677e-05
Cs9g07140	-2.14516	2.56909	1.35348e-06	1.61564e-05
Cs7g15990	-1.57575	2.9627	1.38693e-06	1.65359e-05
Cs2g17570	-1.60181	4.14391	1.3943e-06	1.66139e-05
Cs4g18290	2.48911	1.34693	1.42292e-06	1.69046e-05
Cs8g14310	-1.52473	3.0505	1.42682e-06	1.6941e-05
Cs4g16200	-2.04408	2.64036	1.43668e-06	1.7048e-05
Cs3g26870	-1.3779	3.52915	1.48652e-06	1.75769e-05
Cs6g12630	-1.47538	3.34324	1.49285e-06	1.76413e-05
orange1.1t02044	-1.11815	5.1689	1.51246e-06	1.7852e-05
orange1.1t05347	1.59157	4.78904	1.53501e-06	1.80631e-05
Cs9g19350	-2.04885	1.70417	1.53908e-06	1.80876e-05
Cs1g15640	-1.04084	4.96455	1.53964e-06	1.80876e-05
Cs2g12810	1.38153	3.198	1.54867e-06	1.81723e-05
orange1.1t02100	-1.84824	1.86391	1.5627e-06	1.83263e-05
Cs9g07810	1.51538	3.39948	1.60943e-06	1.88412e-05
Cs9g19340	-1.17241	3.75858	1.6126e-06	1.88554e-05
Cs6g13740	1.5614	2.9759	1.61357e-06	1.88554e-05
Cs6g05690	-1.06934	4.1934	1.61441e-06	1.88554e-05
Cs3g17220	2.41401	1.3737	1.61783e-06	1.88845e-05
Cs2g12940	1.33114	4.35086	1.63196e-06	1.9027e-05
Cs5g09530	-1.17965	4.75825	1.63282e-06	1.9027e-05
Cs2g24670	2.06759	9.12944	1.6329e-06	1.9027e-05
Cs5g24840	-1.10146	3.62911	1.6717e-06	1.94227e-05
Cs9g02490	1.06445	3.84816	1.6806e-06	1.94922e-05
Cs3g24480	-2.04114	1.29765	1.72119e-06	1.99399e-05
Cs3g12715	-1.4807	2.48165	1.74145e-06	2.01514e-05
Cs9g07280	7.68027	0.0816226	1.75174e-06	2.02587e-05
Cs8g17810	1.8376	2.98862	1.76488e-06	2.03871e-05
Cs1g11880	-1.4533	3.10505	1.77662e-06	2.05109e-05
Cs5g10190	-1.91193	2.47944	1.7843e-06	2.05877e-05
Cs4g02260	-1.11154	4.58877	1.78931e-06	2.06337e-05
orange1.1t02850	-2.4061	0.849278	1.80882e-06	2.08347e-05
Cs3g11300	4.93375	0.0487039	1.81388e-06	2.0869e-05
Cs2g22915	-1.16914	3.45953	1.8358e-06	2.10869e-05
Cs7g30680	-2.18895	1.48192	1.84263e-06	2.11483e-05
Cs7g24940	1.8011	7.6691	1.84343e-06	2.11483e-05
Cs2g03220	1.29459	4.85855	1.87493e-06	2.14728e-05
Cs4g11820	-1.77947	2.80433	1.89897e-06	2.16985e-05
Cs3g03160	-1.80879	1.7912	1.90208e-06	2.17216e-05
orange1.1t01865	1.19388	4.50775	1.92008e-06	2.19022e-05
orange1.1t00286	1.50771	2.45768	1.9298e-06	2.19611e-05
Cs4g15980	1.41227	3.213	1.92997e-06	2.19611e-05
orange1.1t06010	1.38968	3.35202	1.94012e-06	2.20555e-05
Cs1g19730	-2.55705	1.74122	1.949e-06	2.21439e-05
Cs5g03630	-1.74453	2.14645	1.9708e-06	2.23789e-05
Cs2g03180	2.73144	0.862991	2.00587e-06	2.27385e-05
Cs2g09600	1.53002	4.13478	2.0333e-06	2.30234e-05
Cs4g19400	-1.26328	7.37544	2.03734e-06	2.30561e-05
Cs4g11250	3.71796	1.77517	2.04589e-06	2.31268e-05
Cs5g01990	-1.99936	2.27381	2.05086e-06	2.31699e-05
Cs9g11690	-1.54565	2.45678	2.06042e-06	2.32599e-05
Cs1g25150	1.00456	4.72207	2.06146e-06	2.32599e-05
Cs2g07080	-4.50282	-0.323514	2.09267e-06	2.35758e-05
Cs1g14280	-6.95761	-0.531803	2.13588e-06	2.40355e-05
orange1.1t03769	2.31933	1.29882	2.14821e-06	2.41337e-05
orange1.1t03152	-1.92598	3.10018	2.16848e-06	2.43477e-05
Cs7g07450	1.17175	4.41281	2.18659e-06	2.45099e-05
Cs4g17140	-1.26143	3.17725	2.19101e-06	2.45457e-05
Cs3g25470	-1.57593	3.44597	2.21486e-06	2.47714e-05
Cs4g18330	1.10445	3.69776	2.21612e-06	2.47716e-05
orange1.1t00306	-1.24276	3.63243	2.22613e-06	2.48696e-05
Cs5g02920	2.35555	1.72926	2.24408e-06	2.50144e-05
Cs5g32090	1.03705	3.93703	2.30395e-06	2.55963e-05
Cs8g08010	-2.63523	0.968625	2.38288e-06	2.64146e-05
Cs7g17520	-1.18328	3.63225	2.45756e-06	2.71824e-05
Cs3g01480	-1.33992	2.94875	2.48333e-06	2.74522e-05
Cs7g25590	-1.56309	2.94503	2.4966e-06	2.75837e-05
Cs7g04430	-1.0792	3.68643	2.51852e-06	2.78106e-05
Cs9g03570	-1.00042	7.32991	2.55549e-06	2.81877e-05
orange1.1t00296	-1.69411	3.20832	2.56733e-06	2.83028e-05
Cs4g10750	-1.65411	3.02152	2.59528e-06	2.85897e-05
Cs6g21120	-6.79299	-0.662009	2.59621e-06	2.85897e-05
Cs5g24460	-1.07003	4.96979	2.60908e-06	2.87156e-05
Cs2g06640	-1.49872	3.90404	2.63801e-06	2.90181e-05
Cs6g20990	1.13098	4.46943	2.64535e-06	2.90828e-05
Cs5g02660	1.3515	3.64731	2.6978e-06	2.95946e-05
Cs1g01500	-1.51075	3.14124	2.76948e-06	3.0298e-05
Cs7g06850	-1.00307	4.07755	2.8272e-06	3.08789e-05
Cs3g14240	2.03377	2.55962	2.8877e-06	3.15225e-05
orange1.1t03698	-1.07689	3.68918	2.88991e-06	3.15294e-05
orange1.1t04938	-1.76193	2.58046	2.91591e-06	3.17785e-05
Cs5g08930	1.00116	4.52409	2.92098e-06	3.18164e-05
Cs7g03020	1.56273	2.43581	2.95996e-06	3.2206e-05
Cs7g08550	-1.11094	3.84246	3.06641e-06	3.331e-05
Cs1g24380	-1.12799	4.02365	3.10746e-06	3.37194e-05
Cs5g27530	1.05691	5.2769	3.11657e-06	3.37816e-05
Cs2g18290	1.98099	2.78967	3.2139e-06	3.47615e-05
Cs4g05190	2.19708	6.74296	3.22012e-06	3.481e-05
Cs5g21900	1.9865	4.82131	3.23712e-06	3.49748e-05
Cs9g02540	-3.64087	-0.0144187	3.40507e-06	3.66511e-05
Cs3g15140	-1.73605	2.5212	3.43899e-06	3.69669e-05
orange1.1t04133	1.71565	2.92513	3.43994e-06	3.69669e-05
Cs3g26940	-1.07769	4.09715	3.56222e-06	3.81582e-05
Cs6g02530	-1.19023	3.38582	3.57783e-06	3.83049e-05
Cs8g01090	2.53262	1.73922	3.72058e-06	3.9706e-05
Cs9g17330	-1.75044	1.7248	3.72664e-06	3.97496e-05
orange1.1t03941	-1.58931	3.87789	3.75744e-06	4.00354e-05
Cs3g09000	2.4249	2.89063	3.83179e-06	4.07843e-05
Cs8g19640	-1.00927	4.1238	3.89658e-06	4.14079e-05
orange1.1t01736	-6.56693	-0.835522	3.9217e-06	4.16307e-05
Cs6g13860	-2.39895	1.38638	3.97947e-06	4.21992e-05
Cs8g20130	2.25581	4.32322	4.03452e-06	4.27378e-05
Cs4g10110	-1.96219	2.51557	4.06032e-06	4.29883e-05
orange1.1t02977	1.17679	4.82083	4.06944e-06	4.30395e-05
Cs7g23810	-2.0711	2.70248	4.10298e-06	4.33484e-05
orange1.1t02321	-1.18909	3.45806	4.11777e-06	4.34601e-05
Cs4g12120	-2.56281	0.780974	4.11789e-06	4.34601e-05
Cs8g05810	-1.40128	4.671	4.13194e-06	4.35854e-05
Cs7g30330	-1.13753	4.44764	4.17249e-06	4.399e-05
Cs3g23250	1.49969	3.03149	4.24324e-06	4.46655e-05
Cs3g07800	-1.006	4.62603	4.44821e-06	4.6676e-05
Cs3g18090	1.69612	2.83032	4.50452e-06	4.7168e-05
Cs1g10670	-1.1725	3.76215	4.51443e-06	4.72265e-05
Cs3g17310	-1.39923	2.62779	4.66644e-06	4.87108e-05
Cs5g25765	-1.1275	3.42622	4.98872e-06	5.1832e-05
Cs3g19420	1.74763	3.39114	5.07094e-06	5.26044e-05
Cs5g09560	2.83407	2.27742	5.12942e-06	5.31835e-05
Cs1g18400	-1.02362	3.85264	5.155e-06	5.34212e-05
Cs6g15450	1.5586	3.92413	5.18872e-06	5.37428e-05
Cs6g12920	-2.86355	1.76691	5.23375e-06	5.41532e-05
Cs8g16720	-1.28101	3.6776	5.27989e-06	5.46025e-05
Cs3g07395	-1.87632	1.7248	5.34072e-06	5.5203e-05
Cs2g16580	-1.15559	3.78384	5.34557e-06	5.52247e-05
Cs4g16320	-1.59932	2.68058	5.43783e-06	5.61489e-05
Cs2g25640	-1.13114	3.55496	5.4696e-06	5.64478e-05
Cs5g29130	-1.14446	4.86604	5.51857e-06	5.68946e-05
Cs2g08610	1.23828	3.58709	5.60746e-06	5.76627e-05
Cs6g10210	-2.40968	1.17371	5.62485e-06	5.77527e-05
Cs1g18240	3.2798	0.114218	5.85597e-06	5.99108e-05
Cs9g04030	1.23661	4.21731	5.93217e-06	6.06285e-05
Cs5g09930	-2.71196	1.513	5.9938e-06	6.1196e-05
Cs3g07440	1.27296	3.70036	6.10997e-06	6.23186e-05
Cs4g03400	-1.05754	3.64717	6.14821e-06	6.26768e-05
Cs4g15735	1.42907	6.28098	6.16424e-06	6.28082e-05
Cs8g03110	1.88314	1.39414	6.20585e-06	6.31038e-05
Cs6g09780	1.0872	4.70283	6.21938e-06	6.32094e-05
Cs5g04620	-1.36715	2.83765	6.24484e-06	6.34038e-05
orange1.1t05903	3.33782	0.160831	6.29295e-06	6.38599e-05
Cs2g31450	-1.23112	4.79521	6.38938e-06	6.4642e-05
Cs6g09440	-1.10774	3.83643	6.43002e-06	6.50205e-05
orange1.1t02668	-3.19808	0.801037	6.51623e-06	6.56796e-05
Cs6g13990	1.00213	4.12774	6.6044e-06	6.64152e-05
orange1.1t01968	2.36117	0.572357	6.6606e-06	6.68462e-05
orange1.1t02050	1.52241	2.26055	6.84027e-06	6.84779e-05
Cs2g17200	-2.00489	1.3044	6.89815e-06	6.89196e-05
orange1.1t05017	-2.3579	3.61349	6.91235e-06	6.9027e-05
Cs5g05170	-1.42307	3.16419	7.07195e-06	7.04454e-05
Cs3g16650	1.57947	2.98055	7.08659e-06	7.05561e-05
Cs2g07200	-1.23944	3.24979	7.1187e-06	7.08055e-05
Cs5g33320	1.90025	4.56915	7.18793e-06	7.14231e-05
Cs8g19105	-1.67317	2.65574	7.24479e-06	7.19168e-05
Cs3g15200	-1.64997	2.60618	7.27136e-06	7.21091e-05
Cs9g07560	1.08353	4.79457	7.39856e-06	7.32256e-05
Cs4g03470	2.0388	2.2844	7.46671e-06	7.38272e-05
Cs5g08000	1.1847	3.55976	7.52418e-06	7.43221e-05
Cs1g02590	-1.13616	3.57678	7.56787e-06	7.47169e-05
orange1.1t00080	-1.12852	3.41653	7.62371e-06	7.52311e-05
Cs9g06420	-1.01066	4.26315	7.6388e-06	7.53429e-05
Cs4g15290	-1.15309	3.58832	7.77553e-06	7.66161e-05
Cs7g29980	1.52045	2.20222	8.00277e-06	7.8536e-05
Cs5g31660	2.11786	2.97046	8.06675e-06	7.90956e-05
Cs5g22400	-2.90524	0.352158	8.13612e-06	7.96212e-05
Cs1g22570	2.13645	2.20847	8.33516e-06	8.141e-05
Cs3g16230	-1.00863	3.98716	8.34655e-06	8.14815e-05
Cs5g32450	-1.10523	4.30871	8.36871e-06	8.16183e-05
Cs1g19360	-1.01568	3.74792	8.50305e-06	8.28077e-05
Cs5g04080	1.11321	4.78326	8.90835e-06	8.65025e-05
orange1.1t01397	-2.05065	1.30457	8.92763e-06	8.66082e-05
Cs6g10520	1.08907	4.53027	9.00117e-06	8.7277e-05
Cs4g09780	1.46264	9.7487	9.0076e-06	8.7297e-05
orange1.1t04063	-1.64606	2.6146	9.04028e-06	8.75292e-05
Cs7g08240	-1.71742	2.12698	9.19957e-06	8.89424e-05
Cs9g08110	-3.35262	-0.239998	9.40348e-06	9.08701e-05
Cs6g06120	-1.6967	1.83505	9.48214e-06	9.14538e-05
Cs3g22210	1.04445	3.96584	9.81978e-06	9.44376e-05
Cs7g20560	-1.26383	3.07274	1.00735e-05	9.67383e-05
Cs6g18870	1.0665	3.70536	1.01117e-05	9.70585e-05
Cs1g25830	-1.36563	4.50296	1.01476e-05	9.73097e-05
Cs3g05280	-1.16973	4.41798	1.03561e-05	9.91195e-05
Cs5g01440	1.17544	3.76689	1.05824e-05	0.000101141
Cs1g26560	1.13171	3.42951	1.05973e-05	0.000101235
Cs9g01060	1.11482	3.62278	1.09105e-05	0.000104029
Cs8g04550	-2.39813	1.01193	1.09833e-05	0.000104574
Cs9g06670	1.41249	3.7579	1.11156e-05	0.000105732
Cs3g16510	2.23387	1.72452	1.1127e-05	0.000105791
Cs7g15030	-1.53654	5.67379	1.12283e-05	0.000106653
Cs7g31300	-1.00338	3.59797	1.13151e-05	0.000107426
Cs5g08380	1.96742	1.39423	1.14108e-05	0.000108028
Cs5g02200	-1.51136	2.57127	1.14472e-05	0.00010827
Cs7g10990	-1.33219	2.68802	1.16907e-05	0.000110365
Cs5g06000	-1.18895	2.93508	1.1749e-05	0.000110811
Cs8g19400	-1.21832	3.67293	1.18121e-05	0.000111354
Cs1g08740	-1.60032	2.28737	1.18454e-05	0.000111615
Cs7g28110	1.90773	5.3422	1.18554e-05	0.000111657
Cs4g06580	-1.46088	3.12748	1.19674e-05	0.000112567
Cs3g09090	-1.29598	3.62689	1.19689e-05	0.000112567
Cs5g16540	-1.13856	4.40525	1.22993e-05	0.00011535
Cs2g18590	-1.06159	3.66212	1.2349e-05	0.000115762
Cs2g30480	1.00683	5.63303	1.23889e-05	0.000116027
Cs6g15420	-1.00677	3.96312	1.23964e-05	0.000116043
Cs8g18970	-1.20631	4.22426	1.24199e-05	0.000116209
Cs2g02480	1.02664	4.40658	1.24905e-05	0.000116815
Cs6g16130	-2.52696	1.00351	1.25306e-05	0.000117135
Cs3g26680	1.66823	2.70293	1.25821e-05	0.000117562
Cs4g18140	1.40957	3.09013	1.264e-05	0.000117938
Cs3g25000	-2.55891	2.41046	1.2657e-05	0.000118042
Cs1g03210	-1.82628	1.82548	1.27444e-05	0.000118747
orange1.1t03684	1.71345	2.4421	1.27735e-05	0.000118962
Cs5g28770	-1.49003	2.83814	1.28152e-05	0.00011924
Cs8g09980	1.73635	1.99819	1.30421e-05	0.000121238
Cs5g01480	-5.0251	-0.55701	1.31705e-05	0.000122375
Cs7g16380	1.45862	2.36067	1.34366e-05	0.000124559
Cs5g27130	1.33732	2.99382	1.38148e-05	0.000127769
Cs1g19660	-1.01235	3.72182	1.38923e-05	0.000128427
Cs6g16780	-3.20418	0.906337	1.39639e-05	0.000129029
Cs9g05660	-2.17591	1.36639	1.4036e-05	0.000129576
Cs4g06720	1.47077	2.20953	1.40601e-05	0.000129739
Cs4g05900	-6.29892	-1.03271	1.42878e-05	0.000131477
Cs8g06750	-1.07693	6.11165	1.43412e-05	0.000131823
orange1.1t00577	-2.12853	2.76238	1.43543e-05	0.000131846
Cs6g03770	-2.47164	0.839762	1.45477e-05	0.000133562
Cs7g24650	-4.73772	-0.775333	1.51606e-05	0.00013849
Cs7g29750	2.58206	0.881633	1.53478e-05	0.000140073
Cs3g08110	-1.15624	3.59149	1.56053e-05	0.000142294
orange1.1t00266	-1.00865	3.99688	1.57737e-05	0.000143698
Cs2g29700	-2.29376	0.820131	1.59145e-05	0.000144915
Cs9g01750	2.71525	0.525275	1.62063e-05	0.000147371
Cs6g12400	-2.40623	0.58785	1.63397e-05	0.00014845
orange1.1t00122	-1.34746	2.44398	1.66066e-05	0.000150602
Cs5g33620	-1.36618	2.99958	1.67496e-05	0.000151761
Cs6g20090	1.06253	3.86901	1.67718e-05	0.000151893
Cs6g04230	-1.37664	4.64845	1.69265e-05	0.000153156
Cs1g20100	-1.18338	3.84108	1.69558e-05	0.000153352
Cs7g29740	2.64184	0.374516	1.70258e-05	0.000153915
Cs6g09730	1.00846	7.65871	1.70965e-05	0.000154346
Cs9g07610	-1.22834	3.19764	1.71995e-05	0.000155206
Cs6g20830	1.04249	5.47637	1.72211e-05	0.000155261
orange1.1t05899	-1.85309	1.58275	1.73156e-05	0.000155903
Cs8g05910	1.57822	3.44575	1.73981e-05	0.000156505
Cs4g11670	-2.07165	1.61167	1.75069e-05	0.000157413
Cs1g16220	1.03852	6.38489	1.76378e-05	0.00015849
Cs1g18350	-1.20081	3.50782	1.82286e-05	0.000163097
Cs2g21380	-1.0114	3.52524	1.82375e-05	0.000163104
Cs4g06650	-1.42318	6.46488	1.85505e-05	0.000165671
Cs4g10410	1.28055	4.19075	1.85576e-05	0.000165671
Cs1g07090	-1.19525	3.48304	1.8666e-05	0.000166565
orange1.1t01353	-1.30937	4.82376	1.88892e-05	0.000168481
Cs9g17460	2.38476	3.67362	1.89777e-05	0.000169094
Cs8g18450	1.27677	3.53465	1.89832e-05	0.000169094
Cs9g03000	-1.59003	3.01442	1.89973e-05	0.000169145
Cs5g31960	-1.03484	3.76076	1.91855e-05	0.000170668
Cs2g13060	-1.86905	2.20786	1.92432e-05	0.000171106
Cs9g12570	2.45354	1.07381	1.9308e-05	0.000171605
Cs2g24784	-4.77768	-0.746222	1.93673e-05	0.00017198
Cs2g12700	-4.13535	-0.608581	1.95613e-05	0.000173549
Cs2g23260	-2.99447	0.633224	1.96162e-05	0.000173959
orange1.1t02780	1.42979	3.79355	1.96907e-05	0.000174389
Cs8g12710	2.39984	1.03193	1.99271e-05	0.000176171
Cs9g06490	-1.03348	5.94719	2.02255e-05	0.000178415
Cs9g14780	-1.0155	5.01664	2.0276e-05	0.000178782
Cs5g17530	-1.0964	4.14947	2.09367e-05	0.000184121
Cs1g03820	-3.02046	0.195649	2.09862e-05	0.000184395
Cs5g26660	-1.35363	3.65887	2.10861e-05	0.000184949
Cs5g06120	-1.08321	3.49986	2.1158e-05	0.000185336
orange1.1t01664	1.0543	3.66408	2.13444e-05	0.000186724
Cs4g10710	1.00629	4.91111	2.27437e-05	0.000198272
orange1.1t00556	1.00342	6.66439	2.28621e-05	0.000199219
Cs6g20150	1.00255	4.33256	2.30233e-05	0.000200535
orange1.1t02782	-1.81654	1.83996	2.30714e-05	0.000200793
Cs7g05990	-1.06507	3.66902	2.34341e-05	0.00020343
Cs6g09330	-1.40769	3.28037	2.34368e-05	0.00020343
Cs2g22900	-1.07662	4.84463	2.37483e-05	0.000205778
Cs2g26230	-1.40893	3.03798	2.40599e-05	0.000208298
Cs5g30560	-1.00533	3.62909	2.42146e-05	0.000209546
Cs5g14490	-1.1123	3.74164	2.451e-05	0.000212011
Cs7g06120	1.39272	4.88496	2.49297e-05	0.00021524
orange1.1t03827	-2.70787	1.46379	2.49369e-05	0.00021524
Cs2g16630	1.18674	3.48233	2.51505e-05	0.000216896
orange1.1t03197	-1.04345	3.73114	2.51682e-05	0.000216956
Cs9g12620	2.28819	1.57669	2.51943e-05	0.000217087
Cs4g11760	-1.99372	1.84053	2.53718e-05	0.000218429
Cs2g30240	1.01636	4.18104	2.5883e-05	0.000222543
Cs4g20330	-1.90547	1.19594	2.59427e-05	0.000222961
Cs2g06550	-6.14346	-1.14244	2.6794e-05	0.000229391
orange1.1t02029	-1.32217	3.44613	2.70373e-05	0.000231213
Cs4g11830	-1.52095	3.0875	2.70767e-05	0.000231417
Cs1g24010	1.55197	2.94286	2.71914e-05	0.000232199
Cs9g09710	-2.78377	0.365592	2.72125e-05	0.00023228
Cs9g12750	-2.98241	0.165221	2.74305e-05	0.000234041
Cs5g23830	1.57992	2.49787	2.75251e-05	0.000234614
Cs2g06500	-1.09384	3.25477	2.76467e-05	0.000235484
Cs7g14360	-6.24901	-1.06836	2.78297e-05	0.000236942
Cs6g17670	4.54505	-0.90059	2.7953e-05	0.000237789
Cs2g03890	-1.38948	2.42806	2.80826e-05	0.000238589
orange1.1t03583	-1.65631	2.2694	2.83974e-05	0.000240651
Cs6g11040	1.2748	3.01728	2.85967e-05	0.000242238
Cs5g31400	2.49981	1.56477	2.86262e-05	0.000242386
Cs3g15670	1.61537	1.73036	2.98991e-05	0.000252417
Cs6g12040	-1.05942	3.37568	3.00552e-05	0.000253628
orange1.1t03286	-1.9376	1.38562	3.01055e-05	0.000253945
Cs7g01880	-2.78316	0.365624	3.02515e-05	0.00025507
Cs2g17390	-1.62823	2.09512	3.03974e-05	0.000256192
Cs8g04510	-1.04736	4.00041	3.04419e-05	0.000256459
Cs3g24260	1.23552	7.18953	3.16554e-05	0.000265677
Cs1g15880	-3.32676	-0.260575	3.25179e-05	0.000271891
Cs9g12040	-3.45167	-0.412709	3.28389e-05	0.000274118
Cs6g21410	1.54806	2.26489	3.29536e-05	0.000274961
Cs7g22920	-4.17126	-0.582602	3.33397e-05	0.000277951
Cs1g12050	-1.84802	1.60573	3.34502e-05	0.00027864
Cs9g09530	-1.06682	3.62775	3.36071e-05	0.000279715
Cs3g27400	1.33174	2.758	3.38545e-05	0.000281307
orange1.1t03466	1.70422	1.87757	3.39308e-05	0.000281824
Cs7g27630	3.01285	0.206943	3.40131e-05	0.000282391
orange1.1t03787	1.61369	1.96324	3.43332e-05	0.00028493
Cs1g24730	-1.09735	5.51846	3.45455e-05	0.000286454
Cs7g32200	-2.84346	0.781164	3.4681e-05	0.000287222
Cs1g17360	-2.47929	0.493246	3.47028e-05	0.000287284
Cs2g02880	4.82601	-0.692533	3.48778e-05	0.000288494
Cs7g16040	-1.01481	3.97695	3.50423e-05	0.000289615
Cs5g03730	-1.21386	2.88485	3.50954e-05	0.000289935
Cs1g02580	-1.85808	1.4183	3.53758e-05	0.000292131
orange1.1t01780	1.92791	2.96601	3.56476e-05	0.000294012
orange1.1t02258	-1.53798	2.29797	3.59902e-05	0.00029635
orange1.1t05945	1.15342	3.3708	3.63461e-05	0.000298912
Cs8g18810	-1.69774	1.49352	3.65508e-05	0.000300472
Cs2g13300	1.80171	1.45179	3.68092e-05	0.000302388
Cs4g01060	-1.07027	3.52848	3.69319e-05	0.000302938
Cs3g08480	1.14045	3.24997	3.69532e-05	0.000302938
Cs3g26720	2.62942	0.264812	3.69566e-05	0.000302938
Cs2g09500	3.00969	1.015	3.73572e-05	0.000305847
Cs9g10650	-2.79716	0.820421	3.74008e-05	0.000306079
Cs7g09050	3.27944	0.114115	3.75487e-05	0.000307164
Cs5g28410	1.10737	3.72885	3.77934e-05	0.000308787
Cs5g18930	-4.92462	-0.635037	3.80696e-05	0.00031079
Cs9g18120	-1.38275	2.26566	3.91874e-05	0.000319656
Cs9g04250	-1.24088	3.02914	4.10254e-05	0.000333157
Cs9g06060	1.96256	2.09272	4.1053e-05	0.000333246
Cs3g09030	-2.69144	1.13484	4.12096e-05	0.000334111
orange1.1t00499	-1.00033	3.96195	4.14783e-05	0.000336018
Cs2g12180	1.69576	1.65587	4.26451e-05	0.000344496
Cs3g05180	-1.16821	3.19947	4.31721e-05	0.000348472
Cs5g20250	1.31128	2.76146	4.32755e-05	0.000349025
orange1.1t00821	-1.74746	2.15089	4.39982e-05	0.000354141
Cs2g13170	3.28659	0.559752	4.42323e-05	0.000355454
Cs1g05470	1.14164	3.1854	4.47765e-05	0.000359108
Cs6g16690	1.73575	1.37469	4.4821e-05	0.000359321
Cs1g14060	-1.11641	3.47805	4.55132e-05	0.000363996
Cs5g19520	2.59124	0.334886	4.57502e-05	0.000365731
Cs8g17460	1.13948	3.17784	4.58116e-05	0.000365945
orange1.1t02599	2.31425	0.537027	4.58703e-05	0.000366143
Cs7g28970	-4.33134	-0.459111	4.58729e-05	0.000366143
Cs7g22420	-1.8334	3.84291	4.601e-05	0.000367091
Cs1g15440	-3.82529	-0.122754	4.62731e-05	0.000369043
Cs6g18400	2.63686	0.786633	4.68688e-05	0.000372903
Cs5g16690	-1.15583	3.38912	4.7374e-05	0.000376475
Cs5g30500	-1.44531	4.18402	4.82469e-05	0.000382804
Cs1g20310	-6.08776	-1.18094	4.89963e-05	0.000387676
orange1.1t01554	-1.34464	2.71422	4.90528e-05	0.00038797
Cs6g16440	-1.96822	1.55965	4.97699e-05	0.000393486
Cs7g11680	-1.87314	1.84038	4.98726e-05	0.000393988
orange1.1t02557	1.53131	2.65623	4.99339e-05	0.000394317
Cs5g34700	-1.33996	3.34944	5.02314e-05	0.000396197
orange1.1t00156	-1.79327	2.55466	5.0804e-05	0.000400556
Cs6g15590	1.63048	2.90942	5.0866e-05	0.00040073
Cs3g22760	1.09743	3.06766	5.12978e-05	0.000403497
Cs3g10440	1.21985	4.72151	5.15812e-05	0.000405408
Cs8g19840	1.16063	6.89269	5.18332e-05	0.000406921
Cs6g14570	2.24427	3.59945	5.18347e-05	0.000406921
Cs4g01480	-2.81537	-0.10434	5.2164e-05	0.000409346
Cs9g06370	-1.2308	3.09112	5.24577e-05	0.000411329
Cs8g03380	-1.60545	2.09525	5.30677e-05	0.00041595
Cs4g15770	-1.73219	2.67769	5.42139e-05	0.000423609
orange1.1t00650	-1.37193	3.21724	5.48485e-05	0.000428066
Cs6g08810	-1.05816	3.23654	5.56413e-05	0.000433747
Cs4g10170	-1.34029	2.49384	5.68584e-05	0.000442958
orange1.1t02980	1.26259	3.54507	5.76737e-05	0.000448315
Cs8g01860	-1.36996	2.40197	5.80107e-05	0.000450465
Cs5g16285	-1.27306	2.47803	5.88356e-05	0.000456694
orange1.1t03782	-1.03821	3.46393	5.91444e-05	0.000458913
Cs4g10830	-1.96186	1.40567	5.98223e-05	0.000463455
Cs2g13610	1.43861	4.71362	6.09371e-05	0.000470636
orange1.1t00434	-1.98472	2.88357	6.10648e-05	0.000471441
Cs7g31790	1.05542	4.42084	6.10986e-05	0.00047152
Cs6g09810	1.13811	3.61168	6.14096e-05	0.000473738
Cs3g26270	-1.92862	1.37911	6.21112e-05	0.000478782
Cs2g04900	-1.14927	3.28717	6.31225e-05	0.00048583
Cs5g22790	-1.60984	1.5534	6.33933e-05	0.000487727
Cs3g15590	-1.00984	4.22245	6.48309e-05	0.00049745
Cs4g18380	1.0764	4.07918	6.50745e-05	0.000499128
Cs5g06680	-1.28899	3.02726	6.65535e-05	0.000509498
Cs7g06130	1.12591	3.33043	6.6694e-05	0.000510184
orange1.1t00851	1.12905	5.18457	6.7763e-05	0.000517571
orange1.1t00363	-1.77514	1.29739	6.81024e-05	0.000519569
Cs1g15830	-1.12273	3.74973	6.81842e-05	0.000519996
Cs3g07940	-1.22011	3.76619	6.9468e-05	0.00052878
Cs4g03220	6.90922	-0.5606	6.97407e-05	0.000530051
Cs5g31280	-1.30806	2.40544	7.00269e-05	0.000532024
Cs6g02180	-2.05016	4.53539	7.0293e-05	0.000533641
Cs3g18050	2.29151	1.23454	7.09997e-05	0.000537784
Cs8g07230	-1.04882	6.4903	7.11525e-05	0.000538737
orange1.1t01790	-1.07768	5.24825	7.25933e-05	0.000549024
Cs4g10040	2.75615	1.31915	7.34779e-05	0.000554459
Cs7g06580	1.45452	1.91904	7.42191e-05	0.000559421
Cs2g10140	2.59853	2.52289	7.49114e-05	0.000564214
Cs5g30900	-1.78699	1.68259	7.55963e-05	0.000569159
orange1.1t01837	1.24015	2.90284	7.56843e-05	0.000569607
Cs8g01350	-2.938	0.379066	7.77786e-05	0.000584711
Cs6g16200	-1.09848	3.17696	7.9069e-05	0.000593077
Cs1g24810	-3.07938	-0.24	7.99081e-05	0.000598923
Cs3g14660	1.06157	3.08198	8.01213e-05	0.000600072
Cs6g15730	1.11886	2.90322	8.05524e-05	0.000603075
Cs7g01870	-2.98324	0.165145	8.08668e-05	0.000604977
Cs8g02880	-1.1584	3.05378	8.30377e-05	0.00062006
Cs4g03520	-1.3402	2.55657	8.35578e-05	0.000623479
Cs9g04190	-1.1459	2.73489	8.41171e-05	0.000626953
Cs5g31910	-1.07093	3.45346	8.53724e-05	0.000635835
Cs1g22010	-2.17971	0.553061	8.5464e-05	0.000636281
orange1.1t05908	1.84993	1.30652	8.58814e-05	0.000638914
Cs8g03410	-2.0335	2.29823	8.64526e-05	0.000642925
Cs7g05530	-1.01896	3.38883	8.69774e-05	0.000646109
Cs8g09710	-1.02219	3.173	8.70354e-05	0.0006463
Cs1g22300	-1.86218	1.23308	8.70705e-05	0.000646321
Cs7g02360	-1.07699	4.01473	8.72784e-05	0.000647385
Cs3g09300	-1.24537	3.17922	8.9349e-05	0.000661519
Cs1g23260	2.1908	0.816183	8.95477e-05	0.000662641
Cs7g02310	-1.18238	2.5177	9.07046e-05	0.000670318
Cs3g14590	-1.21961	2.89646	9.11203e-05	0.000672894
Cs9g07530	3.44962	0.06591	9.13382e-05	0.000674254
Cs7g22000	1.3131	8.06339	9.15997e-05	0.00067585
Cs1g11380	-1.93366	1.71984	9.16219e-05	0.00067585
orange1.1t02458	-4.69742	-0.80509	9.35568e-05	0.000689362
Cs2g01360	-1.91276	2.7072	9.44896e-05	0.000694958
orange1.1t03837	1.6242	1.69379	9.58985e-05	0.000702999
Cs4g03130	4.28967	2.61902	9.64245e-05	0.000706338
Cs7g07970	1.07426	3.27357	9.64808e-05	0.000706492
Cs2g24960	-1.52887	3.73782	9.73038e-05	0.000711998
Cs6g20440	-3.8692	-0.805272	9.73486e-05	0.000712066
Cs6g18430	1.04943	3.26261	9.81158e-05	0.000717154
Cs7g10380	2.35118	0.414267	9.87219e-05	0.00072087
Cs4g03700	1.16783	8.78186	0.000100357	0.000731665
Cs6g15510	-1.21455	3.04593	0.000100557	0.000732856
Cs5g20630	-1.02846	3.18234	0.000100785	0.000734252
Cs7g11810	-1.57098	2.75396	0.00010129	0.000737664
Cs5g11280	-1.74493	2.39254	0.000101464	0.00073847
orange1.1t01777	-1.33522	2.72772	0.000102299	0.000743393
Cs8g19150	-1.21397	3.32058	0.000102812	0.000746579
Cs6g08290	-1.75638	1.28316	0.000103292	0.00074925
Cs8g02870	-3.4439	-0.717751	0.000104023	0.000753193
Cs8g04250	-1.22921	2.7834	0.000104286	0.000754735
Cs8g01230	1.33162	2.65557	0.000105131	0.000760112
Cs1g06810	-1.61189	3.29713	0.000106238	0.000767563
Cs4g03060	3.12697	0.660496	0.000106736	0.000770884
Cs1g21920	-2.67001	1.43211	0.000108678	0.0007835
Cs2g22680	-1.00223	3.15939	0.000108855	0.00078421
Cs6g16590	-3.55137	-0.0858495	0.000112057	0.000806119
Cs2g18330	-1.15594	3.16192	0.000113115	0.000813146
Cs7g07700	3.76793	-0.461708	0.000115086	0.000825832
Cs1g20620	4.4157	0.387031	0.000115303	0.000827095
Cs6g07780	1.66061	3.6513	0.000115453	0.000827873
Cs3g17900	-1.0198	4.01415	0.000116243	0.000833242
Cs4g14590	-1.38635	2.25477	0.000118361	0.000847214
Cs2g22610	-6.08772	-1.18095	0.000119662	0.000855603
Cs7g25460	-1.04081	4.28259	0.000121958	0.000870468
orange1.1t00317	1.22574	2.42991	0.000123578	0.000880151
Cs3g05465	-2.02952	1.35961	0.000124386	0.000885594
Cs8g12080	-1.30235	2.35581	0.000126829	0.000901063
Cs3g16530	-1.36896	2.85713	0.000128907	0.000913561
Cs1g01090	-1.11083	3.11883	0.000130398	0.000923149
Cs9g02100	1.1308	4.86877	0.000131945	0.000933111
Cs5g16220	-1.91092	3.59106	0.000133786	0.000944687
Cs5g02570	-1.22028	2.58265	0.000133817	0.000944687
Cs3g09040	-2.68879	1.39983	0.000133966	0.000945401
Cs8g10650	-3.86797	-0.805154	0.000137372	0.000967393
Cs7g08380	-1.33023	2.17708	0.000137479	0.00096781
Cs4g03050	3.10204	0.278614	0.000137953	0.000970122
Cs2g25500	-1.77099	1.32521	0.000139972	0.000982946
Cs8g02940	-1.06331	4.17422	0.000140584	0.000986892
Cs4g07940	1.10101	3.72038	0.000140638	0.000986931
Cs8g16050	-1.11767	3.03274	0.000141851	0.00099405
orange1.1t02937	1.67434	2.14481	0.000142449	0.000997432
orange1.1t05042	-2.31215	1.91109	0.000143357	0.0010018
Cs4g18370	1.16365	2.80328	0.000144293	0.00100764
orange1.1t01552	-5.96923	-1.26119	0.000150501	0.0010488
Cs5g04320	1.57909	1.70423	0.000150992	0.00105186
Cs2g11520	2.55993	0.796361	0.000151064	0.00105199
Cs6g01350	-3.86783	-0.805181	0.000153717	0.0010675
Cs6g22210	-1.79155	1.53575	0.000154372	0.0010713
Cs4g03140	2.50155	2.35536	0.000156227	0.0010823
Cs9g19120	-7.31404	-0.239727	0.000157519	0.00108975
Cs7g15410	-1.07966	3.19959	0.000158187	0.00109389
Cs6g03750	-1.43997	2.48807	0.000161345	0.00111353
Cs7g23150	-1.31992	2.46914	0.000161667	0.00111536
Cs1g12190	-1.14436	2.46248	0.000162671	0.00112171
orange1.1t01247	1.20942	3.55751	0.000163271	0.00112449
Cs1g02690	6.07141	-1.18317	0.000163512	0.00112577
Cs2g22660	2.2262	2.9216	0.000164281	0.00113068
orange1.1t03822	-1.43063	2.43468	0.00016699	0.00114735
Cs9g04630	-2.67345	2.29244	0.000171169	0.00117365
Cs5g01400	-4.81574	-0.71761	0.000172497	0.00118195
Cs9g09570	-1.61157	2.17727	0.000173851	0.00119
Cs9g12240	-1.19005	2.95091	0.000174452	0.00119371
orange1.1t03169	-2.15013	0.655093	0.000175701	0.00120143
orange1.1t00366	-4.27467	-1.10504	0.0001779	0.0012144
Cs7g02830	2.29271	1.23515	0.000178229	0.00121623
Cs8g13800	-2.5334	0.365488	0.000178854	0.00121883
Cs6g10610	1.15647	5.57735	0.000182177	0.00123769
Cs3g21010	-2.24531	0.666038	0.000182741	0.00124111
Cs3g26160	-1.57521	1.80545	0.000184842	0.00125325
orange1.1t03845	-1.87534	0.858648	0.000185367	0.00125553
Cs2g07420	1.06226	3.58305	0.000187761	0.00126914
orange1.1t01882	1.13812	2.89407	0.00019211	0.00129551
Cs8g15610	1.59373	2.08581	0.000192379	0.00129689
orange1.1t01787	-1.14677	3.16189	0.00019381	0.00130478
Cs2g22200	-3.21489	-0.345544	0.000194782	0.00131
orange1.1t03930	-1.8754	1.06175	0.00020109	0.00135017
Cs3g16420	-1.1168	2.89398	0.000202567	0.00135826
Cs8g19070	-2.43746	0.378506	0.000205608	0.00137589
Cs1g09580	-1.83753	0.739729	0.000205891	0.00137687
Cs8g05740	-1.34799	2.46583	0.000207316	0.00138455
Cs7g10240	-1.09578	3.12646	0.000209911	0.00139962
Cs4g06230	-1.37694	2.19597	0.000211637	0.00141012
Cs5g27140	-1.5142	3.58517	0.000211827	0.00141045
Cs5g08910	-1.9557	1.19571	0.00021403	0.00142464
orange1.1t00746	6.01476	-1.22243	0.000215681	0.00143373
Cs1g18220	1.34686	7.96354	0.00021916	0.00145492
Cs5g25420	-4.47814	-0.964066	0.00022072	0.00146472
orange1.1t05946	3.31309	0.81473	0.000220782	0.00146472
Cs8g10910	-1.79868	0.968189	0.00022203	0.00147105
Cs2g12530	-1.17864	3.09508	0.000227722	0.00150577
Cs1g23030	-1.25688	3.10929	0.000229074	0.00151372
Cs8g04000	-3.78144	-0.866622	0.000230804	0.00152437
orange1.1t04294	1.00393	3.54431	0.000231863	0.00153012
Cs5g01600	-1.2418	3.00149	0.000231972	0.00153035
Cs7g08980	-1.70452	1.80129	0.000232906	0.00153398
Cs7g10180	-1.34598	2.99308	0.000234969	0.00154503
Cs5g21910	2.56953	1.05641	0.000235631	0.00154837
Cs4g18220	-2.01951	1.68302	0.000236583	0.0015536
Cs2g06400	-1.37733	2.45335	0.000239065	0.00156939
Cs5g35030	-2.78663	-0.281453	0.000239277	0.00157026
Cs7g09540	6.08695	1.55023	0.00023974	0.00157227
Cs6g09270	1.02803	3.41509	0.000242675	0.00158944
Cs2g02150	-1.00614	3.41986	0.000244251	0.0015982
Cs9g07750	1.0315	9.44862	0.000247602	0.00161696
Cs3g13430	-1.19141	2.90814	0.000248871	0.00162313
Cs9g16810	1.49782	4.80976	0.000249738	0.00162719
Cs6g15900	2.9651	-0.509903	0.000251503	0.0016371
orange1.1t02853	-1.26427	3.51496	0.000252029	0.00163946
Cs4g08495	-3.78288	-0.86675	0.000253305	0.00164669
Cs4g09150	-3.28136	-0.0858273	0.000255216	0.00165857
Cs2g19000	1.16675	2.81328	0.000258874	0.00167908
orange1.1t01015	1.1727	2.84898	0.000259293	0.00168125
Cs2g10220	4.62957	-0.838313	0.00025984	0.00168353
Cs5g04130	-1.25499	3.00382	0.000260064	0.00168353
Cs5g25410	-4.21879	-1.14253	0.000261436	0.00169186
Cs4g19700	-1.23171	2.54167	0.000266188	0.00172084
Cs8g10300	4.16472	0.175417	0.000266256	0.00172084
orange1.1t01574	8.53635	0.851123	0.000268431	0.00173377
Cs2g26075	-2.93191	-0.0144205	0.000272091	0.00175235
Cs1g09040	5.89141	-1.3048	0.000272882	0.0017563
Cs6g20790	5.75585	-1.39227	0.000273007	0.00175654
Cs5g19840	2.08688	2.10795	0.000273454	0.00175884
Cs6g12830	-2.04596	2.5402	0.000273671	0.00175968
Cs2g28550	-1.30501	1.99013	0.000273982	0.00176111
orange1.1t02504	-1.70521	1.11858	0.000274476	0.00176315
Cs5g28620	-3.05949	-0.45924	0.000275829	0.00177037
Cs9g12820	-3.14755	-0.635336	0.000275864	0.00177037
Cs7g28920	-1.55663	1.64968	0.000277632	0.00177944
Cs6g12910	-1.37197	1.81038	0.000279389	0.00178841
Cs3g22730	-1.11486	2.52951	0.000281439	0.00180038
Cs6g17340	1.31559	2.51328	0.000285174	0.00182137
Cs2g05550	-1.42088	1.9948	0.000286067	0.00182591
Cs4g19540	1.8109	1.40071	0.000286482	0.00182798
Cs8g14400	-1.2	2.29736	0.00028737	0.00183247
Cs5g33290	6.95254	2.37496	0.00029291	0.00186306
Cs5g26880	-1.22293	2.56525	0.000295179	0.0018763
Cs5g19140	-4.21887	-1.14256	0.000298964	0.00189916
orange1.1t03760	2.60149	-0.243334	0.000299766	0.00190365
Cs3g08520	-1.39245	2.56257	0.000302417	0.00191866
Cs5g09370	1.03398	6.09572	0.000307874	0.00194919
Cs3g12380	-2.42217	-0.0147165	0.000307904	0.00194919
Cs6g04580	-1.53901	2.31178	0.000310624	0.00196451
Cs8g08310	-1.2227	5.54946	0.000313092	0.00197762
Cs7g20060	-2.56358	0.297241	0.000313718	0.00198095
Cs1g23710	-1.03502	3.05589	0.000315564	0.00199073
Cs4g09250	4.49828	-0.933275	0.000317864	0.00200397
Cs9g12810	-1.5199	1.78572	0.000320826	0.00201884
Cs4g15140	-2.30923	0.994816	0.00032553	0.00204651
Cs5g10280	2.06834	2.82099	0.000327134	0.00205595
Cs5g27440	-1.77244	1.325	0.000329017	0.00206713
Cs4g19360	-1.31876	2.84447	0.000329162	0.0020674
Cs4g02140	1.98308	0.606705	0.000331208	0.0020783
Cs4g03830	-1.16155	3.39927	0.000339616	0.00212573
orange1.1t02520	-6.08747	-1.18099	0.000347603	0.00217233
Cs2g28260	-1.35705	2.04139	0.000348506	0.00217729
Cs3g02530	-1.098	2.79061	0.000348614	0.00217729
orange1.1t00608	1.10395	3.34791	0.000349613	0.00218149
Cs5g18500	-1.22717	2.62527	0.000354052	0.00220456
Cs1g16850	1.56406	1.4142	0.000354139	0.00220456
Cs5g08460	-1.08929	2.56779	0.000356875	0.00221508
Cs6g03520	-1.55799	2.18519	0.000367512	0.00227406
Cs2g11380	1.1314	3.23212	0.000369657	0.00228522
Cs8g11060	-1.29737	2.05794	0.000373856	0.00230904
Cs7g31120	1.68248	1.05	0.000374377	0.00231031
Cs1g13610	-1.01274	3.50445	0.00037507	0.00231368
Cs3g16525	-2.23051	0.830233	0.000377849	0.00233011
Cs7g07860	-1.10617	3.90772	0.000378176	0.00233141
orange1.1t02077	-2.4855	0.57649	0.000379252	0.00233732
Cs9g13520	-1.76439	1.22521	0.000380822	0.00234555
Cs5g10170	-2.7487	-0.0147343	0.000385865	0.00236861
Cs3g01070	1.27795	2.56915	0.000387884	0.00237665
Cs3g23940	-1.52217	2.87179	0.000387889	0.00237665
Cs7g24020	3.66358	-0.932952	0.000388806	0.0023801
orange1.1t06013	-1.36598	2.16192	0.000389911	0.00238541
Cs5g20350	-4.37908	-1.03276	0.000390456	0.00238801
Cs2g05460	1.18777	2.90528	0.000392507	0.00239983
Cs8g19950	-4.07703	-0.239923	0.000395421	0.0024169
Cs3g16790	2.97778	0.537769	0.000397165	0.00242609
Cs7g18550	-1.07123	3.49682	0.000413232	0.00251809
Cs3g24285	1.35696	3.05289	0.00041355	0.00251926
orange1.1t01686	-1.54415	2.01594	0.000416283	0.00253245
Cs3g18700	-1.19065	3.24087	0.000416347	0.00253245
orange1.1t00634	1.2962	6.42373	0.000417665	0.00253893
orange1.1t01117	-1.54413	2.5747	0.00042546	0.00257927
Cs2g15700	-1.87678	1.17287	0.000425704	0.00257997
Cs8g09620	2.32338	0.918571	0.000429562	0.00259863
Cs9g09100	-1.52759	2.17752	0.000430751	0.00260504
orange1.1t01639	2.08127	0.936947	0.000431473	0.00260862
Cs9g14100	1.40914	2.38718	0.000432408	0.00261348
Cs5g05360	-1.48953	2.56892	0.000434884	0.00262687
Cs9g12880	-5.69854	-1.4364	0.000445903	0.00268614
Cs5g09680	-1.01402	3.54441	0.000447009	0.00269038
Cs1g06525	-1.33241	2.44376	0.000452908	0.00272332
Cs2g16260	1.72228	8.3927	0.000456095	0.00274094
Cs8g11500	1.3663	2.55944	0.000458968	0.00275656
Cs4g10990	1.46326	1.68369	0.000464587	0.00278613
Cs1g22210	3.41507	-0.720334	0.000469463	0.00281285
Cs5g28560	-1.63755	1.42472	0.000471607	0.00282232
Cs1g04580	1.90038	0.489644	0.000472313	0.0028257
Cs1g18530	2.09756	0.375573	0.000472852	0.00282808
Cs9g13750	5.68399	-1.43792	0.000473013	0.0028282
Cs5g03980	-4.10032	-1.2206	0.000474157	0.00283335
Cs5g22520	3.04264	-0.691807	0.000478056	0.0028541
Cs6g16720	1.36461	1.78616	0.000483443	0.00288282
Cs4g19230	-2.60215	0.00259603	0.000485087	0.00288875
Cs4g07450	-1.08942	3.05402	0.000485158	0.00288875
Cs5g32840	-1.09076	2.9685	0.000487644	0.00290011
Cs5g31520	-1.67056	2.04185	0.000489556	0.00290975
Cs4g17505	-6.52574	-0.866539	0.000491956	0.00292142
Cs7g08110	2.93684	0.278243	0.000494522	0.00293404
Cs7g17335	1.0696	2.83311	0.000495137	0.00293682
Cs9g03590	-5.05614	-0.531779	0.000495952	0.00293992
orange1.1t01595	-4.90421	1.67927	0.000496166	0.00294032
Cs6g18350	4.35266	-1.03517	0.000499536	0.00295854
[truncated: 706 more rows]
